# Supplementary material for: Years of sand fixation with Caragana korshinskii drive the enrichment of its rhizosphere functional microbes by accumulating soil N
Source: PeerJ journal article supplement (doi:10.7717/peerj.14271), 2022-11-01
Supplement: ANOVA_diff_P0.05_result_of_fungi_in_fall.xlsx [file ANOVA_diff_P0.05_result_of_fungi_in_fall.xlsx]

## Sheet: phylum
Taxon	Abbreviation	Mean.In.Ck18	Mean.In.Ck12	Mean.In.Ck6	Fvalue	Pvalue	FDR	Ck12-Ck18_diff	Ck6-Ck18_diff	Ck6-Ck12_diff	Ck12-Ck18_lwr	Ck6-Ck18_lwr	Ck6-Ck12_lwr	Ck12-Ck18_upr	Ck6-Ck18_upr	Ck6-Ck12_upr	Ck12-Ck18_p.adj	Ck6-Ck18_p.adj	Ck6-Ck12_p.adj
Glomeromycota	Glom	0.00654206	0.000650142	0.001154	10.9695	0.00136122	0.0163347	-0.589191	-0.538805	0.050386	-0.950161	-0.917393	-0.328202	-0.228222	-0.160218	0.428974	0.00209112	0.00599571	0.935608

## Sheet: class
Taxon	Mean.In.Ck18	Mean.In.Ck12	Mean.In.Ck6	Fvalue	Pvalue	FDR	Ck12-Ck18_diff	Ck6-Ck18_diff	Ck6-Ck12_diff	Ck12-Ck18_lwr	Ck6-Ck18_lwr	Ck6-Ck12_lwr	Ck12-Ck18_upr	Ck6-Ck18_upr	Ck6-Ck12_upr	Ck12-Ck18_p.adj	Ck6-Ck18_p.adj	Ck6-Ck12_p.adj
Cystobasidiomycetes	9.48124e-05	0	0	13.0554	0.000631063	0.00986403	-0.00948124	-0.00948124	-1.73472e-18	-0.0150057	-0.0152754	-0.00579414	-0.00395674	-0.0036871	0.00579414	0.0013775	0.00204872	1
Leotiomycetes	0.043546	0.000623053	6.50142e-05	12.6398	0.000730669	0.00986403	-4.29229	-4.3481	-0.0558039	-6.84926	-7.02987	-2.73757	-1.73533	-1.66633	2.62597	0.00165937	0.00220813	0.998366
Glomeromycetes	0.00654206	0.000650142	0.001154	10.9695	0.00136122	0.012251	-0.589191	-0.538805	0.050386	-0.950161	-0.917393	-0.328202	-0.228222	-0.160218	0.428974	0.00209112	0.00599571	0.935608

## Sheet: order
Taxon	Mean.In.Ck18	Mean.In.Ck12	Mean.In.Ck6	Fvalue	Pvalue	FDR	Ck12-Ck18_diff	Ck6-Ck18_diff	Ck6-Ck12_diff	Ck12-Ck18_lwr	Ck6-Ck18_lwr	Ck6-Ck12_lwr	Ck12-Ck18_upr	Ck6-Ck18_upr	Ck6-Ck12_upr	Ck12-Ck18_p.adj	Ck6-Ck18_p.adj	Ck6-Ck12_p.adj
Helotiales	0.043397	0.000623053	3.25071e-05	12.546	0.000755583	0.0387949	-4.27739	-4.33645	-0.0590546	-6.83595	-7.01988	-2.74249	-1.71884	-1.65301	2.62438	0.00171696	0.00226798	0.998173
Glomerales	0.00654206	0.000650142	0.001154	10.9695	0.00136122	0.0387949	-0.589191	-0.538805	0.050386	-0.950161	-0.917393	-0.328202	-0.228222	-0.160218	0.428974	0.00209112	0.00599571	0.935608
Sebacinales	0.00690776	0	4.87607e-05	4.99547	0.0230445	0.437845	-0.690776	-0.6859	0.00487607	-1.33939	-1.36617	-0.675392	-0.0421664	-0.00563245	0.685144	0.0363906	0.0480318	0.999806

## Sheet: family
Taxon	Mean.In.Ck18	Mean.In.Ck12	Mean.In.Ck6	Fvalue	Pvalue	FDR	Ck12-Ck18_diff	Ck6-Ck18_diff	Ck6-Ck12_diff	Ck12-Ck18_lwr	Ck6-Ck18_lwr	Ck6-Ck12_lwr	Ck12-Ck18_upr	Ck6-Ck18_upr	Ck6-Ck12_upr	Ck12-Ck18_p.adj	Ck6-Ck18_p.adj	Ck6-Ck12_p.adj
Glomeraceae	0.00654206	0.000650142	0.001154	10.9695	0.00136122	0.149735	-0.589191	-0.538805	0.050386	-0.950161	-0.917393	-0.328202	-0.228222	-0.160218	0.428974	0.00209112	0.00599571	0.935608
Camarosporidiellaceae	0.00174726	6.77231e-05	0.000130028	6.28969	0.0112482	0.600177	-0.167953	-0.161723	0.00623053	-0.306638	-0.307176	-0.139223	-0.0292689	-0.0162693	0.151684	0.0175597	0.0288597	0.993098
Stachybotryaceae	0.000338616	0.00773398	0.044356	3.9534	0.0435354	0.600177	0.739537	4.40173	3.6622	-3.38884	0.0718546	-0.667682	4.86791	8.73161	7.99208	0.886839	0.0461287	0.103414
Bulleribasidiaceae	0.000243803	0	0	3.94497	0.0437707	0.600177	-0.0243803	-0.0243803	8.67362e-18	-0.0502232	-0.0514845	-0.0271042	0.00146248	0.00272384	0.0271042	0.0656112	0.0807028	1
Botryosphaeriaceae	6.77231e-05	0	0	3.90467	0.0449159	0.600177	-0.00677231	-0.00677231	-2.60209e-18	-0.0139878	-0.01434	-0.0075677	0.000443201	0.000795382	0.0075677	0.0671348	0.0824575	1

## Sheet: genus
Taxon	Mean.In.Ck18	Mean.In.Ck12	Mean.In.Ck6	Fvalue	Pvalue	FDR	Ck12-Ck18_diff	Ck6-Ck18_diff	Ck6-Ck12_diff	Ck12-Ck18_lwr	Ck6-Ck18_lwr	Ck6-Ck12_lwr	Ck12-Ck18_upr	Ck6-Ck18_upr	Ck6-Ck12_upr	Ck12-Ck18_p.adj	Ck6-Ck18_p.adj	Ck6-Ck12_p.adj
Filobasidium	0.000609508	5.41785e-05	4.87607e-05	8.76755	0.00339888	0.457514	-0.055533	-0.0560748	-0.000541785	-0.0951946	-0.0976722	-0.0421392	-0.0158714	-0.0144774	0.0410556	0.0067383	0.00877847	0.99936
Alternaria	0.00475416	0.00037925	0.00212922	7.9332	0.00497298	0.457514	-0.437492	-0.262495	0.174997	-0.72664	-0.565756	-0.128265	-0.148343	0.0407663	0.478258	0.00380572	0.0944588	0.316091
Camarosporidiella	0.00174726	6.77231e-05	0.000130028	6.28969	0.0112482	0.575628	-0.167953	-0.161723	0.00623053	-0.306638	-0.307176	-0.139223	-0.0292689	-0.0162693	0.151684	0.0175597	0.0288597	0.993098
Comoclathris	0.00128674	4.06339e-05	0.000357578	5.91792	0.0137195	0.575628	-0.124611	-0.0929162	0.0316944	-0.222717	-0.195812	-0.0712009	-0.0265037	0.00997919	0.13459	0.0130276	0.0793882	0.705423
Albifimbria	0.000108357	0.00155763	0.0376432	4.68063	0.0277602	0.575628	0.144928	3.75349	3.60856	-3.27273	0.169022	0.0240941	3.56258	7.33795	7.19303	0.993235	0.0397295	0.0483965
Curvularia	0.000203169	0	0	4.30007	0.035004	0.575628	-0.0203169	-0.0203169	-2.34188e-17	-0.0409443	-0.041951	-0.0216341	0.000310364	0.00131716	0.0216341	0.0537719	0.066963	1
Aspergillus	0.000785589	0.0135311	0.00027631	4.17411	0.0378614	0.575628	1.27455	-0.0509278	-1.32548	-0.0634288	-1.45421	-2.72876	2.61253	1.35236	0.0778061	0.0628025	0.99504	0.0652546
Dioszegia	0.000243803	0	0	3.94497	0.0437707	0.575628	-0.0243803	-0.0243803	8.67362e-18	-0.0502232	-0.0514845	-0.0271042	0.00146248	0.00272384	0.0271042	0.0656112	0.0807028	1
Macrophoma	6.77231e-05	0	0	3.90467	0.0449159	0.575628	-0.00677231	-0.00677231	-2.60209e-18	-0.0139878	-0.01434	-0.0075677	0.000443201	0.000795382	0.0075677	0.0671348	0.0824575	1

## Sheet: species
Taxon	Mean.In.Ck18	Mean.In.Ck12	Mean.In.Ck6	Fvalue	Pvalue	FDR	Ck12-Ck18_diff	Ck6-Ck18_diff	Ck6-Ck12_diff	Ck12-Ck18_lwr	Ck6-Ck18_lwr	Ck6-Ck12_lwr	Ck12-Ck18_upr	Ck6-Ck18_upr	Ck6-Ck12_upr	Ck12-Ck18_p.adj	Ck6-Ck18_p.adj	Ck6-Ck12_p.adj
Alternaria_alternata	0.00471353	0.00037925	0.000942706	10.4221	0.0016904	0.338081	-0.433428	-0.377082	0.0563457	-0.701162	-0.657884	-0.224456	-0.165695	-0.0962812	0.337147	0.00223563	0.00901107	0.860414
Camarosporidiella_mackenziei	0.00169308	6.77231e-05	0.000130028	6.18429	0.0118929	0.541292	-0.162536	-0.156305	0.00623053	-0.297812	-0.298185	-0.135649	-0.0272587	-0.0144254	0.14811	0.0184243	0.0303565	0.992747
Filobasidium_chernovii	0.000270893	1.35446e-05	0	5.9428	0.0135359	0.541292	-0.0257348	-0.0270893	-0.00135446	-0.0485129	-0.0509791	-0.0252443	-0.00295671	-0.0031994	0.0225354	0.0263916	0.025855	0.987944
Albifimbria_verrucaria	0.000108357	0.00155763	0.0376432	4.68063	0.0277602	0.541292	0.144928	3.75349	3.60856	-3.27273	0.169022	0.0240941	3.56258	7.33795	7.19303	0.993235	0.0397295	0.0483965
Dioszegia_takashimae	0.000243803	0	0	3.94497	0.0437707	0.541292	-0.0243803	-0.0243803	8.67362e-18	-0.0502232	-0.0514845	-0.0271042	0.00146248	0.00272384	0.0271042	0.0656112	0.0807028	1
Glomus_aggregatum	0.00154409	0	0.000357578	3.82635	0.0472401	0.541292	-0.154409	-0.118651	0.0357578	-0.306562	-0.278231	-0.123822	-0.00225511	0.0409292	0.195338	0.0465286	0.162616	0.829482

## Sheet: README
标题	说明
Taxon	物种名称
Mean.In.*	各分组的平均值
Fvalue	F值
Pvalue	P值
FDR	校正之后的P值（BH方法校正后的P值）
组1-组2_diff	组1-组2 Tukey HSD检验,两组之间的观察值均值的差值。 注:组1、组2为示例名称，请以实际组名为准
组1-组2_lwr	组1-组2 Tukey HSD,差异区间的下限
组1-组2_upr	组1-组2 Tukey HSD,差异区间的上限
组1-组2_p.adj	组1-组2 Tukey HSD,多重校正后的P值
