# Supplementary material for: Years of sand fixation with Caragana korshinskii drive the enrichment of its rhizosphere functional microbes by accumulating soil N
Source: PeerJ journal article supplement (doi:10.7717/peerj.14271), 2022-11-01
Supplement: ANOVA_diff_P0.05_result_of_fungi_in_summer.xlsx [file ANOVA_diff_P0.05_result_of_fungi_in_summer.xlsx]

## Sheet: phylum
Taxon	Abbreviation	Mean.In.Ck18	Mean.In.Ck12	Mean.In.Ck6	Fvalue	Pvalue	FDR	Ck12-Ck18_diff	Ck6-Ck18_diff	Ck6-Ck12_diff	Ck12-Ck18_lwr	Ck6-Ck18_lwr	Ck6-Ck12_lwr	Ck12-Ck18_upr	Ck6-Ck18_upr	Ck6-Ck12_upr	Ck12-Ck18_p.adj	Ck6-Ck18_p.adj	Ck6-Ck12_p.adj
Glomeromycota	Glom	0.006747	0.0019723	0.00240665	11.447	0.00165415	0.021504	-0.47747	-0.434034	0.0434356	-0.771894	-0.728459	-0.250989	-0.183045	-0.13961	0.33786	0.00261623	0.00521785	0.918723

## Sheet: class
Taxon	Mean.In.Ck18	Mean.In.Ck12	Mean.In.Ck6	Fvalue	Pvalue	FDR	Ck12-Ck18_diff	Ck6-Ck18_diff	Ck6-Ck12_diff	Ck12-Ck18_lwr	Ck6-Ck18_lwr	Ck6-Ck12_lwr	Ck12-Ck18_upr	Ck6-Ck18_upr	Ck6-Ck12_upr	Ck12-Ck18_p.adj	Ck6-Ck18_p.adj	Ck6-Ck12_p.adj
Glomeromycetes	0.00672769	0.00185969	0.00233265	12.7413	0.00107673	0.035532	-0.4868	-0.439504	0.0472965	-0.770544	-0.723247	-0.236447	-0.203057	-0.15576	0.33104	0.00169939	0.00367092	0.897628
Microbotryomycetes	0	0.000334615	0.000112611	4.39613	0.0369554	0.609764	0.0334615	0.0112611	-0.0222004	0.0028235	-0.0193769	-0.0528384	0.0640995	0.0418991	0.00843758	0.0323416	0.602328	0.171852

## Sheet: order
Taxon	Mean.In.Ck18	Mean.In.Ck12	Mean.In.Ck6	Fvalue	Pvalue	FDR	Ck12-Ck18_diff	Ck6-Ck18_diff	Ck6-Ck12_diff	Ck12-Ck18_lwr	Ck6-Ck18_lwr	Ck6-Ck12_lwr	Ck12-Ck18_upr	Ck6-Ck18_upr	Ck6-Ck12_upr	Ck12-Ck18_p.adj	Ck6-Ck18_p.adj	Ck6-Ck12_p.adj
Glomerales	0.00672769	0.00185969	0.00233265	12.7413	0.00107673	0.0742942	-0.4868	-0.439504	0.0472965	-0.770544	-0.723247	-0.236447	-0.203057	-0.15576	0.33104	0.00169939	0.00367092	0.897628
Sporidiobolales	0	0.000334615	0.000112611	4.39613	0.0369554	0.665571	0.0334615	0.0112611	-0.0222004	0.0028235	-0.0193769	-0.0528384	0.0640995	0.0418991	0.00843758	0.0323416	0.602328	0.171852

## Sheet: family
Taxon	Mean.In.Ck18	Mean.In.Ck12	Mean.In.Ck6	Fvalue	Pvalue	FDR	Ck12-Ck18_diff	Ck6-Ck18_diff	Ck6-Ck12_diff	Ck12-Ck18_lwr	Ck6-Ck18_lwr	Ck6-Ck12_lwr	Ck12-Ck18_upr	Ck6-Ck18_upr	Ck6-Ck12_upr	Ck12-Ck18_p.adj	Ck6-Ck18_p.adj	Ck6-Ck12_p.adj
Glomeraceae	0.00672769	0.00184682	0.0023037	12.7453	0.00107536	0.146249	-0.488087	-0.4424	0.0456878	-0.772985	-0.727297	-0.239209	-0.20319	-0.157502	0.330585	0.00171831	0.00360468	0.904807
Stachybotryaceae	0.000772188	0.0106884	0.0523286	6.21524	0.0140442	0.681146	0.991619	5.15564	4.16403	-3.1485	1.01553	0.0239118	5.13173	9.29576	8.30414	0.801889	0.0155461	0.048663
Sporidiobolaceae	0	0.000334615	0.000112611	4.39613	0.0369554	0.681146	0.0334615	0.0112611	-0.0222004	0.0028235	-0.0193769	-0.0528384	0.0640995	0.0418991	0.00843758	0.0323416	0.602328	0.171852

## Sheet: genus
Taxon	Mean.In.Ck18	Mean.In.Ck12	Mean.In.Ck6	Fvalue	Pvalue	FDR	Ck12-Ck18_diff	Ck6-Ck18_diff	Ck6-Ck12_diff	Ck12-Ck18_lwr	Ck6-Ck18_lwr	Ck6-Ck12_lwr	Ck12-Ck18_upr	Ck6-Ck18_upr	Ck6-Ck12_upr	Ck12-Ck18_p.adj	Ck6-Ck18_p.adj	Ck6-Ck12_p.adj
Albifimbria	0.000482618	0.00406042	0.0472515	6.6563	0.0113519	0.664059	0.357781	4.67689	4.31911	-3.44892	0.870187	0.512406	4.16448	8.48359	8.12581	0.966032	0.016842	0.0264152
Comoclathris	0.00046653	0.000218787	2.89571e-05	5.63758	0.0187816	0.664059	-0.0247744	-0.0437573	-0.018983	-0.0596416	-0.0786246	-0.0538502	0.0100929	-0.0088901	0.0158843	0.182243	0.0148411	0.3468
Psathyrella	0	0.000160873	0.000521227	5.31172	0.0222708	0.664059	0.0160873	0.0521227	0.0360355	-0.0276055	0.00842997	-0.00765729	0.05978	0.0958155	0.0797282	0.601314	0.0199813	0.111511
Vishniacozyma	0.00013835	5.14792e-05	0.000476183	4.60366	0.0328226	0.664059	-0.00868712	0.0337832	0.0424704	-0.0481411	-0.00567077	0.00301635	0.0307669	0.0732372	0.0819244	0.82933	0.0968754	0.0348486
Hydropisphaera	0.000199482	0.00144142	0.014974	4.52236	0.0343739	0.664059	0.124194	1.47745	1.35326	-1.32976	0.0234962	-0.100697	1.57815	2.93141	2.80722	0.971845	0.0463448	0.0690086
Rhodotorula	0	0.000334615	0.000112611	4.39613	0.0369554	0.664059	0.0334615	0.0112611	-0.0222004	0.0028235	-0.0193769	-0.0528384	0.0640995	0.0418991	0.00843758	0.0323416	0.602328	0.171852

## Sheet: species
Taxon	Mean.In.Ck18	Mean.In.Ck12	Mean.In.Ck6	Fvalue	Pvalue	FDR	Ck12-Ck18_diff	Ck6-Ck18_diff	Ck6-Ck12_diff	Ck12-Ck18_lwr	Ck6-Ck18_lwr	Ck6-Ck12_lwr	Ck12-Ck18_upr	Ck6-Ck18_upr	Ck6-Ck12_upr	Ck12-Ck18_p.adj	Ck6-Ck18_p.adj	Ck6-Ck12_p.adj
Albifimbria_verrucaria	0.000482618	0.00406042	0.0472515	6.6563	0.0113519	0.604501	0.357781	4.67689	4.31911	-3.44892	0.870187	0.512406	4.16448	8.48359	8.12581	0.966032	0.016842	0.0264152
Glomus_cubense	0.000115828	0.000849407	0	6.61731	0.011564	0.604501	0.0733579	-0.0115828	-0.0849407	0.00579868	-0.079142	-0.1525	0.140917	0.0559764	-0.0173815	0.0333295	0.892086	0.0146778
Didymella_urticicola	0.000312093	0.00193047	0.00114541	4.51828	0.0344539	0.604501	0.161838	0.083332	-0.0785058	0.0181876	-0.0603182	-0.222156	0.305488	0.226982	0.0651444	0.0274434	0.304688	0.344253
Epicoccum_nigrum	0	0.000167307	0	4.13456	0.0430605	0.604501	0.0167307	-3.29597e-18	-0.0167307	-0.00119259	-0.0179233	-0.0346541	0.0346541	0.0179233	0.00119259	0.0681486	1	0.0681486
Stachybotrys_chartarum	0	0.00248387	0.000688535	3.92895	0.0486953	0.604501	0.248387	0.0688535	-0.179534	0.00429391	-0.17524	-0.423627	0.492481	0.312947	0.0645595	0.0460338	0.737869	0.164142

## Sheet: README
标题	说明
Taxon	物种名称
Mean.In.*	各分组的平均值
Fvalue	F值
Pvalue	P值
FDR	校正之后的P值（BH方法校正后的P值）
组1-组2_diff	组1-组2 Tukey HSD检验,两组之间的观察值均值的差值。 注:组1、组2为示例名称，请以实际组名为准
组1-组2_lwr	组1-组2 Tukey HSD,差异区间的下限
组1-组2_upr	组1-组2 Tukey HSD,差异区间的上限
组1-组2_p.adj	组1-组2 Tukey HSD,多重校正后的P值
