# Supplementary material for: Years of sand fixation with Caragana korshinskii drive the enrichment of its rhizosphere functional microbes by accumulating soil N
Source: PeerJ journal article supplement (doi:10.7717/peerj.14271), 2022-11-01
Supplement: ASV-copies_of_bacteria_in_fall.xlsx [file ASV-copies_of_bacteria_in_fall.xlsx]

## Sheet: OTU-copies
#OTU ID	Ck18-1	Ck18-2	Ck18-3	Ck18-4	Ck18-5	Ck18-6	Ck12-1	Ck12-2	Ck12-3	Ck12-4	Ck12-5	Ck12-6	Ck6-1	Ck6-2	Ck6-3	Ck6-4	Ck6-5	OTUsize	Taxonomy	superkingdom	phylum	class	order	family	genus	species
ASV1	1420	1466	1074	1201	1678	1430	6188	3243	3608	3471	6011	3508	5982	6669	3351	3316	2665	56281	Bacteria{superkingdom}(99);Proteobacteria{phylum}(99);Gammaproteobacteria{class}(99);Pseudomonadales{order}(99);Pseudomonadaceae{family}(99);Pseudomonas{genus}(99);Unassigned{species}(0)	Bacteria	Proteobacteria	Gammaproteobacteria	Pseudomonadales	Pseudomonadaceae	Pseudomonas	Unassigned
ASV2	2263	1716	1408	4947	2440	2001	536	415	362	248	373	231	1248	1469	23	1503	3574	24757	Bacteria{superkingdom}(100);Actinobacteria{phylum}(100);Actinobacteria{class}(100);Actinomycetales{order}(100);Streptomycetaceae{family}(100);Streptomyces{genus}(100);Unassigned{species}(0)	Bacteria	Actinobacteria	Actinobacteria	Actinomycetales	Streptomycetaceae	Streptomyces	Unassigned
ASV3	3955	1258	2973	2692	3309	1770	2709	962	1824	3053	2695	4313	5460	1708	3458	3792	2114	48045	Bacteria{superkingdom}(97);Actinobacteria{phylum}(97);Actinobacteria{class}(97);Actinomycetales{order}(97);Micrococcaceae{family}(97);Arthrobacter{genus}(97);Unassigned{species}(0)	Bacteria	Actinobacteria	Actinobacteria	Actinomycetales	Micrococcaceae	Arthrobacter	Unassigned
ASV6	1748	867	1026	3245	2780	3694	417	22	128	209	490	59	185	360	104	1130	62	16526	Bacteria{superkingdom}(100);Actinobacteria{phylum}(100);Actinobacteria{class}(100);Actinomycetales{order}(100);Nocardioidaceae{family}(100);Kribbella{genus}(100);Unassigned{species}(0)	Bacteria	Actinobacteria	Actinobacteria	Actinomycetales	Nocardioidaceae	Kribbella	Unassigned
ASV7	978	915	941	972	1169	1060	2359	1172	1131	1398	2204	1120	2460	2244	1072	1041	919	23155	Bacteria{superkingdom}(98);Proteobacteria{phylum}(98);Alphaproteobacteria{class}(98);Rhizobiales{order}(98);Brucellaceae{family}(98);Ochrobactrum{genus}(98);Unassigned{species}(0)	Bacteria	Proteobacteria	Alphaproteobacteria	Rhizobiales	Brucellaceae	Ochrobactrum	Unassigned
ASV8	2741	694	976	1834	3316	342	969	1554	1322	3685	1721	3231	138	634	509	2235	1773	27674	Bacteria{superkingdom}(97);Actinobacteria{phylum}(97);Actinobacteria{class}(97);Actinomycetales{order}(97);Micrococcaceae{family}(97);Arthrobacter{genus}(97);Unassigned{species}(0)	Bacteria	Actinobacteria	Actinobacteria	Actinomycetales	Micrococcaceae	Arthrobacter	Unassigned
ASV9	2808	621	1664	5128	7359	1713	0	40	147	153	0	90	0	0	0	0	0	19723	Bacteria{superkingdom}(99);Actinobacteria{phylum}(99);Actinobacteria{class}(99);Actinomycetales{order}(99);Streptomycetaceae{family}(99);Streptomyces{genus}(99);Unassigned{species}(0)	Bacteria	Actinobacteria	Actinobacteria	Actinomycetales	Streptomycetaceae	Streptomyces	Unassigned
ASV10	532	372	185	2147	834	1272	273	47	273	183	173	323	300	117	566	224	221	8042	Bacteria{superkingdom}(83);Actinobacteria{phylum}(83);Actinobacteria{class}(83);Actinomycetales{order}(83);Pseudonocardiaceae{family}(83);Lechevalieria{genus}(83);Unassigned{species}(0)	Bacteria	Actinobacteria	Actinobacteria	Actinomycetales	Pseudonocardiaceae	Lechevalieria	Unassigned
ASV11	0	0	0	34	52	43	0	0	0	0	0	0	0	0	0	0	0	129	Bacteria{superkingdom}(99);Actinobacteria{phylum}(99);Actinobacteria{class}(99);Actinomycetales{order}(99);Streptomycetaceae{family}(99);Streptomyces{genus}(99);Unassigned{species}(0)	Bacteria	Actinobacteria	Actinobacteria	Actinomycetales	Streptomycetaceae	Streptomyces	Unassigned
ASV12	393	368	236	340	760	1507	421	0	16	158	103	0	227	9	0	18	36	4592	Bacteria{superkingdom}(100);Acidobacteria{phylum}(100);Acidobacteria_Gp4{class}(100);{order}(100);{family}(100);Gp4{genus}(100);Unassigned{species}(0)	Bacteria	Acidobacteria	Acidobacteria_Gp4			Gp4	Unassigned
ASV13	1644	2650	1901	850	3033	1192	870	877	1300	696	1572	554	513	521	1485	120	425	20203	Bacteria{superkingdom}(88);Chloroflexi{phylum}(88);Anaerolineae{class}(88);Anaerolineales{order}(88);Anaerolineaceae{family}(88);{genus}(88);uncultured_soil_bacterium{species}(88)	Bacteria	Chloroflexi	Anaerolineae	Anaerolineales	Anaerolineaceae		uncultured_soil_bacterium
ASV14	1450	47	801	1735	1553	899	60	230	373	933	312	819	378	544	1280	1398	512	13324	Bacteria{superkingdom}(100);Actinobacteria{phylum}(100);Actinobacteria{class}(100);Actinomycetales{order}(100);Microbacteriaceae{family}(100);Agromyces{genus}(100);Unassigned{species}(0)	Bacteria	Actinobacteria	Actinobacteria	Actinomycetales	Microbacteriaceae	Agromyces	Unassigned
ASV15	1731	0	558	1731	2617	2412	72	0	64	116	178	0	137	133	694	85	26	10554	Bacteria{superkingdom}(100);Actinobacteria{phylum}(100);Actinobacteria{class}(100);Actinomycetales{order}(100);Pseudonocardiaceae{family}(100);Amycolatopsis{genus}(100);Unassigned{species}(0)	Bacteria	Actinobacteria	Actinobacteria	Actinomycetales	Pseudonocardiaceae	Amycolatopsis	Unassigned
ASV16	1220	307	998	356	2725	977	135	35	117	17	48	0	119	0	0	26	87	7167	Bacteria{superkingdom}(99);Proteobacteria{phylum}(99);Alphaproteobacteria{class}(99);Rhizobiales{order}(99);Rhizobiaceae{family}(99);Rhizobium{genus}(99);Unassigned{species}(0)	Bacteria	Proteobacteria	Alphaproteobacteria	Rhizobiales	Rhizobiaceae	Rhizobium	Unassigned
ASV17	509	2216	1370	564	2345	3363	1037	85	219	0	207	23	1845	28	49	30	60	13950	Bacteria{superkingdom}(100);Proteobacteria{phylum}(100);Alphaproteobacteria{class}(100);Rhizobiales{order}(100);Phyllobacteriaceae{family}(100);Mesorhizobium{genus}(100);Unassigned{species}(0)	Bacteria	Proteobacteria	Alphaproteobacteria	Rhizobiales	Phyllobacteriaceae	Mesorhizobium	Unassigned
ASV18	505	0	186	1731	857	1102	0	0	0	15	0	0	0	8	0	0	0	4404	Bacteria{superkingdom}(100);Proteobacteria{phylum}(100);Gammaproteobacteria{class}(100);Xanthomonadales{order}(100);Xanthomonadaceae{family}(100);Pseudoxanthomonas{genus}(100);Unassigned{species}(0)	Bacteria	Proteobacteria	Gammaproteobacteria	Xanthomonadales	Xanthomonadaceae	Pseudoxanthomonas	Unassigned
ASV19	957	309	436	859	1636	1401	218	102	185	151	101	155	672	160	70	591	250	8253	Bacteria{superkingdom}(97);Actinobacteria{phylum}(97);Actinobacteria{class}(97);Actinomycetales{order}(97);Mycobacteriaceae{family}(97);Mycobacterium{genus}(97);Unassigned{species}(0)	Bacteria	Actinobacteria	Actinobacteria	Actinomycetales	Mycobacteriaceae	Mycobacterium	Unassigned
ASV20	1047	195	1177	1697	3008	1154	249	76	195	211	145	95	167	233	412	157	329	10547	Bacteria{superkingdom}(100);Actinobacteria{phylum}(100);Actinobacteria{class}(100);Actinomycetales{order}(100);Microbacteriaceae{family}(100);Microbacterium{genus}(100);Unassigned{species}(0)	Bacteria	Actinobacteria	Actinobacteria	Actinomycetales	Microbacteriaceae	Microbacterium	Unassigned
ASV21	880	817	240	922	364	739	172	367	262	980	307	767	325	1901	938	2994	233	13208	Bacteria{superkingdom}(99);Actinobacteria{phylum}(99);Actinobacteria{class}(99);Actinomycetales{order}(99);Nocardioidaceae{family}(99);Aeromicrobium{genus}(99);Unassigned{species}(0)	Bacteria	Actinobacteria	Actinobacteria	Actinomycetales	Nocardioidaceae	Aeromicrobium	Unassigned
ASV22	673	164	340	483	1303	490	587	807	358	572	867	663	1454	752	1080	325	795	11713	Bacteria{superkingdom}(99);Proteobacteria{phylum}(99);Alphaproteobacteria{class}(99);Rhizobiales{order}(99);Hyphomicrobiaceae{family}(99);Hyphomicrobium{genus}(99);Unassigned{species}(0)	Bacteria	Proteobacteria	Alphaproteobacteria	Rhizobiales	Hyphomicrobiaceae	Hyphomicrobium	Unassigned
ASV23	258	0	174	597	1353	1565	114	0	41	0	0	0	254	0	0	0	31	4387	Bacteria{superkingdom}(99);Proteobacteria{phylum}(99);Alphaproteobacteria{class}(99);Rhodospirillales{order}(99);Rhodospirillaceae{family}(99);Dongia{genus}(99);Unassigned{species}(0)	Bacteria	Proteobacteria	Alphaproteobacteria	Rhodospirillales	Rhodospirillaceae	Dongia	Unassigned
ASV24	3100	147	1942	0	12053	345	1342	208	0	251	38	0	0	0	0	0	0	19426	Bacteria{superkingdom}(100);Actinobacteria{phylum}(100);Actinobacteria{class}(100);Actinomycetales{order}(100);Streptomycetaceae{family}(100);Streptomyces{genus}(100);Unassigned{species}(0)	Bacteria	Actinobacteria	Actinobacteria	Actinomycetales	Streptomycetaceae	Streptomyces	Unassigned
ASV25	854	860	370	316	936	841	627	646	601	717	481	203	2220	147	318	192	397	10726	Bacteria{superkingdom}(97);Actinobacteria{phylum}(97);Actinobacteria{class}(97);Acidimicrobiales{order}(97);Acidimicrobineae_incertae_sedis{family}(97);Aciditerrimonas{genus}(97);uncultured_Acidimicrobiales_bacterium{species}(97)	Bacteria	Actinobacteria	Actinobacteria	Acidimicrobiales	Acidimicrobineae_incertae_sedis	Aciditerrimonas	uncultured_Acidimicrobiales_bacterium
ASV26	760	140	1177	245	808	917	1277	2474	1739	362	579	1860	1129	12	61	65	1839	15444	Bacteria{superkingdom}(100);{phylum}(100);{class}(100);{order}(100);{family}(100);{genus}(100);uncultured_Actinomyces_sp.{species}(100)	Bacteria						uncultured_Actinomyces_sp.
ASV27	395	77	273	386	1031	149	356	131	157	160	266	431	252	216	636	221	106	5243	Bacteria{superkingdom}(100);Actinobacteria{phylum}(100);Actinobacteria{class}(100);Actinomycetales{order}(100);Streptomycetaceae{family}(100);Streptomyces{genus}(100);Unassigned{species}(0)	Bacteria	Actinobacteria	Actinobacteria	Actinomycetales	Streptomycetaceae	Streptomyces	Unassigned
ASV28	759	153	359	731	2587	1136	90	92	121	98	36	0	103	0	71	0	137	6473	Bacteria{superkingdom}(99);Proteobacteria{phylum}(99);Alphaproteobacteria{class}(99);Rhizobiales{order}(99);{family}(99);{genus}(99);Unassigned{species}(0)	Bacteria	Proteobacteria	Alphaproteobacteria	Rhizobiales			Unassigned
ASV30	0	0	40	0	3672	2129	0	0	0	15	0	0	0	0	0	0	40	5896	Bacteria{superkingdom}(100);Bacteroidetes{phylum}(100);Sphingobacteriia{class}(100);Sphingobacteriales{order}(100);Chitinophagaceae{family}(100);Chitinophaga{genus}(100);Unassigned{species}(0)	Bacteria	Bacteroidetes	Sphingobacteriia	Sphingobacteriales	Chitinophagaceae	Chitinophaga	Unassigned
ASV31	679	79	462	1036	1097	772	46	46	43	57	58	148	128	88	97	64	93	4993	Bacteria{superkingdom}(100);Proteobacteria{phylum}(100);Alphaproteobacteria{class}(100);Rhizobiales{order}(100);Rhizobiaceae{family}(100);Ensifer{genus}(100);Unassigned{species}(0)	Bacteria	Proteobacteria	Alphaproteobacteria	Rhizobiales	Rhizobiaceae	Ensifer	Unassigned
ASV32	840	573	205	426	483	380	197	680	310	814	180	657	205	304	0	171	323	6748	Bacteria{superkingdom}(97);Proteobacteria{phylum}(97);Alphaproteobacteria{class}(97);Rhizobiales{order}(97);Rhodobiaceae{family}(97);{genus}(97);Unassigned{species}(0)	Bacteria	Proteobacteria	Alphaproteobacteria	Rhizobiales	Rhodobiaceae		Unassigned
ASV33	31	427	0	0	0	0	22	197	88	252	39	224	0	0	0	0	0	1280	Bacteria{superkingdom}(100);Acidobacteria{phylum}(100);Acidobacteria_Gp4{class}(100);{order}(100);{family}(100);Gp4{genus}(100);Unassigned{species}(0)	Bacteria	Acidobacteria	Acidobacteria_Gp4			Gp4	Unassigned
ASV34	352	2476	39	300	245	49	0	325	213	493	83	396	24	92	41	997	57	6182	Bacteria{superkingdom}(99);Chloroflexi{phylum}(99);Anaerolineae{class}(99);Anaerolineales{order}(99);Anaerolineaceae{family}(99);{genus}(99);uncultured_soil_bacterium{species}(99)	Bacteria	Chloroflexi	Anaerolineae	Anaerolineales	Anaerolineaceae		uncultured_soil_bacterium
ASV35	23	114	32	0	250	64	19	34	144	32	83	42	105	15	29	138	100	1224	Bacteria{superkingdom}(100);Actinobacteria{phylum}(100);Actinobacteria{class}(100);Actinomycetales{order}(100);Pseudonocardiaceae{family}(100);Lentzea{genus}(100);Unassigned{species}(0)	Bacteria	Actinobacteria	Actinobacteria	Actinomycetales	Pseudonocardiaceae	Lentzea	Unassigned
ASV36	292	1817	102	25	319	363	0	0	20	64	0	0	0	0	0	56	0	3058	Bacteria{superkingdom}(85);Acidobacteria{phylum}(85);Acidobacteria_Gp4{class}(85);{order}(85);{family}(85);Gp4{genus}(85);uncultured_Rhodopseudomonas_sp.{species}(85)	Bacteria	Acidobacteria	Acidobacteria_Gp4			Gp4	uncultured_Rhodopseudomonas_sp.
ASV37	506	157	858	521	5209	734	46	55	190	190	0	35	157	65	56	129	109	9017	Bacteria{superkingdom}(100);Proteobacteria{phylum}(100);Alphaproteobacteria{class}(100);Sphingomonadales{order}(100);Sphingomonadaceae{family}(100);Sphingomonas{genus}(100);Unassigned{species}(0)	Bacteria	Proteobacteria	Alphaproteobacteria	Sphingomonadales	Sphingomonadaceae	Sphingomonas	Unassigned
ASV38	62	1435	32	0	64	0	1033	841	418	434	27	529	0	25	21	961	36	5918	Bacteria{superkingdom}(100);Acidobacteria{phylum}(100);Acidobacteria_Gp4{class}(100);{order}(100);{family}(100);Gp4{genus}(100);uncultured_Candidatus_Chloracidobacterium_sp.{species}(100)	Bacteria	Acidobacteria	Acidobacteria_Gp4			Gp4	uncultured_Candidatus_Chloracidobacterium_sp.
ASV39	214	164	152	1062	1005	691	109	178	296	1048	142	293	228	354	618	445	0	6999	Bacteria{superkingdom}(100);Nitrospirae{phylum}(100);Nitrospira{class}(100);Nitrospirales{order}(100);Nitrospiraceae{family}(100);Nitrospira{genus}(100);Unassigned{species}(0)	Bacteria	Nitrospirae	Nitrospira	Nitrospirales	Nitrospiraceae	Nitrospira	Unassigned
ASV40	1040	77	1411	1122	410	2483	193	0	171	81	0	98	0	0	0	0	0	7086	Bacteria{superkingdom}(91);Actinobacteria{phylum}(91);Actinobacteria{class}(91);Actinomycetales{order}(91);Pseudonocardiaceae{family}(91);Actinophytocola{genus}(91);uncultured_bacterium{species}(91)	Bacteria	Actinobacteria	Actinobacteria	Actinomycetales	Pseudonocardiaceae	Actinophytocola	uncultured_bacterium
ASV41	544	207	228	582	1624	1026	199	92	135	176	112	105	128	74	108	119	107	5566	Bacteria{superkingdom}(100);Acidobacteria{phylum}(100);Acidobacteria_Gp6{class}(100);{order}(100);{family}(100);Gp6{genus}(100);Unassigned{species}(0)	Bacteria	Acidobacteria	Acidobacteria_Gp6			Gp6	Unassigned
ASV42	1245	0	82	2116	407	1056	17	0	0	119	664	101	0	0	0	0	0	5807	Bacteria{superkingdom}(99);Actinobacteria{phylum}(99);Actinobacteria{class}(99);Actinomycetales{order}(99);Streptomycetaceae{family}(99);Streptomyces{genus}(99);Unassigned{species}(0)	Bacteria	Actinobacteria	Actinobacteria	Actinomycetales	Streptomycetaceae	Streptomyces	Unassigned
ASV43	1677	293	688	310	3688	961	376	98	433	394	380	107	222	58	369	42	187	10283	Bacteria{superkingdom}(100);Proteobacteria{phylum}(100);Gammaproteobacteria{class}(100);Xanthomonadales{order}(100);Sinobacteraceae{family}(100);Steroidobacter{genus}(100);Unassigned{species}(0)	Bacteria	Proteobacteria	Gammaproteobacteria	Xanthomonadales	Sinobacteraceae	Steroidobacter	Unassigned
ASV44	188	564	356	254	524	400	499	616	598	684	354	595	575	664	1138	678	798	9485	Bacteria{superkingdom}(100);Acidobacteria{phylum}(100);Acidobacteria_Gp16{class}(100);{order}(100);{family}(100);Gp16{genus}(100);Unassigned{species}(0)	Bacteria	Acidobacteria	Acidobacteria_Gp16			Gp16	Unassigned
ASV45	463	456	175	324	951	596	65	44	88	52	55	89	231	108	73	109	114	3993	Bacteria{superkingdom}(94);Proteobacteria{phylum}(94);Alphaproteobacteria{class}(94);Rhizobiales{order}(94);Bradyrhizobiaceae{family}(94);Bradyrhizobium{genus}(94);Unassigned{species}(0)	Bacteria	Proteobacteria	Alphaproteobacteria	Rhizobiales	Bradyrhizobiaceae	Bradyrhizobium	Unassigned
ASV46	239	189	99	293	445	750	0	24	0	53	0	0	0	44	0	75	0	2211	Bacteria{superkingdom}(91);Proteobacteria{phylum}(91);Gammaproteobacteria{class}(91);Xanthomonadales{order}(91);Sinobacteraceae{family}(91);Steroidobacter{genus}(91);Unassigned{species}(0)	Bacteria	Proteobacteria	Gammaproteobacteria	Xanthomonadales	Sinobacteraceae	Steroidobacter	Unassigned
ASV47	558	0	181	136	1327	599	0	0	0	0	155	21	1154	0	0	0	10	4141	Bacteria{superkingdom}(98);Acidobacteria{phylum}(98);Acidobacteria_Gp7{class}(98);{order}(98);{family}(98);Gp7{genus}(98);uncultured_Anaeromyxobacter_sp.{species}(98)	Bacteria	Acidobacteria	Acidobacteria_Gp7			Gp7	uncultured_Anaeromyxobacter_sp.
ASV48	800	1489	439	190	1207	428	253	459	362	141	106	152	12	4	0	59	65	6166	Bacteria{superkingdom}(84);Nitrospirae{phylum}(84);Nitrospira{class}(84);Nitrospirales{order}(84);Nitrospiraceae{family}(84);Nitrospira{genus}(84);uncultured_soil_bacterium{species}(84)	Bacteria	Nitrospirae	Nitrospira	Nitrospirales	Nitrospiraceae	Nitrospira	uncultured_soil_bacterium
ASV49	836	0	571	599	2206	219	73	0	36	25	14	0	22	32	33	28	45	4739	Bacteria{superkingdom}(100);Proteobacteria{phylum}(100);Betaproteobacteria{class}(100);Methylophilales{order}(100);Methylophilaceae{family}(100);Unassigned{genus}(0);Unassigned{species}(0)	Bacteria	Proteobacteria	Betaproteobacteria	Methylophilales	Methylophilaceae	Unassigned	Unassigned
ASV50	216	84	221	86	598	1378	233	45	97	673	215	63	2683	207	0	23	89	6911	Bacteria{superkingdom}(98);Nitrospirae{phylum}(98);Nitrospira{class}(98);Nitrospirales{order}(98);Nitrospiraceae{family}(98);Nitrospira{genus}(98);uncultured_organism{species}(98)	Bacteria	Nitrospirae	Nitrospira	Nitrospirales	Nitrospiraceae	Nitrospira	uncultured_organism
ASV52	558	125	304	454	388	1197	19	26	14	88	27	91	297	1138	188	1177	206	6297	Bacteria{superkingdom}(100);Actinobacteria{phylum}(100);Actinobacteria{class}(100);Actinomycetales{order}(100);Nocardioidaceae{family}(100);Nocardioides{genus}(100);Unassigned{species}(0)	Bacteria	Actinobacteria	Actinobacteria	Actinomycetales	Nocardioidaceae	Nocardioides	Unassigned
ASV53	148	305	16	88	140	46	17	14	15	185	67	201	34	404	872	223	1555	4330	Bacteria{superkingdom}(100);Acidobacteria{phylum}(100);Acidobacteria_Gp4{class}(100);{order}(100);{family}(100);Gp4{genus}(100);Unassigned{species}(0)	Bacteria	Acidobacteria	Acidobacteria_Gp4			Gp4	Unassigned
ASV54	846	174	362	620	2443	503	69	0	85	0	80	91	126	16	0	18	43	5476	Bacteria{superkingdom}(89);Proteobacteria{phylum}(89);Betaproteobacteria{class}(89);Burkholderiales{order}(89);Comamonadaceae{family}(89);Variovorax{genus}(89);Unassigned{species}(0)	Bacteria	Proteobacteria	Betaproteobacteria	Burkholderiales	Comamonadaceae	Variovorax	Unassigned
ASV55	594	329	117	462	155	357	41	309	306	293	80	261	203	814	425	1085	165	5996	Bacteria{superkingdom}(100);Actinobacteria{phylum}(100);Actinobacteria{class}(100);Actinomycetales{order}(100);Nocardioidaceae{family}(100);Nocardioides{genus}(100);Unassigned{species}(0)	Bacteria	Actinobacteria	Actinobacteria	Actinomycetales	Nocardioidaceae	Nocardioides	Unassigned
ASV56	0	0	0	413	0	47	0	0	0	93	0	0	0	0	0	0	0	553	Bacteria{superkingdom}(100);Actinobacteria{phylum}(100);Actinobacteria{class}(100);Actinomycetales{order}(100);Streptomycetaceae{family}(100);Streptomyces{genus}(100);Unassigned{species}(0)	Bacteria	Actinobacteria	Actinobacteria	Actinomycetales	Streptomycetaceae	Streptomyces	Unassigned
ASV57	412	415	565	366	282	354	1204	454	545	860	305	204	493	56	335	162	201	7213	Bacteria{superkingdom}(99);Actinobacteria{phylum}(99);Actinobacteria{class}(99);Acidimicrobiales{order}(99);Acidimicrobineae_incertae_sedis{family}(99);Aciditerrimonas{genus}(99);uncultured_Acidimicrobiales_bacterium{species}(99)	Bacteria	Actinobacteria	Actinobacteria	Acidimicrobiales	Acidimicrobineae_incertae_sedis	Aciditerrimonas	uncultured_Acidimicrobiales_bacterium
ASV58	747	161	130	462	871	508	94	272	94	97	80	74	411	391	211	71	345	5019	Bacteria{superkingdom}(100);Proteobacteria{phylum}(100);Alphaproteobacteria{class}(100);Rhizobiales{order}(100);Unassigned{family}(0);Unassigned{genus}(0);Unassigned{species}(0)	Bacteria	Proteobacteria	Alphaproteobacteria	Rhizobiales	Unassigned	Unassigned	Unassigned
ASV60	719	713	697	1265	1971	1130	169	55	0	140	190	52	255	70	57	0	14	7497	Bacteria{superkingdom}(100);Proteobacteria{phylum}(100);Gammaproteobacteria{class}(100);Xanthomonadales{order}(100);Sinobacteraceae{family}(100);Steroidobacter{genus}(100);Unassigned{species}(0)	Bacteria	Proteobacteria	Gammaproteobacteria	Xanthomonadales	Sinobacteraceae	Steroidobacter	Unassigned
ASV61	127	573	108	145	125	72	244	151	210	152	283	435	1884	1262	599	650	158	7178	Bacteria{superkingdom}(92);Actinobacteria{phylum}(92);Actinobacteria{class}(92);Solirubrobacterales{order}(92);{family}(92);{genus}(92);Unassigned{species}(0)	Bacteria	Actinobacteria	Actinobacteria	Solirubrobacterales			Unassigned
ASV62	381	558	398	242	1094	796	291	280	242	229	261	447	175	0	474	239	115	6222	Bacteria{superkingdom}(99);Chloroflexi{phylum}(99);Anaerolineae{class}(99);Anaerolineales{order}(99);Anaerolineaceae{family}(99);{genus}(99);uncultured_soil_bacterium{species}(99)	Bacteria	Chloroflexi	Anaerolineae	Anaerolineales	Anaerolineaceae		uncultured_soil_bacterium
ASV63	0	0	0	0	0	0	0	0	0	40	0	0	0	0	0	0	0	40	Bacteria{superkingdom}(98);Acidobacteria{phylum}(98);Acidobacteria_Gp4{class}(98);{order}(98);{family}(98);Gp4{genus}(98);uncultured_actinobacterium{species}(98)	Bacteria	Acidobacteria	Acidobacteria_Gp4			Gp4	uncultured_actinobacterium
ASV64	505	228	264	329	1785	288	67	34	44	67	50	141	48	132	197	141	65	4385	Bacteria{superkingdom}(100);Proteobacteria{phylum}(100);Alphaproteobacteria{class}(100);Rhizobiales{order}(100);Rhizobiaceae{family}(100);Unassigned{genus}(0);Unassigned{species}(0)	Bacteria	Proteobacteria	Alphaproteobacteria	Rhizobiales	Rhizobiaceae	Unassigned	Unassigned
ASV65	149	681	125	283	290	152	517	371	504	494	349	427	259	67	64	276	177	5185	Bacteria{superkingdom}(100);Acidobacteria{phylum}(100);Acidobacteria_Gp6{class}(100);{order}(100);{family}(100);Gp6{genus}(100);Unassigned{species}(0)	Bacteria	Acidobacteria	Acidobacteria_Gp6			Gp6	Unassigned
ASV66	478	193	926	1654	1824	961	10	0	116	0	15	0	27	0	0	29	203	6436	Bacteria{superkingdom}(100);Actinobacteria{phylum}(100);Actinobacteria{class}(100);Actinomycetales{order}(100);Pseudonocardiaceae{family}(100);Pseudonocardia{genus}(100);Unassigned{species}(0)	Bacteria	Actinobacteria	Actinobacteria	Actinomycetales	Pseudonocardiaceae	Pseudonocardia	Unassigned
ASV67	230	0	87	743	842	498	0	0	0	0	21	0	242	0	0	0	0	2663	Bacteria{superkingdom}(100);Bacteroidetes{phylum}(100);Sphingobacteriia{class}(100);Sphingobacteriales{order}(100);Chitinophagaceae{family}(100);Chitinophaga{genus}(100);Unassigned{species}(0)	Bacteria	Bacteroidetes	Sphingobacteriia	Sphingobacteriales	Chitinophagaceae	Chitinophaga	Unassigned
ASV68	629	291	87	67	3200	433	8	127	416	0	56	0	139	0	0	17	89	5559	Bacteria{superkingdom}(98);Bacteroidetes{phylum}(98);Sphingobacteriia{class}(98);Sphingobacteriales{order}(98);Chitinophagaceae{family}(98);Chitinophaga{genus}(98);Chitinophaga_japonensis{species}(98)	Bacteria	Bacteroidetes	Sphingobacteriia	Sphingobacteriales	Chitinophagaceae	Chitinophaga	Chitinophaga_japonensis
ASV69	434	151	145	332	431	220	0	16	59	199	63	104	113	232	184	233	137	3053	Bacteria{superkingdom}(100);Proteobacteria{phylum}(100);Alphaproteobacteria{class}(100);Rhizobiales{order}(100);Methylobacteriaceae{family}(100);Microvirga{genus}(100);Unassigned{species}(0)	Bacteria	Proteobacteria	Alphaproteobacteria	Rhizobiales	Methylobacteriaceae	Microvirga	Unassigned
ASV70	119	0	93	53	48	39	141	2531	5928	376	200	1010	303	40	0	0	358	11239	Bacteria{superkingdom}(100);Acidobacteria{phylum}(100);Acidobacteria_Gp4{class}(100);{order}(100);{family}(100);Gp4{genus}(100);Unassigned{species}(0)	Bacteria	Acidobacteria	Acidobacteria_Gp4			Gp4	Unassigned
ASV71	0	74	0	0	0	0	0	0	0	14	0	0	0	6	0	0	0	94	Bacteria{superkingdom}(100);Acidobacteria{phylum}(100);Acidobacteria_Gp4{class}(100);{order}(100);{family}(100);Gp4{genus}(100);uncultured_actinobacterium{species}(100)	Bacteria	Acidobacteria	Acidobacteria_Gp4			Gp4	uncultured_actinobacterium
ASV72	412	0	361	613	3284	278	19	50	0	0	82	0	410	51	10	41	66	5677	Bacteria{superkingdom}(80);Bacteroidetes{phylum}(80);Sphingobacteriia{class}(80);Sphingobacteriales{order}(80);Chitinophagaceae{family}(80);Chitinophaga{genus}(80);uncultured_bacterium{species}(80)	Bacteria	Bacteroidetes	Sphingobacteriia	Sphingobacteriales	Chitinophagaceae	Chitinophaga	uncultured_bacterium
ASV73	534	0	569	663	772	478	36	0	48	46	24	26	47	209	91	354	0	3897	Bacteria{superkingdom}(100);Actinobacteria{phylum}(100);Actinobacteria{class}(100);Actinomycetales{order}(100);Nocardioidaceae{family}(100);Nocardioides{genus}(100);Unassigned{species}(0)	Bacteria	Actinobacteria	Actinobacteria	Actinomycetales	Nocardioidaceae	Nocardioides	Unassigned
ASV74	0	70	24	29	57	35	0	0	0	0	0	503	0	34	110	22	0	884	Bacteria{superkingdom}(99);Proteobacteria{phylum}(99);Betaproteobacteria{class}(99);Burkholderiales{order}(99);Oxalobacteraceae{family}(99);Massilia{genus}(99);Unassigned{species}(0)	Bacteria	Proteobacteria	Betaproteobacteria	Burkholderiales	Oxalobacteraceae	Massilia	Unassigned
ASV75	802	53	373	500	502	619	70	17	164	48	78	70	44	217	283	187	103	4130	Bacteria{superkingdom}(100);Actinobacteria{phylum}(100);Actinobacteria{class}(100);Actinomycetales{order}(100);Nocardioidaceae{family}(100);Nocardioides{genus}(100);Unassigned{species}(0)	Bacteria	Actinobacteria	Actinobacteria	Actinomycetales	Nocardioidaceae	Nocardioides	Unassigned
ASV76	198	123	187	153	412	642	266	94	108	101	120	52	177	28	36	26	178	2901	Bacteria{superkingdom}(100);Proteobacteria{phylum}(100);Alphaproteobacteria{class}(100);Rhodospirillales{order}(100);{family}(100);Reyranella{genus}(100);Unassigned{species}(0)	Bacteria	Proteobacteria	Alphaproteobacteria	Rhodospirillales		Reyranella	Unassigned
ASV78	808	311	310	249	445	772	49	370	138	284	64	247	191	0	41	245	390	4914	Bacteria{superkingdom}(100);Actinobacteria{phylum}(100);Actinobacteria{class}(100);Actinomycetales{order}(100);Nocardioidaceae{family}(100);Nocardioides{genus}(100);Unassigned{species}(0)	Bacteria	Actinobacteria	Actinobacteria	Actinomycetales	Nocardioidaceae	Nocardioides	Unassigned
ASV79	261	106	144	95	276	195	1059	692	860	577	275	575	119	200	580	382	410	6806	Bacteria{superkingdom}(100);Acidobacteria{phylum}(100);Acidobacteria_Gp6{class}(100);{order}(100);{family}(100);Gp6{genus}(100);Unassigned{species}(0)	Bacteria	Acidobacteria	Acidobacteria_Gp6			Gp6	Unassigned
ASV80	439	19	114	387	2700	196	63	37	61	0	0	0	116	0	9	13	96	4250	Bacteria{superkingdom}(100);Proteobacteria{phylum}(100);Gammaproteobacteria{class}(100);Xanthomonadales{order}(100);Xanthomonadaceae{family}(100);Pseudoxanthomonas{genus}(100);Unassigned{species}(0)	Bacteria	Proteobacteria	Gammaproteobacteria	Xanthomonadales	Xanthomonadaceae	Pseudoxanthomonas	Unassigned
ASV81	124	222	165	447	2580	998	58	47	24	43	58	2	591	86	3	45	130	5623	Bacteria{superkingdom}(100);Proteobacteria{phylum}(100);Gammaproteobacteria{class}(100);Xanthomonadales{order}(100);Sinobacteraceae{family}(100);Steroidobacter{genus}(100);Unassigned{species}(0)	Bacteria	Proteobacteria	Gammaproteobacteria	Xanthomonadales	Sinobacteraceae	Steroidobacter	Unassigned
ASV82	119	952	27	87	69	42	59	25	79	361	180	52	0	103	23	19	222	2419	Bacteria{superkingdom}(83);Acidobacteria{phylum}(83);Acidobacteria_Gp4{class}(83);{order}(83);{family}(83);Gp4{genus}(83);Acidobacterium_sp._Ac_12_G8{species}(83)	Bacteria	Acidobacteria	Acidobacteria_Gp4			Gp4	Acidobacterium_sp._Ac_12_G8
ASV83	276	103	379	233	682	115	304	45	86	67	85	45	18	25	11	22	81	2577	Bacteria{superkingdom}(100);Proteobacteria{phylum}(100);Gammaproteobacteria{class}(100);Xanthomonadales{order}(100);Sinobacteraceae{family}(100);Steroidobacter{genus}(100);Unassigned{species}(0)	Bacteria	Proteobacteria	Gammaproteobacteria	Xanthomonadales	Sinobacteraceae	Steroidobacter	Unassigned
ASV84	249	90	114	98	922	363	36	0	218	63	30	13	70	21	0	0	100	2387	Bacteria{superkingdom}(83);Bacteroidetes{phylum}(83);Sphingobacteriia{class}(83);Sphingobacteriales{order}(83);Chitinophagaceae{family}(83);{genus}(83);Unassigned{species}(0)	Bacteria	Bacteroidetes	Sphingobacteriia	Sphingobacteriales	Chitinophagaceae		Unassigned
ASV85	208	261	130	295	1100	516	0	0	768	500	67	41	236	21	0	0	11	4154	Bacteria{superkingdom}(100);Acidobacteria{phylum}(100);Acidobacteria_Gp7{class}(100);{order}(100);{family}(100);Gp7{genus}(100);Unassigned{species}(0)	Bacteria	Acidobacteria	Acidobacteria_Gp7			Gp7	Unassigned
ASV86	0	0	0	63	0	68	0	0	0	0	0	0	0	0	0	0	0	131	Bacteria{superkingdom}(90);Proteobacteria{phylum}(90);Gammaproteobacteria{class}(90);Xanthomonadales{order}(90);Sinobacteraceae{family}(90);Steroidobacter{genus}(90);uncultured_gamma_proteobacterium{species}(90)	Bacteria	Proteobacteria	Gammaproteobacteria	Xanthomonadales	Sinobacteraceae	Steroidobacter	uncultured_gamma_proteobacterium
ASV87	191	0	0	91	140	42	0	156	333	366	103	159	211	91	0	0	52	1935	Bacteria{superkingdom}(100);Acidobacteria{phylum}(100);Acidobacteria_Gp4{class}(100);{order}(100);{family}(100);Gp4{genus}(100);Unassigned{species}(0)	Bacteria	Acidobacteria	Acidobacteria_Gp4			Gp4	Unassigned
ASV88	161	149	651	198	590	219	574	202	317	210	457	192	1005	441	756	544	360	7026	Bacteria{superkingdom}(98);Actinobacteria{phylum}(98);Actinobacteria{class}(98);Acidimicrobiales{order}(98);Acidimicrobineae_incertae_sedis{family}(98);Aciditerrimonas{genus}(98);uncultured_Acidimicrobiales_bacterium{species}(98)	Bacteria	Actinobacteria	Actinobacteria	Acidimicrobiales	Acidimicrobineae_incertae_sedis	Aciditerrimonas	uncultured_Acidimicrobiales_bacterium
ASV89	180	193	90	133	196	451	247	287	88	93	155	95	553	141	149	0	109	3160	Bacteria{superkingdom}(99);Acidobacteria{phylum}(99);Acidobacteria_Gp6{class}(99);{order}(99);{family}(99);Gp6{genus}(99);Unassigned{species}(0)	Bacteria	Acidobacteria	Acidobacteria_Gp6			Gp6	Unassigned
ASV90	361	345	105	293	508	456	70	52	95	87	83	58	119	121	103	145	119	3120	Bacteria{superkingdom}(98);Proteobacteria{phylum}(98);Alphaproteobacteria{class}(98);Rhizobiales{order}(98);Bradyrhizobiaceae{family}(98);{genus}(98);Unassigned{species}(0)	Bacteria	Proteobacteria	Alphaproteobacteria	Rhizobiales	Bradyrhizobiaceae		Unassigned
ASV91	134	516	154	67	253	334	292	114	90	0	109	25	48	0	0	0	54	2190	Bacteria{superkingdom}(100);Acidobacteria{phylum}(100);Acidobacteria_Gp6{class}(100);{order}(100);{family}(100);Gp6{genus}(100);Unassigned{species}(0)	Bacteria	Acidobacteria	Acidobacteria_Gp6			Gp6	Unassigned
ASV92	2606	0	220	56	1022	23	554	38	723	387	699	11	691	54	0	0	11	7095	Bacteria{superkingdom}(96);Firmicutes{phylum}(96);Bacilli{class}(96);Bacillales{order}(96);Bacillaceae_1{family}(96);Bacillus{genus}(96);Unassigned{species}(0)	Bacteria	Firmicutes	Bacilli	Bacillales	Bacillaceae_1	Bacillus	Unassigned
ASV93	0	0	119	655	0	0	88	0	71	98	0	0	0	0	0	0	0	1031	Bacteria{superkingdom}(100);Actinobacteria{phylum}(100);Actinobacteria{class}(100);Actinomycetales{order}(100);Streptomycetaceae{family}(100);Streptomyces{genus}(100);Unassigned{species}(0)	Bacteria	Actinobacteria	Actinobacteria	Actinomycetales	Streptomycetaceae	Streptomyces	Unassigned
ASV94	0	61	99	1744	2031	0	0	42	79	78	0	81	0	0	0	5	0	4220	Bacteria{superkingdom}(92);Actinobacteria{phylum}(92);Actinobacteria{class}(92);Actinomycetales{order}(92);Pseudonocardiaceae{family}(92);Actinophytocola{genus}(92);uncultured_bacterium{species}(92)	Bacteria	Actinobacteria	Actinobacteria	Actinomycetales	Pseudonocardiaceae	Actinophytocola	uncultured_bacterium
ASV95	175	90	317	40	271	782	182	17	26	12	2	0	0	0	0	3	0	1917	Bacteria{superkingdom}(100);Acidobacteria{phylum}(100);Acidobacteria_Gp4{class}(100);{order}(100);{family}(100);Gp4{genus}(100);Unassigned{species}(0)	Bacteria	Acidobacteria	Acidobacteria_Gp4			Gp4	Unassigned
ASV97	1145	212	519	1077	1684	811	44	0	100	77	42	0	14	24	47	0	151	5947	Bacteria{superkingdom}(89);Proteobacteria{phylum}(89);Alphaproteobacteria{class}(89);Sphingomonadales{order}(89);Sphingomonadaceae{family}(89);Novosphingobium{genus}(89);Unassigned{species}(0)	Bacteria	Proteobacteria	Alphaproteobacteria	Sphingomonadales	Sphingomonadaceae	Novosphingobium	Unassigned
ASV98	201	0	356	238	377	478	0	36	0	0	23	0	0	32	0	0	46	1787	Bacteria{superkingdom}(94);Bacteroidetes{phylum}(94);Sphingobacteriia{class}(94);Sphingobacteriales{order}(94);Chitinophagaceae{family}(94);{genus}(94);uncultured_Cytophaga_sp.{species}(94)	Bacteria	Bacteroidetes	Sphingobacteriia	Sphingobacteriales	Chitinophagaceae		uncultured_Cytophaga_sp.
ASV99	508	61	228	475	216	569	488	134	224	8	90	122	225	119	15	484	305	4271	Bacteria{superkingdom}(100);Chloroflexi{phylum}(100);Thermomicrobia{class}(100);Unassigned{order}(0);Unassigned{family}(0);Unassigned{genus}(0);Unassigned{species}(0)	Bacteria	Chloroflexi	Thermomicrobia	Unassigned	Unassigned	Unassigned	Unassigned
ASV100	162	112	49	251	248	258	112	0	51	46	44	0	39	25	0	0	33	1430	Bacteria{superkingdom}(100);Actinobacteria{phylum}(100);Actinobacteria{class}(100);Actinomycetales{order}(100);Micromonosporaceae{family}(100);Unassigned{genus}(0);Unassigned{species}(0)	Bacteria	Actinobacteria	Actinobacteria	Actinomycetales	Micromonosporaceae	Unassigned	Unassigned
ASV101	0	0	80	434	0	0	90	221	0	923	471	315	0	316	924	1019	0	4793	Bacteria{superkingdom}(97);Actinobacteria{phylum}(97);Actinobacteria{class}(97);Actinomycetales{order}(97);Micrococcaceae{family}(97);Arthrobacter{genus}(97);Unassigned{species}(0)	Bacteria	Actinobacteria	Actinobacteria	Actinomycetales	Micrococcaceae	Arthrobacter	Unassigned
ASV102	364	24	88	195	626	252	23	0	15	37	0	48	45	14	42	23	28	1824	Bacteria{superkingdom}(92);Proteobacteria{phylum}(92);Alphaproteobacteria{class}(92);Rhizobiales{order}(92);Rhizobiaceae{family}(92);Neorhizobium{genus}(92);Unassigned{species}(0)	Bacteria	Proteobacteria	Alphaproteobacteria	Rhizobiales	Rhizobiaceae	Neorhizobium	Unassigned
ASV103	154	0	150	117	1627	74	0	0	45	48	0	0	0	0	7	0	4	2226	Bacteria{superkingdom}(98);Bacteroidetes{phylum}(98);Cytophagia{class}(98);Cytophagales{order}(98);Cytophagaceae{family}(98);Dyadobacter{genus}(98);Dyadobacter_fermentans{species}(98)	Bacteria	Bacteroidetes	Cytophagia	Cytophagales	Cytophagaceae	Dyadobacter	Dyadobacter_fermentans
ASV104	0	0	0	0	0	0	0	0	49	0	0	107	0	194	171	59	0	580	Bacteria{superkingdom}(100);Actinobacteria{phylum}(100);Actinobacteria{class}(100);Actinomycetales{order}(100);Streptomycetaceae{family}(100);Streptomyces{genus}(100);Unassigned{species}(0)	Bacteria	Actinobacteria	Actinobacteria	Actinomycetales	Streptomycetaceae	Streptomyces	Unassigned
ASV105	141	0	176	316	538	867	81	0	0	0	35	0	82	0	0	0	39	2275	Bacteria{superkingdom}(100);Acidobacteria{phylum}(100);Acidobacteria_Gp6{class}(100);{order}(100);{family}(100);Gp6{genus}(100);Unassigned{species}(0)	Bacteria	Acidobacteria	Acidobacteria_Gp6			Gp6	Unassigned
ASV106	385	483	265	0	1989	342	73	0	105	161	99	34	479	18	17	26	0	4476	Bacteria{superkingdom}(100);Actinobacteria{phylum}(100);Actinobacteria{class}(100);Actinomycetales{order}(100);Streptomycetaceae{family}(100);Streptomyces{genus}(100);Unassigned{species}(0)	Bacteria	Actinobacteria	Actinobacteria	Actinomycetales	Streptomycetaceae	Streptomyces	Unassigned
ASV108	39	0	347	31	2829	308	198	161	408	46	252	654	1301	170	6	0	356	7106	Bacteria{superkingdom}(100);Proteobacteria{phylum}(100);Alphaproteobacteria{class}(100);Rhizobiales{order}(100);Methylobacteriaceae{family}(100);Microvirga{genus}(100);Unassigned{species}(0)	Bacteria	Proteobacteria	Alphaproteobacteria	Rhizobiales	Methylobacteriaceae	Microvirga	Unassigned
ASV109	235	260	0	0	93	92	0	0	0	0	0	0	17	0	0	0	0	697	Bacteria{superkingdom}(94);Acidobacteria{phylum}(94);Acidobacteria_Gp4{class}(94);{order}(94);{family}(94);Gp4{genus}(94);uncultured_Rhodopseudomonas_sp.{species}(94)	Bacteria	Acidobacteria	Acidobacteria_Gp4			Gp4	uncultured_Rhodopseudomonas_sp.
ASV110	0	407	39	0	120	0	207	54	849	203	295	73	203	271	327	269	418	3735	Bacteria{superkingdom}(86);Bacteroidetes{phylum}(86);Sphingobacteriia{class}(86);Sphingobacteriales{order}(86);Chitinophagaceae{family}(86);{genus}(86);Unassigned{species}(0)	Bacteria	Bacteroidetes	Sphingobacteriia	Sphingobacteriales	Chitinophagaceae		Unassigned
ASV111	178	41	129	179	388	210	279	590	577	184	702	282	372	170	365	45	122	4813	Bacteria{superkingdom}(99);Chloroflexi{phylum}(99);Unassigned{class}(0);Unassigned{order}(0);Unassigned{family}(0);Unassigned{genus}(0);Unassigned{species}(0)	Bacteria	Chloroflexi	Unassigned	Unassigned	Unassigned	Unassigned	Unassigned
ASV112	0	275	36	0	0	0	0	2232	764	467	0	1259	0	0	0	0	0	5033	Bacteria{superkingdom}(100);Acidobacteria{phylum}(100);Acidobacteria_Gp4{class}(100);{order}(100);{family}(100);Gp4{genus}(100);Unassigned{species}(0)	Bacteria	Acidobacteria	Acidobacteria_Gp4			Gp4	Unassigned
ASV115	148	119	106	98	178	140	339	108	126	171	362	114	354	296	176	123	105	3063	Bacteria{superkingdom}(100);Actinobacteria{phylum}(100);Actinobacteria{class}(100);Actinomycetales{order}(100);Nocardiaceae{family}(100);Rhodococcus{genus}(100);Unassigned{species}(0)	Bacteria	Actinobacteria	Actinobacteria	Actinomycetales	Nocardiaceae	Rhodococcus	Unassigned
ASV116	451	374	191	163	434	419	93	0	34	80	70	58	19	0	38	85	23	2532	Bacteria{superkingdom}(100);Gemmatimonadetes{phylum}(100);Gemmatimonadetes{class}(100);Gemmatimonadales{order}(100);Gemmatimonadaceae{family}(100);Gemmatimonas{genus}(100);Unassigned{species}(0)	Bacteria	Gemmatimonadetes	Gemmatimonadetes	Gemmatimonadales	Gemmatimonadaceae	Gemmatimonas	Unassigned
ASV117	317	372	227	201	340	320	129	131	0	106	61	110	89	79	187	283	93	3045	Bacteria{superkingdom}(100);Actinobacteria{phylum}(100);Actinobacteria{class}(100);Solirubrobacterales{order}(100);Solirubrobacteraceae{family}(100);Solirubrobacter{genus}(100);Unassigned{species}(0)	Bacteria	Actinobacteria	Actinobacteria	Solirubrobacterales	Solirubrobacteraceae	Solirubrobacter	Unassigned
ASV118	65	41	415	1218	2842	519	37	17	0	288	187	8	0	0	0	0	0	5637	Bacteria{superkingdom}(81);Bacteroidetes{phylum}(81);Sphingobacteriia{class}(81);Sphingobacteriales{order}(81);Chitinophagaceae{family}(81);Niastella{genus}(81);Unassigned{species}(0)	Bacteria	Bacteroidetes	Sphingobacteriia	Sphingobacteriales	Chitinophagaceae	Niastella	Unassigned
ASV119	197	222	49	279	415	345	0	20	0	35	55	27	338	0	139	0	46	2167	Bacteria{superkingdom}(100);Proteobacteria{phylum}(100);Alphaproteobacteria{class}(100);Rhodospirillales{order}(100);Rhodospirillaceae{family}(100);Dongia{genus}(100);Unassigned{species}(0)	Bacteria	Proteobacteria	Alphaproteobacteria	Rhodospirillales	Rhodospirillaceae	Dongia	Unassigned
ASV120	159	263	117	140	181	75	389	330	137	502	263	214	633	247	666	220	370	4906	Bacteria{superkingdom}(94);Proteobacteria{phylum}(94);Betaproteobacteria{class}(94);{order}(94);{family}(94);{genus}(94);Unassigned{species}(0)	Bacteria	Proteobacteria	Betaproteobacteria				Unassigned
ASV121	222	0	69	840	245	830	0	0	0	0	0	0	0	9	0	42	0	2257	Bacteria{superkingdom}(100);Actinobacteria{phylum}(100);Actinobacteria{class}(100);Actinomycetales{order}(100);Nocardioidaceae{family}(100);Kribbella{genus}(100);Unassigned{species}(0)	Bacteria	Actinobacteria	Actinobacteria	Actinomycetales	Nocardioidaceae	Kribbella	Unassigned
ASV123	223	518	171	151	582	129	79	18	110	196	99	88	0	16	0	0	0	2380	Bacteria{superkingdom}(100);Proteobacteria{phylum}(100);Deltaproteobacteria{class}(100);{order}(100);{family}(100);{genus}(100);Unassigned{species}(0)	Bacteria	Proteobacteria	Deltaproteobacteria				Unassigned
ASV124	251	819	508	244	437	616	73	60	35	216	0	84	0	8	0	222	0	3573	Bacteria{superkingdom}(96);Actinobacteria{phylum}(96);Actinobacteria{class}(96);Solirubrobacterales{order}(96);Conexibacteraceae{family}(96);Conexibacter{genus}(96);Unassigned{species}(0)	Bacteria	Actinobacteria	Actinobacteria	Solirubrobacterales	Conexibacteraceae	Conexibacter	Unassigned
ASV125	10	2	11	170	110	220	10	3	9	23	5	1	3	4	1	12	14	608	Bacteria{superkingdom}(100);Proteobacteria{phylum}(100);Gammaproteobacteria{class}(100);Xanthomonadales{order}(100);Sinobacteraceae{family}(100);Steroidobacter{genus}(100);Unassigned{species}(0)	Bacteria	Proteobacteria	Gammaproteobacteria	Xanthomonadales	Sinobacteraceae	Steroidobacter	Unassigned
ASV126	448	232	123	0	150	1153	0	0	0	0	0	0	0	0	0	0	0	2106	Bacteria{superkingdom}(100);Actinobacteria{phylum}(100);Actinobacteria{class}(100);Actinomycetales{order}(100);Pseudonocardiaceae{family}(100);Unassigned{genus}(0);Unassigned{species}(0)	Bacteria	Actinobacteria	Actinobacteria	Actinomycetales	Pseudonocardiaceae	Unassigned	Unassigned
ASV127	0	0	0	76	133	374	0	0	0	0	0	0	120	0	0	0	0	703	Bacteria{superkingdom}(100);Candidatus_Saccharibacteria{phylum}(100);{class}(100);{order}(100);{family}(100);Saccharibacteria_genera_incertae_sedis{genus}(100);Unassigned{species}(0)	Bacteria	Candidatus_Saccharibacteria				Saccharibacteria_genera_incertae_sedis	Unassigned
ASV128	246	263	155	224	292	360	100	89	95	68	88	53	181	101	92	65	125	2597	Bacteria{superkingdom}(96);Proteobacteria{phylum}(96);Alphaproteobacteria{class}(96);Rhizobiales{order}(96);{family}(96);{genus}(96);Unassigned{species}(0)	Bacteria	Proteobacteria	Alphaproteobacteria	Rhizobiales			Unassigned
ASV129	0	0	0	0	45	0	0	0	0	0	0	0	0	0	0	0	0	45	Bacteria{superkingdom}(99);Acidobacteria{phylum}(99);Acidobacteria_Gp4{class}(99);{order}(99);{family}(99);Gp4{genus}(99);Unassigned{species}(0)	Bacteria	Acidobacteria	Acidobacteria_Gp4			Gp4	Unassigned
ASV130	284	275	108	150	327	326	109	26	60	62	0	56	24	0	45	285	0	2137	Bacteria{superkingdom}(100);Actinobacteria{phylum}(100);Actinobacteria{class}(100);Acidimicrobiales{order}(100);Acidimicrobiaceae{family}(100);Ilumatobacter{genus}(100);Unassigned{species}(0)	Bacteria	Actinobacteria	Actinobacteria	Acidimicrobiales	Acidimicrobiaceae	Ilumatobacter	Unassigned
ASV131	296	0	82	219	367	1249	0	0	7	0	0	0	0	19	0	10	0	2249	Bacteria{superkingdom}(100);Actinobacteria{phylum}(100);Actinobacteria{class}(100);Actinomycetales{order}(100);Jiangellaceae{family}(100);Unassigned{genus}(0);Unassigned{species}(0)	Bacteria	Actinobacteria	Actinobacteria	Actinomycetales	Jiangellaceae	Unassigned	Unassigned
ASV132	597	0	190	133	1074	234	37	18	57	35	39	41	15	91	48	26	0	2635	Bacteria{superkingdom}(100);Chloroflexi{phylum}(100);Thermomicrobia{class}(100);Sphaerobacterales{order}(100);Sphaerobacteraceae{family}(100);Sphaerobacter{genus}(100);uncultured_bacterium{species}(100)	Bacteria	Chloroflexi	Thermomicrobia	Sphaerobacterales	Sphaerobacteraceae	Sphaerobacter	uncultured_bacterium
ASV133	222	112	353	0	232	253	84	0	0	0	0	0	0	0	0	0	0	1256	Bacteria{superkingdom}(100);Acidobacteria{phylum}(100);Acidobacteria_Gp6{class}(100);{order}(100);{family}(100);Gp6{genus}(100);Unassigned{species}(0)	Bacteria	Acidobacteria	Acidobacteria_Gp6			Gp6	Unassigned
ASV134	142	144	137	133	181	140	160	165	218	166	207	308	377	105	116	127	170	2996	Bacteria{superkingdom}(89);Actinobacteria{phylum}(89);Actinobacteria{class}(89);Actinomycetales{order}(89);Nocardioidaceae{family}(89);Marmoricola{genus}(89);Unassigned{species}(0)	Bacteria	Actinobacteria	Actinobacteria	Actinomycetales	Nocardioidaceae	Marmoricola	Unassigned
ASV135	785	0	241	109	806	131	118	34	169	277	0	0	0	0	0	10	0	2680	Bacteria{superkingdom}(100);Firmicutes{phylum}(100);Bacilli{class}(100);Bacillales{order}(100);Bacillaceae_1{family}(100);Bacillus{genus}(100);Unassigned{species}(0)	Bacteria	Firmicutes	Bacilli	Bacillales	Bacillaceae_1	Bacillus	Unassigned
ASV136	40	0	14	584	464	391	0	0	0	0	14	8	0	9	19	9	39	1591	Bacteria{superkingdom}(99);Proteobacteria{phylum}(99);Gammaproteobacteria{class}(99);Xanthomonadales{order}(99);Xanthomonadaceae{family}(99);Luteimonas{genus}(99);Unassigned{species}(0)	Bacteria	Proteobacteria	Gammaproteobacteria	Xanthomonadales	Xanthomonadaceae	Luteimonas	Unassigned
ASV137	79	0	0	53	224	159	0	0	0	0	0	0	0	0	0	0	0	515	Bacteria{superkingdom}(92);Proteobacteria{phylum}(92);Gammaproteobacteria{class}(92);Xanthomonadales{order}(92);Sinobacteraceae{family}(92);Unassigned{genus}(0);Unassigned{species}(0)	Bacteria	Proteobacteria	Gammaproteobacteria	Xanthomonadales	Sinobacteraceae	Unassigned	Unassigned
ASV138	439	220	64	265	1187	35	0	165	246	287	20	570	389	119	416	349	228	4999	Bacteria{superkingdom}(100);Actinobacteria{phylum}(100);Actinobacteria{class}(100);Actinomycetales{order}(100);Micrococcaceae{family}(100);Arthrobacter{genus}(100);Unassigned{species}(0)	Bacteria	Actinobacteria	Actinobacteria	Actinomycetales	Micrococcaceae	Arthrobacter	Unassigned
ASV139	190	234	178	42	353	167	253	82	137	159	213	90	183	156	89	57	37	2620	Bacteria{superkingdom}(100);Proteobacteria{phylum}(100);Betaproteobacteria{class}(100);{order}(100);{family}(100);{genus}(100);Unassigned{species}(0)	Bacteria	Proteobacteria	Betaproteobacteria				Unassigned
ASV140	40	121	20	36	81	0	55	360	252	384	103	162	63	331	521	788	302	3619	Bacteria{superkingdom}(94);Proteobacteria{phylum}(94);Alphaproteobacteria{class}(94);Rhizobiales{order}(94);Methylobacteriaceae{family}(94);Microvirga{genus}(94);Unassigned{species}(0)	Bacteria	Proteobacteria	Alphaproteobacteria	Rhizobiales	Methylobacteriaceae	Microvirga	Unassigned
ASV141	339	0	112	387	551	131	448	74	43	0	319	237	115	0	0	0	0	2756	Bacteria{superkingdom}(95);Firmicutes{phylum}(95);Bacilli{class}(95);Bacillales{order}(95);Bacillaceae_1{family}(95);Bacillus{genus}(95);Bacillus_funiculus{species}(95)	Bacteria	Firmicutes	Bacilli	Bacillales	Bacillaceae_1	Bacillus	Bacillus_funiculus
ASV142	229	265	106	348	369	458	0	0	0	48	0	0	52	0	0	0	0	1875	Bacteria{superkingdom}(97);Proteobacteria{phylum}(97);Alphaproteobacteria{class}(97);Rhodospirillales{order}(97);Rhodospirillaceae{family}(97);Dongia{genus}(97);Unassigned{species}(0)	Bacteria	Proteobacteria	Alphaproteobacteria	Rhodospirillales	Rhodospirillaceae	Dongia	Unassigned
ASV143	181	364	239	60	348	225	73	103	49	29	177	50	178	134	142	103	155	2610	Bacteria{superkingdom}(86);Actinobacteria{phylum}(86);Actinobacteria{class}(86);{order}(86);{family}(86);{genus}(86);Unassigned{species}(0)	Bacteria	Actinobacteria	Actinobacteria				Unassigned
ASV144	80	191	0	34	494	20	0	5051	24	84	0	228	0	0	0	0	0	6206	Bacteria{superkingdom}(91);Acidobacteria{phylum}(91);Acidobacteria_Gp7{class}(91);{order}(91);{family}(91);Gp7{genus}(91);uncultured_Anaeromyxobacter_sp.{species}(91)	Bacteria	Acidobacteria	Acidobacteria_Gp7			Gp7	uncultured_Anaeromyxobacter_sp.
ASV145	114	0	79	177	469	516	8	17	38	39	47	12	88	7	4	0	11	1626	Bacteria{superkingdom}(100);Chloroflexi{phylum}(100);Caldilineae{class}(100);Caldilineales{order}(100);Caldilineaceae{family}(100);Litorilinea{genus}(100);uncultured_Litorilinea_sp.{species}(100)	Bacteria	Chloroflexi	Caldilineae	Caldilineales	Caldilineaceae	Litorilinea	uncultured_Litorilinea_sp.
ASV146	81	41	138	627	1441	804	19	0	15	162	0	0	0	0	0	0	0	3328	Bacteria{superkingdom}(81);Bacteroidetes{phylum}(81);Sphingobacteriia{class}(81);Sphingobacteriales{order}(81);Chitinophagaceae{family}(81);{genus}(81);uncultured_Cytophaga_sp.{species}(81)	Bacteria	Bacteroidetes	Sphingobacteriia	Sphingobacteriales	Chitinophagaceae		uncultured_Cytophaga_sp.
ASV147	217	0	132	171	79	366	30	46	43	0	0	70	86	53	24	722	50	2089	Bacteria{superkingdom}(99);Chloroflexi{phylum}(99);Thermomicrobia{class}(99);Sphaerobacterales{order}(99);Sphaerobacteraceae{family}(99);Unassigned{genus}(0);Unassigned{species}(0)	Bacteria	Chloroflexi	Thermomicrobia	Sphaerobacterales	Sphaerobacteraceae	Unassigned	Unassigned
ASV148	164	0	39	21	79	270	29	80	78	33	77	27	91	35	107	74	66	1270	Bacteria{superkingdom}(100);Chloroflexi{phylum}(100);Caldilineae{class}(100);Caldilineales{order}(100);Caldilineaceae{family}(100);Litorilinea{genus}(100);uncultured_Litorilinea_sp.{species}(100)	Bacteria	Chloroflexi	Caldilineae	Caldilineales	Caldilineaceae	Litorilinea	uncultured_Litorilinea_sp.
ASV149	284	337	71	126	0	81	0	354	393	136	72	402	0	0	0	32	0	2288	Bacteria{superkingdom}(100);Acidobacteria{phylum}(100);Acidobacteria_Gp4{class}(100);{order}(100);{family}(100);Gp4{genus}(100);Unassigned{species}(0)	Bacteria	Acidobacteria	Acidobacteria_Gp4			Gp4	Unassigned
ASV150	0	0	93	1231	749	5744	0	0	0	7	117	0	0	0	0	0	0	7941	Bacteria{superkingdom}(100);Actinobacteria{phylum}(100);Actinobacteria{class}(100);Actinomycetales{order}(100);Streptosporangiaceae{family}(100);Nonomuraea{genus}(100);Unassigned{species}(0)	Bacteria	Actinobacteria	Actinobacteria	Actinomycetales	Streptosporangiaceae	Nonomuraea	Unassigned
ASV151	131	0	87	90	0	0	116	85	0	0	0	0	0	0	0	0	0	509	Bacteria{superkingdom}(100);Proteobacteria{phylum}(100);Gammaproteobacteria{class}(100);Xanthomonadales{order}(100);Sinobacteraceae{family}(100);Steroidobacter{genus}(100);Unassigned{species}(0)	Bacteria	Proteobacteria	Gammaproteobacteria	Xanthomonadales	Sinobacteraceae	Steroidobacter	Unassigned
ASV153	152	37	37	42	64	64	44	1330	394	705	114	448	0	76	21	65	216	3809	Bacteria{superkingdom}(100);Actinobacteria{phylum}(100);Actinobacteria{class}(100);{order}(100);{family}(100);{genus}(100);Unassigned{species}(0)	Bacteria	Actinobacteria	Actinobacteria				Unassigned
ASV154	35	0	79	178	348	0	35	442	169	279	389	192	350	0	56	0	184	2736	Bacteria{superkingdom}(100);Bacteroidetes{phylum}(100);Cytophagia{class}(100);Cytophagales{order}(100);Cytophagaceae{family}(100);Adhaeribacter{genus}(100);Unassigned{species}(0)	Bacteria	Bacteroidetes	Cytophagia	Cytophagales	Cytophagaceae	Adhaeribacter	Unassigned
ASV155	239	79	132	189	1907	462	25	0	0	0	29	0	0	29	0	22	0	3113	Bacteria{superkingdom}(100);Bacteroidetes{phylum}(100);Sphingobacteriia{class}(100);Sphingobacteriales{order}(100);Chitinophagaceae{family}(100);Flavitalea{genus}(100);Unassigned{species}(0)	Bacteria	Bacteroidetes	Sphingobacteriia	Sphingobacteriales	Chitinophagaceae	Flavitalea	Unassigned
ASV156	65	144	270	95	242	563	27	0	0	0	0	0	53	27	25	0	23	1534	Bacteria{superkingdom}(100);Verrucomicrobia{phylum}(100);Opitutae{class}(100);Opitutales{order}(100);Opitutaceae{family}(100);Opitutus{genus}(100);Unassigned{species}(0)	Bacteria	Verrucomicrobia	Opitutae	Opitutales	Opitutaceae	Opitutus	Unassigned
ASV157	361	281	160	73	568	207	440	241	269	196	198	214	141	15	45	10	94	3513	Bacteria{superkingdom}(100);Acidobacteria{phylum}(100);Acidobacteria_Gp6{class}(100);{order}(100);{family}(100);Gp6{genus}(100);Unassigned{species}(0)	Bacteria	Acidobacteria	Acidobacteria_Gp6			Gp6	Unassigned
ASV158	95	0	116	58	0	101	578	200	542	204	225	256	224	61	825	33	388	3906	Bacteria{superkingdom}(100);Actinobacteria{phylum}(100);Actinobacteria{class}(100);Solirubrobacterales{order}(100);Unassigned{family}(0);Unassigned{genus}(0);Unassigned{species}(0)	Bacteria	Actinobacteria	Actinobacteria	Solirubrobacterales	Unassigned	Unassigned	Unassigned
ASV159	0	0	0	67	0	0	0	0	0	0	0	0	0	0	0	0	0	67	Bacteria{superkingdom}(90);Actinobacteria{phylum}(90);Actinobacteria{class}(90);Actinomycetales{order}(90);Glycomycetaceae{family}(90);Glycomyces{genus}(90);Glycomyces_scopariae{species}(90)	Bacteria	Actinobacteria	Actinobacteria	Actinomycetales	Glycomycetaceae	Glycomyces	Glycomyces_scopariae
ASV160	415	32	139	127	300	255	122	33	124	34	63	19	76	40	59	43	54	1935	Bacteria{superkingdom}(97);Proteobacteria{phylum}(97);Alphaproteobacteria{class}(97);Rhizobiales{order}(97);Xanthobacteraceae{family}(97);Pseudolabrys{genus}(97);Unassigned{species}(0)	Bacteria	Proteobacteria	Alphaproteobacteria	Rhizobiales	Xanthobacteraceae	Pseudolabrys	Unassigned
ASV161	204	41	198	111	290	195	330	182	203	282	304	91	93	81	194	74	71	2944	Bacteria{superkingdom}(99);Chloroflexi{phylum}(99);Chloroflexia{class}(99);{order}(99);{family}(99);{genus}(99);uncultured_bacterium{species}(99)	Bacteria	Chloroflexi	Chloroflexia				uncultured_bacterium
ASV162	249	621	114	164	125	288	38	0	97	0	0	0	0	93	0	47	0	1836	Bacteria{superkingdom}(100);Acidobacteria{phylum}(100);Acidobacteria_Gp6{class}(100);{order}(100);{family}(100);Gp6{genus}(100);Unassigned{species}(0)	Bacteria	Acidobacteria	Acidobacteria_Gp6			Gp6	Unassigned
ASV163	239	205	178	198	305	130	38	69	104	76	111	169	187	0	112	0	17	2138	Bacteria{superkingdom}(100);Actinobacteria{phylum}(100);Actinobacteria{class}(100);Actinomycetales{order}(100);Nocardioidaceae{family}(100);Nocardioides{genus}(100);Unassigned{species}(0)	Bacteria	Actinobacteria	Actinobacteria	Actinomycetales	Nocardioidaceae	Nocardioides	Unassigned
ASV164	0	0	0	112	0	121	0	0	48	73	0	0	0	0	0	0	0	354	Bacteria{superkingdom}(100);Actinobacteria{phylum}(100);Actinobacteria{class}(100);Actinomycetales{order}(100);Micromonosporaceae{family}(100);Unassigned{genus}(0);Unassigned{species}(0)	Bacteria	Actinobacteria	Actinobacteria	Actinomycetales	Micromonosporaceae	Unassigned	Unassigned
ASV165	135	590	48	112	979	84	0	0	0	7	11	13	42	0	0	0	87	2108	Bacteria{superkingdom}(100);Bacteroidetes{phylum}(100);Cytophagia{class}(100);Cytophagales{order}(100);{family}(100);Chryseolinea{genus}(100);Unassigned{species}(0)	Bacteria	Bacteroidetes	Cytophagia	Cytophagales		Chryseolinea	Unassigned
ASV166	69	106	115	84	1324	124	16	30	38	70	64	54	128	409	145	186	56	3018	Bacteria{superkingdom}(84);Acidobacteria{phylum}(84);Acidobacteria_Gp3{class}(84);{order}(84);{family}(84);{genus}(84);uncultured_Bacillus_sp.{species}(84)	Bacteria	Acidobacteria	Acidobacteria_Gp3				uncultured_Bacillus_sp.
ASV167	10	16	4	98	8	5	543	155	110	192	423	241	352	469	1378	194	250	4448	Bacteria{superkingdom}(82);Actinobacteria{phylum}(82);Actinobacteria{class}(82);Acidimicrobiales{order}(82);Acidimicrobineae_incertae_sedis{family}(82);Aciditerrimonas{genus}(82);uncultured_Acidimicrobiales_bacterium{species}(82)	Bacteria	Actinobacteria	Actinobacteria	Acidimicrobiales	Acidimicrobineae_incertae_sedis	Aciditerrimonas	uncultured_Acidimicrobiales_bacterium
ASV168	203	218	105	156	345	252	64	24	18	80	36	43	0	36	27	90	43	1740	Bacteria{superkingdom}(100);Actinobacteria{phylum}(100);Actinobacteria{class}(100);Solirubrobacterales{order}(100);Solirubrobacteraceae{family}(100);Solirubrobacter{genus}(100);Unassigned{species}(0)	Bacteria	Actinobacteria	Actinobacteria	Solirubrobacterales	Solirubrobacteraceae	Solirubrobacter	Unassigned
ASV169	52	248	123	0	456	92	216	184	433	691	466	89	0	0	0	0	0	3050	Bacteria{superkingdom}(100);Bacteroidetes{phylum}(100);Cytophagia{class}(100);Cytophagales{order}(100);Cytophagaceae{family}(100);Adhaeribacter{genus}(100);Unassigned{species}(0)	Bacteria	Bacteroidetes	Cytophagia	Cytophagales	Cytophagaceae	Adhaeribacter	Unassigned
ASV170	136	0	39	0	0	54	1110	0	941	0	1490	210	554	32	0	0	371	4937	Bacteria{superkingdom}(100);Acidobacteria{phylum}(100);Acidobacteria_Gp10{class}(100);{order}(100);{family}(100);Gp10{genus}(100);Unassigned{species}(0)	Bacteria	Acidobacteria	Acidobacteria_Gp10			Gp10	Unassigned
ASV171	292	0	140	349	1535	261	14	0	0	0	0	0	116	0	21	0	53	2781	Bacteria{superkingdom}(100);Chloroflexi{phylum}(100);Thermomicrobia{class}(100);Unassigned{order}(0);Unassigned{family}(0);Unassigned{genus}(0);Unassigned{species}(0)	Bacteria	Chloroflexi	Thermomicrobia	Unassigned	Unassigned	Unassigned	Unassigned
ASV172	0	0	0	0	0	0	0	0	0	0	24	248	29	0	8	0	0	309	Bacteria{superkingdom}(81);Proteobacteria{phylum}(81);Betaproteobacteria{class}(81);Burkholderiales{order}(81);Oxalobacteraceae{family}(81);Massilia{genus}(81);Massilia_dura{species}(81)	Bacteria	Proteobacteria	Betaproteobacteria	Burkholderiales	Oxalobacteraceae	Massilia	Massilia_dura
ASV173	37	0	25	38	261	118	0	0	0	0	30	0	78	0	0	0	14	601	Bacteria{superkingdom}(97);Bacteroidetes{phylum}(97);Cytophagia{class}(97);Cytophagales{order}(97);{family}(97);Chryseolinea{genus}(97);uncultured_Bacteroidetes_bacterium{species}(97)	Bacteria	Bacteroidetes	Cytophagia	Cytophagales		Chryseolinea	uncultured_Bacteroidetes_bacterium
ASV174	33	388	0	0	43	0	0	0	157	485	0	0	0	6	0	0	0	1112	Bacteria{superkingdom}(100);Unassigned{phylum}(0);Unassigned{class}(0);Unassigned{order}(0);Unassigned{family}(0);Unassigned{genus}(0);Unassigned{species}(0)	Bacteria	Unassigned	Unassigned	Unassigned	Unassigned	Unassigned	Unassigned
ASV175	0	0	0	149	0	195	0	0	0	0	75	7	0	27	18	124	0	595	Bacteria{superkingdom}(100);Actinobacteria{phylum}(100);Actinobacteria{class}(100);Actinomycetales{order}(100);Pseudonocardiaceae{family}(100);Amycolatopsis{genus}(100);Unassigned{species}(0)	Bacteria	Actinobacteria	Actinobacteria	Actinomycetales	Pseudonocardiaceae	Amycolatopsis	Unassigned
ASV177	190	0	201	146	999	174	57	47	39	0	120	82	57	172	29	88	70	2471	Bacteria{superkingdom}(100);Actinobacteria{phylum}(100);Actinobacteria{class}(100);Unassigned{order}(0);Unassigned{family}(0);Unassigned{genus}(0);Unassigned{species}(0)	Bacteria	Actinobacteria	Actinobacteria	Unassigned	Unassigned	Unassigned	Unassigned
ASV178	0	0	0	0	0	3018	0	0	0	0	0	0	0	0	0	0	0	3018	Bacteria{superkingdom}(98);Actinobacteria{phylum}(98);Actinobacteria{class}(98);Actinomycetales{order}(98);Streptomycetaceae{family}(98);Streptomyces{genus}(98);Unassigned{species}(0)	Bacteria	Actinobacteria	Actinobacteria	Actinomycetales	Streptomycetaceae	Streptomyces	Unassigned
ASV179	164	741	89	79	196	107	281	198	203	83	56	47	29	15	30	0	20	2338	Bacteria{superkingdom}(100);Proteobacteria{phylum}(100);Alphaproteobacteria{class}(100);Rhizobiales{order}(100);Rhodobiaceae{family}(100);{genus}(100);uncultured_soil_bacterium{species}(100)	Bacteria	Proteobacteria	Alphaproteobacteria	Rhizobiales	Rhodobiaceae		uncultured_soil_bacterium
ASV180	187	325	132	139	266	74	203	245	228	30	173	70	56	89	34	87	114	2452	Bacteria{superkingdom}(100);Planctomycetes{phylum}(100);Planctomycetia{class}(100);Planctomycetales{order}(100);Planctomycetaceae{family}(100);Pirellula{genus}(100);Unassigned{species}(0)	Bacteria	Planctomycetes	Planctomycetia	Planctomycetales	Planctomycetaceae	Pirellula	Unassigned
ASV181	0	0	33	56	191	0	515	34	50	56	366	274	253	401	0	0	0	2229	Bacteria{superkingdom}(100);Actinobacteria{phylum}(100);Actinobacteria{class}(100);{order}(100);{family}(100);{genus}(100);uncultured_Actinomycetales_bacterium{species}(100)	Bacteria	Actinobacteria	Actinobacteria				uncultured_Actinomycetales_bacterium
ASV182	154	53	132	12	327	646	11	0	0	0	0	0	0	35	0	52	0	1422	Bacteria{superkingdom}(100);Bacteroidetes{phylum}(100);Sphingobacteriia{class}(100);Sphingobacteriales{order}(100);Chitinophagaceae{family}(100);Flavitalea{genus}(100);Unassigned{species}(0)	Bacteria	Bacteroidetes	Sphingobacteriia	Sphingobacteriales	Chitinophagaceae	Flavitalea	Unassigned
ASV183	0	0	0	27	0	0	0	0	0	37	0	0	0	35	0	44	0	143	Bacteria{superkingdom}(96);Proteobacteria{phylum}(96);Gammaproteobacteria{class}(96);{order}(96);{family}(96);{genus}(96);uncultured_Steroidobacter_sp.{species}(96)	Bacteria	Proteobacteria	Gammaproteobacteria				uncultured_Steroidobacter_sp.
ASV184	161	32	55	44	140	113	86	14	74	45	30	7	55	0	0	39	9	904	Bacteria{superkingdom}(85);{phylum}(85);{class}(85);{order}(85);{family}(85);{genus}(85);uncultured_Syntrophobacter_sp.{species}(85)	Bacteria						uncultured_Syntrophobacter_sp.
ASV185	251	86	37	0	2055	231	0	9	0	0	0	0	0	0	0	0	0	2669	Bacteria{superkingdom}(100);Bacteroidetes{phylum}(100);Cytophagia{class}(100);Cytophagales{order}(100);{family}(100);Ohtaekwangia{genus}(100);Unassigned{species}(0)	Bacteria	Bacteroidetes	Cytophagia	Cytophagales		Ohtaekwangia	Unassigned
ASV186	0	0	0	0	0	0	0	0	15	0	0	50	0	21	11	85	0	182	Bacteria{superkingdom}(81);Bacteroidetes{phylum}(81);Sphingobacteriia{class}(81);Sphingobacteriales{order}(81);Chitinophagaceae{family}(81);Flavisolibacter{genus}(81);Unassigned{species}(0)	Bacteria	Bacteroidetes	Sphingobacteriia	Sphingobacteriales	Chitinophagaceae	Flavisolibacter	Unassigned
ASV187	0	0	0	0	0	0	0	0	0	0	0	0	0	0	79	0	0	79	Bacteria{superkingdom}(100);Proteobacteria{phylum}(100);Gammaproteobacteria{class}(100);Enterobacteriales{order}(100);Enterobacteriaceae{family}(100);Unassigned{genus}(0);Unassigned{species}(0)	Bacteria	Proteobacteria	Gammaproteobacteria	Enterobacteriales	Enterobacteriaceae	Unassigned	Unassigned
ASV188	21	0	0	42	0	0	0	0	37	95	173	122	0	371	190	460	7	1518	Bacteria{superkingdom}(88);Actinobacteria{phylum}(88);Actinobacteria{class}(88);Actinomycetales{order}(88);Pseudonocardiaceae{family}(88);Actinomycetospora{genus}(88);uncultured_bacterium{species}(88)	Bacteria	Actinobacteria	Actinobacteria	Actinomycetales	Pseudonocardiaceae	Actinomycetospora	uncultured_bacterium
ASV189	152	114	46	13	67	92	94	13	31	26	15	19	0	0	0	0	0	682	Bacteria{superkingdom}(100);Proteobacteria{phylum}(100);Alphaproteobacteria{class}(100);Unassigned{order}(0);Unassigned{family}(0);Unassigned{genus}(0);Unassigned{species}(0)	Bacteria	Proteobacteria	Alphaproteobacteria	Unassigned	Unassigned	Unassigned	Unassigned
ASV190	98	29	151	313	437	293	11	0	0	0	0	0	0	0	0	10	8	1350	Bacteria{superkingdom}(100);Proteobacteria{phylum}(100);Alphaproteobacteria{class}(100);Rhizobiales{order}(100);Hyphomicrobiaceae{family}(100);Devosia{genus}(100);Unassigned{species}(0)	Bacteria	Proteobacteria	Alphaproteobacteria	Rhizobiales	Hyphomicrobiaceae	Devosia	Unassigned
ASV191	298	5	137	0	18	1220	1	0	0	0	0	0	0	0	0	0	0	1679	Bacteria{superkingdom}(100);Acidobacteria{phylum}(100);Acidobacteria_Gp4{class}(100);{order}(100);{family}(100);Gp4{genus}(100);Unassigned{species}(0)	Bacteria	Acidobacteria	Acidobacteria_Gp4			Gp4	Unassigned
ASV192	102	236	11	0	135	256	10	9	0	0	0	0	31	15	0	22	33	860	Bacteria{superkingdom}(94);Proteobacteria{phylum}(94);Alphaproteobacteria{class}(94);Rhizobiales{order}(94);Rhodobiaceae{family}(94);{genus}(94);Nordella_oligomobilis{species}(94)	Bacteria	Proteobacteria	Alphaproteobacteria	Rhizobiales	Rhodobiaceae		Nordella_oligomobilis
ASV193	66	0	119	152	229	33	38	0	10	0	0	0	0	0	0	5	0	652	Bacteria{superkingdom}(100);Bacteroidetes{phylum}(100);Sphingobacteriia{class}(100);Sphingobacteriales{order}(100);Chitinophagaceae{family}(100);Unassigned{genus}(0);Unassigned{species}(0)	Bacteria	Bacteroidetes	Sphingobacteriia	Sphingobacteriales	Chitinophagaceae	Unassigned	Unassigned
ASV194	107	29	31	249	391	534	0	0	10	0	15	0	10	0	0	26	7	1409	Bacteria{superkingdom}(100);Proteobacteria{phylum}(100);Gammaproteobacteria{class}(100);Xanthomonadales{order}(100);Sinobacteraceae{family}(100);Unassigned{genus}(0);Unassigned{species}(0)	Bacteria	Proteobacteria	Gammaproteobacteria	Xanthomonadales	Sinobacteraceae	Unassigned	Unassigned
ASV195	68	168	94	70	145	124	70	59	123	213	202	239	0	93	325	65	82	2140	Bacteria{superkingdom}(99);Chloroflexi{phylum}(99);Anaerolineae{class}(99);Anaerolineales{order}(99);Anaerolineaceae{family}(99);{genus}(99);uncultured_soil_bacterium{species}(99)	Bacteria	Chloroflexi	Anaerolineae	Anaerolineales	Anaerolineaceae		uncultured_soil_bacterium
ASV196	293	0	138	575	839	85	740	0	0	40	343	472	38	0	0	0	0	3563	Bacteria{superkingdom}(90);Firmicutes{phylum}(90);Bacilli{class}(90);Bacillales{order}(90);Bacillaceae_1{family}(90);Bacillus{genus}(90);Unassigned{species}(0)	Bacteria	Firmicutes	Bacilli	Bacillales	Bacillaceae_1	Bacillus	Unassigned
ASV197	0	0	0	184	0	0	0	0	0	80	0	44	0	109	0	403	0	820	Bacteria{superkingdom}(100);Actinobacteria{phylum}(100);Actinobacteria{class}(100);Actinomycetales{order}(100);Nocardioidaceae{family}(100);Kribbella{genus}(100);Unassigned{species}(0)	Bacteria	Actinobacteria	Actinobacteria	Actinomycetales	Nocardioidaceae	Kribbella	Unassigned
ASV198	0	31	0	0	0	0	2	0	0	0	0	0	0	0	0	0	0	33	Bacteria{superkingdom}(100);Bacteroidetes{phylum}(100);Unassigned{class}(0);Unassigned{order}(0);Unassigned{family}(0);Unassigned{genus}(0);Unassigned{species}(0)	Bacteria	Bacteroidetes	Unassigned	Unassigned	Unassigned	Unassigned	Unassigned
ASV199	144	88	15	0	118	176	0	17	10	29	26	34	0	51	67	46	0	821	Bacteria{superkingdom}(100);Proteobacteria{phylum}(100);Gammaproteobacteria{class}(100);{order}(100);{family}(100);{genus}(100);Unassigned{species}(0)	Bacteria	Proteobacteria	Gammaproteobacteria				Unassigned
ASV200	358	0	606	0	128	149	92	5	6	0	0	0	0	0	0	0	0	1344	Bacteria{superkingdom}(91);{phylum}(91);{class}(91);{order}(91);{family}(91);{genus}(91);uncultured_Micromonospora_sp.{species}(91)	Bacteria						uncultured_Micromonospora_sp.
ASV201	44	22	186	13	113	0	313	284	340	511	111	700	956	280	345	124	616	4958	Bacteria{superkingdom}(100);Proteobacteria{phylum}(100);Alphaproteobacteria{class}(100);Rhodobacterales{order}(100);Rhodobacteraceae{family}(100);Rubellimicrobium{genus}(100);Unassigned{species}(0)	Bacteria	Proteobacteria	Alphaproteobacteria	Rhodobacterales	Rhodobacteraceae	Rubellimicrobium	Unassigned
ASV202	0	0	0	335	0	0	0	29	122	164	58	432	86	433	497	686	179	3021	Bacteria{superkingdom}(97);Proteobacteria{phylum}(97);Alphaproteobacteria{class}(97);Rhizobiales{order}(97);Methylobacteriaceae{family}(97);Microvirga{genus}(97);Unassigned{species}(0)	Bacteria	Proteobacteria	Alphaproteobacteria	Rhizobiales	Methylobacteriaceae	Microvirga	Unassigned
ASV203	312	61	235	48	574	201	146	0	34	0	0	0	0	0	0	0	0	1611	Bacteria{superkingdom}(87);Proteobacteria{phylum}(87);Deltaproteobacteria{class}(87);{order}(87);{family}(87);{genus}(87);uncultured_Acidobacteriales_bacterium{species}(87)	Bacteria	Proteobacteria	Deltaproteobacteria				uncultured_Acidobacteriales_bacterium
ASV204	232	590	203	79	93	92	676	357	236	90	127	121	110	41	0	0	118	3165	Bacteria{superkingdom}(95);Proteobacteria{phylum}(95);Betaproteobacteria{class}(95);{order}(95);{family}(95);{genus}(95);Unassigned{species}(0)	Bacteria	Proteobacteria	Betaproteobacteria				Unassigned
ASV205	206	129	159	126	160	176	178	143	106	127	93	98	96	31	96	142	90	2156	Bacteria{superkingdom}(89);Actinobacteria{phylum}(89);Actinobacteria{class}(89);Acidimicrobiales{order}(89);Acidimicrobineae_incertae_sedis{family}(89);Aciditerrimonas{genus}(89);uncultured_Acidimicrobiales_bacterium{species}(89)	Bacteria	Actinobacteria	Actinobacteria	Acidimicrobiales	Acidimicrobineae_incertae_sedis	Aciditerrimonas	uncultured_Acidimicrobiales_bacterium
ASV207	127	0	73	116	571	266	32	23	71	16	0	0	39	25	0	0	46	1405	Bacteria{superkingdom}(97);Proteobacteria{phylum}(97);Alphaproteobacteria{class}(97);Rhizobiales{order}(97);Hyphomicrobiaceae{family}(97);Hyphomicrobium{genus}(97);Unassigned{species}(0)	Bacteria	Proteobacteria	Alphaproteobacteria	Rhizobiales	Hyphomicrobiaceae	Hyphomicrobium	Unassigned
ASV208	376	0	179	265	1051	0	0	0	30	0	35	0	28	18	0	0	42	2024	Bacteria{superkingdom}(96);Proteobacteria{phylum}(96);Alphaproteobacteria{class}(96);Rhizobiales{order}(96);Rhizobiaceae{family}(96);Rhizobium{genus}(96);Unassigned{species}(0)	Bacteria	Proteobacteria	Alphaproteobacteria	Rhizobiales	Rhizobiaceae	Rhizobium	Unassigned
ASV209	0	41	10	67	138	44	0	0	0	4	0	0	0	0	0	0	0	304	Bacteria{superkingdom}(88);Bacteroidetes{phylum}(88);Cytophagia{class}(88);Cytophagales{order}(88);{family}(88);Chryseolinea{genus}(88);Unassigned{species}(0)	Bacteria	Bacteroidetes	Cytophagia	Cytophagales		Chryseolinea	Unassigned
ASV210	84	236	49	46	81	80	98	83	130	93	85	74	90	128	68	52	70	1547	Bacteria{superkingdom}(100);Unassigned{phylum}(0);Unassigned{class}(0);Unassigned{order}(0);Unassigned{family}(0);Unassigned{genus}(0);Unassigned{species}(0)	Bacteria	Unassigned	Unassigned	Unassigned	Unassigned	Unassigned	Unassigned
ASV211	139	72	70	54	110	74	157	558	127	173	122	146	101	259	36	158	185	2541	Bacteria{superkingdom}(83);Proteobacteria{phylum}(83);Betaproteobacteria{class}(83);{order}(83);{family}(83);{genus}(83);bacterium_Ellin6067{species}(83)	Bacteria	Proteobacteria	Betaproteobacteria				bacterium_Ellin6067
ASV212	83	19	37	163	41	28	32	65	185	662	48	89	0	11	7	18	0	1488	Bacteria{superkingdom}(100);Proteobacteria{phylum}(100);Gammaproteobacteria{class}(100);Unassigned{order}(0);Unassigned{family}(0);Unassigned{genus}(0);Unassigned{species}(0)	Bacteria	Proteobacteria	Gammaproteobacteria	Unassigned	Unassigned	Unassigned	Unassigned
ASV213	0	0	0	23	0	0	0	0	0	0	88	65	0	1867	455	81	0	2579	Bacteria{superkingdom}(80);Actinobacteria{phylum}(80);Actinobacteria{class}(80);Actinomycetales{order}(80);Pseudonocardiaceae{family}(80);Actinophytocola{genus}(80);uncultured_bacterium{species}(80)	Bacteria	Actinobacteria	Actinobacteria	Actinomycetales	Pseudonocardiaceae	Actinophytocola	uncultured_bacterium
ASV214	145	0	254	133	671	503	25	0	0	0	0	0	33	0	0	0	0	1764	Bacteria{superkingdom}(94);Chloroflexi{phylum}(94);Thermomicrobia{class}(94);Sphaerobacterales{order}(94);Sphaerobacteraceae{family}(94);{genus}(94);Unassigned{species}(0)	Bacteria	Chloroflexi	Thermomicrobia	Sphaerobacterales	Sphaerobacteraceae		Unassigned
ASV215	145	0	217	40	173	0	100	0	0	52	58	53	0	0	0	315	0	1153	Bacteria{superkingdom}(80);Proteobacteria{phylum}(80);Deltaproteobacteria{class}(80);Myxococcales{order}(80);Cystobacteraceae{family}(80);Unassigned{genus}(0);Unassigned{species}(0)	Bacteria	Proteobacteria	Deltaproteobacteria	Myxococcales	Cystobacteraceae	Unassigned	Unassigned
ASV216	104	431	166	216	108	136	283	224	141	273	116	266	259	348	27	55	89	3242	Bacteria{superkingdom}(100);Actinobacteria{phylum}(100);Actinobacteria{class}(100);Solirubrobacterales{order}(100);Unassigned{family}(0);Unassigned{genus}(0);Unassigned{species}(0)	Bacteria	Actinobacteria	Actinobacteria	Solirubrobacterales	Unassigned	Unassigned	Unassigned
ASV217	0	0	0	0	237	98	134	0	71	26	0	0	0	0	0	0	0	566	Bacteria{superkingdom}(100);Acidobacteria{phylum}(100);Acidobacteria_Gp4{class}(100);{order}(100);{family}(100);Gp4{genus}(100);Unassigned{species}(0)	Bacteria	Acidobacteria	Acidobacteria_Gp4			Gp4	Unassigned
ASV218	0	0	0	0	332	199	0	0	0	0	0	0	48	0	0	0	0	579	Bacteria{superkingdom}(88);Bacteroidetes{phylum}(88);Cytophagia{class}(88);Cytophagales{order}(88);{family}(88);Ohtaekwangia{genus}(88);uncultured_Bacteroidetes_bacterium{species}(88)	Bacteria	Bacteroidetes	Cytophagia	Cytophagales		Ohtaekwangia	uncultured_Bacteroidetes_bacterium
ASV219	195	144	197	131	258	67	317	249	754	52	122	103	0	0	164	14	57	2824	Bacteria{superkingdom}(97);Chloroflexi{phylum}(97);Anaerolineae{class}(97);Anaerolineales{order}(97);Anaerolineaceae{family}(97);{genus}(97);uncultured_soil_bacterium{species}(97)	Bacteria	Chloroflexi	Anaerolineae	Anaerolineales	Anaerolineaceae		uncultured_soil_bacterium
ASV220	0	74	0	0	0	0	0	0	0	50	0	31	0	0	0	0	47	202	Bacteria{superkingdom}(86);Proteobacteria{phylum}(86);Betaproteobacteria{class}(86);{order}(86);{family}(86);{genus}(86);Unassigned{species}(0)	Bacteria	Proteobacteria	Betaproteobacteria				Unassigned
ASV221	91	402	74	31	69	44	94	67	91	134	172	211	47	116	140	509	241	2533	Bacteria{superkingdom}(100);Actinobacteria{phylum}(100);Actinobacteria{class}(100);Actinomycetales{order}(100);Geodermatophilaceae{family}(100);Blastococcus{genus}(100);Unassigned{species}(0)	Bacteria	Actinobacteria	Actinobacteria	Actinomycetales	Geodermatophilaceae	Blastococcus	Unassigned
ASV222	922	132	767	0	391	232	0	0	0	0	0	0	0	0	0	0	0	2444	Bacteria{superkingdom}(99);Chloroflexi{phylum}(99);{class}(99);{order}(99);{family}(99);{genus}(99);uncultured_Anaerolineae_bacterium{species}(99)	Bacteria	Chloroflexi					uncultured_Anaerolineae_bacterium
ASV224	23	17	6	59	168	667	42	0	0	10	0	5	0	15	0	16	0	1028	Bacteria{superkingdom}(84);Actinobacteria{phylum}(84);Actinobacteria{class}(84);Actinomycetales{order}(84);Pseudonocardiaceae{family}(84);Actinophytocola{genus}(84);uncultured_bacterium{species}(84)	Bacteria	Actinobacteria	Actinobacteria	Actinomycetales	Pseudonocardiaceae	Actinophytocola	uncultured_bacterium
ASV225	219	60	131	27	383	92	99	49	72	90	275	86	329	0	0	0	45	1957	Bacteria{superkingdom}(97);Firmicutes{phylum}(97);Bacilli{class}(97);Bacillales{order}(97);Bacillaceae_1{family}(97);Bacillus{genus}(97);Unassigned{species}(0)	Bacteria	Firmicutes	Bacilli	Bacillales	Bacillaceae_1	Bacillus	Unassigned
ASV226	148	0	84	65	429	228	325	309	443	423	125	133	188	78	0	136	113	3227	Bacteria{superkingdom}(100);Nitrospirae{phylum}(100);Nitrospira{class}(100);Nitrospirales{order}(100);Nitrospiraceae{family}(100);Nitrospira{genus}(100);Unassigned{species}(0)	Bacteria	Nitrospirae	Nitrospira	Nitrospirales	Nitrospiraceae	Nitrospira	Unassigned
ASV227	0	554	0	23	0	0	194	98	50	43	256	153	121	492	448	367	117	2916	Bacteria{superkingdom}(94);Actinobacteria{phylum}(94);Actinobacteria{class}(94);Acidimicrobiales{order}(94);{family}(94);{genus}(94);uncultured_Thermobifida_sp.{species}(94)	Bacteria	Actinobacteria	Actinobacteria	Acidimicrobiales			uncultured_Thermobifida_sp.
ASV228	298	81	88	113	513	624	18	0	15	31	24	20	15	15	9	6	55	1925	Bacteria{superkingdom}(98);Actinobacteria{phylum}(98);Actinobacteria{class}(98);Actinomycetales{order}(98);Nocardioidaceae{family}(98);Aeromicrobium{genus}(98);Unassigned{species}(0)	Bacteria	Actinobacteria	Actinobacteria	Actinomycetales	Nocardioidaceae	Aeromicrobium	Unassigned
ASV229	295	42	70	62	1283	226	28	84	14	0	75	38	130	25	168	0	57	2597	Bacteria{superkingdom}(100);Acidobacteria{phylum}(100);Acidobacteria_Gp6{class}(100);{order}(100);{family}(100);Gp6{genus}(100);Unassigned{species}(0)	Bacteria	Acidobacteria	Acidobacteria_Gp6			Gp6	Unassigned
ASV230	88	29	11	184	0	16	0	0	0	0	0	0	54	0	0	220	7	609	Bacteria{superkingdom}(100);Acidobacteria{phylum}(100);Acidobacteria_Gp10{class}(100);{order}(100);{family}(100);Gp10{genus}(100);Unassigned{species}(0)	Bacteria	Acidobacteria	Acidobacteria_Gp10			Gp10	Unassigned
ASV231	0	0	15	0	196	65	0	16	0	7	0	15	0	26	18	46	0	404	Bacteria{superkingdom}(100);Proteobacteria{phylum}(100);Gammaproteobacteria{class}(100);Xanthomonadales{order}(100);Sinobacteraceae{family}(100);Steroidobacter{genus}(100);Unassigned{species}(0)	Bacteria	Proteobacteria	Gammaproteobacteria	Xanthomonadales	Sinobacteraceae	Steroidobacter	Unassigned
ASV232	204	214	180	137	746	142	65	212	166	92	59	46	210	28	0	39	39	2579	Bacteria{superkingdom}(100);Chloroflexi{phylum}(100);Chloroflexia{class}(100);Kallotenuales{order}(100);Kallotenuaceae{family}(100);Kallotenue{genus}(100);uncultured_bacterium{species}(100)	Bacteria	Chloroflexi	Chloroflexia	Kallotenuales	Kallotenuaceae	Kallotenue	uncultured_bacterium
ASV233	80	493	66	79	120	0	398	207	121	114	119	225	81	0	30	65	0	2198	Bacteria{superkingdom}(100);Actinobacteria{phylum}(100);Actinobacteria{class}(100);Acidimicrobiales{order}(100);Unassigned{family}(0);Unassigned{genus}(0);Unassigned{species}(0)	Bacteria	Actinobacteria	Actinobacteria	Acidimicrobiales	Unassigned	Unassigned	Unassigned
ASV234	61	624	548	138	3353	0	1451	0	0	50	0	0	0	2	19	0	20	6266	Bacteria{superkingdom}(86);Acidobacteria{phylum}(86);Acidobacteria_Gp10{class}(86);{order}(86);{family}(86);Gp10{genus}(86);uncultured_soil_bacterium{species}(86)	Bacteria	Acidobacteria	Acidobacteria_Gp10			Gp10	uncultured_soil_bacterium
ASV235	84	0	0	0	0	0	0	0	0	0	0	168	0	18	0	16	0	286	Bacteria{superkingdom}(94);Bacteroidetes{phylum}(94);Cytophagia{class}(94);Cytophagales{order}(94);{family}(94);Chryseolinea{genus}(94);Unassigned{species}(0)	Bacteria	Bacteroidetes	Cytophagia	Cytophagales		Chryseolinea	Unassigned
ASV236	0	0	0	68	0	302	0	0	75	77	0	0	0	21	0	35	0	578	Bacteria{superkingdom}(100);Bacteroidetes{phylum}(100);Sphingobacteriia{class}(100);Sphingobacteriales{order}(100);Chitinophagaceae{family}(100);Chitinophaga{genus}(100);Unassigned{species}(0)	Bacteria	Bacteroidetes	Sphingobacteriia	Sphingobacteriales	Chitinophagaceae	Chitinophaga	Unassigned
ASV237	178	86	158	30	175	107	20	22	24	40	0	68	8	25	110	78	33	1162	Bacteria{superkingdom}(100);Proteobacteria{phylum}(100);Alphaproteobacteria{class}(100);Rhizobiales{order}(100);Methylobacteriaceae{family}(100);Microvirga{genus}(100);Unassigned{species}(0)	Bacteria	Proteobacteria	Alphaproteobacteria	Rhizobiales	Methylobacteriaceae	Microvirga	Unassigned
ASV238	62	0	11	113	155	475	0	0	0	0	0	0	7	0	0	3	0	826	Bacteria{superkingdom}(84);Acidobacteria{phylum}(84);Acidobacteria_Gp3{class}(84);{order}(84);{family}(84);Gp3{genus}(84);Unassigned{species}(0)	Bacteria	Acidobacteria	Acidobacteria_Gp3			Gp3	Unassigned
ASV239	104	956	34	151	168	84	56	190	201	227	124	77	618	521	0	231	276	4018	Bacteria{superkingdom}(100);Chloroflexi{phylum}(100);Anaerolineae{class}(100);Anaerolineales{order}(100);Anaerolineaceae{family}(100);{genus}(100);uncultured_soil_bacterium{species}(100)	Bacteria	Chloroflexi	Anaerolineae	Anaerolineales	Anaerolineaceae		uncultured_soil_bacterium
ASV240	151	0	67	183	160	90	108	124	109	99	185	268	69	92	136	87	513	2441	Bacteria{superkingdom}(93);Proteobacteria{phylum}(93);Betaproteobacteria{class}(93);Burkholderiales{order}(93);Comamonadaceae{family}(93);Ramlibacter{genus}(93);Unassigned{species}(0)	Bacteria	Proteobacteria	Betaproteobacteria	Burkholderiales	Comamonadaceae	Ramlibacter	Unassigned
ASV241	144	0	12	553	115	53	90	167	0	256	93	50	394	0	0	0	0	1927	Bacteria{superkingdom}(93);Firmicutes{phylum}(93);Bacilli{class}(93);Bacillales{order}(93);Bacillaceae_1{family}(93);Domibacillus{genus}(93);uncultured_bacterium{species}(93)	Bacteria	Firmicutes	Bacilli	Bacillales	Bacillaceae_1	Domibacillus	uncultured_bacterium
ASV242	0	910	37	137	271	1058	29	0	7	127	0	0	0	0	23	162	50	2811	Bacteria{superkingdom}(100);Acidobacteria{phylum}(100);Acidobacteria_Gp7{class}(100);{order}(100);{family}(100);Gp7{genus}(100);Unassigned{species}(0)	Bacteria	Acidobacteria	Acidobacteria_Gp7			Gp7	Unassigned
ASV243	162	0	137	210	276	189	53	0	54	0	0	0	44	0	0	0	0	1125	Bacteria{superkingdom}(99);Firmicutes{phylum}(99);Bacilli{class}(99);Bacillales{order}(99);Paenibacillaceae_1{family}(99);Paenibacillus{genus}(99);Unassigned{species}(0)	Bacteria	Firmicutes	Bacilli	Bacillales	Paenibacillaceae_1	Paenibacillus	Unassigned
ASV244	138	83	66	54	211	98	87	90	80	69	107	83	263	78	167	58	84	1816	Bacteria{superkingdom}(100);Proteobacteria{phylum}(100);Alphaproteobacteria{class}(100);Rhizobiales{order}(100);Hyphomicrobiaceae{family}(100);Unassigned{genus}(0);Unassigned{species}(0)	Bacteria	Proteobacteria	Alphaproteobacteria	Rhizobiales	Hyphomicrobiaceae	Unassigned	Unassigned
ASV245	80	56	278	29	1627	75	37	0	16	0	0	0	0	0	0	0	0	2198	Bacteria{superkingdom}(100);Bacteroidetes{phylum}(100);Sphingobacteriia{class}(100);Sphingobacteriales{order}(100);Chitinophagaceae{family}(100);Unassigned{genus}(0);Unassigned{species}(0)	Bacteria	Bacteroidetes	Sphingobacteriia	Sphingobacteriales	Chitinophagaceae	Unassigned	Unassigned
ASV246	0	27	0	0	0	0	0	0	56	30	0	0	0	0	0	0	0	113	Bacteria{superkingdom}(98);Acidobacteria{phylum}(98);Acidobacteria_Gp4{class}(98);{order}(98);{family}(98);Gp4{genus}(98);uncultured_actinobacterium{species}(98)	Bacteria	Acidobacteria	Acidobacteria_Gp4			Gp4	uncultured_actinobacterium
ASV247	105	0	21	82	118	49	70	200	194	261	160	139	354	297	40	128	113	2331	Bacteria{superkingdom}(85);Proteobacteria{phylum}(85);Deltaproteobacteria{class}(85);{order}(85);{family}(85);{genus}(85);Alteromonas_sp._Gp-3-7.1{species}(85)	Bacteria	Proteobacteria	Deltaproteobacteria				Alteromonas_sp._Gp-3-7.1
ASV248	51	348	0	57	27	235	0	0	0	0	0	0	23	0	0	0	0	741	Bacteria{superkingdom}(100);Bacteroidetes{phylum}(100);Flavobacteriia{class}(100);Flavobacteriales{order}(100);Flavobacteriaceae{family}(100);Flavobacterium{genus}(100);Unassigned{species}(0)	Bacteria	Bacteroidetes	Flavobacteriia	Flavobacteriales	Flavobacteriaceae	Flavobacterium	Unassigned
ASV249	553	46	92	88	178	31	174	277	360	173	27	132	0	0	0	0	16	2147	Bacteria{superkingdom}(100);Chloroflexi{phylum}(100);Chloroflexia{class}(100);{order}(100);{family}(100);{genus}(100);uncultured_bacterium{species}(100)	Bacteria	Chloroflexi	Chloroflexia				uncultured_bacterium
ASV250	129	34	226	141	335	149	11	17	0	50	0	0	0	0	0	0	0	1092	Bacteria{superkingdom}(82);Proteobacteria{phylum}(82);Gammaproteobacteria{class}(82);Xanthomonadales{order}(82);{family}(82);{genus}(82);uncultured_Pseudomonadales_bacterium{species}(82)	Bacteria	Proteobacteria	Gammaproteobacteria	Xanthomonadales			uncultured_Pseudomonadales_bacterium
ASV251	76	493	28	171	103	58	0	0	0	94	0	55	38	25	50	40	0	1231	Bacteria{superkingdom}(90);Bacteroidetes{phylum}(90);Cytophagia{class}(90);Cytophagales{order}(90);{family}(90);Ohtaekwangia{genus}(90);uncultured_Sphingobacteriales_bacterium{species}(90)	Bacteria	Bacteroidetes	Cytophagia	Cytophagales		Ohtaekwangia	uncultured_Sphingobacteriales_bacterium
ASV252	20	0	52	32	69	140	86	23	77	10	0	31	0	0	0	0	0	540	Bacteria{superkingdom}(99);Chloroflexi{phylum}(99);{class}(99);{order}(99);{family}(99);{genus}(99);Unassigned{species}(0)	Bacteria	Chloroflexi					Unassigned
ASV253	91	0	42	153	237	290	0	0	0	0	0	0	81	0	0	0	31	925	Bacteria{superkingdom}(100);Proteobacteria{phylum}(100);Alphaproteobacteria{class}(100);Rhodospirillales{order}(100);{family}(100);Reyranella{genus}(100);Unassigned{species}(0)	Bacteria	Proteobacteria	Alphaproteobacteria	Rhodospirillales		Reyranella	Unassigned
ASV254	289	0	79	586	908	202	0	20	77	29	0	46	42	39	68	44	77	2506	Bacteria{superkingdom}(100);Proteobacteria{phylum}(100);Alphaproteobacteria{class}(100);Rhizobiales{order}(100);Bradyrhizobiaceae{family}(100);Bosea{genus}(100);Unassigned{species}(0)	Bacteria	Proteobacteria	Alphaproteobacteria	Rhizobiales	Bradyrhizobiaceae	Bosea	Unassigned
ASV255	54	0	0	0	0	273	0	19	7	45	0	23	14	25	36	0	6	502	Bacteria{superkingdom}(100);Proteobacteria{phylum}(100);Gammaproteobacteria{class}(100);Xanthomonadales{order}(100);Sinobacteraceae{family}(100);Unassigned{genus}(0);Unassigned{species}(0)	Bacteria	Proteobacteria	Gammaproteobacteria	Xanthomonadales	Sinobacteraceae	Unassigned	Unassigned
ASV256	157	0	99	177	345	256	0	0	0	87	0	65	126	44	79	41	42	1518	Bacteria{superkingdom}(100);Proteobacteria{phylum}(100);Alphaproteobacteria{class}(100);Rhizobiales{order}(100);Methylobacteriaceae{family}(100);Microvirga{genus}(100);Unassigned{species}(0)	Bacteria	Proteobacteria	Alphaproteobacteria	Rhizobiales	Methylobacteriaceae	Microvirga	Unassigned
ASV257	0	0	135	87	148	0	0	0	0	13	0	0	3841	89	0	238	0	4551	Bacteria{superkingdom}(100);Acidobacteria{phylum}(100);Acidobacteria_Gp7{class}(100);{order}(100);{family}(100);Gp7{genus}(100);Unassigned{species}(0)	Bacteria	Acidobacteria	Acidobacteria_Gp7			Gp7	Unassigned
ASV259	81	22	122	7	27	81	0	0	0	0	0	0	3	6	0	0	20	369	Bacteria{superkingdom}(100);Acidobacteria{phylum}(100);Acidobacteria_Gp10{class}(100);{order}(100);{family}(100);Gp10{genus}(100);Unassigned{species}(0)	Bacteria	Acidobacteria	Acidobacteria_Gp10			Gp10	Unassigned
ASV260	50	489	7	0	178	81	47	0	0	0	0	0	0	0	0	0	0	852	Bacteria{superkingdom}(90);Acidobacteria{phylum}(90);Acidobacteria_Gp4{class}(90);{order}(90);{family}(90);Gp4{genus}(90);uncultured_Rhodopseudomonas_sp.{species}(90)	Bacteria	Acidobacteria	Acidobacteria_Gp4			Gp4	uncultured_Rhodopseudomonas_sp.
ASV261	66	16	49	66	882	319	25	0	0	21	0	0	0	0	0	0	6	1450	Bacteria{superkingdom}(100);Chloroflexi{phylum}(100);Chloroflexia{class}(100);Chloroflexales{order}(100);{family}(100);{genus}(100);uncultured_soil_bacterium{species}(100)	Bacteria	Chloroflexi	Chloroflexia	Chloroflexales			uncultured_soil_bacterium
ASV262	122	0	50	147	423	65	48	26	0	15	38	12	88	0	0	0	0	1034	Bacteria{superkingdom}(100);Bacteroidetes{phylum}(100);Cytophagia{class}(100);Cytophagales{order}(100);{family}(100);Ohtaekwangia{genus}(100);Unassigned{species}(0)	Bacteria	Bacteroidetes	Cytophagia	Cytophagales		Ohtaekwangia	Unassigned
ASV263	66	19	0	30	250	90	0	0	0	0	39	0	0	0	0	29	0	523	Bacteria{superkingdom}(94);Actinobacteria{phylum}(94);Actinobacteria{class}(94);Solirubrobacterales{order}(94);Conexibacteraceae{family}(94);Conexibacter{genus}(94);uncultured_Rubrobacteraceae_bacterium{species}(94)	Bacteria	Actinobacteria	Actinobacteria	Solirubrobacterales	Conexibacteraceae	Conexibacter	uncultured_Rubrobacteraceae_bacterium
ASV264	233	0	11	0	0	322	511	0	676	237	137	0	0	0	0	0	0	2127	Bacteria{superkingdom}(100);Chloroflexi{phylum}(100);Anaerolineae{class}(100);Anaerolineales{order}(100);Anaerolineaceae{family}(100);{genus}(100);uncultured_Gemmatimonadetes_bacterium{species}(100)	Bacteria	Chloroflexi	Anaerolineae	Anaerolineales	Anaerolineaceae		uncultured_Gemmatimonadetes_bacterium
ASV265	0	31	0	37	0	0	0	3	4	54	41	34	3	309	151	446	47	1160	Bacteria{superkingdom}(100);Proteobacteria{phylum}(100);Alphaproteobacteria{class}(100);Rhizobiales{order}(100);Methylobacteriaceae{family}(100);Microvirga{genus}(100);Unassigned{species}(0)	Bacteria	Proteobacteria	Alphaproteobacteria	Rhizobiales	Methylobacteriaceae	Microvirga	Unassigned
ASV266	171	0	24	265	287	38	0	32	34	107	0	24	9	0	0	47	0	1038	Bacteria{superkingdom}(100);Proteobacteria{phylum}(100);Alphaproteobacteria{class}(100);Rhodospirillales{order}(100);{family}(100);Reyranella{genus}(100);Unassigned{species}(0)	Bacteria	Proteobacteria	Alphaproteobacteria	Rhodospirillales		Reyranella	Unassigned
ASV267	162	0	40	215	10125	21	39	0	15	9	8	46	0	6	0	0	0	10686	Bacteria{superkingdom}(100);Bacteroidetes{phylum}(100);Flavobacteriia{class}(100);Flavobacteriales{order}(100);Flavobacteriaceae{family}(100);Flavobacterium{genus}(100);Unassigned{species}(0)	Bacteria	Bacteroidetes	Flavobacteriia	Flavobacteriales	Flavobacteriaceae	Flavobacterium	Unassigned
ASV268	101	0	41	50	76	46	68	161	39	287	283	153	267	234	1191	42	180	3219	Bacteria{superkingdom}(100);{phylum}(100);{class}(100);{order}(100);{family}(100);{genus}(100);uncultured_Actinomyces_sp.{species}(100)	Bacteria						uncultured_Actinomyces_sp.
ASV269	20	94	19	26	0	941	0	0	0	314	0	0	0	0	0	0	0	1414	Bacteria{superkingdom}(87);Actinobacteria{phylum}(87);Actinobacteria{class}(87);Actinomycetales{order}(87);Pseudonocardiaceae{family}(87);Kibdelosporangium{genus}(87);uncultured_bacterium{species}(87)	Bacteria	Actinobacteria	Actinobacteria	Actinomycetales	Pseudonocardiaceae	Kibdelosporangium	uncultured_bacterium
ASV270	141	261	132	144	266	137	101	57	108	84	52	122	81	41	0	58	60	1845	Bacteria{superkingdom}(100);Proteobacteria{phylum}(100);Unassigned{class}(0);Unassigned{order}(0);Unassigned{family}(0);Unassigned{genus}(0);Unassigned{species}(0)	Bacteria	Proteobacteria	Unassigned	Unassigned	Unassigned	Unassigned	Unassigned
ASV271	115	0	210	99	423	359	36	0	0	0	0	0	22	0	0	53	31	1348	Bacteria{superkingdom}(98);Chloroflexi{phylum}(98);Anaerolineae{class}(98);Anaerolineales{order}(98);Anaerolineaceae{family}(98);{genus}(98);uncultured_soil_bacterium{species}(98)	Bacteria	Chloroflexi	Anaerolineae	Anaerolineales	Anaerolineaceae		uncultured_soil_bacterium
ASV272	478	362	89	26	499	226	69	18	64	23	41	11	26	0	0	34	22	1988	Bacteria{superkingdom}(98);Nitrospirae{phylum}(98);Nitrospira{class}(98);Nitrospirales{order}(98);Nitrospiraceae{family}(98);Nitrospira{genus}(98);uncultured_Nitrospiraceae_bacterium{species}(98)	Bacteria	Nitrospirae	Nitrospira	Nitrospirales	Nitrospiraceae	Nitrospira	uncultured_Nitrospiraceae_bacterium
ASV273	76	0	36	0	108	167	0	0	0	0	0	0	0	0	0	0	0	387	Bacteria{superkingdom}(100);Proteobacteria{phylum}(100);Alphaproteobacteria{class}(100);Rhizobiales{order}(100);Hyphomicrobiaceae{family}(100);Pedomicrobium{genus}(100);Unassigned{species}(0)	Bacteria	Proteobacteria	Alphaproteobacteria	Rhizobiales	Hyphomicrobiaceae	Pedomicrobium	Unassigned
ASV274	0	0	0	86	229	0	0	0	0	0	0	0	0	0	0	0	0	315	Bacteria{superkingdom}(83);Actinobacteria{phylum}(83);Actinobacteria{class}(83);Actinomycetales{order}(83);Pseudonocardiaceae{family}(83);Unassigned{genus}(0);Unassigned{species}(0)	Bacteria	Actinobacteria	Actinobacteria	Actinomycetales	Pseudonocardiaceae	Unassigned	Unassigned
ASV275	0	0	0	0	0	0	0	0	0	0	0	21	0	0	7	0	0	28	Bacteria{superkingdom}(99);Proteobacteria{phylum}(99);Gammaproteobacteria{class}(99);Pseudomonadales{order}(99);Pseudomonadaceae{family}(99);Pseudomonas{genus}(99);Unassigned{species}(0)	Bacteria	Proteobacteria	Gammaproteobacteria	Pseudomonadales	Pseudomonadaceae	Pseudomonas	Unassigned
ASV276	119	0	86	97	165	102	63	103	143	406	195	195	0	69	92	62	456	2353	Bacteria{superkingdom}(93);Chloroflexi{phylum}(93);Anaerolineae{class}(93);Anaerolineales{order}(93);Anaerolineaceae{family}(93);{genus}(93);uncultured_Caldilineales_bacterium{species}(93)	Bacteria	Chloroflexi	Anaerolineae	Anaerolineales	Anaerolineaceae		uncultured_Caldilineales_bacterium
ASV277	222	0	41	56	0	71	34	122	38	304	0	232	0	0	112	492	118	1842	Bacteria{superkingdom}(81);Actinobacteria{phylum}(81);Actinobacteria{class}(81);Solirubrobacterales{order}(81);Conexibacteraceae{family}(81);Conexibacter{genus}(81);Unassigned{species}(0)	Bacteria	Actinobacteria	Actinobacteria	Solirubrobacterales	Conexibacteraceae	Conexibacter	Unassigned
ASV278	86	189	0	46	55	0	0	24	723	228	0	30	25	29	0	37	16	1488	Bacteria{superkingdom}(96);Proteobacteria{phylum}(96);Alphaproteobacteria{class}(96);Rhizobiales{order}(96);{family}(96);{genus}(96);uncultured_endolithic_bacterium{species}(96)	Bacteria	Proteobacteria	Alphaproteobacteria	Rhizobiales			uncultured_endolithic_bacterium
ASV279	79	176	96	44	461	88	66	35	82	82	64	61	156	65	59	93	345	2052	Bacteria{superkingdom}(98);Acidobacteria{phylum}(98);Acidobacteria_Gp3{class}(98);{order}(98);{family}(98);Gp3{genus}(98);Unassigned{species}(0)	Bacteria	Acidobacteria	Acidobacteria_Gp3			Gp3	Unassigned
ASV280	129	0	72	321	227	167	0	0	0	0	0	0	0	0	0	0	0	916	Bacteria{superkingdom}(100);Proteobacteria{phylum}(100);Gammaproteobacteria{class}(100);Xanthomonadales{order}(100);Xanthomonadaceae{family}(100);Lysobacter{genus}(100);Unassigned{species}(0)	Bacteria	Proteobacteria	Gammaproteobacteria	Xanthomonadales	Xanthomonadaceae	Lysobacter	Unassigned
ASV281	108	72	39	32	193	281	0	0	0	0	0	0	0	0	0	53	0	778	Bacteria{superkingdom}(83);Acidobacteria{phylum}(83);Acidobacteria_Gp3{class}(83);{order}(83);{family}(83);{genus}(83);uncultured_Candidatus_Solibacter_sp.{species}(83)	Bacteria	Acidobacteria	Acidobacteria_Gp3				uncultured_Candidatus_Solibacter_sp.
ASV282	230	0	64	82	118	146	211	80	0	24	67	16	0	0	0	0	0	1038	Bacteria{superkingdom}(94);Proteobacteria{phylum}(94);Gammaproteobacteria{class}(94);{order}(94);{family}(94);{genus}(94);uncultured_Steroidobacter_sp.{species}(94)	Bacteria	Proteobacteria	Gammaproteobacteria				uncultured_Steroidobacter_sp.
ASV283	0	0	0	0	0	140	0	0	0	0	0	0	0	0	0	0	0	140	Bacteria{superkingdom}(87);Actinobacteria{phylum}(87);Actinobacteria{class}(87);Actinomycetales{order}(87);Pseudonocardiaceae{family}(87);Actinophytocola{genus}(87);uncultured_bacterium{species}(87)	Bacteria	Actinobacteria	Actinobacteria	Actinomycetales	Pseudonocardiaceae	Actinophytocola	uncultured_bacterium
ASV284	88	220	88	80	0	78	0	175	39	63	0	110	97	0	198	53	114	1403	Bacteria{superkingdom}(99);Proteobacteria{phylum}(99);Betaproteobacteria{class}(99);{order}(99);{family}(99);{genus}(99);Unassigned{species}(0)	Bacteria	Proteobacteria	Betaproteobacteria				Unassigned
ASV285	63	29	45	407	110	198	0	0	0	0	0	0	0	0	0	0	0	852	Bacteria{superkingdom}(100);Actinobacteria{phylum}(100);Actinobacteria{class}(100);Actinomycetales{order}(100);Pseudonocardiaceae{family}(100);Pseudonocardia{genus}(100);Unassigned{species}(0)	Bacteria	Actinobacteria	Actinobacteria	Actinomycetales	Pseudonocardiaceae	Pseudonocardia	Unassigned
ASV286	565	0	129	163	780	81	8	0	0	0	0	0	174	0	0	0	42	1942	Bacteria{superkingdom}(100);Bacteroidetes{phylum}(100);Cytophagia{class}(100);Cytophagales{order}(100);{family}(100);Ohtaekwangia{genus}(100);Unassigned{species}(0)	Bacteria	Bacteroidetes	Cytophagia	Cytophagales		Ohtaekwangia	Unassigned
ASV287	44	250	0	14	103	213	0	0	0	11	0	0	54	0	0	0	5	694	Bacteria{superkingdom}(85);Actinobacteria{phylum}(85);Actinobacteria{class}(85);Acidimicrobiales{order}(85);Iamiaceae{family}(85);{genus}(85);uncultured_Iamia_sp.{species}(85)	Bacteria	Actinobacteria	Actinobacteria	Acidimicrobiales	Iamiaceae		uncultured_Iamia_sp.
ASV288	301	155	153	48	86	50	309	46	224	114	93	202	0	0	4	27	0	1812	Bacteria{superkingdom}(100);Actinobacteria{phylum}(100);Actinobacteria{class}(100);Actinomycetales{order}(100);Intrasporangiaceae{family}(100);Unassigned{genus}(0);Unassigned{species}(0)	Bacteria	Actinobacteria	Actinobacteria	Actinomycetales	Intrasporangiaceae	Unassigned	Unassigned
ASV289	162	199	0	0	170	0	83	46	8	51	0	120	0	0	18	63	61	981	Bacteria{superkingdom}(99);Acidobacteria{phylum}(99);Acidobacteria_Gp6{class}(99);{order}(99);{family}(99);Gp6{genus}(99);Unassigned{species}(0)	Bacteria	Acidobacteria	Acidobacteria_Gp6			Gp6	Unassigned
ASV290	0	51	16	44	88	72	30	0	0	0	0	0	97	16	0	0	9	423	Bacteria{superkingdom}(100);Actinobacteria{phylum}(100);Actinobacteria{class}(100);Solirubrobacterales{order}(100);Conexibacteraceae{family}(100);Conexibacter{genus}(100);Unassigned{species}(0)	Bacteria	Actinobacteria	Actinobacteria	Solirubrobacterales	Conexibacteraceae	Conexibacter	Unassigned
ASV291	369	0	17	59	297	25	0	26	21	28	0	15	284	0	23	28	49	1241	Bacteria{superkingdom}(86);Bacteroidetes{phylum}(86);Sphingobacteriia{class}(86);Sphingobacteriales{order}(86);Chitinophagaceae{family}(86);Niastella{genus}(86);uncultured_bacterium{species}(86)	Bacteria	Bacteroidetes	Sphingobacteriia	Sphingobacteriales	Chitinophagaceae	Niastella	uncultured_bacterium
ASV292	0	0	59	0	353	270	0	0	0	0	0	0	0	0	0	0	0	682	Bacteria{superkingdom}(100);Proteobacteria{phylum}(100);Alphaproteobacteria{class}(100);Rhizobiales{order}(100);Rhizobiaceae{family}(100);Ensifer{genus}(100);Unassigned{species}(0)	Bacteria	Proteobacteria	Alphaproteobacteria	Rhizobiales	Rhizobiaceae	Ensifer	Unassigned
ASV293	110	594	50	70	83	58	41	76	62	119	70	105	148	21	93	25	78	1803	Bacteria{superkingdom}(84);Proteobacteria{phylum}(84);Betaproteobacteria{class}(84);{order}(84);{family}(84);{genus}(84);uncultured_Burkholderiaceae_bacterium{species}(84)	Bacteria	Proteobacteria	Betaproteobacteria				uncultured_Burkholderiaceae_bacterium
ASV294	0	0	0	72	0	0	0	23	23	224	48	333	0	958	28	349	0	2058	Bacteria{superkingdom}(98);Actinobacteria{phylum}(98);Actinobacteria{class}(98);Actinomycetales{order}(98);Streptomycetaceae{family}(98);Streptomyces{genus}(98);Unassigned{species}(0)	Bacteria	Actinobacteria	Actinobacteria	Actinomycetales	Streptomycetaceae	Streptomyces	Unassigned
ASV295	211	97	294	0	219	80	77	14	33	0	21	0	23	0	0	0	0	1069	Bacteria{superkingdom}(100);Proteobacteria{phylum}(100);Alphaproteobacteria{class}(100);Rhizobiales{order}(100);Rhizobiaceae{family}(100);Ensifer{genus}(100);Unassigned{species}(0)	Bacteria	Proteobacteria	Alphaproteobacteria	Rhizobiales	Rhizobiaceae	Ensifer	Unassigned
ASV296	0	145	49	0	377	890	12	0	0	0	42	0	0	29	0	0	13	1557	Bacteria{superkingdom}(99);Acidobacteria{phylum}(99);Acidobacteria_Gp4{class}(99);{order}(99);{family}(99);Aridibacter{genus}(99);Unassigned{species}(0)	Bacteria	Acidobacteria	Acidobacteria_Gp4			Aridibacter	Unassigned
ASV297	117	44	61	70	242	77	135	21	160	142	120	40	83	65	0	0	37	1414	Bacteria{superkingdom}(100);Proteobacteria{phylum}(100);Deltaproteobacteria{class}(100);{order}(100);{family}(100);{genus}(100);uncultured_Acidobacteriales_bacterium{species}(100)	Bacteria	Proteobacteria	Deltaproteobacteria				uncultured_Acidobacteriales_bacterium
ASV298	194	106	54	76	175	67	134	77	84	227	47	77	169	17	9	33	18	1564	Bacteria{superkingdom}(100);Firmicutes{phylum}(100);Bacilli{class}(100);Bacillales{order}(100);Bacillaceae_1{family}(100);Bacillus{genus}(100);Unassigned{species}(0)	Bacteria	Firmicutes	Bacilli	Bacillales	Bacillaceae_1	Bacillus	Unassigned
ASV299	25	0	0	0	0	0	0	0	161	34	27	1059	33	115	0	0	21	1475	Bacteria{superkingdom}(100);Acidobacteria{phylum}(100);Acidobacteria_Gp4{class}(100);{order}(100);{family}(100);Gp4{genus}(100);Unassigned{species}(0)	Bacteria	Acidobacteria	Acidobacteria_Gp4			Gp4	Unassigned
ASV300	62	0	0	30	0	0	0	121	0	29	0	84	46	570	72	670	42	1726	Bacteria{superkingdom}(99);Actinobacteria{phylum}(99);Actinobacteria{class}(99);{order}(99);{family}(99);{genus}(99);uncultured_Actinomycetales_bacterium{species}(99)	Bacteria	Actinobacteria	Actinobacteria				uncultured_Actinomycetales_bacterium
ASV301	77	0	134	192	140	0	0	0	0	0	0	0	0	0	0	0	0	543	Bacteria{superkingdom}(100);Proteobacteria{phylum}(100);Alphaproteobacteria{class}(100);Rhizobiales{order}(100);Rhizobiaceae{family}(100);Ensifer{genus}(100);Unassigned{species}(0)	Bacteria	Proteobacteria	Alphaproteobacteria	Rhizobiales	Rhizobiaceae	Ensifer	Unassigned
ASV302	110	0	107	268	118	0	152	0	96	0	63	73	0	0	0	0	0	987	Bacteria{superkingdom}(100);Actinobacteria{phylum}(100);Actinobacteria{class}(100);Actinomycetales{order}(100);Nocardioidaceae{family}(100);Nocardioides{genus}(100);Unassigned{species}(0)	Bacteria	Actinobacteria	Actinobacteria	Actinomycetales	Nocardioidaceae	Nocardioides	Unassigned
ASV304	50	0	0	79	178	71	0	0	0	0	0	0	0	0	0	0	0	378	Bacteria{superkingdom}(100);Acidobacteria{phylum}(100);Acidobacteria_Gp6{class}(100);{order}(100);{family}(100);Gp6{genus}(100);Unassigned{species}(0)	Bacteria	Acidobacteria	Acidobacteria_Gp6			Gp6	Unassigned
ASV306	216	119	246	75	240	129	152	16	32	24	104	72	0	0	6	0	18	1449	Bacteria{superkingdom}(100);Chloroflexi{phylum}(100);Chloroflexia{class}(100);{order}(100);{family}(100);{genus}(100);uncultured_soil_bacterium{species}(100)	Bacteria	Chloroflexi	Chloroflexia				uncultured_soil_bacterium
ASV307	51	22	7	76	115	134	0	0	0	0	0	0	40	0	0	0	7	452	Bacteria{superkingdom}(100);Proteobacteria{phylum}(100);Alphaproteobacteria{class}(100);Rhodospirillales{order}(100);Rhodospirillaceae{family}(100);Inquilinus{genus}(100);Unassigned{species}(0)	Bacteria	Proteobacteria	Alphaproteobacteria	Rhodospirillales	Rhodospirillaceae	Inquilinus	Unassigned
ASV308	151	79	78	64	113	84	52	119	94	120	138	140	307	138	0	84	173	1934	Bacteria{superkingdom}(82);Proteobacteria{phylum}(82);Alphaproteobacteria{class}(82);Rhodospirillales{order}(82);Rhodospirillaceae{family}(82);{genus}(82);Unassigned{species}(0)	Bacteria	Proteobacteria	Alphaproteobacteria	Rhodospirillales	Rhodospirillaceae		Unassigned
ASV309	35	0	0	0	0	0	0	0	0	0	0	0	0	0	0	0	0	35	Bacteria{superkingdom}(100);Acidobacteria{phylum}(100);Acidobacteria_Gp10{class}(100);{order}(100);{family}(100);Gp10{genus}(100);Unassigned{species}(0)	Bacteria	Acidobacteria	Acidobacteria_Gp10			Gp10	Unassigned
ASV310	159	207	134	129	303	162	173	81	135	146	29	34	0	0	0	0	12	1704	Bacteria{superkingdom}(100);Gemmatimonadetes{phylum}(100);Gemmatimonadetes{class}(100);Gemmatimonadales{order}(100);Gemmatimonadaceae{family}(100);Gemmatimonas{genus}(100);Unassigned{species}(0)	Bacteria	Gemmatimonadetes	Gemmatimonadetes	Gemmatimonadales	Gemmatimonadaceae	Gemmatimonas	Unassigned
ASV311	393	46	0	0	1382	0	112	0	0	0	0	0	0	0	0	0	0	1933	Bacteria{superkingdom}(100);Bacteroidetes{phylum}(100);Sphingobacteriia{class}(100);Sphingobacteriales{order}(100);Chitinophagaceae{family}(100);Chitinophaga{genus}(100);Unassigned{species}(0)	Bacteria	Bacteroidetes	Sphingobacteriia	Sphingobacteriales	Chitinophagaceae	Chitinophaga	Unassigned
ASV312	27	263	0	0	0	0	0	0	0	0	0	13	0	0	0	47	0	350	Bacteria{superkingdom}(94);Acidobacteria{phylum}(94);Acidobacteria_Gp4{class}(94);{order}(94);{family}(94);Aridibacter{genus}(94);Unassigned{species}(0)	Bacteria	Acidobacteria	Acidobacteria_Gp4			Aridibacter	Unassigned
ASV313	233	103	142	0	0	49	53	0	0	0	0	0	0	0	0	39	0	619	Bacteria{superkingdom}(99);Actinobacteria{phylum}(99);Actinobacteria{class}(99);Actinomycetales{order}(99);Streptomycetaceae{family}(99);Streptomyces{genus}(99);Unassigned{species}(0)	Bacteria	Actinobacteria	Actinobacteria	Actinomycetales	Streptomycetaceae	Streptomyces	Unassigned
ASV314	108	220	31	47	62	23	0	0	0	319	67	33	0	0	0	363	0	1273	Bacteria{superkingdom}(100);Proteobacteria{phylum}(100);Alphaproteobacteria{class}(100);Rhizobiales{order}(100);{family}(100);{genus}(100);uncultured_endolithic_bacterium{species}(100)	Bacteria	Proteobacteria	Alphaproteobacteria	Rhizobiales			uncultured_endolithic_bacterium
ASV315	158	174	29	62	0	94	517	281	216	129	53	41	0	63	46	108	39	2010	Bacteria{superkingdom}(100);Actinobacteria{phylum}(100);Actinobacteria{class}(100);Gaiellales{order}(100);Gaiellaceae{family}(100);Gaiella{genus}(100);Unassigned{species}(0)	Bacteria	Actinobacteria	Actinobacteria	Gaiellales	Gaiellaceae	Gaiella	Unassigned
ASV316	442	76	69	95	211	46	166	156	332	128	29	96	0	0	0	0	0	1846	Bacteria{superkingdom}(100);Chloroflexi{phylum}(100);Chloroflexia{class}(100);{order}(100);{family}(100);{genus}(100);uncultured_bacterium{species}(100)	Bacteria	Chloroflexi	Chloroflexia				uncultured_bacterium
ASV317	1777	83	127	0	0	0	306	0	0	0	0	0	0	0	0	0	0	2293	Bacteria{superkingdom}(100);Bacteroidetes{phylum}(100);Sphingobacteriia{class}(100);Sphingobacteriales{order}(100);Chitinophagaceae{family}(100);Chitinophaga{genus}(100);Unassigned{species}(0)	Bacteria	Bacteroidetes	Sphingobacteriia	Sphingobacteriales	Chitinophagaceae	Chitinophaga	Unassigned
ASV318	115	145	86	13	163	216	160	250	186	69	82	58	100	0	7	71	18	1739	Bacteria{superkingdom}(80);Chloroflexi{phylum}(80);Thermomicrobia{class}(80);Sphaerobacterales{order}(80);Sphaerobacteraceae{family}(80);Nitrolancea{genus}(80);Unassigned{species}(0)	Bacteria	Chloroflexi	Thermomicrobia	Sphaerobacterales	Sphaerobacteraceae	Nitrolancea	Unassigned
ASV319	162	411	157	116	324	123	10	0	36	35	8	68	0	24	7	52	0	1533	Bacteria{superkingdom}(100);Chloroflexi{phylum}(100);Thermomicrobia{class}(100);Sphaerobacterales{order}(100);Sphaerobacteraceae{family}(100);{genus}(100);Unassigned{species}(0)	Bacteria	Chloroflexi	Thermomicrobia	Sphaerobacterales	Sphaerobacteraceae		Unassigned
ASV320	14	74	24	7	14	0	0	0	0	10	0	772	0	28	11	16	11	981	Bacteria{superkingdom}(97);Proteobacteria{phylum}(97);Betaproteobacteria{class}(97);Burkholderiales{order}(97);Oxalobacteraceae{family}(97);Massilia{genus}(97);Unassigned{species}(0)	Bacteria	Proteobacteria	Betaproteobacteria	Burkholderiales	Oxalobacteraceae	Massilia	Unassigned
ASV321	101	0	0	0	0	0	0	0	0	0	0	0	0	0	0	20	0	121	Bacteria{superkingdom}(100);Bacteroidetes{phylum}(100);Sphingobacteriia{class}(100);Sphingobacteriales{order}(100);Chitinophagaceae{family}(100);{genus}(100);uncultured_Cytophaga_sp.{species}(100)	Bacteria	Bacteroidetes	Sphingobacteriia	Sphingobacteriales	Chitinophagaceae		uncultured_Cytophaga_sp.
ASV322	43	0	17	60	64	97	98	70	21	50	29	32	0	88	3	4	6	682	Bacteria{superkingdom}(100);Actinobacteria{phylum}(100);Actinobacteria{class}(100);Actinomycetales{order}(100);Micromonosporaceae{family}(100);Unassigned{genus}(0);Unassigned{species}(0)	Bacteria	Actinobacteria	Actinobacteria	Actinomycetales	Micromonosporaceae	Unassigned	Unassigned
ASV323	175	0	177	0	0	0	227	735	268	53	107	210	29	0	25	68	149	2223	Bacteria{superkingdom}(97);Actinobacteria{phylum}(97);Actinobacteria{class}(97);{order}(97);{family}(97);{genus}(97);uncultured_Acidothermaceae_bacterium{species}(97)	Bacteria	Actinobacteria	Actinobacteria				uncultured_Acidothermaceae_bacterium
ASV324	146	0	56	38	130	256	83	5	0	0	0	0	12	0	15	0	0	741	Bacteria{superkingdom}(100);Gemmatimonadetes{phylum}(100);Gemmatimonadetes{class}(100);Gemmatimonadales{order}(100);Gemmatimonadaceae{family}(100);Gemmatimonas{genus}(100);Unassigned{species}(0)	Bacteria	Gemmatimonadetes	Gemmatimonadetes	Gemmatimonadales	Gemmatimonadaceae	Gemmatimonas	Unassigned
ASV325	193	95	75	58	133	88	116	25	97	28	107	0	30	0	0	23	0	1068	Bacteria{superkingdom}(99);Proteobacteria{phylum}(99);Deltaproteobacteria{class}(99);{order}(99);{family}(99);{genus}(99);Unassigned{species}(0)	Bacteria	Proteobacteria	Deltaproteobacteria				Unassigned
ASV326	146	0	40	51	253	78	56	120	57	302	0	55	0	43	0	25	0	1226	Bacteria{superkingdom}(99);Proteobacteria{phylum}(99);Alphaproteobacteria{class}(99);Rhizobiales{order}(99);Hyphomicrobiaceae{family}(99);Hyphomicrobium{genus}(99);Unassigned{species}(0)	Bacteria	Proteobacteria	Alphaproteobacteria	Rhizobiales	Hyphomicrobiaceae	Hyphomicrobium	Unassigned
ASV327	7	117	9	0	23	0	47	54	77	139	21	74	16	291	157	227	22	1281	Bacteria{superkingdom}(100);{phylum}(100);{class}(100);{order}(100);{family}(100);{genus}(100);uncultured_candidate_division_WYO_bacterium{species}(100)	Bacteria						uncultured_candidate_division_WYO_bacterium
ASV328	0	0	103	73	130	88	0	0	0	0	0	0	0	0	0	0	0	394	Bacteria{superkingdom}(98);Proteobacteria{phylum}(98);Alphaproteobacteria{class}(98);Rhizobiales{order}(98);Rhizobiaceae{family}(98);Rhizobium{genus}(98);Unassigned{species}(0)	Bacteria	Proteobacteria	Alphaproteobacteria	Rhizobiales	Rhizobiaceae	Rhizobium	Unassigned
ASV329	245	0	0	0	337	362	0	0	0	0	0	0	0	0	0	0	0	944	Bacteria{superkingdom}(85);Proteobacteria{phylum}(85);Alphaproteobacteria{class}(85);Rhizobiales{order}(85);Hyphomicrobiaceae{family}(85);Hyphomicrobium{genus}(85);Unassigned{species}(0)	Bacteria	Proteobacteria	Alphaproteobacteria	Rhizobiales	Hyphomicrobiaceae	Hyphomicrobium	Unassigned
ASV330	118	103	51	119	668	146	7	5	6	0	9	11	6	16	9	25	5	1304	Bacteria{superkingdom}(100);Actinobacteria{phylum}(100);Actinobacteria{class}(100);Acidimicrobiales{order}(100);Iamiaceae{family}(100);Iamia{genus}(100);uncultured_bacterium{species}(100)	Bacteria	Actinobacteria	Actinobacteria	Acidimicrobiales	Iamiaceae	Iamia	uncultured_bacterium
ASV331	226	976	63	0	237	0	88	1143	463	55	0	108	0	0	0	0	0	3359	Bacteria{superkingdom}(99);Chloroflexi{phylum}(99);Unassigned{class}(0);Unassigned{order}(0);Unassigned{family}(0);Unassigned{genus}(0);Unassigned{species}(0)	Bacteria	Chloroflexi	Unassigned	Unassigned	Unassigned	Unassigned	Unassigned
ASV332	168	0	107	56	521	44	58	72	60	0	47	88	326	194	0	31	377	2149	Bacteria{superkingdom}(94);Planctomycetes{phylum}(94);Planctomycetia{class}(94);Planctomycetales{order}(94);Planctomycetaceae{family}(94);Gimesia{genus}(94);uncultured_Planctomyces_sp.{species}(94)	Bacteria	Planctomycetes	Planctomycetia	Planctomycetales	Planctomycetaceae	Gimesia	uncultured_Planctomyces_sp.
ASV333	114	27	141	288	486	351	13	0	0	0	0	25	10	18	36	25	0	1534	Bacteria{superkingdom}(100);Bacteroidetes{phylum}(100);Sphingobacteriia{class}(100);Sphingobacteriales{order}(100);Chitinophagaceae{family}(100);Ferruginibacter{genus}(100);Unassigned{species}(0)	Bacteria	Bacteroidetes	Sphingobacteriia	Sphingobacteriales	Chitinophagaceae	Ferruginibacter	Unassigned
ASV334	0	42	0	0	0	0	0	0	0	0	0	0	0	0	0	0	0	42	Bacteria{superkingdom}(90);Actinobacteria{phylum}(90);Actinobacteria{class}(90);Actinomycetales{order}(90);Pseudonocardiaceae{family}(90);Amycolatopsis{genus}(90);Unassigned{species}(0)	Bacteria	Actinobacteria	Actinobacteria	Actinomycetales	Pseudonocardiaceae	Amycolatopsis	Unassigned
ASV335	115	11	47	59	219	58	20	15	25	58	0	35	123	51	42	38	53	969	Bacteria{superkingdom}(100);Proteobacteria{phylum}(100);Alphaproteobacteria{class}(100);Rhizobiales{order}(100);Hyphomicrobiaceae{family}(100);Devosia{genus}(100);Unassigned{species}(0)	Bacteria	Proteobacteria	Alphaproteobacteria	Rhizobiales	Hyphomicrobiaceae	Devosia	Unassigned
ASV337	136	129	62	178	0	0	71	113	45	254	74	124	0	11	42	51	18	1308	Bacteria{superkingdom}(99);Chloroflexi{phylum}(99);Thermomicrobia{class}(99);Sphaerobacterales{order}(99);Sphaerobacteraceae{family}(99);Unassigned{genus}(0);Unassigned{species}(0)	Bacteria	Chloroflexi	Thermomicrobia	Sphaerobacterales	Sphaerobacteraceae	Unassigned	Unassigned
ASV338	461	0	0	0	276	473	0	0	0	0	0	0	0	0	0	0	0	1210	Bacteria{superkingdom}(82);Proteobacteria{phylum}(82);Deltaproteobacteria{class}(82);Myxococcales{order}(82);Kofleriaceae{family}(82);Kofleria{genus}(82);Kofleria_flava{species}(82)	Bacteria	Proteobacteria	Deltaproteobacteria	Myxococcales	Kofleriaceae	Kofleria	Kofleria_flava
ASV339	0	0	0	0	214	133	0	0	0	0	0	0	0	0	0	0	0	347	Bacteria{superkingdom}(97);Planctomycetes{phylum}(97);Planctomycetia{class}(97);Planctomycetales{order}(97);Planctomycetaceae{family}(97);{genus}(97);Planctomyces_sp.{species}(97)	Bacteria	Planctomycetes	Planctomycetia	Planctomycetales	Planctomycetaceae		Planctomyces_sp.
ASV340	136	58	86	146	282	0	34	0	19	8	0	0	0	97	52	27	7	952	Bacteria{superkingdom}(100);Actinobacteria{phylum}(100);Actinobacteria{class}(100);Actinomycetales{order}(100);Nocardioidaceae{family}(100);Nocardioides{genus}(100);Unassigned{species}(0)	Bacteria	Actinobacteria	Actinobacteria	Actinomycetales	Nocardioidaceae	Nocardioides	Unassigned
ASV341	167	0	253	110	181	97	0	0	0	94	0	56	0	80	19	95	0	1152	Bacteria{superkingdom}(100);Chloroflexi{phylum}(100);{class}(100);{order}(100);{family}(100);{genus}(100);uncultured_Anaerolineae_bacterium{species}(100)	Bacteria	Chloroflexi					uncultured_Anaerolineae_bacterium
ASV342	24	0	8	42	45	36	26	48	53	76	114	88	337	79	194	25	100	1295	Bacteria{superkingdom}(99);Proteobacteria{phylum}(99);Betaproteobacteria{class}(99);Burkholderiales{order}(99);Comamonadaceae{family}(99);Unassigned{genus}(0);Unassigned{species}(0)	Bacteria	Proteobacteria	Betaproteobacteria	Burkholderiales	Comamonadaceae	Unassigned	Unassigned
ASV343	236	232	165	46	0	0	0	0	0	549	0	0	0	53	0	0	0	1281	Bacteria{superkingdom}(100);Acidobacteria{phylum}(100);Acidobacteria_Gp10{class}(100);{order}(100);{family}(100);Gp10{genus}(100);Unassigned{species}(0)	Bacteria	Acidobacteria	Acidobacteria_Gp10			Gp10	Unassigned
ASV344	55	142	143	0	175	117	223	33	191	0	0	32	0	0	0	0	0	1111	Bacteria{superkingdom}(96);Chloroflexi{phylum}(96);Anaerolineae{class}(96);Anaerolineales{order}(96);Anaerolineaceae{family}(96);{genus}(96);uncultured_soil_bacterium{species}(96)	Bacteria	Chloroflexi	Anaerolineae	Anaerolineales	Anaerolineaceae		uncultured_soil_bacterium
ASV345	48	228	0	0	0	0	31	19	68	0	0	28	0	0	0	139	0	561	Bacteria{superkingdom}(100);Actinobacteria{phylum}(100);Actinobacteria{class}(100);Actinomycetales{order}(100);Streptomycetaceae{family}(100);Streptomyces{genus}(100);Unassigned{species}(0)	Bacteria	Actinobacteria	Actinobacteria	Actinomycetales	Streptomycetaceae	Streptomyces	Unassigned
ASV346	70	464	13	32	81	24	50	16	10	80	36	36	11	140	148	160	18	1389	Bacteria{superkingdom}(100);Acidobacteria{phylum}(100);Acidobacteria_Gp6{class}(100);{order}(100);{family}(100);Gp6{genus}(100);Unassigned{species}(0)	Bacteria	Acidobacteria	Acidobacteria_Gp6			Gp6	Unassigned
ASV347	70	22	50	156	407	21	15	15	14	13	15	10	54	40	21	0	39	962	Bacteria{superkingdom}(100);Chloroflexi{phylum}(100);Caldilineae{class}(100);Caldilineales{order}(100);Caldilineaceae{family}(100);Litorilinea{genus}(100);Unassigned{species}(0)	Bacteria	Chloroflexi	Caldilineae	Caldilineales	Caldilineaceae	Litorilinea	Unassigned
ASV348	57	42	20	81	41	17	11	9	7	67	23	15	18	55	47	127	13	650	Bacteria{superkingdom}(96);Actinobacteria{phylum}(96);Actinobacteria{class}(96);Actinomycetales{order}(96);Mycobacteriaceae{family}(96);Mycobacterium{genus}(96);Unassigned{species}(0)	Bacteria	Actinobacteria	Actinobacteria	Actinomycetales	Mycobacteriaceae	Mycobacterium	Unassigned
ASV349	0	0	0	0	316	0	0	0	0	0	0	0	0	21	8	0	0	345	Bacteria{superkingdom}(100);Bacteroidetes{phylum}(100);Sphingobacteriia{class}(100);Sphingobacteriales{order}(100);Chitinophagaceae{family}(100);Chitinophaga{genus}(100);Unassigned{species}(0)	Bacteria	Bacteroidetes	Sphingobacteriia	Sphingobacteriales	Chitinophagaceae	Chitinophaga	Unassigned
ASV350	440	0	47	24	209	0	77	223	127	307	55	106	52	46	147	58	168	2086	Bacteria{superkingdom}(94);Proteobacteria{phylum}(94);Betaproteobacteria{class}(94);Burkholderiales{order}(94);Comamonadaceae{family}(94);Ramlibacter{genus}(94);Unassigned{species}(0)	Bacteria	Proteobacteria	Betaproteobacteria	Burkholderiales	Comamonadaceae	Ramlibacter	Unassigned
ASV352	0	512	58	0	741	74	27	0	263	75	0	0	61	0	59	27	0	1897	Bacteria{superkingdom}(100);Proteobacteria{phylum}(100);Alphaproteobacteria{class}(100);Rhizobiales{order}(100);Rhizobiaceae{family}(100);Rhizobium{genus}(100);Unassigned{species}(0)	Bacteria	Proteobacteria	Alphaproteobacteria	Rhizobiales	Rhizobiaceae	Rhizobium	Unassigned
ASV354	224	214	71	67	211	90	147	49	189	60	48	97	0	48	0	81	16	1612	Bacteria{superkingdom}(100);Acidobacteria{phylum}(100);Acidobacteria_Gp16{class}(100);{order}(100);{family}(100);Gp16{genus}(100);Unassigned{species}(0)	Bacteria	Acidobacteria	Acidobacteria_Gp16			Gp16	Unassigned
ASV355	94	70	181	0	105	84	643	114	126	0	0	159	0	0	0	0	91	1667	Bacteria{superkingdom}(100);Planctomycetes{phylum}(100);Planctomycetia{class}(100);Planctomycetales{order}(100);Planctomycetaceae{family}(100);Gimesia{genus}(100);Unassigned{species}(0)	Bacteria	Planctomycetes	Planctomycetia	Planctomycetales	Planctomycetaceae	Gimesia	Unassigned
ASV356	101	46	53	37	227	329	21	0	35	9	23	0	0	0	0	17	0	898	Bacteria{superkingdom}(99);Chloroflexi{phylum}(99);Caldilineae{class}(99);Caldilineales{order}(99);Caldilineaceae{family}(99);{genus}(99);uncultured_Chloroflexi_bacterium{species}(99)	Bacteria	Chloroflexi	Caldilineae	Caldilineales	Caldilineaceae		uncultured_Chloroflexi_bacterium
ASV358	27	0	0	0	0	0	33	0	38	0	0	0	0	0	0	37	0	135	Bacteria{superkingdom}(100);Proteobacteria{phylum}(100);Alphaproteobacteria{class}(100);Unassigned{order}(0);Unassigned{family}(0);Unassigned{genus}(0);Unassigned{species}(0)	Bacteria	Proteobacteria	Alphaproteobacteria	Unassigned	Unassigned	Unassigned	Unassigned
ASV359	73	201	0	1364	71	118	5	0	0	6	0	0	0	0	0	0	0	1838	Bacteria{superkingdom}(89);Actinobacteria{phylum}(89);Actinobacteria{class}(89);Actinomycetales{order}(89);Nocardioidaceae{family}(89);Nocardioides{genus}(89);Nocardioides_albus{species}(89)	Bacteria	Actinobacteria	Actinobacteria	Actinomycetales	Nocardioidaceae	Nocardioides	Nocardioides_albus
ASV360	0	0	20	92	0	0	0	0	26	13	0	17	0	0	0	0	0	168	Bacteria{superkingdom}(100);Bacteroidetes{phylum}(100);Sphingobacteriia{class}(100);Sphingobacteriales{order}(100);Chitinophagaceae{family}(100);Niastella{genus}(100);Unassigned{species}(0)	Bacteria	Bacteroidetes	Sphingobacteriia	Sphingobacteriales	Chitinophagaceae	Niastella	Unassigned
ASV361	0	0	5	0	0	0	0	0	0	1070	0	99	0	0	0	0	0	1174	Bacteria{superkingdom}(80);Acidobacteria{phylum}(80);Acidobacteria_Gp4{class}(80);{order}(80);{family}(80);Gp4{genus}(80);uncultured_Acidobacteriaceae_bacterium{species}(80)	Bacteria	Acidobacteria	Acidobacteria_Gp4			Gp4	uncultured_Acidobacteriaceae_bacterium
ASV362	0	0	0	0	0	49	0	0	169	0	0	0	0	0	0	0	0	218	Bacteria{superkingdom}(99);Proteobacteria{phylum}(99);Gammaproteobacteria{class}(99);{order}(99);{family}(99);{genus}(99);uncultured_Steroidobacter_sp.{species}(99)	Bacteria	Proteobacteria	Gammaproteobacteria				uncultured_Steroidobacter_sp.
ASV365	39	105	0	0	0	46	17	0	0	0	0	0	0	0	0	13	0	220	Bacteria{superkingdom}(100);Acidobacteria{phylum}(100);Acidobacteria_Gp6{class}(100);{order}(100);{family}(100);Gp6{genus}(100);Unassigned{species}(0)	Bacteria	Acidobacteria	Acidobacteria_Gp6			Gp6	Unassigned
ASV367	0	0	0	0	0	0	26	0	0	25	0	0	14	15	36	31	48	195	Bacteria{superkingdom}(100);Bacteroidetes{phylum}(100);Sphingobacteriia{class}(100);Sphingobacteriales{order}(100);Chitinophagaceae{family}(100);Chitinophaga{genus}(100);Unassigned{species}(0)	Bacteria	Bacteroidetes	Sphingobacteriia	Sphingobacteriales	Chitinophagaceae	Chitinophaga	Unassigned
ASV368	61	0	10	11	8	21	448	320	222	14	39	454	200	229	69	8	31	2145	Bacteria{superkingdom}(99);Actinobacteria{phylum}(99);Actinobacteria{class}(99);Actinomycetales{order}(99);Nocardioidaceae{family}(99);Nocardioides{genus}(99);Unassigned{species}(0)	Bacteria	Actinobacteria	Actinobacteria	Actinomycetales	Nocardioidaceae	Nocardioides	Unassigned
ASV369	134	0	32	0	153	127	41	0	0	0	0	0	23	0	0	95	0	605	Bacteria{superkingdom}(97);Planctomycetes{phylum}(97);Planctomycetia{class}(97);Planctomycetales{order}(97);Planctomycetaceae{family}(97);Blastopirellula{genus}(97);uncultured_bacterium{species}(97)	Bacteria	Planctomycetes	Planctomycetia	Planctomycetales	Planctomycetaceae	Blastopirellula	uncultured_bacterium
ASV370	0	0	0	0	0	0	10	0	0	0	0	0	0	0	0	0	0	10	Bacteria{superkingdom}(88);Chloroflexi{phylum}(88);Unassigned{class}(0);Unassigned{order}(0);Unassigned{family}(0);Unassigned{genus}(0);Unassigned{species}(0)	Bacteria	Chloroflexi	Unassigned	Unassigned	Unassigned	Unassigned	Unassigned
ASV371	0	0	32	87	168	0	56	0	0	0	48	0	0	0	0	0	0	391	Bacteria{superkingdom}(80);Proteobacteria{phylum}(80);Gammaproteobacteria{class}(80);Xanthomonadales{order}(80);Sinobacteraceae{family}(80);Povalibacter{genus}(80);uncultured_Burkholderiales_bacterium{species}(80)	Bacteria	Proteobacteria	Gammaproteobacteria	Xanthomonadales	Sinobacteraceae	Povalibacter	uncultured_Burkholderiales_bacterium
ASV372	95	132	78	191	103	56	0	30	13	140	0	26	0	0	0	33	0	897	Bacteria{superkingdom}(100);Actinobacteria{phylum}(100);Actinobacteria{class}(100);Rubrobacterales{order}(100);Rubrobacteraceae{family}(100);Rubrobacter{genus}(100);Unassigned{species}(0)	Bacteria	Actinobacteria	Actinobacteria	Rubrobacterales	Rubrobacteraceae	Rubrobacter	Unassigned
ASV373	193	0	64	55	76	51	52	171	178	216	23	126	0	0	35	87	152	1479	Bacteria{superkingdom}(99);Chloroflexi{phylum}(99);{class}(99);{order}(99);{family}(99);{genus}(99);Unassigned{species}(0)	Bacteria	Chloroflexi					Unassigned
ASV374	157	49	13	84	415	57	0	0	0	0	0	0	32	36	46	31	28	948	Bacteria{superkingdom}(92);Proteobacteria{phylum}(92);Alphaproteobacteria{class}(92);Rhizobiales{order}(92);Hyphomicrobiaceae{family}(92);Devosia{genus}(92);Unassigned{species}(0)	Bacteria	Proteobacteria	Alphaproteobacteria	Rhizobiales	Hyphomicrobiaceae	Devosia	Unassigned
ASV375	0	0	0	0	300	0	0	21	0	17	0	0	0	17	10	20	0	385	Bacteria{superkingdom}(98);Proteobacteria{phylum}(98);Betaproteobacteria{class}(98);Burkholderiales{order}(98);Comamonadaceae{family}(98);Variovorax{genus}(98);Unassigned{species}(0)	Bacteria	Proteobacteria	Betaproteobacteria	Burkholderiales	Comamonadaceae	Variovorax	Unassigned
ASV376	21	0	0	158	2200	745	0	0	0	0	0	56	83	11	15	0	0	3289	Bacteria{superkingdom}(96);Bacteroidetes{phylum}(96);Sphingobacteriia{class}(96);Sphingobacteriales{order}(96);Chitinophagaceae{family}(96);{genus}(96);Unassigned{species}(0)	Bacteria	Bacteroidetes	Sphingobacteriia	Sphingobacteriales	Chitinophagaceae		Unassigned
ASV378	146	0	22	60	300	78	43	16	63	141	93	84	52	36	52	31	52	1269	Bacteria{superkingdom}(99);Proteobacteria{phylum}(99);Alphaproteobacteria{class}(99);Rhizobiales{order}(99);{family}(99);{genus}(99);uncultured_Nordella_sp.{species}(99)	Bacteria	Proteobacteria	Alphaproteobacteria	Rhizobiales			uncultured_Nordella_sp.
ASV379	0	0	0	0	20	0	0	0	0	0	0	0	0	0	0	0	0	20	Bacteria{superkingdom}(83);Bacteroidetes{phylum}(83);Flavobacteriia{class}(83);Flavobacteriales{order}(83);Flavobacteriaceae{family}(83);Chryseobacterium{genus}(83);Chryseobacterium_hagamense{species}(83)	Bacteria	Bacteroidetes	Flavobacteriia	Flavobacteriales	Flavobacteriaceae	Chryseobacterium	Chryseobacterium_hagamense
ASV380	94	0	21	104	0	266	0	0	21	27	9	0	0	0	0	0	0	542	Bacteria{superkingdom}(86);Proteobacteria{phylum}(86);Alphaproteobacteria{class}(86);Rhizobiales{order}(86);Hyphomicrobiaceae{family}(86);Pedomicrobium{genus}(86);uncultured_alpha_proteobacterium{species}(86)	Bacteria	Proteobacteria	Alphaproteobacteria	Rhizobiales	Hyphomicrobiaceae	Pedomicrobium	uncultured_alpha_proteobacterium
ASV381	108	56	25	0	50	95	0	12	0	0	0	0	83	0	0	26	18	473	Bacteria{superkingdom}(88);Proteobacteria{phylum}(88);Alphaproteobacteria{class}(88);Rhizobiales{order}(88);Hyphomicrobiaceae{family}(88);Pedomicrobium{genus}(88);uncultured_alpha_proteobacterium{species}(88)	Bacteria	Proteobacteria	Alphaproteobacteria	Rhizobiales	Hyphomicrobiaceae	Pedomicrobium	uncultured_alpha_proteobacterium
ASV382	111	0	68	47	201	0	246	0	0	230	63	43	38	0	78	0	33	1158	Bacteria{superkingdom}(86);Firmicutes{phylum}(86);Bacilli{class}(86);Bacillales{order}(86);Bacillaceae_1{family}(86);Bacillus{genus}(86);Bacillus_funiculus{species}(86)	Bacteria	Firmicutes	Bacilli	Bacillales	Bacillaceae_1	Bacillus	Bacillus_funiculus
ASV383	65	127	48	40	91	113	19	36	47	99	50	79	133	56	160	58	96	1317	Bacteria{superkingdom}(100);Proteobacteria{phylum}(100);Alphaproteobacteria{class}(100);Rhizobiales{order}(100);Rhizobiales_incertae_sedis{family}(100);Vasilyevaea{genus}(100);Unassigned{species}(0)	Bacteria	Proteobacteria	Alphaproteobacteria	Rhizobiales	Rhizobiales_incertae_sedis	Vasilyevaea	Unassigned
ASV384	31	0	0	75	120	113	0	0	0	0	0	0	0	0	0	0	0	339	Bacteria{superkingdom}(100);Planctomycetes{phylum}(100);Planctomycetia{class}(100);Planctomycetales{order}(100);Planctomycetaceae{family}(100);{genus}(100);uncultured_Pasteuria_sp.{species}(100)	Bacteria	Planctomycetes	Planctomycetia	Planctomycetales	Planctomycetaceae		uncultured_Pasteuria_sp.
ASV385	87	79	36	50	486	123	72	170	427	167	42	60	12	35	28	34	14	1922	Bacteria{superkingdom}(82);Bacteroidetes{phylum}(82);Sphingobacteriia{class}(82);Sphingobacteriales{order}(82);Chitinophagaceae{family}(82);{genus}(82);Unassigned{species}(0)	Bacteria	Bacteroidetes	Sphingobacteriia	Sphingobacteriales	Chitinophagaceae		Unassigned
ASV386	242	0	0	0	0	258	95	0	0	0	0	0	0	0	0	0	6	601	Bacteria{superkingdom}(100);Bacteroidetes{phylum}(100);Sphingobacteriia{class}(100);Sphingobacteriales{order}(100);Chitinophagaceae{family}(100);Unassigned{genus}(0);Unassigned{species}(0)	Bacteria	Bacteroidetes	Sphingobacteriia	Sphingobacteriales	Chitinophagaceae	Unassigned	Unassigned
ASV387	110	140	67	38	55	36	45	8	0	40	103	6	68	33	0	0	54	803	Bacteria{superkingdom}(100);Proteobacteria{phylum}(100);Betaproteobacteria{class}(100);{order}(100);{family}(100);{genus}(100);Unassigned{species}(0)	Bacteria	Proteobacteria	Betaproteobacteria				Unassigned
ASV388	111	46	180	25	232	275	86	111	77	46	117	33	355	7	0	6	54	1761	Bacteria{superkingdom}(99);Chloroflexi{phylum}(99);Thermomicrobia{class}(99);Sphaerobacterales{order}(99);Sphaerobacteraceae{family}(99);Unassigned{genus}(0);Unassigned{species}(0)	Bacteria	Chloroflexi	Thermomicrobia	Sphaerobacterales	Sphaerobacteraceae	Unassigned	Unassigned
ASV389	88	14	25	245	372	102	0	11	23	10	0	14	32	0	0	54	0	990	Bacteria{superkingdom}(95);Chloroflexi{phylum}(95);Unassigned{class}(0);Unassigned{order}(0);Unassigned{family}(0);Unassigned{genus}(0);Unassigned{species}(0)	Bacteria	Chloroflexi	Unassigned	Unassigned	Unassigned	Unassigned	Unassigned
ASV390	148	0	118	70	255	0	27	11	26	36	35	48	0	0	0	0	0	774	Bacteria{superkingdom}(96);Proteobacteria{phylum}(96);Betaproteobacteria{class}(96);Burkholderiales{order}(96);Oxalobacteraceae{family}(96);Massilia{genus}(96);Unassigned{species}(0)	Bacteria	Proteobacteria	Betaproteobacteria	Burkholderiales	Oxalobacteraceae	Massilia	Unassigned
ASV391	0	19	0	0	0	0	0	0	0	0	0	0	0	0	0	0	0	19	Bacteria{superkingdom}(94);Bacteroidetes{phylum}(94);Sphingobacteriia{class}(94);Sphingobacteriales{order}(94);Chitinophagaceae{family}(94);Flavitalea{genus}(94);uncultured_Niastella_sp.{species}(94)	Bacteria	Bacteroidetes	Sphingobacteriia	Sphingobacteriales	Chitinophagaceae	Flavitalea	uncultured_Niastella_sp.
ASV392	39	172	43	54	81	0	43	47	0	29	18	66	29	53	50	63	34	821	Bacteria{superkingdom}(100);Proteobacteria{phylum}(100);Alphaproteobacteria{class}(100);Caulobacterales{order}(100);Caulobacteraceae{family}(100);Phenylobacterium{genus}(100);Unassigned{species}(0)	Bacteria	Proteobacteria	Alphaproteobacteria	Caulobacterales	Caulobacteraceae	Phenylobacterium	Unassigned
ASV393	94	19	41	153	282	247	11	45	113	0	24	5	0	0	0	0	0	1034	Bacteria{superkingdom}(100);Chloroflexi{phylum}(100);{class}(100);{order}(100);{family}(100);{genus}(100);Unassigned{species}(0)	Bacteria	Chloroflexi					Unassigned
ASV394	28	0	16	70	593	91	4	1	0	0	0	8	510	0	0	0	36	1357	Bacteria{superkingdom}(87);Chloroflexi{phylum}(87);Unassigned{class}(0);Unassigned{order}(0);Unassigned{family}(0);Unassigned{genus}(0);Unassigned{species}(0)	Bacteria	Chloroflexi	Unassigned	Unassigned	Unassigned	Unassigned	Unassigned
ASV395	66	0	615	48	0	481	17	0	0	0	0	0	0	0	0	0	0	1227	Bacteria{superkingdom}(100);Unassigned{phylum}(0);Unassigned{class}(0);Unassigned{order}(0);Unassigned{family}(0);Unassigned{genus}(0);Unassigned{species}(0)	Bacteria	Unassigned	Unassigned	Unassigned	Unassigned	Unassigned	Unassigned
ASV396	44	127	21	38	38	84	35	139	31	99	77	40	69	25	102	108	54	1131	Bacteria{superkingdom}(100);Acidobacteria{phylum}(100);Acidobacteria_Gp6{class}(100);{order}(100);{family}(100);Gp6{genus}(100);Unassigned{species}(0)	Bacteria	Acidobacteria	Acidobacteria_Gp6			Gp6	Unassigned
ASV397	93	0	43	0	175	43	148	104	202	203	155	69	280	116	16	66	133	1846	Bacteria{superkingdom}(100);Planctomycetes{phylum}(100);Planctomycetia{class}(100);Planctomycetales{order}(100);Planctomycetaceae{family}(100);Unassigned{genus}(0);Unassigned{species}(0)	Bacteria	Planctomycetes	Planctomycetia	Planctomycetales	Planctomycetaceae	Unassigned	Unassigned
ASV398	0	0	0	79	193	129	0	0	0	81	0	0	42	0	0	0	0	524	Bacteria{superkingdom}(86);Actinobacteria{phylum}(86);Actinobacteria{class}(86);Acidimicrobiales{order}(86);Iamiaceae{family}(86);{genus}(86);Unassigned{species}(0)	Bacteria	Actinobacteria	Actinobacteria	Acidimicrobiales	Iamiaceae		Unassigned
ASV399	0	0	0	30	0	0	0	0	0	134	0	115	0	54	61	257	41	692	Bacteria{superkingdom}(100);Proteobacteria{phylum}(100);Alphaproteobacteria{class}(100);Rhizobiales{order}(100);Methylobacteriaceae{family}(100);Microvirga{genus}(100);Unassigned{species}(0)	Bacteria	Proteobacteria	Alphaproteobacteria	Rhizobiales	Methylobacteriaceae	Microvirga	Unassigned
ASV400	117	53	39	0	204	33	218	85	151	21	33	44	103	15	27	26	58	1227	Bacteria{superkingdom}(93);Proteobacteria{phylum}(93);Alphaproteobacteria{class}(93);Rhizobiales{order}(93);Rhodobiaceae{family}(93);{genus}(93);Unassigned{species}(0)	Bacteria	Proteobacteria	Alphaproteobacteria	Rhizobiales	Rhodobiaceae		Unassigned
ASV401	0	83	0	13	0	0	15	0	0	15	0	15	0	0	0	5	16	162	Bacteria{superkingdom}(95);Proteobacteria{phylum}(95);Alphaproteobacteria{class}(95);Sphingomonadales{order}(95);Erythrobacteraceae{family}(95);Altererythrobacter{genus}(95);Unassigned{species}(0)	Bacteria	Proteobacteria	Alphaproteobacteria	Sphingomonadales	Erythrobacteraceae	Altererythrobacter	Unassigned
ASV402	222	0	0	57	329	94	0	0	0	0	0	0	0	0	0	0	0	702	Bacteria{superkingdom}(100);Actinobacteria{phylum}(100);Actinobacteria{class}(100);Actinomycetales{order}(100);Nocardioidaceae{family}(100);Nocardioides{genus}(100);Unassigned{species}(0)	Bacteria	Actinobacteria	Actinobacteria	Actinomycetales	Nocardioidaceae	Nocardioides	Unassigned
ASV403	107	0	52	125	105	187	83	131	105	163	0	32	101	75	0	32	55	1353	Bacteria{superkingdom}(100);Acidobacteria{phylum}(100);Acidobacteria_Gp6{class}(100);{order}(100);{family}(100);Gp6{genus}(100);Unassigned{species}(0)	Bacteria	Acidobacteria	Acidobacteria_Gp6			Gp6	Unassigned
ASV404	394	0	39	44	0	35	21	158	82	51	38	203	31	25	0	22	76	1219	Bacteria{superkingdom}(89);Actinobacteria{phylum}(89);Actinobacteria{class}(89);Solirubrobacterales{order}(89);Conexibacteraceae{family}(89);Conexibacter{genus}(89);uncultured_bacterium{species}(89)	Bacteria	Actinobacteria	Actinobacteria	Solirubrobacterales	Conexibacteraceae	Conexibacter	uncultured_bacterium
ASV406	62	0	22	118	0	472	24	0	0	0	27	0	0	0	0	0	0	725	Bacteria{superkingdom}(86);Actinobacteria{phylum}(86);Actinobacteria{class}(86);Actinomycetales{order}(86);Nocardioidaceae{family}(86);{genus}(86);Unassigned{species}(0)	Bacteria	Actinobacteria	Actinobacteria	Actinomycetales	Nocardioidaceae		Unassigned
ASV407	55	0	59	38	266	20	0	0	0	0	0	0	27	20	24	0	17	526	Bacteria{superkingdom}(100);Bacteroidetes{phylum}(100);Sphingobacteriia{class}(100);Sphingobacteriales{order}(100);Sphingobacteriaceae{family}(100);Pedobacter{genus}(100);Unassigned{species}(0)	Bacteria	Bacteroidetes	Sphingobacteriia	Sphingobacteriales	Sphingobacteriaceae	Pedobacter	Unassigned
ASV408	20	0	64	24	71	105	65	0	0	0	47	0	1216	973	207	53	58	2903	Bacteria{superkingdom}(100);Actinobacteria{phylum}(100);Actinobacteria{class}(100);Solirubrobacterales{order}(100);Unassigned{family}(0);Unassigned{genus}(0);Unassigned{species}(0)	Bacteria	Actinobacteria	Actinobacteria	Solirubrobacterales	Unassigned	Unassigned	Unassigned
ASV409	54	36	100	117	282	164	92	48	20	123	0	0	0	0	0	0	19	1055	Bacteria{superkingdom}(100);Proteobacteria{phylum}(100);Alphaproteobacteria{class}(100);Rhodospirillales{order}(100);{family}(100);Reyranella{genus}(100);Unassigned{species}(0)	Bacteria	Proteobacteria	Alphaproteobacteria	Rhodospirillales		Reyranella	Unassigned
ASV411	66	376	14	98	62	0	0	0	0	19	0	0	0	0	0	0	0	635	Bacteria{superkingdom}(80);Acidobacteria{phylum}(80);Acidobacteria_Gp10{class}(80);{order}(80);{family}(80);Gp10{genus}(80);uncultured_Pelobacter_sp.{species}(80)	Bacteria	Acidobacteria	Acidobacteria_Gp10			Gp10	uncultured_Pelobacter_sp.
ASV412	0	0	10	0	0	90	0	0	0	0	0	0	0	0	0	0	0	100	Bacteria{superkingdom}(100);Bacteroidetes{phylum}(100);Cytophagia{class}(100);Cytophagales{order}(100);{family}(100);Ohtaekwangia{genus}(100);Unassigned{species}(0)	Bacteria	Bacteroidetes	Cytophagia	Cytophagales		Ohtaekwangia	Unassigned
ASV413	0	0	23	0	250	80	13	0	0	0	11	0	11	0	0	0	0	388	Bacteria{superkingdom}(99);Bacteroidetes{phylum}(99);Sphingobacteriia{class}(99);Sphingobacteriales{order}(99);Chitinophagaceae{family}(99);Terrimonas{genus}(99);Unassigned{species}(0)	Bacteria	Bacteroidetes	Sphingobacteriia	Sphingobacteriales	Chitinophagaceae	Terrimonas	Unassigned
ASV414	164	14	102	117	269	19	2	0	3	0	0	12	0	16	0	0	21	739	Bacteria{superkingdom}(100);Planctomycetes{phylum}(100);Planctomycetia{class}(100);Planctomycetales{order}(100);Planctomycetaceae{family}(100);{genus}(100);Unassigned{species}(0)	Bacteria	Planctomycetes	Planctomycetia	Planctomycetales	Planctomycetaceae		Unassigned
ASV415	90	1240	0	0	0	136	54	0	0	0	0	0	0	0	0	0	0	1520	Bacteria{superkingdom}(100);Acidobacteria{phylum}(100);Acidobacteria_Gp4{class}(100);{order}(100);{family}(100);Gp4{genus}(100);Unassigned{species}(0)	Bacteria	Acidobacteria	Acidobacteria_Gp4			Gp4	Unassigned
ASV416	195	0	106	51	216	97	0	0	19	39	0	67	156	0	59	16	48	1069	Bacteria{superkingdom}(100);Acidobacteria{phylum}(100);Acidobacteria_Gp6{class}(100);{order}(100);{family}(100);Gp6{genus}(100);Unassigned{species}(0)	Bacteria	Acidobacteria	Acidobacteria_Gp6			Gp6	Unassigned
ASV417	25	0	0	38	439	53	0	13	0	36	0	0	29	0	0	0	0	633	Bacteria{superkingdom}(100);Proteobacteria{phylum}(100);Gammaproteobacteria{class}(100);{order}(100);{family}(100);{genus}(100);Unassigned{species}(0)	Bacteria	Proteobacteria	Gammaproteobacteria				Unassigned
ASV418	144	36	95	104	0	139	0	0	0	0	0	56	0	154	0	18	0	746	Bacteria{superkingdom}(94);Chloroflexi{phylum}(94);Thermomicrobia{class}(94);Sphaerobacterales{order}(94);Sphaerobacteraceae{family}(94);{genus}(94);uncultured_Thermomicrobium_sp.{species}(94)	Bacteria	Chloroflexi	Thermomicrobia	Sphaerobacterales	Sphaerobacteraceae		uncultured_Thermomicrobium_sp.
ASV419	110	83	51	145	222	229	10	0	44	4	0	0	23	33	73	36	47	1110	Bacteria{superkingdom}(100);Proteobacteria{phylum}(100);Alphaproteobacteria{class}(100);Caulobacterales{order}(100);Caulobacteraceae{family}(100);Phenylobacterium{genus}(100);Unassigned{species}(0)	Bacteria	Proteobacteria	Alphaproteobacteria	Caulobacterales	Caulobacteraceae	Phenylobacterium	Unassigned
ASV420	77	49	12	19	529	133	18	0	27	48	0	21	51	11	0	0	26	1021	Bacteria{superkingdom}(93);Planctomycetes{phylum}(93);Planctomycetia{class}(93);Planctomycetales{order}(93);Planctomycetaceae{family}(93);{genus}(93);Planctomyces_sp.{species}(93)	Bacteria	Planctomycetes	Planctomycetia	Planctomycetales	Planctomycetaceae		Planctomyces_sp.
ASV421	0	0	0	0	0	0	0	0	0	0	0	12	0	0	0	0	0	12	Bacteria{superkingdom}(100);Chloroflexi{phylum}(100);Chloroflexia{class}(100);Kallotenuales{order}(100);Kallotenuaceae{family}(100);Kallotenue{genus}(100);Unassigned{species}(0)	Bacteria	Chloroflexi	Chloroflexia	Kallotenuales	Kallotenuaceae	Kallotenue	Unassigned
ASV422	102	164	85	53	258	129	23	0	0	0	80	0	89	0	0	0	34	1017	Bacteria{superkingdom}(100);Bacteroidetes{phylum}(100);Cytophagia{class}(100);Cytophagales{order}(100);{family}(100);Ohtaekwangia{genus}(100);Unassigned{species}(0)	Bacteria	Bacteroidetes	Cytophagia	Cytophagales		Ohtaekwangia	Unassigned
ASV423	102	0	15	0	55	0	35	0	25	52	140	37	781	988	37	196	682	3145	Bacteria{superkingdom}(93);Actinobacteria{phylum}(93);Actinobacteria{class}(93);Solirubrobacterales{order}(93);Conexibacteraceae{family}(93);Conexibacter{genus}(93);Unassigned{species}(0)	Bacteria	Actinobacteria	Actinobacteria	Solirubrobacterales	Conexibacteraceae	Conexibacter	Unassigned
ASV424	0	185	21	66	181	0	25	20	127	0	0	55	33	36	108	55	42	954	Bacteria{superkingdom}(100);Proteobacteria{phylum}(100);Betaproteobacteria{class}(100);Burkholderiales{order}(100);Comamonadaceae{family}(100);Unassigned{genus}(0);Unassigned{species}(0)	Bacteria	Proteobacteria	Betaproteobacteria	Burkholderiales	Comamonadaceae	Unassigned	Unassigned
ASV425	169	83	0	36	34	46	0	29	0	28	0	24	51	39	37	55	41	672	Bacteria{superkingdom}(100);Actinobacteria{phylum}(100);Actinobacteria{class}(100);Actinomycetales{order}(100);Sporichthyaceae{family}(100);Sporichthya{genus}(100);Unassigned{species}(0)	Bacteria	Actinobacteria	Actinobacteria	Actinomycetales	Sporichthyaceae	Sporichthya	Unassigned
ASV426	62	31	34	111	125	81	15	86	26	174	24	14	8	0	30	0	36	857	Bacteria{superkingdom}(95);Chloroflexi{phylum}(95);{class}(95);{order}(95);{family}(95);{genus}(95);Unassigned{species}(0)	Bacteria	Chloroflexi					Unassigned
ASV427	0	0	25	0	120	0	16	61	165	188	168	250	217	74	85	27	177	1573	Bacteria{superkingdom}(100);Proteobacteria{phylum}(100);Betaproteobacteria{class}(100);Burkholderiales{order}(100);Oxalobacteraceae{family}(100);Unassigned{genus}(0);Unassigned{species}(0)	Bacteria	Proteobacteria	Betaproteobacteria	Burkholderiales	Oxalobacteraceae	Unassigned	Unassigned
ASV428	102	44	120	116	100	145	345	255	90	0	333	0	0	0	0	20	40	1710	Bacteria{superkingdom}(100);Actinobacteria{phylum}(100);Unassigned{class}(0);Unassigned{order}(0);Unassigned{family}(0);Unassigned{genus}(0);Unassigned{species}(0)	Bacteria	Actinobacteria	Unassigned	Unassigned	Unassigned	Unassigned	Unassigned
ASV429	104	26	161	122	100	159	16	0	0	13	0	15	47	114	86	45	25	1033	Bacteria{superkingdom}(90);Actinobacteria{phylum}(90);Actinobacteria{class}(90);Solirubrobacterales{order}(90);{family}(90);{genus}(90);Unassigned{species}(0)	Bacteria	Actinobacteria	Actinobacteria	Solirubrobacterales			Unassigned
ASV430	94	0	31	114	266	153	0	0	0	0	0	55	148	18	0	0	0	879	Bacteria{superkingdom}(85);Proteobacteria{phylum}(85);Betaproteobacteria{class}(85);{order}(85);{family}(85);{genus}(85);uncultured_Alcaligenaceae_bacterium{species}(85)	Bacteria	Proteobacteria	Betaproteobacteria				uncultured_Alcaligenaceae_bacterium
ASV431	79	7	0	110	64	220	0	0	0	0	0	0	98	36	0	244	0	858	Bacteria{superkingdom}(98);Proteobacteria{phylum}(98);Alphaproteobacteria{class}(98);Rhodospirillales{order}(98);Rhodospirillaceae{family}(98);Dongia{genus}(98);Unassigned{species}(0)	Bacteria	Proteobacteria	Alphaproteobacteria	Rhodospirillales	Rhodospirillaceae	Dongia	Unassigned
ASV432	0	6235	5	38	0	39	0	0	0	0	0	0	27	0	28	8	5	6385	Bacteria{superkingdom}(99);Proteobacteria{phylum}(99);Gammaproteobacteria{class}(99);Pseudomonadales{order}(99);Pseudomonadaceae{family}(99);Azotobacter{genus}(99);Unassigned{species}(0)	Bacteria	Proteobacteria	Gammaproteobacteria	Pseudomonadales	Pseudomonadaceae	Azotobacter	Unassigned
ASV433	86	0	47	68	321	311	56	0	102	0	0	67	163	0	0	0	62	1283	Bacteria{superkingdom}(96);Actinobacteria{phylum}(96);{class}(96);{order}(96);{family}(96);{genus}(96);uncultured_Rubrobacteridae_bacterium{species}(96)	Bacteria	Actinobacteria					uncultured_Rubrobacteridae_bacterium
ASV434	168	224	109	0	55	139	0	0	0	0	0	0	0	0	0	0	0	695	Bacteria{superkingdom}(100);Actinobacteria{phylum}(100);Actinobacteria{class}(100);Actinomycetales{order}(100);Pseudonocardiaceae{family}(100);Pseudonocardia{genus}(100);Unassigned{species}(0)	Bacteria	Actinobacteria	Actinobacteria	Actinomycetales	Pseudonocardiaceae	Pseudonocardia	Unassigned
ASV435	167	22	82	102	359	117	20	9	8	13	0	0	4	19	13	10	0	945	Bacteria{superkingdom}(86);Actinobacteria{phylum}(86);Actinobacteria{class}(86);Acidimicrobiales{order}(86);{family}(86);{genus}(86);uncultured_Rhodococcus_sp.{species}(86)	Bacteria	Actinobacteria	Actinobacteria	Acidimicrobiales			uncultured_Rhodococcus_sp.
ASV436	243	0	130	40	803	419	0	0	0	0	0	101	0	0	0	0	0	1736	Bacteria{superkingdom}(100);Verrucomicrobia{phylum}(100);Opitutae{class}(100);Opitutales{order}(100);Opitutaceae{family}(100);Opitutus{genus}(100);Unassigned{species}(0)	Bacteria	Verrucomicrobia	Opitutae	Opitutales	Opitutaceae	Opitutus	Unassigned
ASV437	104	692	46	17	140	35	37	0	0	0	39	44	0	15	37	20	0	1226	Bacteria{superkingdom}(100);Bacteroidetes{phylum}(100);Sphingobacteriia{class}(100);Sphingobacteriales{order}(100);Chitinophagaceae{family}(100);Flavitalea{genus}(100);Unassigned{species}(0)	Bacteria	Bacteroidetes	Sphingobacteriia	Sphingobacteriales	Chitinophagaceae	Flavitalea	Unassigned
ASV438	0	481	24	0	0	0	58	0	1923	121	0	0	91	0	0	0	0	2698	Bacteria{superkingdom}(100);Bacteroidetes{phylum}(100);Sphingobacteriia{class}(100);Sphingobacteriales{order}(100);Chitinophagaceae{family}(100);Unassigned{genus}(0);Unassigned{species}(0)	Bacteria	Bacteroidetes	Sphingobacteriia	Sphingobacteriales	Chitinophagaceae	Unassigned	Unassigned
ASV439	0	0	0	0	38	0	0	67	103	166	30	127	588	490	1187	0	0	2796	Bacteria{superkingdom}(100);Bacteroidetes{phylum}(100);Sphingobacteriia{class}(100);Sphingobacteriales{order}(100);Chitinophagaceae{family}(100);Unassigned{genus}(0);Unassigned{species}(0)	Bacteria	Bacteroidetes	Sphingobacteriia	Sphingobacteriales	Chitinophagaceae	Unassigned	Unassigned
ASV440	62	0	13	73	165	270	42	14	51	31	32	73	178	104	28	32	12	1180	Bacteria{superkingdom}(94);Actinobacteria{phylum}(94);Actinobacteria{class}(94);Actinomycetales{order}(94);Micromonosporaceae{family}(94);Catelliglobosispora{genus}(94);Unassigned{species}(0)	Bacteria	Actinobacteria	Actinobacteria	Actinomycetales	Micromonosporaceae	Catelliglobosispora	Unassigned
ASV441	132	0	93	72	193	88	153	22	72	31	48	25	17	11	9	4	19	989	Bacteria{superkingdom}(95);Acidobacteria{phylum}(95);Acidobacteria_Gp6{class}(95);{order}(95);{family}(95);Gp6{genus}(95);agricultural_soil_bacterium_SC-I-9{species}(95)	Bacteria	Acidobacteria	Acidobacteria_Gp6			Gp6	agricultural_soil_bacterium_SC-I-9
ASV442	21	0	0	41	55	645	0	0	0	0	0	0	0	0	0	0	0	762	Bacteria{superkingdom}(100);Proteobacteria{phylum}(100);Gammaproteobacteria{class}(100);Xanthomonadales{order}(100);Xanthomonadaceae{family}(100);Pseudofulvimonas{genus}(100);Unassigned{species}(0)	Bacteria	Proteobacteria	Gammaproteobacteria	Xanthomonadales	Xanthomonadaceae	Pseudofulvimonas	Unassigned
ASV443	0	0	36	0	316	117	0	0	0	0	0	0	0	0	0	0	0	469	Bacteria{superkingdom}(100);Planctomycetes{phylum}(100);Planctomycetia{class}(100);Planctomycetales{order}(100);Planctomycetaceae{family}(100);Unassigned{genus}(0);Unassigned{species}(0)	Bacteria	Planctomycetes	Planctomycetia	Planctomycetales	Planctomycetaceae	Unassigned	Unassigned
ASV444	184	0	548	28	0	0	0	0	0	21	0	0	49	0	0	0	0	830	Bacteria{superkingdom}(94);Bacteroidetes{phylum}(94);Sphingobacteriia{class}(94);Sphingobacteriales{order}(94);Chitinophagaceae{family}(94);Taibaiella{genus}(94);uncultured_bacterium{species}(94)	Bacteria	Bacteroidetes	Sphingobacteriia	Sphingobacteriales	Chitinophagaceae	Taibaiella	uncultured_bacterium
ASV445	114	0	60	73	83	78	0	0	0	22	0	0	115	24	68	59	31	727	Bacteria{superkingdom}(97);Planctomycetes{phylum}(97);Planctomycetia{class}(97);Planctomycetales{order}(97);Planctomycetaceae{family}(97);Blastopirellula{genus}(97);uncultured_bacterium{species}(97)	Bacteria	Planctomycetes	Planctomycetia	Planctomycetales	Planctomycetaceae	Blastopirellula	uncultured_bacterium
ASV447	73	14	42	38	123	70	33	0	25	26	50	19	40	0	0	0	0	553	Bacteria{superkingdom}(95);Proteobacteria{phylum}(95);Alphaproteobacteria{class}(95);Rhizobiales{order}(95);{family}(95);{genus}(95);uncultured_Methylocystis_sp.{species}(95)	Bacteria	Proteobacteria	Alphaproteobacteria	Rhizobiales			uncultured_Methylocystis_sp.
ASV448	0	17	60	59	145	162	15	19	22	20	0	0	0	0	0	0	0	519	Bacteria{superkingdom}(85);Verrucomicrobia{phylum}(85);Opitutae{class}(85);Opitutales{order}(85);Opitutaceae{family}(85);Opitutus{genus}(85);uncultured_Opitutaceae_bacterium{species}(85)	Bacteria	Verrucomicrobia	Opitutae	Opitutales	Opitutaceae	Opitutus	uncultured_Opitutaceae_bacterium
ASV449	0	313	0	0	0	0	0	0	0	72	0	0	0	0	0	0	0	385	Bacteria{superkingdom}(100);Acidobacteria{phylum}(100);Acidobacteria_Gp4{class}(100);{order}(100);{family}(100);Gp4{genus}(100);Unassigned{species}(0)	Bacteria	Acidobacteria	Acidobacteria_Gp4			Gp4	Unassigned
ASV450	0	0	0	0	0	0	0	0	0	0	0	0	0	0	0	0	11	11	Bacteria{superkingdom}(95);Bacteroidetes{phylum}(95);Sphingobacteriia{class}(95);Sphingobacteriales{order}(95);Chitinophagaceae{family}(95);Segetibacter{genus}(95);uncultured_bacterium{species}(95)	Bacteria	Bacteroidetes	Sphingobacteriia	Sphingobacteriales	Chitinophagaceae	Segetibacter	uncultured_bacterium
ASV451	77	61	47	73	353	92	0	0	24	15	0	59	101	0	108	0	82	1092	Bacteria{superkingdom}(100);Proteobacteria{phylum}(100);Alphaproteobacteria{class}(100);Sphingomonadales{order}(100);Sphingomonadaceae{family}(100);Novosphingobium{genus}(100);Unassigned{species}(0)	Bacteria	Proteobacteria	Alphaproteobacteria	Sphingomonadales	Sphingomonadaceae	Novosphingobium	Unassigned
ASV452	87	254	32	0	69	19	97	43	59	71	32	113	25	28	45	82	31	1087	Bacteria{superkingdom}(100);Planctomycetes{phylum}(100);Planctomycetia{class}(100);Planctomycetales{order}(100);Planctomycetaceae{family}(100);Pirellula{genus}(100);Unassigned{species}(0)	Bacteria	Planctomycetes	Planctomycetia	Planctomycetales	Planctomycetaceae	Pirellula	Unassigned
ASV453	62	172	25	0	0	0	0	74	0	46	0	23	0	32	32	52	0	518	Bacteria{superkingdom}(100);Acidobacteria{phylum}(100);Acidobacteria_Gp6{class}(100);{order}(100);{family}(100);Gp6{genus}(100);Unassigned{species}(0)	Bacteria	Acidobacteria	Acidobacteria_Gp6			Gp6	Unassigned
ASV454	12	0	0	0	0	23	0	0	0	0	0	0	0	0	0	0	0	35	Bacteria{superkingdom}(100);Proteobacteria{phylum}(100);Gammaproteobacteria{class}(100);{order}(100);{family}(100);{genus}(100);Unassigned{species}(0)	Bacteria	Proteobacteria	Gammaproteobacteria				Unassigned
ASV455	0	0	0	94	0	0	233	242	89	231	210	47	451	158	62	22	194	2033	Bacteria{superkingdom}(100);Proteobacteria{phylum}(100);Deltaproteobacteria{class}(100);{order}(100);{family}(100);{genus}(100);uncultured_Syntrophobacterales_bacterium{species}(100)	Bacteria	Proteobacteria	Deltaproteobacteria				uncultured_Syntrophobacterales_bacterium
ASV456	0	0	8	0	0	0	83	82	98	153	85	192	74	454	421	21	45	1716	Bacteria{superkingdom}(100);Actinobacteria{phylum}(100);Actinobacteria{class}(100);Actinomycetales{order}(100);Nocardioidaceae{family}(100);Nocardioides{genus}(100);Unassigned{species}(0)	Bacteria	Actinobacteria	Actinobacteria	Actinomycetales	Nocardioidaceae	Nocardioides	Unassigned
ASV457	0	0	0	0	356	0	0	0	0	0	0	0	0	0	0	0	0	356	Bacteria{superkingdom}(100);Bacteroidetes{phylum}(100);Sphingobacteriia{class}(100);Sphingobacteriales{order}(100);Sphingobacteriaceae{family}(100);Sphingobacterium{genus}(100);Unassigned{species}(0)	Bacteria	Bacteroidetes	Sphingobacteriia	Sphingobacteriales	Sphingobacteriaceae	Sphingobacterium	Unassigned
ASV458	0	0	50	57	629	165	39	0	27	37	0	0	0	0	23	0	31	1058	Bacteria{superkingdom}(99);Proteobacteria{phylum}(99);Alphaproteobacteria{class}(99);Rhizobiales{order}(99);Rhizobiaceae{family}(99);Shinella{genus}(99);Unassigned{species}(0)	Bacteria	Proteobacteria	Alphaproteobacteria	Rhizobiales	Rhizobiaceae	Shinella	Unassigned
ASV459	97	0	98	110	738	340	0	0	0	0	0	1	3	0	1	1	11	1400	Bacteria{superkingdom}(100);Actinobacteria{phylum}(100);Actinobacteria{class}(100);Actinomycetales{order}(100);Microbacteriaceae{family}(100);Unassigned{genus}(0);Unassigned{species}(0)	Bacteria	Actinobacteria	Actinobacteria	Actinomycetales	Microbacteriaceae	Unassigned	Unassigned
ASV460	0	0	0	51	0	180	0	0	0	0	0	0	0	0	0	0	0	231	Bacteria{superkingdom}(100);Proteobacteria{phylum}(100);Alphaproteobacteria{class}(100);Rhizobiales{order}(100);Unassigned{family}(0);Unassigned{genus}(0);Unassigned{species}(0)	Bacteria	Proteobacteria	Alphaproteobacteria	Rhizobiales	Unassigned	Unassigned	Unassigned
ASV461	0	279	0	0	57	0	0	25	349	66	0	153	0	78	116	143	0	1266	Bacteria{superkingdom}(97);Acidobacteria{phylum}(97);Acidobacteria_Gp3{class}(97);{order}(97);{family}(97);Gp3{genus}(97);Unassigned{species}(0)	Bacteria	Acidobacteria	Acidobacteria_Gp3			Gp3	Unassigned
ASV462	50	142	0	27	91	15	0	56	15	52	0	31	32	28	0	61	10	610	Bacteria{superkingdom}(100);Proteobacteria{phylum}(100);Alphaproteobacteria{class}(100);Rhizobiales{order}(100);Hyphomicrobiaceae{family}(100);Unassigned{genus}(0);Unassigned{species}(0)	Bacteria	Proteobacteria	Alphaproteobacteria	Rhizobiales	Hyphomicrobiaceae	Unassigned	Unassigned
ASV463	162	287	176	0	0	183	381	167	115	0	0	80	119	0	0	0	0	1670	Bacteria{superkingdom}(93);Actinobacteria{phylum}(93);Actinobacteria{class}(93);Acidimicrobiales{order}(93);Acidimicrobineae_incertae_sedis{family}(93);Aciditerrimonas{genus}(93);uncultured_Acidimicrobiales_bacterium{species}(93)	Bacteria	Actinobacteria	Actinobacteria	Acidimicrobiales	Acidimicrobineae_incertae_sedis	Aciditerrimonas	uncultured_Acidimicrobiales_bacterium
ASV464	0	374	64	0	0	261	0	0	0	0	0	0	0	28	0	0	0	727	Bacteria{superkingdom}(86);Actinobacteria{phylum}(86);Actinobacteria{class}(86);Solirubrobacterales{order}(86);Conexibacteraceae{family}(86);Conexibacter{genus}(86);uncultured_Thermoleophilum_sp.{species}(86)	Bacteria	Actinobacteria	Actinobacteria	Solirubrobacterales	Conexibacteraceae	Conexibacter	uncultured_Thermoleophilum_sp.
ASV465	0	0	23	392	165	247	0	0	0	19	0	0	0	0	0	0	0	846	Bacteria{superkingdom}(84);Proteobacteria{phylum}(84);Oligoflexia{class}(84);Oligoflexales{order}(84);Oligoflexaceae{family}(84);Oligoflexus{genus}(84);uncultured_bacterium{species}(84)	Bacteria	Proteobacteria	Oligoflexia	Oligoflexales	Oligoflexaceae	Oligoflexus	uncultured_bacterium
ASV466	76	525	19	47	34	24	27	32	44	88	42	92	74	34	114	114	26	1412	Bacteria{superkingdom}(100);Acidobacteria{phylum}(100);Acidobacteria_Gp6{class}(100);{order}(100);{family}(100);Gp6{genus}(100);Unassigned{species}(0)	Bacteria	Acidobacteria	Acidobacteria_Gp6			Gp6	Unassigned
ASV467	61	41	27	67	292	23	23	17	22	20	0	103	36	46	31	37	32	878	Bacteria{superkingdom}(100);Proteobacteria{phylum}(100);Alphaproteobacteria{class}(100);Rhizobiales{order}(100);Hyphomicrobiaceae{family}(100);Devosia{genus}(100);Unassigned{species}(0)	Bacteria	Proteobacteria	Alphaproteobacteria	Rhizobiales	Hyphomicrobiaceae	Devosia	Unassigned
ASV468	51	63	52	106	173	161	0	17	31	23	44	42	59	25	0	143	13	1003	Bacteria{superkingdom}(100);Chloroflexi{phylum}(100);Caldilineae{class}(100);Caldilineales{order}(100);Caldilineaceae{family}(100);Litorilinea{genus}(100);Unassigned{species}(0)	Bacteria	Chloroflexi	Caldilineae	Caldilineales	Caldilineaceae	Litorilinea	Unassigned
ASV469	184	464	94	0	0	237	0	0	0	0	0	0	0	0	0	0	0	979	Bacteria{superkingdom}(91);Actinobacteria{phylum}(91);Actinobacteria{class}(91);Solirubrobacterales{order}(91);Conexibacteraceae{family}(91);Conexibacter{genus}(91);uncultured_Thermoleophilum_sp.{species}(91)	Bacteria	Actinobacteria	Actinobacteria	Solirubrobacterales	Conexibacteraceae	Conexibacter	uncultured_Thermoleophilum_sp.
ASV470	79	0	0	0	0	201	0	0	0	0	0	0	0	0	0	0	0	280	Bacteria{superkingdom}(100);Bacteroidetes{phylum}(100);Cytophagia{class}(100);Cytophagales{order}(100);{family}(100);Ohtaekwangia{genus}(100);Unassigned{species}(0)	Bacteria	Bacteroidetes	Cytophagia	Cytophagales		Ohtaekwangia	Unassigned
ASV471	0	0	0	0	0	0	0	3	0	0	0	0	0	530	0	23	0	556	Bacteria{superkingdom}(100);Actinobacteria{phylum}(100);Actinobacteria{class}(100);Actinomycetales{order}(100);Glycomycetaceae{family}(100);Glycomyces{genus}(100);Unassigned{species}(0)	Bacteria	Actinobacteria	Actinobacteria	Actinomycetales	Glycomycetaceae	Glycomyces	Unassigned
ASV472	87	0	42	114	123	57	177	223	94	71	116	0	69	0	0	0	23	1196	Bacteria{superkingdom}(100);Proteobacteria{phylum}(100);Betaproteobacteria{class}(100);{order}(100);{family}(100);{genus}(100);Unassigned{species}(0)	Bacteria	Proteobacteria	Betaproteobacteria				Unassigned
ASV473	100	0	48	90	76	60	49	22	24	13	14	26	51	54	25	26	31	709	Bacteria{superkingdom}(92);Proteobacteria{phylum}(92);Alphaproteobacteria{class}(92);Rhizobiales{order}(92);Phyllobacteriaceae{family}(92);Mesorhizobium{genus}(92);Unassigned{species}(0)	Bacteria	Proteobacteria	Alphaproteobacteria	Rhizobiales	Phyllobacteriaceae	Mesorhizobium	Unassigned
ASV474	115	209	85	88	105	33	57	0	51	62	45	31	0	37	0	40	0	958	Bacteria{superkingdom}(100);Actinobacteria{phylum}(100);Actinobacteria{class}(100);Solirubrobacterales{order}(100);Solirubrobacteraceae{family}(100);Solirubrobacter{genus}(100);Unassigned{species}(0)	Bacteria	Actinobacteria	Actinobacteria	Solirubrobacterales	Solirubrobacteraceae	Solirubrobacter	Unassigned
ASV475	0	58	0	0	0	0	0	0	0	0	0	0	0	0	0	0	0	58	Bacteria{superkingdom}(100);Proteobacteria{phylum}(100);Alphaproteobacteria{class}(100);Rhizobiales{order}(100);Phyllobacteriaceae{family}(100);Mesorhizobium{genus}(100);Unassigned{species}(0)	Bacteria	Proteobacteria	Alphaproteobacteria	Rhizobiales	Phyllobacteriaceae	Mesorhizobium	Unassigned
ASV476	0	46	0	0	0	0	0	0	0	0	0	0	0	0	0	0	0	46	Bacteria{superkingdom}(99);Bacteroidetes{phylum}(99);Sphingobacteriia{class}(99);Sphingobacteriales{order}(99);Chitinophagaceae{family}(99);Segetibacter{genus}(99);uncultured_bacterium{species}(99)	Bacteria	Bacteroidetes	Sphingobacteriia	Sphingobacteriales	Chitinophagaceae	Segetibacter	uncultured_bacterium
ASV478	50	0	0	0	235	0	0	0	0	0	0	0	0	9	0	0	0	294	Bacteria{superkingdom}(80);Bacteroidetes{phylum}(80);Cytophagia{class}(80);Cytophagales{order}(80);{family}(80);Ohtaekwangia{genus}(80);uncultured_Sphingobacteriales_bacterium{species}(80)	Bacteria	Bacteroidetes	Cytophagia	Cytophagales		Ohtaekwangia	uncultured_Sphingobacteriales_bacterium
ASV479	0	539	22	0	62	0	0	0	0	0	0	0	0	0	0	0	0	623	Bacteria{superkingdom}(93);Bacteroidetes{phylum}(93);Sphingobacteriia{class}(93);Sphingobacteriales{order}(93);Chitinophagaceae{family}(93);{genus}(93);Unassigned{species}(0)	Bacteria	Bacteroidetes	Sphingobacteriia	Sphingobacteriales	Chitinophagaceae		Unassigned
ASV480	75	0	39	41	329	196	0	0	0	0	0	0	21	0	0	0	0	701	Bacteria{superkingdom}(100);Proteobacteria{phylum}(100);Alphaproteobacteria{class}(100);Rhizobiales{order}(100);{family}(100);{genus}(100);Unassigned{species}(0)	Bacteria	Proteobacteria	Alphaproteobacteria	Rhizobiales			Unassigned
ASV481	66	0	82	102	0	56	0	0	0	30	58	0	52	0	0	0	50	496	Bacteria{superkingdom}(100);Actinobacteria{phylum}(100);Actinobacteria{class}(100);Actinomycetales{order}(100);Nocardioidaceae{family}(100);Nocardioides{genus}(100);Unassigned{species}(0)	Bacteria	Actinobacteria	Actinobacteria	Actinomycetales	Nocardioidaceae	Nocardioides	Unassigned
ASV482	0	0	0	0	0	0	0	0	0	51	0	0	0	0	0	0	0	51	Bacteria{superkingdom}(99);Actinobacteria{phylum}(99);Actinobacteria{class}(99);Actinomycetales{order}(99);Pseudonocardiaceae{family}(99);Kibdelosporangium{genus}(99);Unassigned{species}(0)	Bacteria	Actinobacteria	Actinobacteria	Actinomycetales	Pseudonocardiaceae	Kibdelosporangium	Unassigned
ASV483	0	0	5	0	0	0	5	0	0	13	0	21	0	0	0	24	0	68	Bacteria{superkingdom}(100);Proteobacteria{phylum}(100);Alphaproteobacteria{class}(100);Rhizobiales{order}(100);Rhizobiaceae{family}(100);Rhizobium{genus}(100);Unassigned{species}(0)	Bacteria	Proteobacteria	Alphaproteobacteria	Rhizobiales	Rhizobiaceae	Rhizobium	Unassigned
ASV484	97	0	114	59	170	140	88	44	63	92	222	115	209	0	0	17	52	1482	Bacteria{superkingdom}(97);Planctomycetes{phylum}(97);Planctomycetia{class}(97);Planctomycetales{order}(97);Planctomycetaceae{family}(97);Pirellula{genus}(97);uncultured_Firmicutes_bacterium{species}(97)	Bacteria	Planctomycetes	Planctomycetia	Planctomycetales	Planctomycetaceae	Pirellula	uncultured_Firmicutes_bacterium
ASV485	84	174	75	40	115	31	279	110	186	136	80	62	94	29	0	0	57	1552	Bacteria{superkingdom}(100);Proteobacteria{phylum}(100);Betaproteobacteria{class}(100);{order}(100);{family}(100);{genus}(100);Unassigned{species}(0)	Bacteria	Proteobacteria	Betaproteobacteria				Unassigned
ASV486	0	0	0	0	0	0	0	0	0	115	167	31	298	17	339	124	177	1268	Bacteria{superkingdom}(100);Bacteroidetes{phylum}(100);Cytophagia{class}(100);Cytophagales{order}(100);Cytophagaceae{family}(100);Adhaeribacter{genus}(100);Unassigned{species}(0)	Bacteria	Bacteroidetes	Cytophagia	Cytophagales	Cytophagaceae	Adhaeribacter	Unassigned
ASV487	132	11	71	117	115	92	0	22	35	6	23	31	23	109	7	106	55	955	Bacteria{superkingdom}(100);Chloroflexi{phylum}(100);Thermomicrobia{class}(100);Unassigned{order}(0);Unassigned{family}(0);Unassigned{genus}(0);Unassigned{species}(0)	Bacteria	Chloroflexi	Thermomicrobia	Unassigned	Unassigned	Unassigned	Unassigned
ASV488	0	0	0	0	12	0	0	0	0	0	0	0	0	0	0	0	0	12	Bacteria{superkingdom}(94);Cyanobacteria/Chloroplast{phylum}(94);Cyanobacteria{class}(94);{order}(94);Family_I{family}(94);GpI{genus}(94);uncultured_Scytonema_sp.{species}(94)	Bacteria	Cyanobacteria/Chloroplast	Cyanobacteria		Family_I	GpI	uncultured_Scytonema_sp.
ASV489	39	10	15	40	160	65	19	0	0	13	0	0	49	0	0	0	16	426	Bacteria{superkingdom}(82);Proteobacteria{phylum}(82);Gammaproteobacteria{class}(82);{order}(82);{family}(82);{genus}(82);uncultured_Steroidobacter_sp.{species}(82)	Bacteria	Proteobacteria	Gammaproteobacteria				uncultured_Steroidobacter_sp.
ASV490	0	0	0	83	0	0	0	0	59	44	0	0	136	0	0	0	0	322	Bacteria{superkingdom}(100);Proteobacteria{phylum}(100);Gammaproteobacteria{class}(100);Xanthomonadales{order}(100);Sinobacteraceae{family}(100);Steroidobacter{genus}(100);Unassigned{species}(0)	Bacteria	Proteobacteria	Gammaproteobacteria	Xanthomonadales	Sinobacteraceae	Steroidobacter	Unassigned
ASV491	0	0	0	0	0	0	0	0	0	0	355	0	0	0	0	0	0	355	Bacteria{superkingdom}(100);Acidobacteria{phylum}(100);Acidobacteria_Gp7{class}(100);{order}(100);{family}(100);Gp7{genus}(100);Unassigned{species}(0)	Bacteria	Acidobacteria	Acidobacteria_Gp7			Gp7	Unassigned
ASV492	0	0	0	18	0	42	0	0	0	0	0	4	0	0	0	0	0	64	Bacteria{superkingdom}(100);Bacteroidetes{phylum}(100);Sphingobacteriia{class}(100);Sphingobacteriales{order}(100);Chitinophagaceae{family}(100);Unassigned{genus}(0);Unassigned{species}(0)	Bacteria	Bacteroidetes	Sphingobacteriia	Sphingobacteriales	Chitinophagaceae	Unassigned	Unassigned
ASV493	0	161	0	15	0	0	0	0	0	0	0	0	0	65	8	0	0	249	Bacteria{superkingdom}(100);Acidobacteria{phylum}(100);Acidobacteria_Gp10{class}(100);{order}(100);{family}(100);Gp10{genus}(100);Unassigned{species}(0)	Bacteria	Acidobacteria	Acidobacteria_Gp10			Gp10	Unassigned
ASV494	0	0	0	28	0	0	0	0	0	0	0	0	0	0	30	62	0	120	Bacteria{superkingdom}(100);Actinobacteria{phylum}(100);Actinobacteria{class}(100);Actinomycetales{order}(100);Pseudonocardiaceae{family}(100);Lentzea{genus}(100);Unassigned{species}(0)	Bacteria	Actinobacteria	Actinobacteria	Actinomycetales	Pseudonocardiaceae	Lentzea	Unassigned
ASV495	44	138	11	24	0	27	14	0	35	63	82	90	292	403	23	71	63	1380	Bacteria{superkingdom}(100);Proteobacteria{phylum}(100);Betaproteobacteria{class}(100);Nitrosomonadales{order}(100);Nitrosomonadaceae{family}(100);Nitrosospira{genus}(100);Unassigned{species}(0)	Bacteria	Proteobacteria	Betaproteobacteria	Nitrosomonadales	Nitrosomonadaceae	Nitrosospira	Unassigned
ASV496	194	0	131	92	135	118	23	0	20	0	0	0	0	0	0	0	0	713	Bacteria{superkingdom}(100);Actinobacteria{phylum}(100);Actinobacteria{class}(100);Actinomycetales{order}(100);Nocardioidaceae{family}(100);Nocardioides{genus}(100);Unassigned{species}(0)	Bacteria	Actinobacteria	Actinobacteria	Actinomycetales	Nocardioidaceae	Nocardioides	Unassigned
ASV498	51	0	13	0	50	0	12	0	0	0	0	0	0	0	0	0	0	126	Bacteria{superkingdom}(84);candidate_division_WPS-1{phylum}(84);{class}(84);{order}(84);{family}(84);WPS-1_genera_incertae_sedis{genus}(84);uncultured_bacterium{species}(84)	Bacteria	candidate_division_WPS-1				WPS-1_genera_incertae_sedis	uncultured_bacterium
ASV499	51	61	55	39	55	149	164	0	0	0	64	28	0	51	68	62	223	1070	Bacteria{superkingdom}(87);Actinobacteria{phylum}(87);Actinobacteria{class}(87);Solirubrobacterales{order}(87);Solirubrobacteraceae{family}(87);Solirubrobacter{genus}(87);uncultured_bacterium{species}(87)	Bacteria	Actinobacteria	Actinobacteria	Solirubrobacterales	Solirubrobacteraceae	Solirubrobacter	uncultured_bacterium
ASV500	270	520	299	0	0	87	0	62	51	0	0	0	0	0	0	179	0	1468	Bacteria{superkingdom}(100);Chloroflexi{phylum}(100);{class}(100);{order}(100);{family}(100);{genus}(100);uncultured_Anaerolineae_bacterium{species}(100)	Bacteria	Chloroflexi					uncultured_Anaerolineae_bacterium
ASV501	0	0	7	76	8	0	0	0	0	0	98	0	3791	774	0	0	14	4768	Bacteria{superkingdom}(84);Acidobacteria{phylum}(84);Acidobacteria_Gp10{class}(84);{order}(84);{family}(84);Gp10{genus}(84);uncultured_Firmicutes_bacterium{species}(84)	Bacteria	Acidobacteria	Acidobacteria_Gp10			Gp10	uncultured_Firmicutes_bacterium
ASV502	43	621	0	98	57	57	6	4	41	34	0	37	204	179	29	159	50	1619	Bacteria{superkingdom}(99);Acidobacteria{phylum}(99);Acidobacteria_Gp4{class}(99);{order}(99);{family}(99);Aridibacter{genus}(99);Unassigned{species}(0)	Bacteria	Acidobacteria	Acidobacteria_Gp4			Aridibacter	Unassigned
ASV503	0	0	124	10	0	385	15	0	0	21	0	0	116	36	11	50	42	810	Bacteria{superkingdom}(91);Proteobacteria{phylum}(91);Deltaproteobacteria{class}(91);Myxococcales{order}(91);Polyangiaceae{family}(91);{genus}(91);Unassigned{species}(0)	Bacteria	Proteobacteria	Deltaproteobacteria	Myxococcales	Polyangiaceae		Unassigned
ASV504	61	0	32	504	351	180	0	0	0	0	18	0	29	0	8	0	0	1183	Bacteria{superkingdom}(85);Proteobacteria{phylum}(85);Gammaproteobacteria{class}(85);Xanthomonadales{order}(85);Sinobacteraceae{family}(85);Povalibacter{genus}(85);uncultured_bacterium{species}(85)	Bacteria	Proteobacteria	Gammaproteobacteria	Xanthomonadales	Sinobacteraceae	Povalibacter	uncultured_bacterium
ASV505	91	61	0	158	128	171	0	0	0	0	0	0	187	0	0	0	0	796	Bacteria{superkingdom}(100);Proteobacteria{phylum}(100);Betaproteobacteria{class}(100);Burkholderiales{order}(100);Oxalobacteraceae{family}(100);Unassigned{genus}(0);Unassigned{species}(0)	Bacteria	Proteobacteria	Betaproteobacteria	Burkholderiales	Oxalobacteraceae	Unassigned	Unassigned
ASV506	0	0	42	89	375	85	0	0	0	0	0	0	0	0	0	0	0	591	Bacteria{superkingdom}(97);Proteobacteria{phylum}(97);Alphaproteobacteria{class}(97);Rhizobiales{order}(97);Hyphomicrobiaceae{family}(97);Devosia{genus}(97);Unassigned{species}(0)	Bacteria	Proteobacteria	Alphaproteobacteria	Rhizobiales	Hyphomicrobiaceae	Devosia	Unassigned
ASV507	125	0	42	73	271	134	0	18	15	10	0	25	124	45	90	0	26	998	Bacteria{superkingdom}(100);Proteobacteria{phylum}(100);Alphaproteobacteria{class}(100);Rhizobiales{order}(100);Unassigned{family}(0);Unassigned{genus}(0);Unassigned{species}(0)	Bacteria	Proteobacteria	Alphaproteobacteria	Rhizobiales	Unassigned	Unassigned	Unassigned
ASV508	0	123	33	57	0	47	103	133	118	99	75	0	67	26	50	0	49	980	Bacteria{superkingdom}(98);Acidobacteria{phylum}(98);Acidobacteria_Gp6{class}(98);{order}(98);{family}(98);Gp6{genus}(98);Unassigned{species}(0)	Bacteria	Acidobacteria	Acidobacteria_Gp6			Gp6	Unassigned
ASV509	36	21	22	26	308	126	8	11	7	0	0	0	16	0	11	0	10	602	Bacteria{superkingdom}(100);Proteobacteria{phylum}(100);Alphaproteobacteria{class}(100);Rhizobiales{order}(100);Xanthobacteraceae{family}(100);Unassigned{genus}(0);Unassigned{species}(0)	Bacteria	Proteobacteria	Alphaproteobacteria	Rhizobiales	Xanthobacteraceae	Unassigned	Unassigned
ASV510	108	0	20	74	0	53	5	58	12	0	0	139	161	52	0	62	33	777	Bacteria{superkingdom}(99);Chloroflexi{phylum}(99);Thermomicrobia{class}(99);Sphaerobacterales{order}(99);Sphaerobacteraceae{family}(99);Unassigned{genus}(0);Unassigned{species}(0)	Bacteria	Chloroflexi	Thermomicrobia	Sphaerobacterales	Sphaerobacteraceae	Unassigned	Unassigned
ASV511	104	79	67	26	232	44	27	93	74	46	35	10	92	6	0	6	82	1023	Bacteria{superkingdom}(100);Chloroflexi{phylum}(100);Caldilineae{class}(100);Caldilineales{order}(100);Caldilineaceae{family}(100);Litorilinea{genus}(100);Unassigned{species}(0)	Bacteria	Chloroflexi	Caldilineae	Caldilineales	Caldilineaceae	Litorilinea	Unassigned
ASV512	112	394	61	37	118	179	43	0	37	40	0	26	0	0	0	0	0	1047	Bacteria{superkingdom}(100);Actinobacteria{phylum}(100);Unassigned{class}(0);Unassigned{order}(0);Unassigned{family}(0);Unassigned{genus}(0);Unassigned{species}(0)	Bacteria	Actinobacteria	Unassigned	Unassigned	Unassigned	Unassigned	Unassigned
ASV513	43	22	8	4	27	33	2	5	7	0	0	3	0	4	1	2	2	163	Bacteria{superkingdom}(96);Proteobacteria{phylum}(96);Alphaproteobacteria{class}(96);Rhizobiales{order}(96);Rhizobiales_incertae_sedis{family}(96);Vasilyevaea{genus}(96);uncultured_bacterium{species}(96)	Bacteria	Proteobacteria	Alphaproteobacteria	Rhizobiales	Rhizobiales_incertae_sedis	Vasilyevaea	uncultured_bacterium
ASV514	239	0	24	0	0	0	0	0	0	49	0	429	0	0	0	0	76	817	Bacteria{superkingdom}(84);Acidobacteria{phylum}(84);Acidobacteria_Gp7{class}(84);{order}(84);{family}(84);Gp7{genus}(84);uncultured_soil_bacterium{species}(84)	Bacteria	Acidobacteria	Acidobacteria_Gp7			Gp7	uncultured_soil_bacterium
ASV515	52	31	0	8	88	110	0	0	0	0	0	0	0	0	0	0	0	289	Bacteria{superkingdom}(100);Acidobacteria{phylum}(100);Acidobacteria_Gp3{class}(100);{order}(100);{family}(100);{genus}(100);Acidobacteria_bacterium_IGE-016{species}(100)	Bacteria	Acidobacteria	Acidobacteria_Gp3				Acidobacteria_bacterium_IGE-016
ASV516	90	32	60	90	93	174	108	0	62	170	0	34	19	0	51	80	38	1101	Bacteria{superkingdom}(99);Gemmatimonadetes{phylum}(99);Gemmatimonadetes{class}(99);Gemmatimonadales{order}(99);Gemmatimonadaceae{family}(99);Gemmatimonas{genus}(99);Unassigned{species}(0)	Bacteria	Gemmatimonadetes	Gemmatimonadetes	Gemmatimonadales	Gemmatimonadaceae	Gemmatimonas	Unassigned
ASV518	292	157	66	251	1181	328	33	14	0	17	0	0	86	0	7	0	33	2465	Bacteria{superkingdom}(90);Proteobacteria{phylum}(90);Gammaproteobacteria{class}(90);Xanthomonadales{order}(90);Sinobacteraceae{family}(90);Steroidobacter{genus}(90);uncultured_gamma_proteobacterium{species}(90)	Bacteria	Proteobacteria	Gammaproteobacteria	Xanthomonadales	Sinobacteraceae	Steroidobacter	uncultured_gamma_proteobacterium
ASV519	94	450	69	23	0	38	0	0	0	24	0	0	0	0	0	0	0	698	Bacteria{superkingdom}(89);Acidobacteria{phylum}(89);Acidobacteria_Gp4{class}(89);{order}(89);{family}(89);Gp4{genus}(89);uncultured_Rhodopseudomonas_sp.{species}(89)	Bacteria	Acidobacteria	Acidobacteria_Gp4			Gp4	uncultured_Rhodopseudomonas_sp.
ASV520	0	0	0	0	0	0	0	0	0	4737	0	0	0	0	0	0	0	4737	Bacteria{superkingdom}(99);Acidobacteria{phylum}(99);Acidobacteria_Gp4{class}(99);{order}(99);{family}(99);Gp4{genus}(99);Unassigned{species}(0)	Bacteria	Acidobacteria	Acidobacteria_Gp4			Gp4	Unassigned
ASV521	0	110	63	0	41	44	32	0	0	0	0	0	0	0	0	0	0	290	Bacteria{superkingdom}(100);Acidobacteria{phylum}(100);Acidobacteria_Gp6{class}(100);{order}(100);{family}(100);Gp6{genus}(100);Unassigned{species}(0)	Bacteria	Acidobacteria	Acidobacteria_Gp6			Gp6	Unassigned
ASV522	77	151	75	48	91	64	160	57	208	61	134	26	4	11	0	0	215	1382	Bacteria{superkingdom}(99);Actinobacteria{phylum}(99);Actinobacteria{class}(99);Unassigned{order}(0);Unassigned{family}(0);Unassigned{genus}(0);Unassigned{species}(0)	Bacteria	Actinobacteria	Actinobacteria	Unassigned	Unassigned	Unassigned	Unassigned
ASV523	224	63	99	15	96	211	48	11	0	4	0	16	0	13	0	42	14	856	Bacteria{superkingdom}(100);Planctomycetes{phylum}(100);Planctomycetia{class}(100);Planctomycetales{order}(100);Planctomycetaceae{family}(100);Pirellula{genus}(100);Unassigned{species}(0)	Bacteria	Planctomycetes	Planctomycetia	Planctomycetales	Planctomycetaceae	Pirellula	Unassigned
ASV524	159	47	0	73	81	143	74	0	0	0	0	0	0	21	0	0	0	598	Bacteria{superkingdom}(100);Bacteroidetes{phylum}(100);Sphingobacteriia{class}(100);Sphingobacteriales{order}(100);Chitinophagaceae{family}(100);Niastella{genus}(100);Unassigned{species}(0)	Bacteria	Bacteroidetes	Sphingobacteriia	Sphingobacteriales	Chitinophagaceae	Niastella	Unassigned
ASV525	98	0	11	24	956	189	0	0	16	0	0	0	26	0	0	0	0	1320	Bacteria{superkingdom}(100);Planctomycetes{phylum}(100);Planctomycetia{class}(100);Planctomycetales{order}(100);Planctomycetaceae{family}(100);Pirellula{genus}(100);Unassigned{species}(0)	Bacteria	Planctomycetes	Planctomycetia	Planctomycetales	Planctomycetaceae	Pirellula	Unassigned
ASV526	361	0	0	0	140	0	0	0	0	0	0	75	0	12	54	36	11	689	Bacteria{superkingdom}(100);Actinobacteria{phylum}(100);Actinobacteria{class}(100);Actinomycetales{order}(100);Microbacteriaceae{family}(100);Microbacterium{genus}(100);Unassigned{species}(0)	Bacteria	Actinobacteria	Actinobacteria	Actinomycetales	Microbacteriaceae	Microbacterium	Unassigned
ASV527	112	0	63	0	43	101	42	24	0	36	0	0	15	0	0	51	0	487	Bacteria{superkingdom}(100);Actinobacteria{phylum}(100);Unassigned{class}(0);Unassigned{order}(0);Unassigned{family}(0);Unassigned{genus}(0);Unassigned{species}(0)	Bacteria	Actinobacteria	Unassigned	Unassigned	Unassigned	Unassigned	Unassigned
ASV528	119	0	0	120	74	0	0	54	53	191	157	188	0	40	48	50	0	1094	Bacteria{superkingdom}(100);Actinobacteria{phylum}(100);Actinobacteria{class}(100);Actinomycetales{order}(100);Nocardioidaceae{family}(100);Nocardioides{genus}(100);Unassigned{species}(0)	Bacteria	Actinobacteria	Actinobacteria	Actinomycetales	Nocardioidaceae	Nocardioides	Unassigned
ASV529	281	0	21	83	18	158	0	0	6	25	0	48	0	83	0	26	0	749	Bacteria{superkingdom}(81);Chloroflexi{phylum}(81);Thermomicrobia{class}(81);Sphaerobacterales{order}(81);Sphaerobacteraceae{family}(81);Nitrolancea{genus}(81);uncultured_bacterium{species}(81)	Bacteria	Chloroflexi	Thermomicrobia	Sphaerobacterales	Sphaerobacteraceae	Nitrolancea	uncultured_bacterium
ASV530	0	0	0	6	0	0	0	0	0	0	0	0	0	0	0	0	0	6	Bacteria{superkingdom}(100);Proteobacteria{phylum}(100);Alphaproteobacteria{class}(100);Caulobacterales{order}(100);Caulobacteraceae{family}(100);Unassigned{genus}(0);Unassigned{species}(0)	Bacteria	Proteobacteria	Alphaproteobacteria	Caulobacterales	Caulobacteraceae	Unassigned	Unassigned
ASV531	129	0	180	153	160	161	25	22	20	123	0	34	56	52	50	0	20	1185	Bacteria{superkingdom}(100);Actinobacteria{phylum}(100);Actinobacteria{class}(100);Actinomycetales{order}(100);Nocardioidaceae{family}(100);Nocardioides{genus}(100);Unassigned{species}(0)	Bacteria	Actinobacteria	Actinobacteria	Actinomycetales	Nocardioidaceae	Nocardioides	Unassigned
ASV532	88	0	99	0	472	164	0	0	0	0	0	0	0	0	0	0	0	823	Bacteria{superkingdom}(100);Chloroflexi{phylum}(100);Thermomicrobia{class}(100);Sphaerobacterales{order}(100);Sphaerobacteraceae{family}(100);{genus}(100);Unassigned{species}(0)	Bacteria	Chloroflexi	Thermomicrobia	Sphaerobacterales	Sphaerobacteraceae		Unassigned
ASV533	0	0	5	21	0	0	0	0	0	0	0	15	0	0	0	0	0	41	Bacteria{superkingdom}(100);Proteobacteria{phylum}(100);Betaproteobacteria{class}(100);Burkholderiales{order}(100);Oxalobacteraceae{family}(100);Massilia{genus}(100);Unassigned{species}(0)	Bacteria	Proteobacteria	Betaproteobacteria	Burkholderiales	Oxalobacteraceae	Massilia	Unassigned
ASV534	0	0	26	27	41	0	28	72	30	134	120	127	175	48	293	67	52	1240	Bacteria{superkingdom}(100);Proteobacteria{phylum}(100);Betaproteobacteria{class}(100);Burkholderiales{order}(100);Comamonadaceae{family}(100);Unassigned{genus}(0);Unassigned{species}(0)	Bacteria	Proteobacteria	Betaproteobacteria	Burkholderiales	Comamonadaceae	Unassigned	Unassigned
ASV535	124	0	106	0	138	167	317	109	197	0	33	23	0	0	0	0	24	1238	Bacteria{superkingdom}(80);Chloroflexi{phylum}(80);{class}(80);{order}(80);{family}(80);{genus}(80);uncultured_soil_bacterium{species}(80)	Bacteria	Chloroflexi					uncultured_soil_bacterium
ASV537	171	0	56	0	0	0	230	11	13	29	0	9	0	0	0	0	0	519	Bacteria{superkingdom}(100);Proteobacteria{phylum}(100);Alphaproteobacteria{class}(100);{order}(100);{family}(100);{genus}(100);Unassigned{species}(0)	Bacteria	Proteobacteria	Alphaproteobacteria				Unassigned
ASV538	55	0	39	89	120	105	31	0	0	0	0	0	43	0	0	0	33	515	Bacteria{superkingdom}(100);Armatimonadetes{phylum}(100);Chthonomonadetes{class}(100);Chthonomonadales{order}(100);Chthonomonadaceae{family}(100);Chthonomonas/Armatimonadetes_gp3{genus}(100);Unassigned{species}(0)	Bacteria	Armatimonadetes	Chthonomonadetes	Chthonomonadales	Chthonomonadaceae	Chthonomonas/Armatimonadetes_gp3	Unassigned
ASV539	255	0	36	82	158	111	0	0	0	0	0	0	0	0	0	0	0	642	Bacteria{superkingdom}(92);Actinobacteria{phylum}(92);Actinobacteria{class}(92);Actinomycetales{order}(92);Pseudonocardiaceae{family}(92);Actinophytocola{genus}(92);uncultured_bacterium{species}(92)	Bacteria	Actinobacteria	Actinobacteria	Actinomycetales	Pseudonocardiaceae	Actinophytocola	uncultured_bacterium
ASV540	42	0	142	188	235	94	25	0	33	10	35	0	9	0	0	0	0	813	Bacteria{superkingdom}(95);Proteobacteria{phylum}(95);Alphaproteobacteria{class}(95);Sphingomonadales{order}(95);Sphingomonadaceae{family}(95);Sphingomonas{genus}(95);Sphingomonas_koreensis{species}(95)	Bacteria	Proteobacteria	Alphaproteobacteria	Sphingomonadales	Sphingomonadaceae	Sphingomonas	Sphingomonas_koreensis
ASV541	33	0	24	0	250	82	0	17	9	0	11	45	69	64	27	25	18	674	Bacteria{superkingdom}(96);Proteobacteria{phylum}(96);Alphaproteobacteria{class}(96);Rhizobiales{order}(96);Rhodobiaceae{family}(96);Rhodoligotrophos{genus}(96);uncultured_Rhizobiales_bacterium{species}(96)	Bacteria	Proteobacteria	Alphaproteobacteria	Rhizobiales	Rhodobiaceae	Rhodoligotrophos	uncultured_Rhizobiales_bacterium
ASV542	2	5	2	0	10	6	0	0	0	415	0	390	11	155	19	67	141	1223	Bacteria{superkingdom}(100);Actinobacteria{phylum}(100);Actinobacteria{class}(100);Actinomycetales{order}(100);Pseudonocardiaceae{family}(100);Unassigned{genus}(0);Unassigned{species}(0)	Bacteria	Actinobacteria	Actinobacteria	Actinomycetales	Pseudonocardiaceae	Unassigned	Unassigned
ASV543	0	0	0	28	0	0	0	0	0	0	0	0	0	0	0	0	0	28	Bacteria{superkingdom}(100);Bacteroidetes{phylum}(100);Sphingobacteriia{class}(100);Sphingobacteriales{order}(100);Chitinophagaceae{family}(100);Unassigned{genus}(0);Unassigned{species}(0)	Bacteria	Bacteroidetes	Sphingobacteriia	Sphingobacteriales	Chitinophagaceae	Unassigned	Unassigned
ASV544	0	0	25	0	178	20	0	0	8	0	0	11	0	0	0	0	0	242	Bacteria{superkingdom}(99);Chloroflexi{phylum}(99);Anaerolineae{class}(99);Anaerolineales{order}(99);Anaerolineaceae{family}(99);{genus}(99);Unassigned{species}(0)	Bacteria	Chloroflexi	Anaerolineae	Anaerolineales	Anaerolineaceae		Unassigned
ASV545	0	0	30	0	67	0	43	0	392	263	55	258	235	9	0	0	51	1403	Bacteria{superkingdom}(100);Proteobacteria{phylum}(100);Unassigned{class}(0);Unassigned{order}(0);Unassigned{family}(0);Unassigned{genus}(0);Unassigned{species}(0)	Bacteria	Proteobacteria	Unassigned	Unassigned	Unassigned	Unassigned	Unassigned
ASV548	91	0	19	0	0	23	60	700	85	202	56	30	64	0	27	0	20	1377	Bacteria{superkingdom}(100);Actinobacteria{phylum}(100);Unassigned{class}(0);Unassigned{order}(0);Unassigned{family}(0);Unassigned{genus}(0);Unassigned{species}(0)	Bacteria	Actinobacteria	Unassigned	Unassigned	Unassigned	Unassigned	Unassigned
ASV549	80	77	15	12	20	105	10	0	5	0	2	0	2	0	0	0	2	330	Bacteria{superkingdom}(99);Proteobacteria{phylum}(99);Deltaproteobacteria{class}(99);{order}(99);{family}(99);{genus}(99);uncultured_Acidobacteriales_bacterium{species}(99)	Bacteria	Proteobacteria	Deltaproteobacteria				uncultured_Acidobacteriales_bacterium
ASV550	0	178	0	0	34	0	18	95	282	168	0	118	12	14	185	309	66	1479	Bacteria{superkingdom}(90);Proteobacteria{phylum}(90);Alphaproteobacteria{class}(90);Alphaproteobacteria_incertae_sedis{order}(90);{family}(90);Geminicoccus{genus}(90);uncultured_bacterium{species}(90)	Bacteria	Proteobacteria	Alphaproteobacteria	Alphaproteobacteria_incertae_sedis		Geminicoccus	uncultured_bacterium
ASV552	0	0	24	0	138	0	0	62	169	152	12	207	0	0	0	0	0	764	Bacteria{superkingdom}(100);Proteobacteria{phylum}(100);Alphaproteobacteria{class}(100);Rhizobiales{order}(100);Xanthobacteraceae{family}(100);Pseudolabrys{genus}(100);Unassigned{species}(0)	Bacteria	Proteobacteria	Alphaproteobacteria	Rhizobiales	Xanthobacteraceae	Pseudolabrys	Unassigned
ASV553	37	65	0	0	140	31	0	0	0	0	0	0	0	0	0	0	0	273	Bacteria{superkingdom}(97);Bacteroidetes{phylum}(97);Cytophagia{class}(97);Cytophagales{order}(97);{family}(97);Chryseolinea{genus}(97);Unassigned{species}(0)	Bacteria	Bacteroidetes	Cytophagia	Cytophagales		Chryseolinea	Unassigned
ASV554	0	0	87	40	120	21	24	11	96	81	106	136	342	49	209	0	68	1390	Bacteria{superkingdom}(100);Bacteroidetes{phylum}(100);Cytophagia{class}(100);Cytophagales{order}(100);{family}(100);Ohtaekwangia{genus}(100);Unassigned{species}(0)	Bacteria	Bacteroidetes	Cytophagia	Cytophagales		Ohtaekwangia	Unassigned
ASV555	47	0	0	68	98	0	0	0	0	0	72	64	0	152	89	76	0	666	Bacteria{superkingdom}(100);Actinobacteria{phylum}(100);Actinobacteria{class}(100);Actinomycetales{order}(100);Nocardioidaceae{family}(100);Nocardioides{genus}(100);Unassigned{species}(0)	Bacteria	Actinobacteria	Actinobacteria	Actinomycetales	Nocardioidaceae	Nocardioides	Unassigned
ASV556	0	0	0	51	118	0	32	192	142	206	58	292	509	168	0	99	288	2155	Bacteria{superkingdom}(98);Chloroflexi{phylum}(98);Anaerolineae{class}(98);Anaerolineales{order}(98);Anaerolineaceae{family}(98);{genus}(98);uncultured_soil_bacterium{species}(98)	Bacteria	Chloroflexi	Anaerolineae	Anaerolineales	Anaerolineaceae		uncultured_soil_bacterium
ASV557	63	116	79	65	32	23	92	109	104	108	0	162	138	220	292	94	191	1888	Bacteria{superkingdom}(100);Proteobacteria{phylum}(100);Alphaproteobacteria{class}(100);Rhizobiales{order}(100);Methylobacteriaceae{family}(100);Microvirga{genus}(100);Unassigned{species}(0)	Bacteria	Proteobacteria	Alphaproteobacteria	Rhizobiales	Methylobacteriaceae	Microvirga	Unassigned
ASV558	87	285	69	44	165	28	75	24	85	46	15	60	8	102	0	129	5	1227	Bacteria{superkingdom}(100);Planctomycetes{phylum}(100);Planctomycetia{class}(100);Planctomycetales{order}(100);Planctomycetaceae{family}(100);Pirellula{genus}(100);Unassigned{species}(0)	Bacteria	Planctomycetes	Planctomycetia	Planctomycetales	Planctomycetaceae	Pirellula	Unassigned
ASV559	36	0	24	15	69	64	0	0	0	0	17	0	0	0	0	17	0	242	Bacteria{superkingdom}(97);Planctomycetes{phylum}(97);Planctomycetia{class}(97);Planctomycetales{order}(97);Planctomycetaceae{family}(97);{genus}(97);uncultured_Planctomyces_sp.{species}(97)	Bacteria	Planctomycetes	Planctomycetia	Planctomycetales	Planctomycetaceae		uncultured_Planctomyces_sp.
ASV560	341	0	57	0	50	0	0	135	0	0	0	0	0	0	0	0	28	611	Bacteria{superkingdom}(100);Acidobacteria{phylum}(100);Acidobacteria_Gp10{class}(100);{order}(100);{family}(100);Gp10{genus}(100);Unassigned{species}(0)	Bacteria	Acidobacteria	Acidobacteria_Gp10			Gp10	Unassigned
ASV562	28	0	20	13	148	190	0	0	0	15	0	0	0	0	0	0	0	414	Bacteria{superkingdom}(100);Chloroflexi{phylum}(100);Caldilineae{class}(100);Caldilineales{order}(100);Caldilineaceae{family}(100);Litorilinea{genus}(100);uncultured_Litorilinea_sp.{species}(100)	Bacteria	Chloroflexi	Caldilineae	Caldilineales	Caldilineaceae	Litorilinea	uncultured_Litorilinea_sp.
ASV563	0	90	108	15	34	0	21	0	0	21	20	59	0	62	90	99	0	619	Bacteria{superkingdom}(100);Proteobacteria{phylum}(100);Alphaproteobacteria{class}(100);Rhodobacterales{order}(100);Rhodobacteraceae{family}(100);Rubellimicrobium{genus}(100);Unassigned{species}(0)	Bacteria	Proteobacteria	Alphaproteobacteria	Rhodobacterales	Rhodobacteraceae	Rubellimicrobium	Unassigned
ASV564	0	0	0	63	0	101	0	0	29	0	36	0	0	0	0	6	0	235	Bacteria{superkingdom}(100);Acidobacteria{phylum}(100);Acidobacteria_Gp6{class}(100);{order}(100);{family}(100);Gp6{genus}(100);Unassigned{species}(0)	Bacteria	Acidobacteria	Acidobacteria_Gp6			Gp6	Unassigned
ASV565	0	0	0	0	50	0	0	0	0	0	0	0	0	0	42	0	0	92	Bacteria{superkingdom}(99);Proteobacteria{phylum}(99);Alphaproteobacteria{class}(99);Rhizobiales{order}(99);Rhizobiaceae{family}(99);Rhizobium{genus}(99);Unassigned{species}(0)	Bacteria	Proteobacteria	Alphaproteobacteria	Rhizobiales	Rhizobiaceae	Rhizobium	Unassigned
ASV566	154	84	0	31	209	470	0	0	0	0	0	0	27	0	0	0	0	975	Bacteria{superkingdom}(96);Proteobacteria{phylum}(96);Betaproteobacteria{class}(96);Burkholderiales{order}(96);Oxalobacteraceae{family}(96);Unassigned{genus}(0);Unassigned{species}(0)	Bacteria	Proteobacteria	Betaproteobacteria	Burkholderiales	Oxalobacteraceae	Unassigned	Unassigned
ASV567	132	0	79	0	0	80	0	0	53	0	0	0	0	0	0	0	20	364	Bacteria{superkingdom}(100);Actinobacteria{phylum}(100);Actinobacteria{class}(100);Acidimicrobiales{order}(100);Unassigned{family}(0);Unassigned{genus}(0);Unassigned{species}(0)	Bacteria	Actinobacteria	Actinobacteria	Acidimicrobiales	Unassigned	Unassigned	Unassigned
ASV568	63	7	57	101	321	43	0	0	36	0	12	42	24	20	0	0	31	757	Bacteria{superkingdom}(89);Proteobacteria{phylum}(89);Alphaproteobacteria{class}(89);Rhizobiales{order}(89);Hyphomicrobiaceae{family}(89);Devosia{genus}(89);Unassigned{species}(0)	Bacteria	Proteobacteria	Alphaproteobacteria	Rhizobiales	Hyphomicrobiaceae	Devosia	Unassigned
ASV569	66	0	31	104	50	70	51	19	120	111	292	24	56	40	18	18	16	1086	Bacteria{superkingdom}(96);{phylum}(96);{class}(96);{order}(96);{family}(96);{genus}(96);Unassigned{species}(0)	Bacteria						Unassigned
ASV570	72	0	0	110	0	65	76	78	49	126	127	103	1376	44	0	0	62	2288	Bacteria{superkingdom}(100);Bacteroidetes{phylum}(100);Cytophagia{class}(100);Cytophagales{order}(100);{family}(100);Ohtaekwangia{genus}(100);Unassigned{species}(0)	Bacteria	Bacteroidetes	Cytophagia	Cytophagales		Ohtaekwangia	Unassigned
ASV571	51	116	38	26	79	57	46	7	44	39	36	0	17	13	63	24	0	656	Bacteria{superkingdom}(92);Chloroflexi{phylum}(92);Dehalococcoidia{class}(92);Dehalococcoidales{order}(92);Dehalococcoidaceae{family}(92);Dehalococcoides{genus}(92);uncultured_soil_bacterium{species}(92)	Bacteria	Chloroflexi	Dehalococcoidia	Dehalococcoidales	Dehalococcoidaceae	Dehalococcoides	uncultured_soil_bacterium
ASV572	50	0	39	11	607	92	0	0	0	0	0	0	0	0	0	0	0	799	Bacteria{superkingdom}(98);Bacteroidetes{phylum}(98);Sphingobacteriia{class}(98);Sphingobacteriales{order}(98);Chitinophagaceae{family}(98);Terrimonas{genus}(98);Unassigned{species}(0)	Bacteria	Bacteroidetes	Sphingobacteriia	Sphingobacteriales	Chitinophagaceae	Terrimonas	Unassigned
ASV573	97	182	19	0	0	0	0	0	0	0	0	0	0	0	0	0	0	298	Bacteria{superkingdom}(100);Acidobacteria{phylum}(100);Acidobacteria_Gp6{class}(100);{order}(100);{family}(100);Gp6{genus}(100);Unassigned{species}(0)	Bacteria	Acidobacteria	Acidobacteria_Gp6			Gp6	Unassigned
ASV574	174	8	51	132	380	220	35	0	0	32	0	0	24	11	0	0	11	1078	Bacteria{superkingdom}(100);Proteobacteria{phylum}(100);Alphaproteobacteria{class}(100);Caulobacterales{order}(100);Caulobacteraceae{family}(100);Phenylobacterium{genus}(100);Unassigned{species}(0)	Bacteria	Proteobacteria	Alphaproteobacteria	Caulobacterales	Caulobacteraceae	Phenylobacterium	Unassigned
ASV575	286	0	192	13	224	85	7	0	0	8	0	0	17	0	0	6	0	838	Bacteria{superkingdom}(82);{phylum}(82);{class}(82);{order}(82);{family}(82);{genus}(82);uncultured_Gemmatimonadetes_bacterium{species}(82)	Bacteria						uncultured_Gemmatimonadetes_bacterium
ASV576	50	0	0	37	0	108	0	0	0	0	0	0	0	0	0	0	0	195	Bacteria{superkingdom}(86);Planctomycetes{phylum}(86);Planctomycetia{class}(86);Planctomycetales{order}(86);Planctomycetaceae{family}(86);{genus}(86);Unassigned{species}(0)	Bacteria	Planctomycetes	Planctomycetia	Planctomycetales	Planctomycetaceae		Unassigned
ASV577	25	0	11	0	64	97	0	25	0	0	0	0	7	0	0	0	0	229	Bacteria{superkingdom}(100);Ignavibacteriae{phylum}(100);Ignavibacteria{class}(100);Ignavibacteriales{order}(100);Ignavibacteriaceae{family}(100);Unassigned{genus}(0);Unassigned{species}(0)	Bacteria	Ignavibacteriae	Ignavibacteria	Ignavibacteriales	Ignavibacteriaceae	Unassigned	Unassigned
ASV578	0	63	0	0	0	44	0	0	0	60	0	0	0	0	0	0	0	167	Bacteria{superkingdom}(100);Acidobacteria{phylum}(100);Acidobacteria_Gp4{class}(100);{order}(100);{family}(100);Gp4{genus}(100);uncultured_Candidatus_Chloracidobacterium_sp.{species}(100)	Bacteria	Acidobacteria	Acidobacteria_Gp4			Gp4	uncultured_Candidatus_Chloracidobacterium_sp.
ASV579	0	0	0	66	79	87	44	49	48	123	33	80	68	79	135	26	48	965	Bacteria{superkingdom}(100);Proteobacteria{phylum}(100);Alphaproteobacteria{class}(100);Rhizobiales{order}(100);Unassigned{family}(0);Unassigned{genus}(0);Unassigned{species}(0)	Bacteria	Proteobacteria	Alphaproteobacteria	Rhizobiales	Unassigned	Unassigned	Unassigned
ASV580	32	0	11	0	0	71	0	0	8	0	0	0	25	0	0	28	0	175	Bacteria{superkingdom}(100);Unassigned{phylum}(0);Unassigned{class}(0);Unassigned{order}(0);Unassigned{family}(0);Unassigned{genus}(0);Unassigned{species}(0)	Bacteria	Unassigned	Unassigned	Unassigned	Unassigned	Unassigned	Unassigned
ASV581	79	61	71	106	98	75	17	31	29	85	41	54	49	101	13	18	10	938	Bacteria{superkingdom}(94);candidate_division_WPS-1{phylum}(94);{class}(94);{order}(94);{family}(94);WPS-1_genera_incertae_sedis{genus}(94);uncultured_bacterium{species}(94)	Bacteria	candidate_division_WPS-1				WPS-1_genera_incertae_sedis	uncultured_bacterium
ASV582	95	185	0	0	0	130	77	251	218	122	0	73	0	0	0	36	0	1187	Bacteria{superkingdom}(100);Acidobacteria{phylum}(100);Acidobacteria_Gp6{class}(100);{order}(100);{family}(100);Gp6{genus}(100);Unassigned{species}(0)	Bacteria	Acidobacteria	Acidobacteria_Gp6			Gp6	Unassigned
ASV583	169	60	151	132	178	123	7	16	0	45	0	0	24	11	0	0	0	916	Bacteria{superkingdom}(85);Actinobacteria{phylum}(85);Actinobacteria{class}(85);Rubrobacterales{order}(85);Rubrobacteraceae{family}(85);Rubrobacter{genus}(85);uncultured_bacterium{species}(85)	Bacteria	Actinobacteria	Actinobacteria	Rubrobacterales	Rubrobacteraceae	Rubrobacter	uncultured_bacterium
ASV584	138	74	57	0	1166	0	9	0	6	0	0	0	0	0	0	0	29	1479	Bacteria{superkingdom}(90);Bacteroidetes{phylum}(90);Cytophagia{class}(90);Cytophagales{order}(90);{family}(90);Ohtaekwangia{genus}(90);Bacteroidetes_bacterium_GS{species}(90)	Bacteria	Bacteroidetes	Cytophagia	Cytophagales		Ohtaekwangia	Bacteroidetes_bacterium_GS
ASV585	0	0	7	27	86	0	70	23	26	556	205	37	130	32	461	14	0	1674	Bacteria{superkingdom}(100);Bacteroidetes{phylum}(100);Sphingobacteriia{class}(100);Sphingobacteriales{order}(100);Chitinophagaceae{family}(100);Unassigned{genus}(0);Unassigned{species}(0)	Bacteria	Bacteroidetes	Sphingobacteriia	Sphingobacteriales	Chitinophagaceae	Unassigned	Unassigned
ASV586	131	0	0	167	271	0	0	0	0	0	0	47	18	42	42	36	12	766	Bacteria{superkingdom}(100);Armatimonadetes{phylum}(100);{class}(100);{order}(100);{family}(100);Armatimonadetes_gp4{genus}(100);uncultured_candidate_division_OP10_bacterium{species}(100)	Bacteria	Armatimonadetes				Armatimonadetes_gp4	uncultured_candidate_division_OP10_bacterium
ASV587	0	41	11	7	38	29	7	0	0	0	0	0	0	0	0	0	0	133	Bacteria{superkingdom}(100);Acidobacteria{phylum}(100);Acidobacteria_Gp6{class}(100);{order}(100);{family}(100);Gp6{genus}(100);Unassigned{species}(0)	Bacteria	Acidobacteria	Acidobacteria_Gp6			Gp6	Unassigned
ASV588	0	0	0	0	0	0	17	106	0	0	0	302	0	0	0	0	0	425	Bacteria{superkingdom}(80);Bacteroidetes{phylum}(80);Sphingobacteriia{class}(80);Sphingobacteriales{order}(80);Chitinophagaceae{family}(80);Flavitalea{genus}(80);uncultured_Niastella_sp.{species}(80)	Bacteria	Bacteroidetes	Sphingobacteriia	Sphingobacteriales	Chitinophagaceae	Flavitalea	uncultured_Niastella_sp.
ASV589	93	0	133	72	206	49	149	0	62	357	203	113	63	0	0	0	75	1575	Bacteria{superkingdom}(99);Proteobacteria{phylum}(99);Betaproteobacteria{class}(99);Burkholderiales{order}(99);Comamonadaceae{family}(99);Unassigned{genus}(0);Unassigned{species}(0)	Bacteria	Proteobacteria	Betaproteobacteria	Burkholderiales	Comamonadaceae	Unassigned	Unassigned
ASV592	31	24	0	0	48	0	0	0	12	27	0	37	0	69	0	86	0	334	Bacteria{superkingdom}(97);Proteobacteria{phylum}(97);Alphaproteobacteria{class}(97);Rhizobiales{order}(97);Xanthobacteraceae{family}(97);Pseudolabrys{genus}(97);Unassigned{species}(0)	Bacteria	Proteobacteria	Alphaproteobacteria	Rhizobiales	Xanthobacteraceae	Pseudolabrys	Unassigned
ASV593	145	41	48	0	0	0	0	0	32	18	0	0	0	0	0	0	0	284	Bacteria{superkingdom}(91);Proteobacteria{phylum}(91);Betaproteobacteria{class}(91);{order}(91);{family}(91);{genus}(91);uncultured_Alcaligenaceae_bacterium{species}(91)	Bacteria	Proteobacteria	Betaproteobacteria				uncultured_Alcaligenaceae_bacterium
ASV595	81	0	38	125	0	0	0	0	0	0	0	0	0	0	0	0	8	252	Bacteria{superkingdom}(84);Bacteroidetes{phylum}(84);Sphingobacteriia{class}(84);Sphingobacteriales{order}(84);Chitinophagaceae{family}(84);Niastella{genus}(84);uncultured_bacterium{species}(84)	Bacteria	Bacteroidetes	Sphingobacteriia	Sphingobacteriales	Chitinophagaceae	Niastella	uncultured_bacterium
ASV596	37	0	53	79	41	0	0	0	18	19	0	0	0	18	0	0	0	265	Bacteria{superkingdom}(100);Firmicutes{phylum}(100);Bacilli{class}(100);Bacillales{order}(100);Paenibacillaceae_1{family}(100);Paenibacillus{genus}(100);Unassigned{species}(0)	Bacteria	Firmicutes	Bacilli	Bacillales	Paenibacillaceae_1	Paenibacillus	Unassigned
ASV597	0	0	0	0	29	0	55	41	0	32	83	106	124	669	839	42	0	2020	Bacteria{superkingdom}(90);Actinobacteria{phylum}(90);Actinobacteria{class}(90);Acidimicrobiales{order}(90);Acidimicrobineae_incertae_sedis{family}(90);Aciditerrimonas{genus}(90);Unassigned{species}(0)	Bacteria	Actinobacteria	Actinobacteria	Acidimicrobiales	Acidimicrobineae_incertae_sedis	Aciditerrimonas	Unassigned
ASV598	79	56	26	50	118	20	34	56	64	99	56	18	74	78	29	47	56	960	Bacteria{superkingdom}(98);Chloroflexi{phylum}(98);{class}(98);{order}(98);{family}(98);{genus}(98);uncultured_Firmicutes_bacterium{species}(98)	Bacteria	Chloroflexi					uncultured_Firmicutes_bacterium
ASV599	31	125	30	0	123	23	35	52	130	108	38	88	66	71	142	83	76	1221	Bacteria{superkingdom}(100);Proteobacteria{phylum}(100);Alphaproteobacteria{class}(100);Caulobacterales{order}(100);Caulobacteraceae{family}(100);{genus}(100);Unassigned{species}(0)	Bacteria	Proteobacteria	Alphaproteobacteria	Caulobacterales	Caulobacteraceae		Unassigned
ASV600	0	0	0	90	0	0	43	48	34	30	50	36	51	233	368	63	100	1146	Bacteria{superkingdom}(100);Actinobacteria{phylum}(100);Actinobacteria{class}(100);Acidimicrobiales{order}(100);Unassigned{family}(0);Unassigned{genus}(0);Unassigned{species}(0)	Bacteria	Actinobacteria	Actinobacteria	Acidimicrobiales	Unassigned	Unassigned	Unassigned
ASV602	48	26	0	60	105	0	0	0	0	0	39	44	47	44	37	72	53	575	Bacteria{superkingdom}(100);Acidobacteria{phylum}(100);Acidobacteria_Gp6{class}(100);{order}(100);{family}(100);Gp6{genus}(100);Unassigned{species}(0)	Bacteria	Acidobacteria	Acidobacteria_Gp6			Gp6	Unassigned
ASV603	203	68	38	0	133	61	56	60	118	26	0	29	0	0	0	0	0	792	Bacteria{superkingdom}(93);Planctomycetes{phylum}(93);Planctomycetia{class}(93);Planctomycetales{order}(93);Planctomycetaceae{family}(93);Pirellula{genus}(93);uncultured_Planctomycetacia_bacterium{species}(93)	Bacteria	Planctomycetes	Planctomycetia	Planctomycetales	Planctomycetaceae	Pirellula	uncultured_Planctomycetacia_bacterium
ASV604	68	303	48	28	83	38	230	174	125	79	55	0	22	0	0	0	26	1279	Bacteria{superkingdom}(100);Proteobacteria{phylum}(100);Betaproteobacteria{class}(100);{order}(100);{family}(100);{genus}(100);Unassigned{species}(0)	Bacteria	Proteobacteria	Betaproteobacteria				Unassigned
ASV605	37	83	9	8	79	12	48	40	107	166	14	119	0	0	0	93	25	840	Bacteria{superkingdom}(98);Chloroflexi{phylum}(98);Chloroflexia{class}(98);{order}(98);{family}(98);{genus}(98);uncultured_soil_bacterium{species}(98)	Bacteria	Chloroflexi	Chloroflexia				uncultured_soil_bacterium
ASV606	129	0	43	54	88	85	35	0	209	22	0	95	14	0	16	172	45	1007	Bacteria{superkingdom}(92);Actinobacteria{phylum}(92);Actinobacteria{class}(92);Acidimicrobiales{order}(92);Acidimicrobineae_incertae_sedis{family}(92);Aciditerrimonas{genus}(92);uncultured_bacterium{species}(92)	Bacteria	Actinobacteria	Actinobacteria	Acidimicrobiales	Acidimicrobineae_incertae_sedis	Aciditerrimonas	uncultured_bacterium
ASV607	37	0	59	10	0	0	13	10	10	0	12	16	0	0	0	0	22	189	Bacteria{superkingdom}(99);Proteobacteria{phylum}(99);Alphaproteobacteria{class}(99);Rhizobiales{order}(99);Rhizobiaceae{family}(99);Rhizobium{genus}(99);Unassigned{species}(0)	Bacteria	Proteobacteria	Alphaproteobacteria	Rhizobiales	Rhizobiaceae	Rhizobium	Unassigned
ASV608	0	39	0	0	0	0	0	0	0	33	0	0	0	0	0	0	0	72	Bacteria{superkingdom}(97);Bacteroidetes{phylum}(97);Sphingobacteriia{class}(97);Sphingobacteriales{order}(97);Chitinophagaceae{family}(97);Segetibacter{genus}(97);uncultured_bacterium{species}(97)	Bacteria	Bacteroidetes	Sphingobacteriia	Sphingobacteriales	Chitinophagaceae	Segetibacter	uncultured_bacterium
ASV610	40	31	47	15	353	343	0	0	7	14	0	0	29	4	0	14	0	897	Bacteria{superkingdom}(100);Armatimonadetes{phylum}(100);{class}(100);{order}(100);{family}(100);Armatimonadetes_gp4{genus}(100);uncultured_bacterium{species}(100)	Bacteria	Armatimonadetes				Armatimonadetes_gp4	uncultured_bacterium
ASV611	155	31	86	123	168	164	8	13	6	8	0	0	7	4	9	18	16	816	Bacteria{superkingdom}(100);Proteobacteria{phylum}(100);Alphaproteobacteria{class}(100);Caulobacterales{order}(100);Caulobacteraceae{family}(100);Unassigned{genus}(0);Unassigned{species}(0)	Bacteria	Proteobacteria	Alphaproteobacteria	Caulobacterales	Caulobacteraceae	Unassigned	Unassigned
ASV612	111	0	30	53	158	339	0	0	0	0	0	0	0	0	0	0	23	714	Bacteria{superkingdom}(100);Acidobacteria{phylum}(100);Acidobacteria_Gp6{class}(100);{order}(100);{family}(100);Gp6{genus}(100);Unassigned{species}(0)	Bacteria	Acidobacteria	Acidobacteria_Gp6			Gp6	Unassigned
ASV613	61	61	48	35	150	120	0	0	0	0	0	0	0	0	0	0	0	475	Bacteria{superkingdom}(96);{phylum}(96);{class}(96);{order}(96);{family}(96);{genus}(96);uncultured_Anaerolineae_bacterium{species}(96)	Bacteria						uncultured_Anaerolineae_bacterium
ASV614	93	0	35	83	55	74	0	0	0	51	42	10	24	19	0	137	0	623	Bacteria{superkingdom}(91);Planctomycetes{phylum}(91);Planctomycetia{class}(91);Planctomycetales{order}(91);Planctomycetaceae{family}(91);Singulisphaera{genus}(91);uncultured_Planctomycetacia_bacterium{species}(91)	Bacteria	Planctomycetes	Planctomycetia	Planctomycetales	Planctomycetaceae	Singulisphaera	uncultured_Planctomycetacia_bacterium
ASV615	70	125	62	0	71	74	98	94	128	51	50	47	59	18	69	24	35	1075	Bacteria{superkingdom}(91);Proteobacteria{phylum}(91);Alphaproteobacteria{class}(91);Rhizobiales{order}(91);Hyphomicrobiaceae{family}(91);Rhodoplanes{genus}(91);Unassigned{species}(0)	Bacteria	Proteobacteria	Alphaproteobacteria	Rhizobiales	Hyphomicrobiaceae	Rhodoplanes	Unassigned
ASV616	0	56	0	0	0	0	0	0	0	0	0	22	0	99	62	92	0	331	Bacteria{superkingdom}(100);Chloroflexi{phylum}(100);Thermomicrobia{class}(100);Unassigned{order}(0);Unassigned{family}(0);Unassigned{genus}(0);Unassigned{species}(0)	Bacteria	Chloroflexi	Thermomicrobia	Unassigned	Unassigned	Unassigned	Unassigned
ASV617	0	0	0	0	1011	0	0	0	0	0	0	0	0	0	0	0	0	1011	Bacteria{superkingdom}(100);Acidobacteria{phylum}(100);Acidobacteria_Gp7{class}(100);{order}(100);{family}(100);Gp7{genus}(100);Unassigned{species}(0)	Bacteria	Acidobacteria	Acidobacteria_Gp7			Gp7	Unassigned
ASV618	0	142	0	0	0	42	34	113	19	48	83	60	70	78	79	40	50	858	Bacteria{superkingdom}(94);Verrucomicrobia{phylum}(94);Opitutae{class}(94);Opitutales{order}(94);Opitutaceae{family}(94);Opitutus{genus}(94);uncultured_Opitutaceae_bacterium{species}(94)	Bacteria	Verrucomicrobia	Opitutae	Opitutales	Opitutaceae	Opitutus	uncultured_Opitutaceae_bacterium
ASV619	76	0	72	62	103	64	28	8	52	76	33	20	10	103	0	118	21	846	Bacteria{superkingdom}(100);Proteobacteria{phylum}(100);Alphaproteobacteria{class}(100);Caulobacterales{order}(100);Caulobacteraceae{family}(100);Unassigned{genus}(0);Unassigned{species}(0)	Bacteria	Proteobacteria	Alphaproteobacteria	Caulobacterales	Caulobacteraceae	Unassigned	Unassigned
ASV620	84	214	82	58	128	98	74	95	88	145	38	47	0	11	28	32	21	1243	Bacteria{superkingdom}(100);Actinobacteria{phylum}(100);Actinobacteria{class}(100);Gaiellales{order}(100);Gaiellaceae{family}(100);Gaiella{genus}(100);Unassigned{species}(0)	Bacteria	Actinobacteria	Actinobacteria	Gaiellales	Gaiellaceae	Gaiella	Unassigned
ASV621	36	0	0	0	383	196	22	9	9	32	80	9	334	0	0	0	0	1110	Bacteria{superkingdom}(80);Firmicutes{phylum}(80);Bacilli{class}(80);Bacillales{order}(80);Planococcaceae{family}(80);Lysinibacillus{genus}(80);Unassigned{species}(0)	Bacteria	Firmicutes	Bacilli	Bacillales	Planococcaceae	Lysinibacillus	Unassigned
ASV622	75	0	0	0	0	44	0	0	0	0	0	0	0	0	0	0	0	119	Bacteria{superkingdom}(97);Planctomycetes{phylum}(97);Planctomycetia{class}(97);Planctomycetales{order}(97);Planctomycetaceae{family}(97);Blastopirellula{genus}(97);uncultured_bacterium{species}(97)	Bacteria	Planctomycetes	Planctomycetia	Planctomycetales	Planctomycetaceae	Blastopirellula	uncultured_bacterium
ASV623	87	0	0	0	0	0	0	0	0	0	0	43	0	133	39	148	0	450	Bacteria{superkingdom}(100);Actinobacteria{phylum}(100);Actinobacteria{class}(100);Actinomycetales{order}(100);Pseudonocardiaceae{family}(100);Lentzea{genus}(100);Unassigned{species}(0)	Bacteria	Actinobacteria	Actinobacteria	Actinomycetales	Pseudonocardiaceae	Lentzea	Unassigned
ASV624	73	0	0	65	261	0	25	88	144	156	56	66	124	89	74	14	99	1334	Bacteria{superkingdom}(100);Bacteroidetes{phylum}(100);Sphingobacteriia{class}(100);Sphingobacteriales{order}(100);Chitinophagaceae{family}(100);Flavitalea{genus}(100);Unassigned{species}(0)	Bacteria	Bacteroidetes	Sphingobacteriia	Sphingobacteriales	Chitinophagaceae	Flavitalea	Unassigned
ASV625	0	0	0	0	0	0	0	5	0	0	0	0	0	0	0	0	0	5	Bacteria{superkingdom}(100);Proteobacteria{phylum}(100);Alphaproteobacteria{class}(100);Rhizobiales{order}(100);Hyphomicrobiaceae{family}(100);Devosia{genus}(100);Unassigned{species}(0)	Bacteria	Proteobacteria	Alphaproteobacteria	Rhizobiales	Hyphomicrobiaceae	Devosia	Unassigned
ASV626	23	0	61	37	29	23	128	482	123	13	150	51	134	21	0	0	40	1315	Bacteria{superkingdom}(100);Planctomycetes{phylum}(100);Planctomycetia{class}(100);Planctomycetales{order}(100);Planctomycetaceae{family}(100);Unassigned{genus}(0);Unassigned{species}(0)	Bacteria	Planctomycetes	Planctomycetia	Planctomycetales	Planctomycetaceae	Unassigned	Unassigned
ASV627	151	0	0	56	0	0	0	0	0	45	188	0	0	18	93	83	0	634	Bacteria{superkingdom}(100);Acidobacteria{phylum}(100);Acidobacteria_Gp7{class}(100);{order}(100);{family}(100);Gp7{genus}(100);Unassigned{species}(0)	Bacteria	Acidobacteria	Acidobacteria_Gp7			Gp7	Unassigned
ASV628	0	60	45	59	0	0	144	71	76	135	188	49	0	0	0	0	74	901	Bacteria{superkingdom}(100);Acidobacteria{phylum}(100);Acidobacteria_Gp6{class}(100);{order}(100);{family}(100);Gp6{genus}(100);Unassigned{species}(0)	Bacteria	Acidobacteria	Acidobacteria_Gp6			Gp6	Unassigned
ASV629	50	1104	45	0	52	0	0	0	9	0	0	5	0	0	0	0	0	1265	Bacteria{superkingdom}(100);Verrucomicrobia{phylum}(100);Opitutae{class}(100);Opitutales{order}(100);Opitutaceae{family}(100);Opitutus{genus}(100);Unassigned{species}(0)	Bacteria	Verrucomicrobia	Opitutae	Opitutales	Opitutaceae	Opitutus	Unassigned
ASV631	77	0	40	0	0	38	313	0	281	13	0	254	112	11	113	255	242	1749	Bacteria{superkingdom}(100);Actinobacteria{phylum}(100);Actinobacteria{class}(100);Solirubrobacterales{order}(100);Unassigned{family}(0);Unassigned{genus}(0);Unassigned{species}(0)	Bacteria	Actinobacteria	Actinobacteria	Solirubrobacterales	Unassigned	Unassigned	Unassigned
ASV632	37	127	75	66	55	87	0	45	0	13	50	17	116	99	116	37	159	1099	Bacteria{superkingdom}(100);Acidobacteria{phylum}(100);Acidobacteria_Gp16{class}(100);{order}(100);{family}(100);Gp16{genus}(100);Unassigned{species}(0)	Bacteria	Acidobacteria	Acidobacteria_Gp16			Gp16	Unassigned
ASV633	131	0	96	60	128	85	52	52	76	45	55	49	0	0	0	0	0	829	Bacteria{superkingdom}(100);Chloroflexi{phylum}(100);Chloroflexia{class}(100);{order}(100);{family}(100);{genus}(100);uncultured_bacterium{species}(100)	Bacteria	Chloroflexi	Chloroflexia				uncultured_bacterium
ASV634	144	0	12	0	110	201	30	0	0	0	38	0	0	0	0	0	0	535	Bacteria{superkingdom}(100);Bacteroidetes{phylum}(100);Sphingobacteriia{class}(100);Sphingobacteriales{order}(100);Chitinophagaceae{family}(100);Niastella{genus}(100);Unassigned{species}(0)	Bacteria	Bacteroidetes	Sphingobacteriia	Sphingobacteriales	Chitinophagaceae	Niastella	Unassigned
ASV635	0	0	0	50	0	54	0	0	0	0	0	0	0	0	0	0	0	104	Bacteria{superkingdom}(100);Acidobacteria{phylum}(100);Acidobacteria_Gp6{class}(100);{order}(100);{family}(100);Gp6{genus}(100);Unassigned{species}(0)	Bacteria	Acidobacteria	Acidobacteria_Gp6			Gp6	Unassigned
ASV636	0	13	0	0	0	0	0	0	0	0	0	37	0	0	0	0	0	50	Bacteria{superkingdom}(92);Proteobacteria{phylum}(92);Betaproteobacteria{class}(92);Burkholderiales{order}(92);Comamonadaceae{family}(92);Variovorax{genus}(92);Unassigned{species}(0)	Bacteria	Proteobacteria	Betaproteobacteria	Burkholderiales	Comamonadaceae	Variovorax	Unassigned
ASV637	223	60	103	0	43	33	252	164	70	170	27	155	13	0	0	19	0	1332	Bacteria{superkingdom}(93);Actinobacteria{phylum}(93);Actinobacteria{class}(93);Solirubrobacterales{order}(93);{family}(93);{genus}(93);Unassigned{species}(0)	Bacteria	Actinobacteria	Actinobacteria	Solirubrobacterales			Unassigned
ASV638	58	56	19	83	125	85	93	30	0	10	29	34	38	8	37	22	28	755	Bacteria{superkingdom}(100);Proteobacteria{phylum}(100);Alphaproteobacteria{class}(100);{order}(100);{family}(100);{genus}(100);rhizosphere_soil_bacterium_RSC-II-82{species}(100)	Bacteria	Proteobacteria	Alphaproteobacteria				rhizosphere_soil_bacterium_RSC-II-82
ASV639	104	63	11	39	0	33	26	11	23	62	66	0	15	114	0	74	50	691	Bacteria{superkingdom}(94);Planctomycetes{phylum}(94);Planctomycetia{class}(94);Planctomycetales{order}(94);Planctomycetaceae{family}(94);Pirellula{genus}(94);uncultured_Firmicutes_bacterium{species}(94)	Bacteria	Planctomycetes	Planctomycetia	Planctomycetales	Planctomycetaceae	Pirellula	uncultured_Firmicutes_bacterium
ASV640	0	0	13	0	0	23	0	0	0	0	0	0	0	0	9	0	0	45	Bacteria{superkingdom}(85);Actinobacteria{phylum}(85);Actinobacteria{class}(85);Actinomycetales{order}(85);Microbacteriaceae{family}(85);Lysinimonas{genus}(85);uncultured_Microbacteriaceae_bacterium{species}(85)	Bacteria	Actinobacteria	Actinobacteria	Actinomycetales	Microbacteriaceae	Lysinimonas	uncultured_Microbacteriaceae_bacterium
ASV641	0	162	53	0	170	0	94	138	133	62	0	79	0	0	0	0	31	922	Bacteria{superkingdom}(100);Proteobacteria{phylum}(100);Betaproteobacteria{class}(100);{order}(100);{family}(100);{genus}(100);Unassigned{species}(0)	Bacteria	Proteobacteria	Betaproteobacteria				Unassigned
ASV642	77	63	36	0	113	39	76	63	45	0	48	18	89	39	10	61	37	814	Bacteria{superkingdom}(94);Planctomycetes{phylum}(94);Planctomycetia{class}(94);Planctomycetales{order}(94);Planctomycetaceae{family}(94);Thermogutta{genus}(94);Unassigned{species}(0)	Bacteria	Planctomycetes	Planctomycetia	Planctomycetales	Planctomycetaceae	Thermogutta	Unassigned
ASV643	0	0	0	60	0	70	0	17	0	7	0	0	0	0	0	0	0	154	Bacteria{superkingdom}(100);Candidatus_Saccharibacteria{phylum}(100);{class}(100);{order}(100);{family}(100);Saccharibacteria_genera_incertae_sedis{genus}(100);Unassigned{species}(0)	Bacteria	Candidatus_Saccharibacteria				Saccharibacteria_genera_incertae_sedis	Unassigned
ASV644	0	49	0	46	472	0	0	31	0	29	45	97	181	52	105	35	82	1224	Bacteria{superkingdom}(99);Proteobacteria{phylum}(99);Betaproteobacteria{class}(99);Burkholderiales{order}(99);Burkholderiales_incertae_sedis{family}(99);Unassigned{genus}(0);Unassigned{species}(0)	Bacteria	Proteobacteria	Betaproteobacteria	Burkholderiales	Burkholderiales_incertae_sedis	Unassigned	Unassigned
ASV645	0	0	0	0	274	470	0	0	0	0	0	0	0	0	0	0	0	744	Bacteria{superkingdom}(97);Proteobacteria{phylum}(97);Alphaproteobacteria{class}(97);Rhizobiales{order}(97);Bradyrhizobiaceae{family}(97);Bradyrhizobium{genus}(97);Unassigned{species}(0)	Bacteria	Proteobacteria	Alphaproteobacteria	Rhizobiales	Bradyrhizobiaceae	Bradyrhizobium	Unassigned
ASV646	114	8	60	108	173	84	0	0	0	0	0	1	15	6	0	0	0	569	Bacteria{superkingdom}(100);Planctomycetes{phylum}(100);Planctomycetia{class}(100);Planctomycetales{order}(100);Planctomycetaceae{family}(100);{genus}(100);Unassigned{species}(0)	Bacteria	Planctomycetes	Planctomycetia	Planctomycetales	Planctomycetaceae		Unassigned
ASV647	0	125	0	0	0	0	0	0	0	19	0	12	28	93	102	156	0	535	Bacteria{superkingdom}(89);Bacteroidetes{phylum}(89);Sphingobacteriia{class}(89);Sphingobacteriales{order}(89);Chitinophagaceae{family}(89);Flavisolibacter{genus}(89);uncultured_Bacteroidetes_bacterium{species}(89)	Bacteria	Bacteroidetes	Sphingobacteriia	Sphingobacteriales	Chitinophagaceae	Flavisolibacter	uncultured_Bacteroidetes_bacterium
ASV648	43	214	39	70	407	101	83	66	80	78	0	45	0	47	0	0	0	1273	Bacteria{superkingdom}(100);Bacteroidetes{phylum}(100);Sphingobacteriia{class}(100);Sphingobacteriales{order}(100);Chitinophagaceae{family}(100);Flavisolibacter{genus}(100);Unassigned{species}(0)	Bacteria	Bacteroidetes	Sphingobacteriia	Sphingobacteriales	Chitinophagaceae	Flavisolibacter	Unassigned
ASV649	57	0	36	71	343	123	0	0	0	0	0	0	0	0	0	0	0	630	Bacteria{superkingdom}(100);Planctomycetes{phylum}(100);Planctomycetia{class}(100);Planctomycetales{order}(100);Planctomycetaceae{family}(100);Gemmata{genus}(100);Unassigned{species}(0)	Bacteria	Planctomycetes	Planctomycetia	Planctomycetales	Planctomycetaceae	Gemmata	Unassigned
ASV650	0	0	0	0	0	0	0	1047	212	204	0	0	0	0	0	0	0	1463	Bacteria{superkingdom}(100);Proteobacteria{phylum}(100);Alphaproteobacteria{class}(100);Rhizobiales{order}(100);Methylobacteriaceae{family}(100);Microvirga{genus}(100);Unassigned{species}(0)	Bacteria	Proteobacteria	Alphaproteobacteria	Rhizobiales	Methylobacteriaceae	Microvirga	Unassigned
ASV651	69	136	151	16	38	130	50	15	4	5	0	4	0	0	0	0	6	624	Bacteria{superkingdom}(100);Acidobacteria{phylum}(100);Acidobacteria_Gp16{class}(100);{order}(100);{family}(100);Gp16{genus}(100);Unassigned{species}(0)	Bacteria	Acidobacteria	Acidobacteria_Gp16			Gp16	Unassigned
ASV652	168	60	325	37	0	64	0	0	0	23	41	22	0	0	0	0	71	811	Bacteria{superkingdom}(100);Acidobacteria{phylum}(100);Acidobacteria_Gp7{class}(100);{order}(100);{family}(100);Gp7{genus}(100);Unassigned{species}(0)	Bacteria	Acidobacteria	Acidobacteria_Gp7			Gp7	Unassigned
ASV653	0	36	0	0	32	0	18	11	54	49	0	14	875	36	134	68	0	1327	Bacteria{superkingdom}(100);Bacteroidetes{phylum}(100);Sphingobacteriia{class}(100);Sphingobacteriales{order}(100);Chitinophagaceae{family}(100);Unassigned{genus}(0);Unassigned{species}(0)	Bacteria	Bacteroidetes	Sphingobacteriia	Sphingobacteriales	Chitinophagaceae	Unassigned	Unassigned
ASV654	0	138	2	0	0	0	0	43	62	72	14	15	95	48	137	84	172	882	Bacteria{superkingdom}(98);Chloroflexi{phylum}(98);Chloroflexia{class}(98);{order}(98);{family}(98);{genus}(98);uncultured_bacterium{species}(98)	Bacteria	Chloroflexi	Chloroflexia				uncultured_bacterium
ASV655	0	250	0	0	0	0	0	0	0	104	0	0	0	0	19	51	0	424	Bacteria{superkingdom}(100);Actinobacteria{phylum}(100);Actinobacteria{class}(100);Actinomycetales{order}(100);Pseudonocardiaceae{family}(100);Pseudonocardia{genus}(100);Unassigned{species}(0)	Bacteria	Actinobacteria	Actinobacteria	Actinomycetales	Pseudonocardiaceae	Pseudonocardia	Unassigned
ASV656	0	0	0	0	0	0	0	0	0	0	32	30	0	152	38	94	5	351	Bacteria{superkingdom}(100);Chloroflexi{phylum}(100);Thermomicrobia{class}(100);Unassigned{order}(0);Unassigned{family}(0);Unassigned{genus}(0);Unassigned{species}(0)	Bacteria	Chloroflexi	Thermomicrobia	Unassigned	Unassigned	Unassigned	Unassigned
ASV657	40	94	32	23	32	24	81	16	66	74	80	29	50	70	92	44	95	942	Bacteria{superkingdom}(83);Chloroflexi{phylum}(83);Anaerolineae{class}(83);Anaerolineales{order}(83);Anaerolineaceae{family}(83);{genus}(83);Unassigned{species}(0)	Bacteria	Chloroflexi	Anaerolineae	Anaerolineales	Anaerolineaceae		Unassigned
ASV659	108	74	15	0	0	42	63	34	117	19	0	0	0	0	0	53	0	525	Bacteria{superkingdom}(100);Acidobacteria{phylum}(100);Acidobacteria_Gp6{class}(100);{order}(100);{family}(100);Gp6{genus}(100);Unassigned{species}(0)	Bacteria	Acidobacteria	Acidobacteria_Gp6			Gp6	Unassigned
ASV662	80	0	0	0	0	0	0	0	0	0	0	0	0	0	0	0	0	80	Bacteria{superkingdom}(93);Proteobacteria{phylum}(93);Deltaproteobacteria{class}(93);{order}(93);{family}(93);{genus}(93);uncultured_Acidobacteriales_bacterium{species}(93)	Bacteria	Proteobacteria	Deltaproteobacteria				uncultured_Acidobacteriales_bacterium
ASV663	0	384	0	0	0	0	50	373	78	74	0	64	0	0	0	47	0	1070	Bacteria{superkingdom}(100);Bacteroidetes{phylum}(100);Sphingobacteriia{class}(100);Sphingobacteriales{order}(100);Chitinophagaceae{family}(100);Unassigned{genus}(0);Unassigned{species}(0)	Bacteria	Bacteroidetes	Sphingobacteriia	Sphingobacteriales	Chitinophagaceae	Unassigned	Unassigned
ASV664	33	0	46	103	0	72	429	61	39	28	124	76	123	166	57	20	50	1427	Bacteria{superkingdom}(100);Actinobacteria{phylum}(100);Actinobacteria{class}(100);Gaiellales{order}(100);Gaiellaceae{family}(100);Gaiella{genus}(100);uncultured_Actinomycetales_bacterium{species}(100)	Bacteria	Actinobacteria	Actinobacteria	Gaiellales	Gaiellaceae	Gaiella	uncultured_Actinomycetales_bacterium
ASV665	69	0	15	40	0	51	91	36	0	0	172	0	67	25	0	0	33	599	Bacteria{superkingdom}(99);{phylum}(99);{class}(99);{order}(99);{family}(99);{genus}(99);uncultured_Syntrophobacterales_bacterium{species}(99)	Bacteria						uncultured_Syntrophobacterales_bacterium
ASV666	90	36	43	25	45	25	23	2	13	13	24	12	24	10	6	0	2	393	Bacteria{superkingdom}(100);Proteobacteria{phylum}(100);Alphaproteobacteria{class}(100);Rhizobiales{order}(100);Unassigned{family}(0);Unassigned{genus}(0);Unassigned{species}(0)	Bacteria	Proteobacteria	Alphaproteobacteria	Rhizobiales	Unassigned	Unassigned	Unassigned
ASV667	40	86	92	35	140	100	29	31	11	0	42	11	75	34	0	7	28	761	Bacteria{superkingdom}(86);Chloroflexi{phylum}(86);Anaerolineae{class}(86);Anaerolineales{order}(86);Anaerolineaceae{family}(86);Unassigned{genus}(0);Unassigned{species}(0)	Bacteria	Chloroflexi	Anaerolineae	Anaerolineales	Anaerolineaceae	Unassigned	Unassigned
ASV668	117	0	136	0	707	465	0	0	112	133	0	0	0	0	0	0	0	1670	Bacteria{superkingdom}(100);Actinobacteria{phylum}(100);Actinobacteria{class}(100);Actinomycetales{order}(100);Nocardioidaceae{family}(100);Kribbella{genus}(100);Unassigned{species}(0)	Bacteria	Actinobacteria	Actinobacteria	Actinomycetales	Nocardioidaceae	Kribbella	Unassigned
ASV669	83	86	57	40	74	38	49	230	91	77	35	57	18	33	0	9	11	988	Bacteria{superkingdom}(84);Chloroflexi{phylum}(84);Chloroflexia{class}(84);{order}(84);{family}(84);{genus}(84);uncultured_bacterium{species}(84)	Bacteria	Chloroflexi	Chloroflexia				uncultured_bacterium
ASV670	79	0	15	0	0	51	131	0	0	0	66	0	0	0	0	0	0	342	Bacteria{superkingdom}(100);Proteobacteria{phylum}(100);Betaproteobacteria{class}(100);{order}(100);{family}(100);{genus}(100);Unassigned{species}(0)	Bacteria	Proteobacteria	Betaproteobacteria				Unassigned
ASV671	97	13	0	262	0	0	0	0	63	219	80	23	121	0	67	0	7	952	Bacteria{superkingdom}(87);Firmicutes{phylum}(87);Bacilli{class}(87);Bacillales{order}(87);Bacillaceae_1{family}(87);Domibacillus{genus}(87);uncultured_bacterium{species}(87)	Bacteria	Firmicutes	Bacilli	Bacillales	Bacillaceae_1	Domibacillus	uncultured_bacterium
ASV672	28	0	37	68	110	0	0	29	39	59	0	39	21	0	0	0	26	456	Bacteria{superkingdom}(100);Proteobacteria{phylum}(100);Betaproteobacteria{class}(100);Burkholderiales{order}(100);Unassigned{family}(0);Unassigned{genus}(0);Unassigned{species}(0)	Bacteria	Proteobacteria	Betaproteobacteria	Burkholderiales	Unassigned	Unassigned	Unassigned
ASV673	28	37	6	40	0	54	8	0	0	0	0	0	0	0	0	0	10	183	Bacteria{superkingdom}(100);Proteobacteria{phylum}(100);Alphaproteobacteria{class}(100);Rhizobiales{order}(100);Bradyrhizobiaceae{family}(100);Bosea{genus}(100);Unassigned{species}(0)	Bacteria	Proteobacteria	Alphaproteobacteria	Rhizobiales	Bradyrhizobiaceae	Bosea	Unassigned
ASV674	28	0	0	74	32	142	0	0	0	0	0	0	0	0	0	0	42	318	Bacteria{superkingdom}(100);Proteobacteria{phylum}(100);Alphaproteobacteria{class}(100);Rhodospirillales{order}(100);Rhodospirillaceae{family}(100);Dongia{genus}(100);Unassigned{species}(0)	Bacteria	Proteobacteria	Alphaproteobacteria	Rhodospirillales	Rhodospirillaceae	Dongia	Unassigned
ASV675	36	0	19	46	1236	27	0	5	9	0	0	0	0	0	0	0	0	1378	Bacteria{superkingdom}(97);Bacteroidetes{phylum}(97);Sphingobacteriia{class}(97);Sphingobacteriales{order}(97);Chitinophagaceae{family}(97);{genus}(97);Unassigned{species}(0)	Bacteria	Bacteroidetes	Sphingobacteriia	Sphingobacteriales	Chitinophagaceae		Unassigned
ASV676	4	0	55	158	120	15	22	33	8	20	157	6	292	0	0	0	4	894	Bacteria{superkingdom}(94);Firmicutes{phylum}(94);Bacilli{class}(94);Bacillales{order}(94);Bacillaceae_1{family}(94);Bacillus{genus}(94);Unassigned{species}(0)	Bacteria	Firmicutes	Bacilli	Bacillales	Bacillaceae_1	Bacillus	Unassigned
ASV678	0	0	0	278	0	0	3	0	0	0	14	0	0	0	0	0	0	295	Bacteria{superkingdom}(97);Actinobacteria{phylum}(97);Actinobacteria{class}(97);Actinomycetales{order}(97);Nocardiaceae{family}(97);Nocardia{genus}(97);Unassigned{species}(0)	Bacteria	Actinobacteria	Actinobacteria	Actinomycetales	Nocardiaceae	Nocardia	Unassigned
ASV680	70	32	39	29	351	70	43	37	68	37	14	27	0	16	0	0	0	833	Bacteria{superkingdom}(100);Bacteroidetes{phylum}(100);Sphingobacteriia{class}(100);Sphingobacteriales{order}(100);Chitinophagaceae{family}(100);Unassigned{genus}(0);Unassigned{species}(0)	Bacteria	Bacteroidetes	Sphingobacteriia	Sphingobacteriales	Chitinophagaceae	Unassigned	Unassigned
ASV681	18	17	43	0	41	72	32	26	0	0	32	5	0	0	0	0	0	286	Bacteria{superkingdom}(98);Chloroflexi{phylum}(98);Unassigned{class}(0);Unassigned{order}(0);Unassigned{family}(0);Unassigned{genus}(0);Unassigned{species}(0)	Bacteria	Chloroflexi	Unassigned	Unassigned	Unassigned	Unassigned	Unassigned
ASV683	75	0	87	91	198	65	0	75	78	0	0	61	0	0	0	0	56	786	Bacteria{superkingdom}(100);Chloroflexi{phylum}(100);Anaerolineae{class}(100);Anaerolineales{order}(100);Anaerolineaceae{family}(100);{genus}(100);uncultured_soil_bacterium{species}(100)	Bacteria	Chloroflexi	Anaerolineae	Anaerolineales	Anaerolineaceae		uncultured_soil_bacterium
ASV684	0	0	32	83	69	0	42	19	0	33	66	15	155	74	18	14	47	667	Bacteria{superkingdom}(93);Actinobacteria{phylum}(93);Actinobacteria{class}(93);Acidimicrobiales{order}(93);Iamiaceae{family}(93);{genus}(93);uncultured_Iamia_sp.{species}(93)	Bacteria	Actinobacteria	Actinobacteria	Acidimicrobiales	Iamiaceae		uncultured_Iamia_sp.
ASV685	0	110	0	111	181	0	0	0	0	0	0	0	0	0	0	0	0	402	Bacteria{superkingdom}(100);Chloroflexi{phylum}(100);Thermomicrobia{class}(100);Sphaerobacterales{order}(100);Sphaerobacteraceae{family}(100);Sphaerobacter{genus}(100);uncultured_bacterium{species}(100)	Bacteria	Chloroflexi	Thermomicrobia	Sphaerobacterales	Sphaerobacteraceae	Sphaerobacter	uncultured_bacterium
ASV686	0	61	0	0	0	0	14	35	58	45	0	44	0	0	12	96	26	391	Bacteria{superkingdom}(90);Armatimonadetes{phylum}(90);Armatimonadia{class}(90);Armatimonadales{order}(90);Armatimonadaceae{family}(90);Armatimonas/Armatimonadetes_gp1{genus}(90);uncultured_bacterium{species}(90)	Bacteria	Armatimonadetes	Armatimonadia	Armatimonadales	Armatimonadaceae	Armatimonas/Armatimonadetes_gp1	uncultured_bacterium
ASV687	25	0	20	0	0	24	139	0	6	0	130	0	0	0	0	0	44	388	Bacteria{superkingdom}(99);{phylum}(99);{class}(99);{order}(99);{family}(99);{genus}(99);uncultured_Actinomyces_sp.{species}(99)	Bacteria						uncultured_Actinomyces_sp.
ASV688	0	58	0	0	0	0	0	9	0	52	0	15	0	0	0	0	0	134	Bacteria{superkingdom}(100);Chloroflexi{phylum}(100);Caldilineae{class}(100);Caldilineales{order}(100);Caldilineaceae{family}(100);Litorilinea{genus}(100);uncultured_Rubrobacter_sp.{species}(100)	Bacteria	Chloroflexi	Caldilineae	Caldilineales	Caldilineaceae	Litorilinea	uncultured_Rubrobacter_sp.
ASV689	35	0	15	32	0	0	311	409	231	77	0	166	31	12	0	7	103	1429	Bacteria{superkingdom}(97);Acidobacteria{phylum}(97);Acidobacteria_Gp6{class}(97);{order}(97);{family}(97);Gp6{genus}(97);uncultured_Acidobacterium_sp.{species}(97)	Bacteria	Acidobacteria	Acidobacteria_Gp6			Gp6	uncultured_Acidobacterium_sp.
ASV690	0	0	0	29	0	193	0	0	0	0	0	0	0	0	0	0	0	222	Bacteria{superkingdom}(99);Actinobacteria{phylum}(99);Actinobacteria{class}(99);Actinomycetales{order}(99);Streptomycetaceae{family}(99);Streptomyces{genus}(99);Unassigned{species}(0)	Bacteria	Actinobacteria	Actinobacteria	Actinomycetales	Streptomycetaceae	Streptomyces	Unassigned
ASV691	15	858	0	103	29	0	0	0	0	40	0	64	0	315	24	47	131	1626	Bacteria{superkingdom}(100);Actinobacteria{phylum}(100);Unassigned{class}(0);Unassigned{order}(0);Unassigned{family}(0);Unassigned{genus}(0);Unassigned{species}(0)	Bacteria	Actinobacteria	Unassigned	Unassigned	Unassigned	Unassigned	Unassigned
ASV692	0	224	0	0	0	0	0	0	0	0	0	0	0	0	0	0	0	224	Bacteria{superkingdom}(100);Actinobacteria{phylum}(100);Actinobacteria{class}(100);Actinomycetales{order}(100);Streptomycetaceae{family}(100);Streptomyces{genus}(100);Unassigned{species}(0)	Bacteria	Actinobacteria	Actinobacteria	Actinomycetales	Streptomycetaceae	Streptomyces	Unassigned
ASV693	0	63	0	56	0	77	0	0	0	76	0	58	43	75	134	69	63	714	Bacteria{superkingdom}(100);Proteobacteria{phylum}(100);Betaproteobacteria{class}(100);{order}(100);{family}(100);{genus}(100);Unassigned{species}(0)	Bacteria	Proteobacteria	Betaproteobacteria				Unassigned
ASV694	65	134	48	40	59	44	138	54	79	47	24	36	26	65	38	53	77	1027	Bacteria{superkingdom}(89);{phylum}(89);{class}(89);{order}(89);{family}(89);{genus}(89);uncultured_Heliobacterium_sp.{species}(89)	Bacteria						uncultured_Heliobacterium_sp.
ASV695	37	0	31	139	404	101	0	0	0	0	11	0	8	0	0	0	0	731	Bacteria{superkingdom}(100);Proteobacteria{phylum}(100);Alphaproteobacteria{class}(100);Rhodospirillales{order}(100);Rhodospirillaceae{family}(100);Dongia{genus}(100);Unassigned{species}(0)	Bacteria	Proteobacteria	Alphaproteobacteria	Rhodospirillales	Rhodospirillaceae	Dongia	Unassigned
ASV696	47	5	3	0	74	0	0	0	7	0	0	1	0	0	0	0	0	137	Bacteria{superkingdom}(100);Proteobacteria{phylum}(100);Alphaproteobacteria{class}(100);Rhizobiales{order}(100);Unassigned{family}(0);Unassigned{genus}(0);Unassigned{species}(0)	Bacteria	Proteobacteria	Alphaproteobacteria	Rhizobiales	Unassigned	Unassigned	Unassigned
ASV697	236	51	37	0	0	0	0	0	49	47	0	0	0	0	0	0	23	443	Bacteria{superkingdom}(98);Acidobacteria{phylum}(98);Acidobacteria_Gp16{class}(98);{order}(98);{family}(98);Gp16{genus}(98);uncultured_bacterium{species}(98)	Bacteria	Acidobacteria	Acidobacteria_Gp16			Gp16	uncultured_bacterium
ASV698	46	0	3	26	508	0	0	0	0	0	0	0	0	0	0	0	0	583	Bacteria{superkingdom}(91);Proteobacteria{phylum}(91);Alphaproteobacteria{class}(91);Rhizobiales{order}(91);Phyllobacteriaceae{family}(91);Phyllobacterium{genus}(91);Phyllobacterium_ifriqiyense{species}(91)	Bacteria	Proteobacteria	Alphaproteobacteria	Rhizobiales	Phyllobacteriaceae	Phyllobacterium	Phyllobacterium_ifriqiyense
ASV699	81	0	42	56	52	131	39	38	13	35	41	0	137	32	49	37	56	839	Bacteria{superkingdom}(88);Chloroflexi{phylum}(88);{class}(88);{order}(88);{family}(88);{genus}(88);Unassigned{species}(0)	Bacteria	Chloroflexi					Unassigned
ASV700	35	0	23	95	59	210	27	0	0	0	0	0	66	0	0	0	17	532	Bacteria{superkingdom}(100);Acidobacteria{phylum}(100);Acidobacteria_Gp6{class}(100);{order}(100);{family}(100);Gp6{genus}(100);Unassigned{species}(0)	Bacteria	Acidobacteria	Acidobacteria_Gp6			Gp6	Unassigned
ASV701	47	27	58	0	321	0	0	7	0	0	0	0	0	0	0	0	11	471	Bacteria{superkingdom}(100);Bacteroidetes{phylum}(100);Sphingobacteriia{class}(100);Sphingobacteriales{order}(100);Chitinophagaceae{family}(100);Unassigned{genus}(0);Unassigned{species}(0)	Bacteria	Bacteroidetes	Sphingobacteriia	Sphingobacteriales	Chitinophagaceae	Unassigned	Unassigned
ASV702	155	0	61	82	153	0	0	13	0	0	0	0	0	0	0	15	0	479	Bacteria{superkingdom}(98);Proteobacteria{phylum}(98);Alphaproteobacteria{class}(98);Rhizobiales{order}(98);Rhizobiaceae{family}(98);Shinella{genus}(98);Unassigned{species}(0)	Bacteria	Proteobacteria	Alphaproteobacteria	Rhizobiales	Rhizobiaceae	Shinella	Unassigned
ASV703	42	32	32	50	96	57	2	0	0	0	0	9	0	10	0	0	14	344	Bacteria{superkingdom}(99);Proteobacteria{phylum}(99);Alphaproteobacteria{class}(99);Rhizobiales{order}(99);Phyllobacteriaceae{family}(99);Mesorhizobium{genus}(99);Unassigned{species}(0)	Bacteria	Proteobacteria	Alphaproteobacteria	Rhizobiales	Phyllobacteriaceae	Mesorhizobium	Unassigned
ASV704	24	0	21	16	0	64	0	0	0	0	0	0	0	0	0	0	0	125	Bacteria{superkingdom}(100);Armatimonadetes{phylum}(100);{class}(100);{order}(100);{family}(100);Armatimonadetes_gp4{genus}(100);Unassigned{species}(0)	Bacteria	Armatimonadetes				Armatimonadetes_gp4	Unassigned
ASV705	0	0	15	0	3216	148	48	14	39	0	0	0	0	0	0	27	0	3507	Bacteria{superkingdom}(86);Bacteroidetes{phylum}(86);Sphingobacteriia{class}(86);Sphingobacteriales{order}(86);Chitinophagaceae{family}(86);Taibaiella{genus}(86);Unassigned{species}(0)	Bacteria	Bacteroidetes	Sphingobacteriia	Sphingobacteriales	Chitinophagaceae	Taibaiella	Unassigned
ASV706	0	151	70	68	41	95	34	0	0	0	0	0	0	0	0	0	0	459	Bacteria{superkingdom}(100);Acidobacteria{phylum}(100);Acidobacteria_Gp6{class}(100);{order}(100);{family}(100);Gp6{genus}(100);Unassigned{species}(0)	Bacteria	Acidobacteria	Acidobacteria_Gp6			Gp6	Unassigned
ASV707	363	0	769	24	108	201	0	0	0	0	0	0	441	0	0	0	6	1912	Bacteria{superkingdom}(100);{phylum}(100);{class}(100);{order}(100);{family}(100);{genus}(100);uncultured_Gemmatimonadetes_bacterium{species}(100)	Bacteria						uncultured_Gemmatimonadetes_bacterium
ASV708	149	0	271	124	353	150	0	0	0	0	35	0	139	0	0	0	0	1221	Bacteria{superkingdom}(100);Actinobacteria{phylum}(100);Actinobacteria{class}(100);Acidimicrobiales{order}(100);Unassigned{family}(0);Unassigned{genus}(0);Unassigned{species}(0)	Bacteria	Actinobacteria	Actinobacteria	Acidimicrobiales	Unassigned	Unassigned	Unassigned
ASV709	72	0	213	0	81	33	191	55	45	110	29	0	0	0	0	0	0	829	Bacteria{superkingdom}(100);Actinobacteria{phylum}(100);Actinobacteria{class}(100);Gaiellales{order}(100);Gaiellaceae{family}(100);Gaiella{genus}(100);Unassigned{species}(0)	Bacteria	Actinobacteria	Actinobacteria	Gaiellales	Gaiellaceae	Gaiella	Unassigned
ASV710	0	53	7	0	0	0	0	0	0	0	0	0	0	0	0	0	0	60	Bacteria{superkingdom}(96);Actinobacteria{phylum}(96);Actinobacteria{class}(96);Actinomycetales{order}(96);Pseudonocardiaceae{family}(96);Amycolatopsis{genus}(96);Unassigned{species}(0)	Bacteria	Actinobacteria	Actinobacteria	Actinomycetales	Pseudonocardiaceae	Amycolatopsis	Unassigned
ASV711	72	0	0	36	0	0	0	0	24	103	0	11	0	36	28	20	2	332	Bacteria{superkingdom}(100);Firmicutes{phylum}(100);Bacilli{class}(100);Bacillales{order}(100);Bacillaceae_1{family}(100);Domibacillus{genus}(100);Unassigned{species}(0)	Bacteria	Firmicutes	Bacilli	Bacillales	Bacillaceae_1	Domibacillus	Unassigned
ASV713	84	17	50	0	160	87	68	81	18	0	29	29	0	0	0	0	21	644	Bacteria{superkingdom}(94);Chloroflexi{phylum}(94);{class}(94);{order}(94);{family}(94);{genus}(94);Unassigned{species}(0)	Bacteria	Chloroflexi					Unassigned
ASV714	0	263	32	0	59	0	0	51	48	76	0	0	0	0	0	9	0	538	Bacteria{superkingdom}(98);Proteobacteria{phylum}(98);Betaproteobacteria{class}(98);{order}(98);{family}(98);{genus}(98);Unassigned{species}(0)	Bacteria	Proteobacteria	Betaproteobacteria				Unassigned
ASV715	50	47	32	28	45	35	100	64	36	62	0	55	65	104	56	38	46	863	Bacteria{superkingdom}(100);Proteobacteria{phylum}(100);Betaproteobacteria{class}(100);Burkholderiales{order}(100);Burkholderiaceae{family}(100);Ralstonia{genus}(100);Unassigned{species}(0)	Bacteria	Proteobacteria	Betaproteobacteria	Burkholderiales	Burkholderiaceae	Ralstonia	Unassigned
ASV716	42	0	31	51	32	0	19	13	15	75	26	27	4	0	43	14	0	392	Bacteria{superkingdom}(100);Actinobacteria{phylum}(100);Actinobacteria{class}(100);Actinomycetales{order}(100);Nocardioidaceae{family}(100);Nocardioides{genus}(100);Unassigned{species}(0)	Bacteria	Actinobacteria	Actinobacteria	Actinomycetales	Nocardioidaceae	Nocardioides	Unassigned
ASV717	93	0	39	0	59	72	0	0	0	0	0	0	75	0	26	36	0	400	Bacteria{superkingdom}(85);Actinobacteria{phylum}(85);Actinobacteria{class}(85);Solirubrobacterales{order}(85);Solirubrobacteraceae{family}(85);Solirubrobacter{genus}(85);uncultured_bacterium{species}(85)	Bacteria	Actinobacteria	Actinobacteria	Solirubrobacterales	Solirubrobacteraceae	Solirubrobacter	uncultured_bacterium
ASV718	112	0	92	208	337	252	134	11	18	24	33	0	0	0	42	0	11	1274	Bacteria{superkingdom}(100);Firmicutes{phylum}(100);Bacilli{class}(100);Bacillales{order}(100);Paenibacillaceae_1{family}(100);Paenibacillus{genus}(100);Unassigned{species}(0)	Bacteria	Firmicutes	Bacilli	Bacillales	Paenibacillaceae_1	Paenibacillus	Unassigned
ASV719	86	19	72	31	59	54	27	11	22	25	53	0	0	0	0	0	17	476	Bacteria{superkingdom}(100);Verrucomicrobia{phylum}(100);Verrucomicrobiae{class}(100);Verrucomicrobiales{order}(100);Verrucomicrobiaceae{family}(100);{genus}(100);uncultured_Haloferula_sp.{species}(100)	Bacteria	Verrucomicrobia	Verrucomicrobiae	Verrucomicrobiales	Verrucomicrobiaceae		uncultured_Haloferula_sp.
ASV720	157	0	65	41	27	0	34	0	17	19	14	23	109	53	21	11	140	731	Bacteria{superkingdom}(99);Actinobacteria{phylum}(99);Actinobacteria{class}(99);Actinomycetales{order}(99);Nocardioidaceae{family}(99);Aeromicrobium{genus}(99);Unassigned{species}(0)	Bacteria	Actinobacteria	Actinobacteria	Actinomycetales	Nocardioidaceae	Aeromicrobium	Unassigned
ASV721	33	0	0	0	0	0	42	0	0	0	0	0	0	0	0	26	0	101	Bacteria{superkingdom}(99);Actinobacteria{phylum}(99);Actinobacteria{class}(99);Solirubrobacterales{order}(99);Conexibacteraceae{family}(99);Conexibacter{genus}(99);Unassigned{species}(0)	Bacteria	Actinobacteria	Actinobacteria	Solirubrobacterales	Conexibacteraceae	Conexibacter	Unassigned
ASV722	0	0	23	0	145	77	0	11	14	0	0	6	11	0	0	0	0	287	Bacteria{superkingdom}(97);Planctomycetes{phylum}(97);Planctomycetia{class}(97);Planctomycetales{order}(97);Planctomycetaceae{family}(97);Blastopirellula{genus}(97);Unassigned{species}(0)	Bacteria	Planctomycetes	Planctomycetia	Planctomycetales	Planctomycetaceae	Blastopirellula	Unassigned
ASV723	0	27	0	47	1286	46	47	17	61	0	0	0	0	0	0	0	0	1531	Bacteria{superkingdom}(100);Unassigned{phylum}(0);Unassigned{class}(0);Unassigned{order}(0);Unassigned{family}(0);Unassigned{genus}(0);Unassigned{species}(0)	Bacteria	Unassigned	Unassigned	Unassigned	Unassigned	Unassigned	Unassigned
ASV724	15	21	26	97	41	0	64	44	59	86	45	40	0	57	62	57	52	766	Bacteria{superkingdom}(98);Proteobacteria{phylum}(98);Deltaproteobacteria{class}(98);Myxococcales{order}(98);{family}(98);{genus}(98);Unassigned{species}(0)	Bacteria	Proteobacteria	Deltaproteobacteria	Myxococcales			Unassigned
ASV726	48	106	18	25	43	0	12	85	68	85	0	77	14	102	182	143	57	1065	Bacteria{superkingdom}(87);Actinobacteria{phylum}(87);Actinobacteria{class}(87);Actinomycetales{order}(87);Geodermatophilaceae{family}(87);Blastococcus{genus}(87);Unassigned{species}(0)	Bacteria	Actinobacteria	Actinobacteria	Actinomycetales	Geodermatophilaceae	Blastococcus	Unassigned
ASV727	0	0	0	0	67	0	0	0	0	0	0	0	0	0	0	0	0	67	Bacteria{superkingdom}(100);Bacteroidetes{phylum}(100);Cytophagia{class}(100);Cytophagales{order}(100);{family}(100);Ohtaekwangia{genus}(100);Unassigned{species}(0)	Bacteria	Bacteroidetes	Cytophagia	Cytophagales		Ohtaekwangia	Unassigned
ASV728	29	106	15	44	91	35	0	24	37	60	0	24	0	7	23	11	0	506	Bacteria{superkingdom}(92);Actinobacteria{phylum}(92);Actinobacteria{class}(92);Solirubrobacterales{order}(92);{family}(92);{genus}(92);Unassigned{species}(0)	Bacteria	Actinobacteria	Actinobacteria	Solirubrobacterales			Unassigned
ASV729	6	0	0	0	170	42	0	0	0	0	0	0	10	0	0	0	0	228	Bacteria{superkingdom}(99);Planctomycetes{phylum}(99);Planctomycetia{class}(99);Planctomycetales{order}(99);Planctomycetaceae{family}(99);{genus}(99);uncultured_Planctomyces_sp.{species}(99)	Bacteria	Planctomycetes	Planctomycetia	Planctomycetales	Planctomycetaceae		uncultured_Planctomyces_sp.
ASV730	54	72	23	44	88	33	15	0	0	46	58	32	21	17	14	13	50	580	Bacteria{superkingdom}(83);Proteobacteria{phylum}(83);Alphaproteobacteria{class}(83);Rhizobiales{order}(83);Rhizobiales_incertae_sedis{family}(83);Vasilyevaea{genus}(83);uncultured_bacterium{species}(83)	Bacteria	Proteobacteria	Alphaproteobacteria	Rhizobiales	Rhizobiales_incertae_sedis	Vasilyevaea	uncultured_bacterium
ASV731	0	0	51	63	219	63	0	0	7	0	0	1	0	0	0	0	0	404	Bacteria{superkingdom}(96);Candidatus_Saccharibacteria{phylum}(96);{class}(96);{order}(96);{family}(96);Saccharibacteria_genera_incertae_sedis{genus}(96);uncultured_candidate_division_TM7_bacterium{species}(96)	Bacteria	Candidatus_Saccharibacteria				Saccharibacteria_genera_incertae_sedis	uncultured_candidate_division_TM7_bacterium
ASV732	111	68	26	58	69	0	20	37	25	56	0	60	121	65	75	53	51	895	Bacteria{superkingdom}(86);Actinobacteria{phylum}(86);Actinobacteria{class}(86);{order}(86);{family}(86);{genus}(86);Unassigned{species}(0)	Bacteria	Actinobacteria	Actinobacteria				Unassigned
ASV733	39	21	0	34	59	21	10	15	0	12	0	0	9	11	43	0	9	283	Bacteria{superkingdom}(91);Bacteroidetes{phylum}(91);Sphingobacteriia{class}(91);Sphingobacteriales{order}(91);Chitinophagaceae{family}(91);{genus}(91);uncultured_Cytophaga_sp.{species}(91)	Bacteria	Bacteroidetes	Sphingobacteriia	Sphingobacteriales	Chitinophagaceae		uncultured_Cytophaga_sp.
ASV734	16	0	2	0	36	24	0	0	0	0	5	0	50	0	0	0	0	133	Bacteria{superkingdom}(100);Unassigned{phylum}(0);Unassigned{class}(0);Unassigned{order}(0);Unassigned{family}(0);Unassigned{genus}(0);Unassigned{species}(0)	Bacteria	Unassigned	Unassigned	Unassigned	Unassigned	Unassigned	Unassigned
ASV735	76	0	9	18	67	0	18	27	95	114	90	86	71	15	118	100	28	932	Bacteria{superkingdom}(92);Proteobacteria{phylum}(92);Betaproteobacteria{class}(92);Burkholderiales{order}(92);Comamonadaceae{family}(92);Ramlibacter{genus}(92);Unassigned{species}(0)	Bacteria	Proteobacteria	Betaproteobacteria	Burkholderiales	Comamonadaceae	Ramlibacter	Unassigned
ASV736	40	0	23	0	0	123	0	0	0	0	0	0	0	0	0	34	0	220	Bacteria{superkingdom}(100);Chloroflexi{phylum}(100);Thermomicrobia{class}(100);Sphaerobacterales{order}(100);Sphaerobacteraceae{family}(100);Unassigned{genus}(0);Unassigned{species}(0)	Bacteria	Chloroflexi	Thermomicrobia	Sphaerobacterales	Sphaerobacteraceae	Unassigned	Unassigned
ASV737	0	0	0	29	0	0	0	0	0	0	0	0	0	0	0	0	0	29	Bacteria{superkingdom}(94);Actinobacteria{phylum}(94);Actinobacteria{class}(94);Actinomycetales{order}(94);Pseudonocardiaceae{family}(94);Amycolatopsis{genus}(94);Unassigned{species}(0)	Bacteria	Actinobacteria	Actinobacteria	Actinomycetales	Pseudonocardiaceae	Amycolatopsis	Unassigned
ASV738	0	0	0	0	69	0	0	0	6	0	0	23	0	0	48	32	0	178	Bacteria{superkingdom}(100);Bacteroidetes{phylum}(100);Sphingobacteriia{class}(100);Sphingobacteriales{order}(100);Chitinophagaceae{family}(100);{genus}(100);Unassigned{species}(0)	Bacteria	Bacteroidetes	Sphingobacteriia	Sphingobacteriales	Chitinophagaceae		Unassigned
ASV739	0	0	0	0	0	0	0	0	0	0	0	128	0	0	0	11	0	139	Bacteria{superkingdom}(100);Bacteroidetes{phylum}(100);Cytophagia{class}(100);Cytophagales{order}(100);Cytophagaceae{family}(100);Adhaeribacter{genus}(100);Unassigned{species}(0)	Bacteria	Bacteroidetes	Cytophagia	Cytophagales	Cytophagaceae	Adhaeribacter	Unassigned
ASV740	77	0	23	95	227	0	0	0	0	0	0	0	0	13	0	0	0	435	Bacteria{superkingdom}(84);Proteobacteria{phylum}(84);Alphaproteobacteria{class}(84);Rhizobiales{order}(84);Hyphomicrobiaceae{family}(84);Pedomicrobium{genus}(84);uncultured_alpha_proteobacterium{species}(84)	Bacteria	Proteobacteria	Alphaproteobacteria	Rhizobiales	Hyphomicrobiaceae	Pedomicrobium	uncultured_alpha_proteobacterium
ASV741	0	63	0	0	128	56	0	0	0	0	0	0	0	0	0	0	0	247	Bacteria{superkingdom}(100);Cyanobacteria/Chloroplast{phylum}(100);Cyanobacteria{class}(100);{order}(100);Unassigned{family}(0);Unassigned{genus}(0);Unassigned{species}(0)	Bacteria	Cyanobacteria/Chloroplast	Cyanobacteria		Unassigned	Unassigned	Unassigned
ASV742	0	0	0	0	0	430	0	0	0	0	0	0	0	0	0	0	0	430	Bacteria{superkingdom}(97);Actinobacteria{phylum}(97);Actinobacteria{class}(97);Actinomycetales{order}(97);Pseudonocardiaceae{family}(97);Saccharopolyspora{genus}(97);Saccharopolyspora_erythraea{species}(97)	Bacteria	Actinobacteria	Actinobacteria	Actinomycetales	Pseudonocardiaceae	Saccharopolyspora	Saccharopolyspora_erythraea
ASV743	35	0	22	57	135	102	0	0	0	0	0	0	0	0	0	0	0	351	Bacteria{superkingdom}(100);Proteobacteria{phylum}(100);Alphaproteobacteria{class}(100);Rhizobiales{order}(100);Unassigned{family}(0);Unassigned{genus}(0);Unassigned{species}(0)	Bacteria	Proteobacteria	Alphaproteobacteria	Rhizobiales	Unassigned	Unassigned	Unassigned
ASV744	11	22	7	0	20	0	124	390	211	170	173	47	98	20	37	11	212	1553	Bacteria{superkingdom}(97);{phylum}(97);{class}(97);{order}(97);{family}(97);{genus}(97);uncultured_Gemmatimonadetes_bacterium{species}(97)	Bacteria						uncultured_Gemmatimonadetes_bacterium
ASV745	58	0	32	38	242	50	0	0	0	0	0	21	30	30	0	7	16	524	Bacteria{superkingdom}(99);Planctomycetes{phylum}(99);Planctomycetia{class}(99);Planctomycetales{order}(99);Planctomycetaceae{family}(99);{genus}(99);Planctomycetaceae_bacterium_LX124{species}(99)	Bacteria	Planctomycetes	Planctomycetia	Planctomycetales	Planctomycetaceae		Planctomycetaceae_bacterium_LX124
ASV746	119	0	18	55	123	313	0	0	0	0	0	0	21	0	0	7	0	656	Bacteria{superkingdom}(100);Planctomycetes{phylum}(100);Planctomycetia{class}(100);Planctomycetales{order}(100);Planctomycetaceae{family}(100);Singulisphaera{genus}(100);Unassigned{species}(0)	Bacteria	Planctomycetes	Planctomycetia	Planctomycetales	Planctomycetaceae	Singulisphaera	Unassigned
ASV747	0	0	0	0	0	183	0	0	0	0	0	0	0	0	0	3	0	186	Bacteria{superkingdom}(100);Chloroflexi{phylum}(100);Caldilineae{class}(100);Caldilineales{order}(100);Caldilineaceae{family}(100);Litorilinea{genus}(100);uncultured_Litorilinea_sp.{species}(100)	Bacteria	Chloroflexi	Caldilineae	Caldilineales	Caldilineaceae	Litorilinea	uncultured_Litorilinea_sp.
ASV748	100	0	0	0	0	27	33	0	0	0	0	0	0	0	0	0	23	183	Bacteria{superkingdom}(100);Proteobacteria{phylum}(100);Alphaproteobacteria{class}(100);Rhizobiales{order}(100);Unassigned{family}(0);Unassigned{genus}(0);Unassigned{species}(0)	Bacteria	Proteobacteria	Alphaproteobacteria	Rhizobiales	Unassigned	Unassigned	Unassigned
ASV749	0	0	11	17	115	0	5	0	0	0	0	123	38	47	42	31	7	436	Bacteria{superkingdom}(95);Proteobacteria{phylum}(95);Gammaproteobacteria{class}(95);{order}(95);{family}(95);{genus}(95);uncultured_Saccharophagus_sp.{species}(95)	Bacteria	Proteobacteria	Gammaproteobacteria				uncultured_Saccharophagus_sp.
ASV750	0	0	0	0	0	0	0	69	197	0	0	50	0	0	0	0	0	316	Bacteria{superkingdom}(95);Bacteroidetes{phylum}(95);Sphingobacteriia{class}(95);Sphingobacteriales{order}(95);Chitinophagaceae{family}(95);{genus}(95);Unassigned{species}(0)	Bacteria	Bacteroidetes	Sphingobacteriia	Sphingobacteriales	Chitinophagaceae		Unassigned
ASV751	0	0	0	72	0	107	0	0	0	0	0	0	0	0	0	0	0	179	Bacteria{superkingdom}(100);Actinobacteria{phylum}(100);Actinobacteria{class}(100);Actinomycetales{order}(100);Pseudonocardiaceae{family}(100);Amycolatopsis{genus}(100);Unassigned{species}(0)	Bacteria	Actinobacteria	Actinobacteria	Actinomycetales	Pseudonocardiaceae	Amycolatopsis	Unassigned
ASV752	155	47	21	0	138	44	0	58	68	0	0	44	68	0	0	0	0	643	Bacteria{superkingdom}(100);Proteobacteria{phylum}(100);Alphaproteobacteria{class}(100);Rhizobiales{order}(100);Unassigned{family}(0);Unassigned{genus}(0);Unassigned{species}(0)	Bacteria	Proteobacteria	Alphaproteobacteria	Rhizobiales	Unassigned	Unassigned	Unassigned
ASV753	91	0	0	0	0	0	0	0	0	0	0	0	0	0	0	0	42	133	Bacteria{superkingdom}(100);Proteobacteria{phylum}(100);Alphaproteobacteria{class}(100);Rhizobiales{order}(100);Rhodobiaceae{family}(100);Unassigned{genus}(0);Unassigned{species}(0)	Bacteria	Proteobacteria	Alphaproteobacteria	Rhizobiales	Rhodobiaceae	Unassigned	Unassigned
ASV754	65	0	40	32	229	88	0	0	12	7	0	0	0	15	4	0	24	516	Bacteria{superkingdom}(98);Proteobacteria{phylum}(98);Alphaproteobacteria{class}(98);Rhizobiales{order}(98);Phyllobacteriaceae{family}(98);Mesorhizobium{genus}(98);Unassigned{species}(0)	Bacteria	Proteobacteria	Alphaproteobacteria	Rhizobiales	Phyllobacteriaceae	Mesorhizobium	Unassigned
ASV755	401	99	70	311	2826	156	0	0	0	0	0	0	0	0	0	0	59	3922	Bacteria{superkingdom}(100);Verrucomicrobia{phylum}(100);Opitutae{class}(100);Opitutales{order}(100);Opitutaceae{family}(100);Opitutus{genus}(100);Unassigned{species}(0)	Bacteria	Verrucomicrobia	Opitutae	Opitutales	Opitutaceae	Opitutus	Unassigned
ASV756	87	0	39	0	175	110	33	0	45	0	0	0	0	21	0	310	0	820	Bacteria{superkingdom}(100);Actinobacteria{phylum}(100);Actinobacteria{class}(100);Actinomycetales{order}(100);Nocardioidaceae{family}(100);Nocardioides{genus}(100);Unassigned{species}(0)	Bacteria	Actinobacteria	Actinobacteria	Actinomycetales	Nocardioidaceae	Nocardioides	Unassigned
ASV757	68	0	15	51	0	38	23	97	85	87	12	31	31	54	51	122	76	841	Bacteria{superkingdom}(86);Chloroflexi{phylum}(86);Thermomicrobia{class}(86);Sphaerobacterales{order}(86);Sphaerobacteraceae{family}(86);{genus}(86);Unassigned{species}(0)	Bacteria	Chloroflexi	Thermomicrobia	Sphaerobacterales	Sphaerobacteraceae		Unassigned
ASV758	136	0	0	182	115	729	0	0	34	0	0	0	0	0	0	0	0	1196	Bacteria{superkingdom}(92);Proteobacteria{phylum}(92);Oligoflexia{class}(92);Oligoflexales{order}(92);Oligoflexaceae{family}(92);Oligoflexus{genus}(92);uncultured_bacterium{species}(92)	Bacteria	Proteobacteria	Oligoflexia	Oligoflexales	Oligoflexaceae	Oligoflexus	uncultured_bacterium
ASV760	57	79	9	22	8	27	19	6	23	30	32	39	0	6	0	20	0	377	Bacteria{superkingdom}(100);Planctomycetes{phylum}(100);Planctomycetia{class}(100);Planctomycetales{order}(100);Planctomycetaceae{family}(100);{genus}(100);uncultured_Blastopirellula_sp.{species}(100)	Bacteria	Planctomycetes	Planctomycetia	Planctomycetales	Planctomycetaceae		uncultured_Blastopirellula_sp.
ASV761	86	31	47	0	71	56	66	88	53	58	9	62	42	0	0	0	15	684	Bacteria{superkingdom}(100);Proteobacteria{phylum}(100);Alphaproteobacteria{class}(100);Rhizobiales{order}(100);Hyphomicrobiaceae{family}(100);Pedomicrobium{genus}(100);Unassigned{species}(0)	Bacteria	Proteobacteria	Alphaproteobacteria	Rhizobiales	Hyphomicrobiaceae	Pedomicrobium	Unassigned
ASV762	0	0	0	0	245	12	0	0	0	0	0	0	0	0	7	4	0	268	Bacteria{superkingdom}(100);Proteobacteria{phylum}(100);Alphaproteobacteria{class}(100);Sphingomonadales{order}(100);Sphingomonadaceae{family}(100);Sphingopyxis{genus}(100);Unassigned{species}(0)	Bacteria	Proteobacteria	Alphaproteobacteria	Sphingomonadales	Sphingomonadaceae	Sphingopyxis	Unassigned
ASV763	55	0	28	30	64	39	76	91	83	67	32	53	45	70	86	39	34	892	Bacteria{superkingdom}(99);Actinobacteria{phylum}(99);Actinobacteria{class}(99);Gaiellales{order}(99);Gaiellaceae{family}(99);Gaiella{genus}(99);uncultured_Actinomycetales_bacterium{species}(99)	Bacteria	Actinobacteria	Actinobacteria	Gaiellales	Gaiellaceae	Gaiella	uncultured_Actinomycetales_bacterium
ASV764	0	0	0	14	0	12	0	0	0	0	24	31	14	72	68	83	35	353	Bacteria{superkingdom}(86);Verrucomicrobia{phylum}(86);Opitutae{class}(86);Opitutales{order}(86);Opitutaceae{family}(86);Opitutus{genus}(86);uncultured_Opitutaceae_bacterium{species}(86)	Bacteria	Verrucomicrobia	Opitutae	Opitutales	Opitutaceae	Opitutus	uncultured_Opitutaceae_bacterium
ASV765	7	0	0	0	6	8	0	0	0	0	0	0	0	0	0	0	0	21	Bacteria{superkingdom}(97);Chloroflexi{phylum}(97);Anaerolineae{class}(97);Anaerolineales{order}(97);Anaerolineaceae{family}(97);{genus}(97);Unassigned{species}(0)	Bacteria	Chloroflexi	Anaerolineae	Anaerolineales	Anaerolineaceae		Unassigned
ASV768	47	0	35	54	140	115	0	0	20	0	0	0	0	0	0	0	11	422	Bacteria{superkingdom}(82);Bacteroidetes{phylum}(82);Sphingobacteriia{class}(82);Sphingobacteriales{order}(82);Chitinophagaceae{family}(82);{genus}(82);uncultured_Chitinophagaceae_bacterium{species}(82)	Bacteria	Bacteroidetes	Sphingobacteriia	Sphingobacteriales	Chitinophagaceae		uncultured_Chitinophagaceae_bacterium
ASV769	0	0	0	21	0	0	0	0	0	0	0	57	0	17	9	3	5	112	Bacteria{superkingdom}(99);Proteobacteria{phylum}(99);Alphaproteobacteria{class}(99);Rhodospirillales{order}(99);{family}(99);{genus}(99);Unassigned{species}(0)	Bacteria	Proteobacteria	Alphaproteobacteria	Rhodospirillales			Unassigned
ASV770	33	34	40	59	128	71	0	0	0	0	0	0	0	0	0	0	0	365	Bacteria{superkingdom}(90);Planctomycetes{phylum}(90);Planctomycetia{class}(90);Planctomycetales{order}(90);Planctomycetaceae{family}(90);Pirellula{genus}(90);uncultured_Pirellula_sp.{species}(90)	Bacteria	Planctomycetes	Planctomycetia	Planctomycetales	Planctomycetaceae	Pirellula	uncultured_Pirellula_sp.
ASV771	0	0	27	12	93	64	0	0	0	0	0	0	0	15	0	4	0	215	Bacteria{superkingdom}(90);Armatimonadetes{phylum}(90);{class}(90);{order}(90);{family}(90);Armatimonadetes_gp5{genus}(90);uncultured_actinobacterium{species}(90)	Bacteria	Armatimonadetes				Armatimonadetes_gp5	uncultured_actinobacterium
ASV772	10	27	0	59	14	12	9	8	38	93	42	43	18	102	201	90	18	784	Bacteria{superkingdom}(88);Chloroflexi{phylum}(88);Chloroflexia{class}(88);Kallotenuales{order}(88);Kallotenuaceae{family}(88);Kallotenue{genus}(88);uncultured_soil_bacterium{species}(88)	Bacteria	Chloroflexi	Chloroflexia	Kallotenuales	Kallotenuaceae	Kallotenue	uncultured_soil_bacterium
ASV773	37	0	0	29	216	53	0	0	0	0	0	11	26	18	1	0	0	391	Bacteria{superkingdom}(100);Proteobacteria{phylum}(100);Alphaproteobacteria{class}(100);Rhizobiales{order}(100);Hyphomicrobiaceae{family}(100);Devosia{genus}(100);Unassigned{species}(0)	Bacteria	Proteobacteria	Alphaproteobacteria	Rhizobiales	Hyphomicrobiaceae	Devosia	Unassigned
ASV774	0	31	0	0	0	0	0	0	0	0	0	0	0	53	32	0	0	116	Bacteria{superkingdom}(100);Bacteroidetes{phylum}(100);Cytophagia{class}(100);Cytophagales{order}(100);{family}(100);Ohtaekwangia{genus}(100);Unassigned{species}(0)	Bacteria	Bacteroidetes	Cytophagia	Cytophagales		Ohtaekwangia	Unassigned
ASV775	0	0	0	0	0	0	10	0	34	0	0	0	0	0	0	0	0	44	Bacteria{superkingdom}(94);Proteobacteria{phylum}(94);Gammaproteobacteria{class}(94);{order}(94);{family}(94);{genus}(94);uncultured_Steroidobacter_sp.{species}(94)	Bacteria	Proteobacteria	Gammaproteobacteria				uncultured_Steroidobacter_sp.
ASV776	39	67	20	27	36	43	34	41	27	29	20	18	21	33	0	41	22	518	Bacteria{superkingdom}(100);Proteobacteria{phylum}(100);Gammaproteobacteria{class}(100);Enterobacteriales{order}(100);Enterobacteriaceae{family}(100);Escherichia/Shigella{genus}(100);Unassigned{species}(0)	Bacteria	Proteobacteria	Gammaproteobacteria	Enterobacteriales	Enterobacteriaceae	Escherichia/Shigella	Unassigned
ASV777	0	0	0	0	0	0	0	0	0	0	0	28	0	64	30	93	7	222	Bacteria{superkingdom}(100);Proteobacteria{phylum}(100);Alphaproteobacteria{class}(100);Rhodospirillales{order}(100);Rhodospirillaceae{family}(100);Skermanella{genus}(100);Unassigned{species}(0)	Bacteria	Proteobacteria	Alphaproteobacteria	Rhodospirillales	Rhodospirillaceae	Skermanella	Unassigned
ASV778	0	0	0	0	158	0	0	0	0	0	20	0	0	0	0	0	0	178	Bacteria{superkingdom}(99);Proteobacteria{phylum}(99);Gammaproteobacteria{class}(99);Pseudomonadales{order}(99);Pseudomonadaceae{family}(99);Pseudomonas{genus}(99);Unassigned{species}(0)	Bacteria	Proteobacteria	Gammaproteobacteria	Pseudomonadales	Pseudomonadaceae	Pseudomonas	Unassigned
ASV779	51	0	26	22	81	40	47	83	77	59	117	33	108	58	0	15	87	904	Bacteria{superkingdom}(94);Acidobacteria{phylum}(94);Acidobacteria_Gp3{class}(94);{order}(94);{family}(94);{genus}(94);uncultured_Candidatus_Solibacter_sp.{species}(94)	Bacteria	Acidobacteria	Acidobacteria_Gp3				uncultured_Candidatus_Solibacter_sp.
ASV780	0	0	53	0	64	20	104	0	40	0	12	28	0	0	0	0	0	321	Bacteria{superkingdom}(100);Chloroflexi{phylum}(100);Chloroflexia{class}(100);{order}(100);{family}(100);{genus}(100);Unassigned{species}(0)	Bacteria	Chloroflexi	Chloroflexia				Unassigned
ASV781	144	0	0	0	3684	0	0	0	0	26	0	7	0	0	0	0	0	3861	Bacteria{superkingdom}(96);Bacteroidetes{phylum}(96);Sphingobacteriia{class}(96);Sphingobacteriales{order}(96);Chitinophagaceae{family}(96);Taibaiella{genus}(96);uncultured_bacterium{species}(96)	Bacteria	Bacteroidetes	Sphingobacteriia	Sphingobacteriales	Chitinophagaceae	Taibaiella	uncultured_bacterium
ASV782	20	61	0	0	105	3	105	11	631	30	0	18	0	8	0	0	0	992	Bacteria{superkingdom}(100);Chloroflexi{phylum}(100);Chloroflexia{class}(100);Chloroflexales{order}(100);Oscillochloridaceae{family}(100);Oscillochloris{genus}(100);uncultured_bacterium{species}(100)	Bacteria	Chloroflexi	Chloroflexia	Chloroflexales	Oscillochloridaceae	Oscillochloris	uncultured_bacterium
ASV783	93	72	99	0	153	92	14	0	9	0	0	0	0	0	0	0	0	532	Bacteria{superkingdom}(84);Bacteroidetes{phylum}(84);Sphingobacteriia{class}(84);Sphingobacteriales{order}(84);Chitinophagaceae{family}(84);Cnuella{genus}(84);uncultured_Chitinophaga_sp.{species}(84)	Bacteria	Bacteroidetes	Sphingobacteriia	Sphingobacteriales	Chitinophagaceae	Cnuella	uncultured_Chitinophaga_sp.
ASV784	40	0	0	30	0	49	186	279	80	45	256	8	224	22	0	0	75	1294	Bacteria{superkingdom}(94);{phylum}(94);{class}(94);{order}(94);{family}(94);{genus}(94);uncultured_candidate_division_SPAM_bacterium{species}(94)	Bacteria						uncultured_candidate_division_SPAM_bacterium
ASV785	0	0	0	0	6	0	0	0	0	0	0	0	0	0	0	0	0	6	Bacteria{superkingdom}(94);Cyanobacteria/Chloroplast{phylum}(94);Cyanobacteria{class}(94);{order}(94);{family}(94);{genus}(94);Unassigned{species}(0)	Bacteria	Cyanobacteria/Chloroplast	Cyanobacteria				Unassigned
ASV786	68	13	0	0	2082	16	0	0	7	6	0	0	32	0	2	0	4	2230	Bacteria{superkingdom}(92);Bacteroidetes{phylum}(92);Flavobacteriia{class}(92);Flavobacteriales{order}(92);Cryomorphaceae{family}(92);{genus}(92);Unassigned{species}(0)	Bacteria	Bacteroidetes	Flavobacteriia	Flavobacteriales	Cryomorphaceae		Unassigned
ASV788	62	0	0	8	43	0	0	0	0	0	0	0	0	0	0	0	0	113	Bacteria{superkingdom}(84);Chloroflexi{phylum}(84);Chloroflexia{class}(84);Kallotenuales{order}(84);Kallotenuaceae{family}(84);Kallotenue{genus}(84);uncultured_bacterium{species}(84)	Bacteria	Chloroflexi	Chloroflexia	Kallotenuales	Kallotenuaceae	Kallotenue	uncultured_bacterium
ASV789	0	0	0	23	0	110	0	0	0	0	0	0	0	0	0	0	0	133	Bacteria{superkingdom}(100);Acidobacteria{phylum}(100);Acidobacteria_Gp7{class}(100);{order}(100);{family}(100);Gp7{genus}(100);Unassigned{species}(0)	Bacteria	Acidobacteria	Acidobacteria_Gp7			Gp7	Unassigned
ASV790	48	0	264	147	0	146	0	0	0	0	30	0	0	0	0	0	0	635	Bacteria{superkingdom}(100);Bacteroidetes{phylum}(100);Cytophagia{class}(100);Cytophagales{order}(100);{family}(100);Ohtaekwangia{genus}(100);Unassigned{species}(0)	Bacteria	Bacteroidetes	Cytophagia	Cytophagales		Ohtaekwangia	Unassigned
ASV791	79	0	41	57	100	50	71	30	0	77	120	0	40	54	0	33	0	752	Bacteria{superkingdom}(80);Acidobacteria{phylum}(80);{class}(80);{order}(80);{family}(80);{genus}(80);uncultured_microorganism{species}(80)	Bacteria	Acidobacteria					uncultured_microorganism
ASV792	0	0	0	16	0	1	0	0	0	0	0	26	0	63	0	0	0	106	Bacteria{superkingdom}(98);Actinobacteria{phylum}(98);Actinobacteria{class}(98);Solirubrobacterales{order}(98);Conexibacteraceae{family}(98);Conexibacter{genus}(98);uncultured_Rubrobacteraceae_bacterium{species}(98)	Bacteria	Actinobacteria	Actinobacteria	Solirubrobacterales	Conexibacteraceae	Conexibacter	uncultured_Rubrobacteraceae_bacterium
ASV793	72	0	45	74	165	114	0	0	0	0	0	0	0	0	0	0	7	477	Bacteria{superkingdom}(88);Proteobacteria{phylum}(88);Alphaproteobacteria{class}(88);Rhizobiales{order}(88);Hyphomicrobiaceae{family}(88);Blastochloris{genus}(88);uncultured_alpha_proteobacterium{species}(88)	Bacteria	Proteobacteria	Alphaproteobacteria	Rhizobiales	Hyphomicrobiaceae	Blastochloris	uncultured_alpha_proteobacterium
ASV794	27	0	0	57	0	0	0	35	0	38	0	32	0	0	15	0	0	204	Bacteria{superkingdom}(100);Bacteroidetes{phylum}(100);Sphingobacteriia{class}(100);Sphingobacteriales{order}(100);Chitinophagaceae{family}(100);Niastella{genus}(100);Unassigned{species}(0)	Bacteria	Bacteroidetes	Sphingobacteriia	Sphingobacteriales	Chitinophagaceae	Niastella	Unassigned
ASV795	127	138	0	0	0	162	0	0	0	0	0	0	0	0	0	0	0	427	Bacteria{superkingdom}(100);Actinobacteria{phylum}(100);Actinobacteria{class}(100);Actinomycetales{order}(100);Nocardioidaceae{family}(100);Nocardioides{genus}(100);Unassigned{species}(0)	Bacteria	Actinobacteria	Actinobacteria	Actinomycetales	Nocardioidaceae	Nocardioides	Unassigned
ASV796	81	0	48	44	27	63	1	0	0	0	0	0	29	0	0	0	0	293	Bacteria{superkingdom}(100);Acidobacteria{phylum}(100);Acidobacteria_Gp6{class}(100);{order}(100);{family}(100);Gp6{genus}(100);Unassigned{species}(0)	Bacteria	Acidobacteria	Acidobacteria_Gp6			Gp6	Unassigned
ASV797	77	0	35	83	98	97	0	0	16	0	0	0	11	26	72	44	39	598	Bacteria{superkingdom}(81);Proteobacteria{phylum}(81);Alphaproteobacteria{class}(81);Sphingomonadales{order}(81);Sphingomonadaceae{family}(81);Novosphingobium{genus}(81);Unassigned{species}(0)	Bacteria	Proteobacteria	Alphaproteobacteria	Sphingomonadales	Sphingomonadaceae	Novosphingobium	Unassigned
ASV798	19	19	0	14	0	0	0	24	18	27	0	16	27	34	143	56	9	406	Bacteria{superkingdom}(97);Acidobacteria{phylum}(97);{class}(97);{order}(97);{family}(97);{genus}(97);uncultured_Acidobacteriales_bacterium{species}(97)	Bacteria	Acidobacteria					uncultured_Acidobacteriales_bacterium
ASV799	58	26	27	0	45	0	0	0	0	0	0	18	0	38	11	28	0	251	Bacteria{superkingdom}(100);Actinobacteria{phylum}(100);Actinobacteria{class}(100);Actinomycetales{order}(100);Nocardioidaceae{family}(100);Nocardioides{genus}(100);Unassigned{species}(0)	Bacteria	Actinobacteria	Actinobacteria	Actinomycetales	Nocardioidaceae	Nocardioides	Unassigned
ASV800	76	13	24	103	115	32	5	5	5	0	7	0	17	9	13	0	0	424	Bacteria{superkingdom}(82);Actinobacteria{phylum}(82);Actinobacteria{class}(82);Actinomycetales{order}(82);Microbacteriaceae{family}(82);Lysinimonas{genus}(82);uncultured_Microbacteriaceae_bacterium{species}(82)	Bacteria	Actinobacteria	Actinobacteria	Actinomycetales	Microbacteriaceae	Lysinimonas	uncultured_Microbacteriaceae_bacterium
ASV801	23	0	0	0	0	60	0	0	0	0	0	0	0	0	0	0	0	83	Bacteria{superkingdom}(100);Acidobacteria{phylum}(100);Acidobacteria_Gp7{class}(100);{order}(100);{family}(100);Gp7{genus}(100);Unassigned{species}(0)	Bacteria	Acidobacteria	Acidobacteria_Gp7			Gp7	Unassigned
ASV802	0	63	0	0	0	0	0	0	0	0	0	98	84	71	119	141	48	624	Bacteria{superkingdom}(89);Proteobacteria{phylum}(89);Alphaproteobacteria{class}(89);Rhizobiales{order}(89);Methylobacteriaceae{family}(89);Microvirga{genus}(89);Unassigned{species}(0)	Bacteria	Proteobacteria	Alphaproteobacteria	Rhizobiales	Methylobacteriaceae	Microvirga	Unassigned
ASV803	20	0	37	113	27	170	195	21	9	0	116	23	216	16	0	31	68	1062	Bacteria{superkingdom}(93);Acidobacteria{phylum}(93);Acidobacteria_Gp6{class}(93);{order}(93);{family}(93);Gp6{genus}(93);Unassigned{species}(0)	Bacteria	Acidobacteria	Acidobacteria_Gp6			Gp6	Unassigned
ASV804	0	417	0	0	0	0	0	0	0	84	0	23	0	0	0	0	0	524	Bacteria{superkingdom}(100);Acidobacteria{phylum}(100);Acidobacteria_Gp4{class}(100);{order}(100);{family}(100);Gp4{genus}(100);Unassigned{species}(0)	Bacteria	Acidobacteria	Acidobacteria_Gp4			Gp4	Unassigned
ASV805	0	0	0	5	0	77	0	0	0	0	11	1	0	0	15	0	0	109	Bacteria{superkingdom}(100);Verrucomicrobia{phylum}(100);Opitutae{class}(100);Opitutales{order}(100);Opitutaceae{family}(100);Opitutus{genus}(100);Unassigned{species}(0)	Bacteria	Verrucomicrobia	Opitutae	Opitutales	Opitutaceae	Opitutus	Unassigned
ASV806	0	0	0	0	0	296	0	0	0	0	0	0	0	0	0	0	0	296	Bacteria{superkingdom}(82);Bacteroidetes{phylum}(82);Sphingobacteriia{class}(82);Sphingobacteriales{order}(82);Chitinophagaceae{family}(82);Chitinophaga{genus}(82);uncultured_bacterium{species}(82)	Bacteria	Bacteroidetes	Sphingobacteriia	Sphingobacteriales	Chitinophagaceae	Chitinophaga	uncultured_bacterium
ASV807	44	26	74	0	45	90	31	57	12	10	17	11	43	0	26	0	131	617	Bacteria{superkingdom}(95);Chloroflexi{phylum}(95);{class}(95);{order}(95);{family}(95);{genus}(95);Unassigned{species}(0)	Bacteria	Chloroflexi					Unassigned
ASV808	62	0	17	0	52	0	0	118	31	71	0	48	0	0	0	0	0	399	Bacteria{superkingdom}(98);Proteobacteria{phylum}(98);Alphaproteobacteria{class}(98);Rhizobiales{order}(98);Rhodobiaceae{family}(98);Methyloceanibacter{genus}(98);Unassigned{species}(0)	Bacteria	Proteobacteria	Alphaproteobacteria	Rhizobiales	Rhodobiaceae	Methyloceanibacter	Unassigned
ASV809	136	0	28	0	383	118	0	0	0	0	0	0	0	0	0	0	0	665	Bacteria{superkingdom}(86);Planctomycetes{phylum}(86);Phycisphaerae{class}(86);Phycisphaerales{order}(86);Phycisphaeraceae{family}(86);Phycisphaera{genus}(86);uncultured_bacterium{species}(86)	Bacteria	Planctomycetes	Phycisphaerae	Phycisphaerales	Phycisphaeraceae	Phycisphaera	uncultured_bacterium
ASV810	61	0	55	58	135	0	0	0	0	0	48	0	0	0	0	0	0	357	Bacteria{superkingdom}(98);Firmicutes{phylum}(98);Bacilli{class}(98);Bacillales{order}(98);Paenibacillaceae_1{family}(98);Paenibacillus{genus}(98);Unassigned{species}(0)	Bacteria	Firmicutes	Bacilli	Bacillales	Paenibacillaceae_1	Paenibacillus	Unassigned
ASV811	0	0	51	0	25	0	0	0	405	282	0	43	0	0	64	0	0	870	Bacteria{superkingdom}(100);Bacteroidetes{phylum}(100);Sphingobacteriia{class}(100);Sphingobacteriales{order}(100);Chitinophagaceae{family}(100);Unassigned{genus}(0);Unassigned{species}(0)	Bacteria	Bacteroidetes	Sphingobacteriia	Sphingobacteriales	Chitinophagaceae	Unassigned	Unassigned
ASV812	0	0	29	0	0	0	0	0	5	0	2	0	0	0	0	3	0	39	Bacteria{superkingdom}(83);Candidatus_Saccharibacteria{phylum}(83);{class}(83);{order}(83);{family}(83);Saccharibacteria_genera_incertae_sedis{genus}(83);uncultured_bacterium{species}(83)	Bacteria	Candidatus_Saccharibacteria				Saccharibacteria_genera_incertae_sedis	uncultured_bacterium
ASV813	10	11	14	0	0	0	218	171	118	120	59	90	173	27	85	0	60	1156	Bacteria{superkingdom}(100);Unassigned{phylum}(0);Unassigned{class}(0);Unassigned{order}(0);Unassigned{family}(0);Unassigned{genus}(0);Unassigned{species}(0)	Bacteria	Unassigned	Unassigned	Unassigned	Unassigned	Unassigned	Unassigned
ASV814	31	0	0	0	0	153	0	0	0	0	0	0	0	0	0	0	0	184	Bacteria{superkingdom}(80);Proteobacteria{phylum}(80);Alphaproteobacteria{class}(80);Rhizobiales{order}(80);Hyphomicrobiaceae{family}(80);Unassigned{genus}(0);Unassigned{species}(0)	Bacteria	Proteobacteria	Alphaproteobacteria	Rhizobiales	Hyphomicrobiaceae	Unassigned	Unassigned
ASV815	83	140	26	27	67	49	46	21	28	31	30	8	47	18	0	8	21	650	Bacteria{superkingdom}(92);Proteobacteria{phylum}(92);Gammaproteobacteria{class}(92);Chromatiales{order}(92);Unassigned{family}(0);Unassigned{genus}(0);Unassigned{species}(0)	Bacteria	Proteobacteria	Gammaproteobacteria	Chromatiales	Unassigned	Unassigned	Unassigned
ASV816	16	19	3	0	0	0	20	31	28	74	58	48	244	139	42	82	197	1001	Bacteria{superkingdom}(99);Acidobacteria{phylum}(99);Acidobacteria_Gp16{class}(99);{order}(99);{family}(99);Gp16{genus}(99);Unassigned{species}(0)	Bacteria	Acidobacteria	Acidobacteria_Gp16			Gp16	Unassigned
ASV818	8	0	0	0	0	0	44	0	0	0	0	0	0	0	0	0	0	52	Bacteria{superkingdom}(88);Chloroflexi{phylum}(88);Anaerolineae{class}(88);Anaerolineales{order}(88);Anaerolineaceae{family}(88);{genus}(88);Unassigned{species}(0)	Bacteria	Chloroflexi	Anaerolineae	Anaerolineales	Anaerolineaceae		Unassigned
ASV819	180	16	129	0	143	108	0	0	0	0	0	0	0	0	0	0	0	576	Bacteria{superkingdom}(100);Proteobacteria{phylum}(100);Betaproteobacteria{class}(100);Burkholderiales{order}(100);Burkholderiaceae{family}(100);Cupriavidus{genus}(100);Unassigned{species}(0)	Bacteria	Proteobacteria	Betaproteobacteria	Burkholderiales	Burkholderiaceae	Cupriavidus	Unassigned
ASV820	35	46	18	17	38	17	53	22	51	36	93	20	49	38	31	18	0	582	Bacteria{superkingdom}(100);Proteobacteria{phylum}(100);Betaproteobacteria{class}(100);Burkholderiales{order}(100);Burkholderiaceae{family}(100);Ralstonia{genus}(100);Unassigned{species}(0)	Bacteria	Proteobacteria	Betaproteobacteria	Burkholderiales	Burkholderiaceae	Ralstonia	Unassigned
ASV821	14	19	0	18	0	0	0	0	0	41	24	61	0	25	0	39	0	241	Bacteria{superkingdom}(97);Actinobacteria{phylum}(97);Actinobacteria{class}(97);Actinomycetales{order}(97);Mycobacteriaceae{family}(97);Mycobacterium{genus}(97);Unassigned{species}(0)	Bacteria	Actinobacteria	Actinobacteria	Actinomycetales	Mycobacteriaceae	Mycobacterium	Unassigned
ASV822	0	191	0	0	0	38	0	12	0	19	29	20	0	0	0	20	4	333	Bacteria{superkingdom}(100);Unassigned{phylum}(0);Unassigned{class}(0);Unassigned{order}(0);Unassigned{family}(0);Unassigned{genus}(0);Unassigned{species}(0)	Bacteria	Unassigned	Unassigned	Unassigned	Unassigned	Unassigned	Unassigned
ASV823	117	46	0	0	50	0	0	0	0	0	0	0	0	0	0	47	0	260	Bacteria{superkingdom}(92);Actinobacteria{phylum}(92);Actinobacteria{class}(92);Actinomycetales{order}(92);Nocardioidaceae{family}(92);Nocardioides{genus}(92);uncultured_Actinomyces_sp.{species}(92)	Bacteria	Actinobacteria	Actinobacteria	Actinomycetales	Nocardioidaceae	Nocardioides	uncultured_Actinomyces_sp.
ASV824	0	74	0	0	0	0	0	0	25	167	0	0	0	0	0	0	0	266	Bacteria{superkingdom}(97);Chloroflexi{phylum}(97);Chloroflexia{class}(97);{order}(97);{family}(97);{genus}(97);uncultured_bacterium{species}(97)	Bacteria	Chloroflexi	Chloroflexia				uncultured_bacterium
ASV825	54	180	0	0	69	0	42	276	167	65	0	43	0	0	0	0	0	896	Bacteria{superkingdom}(99);Chloroflexi{phylum}(99);Caldilineae{class}(99);Caldilineales{order}(99);Caldilineaceae{family}(99);Litorilinea{genus}(99);uncultured_Litorilinea_sp.{species}(99)	Bacteria	Chloroflexi	Caldilineae	Caldilineales	Caldilineaceae	Litorilinea	uncultured_Litorilinea_sp.
ASV826	0	22	14	16	0	27	0	0	12	11	20	0	0	60	47	19	0	248	Bacteria{superkingdom}(100);Actinobacteria{phylum}(100);Actinobacteria{class}(100);Actinomycetales{order}(100);Microbacteriaceae{family}(100);Unassigned{genus}(0);Unassigned{species}(0)	Bacteria	Actinobacteria	Actinobacteria	Actinomycetales	Microbacteriaceae	Unassigned	Unassigned
ASV828	66	0	39	39	0	180	0	0	0	20	0	0	0	0	0	303	288	935	Bacteria{superkingdom}(95);Acidobacteria{phylum}(95);Acidobacteria_Gp16{class}(95);{order}(95);{family}(95);Gp16{genus}(95);uncultured_Chloroflexi_bacterium{species}(95)	Bacteria	Acidobacteria	Acidobacteria_Gp16			Gp16	uncultured_Chloroflexi_bacterium
ASV830	0	17	0	0	0	0	0	0	0	0	0	0	0	0	0	0	0	17	Bacteria{superkingdom}(100);Bacteroidetes{phylum}(100);Cytophagia{class}(100);Cytophagales{order}(100);Cytophagaceae{family}(100);Adhaeribacter{genus}(100);Unassigned{species}(0)	Bacteria	Bacteroidetes	Cytophagia	Cytophagales	Cytophagaceae	Adhaeribacter	Unassigned
ASV831	0	0	0	0	0	0	0	0	0	42	0	20	0	18	0	16	0	96	Bacteria{superkingdom}(100);Proteobacteria{phylum}(100);Gammaproteobacteria{class}(100);Xanthomonadales{order}(100);Sinobacteraceae{family}(100);Unassigned{genus}(0);Unassigned{species}(0)	Bacteria	Proteobacteria	Gammaproteobacteria	Xanthomonadales	Sinobacteraceae	Unassigned	Unassigned
ASV832	25	0	20	40	0	65	8	0	0	0	0	0	0	0	0	0	0	158	Bacteria{superkingdom}(100);candidate_division_WPS-1{phylum}(100);{class}(100);{order}(100);{family}(100);WPS-1_genera_incertae_sedis{genus}(100);Unassigned{species}(0)	Bacteria	candidate_division_WPS-1				WPS-1_genera_incertae_sedis	Unassigned
ASV833	72	0	10	79	86	134	0	0	0	0	0	0	65	0	0	36	21	503	Bacteria{superkingdom}(100);Proteobacteria{phylum}(100);Deltaproteobacteria{class}(100);Myxococcales{order}(100);{family}(100);{genus}(100);Unassigned{species}(0)	Bacteria	Proteobacteria	Deltaproteobacteria	Myxococcales			Unassigned
ASV834	69	46	9	16	57	15	26	6	0	0	0	22	0	0	0	0	0	266	Bacteria{superkingdom}(100);Actinobacteria{phylum}(100);Actinobacteria{class}(100);Actinomycetales{order}(100);Micromonosporaceae{family}(100);Unassigned{genus}(0);Unassigned{species}(0)	Bacteria	Actinobacteria	Actinobacteria	Actinomycetales	Micromonosporaceae	Unassigned	Unassigned
ASV835	55	0	31	24	69	78	0	8	0	19	0	0	28	0	7	10	12	341	Bacteria{superkingdom}(100);Proteobacteria{phylum}(100);Alphaproteobacteria{class}(100);Rhodospirillales{order}(100);{family}(100);{genus}(100);Unassigned{species}(0)	Bacteria	Proteobacteria	Alphaproteobacteria	Rhodospirillales			Unassigned
ASV836	43	0	0	0	0	186	21	0	0	0	0	0	0	0	0	0	0	250	Bacteria{superkingdom}(91);Proteobacteria{phylum}(91);Gammaproteobacteria{class}(91);Xanthomonadales{order}(91);Sinobacteraceae{family}(91);Steroidobacter{genus}(91);Unassigned{species}(0)	Bacteria	Proteobacteria	Gammaproteobacteria	Xanthomonadales	Sinobacteraceae	Steroidobacter	Unassigned
ASV837	0	42	0	0	0	0	14	0	0	0	30	42	0	0	0	0	0	128	Bacteria{superkingdom}(84);Planctomycetes{phylum}(84);Planctomycetia{class}(84);Planctomycetales{order}(84);Planctomycetaceae{family}(84);{genus}(84);Unassigned{species}(0)	Bacteria	Planctomycetes	Planctomycetia	Planctomycetales	Planctomycetaceae		Unassigned
ASV838	0	0	0	0	0	0	0	0	0	80	0	183	0	25	15	6	0	309	Bacteria{superkingdom}(100);Acidobacteria{phylum}(100);Acidobacteria_Gp4{class}(100);{order}(100);{family}(100);Gp4{genus}(100);Unassigned{species}(0)	Bacteria	Acidobacteria	Acidobacteria_Gp4			Gp4	Unassigned
ASV840	0	0	0	0	0	67	19	0	0	0	0	0	0	0	0	0	0	86	Bacteria{superkingdom}(82);{phylum}(82);{class}(82);{order}(82);{family}(82);{genus}(82);uncultured_Candidatus_Entotheonella_sp.{species}(82)	Bacteria						uncultured_Candidatus_Entotheonella_sp.
ASV841	101	0	47	26	183	39	30	29	23	56	44	48	16	35	29	27	53	786	Bacteria{superkingdom}(100);candidate_division_WPS-1{phylum}(100);{class}(100);{order}(100);{family}(100);WPS-1_genera_incertae_sedis{genus}(100);Unassigned{species}(0)	Bacteria	candidate_division_WPS-1				WPS-1_genera_incertae_sedis	Unassigned
ASV842	95	0	21	24	48	220	0	0	0	0	0	0	0	0	0	0	0	408	Bacteria{superkingdom}(98);Proteobacteria{phylum}(98);Deltaproteobacteria{class}(98);Myxococcales{order}(98);Nannocystaceae{family}(98);{genus}(98);uncultured_bacterium{species}(98)	Bacteria	Proteobacteria	Deltaproteobacteria	Myxococcales	Nannocystaceae		uncultured_bacterium
ASV843	50	0	88	82	760	54	0	0	0	8	0	0	41	0	7	0	0	1090	Bacteria{superkingdom}(99);Chloroflexi{phylum}(99);Anaerolineae{class}(99);Anaerolineales{order}(99);Anaerolineaceae{family}(99);{genus}(99);Unassigned{species}(0)	Bacteria	Chloroflexi	Anaerolineae	Anaerolineales	Anaerolineaceae		Unassigned
ASV844	10	112	20	15	45	32	0	0	0	42	0	0	0	41	0	0	0	317	Bacteria{superkingdom}(88);Actinobacteria{phylum}(88);Actinobacteria{class}(88);Actinomycetales{order}(88);Pseudonocardiaceae{family}(88);Actinophytocola{genus}(88);uncultured_bacterium{species}(88)	Bacteria	Actinobacteria	Actinobacteria	Actinomycetales	Pseudonocardiaceae	Actinophytocola	uncultured_bacterium
ASV845	0	7	0	0	0	0	0	0	0	0	0	7	0	0	0	0	0	14	Bacteria{superkingdom}(100);Armatimonadetes{phylum}(100);Armatimonadia{class}(100);Armatimonadales{order}(100);Armatimonadaceae{family}(100);Armatimonas/Armatimonadetes_gp1{genus}(100);Unassigned{species}(0)	Bacteria	Armatimonadetes	Armatimonadia	Armatimonadales	Armatimonadaceae	Armatimonas/Armatimonadetes_gp1	Unassigned
ASV846	0	0	0	0	0	0	0	0	0	0	0	0	0	8	59	31	0	98	Bacteria{superkingdom}(100);Bacteroidetes{phylum}(100);Sphingobacteriia{class}(100);Sphingobacteriales{order}(100);Chitinophagaceae{family}(100);Unassigned{genus}(0);Unassigned{species}(0)	Bacteria	Bacteroidetes	Sphingobacteriia	Sphingobacteriales	Chitinophagaceae	Unassigned	Unassigned
ASV847	0	0	0	0	34	39	0	0	0	0	0	0	0	0	0	0	0	73	Bacteria{superkingdom}(84);Proteobacteria{phylum}(84);Alphaproteobacteria{class}(84);Rhizobiales{order}(84);{family}(84);{genus}(84);uncultured_Methylocystaceae_bacterium{species}(84)	Bacteria	Proteobacteria	Alphaproteobacteria	Rhizobiales			uncultured_Methylocystaceae_bacterium
ASV848	35	0	0	0	0	54	0	0	0	0	0	0	0	0	0	15	0	104	Bacteria{superkingdom}(98);Bacteroidetes{phylum}(98);Cytophagia{class}(98);Cytophagales{order}(98);{family}(98);Chryseolinea{genus}(98);Unassigned{species}(0)	Bacteria	Bacteroidetes	Cytophagia	Cytophagales		Chryseolinea	Unassigned
ASV849	0	0	0	0	497	0	97	0	0	0	0	0	0	0	0	0	0	594	Bacteria{superkingdom}(100);Proteobacteria{phylum}(100);Gammaproteobacteria{class}(100);Xanthomonadales{order}(100);Xanthomonadaceae{family}(100);Unassigned{genus}(0);Unassigned{species}(0)	Bacteria	Proteobacteria	Gammaproteobacteria	Xanthomonadales	Xanthomonadaceae	Unassigned	Unassigned
ASV850	129	0	19	64	769	90	15	0	0	5	0	0	18	0	0	0	0	1109	Bacteria{superkingdom}(99);Proteobacteria{phylum}(99);Gammaproteobacteria{class}(99);Xanthomonadales{order}(99);Xanthomonadaceae{family}(99);{genus}(99);Aquimonas_sp._enrichment_culture_clone_03SUJ1{species}(99)	Bacteria	Proteobacteria	Gammaproteobacteria	Xanthomonadales	Xanthomonadaceae		Aquimonas_sp._enrichment_culture_clone_03SUJ1
ASV851	0	0	0	0	415	0	0	4	0	0	0	28	0	0	0	0	0	447	Bacteria{superkingdom}(100);Proteobacteria{phylum}(100);Gammaproteobacteria{class}(100);Xanthomonadales{order}(100);Xanthomonadaceae{family}(100);Pseudoxanthomonas{genus}(100);Unassigned{species}(0)	Bacteria	Proteobacteria	Gammaproteobacteria	Xanthomonadales	Xanthomonadaceae	Pseudoxanthomonas	Unassigned
ASV852	315	34	515	0	345	105	63	20	11	67	0	0	21	0	0	0	0	1496	Bacteria{superkingdom}(99);Firmicutes{phylum}(99);Bacilli{class}(99);Bacillales{order}(99);Bacillaceae_1{family}(99);Bacillus{genus}(99);Unassigned{species}(0)	Bacteria	Firmicutes	Bacilli	Bacillales	Bacillaceae_1	Bacillus	Unassigned
ASV853	43	0	91	0	0	44	0	0	0	0	0	0	0	0	0	0	0	178	Bacteria{superkingdom}(94);Acidobacteria{phylum}(94);Acidobacteria_Gp10{class}(94);{order}(94);{family}(94);Gp10{genus}(94);uncultured_Firmicutes_bacterium{species}(94)	Bacteria	Acidobacteria	Acidobacteria_Gp10			Gp10	uncultured_Firmicutes_bacterium
ASV854	29	0	0	44	0	0	0	0	19	55	0	19	0	52	17	95	0	330	Bacteria{superkingdom}(95);Acidobacteria{phylum}(95);{class}(95);{order}(95);{family}(95);{genus}(95);uncultured_Geobacter_sp.{species}(95)	Bacteria	Acidobacteria					uncultured_Geobacter_sp.
ASV855	112	0	193	39	0	82	75	0	0	0	0	27	0	0	0	0	0	528	Bacteria{superkingdom}(99);Actinobacteria{phylum}(99);Unassigned{class}(0);Unassigned{order}(0);Unassigned{family}(0);Unassigned{genus}(0);Unassigned{species}(0)	Bacteria	Actinobacteria	Unassigned	Unassigned	Unassigned	Unassigned	Unassigned
ASV856	87	0	21	0	0	56	52	5	56	0	0	15	40	0	0	0	0	332	Bacteria{superkingdom}(96);Planctomycetes{phylum}(96);Planctomycetia{class}(96);Planctomycetales{order}(96);Planctomycetaceae{family}(96);Blastopirellula{genus}(96);uncultured_bacterium{species}(96)	Bacteria	Planctomycetes	Planctomycetia	Planctomycetales	Planctomycetaceae	Blastopirellula	uncultured_bacterium
ASV857	0	159	0	0	0	0	0	9	0	30	0	13	0	0	0	7	0	218	Bacteria{superkingdom}(99);Chloroflexi{phylum}(99);Unassigned{class}(0);Unassigned{order}(0);Unassigned{family}(0);Unassigned{genus}(0);Unassigned{species}(0)	Bacteria	Chloroflexi	Unassigned	Unassigned	Unassigned	Unassigned	Unassigned
ASV858	16	0	30	14	81	0	165	0	0	19	251	0	108	76	113	0	16	889	Bacteria{superkingdom}(95);Actinobacteria{phylum}(95);Actinobacteria{class}(95);Solirubrobacterales{order}(95);{family}(95);{genus}(95);Unassigned{species}(0)	Bacteria	Actinobacteria	Actinobacteria	Solirubrobacterales			Unassigned
ASV859	0	0	0	134	0	94	0	0	0	0	72	19	0	71	0	123	64	577	Bacteria{superkingdom}(99);Chloroflexi{phylum}(99);{class}(99);{order}(99);{family}(99);{genus}(99);uncultured_Anaerolineae_bacterium{species}(99)	Bacteria	Chloroflexi					uncultured_Anaerolineae_bacterium
ASV860	242	34	82	154	253	184	12	11	32	17	18	0	98	0	0	0	42	1179	Bacteria{superkingdom}(87);Proteobacteria{phylum}(87);Deltaproteobacteria{class}(87);Myxococcales{order}(87);Labilitrichaceae{family}(87);Labilithrix{genus}(87);uncultured_delta_proteobacterium{species}(87)	Bacteria	Proteobacteria	Deltaproteobacteria	Myxococcales	Labilitrichaceae	Labilithrix	uncultured_delta_proteobacterium
ASV861	0	0	41	0	100	20	0	0	39	0	0	0	0	0	0	0	0	200	Bacteria{superkingdom}(100);Acidobacteria{phylum}(100);Acidobacteria_Gp10{class}(100);{order}(100);{family}(100);Gp10{genus}(100);Unassigned{species}(0)	Bacteria	Acidobacteria	Acidobacteria_Gp10			Gp10	Unassigned
ASV862	0	121	0	0	0	0	80	25	32	0	53	48	61	0	68	57	39	584	Bacteria{superkingdom}(100);Proteobacteria{phylum}(100);Betaproteobacteria{class}(100);{order}(100);{family}(100);{genus}(100);Unassigned{species}(0)	Bacteria	Proteobacteria	Betaproteobacteria				Unassigned
ASV863	24	236	39	0	0	98	0	0	0	0	0	77	0	95	215	0	0	784	Bacteria{superkingdom}(88);Actinobacteria{phylum}(88);Actinobacteria{class}(88);Actinomycetales{order}(88);Nocardioidaceae{family}(88);Marmoricola{genus}(88);Unassigned{species}(0)	Bacteria	Actinobacteria	Actinobacteria	Actinomycetales	Nocardioidaceae	Marmoricola	Unassigned
ASV864	87	21	78	36	263	118	0	0	0	0	0	13	0	52	13	61	23	765	Bacteria{superkingdom}(96);Actinobacteria{phylum}(96);Actinobacteria{class}(96);Actinomycetales{order}(96);Sporichthyaceae{family}(96);Sporichthya{genus}(96);Sporichthya_polymorpha{species}(96)	Bacteria	Actinobacteria	Actinobacteria	Actinomycetales	Sporichthyaceae	Sporichthya	Sporichthya_polymorpha
ASV866	0	0	0	0	0	28	0	0	0	0	0	0	278	227	24	111	12	680	Bacteria{superkingdom}(100);Actinobacteria{phylum}(100);Actinobacteria{class}(100);Actinomycetales{order}(100);Pseudonocardiaceae{family}(100);Saccharothrix{genus}(100);Unassigned{species}(0)	Bacteria	Actinobacteria	Actinobacteria	Actinomycetales	Pseudonocardiaceae	Saccharothrix	Unassigned
ASV867	40	0	63	0	0	182	0	0	0	0	0	0	0	0	0	0	0	285	Bacteria{superkingdom}(100);Acidobacteria{phylum}(100);Acidobacteria_Gp10{class}(100);{order}(100);{family}(100);Gp10{genus}(100);Unassigned{species}(0)	Bacteria	Acidobacteria	Acidobacteria_Gp10			Gp10	Unassigned
ASV868	0	470	0	0	0	0	122	62	106	0	70	0	0	0	72	0	216	1118	Bacteria{superkingdom}(96);Proteobacteria{phylum}(96);Alphaproteobacteria{class}(96);Rhizobiales{order}(96);Rhodobiaceae{family}(96);{genus}(96);Unassigned{species}(0)	Bacteria	Proteobacteria	Alphaproteobacteria	Rhizobiales	Rhodobiaceae		Unassigned
ASV869	0	0	23	138	282	47	0	0	0	0	0	0	0	0	0	0	7	497	Bacteria{superkingdom}(100);Unassigned{phylum}(0);Unassigned{class}(0);Unassigned{order}(0);Unassigned{family}(0);Unassigned{genus}(0);Unassigned{species}(0)	Bacteria	Unassigned	Unassigned	Unassigned	Unassigned	Unassigned	Unassigned
ASV870	70	76	0	62	52	216	5	0	0	0	0	0	0	0	0	159	26	666	Bacteria{superkingdom}(83);Proteobacteria{phylum}(83);Betaproteobacteria{class}(83);{order}(83);{family}(83);{genus}(83);uncultured_microorganism{species}(83)	Bacteria	Proteobacteria	Betaproteobacteria				uncultured_microorganism
ASV871	101	0	80	28	64	161	0	0	0	0	0	0	9	0	0	0	0	443	Bacteria{superkingdom}(100);candidate_division_WPS-1{phylum}(100);{class}(100);{order}(100);{family}(100);WPS-1_genera_incertae_sedis{genus}(100);Unassigned{species}(0)	Bacteria	candidate_division_WPS-1				WPS-1_genera_incertae_sedis	Unassigned
ASV872	48	0	41	45	0	100	0	0	0	44	52	0	218	0	11	19	0	578	Bacteria{superkingdom}(98);Chloroflexi{phylum}(98);Chloroflexia{class}(98);Kallotenuales{order}(98);Kallotenuaceae{family}(98);Kallotenue{genus}(98);uncultured_bacterium{species}(98)	Bacteria	Chloroflexi	Chloroflexia	Kallotenuales	Kallotenuaceae	Kallotenue	uncultured_bacterium
ASV873	0	0	0	0	0	235	0	0	0	0	0	0	0	0	0	0	0	235	Bacteria{superkingdom}(99);Proteobacteria{phylum}(99);Gammaproteobacteria{class}(99);Xanthomonadales{order}(99);Sinobacteraceae{family}(99);Povalibacter{genus}(99);Unassigned{species}(0)	Bacteria	Proteobacteria	Gammaproteobacteria	Xanthomonadales	Sinobacteraceae	Povalibacter	Unassigned
ASV874	0	0	0	0	0	0	0	0	0	0	0	0	0	0	0	10	36	46	Bacteria{superkingdom}(91);Candidatus_Saccharibacteria{phylum}(91);{class}(91);{order}(91);{family}(91);Saccharibacteria_genera_incertae_sedis{genus}(91);uncultured_bacterium{species}(91)	Bacteria	Candidatus_Saccharibacteria				Saccharibacteria_genera_incertae_sedis	uncultured_bacterium
ASV875	169	372	47	0	88	0	0	149	0	119	0	73	0	0	0	92	7	1116	Bacteria{superkingdom}(82);Actinobacteria{phylum}(82);Actinobacteria{class}(82);Solirubrobacterales{order}(82);Conexibacteraceae{family}(82);Conexibacter{genus}(82);uncultured_bacterium{species}(82)	Bacteria	Actinobacteria	Actinobacteria	Solirubrobacterales	Conexibacteraceae	Conexibacter	uncultured_bacterium
ASV876	90	0	58	37	120	84	16	29	0	27	0	11	0	0	0	0	0	472	Bacteria{superkingdom}(100);Chloroflexi{phylum}(100);Chloroflexia{class}(100);{order}(100);{family}(100);{genus}(100);uncultured_bacterium{species}(100)	Bacteria	Chloroflexi	Chloroflexia				uncultured_bacterium
ASV877	124	0	0	112	648	201	22	0	12	0	0	0	0	0	0	0	0	1119	Bacteria{superkingdom}(100);Armatimonadetes{phylum}(100);{class}(100);{order}(100);{family}(100);Armatimonadetes_gp5{genus}(100);Unassigned{species}(0)	Bacteria	Armatimonadetes				Armatimonadetes_gp5	Unassigned
ASV878	197	0	40	219	348	0	0	0	0	0	0	0	0	0	0	0	0	804	Bacteria{superkingdom}(99);Proteobacteria{phylum}(99);Gammaproteobacteria{class}(99);Xanthomonadales{order}(99);Sinobacteraceae{family}(99);Povalibacter{genus}(99);Unassigned{species}(0)	Bacteria	Proteobacteria	Gammaproteobacteria	Xanthomonadales	Sinobacteraceae	Povalibacter	Unassigned
ASV879	131	0	39	0	0	38	0	0	0	0	0	0	0	0	0	26	0	234	Bacteria{superkingdom}(100);Acidobacteria{phylum}(100);Acidobacteria_Gp6{class}(100);{order}(100);{family}(100);Gp6{genus}(100);Unassigned{species}(0)	Bacteria	Acidobacteria	Acidobacteria_Gp6			Gp6	Unassigned
ASV880	0	0	0	0	0	51	200	16	0	0	234	0	0	0	611	0	194	1306	Bacteria{superkingdom}(99);Actinobacteria{phylum}(99);Actinobacteria{class}(99);{order}(99);{family}(99);{genus}(99);uncultured_Actinomycetales_bacterium{species}(99)	Bacteria	Actinobacteria	Actinobacteria				uncultured_Actinomycetales_bacterium
ASV881	80	0	54	80	0	139	30	55	50	132	59	46	0	91	0	36	49	901	Bacteria{superkingdom}(89);Actinobacteria{phylum}(89);Actinobacteria{class}(89);Solirubrobacterales{order}(89);Solirubrobacteraceae{family}(89);Solirubrobacter{genus}(89);Unassigned{species}(0)	Bacteria	Actinobacteria	Actinobacteria	Solirubrobacterales	Solirubrobacteraceae	Solirubrobacter	Unassigned
ASV882	46	0	28	37	0	53	0	0	0	0	0	0	0	0	84	0	0	248	Bacteria{superkingdom}(99);Proteobacteria{phylum}(99);Alphaproteobacteria{class}(99);Rhizobiales{order}(99);Phyllobacteriaceae{family}(99);Mesorhizobium{genus}(99);Unassigned{species}(0)	Bacteria	Proteobacteria	Alphaproteobacteria	Rhizobiales	Phyllobacteriaceae	Mesorhizobium	Unassigned
ASV883	0	0	23	47	67	0	43	168	356	136	33	182	33	12	0	0	27	1127	Bacteria{superkingdom}(100);Actinobacteria{phylum}(100);Actinobacteria{class}(100);Solirubrobacterales{order}(100);Unassigned{family}(0);Unassigned{genus}(0);Unassigned{species}(0)	Bacteria	Actinobacteria	Actinobacteria	Solirubrobacterales	Unassigned	Unassigned	Unassigned
ASV885	29	0	0	0	0	16	0	0	11	0	0	20	0	0	49	0	0	125	Bacteria{superkingdom}(100);Proteobacteria{phylum}(100);Alphaproteobacteria{class}(100);Rhizobiales{order}(100);Unassigned{family}(0);Unassigned{genus}(0);Unassigned{species}(0)	Bacteria	Proteobacteria	Alphaproteobacteria	Rhizobiales	Unassigned	Unassigned	Unassigned
ASV886	33	72	20	27	439	98	0	0	0	0	0	0	18	0	0	0	0	707	Bacteria{superkingdom}(100);Actinobacteria{phylum}(100);Actinobacteria{class}(100);Actinomycetales{order}(100);Micromonosporaceae{family}(100);Unassigned{genus}(0);Unassigned{species}(0)	Bacteria	Actinobacteria	Actinobacteria	Actinomycetales	Micromonosporaceae	Unassigned	Unassigned
ASV887	0	92	0	109	391	114	8	0	0	0	0	0	0	0	0	0	26	740	Bacteria{superkingdom}(100);Actinobacteria{phylum}(100);Actinobacteria{class}(100);Actinomycetales{order}(100);Jiangellaceae{family}(100);Unassigned{genus}(0);Unassigned{species}(0)	Bacteria	Actinobacteria	Actinobacteria	Actinomycetales	Jiangellaceae	Unassigned	Unassigned
ASV888	0	54	0	0	59	0	0	0	59	79	61	36	30	14	33	65	110	600	Bacteria{superkingdom}(91);Omnitrophica{phylum}(91);{class}(91);{order}(91);{family}(91);Omnitrophica_genera_incertae_sedis{genus}(91);uncultured_soil_bacterium{species}(91)	Bacteria	Omnitrophica				Omnitrophica_genera_incertae_sedis	uncultured_soil_bacterium
ASV889	40	0	46	1	135	33	0	0	0	0	0	16	6	15	0	10	5	307	Bacteria{superkingdom}(100);Planctomycetes{phylum}(100);Planctomycetia{class}(100);Planctomycetales{order}(100);Planctomycetaceae{family}(100);Pirellula{genus}(100);Unassigned{species}(0)	Bacteria	Planctomycetes	Planctomycetia	Planctomycetales	Planctomycetaceae	Pirellula	Unassigned
ASV890	35	22	20	0	0	0	0	39	22	0	107	0	30	0	6	0	0	281	Bacteria{superkingdom}(100);Acidobacteria{phylum}(100);Acidobacteria_Gp6{class}(100);{order}(100);{family}(100);Gp6{genus}(100);Unassigned{species}(0)	Bacteria	Acidobacteria	Acidobacteria_Gp6			Gp6	Unassigned
ASV891	0	0	0	0	0	0	4	0	8	0	0	0	0	0	0	0	0	12	Bacteria{superkingdom}(99);{phylum}(99);{class}(99);{order}(99);{family}(99);{genus}(99);Unassigned{species}(0)	Bacteria						Unassigned
ASV892	0	0	53	24	120	0	12	0	133	47	15	49	243	231	52	0	361	1340	Bacteria{superkingdom}(100);Gemmatimonadetes{phylum}(100);Gemmatimonadetes{class}(100);Gemmatimonadales{order}(100);Gemmatimonadaceae{family}(100);Gemmatimonas{genus}(100);Unassigned{species}(0)	Bacteria	Gemmatimonadetes	Gemmatimonadetes	Gemmatimonadales	Gemmatimonadaceae	Gemmatimonas	Unassigned
ASV893	32	0	0	24	0	0	0	0	20	14	15	16	0	38	26	22	0	207	Bacteria{superkingdom}(98);Acidobacteria{phylum}(98);Acidobacteria_Gp4{class}(98);{order}(98);{family}(98);Aridibacter{genus}(98);uncultured_organism{species}(98)	Bacteria	Acidobacteria	Acidobacteria_Gp4			Aridibacter	uncultured_organism
ASV894	0	0	0	0	0	0	0	14	0	0	0	27	0	0	0	0	0	41	Bacteria{superkingdom}(100);Actinobacteria{phylum}(100);Actinobacteria{class}(100);Actinomycetales{order}(100);Nocardiaceae{family}(100);Nocardia{genus}(100);Unassigned{species}(0)	Bacteria	Actinobacteria	Actinobacteria	Actinomycetales	Nocardiaceae	Nocardia	Unassigned
ASV895	0	0	0	27	23	650	0	0	0	0	0	0	12	0	0	0	0	712	Bacteria{superkingdom}(99);Acidobacteria{phylum}(99);Acidobacteria_Gp4{class}(99);{order}(99);{family}(99);Aridibacter{genus}(99);Unassigned{species}(0)	Bacteria	Acidobacteria	Acidobacteria_Gp4			Aridibacter	Unassigned
ASV896	0	0	0	51	0	0	0	0	0	0	0	0	0	0	0	0	0	51	Bacteria{superkingdom}(100);Bacteroidetes{phylum}(100);Cytophagia{class}(100);Cytophagales{order}(100);Cytophagaceae{family}(100);Hymenobacter{genus}(100);Unassigned{species}(0)	Bacteria	Bacteroidetes	Cytophagia	Cytophagales	Cytophagaceae	Hymenobacter	Unassigned
ASV897	124	0	55	0	165	68	34	6	110	0	0	0	0	0	0	0	0	562	Bacteria{superkingdom}(92);Gemmatimonadetes{phylum}(92);Gemmatimonadetes{class}(92);Gemmatimonadales{order}(92);Gemmatimonadaceae{family}(92);Gemmatimonas{genus}(92);Unassigned{species}(0)	Bacteria	Gemmatimonadetes	Gemmatimonadetes	Gemmatimonadales	Gemmatimonadaceae	Gemmatimonas	Unassigned
ASV898	52	79	0	0	52	97	0	0	137	0	0	50	16	0	0	26	0	509	Bacteria{superkingdom}(100);{phylum}(100);{class}(100);{order}(100);{family}(100);{genus}(100);uncultured_candidate_division_SPAM_bacterium{species}(100)	Bacteria						uncultured_candidate_division_SPAM_bacterium
ASV899	0	0	0	0	0	0	0	0	8	21	0	0	0	0	0	0	0	29	Bacteria{superkingdom}(99);Actinobacteria{phylum}(99);Actinobacteria{class}(99);Solirubrobacterales{order}(99);Conexibacteraceae{family}(99);Conexibacter{genus}(99);Unassigned{species}(0)	Bacteria	Actinobacteria	Actinobacteria	Solirubrobacterales	Conexibacteraceae	Conexibacter	Unassigned
ASV900	93	166	121	0	71	117	32	0	0	0	0	0	0	0	0	0	0	600	Bacteria{superkingdom}(92);{phylum}(92);{class}(92);{order}(92);{family}(92);{genus}(92);uncultured_Micromonospora_sp.{species}(92)	Bacteria						uncultured_Micromonospora_sp.
ASV901	11	49	0	0	0	70	44	10	49	38	27	37	15	28	70	53	8	509	Bacteria{superkingdom}(100);Verrucomicrobia{phylum}(100);Subdivision3{class}(100);{order}(100);{family}(100);Subdivision3_genera_incertae_sedis{genus}(100);Unassigned{species}(0)	Bacteria	Verrucomicrobia	Subdivision3			Subdivision3_genera_incertae_sedis	Unassigned
ASV903	0	0	0	53	0	0	41	0	0	0	0	0	66	74	72	151	93	550	Bacteria{superkingdom}(96);Proteobacteria{phylum}(96);Alphaproteobacteria{class}(96);Rhizobiales{order}(96);Xanthobacteraceae{family}(96);Pseudolabrys{genus}(96);Unassigned{species}(0)	Bacteria	Proteobacteria	Alphaproteobacteria	Rhizobiales	Xanthobacteraceae	Pseudolabrys	Unassigned
ASV904	80	27	41	0	0	111	20	0	0	0	0	0	0	0	0	0	0	279	Bacteria{superkingdom}(100);Acidobacteria{phylum}(100);Acidobacteria_Gp6{class}(100);{order}(100);{family}(100);Gp6{genus}(100);Unassigned{species}(0)	Bacteria	Acidobacteria	Acidobacteria_Gp6			Gp6	Unassigned
ASV905	0	0	0	0	261	51	0	0	0	0	0	0	0	0	0	0	0	312	Bacteria{superkingdom}(100);Proteobacteria{phylum}(100);Alphaproteobacteria{class}(100);Rhizobiales{order}(100);Phyllobacteriaceae{family}(100);Unassigned{genus}(0);Unassigned{species}(0)	Bacteria	Proteobacteria	Alphaproteobacteria	Rhizobiales	Phyllobacteriaceae	Unassigned	Unassigned
ASV906	0	0	0	0	755	383	0	0	0	0	0	0	0	0	0	0	0	1138	Bacteria{superkingdom}(100);Bacteroidetes{phylum}(100);Flavobacteriia{class}(100);Flavobacteriales{order}(100);Flavobacteriaceae{family}(100);Chryseobacterium{genus}(100);Unassigned{species}(0)	Bacteria	Bacteroidetes	Flavobacteriia	Flavobacteriales	Flavobacteriaceae	Chryseobacterium	Unassigned
ASV907	80	0	43	0	168	0	0	13	70	24	0	74	0	0	0	0	64	536	Bacteria{superkingdom}(100);Chloroflexi{phylum}(100);Chloroflexia{class}(100);Kallotenuales{order}(100);Kallotenuaceae{family}(100);Kallotenue{genus}(100);uncultured_bacterium{species}(100)	Bacteria	Chloroflexi	Chloroflexia	Kallotenuales	Kallotenuaceae	Kallotenue	uncultured_bacterium
ASV908	32	258	86	0	0	31	19	0	0	0	0	0	0	0	0	0	3	429	Bacteria{superkingdom}(99);Proteobacteria{phylum}(99);Deltaproteobacteria{class}(99);{order}(99);{family}(99);{genus}(99);Unassigned{species}(0)	Bacteria	Proteobacteria	Deltaproteobacteria				Unassigned
ASV909	40	226	17	0	0	0	0	60	25	137	0	0	0	0	0	0	20	525	Bacteria{superkingdom}(100);Chloroflexi{phylum}(100);{class}(100);{order}(100);{family}(100);{genus}(100);uncultured_Firmicutes_bacterium{species}(100)	Bacteria	Chloroflexi					uncultured_Firmicutes_bacterium
ASV910	0	0	154	73	43	0	0	0	0	0	47	0	210	0	0	0	28	555	Bacteria{superkingdom}(100);Bacteroidetes{phylum}(100);Cytophagia{class}(100);Cytophagales{order}(100);Cytophagaceae{family}(100);Adhaeribacter{genus}(100);Unassigned{species}(0)	Bacteria	Bacteroidetes	Cytophagia	Cytophagales	Cytophagaceae	Adhaeribacter	Unassigned
ASV911	28	0	0	190	0	0	0	0	0	203	0	10	0	0	0	0	98	529	Bacteria{superkingdom}(100);Acidobacteria{phylum}(100);Acidobacteria_Gp10{class}(100);{order}(100);{family}(100);Gp10{genus}(100);Unassigned{species}(0)	Bacteria	Acidobacteria	Acidobacteria_Gp10			Gp10	Unassigned
ASV912	0	0	0	0	0	0	0	0	0	0	0	0	0	0	0	10	20	30	Bacteria{superkingdom}(100);{phylum}(100);{class}(100);{order}(100);{family}(100);{genus}(100);Unassigned{species}(0)	Bacteria						Unassigned
ASV913	0	0	0	30	0	0	0	0	0	0	0	0	33	53	1	0	0	117	Bacteria{superkingdom}(87);Candidatus_Saccharibacteria{phylum}(87);{class}(87);{order}(87);{family}(87);Saccharibacteria_genera_incertae_sedis{genus}(87);uncultured_bacterium{species}(87)	Bacteria	Candidatus_Saccharibacteria				Saccharibacteria_genera_incertae_sedis	uncultured_bacterium
ASV914	47	0	0	40	110	54	0	0	0	0	0	0	0	0	0	0	0	251	Bacteria{superkingdom}(86);Proteobacteria{phylum}(86);Gammaproteobacteria{class}(86);Xanthomonadales{order}(86);Sinobacteraceae{family}(86);Povalibacter{genus}(86);uncultured_bacterium{species}(86)	Bacteria	Proteobacteria	Gammaproteobacteria	Xanthomonadales	Sinobacteraceae	Povalibacter	uncultured_bacterium
ASV915	0	0	0	0	100	0	0	0	0	0	0	0	0	0	0	0	0	100	Bacteria{superkingdom}(95);Acidobacteria{phylum}(95);Acidobacteria_Gp10{class}(95);{order}(95);{family}(95);Gp10{genus}(95);uncultured_Pelobacter_sp.{species}(95)	Bacteria	Acidobacteria	Acidobacteria_Gp10			Gp10	uncultured_Pelobacter_sp.
ASV916	35	147	32	0	45	38	32	5	0	13	0	6	0	0	0	0	0	353	Bacteria{superkingdom}(100);candidate_division_WPS-1{phylum}(100);{class}(100);{order}(100);{family}(100);WPS-1_genera_incertae_sedis{genus}(100);Unassigned{species}(0)	Bacteria	candidate_division_WPS-1				WPS-1_genera_incertae_sedis	Unassigned
ASV917	0	0	0	27	103	29	0	0	0	0	8	13	0	0	0	8	0	188	Bacteria{superkingdom}(98);Planctomycetes{phylum}(98);Planctomycetia{class}(98);Planctomycetales{order}(98);Planctomycetaceae{family}(98);Blastopirellula{genus}(98);uncultured_Planctomycetaceae_bacterium{species}(98)	Bacteria	Planctomycetes	Planctomycetia	Planctomycetales	Planctomycetaceae	Blastopirellula	uncultured_Planctomycetaceae_bacterium
ASV918	24	0	50	102	43	57	15	15	17	0	48	38	315	188	24	100	73	1109	Bacteria{superkingdom}(89);Actinobacteria{phylum}(89);Actinobacteria{class}(89);Solirubrobacterales{order}(89);{family}(89);{genus}(89);Unassigned{species}(0)	Bacteria	Actinobacteria	Actinobacteria	Solirubrobacterales			Unassigned
ASV919	0	0	23	58	98	5	0	0	0	0	0	0	0	0	0	0	0	184	Bacteria{superkingdom}(100);Armatimonadetes{phylum}(100);{class}(100);{order}(100);{family}(100);Armatimonadetes_gp5{genus}(100);Unassigned{species}(0)	Bacteria	Armatimonadetes				Armatimonadetes_gp5	Unassigned
ASV920	44	246	0	65	86	33	0	25	13	41	52	7	0	0	0	35	14	661	Bacteria{superkingdom}(100);Chloroflexi{phylum}(100);{class}(100);{order}(100);{family}(100);{genus}(100);uncultured_Anaerolineae_bacterium{species}(100)	Bacteria	Chloroflexi					uncultured_Anaerolineae_bacterium
ASV921	107	22	0	40	0	42	0	0	0	85	0	0	0	0	0	541	0	837	Bacteria{superkingdom}(100);Unassigned{phylum}(0);Unassigned{class}(0);Unassigned{order}(0);Unassigned{family}(0);Unassigned{genus}(0);Unassigned{species}(0)	Bacteria	Unassigned	Unassigned	Unassigned	Unassigned	Unassigned	Unassigned
ASV922	40	0	23	8	219	0	50	0	0	14	0	0	50	14	0	0	116	534	Bacteria{superkingdom}(92);Ignavibacteriae{phylum}(92);Ignavibacteria{class}(92);Ignavibacteriales{order}(92);Ignavibacteriaceae{family}(92);{genus}(92);uncultured_soil_bacterium{species}(92)	Bacteria	Ignavibacteriae	Ignavibacteria	Ignavibacteriales	Ignavibacteriaceae		uncultured_soil_bacterium
ASV924	73	72	43	24	0	63	19	0	43	40	0	0	0	0	0	0	0	377	Bacteria{superkingdom}(100);Gemmatimonadetes{phylum}(100);Gemmatimonadetes{class}(100);Gemmatimonadales{order}(100);Gemmatimonadaceae{family}(100);Gemmatimonas{genus}(100);Unassigned{species}(0)	Bacteria	Gemmatimonadetes	Gemmatimonadetes	Gemmatimonadales	Gemmatimonadaceae	Gemmatimonas	Unassigned
ASV926	44	0	30	45	148	0	0	10	0	0	39	15	6	14	7	19	0	377	Bacteria{superkingdom}(100);Proteobacteria{phylum}(100);Alphaproteobacteria{class}(100);Caulobacterales{order}(100);Caulobacteraceae{family}(100);Brevundimonas{genus}(100);Unassigned{species}(0)	Bacteria	Proteobacteria	Alphaproteobacteria	Caulobacterales	Caulobacteraceae	Brevundimonas	Unassigned
ASV927	70	53	7	0	16	71	0	0	0	0	0	0	0	0	0	11	0	228	Bacteria{superkingdom}(100);Chloroflexi{phylum}(100);Thermomicrobia{class}(100);Sphaerobacterales{order}(100);Sphaerobacteraceae{family}(100);Unassigned{genus}(0);Unassigned{species}(0)	Bacteria	Chloroflexi	Thermomicrobia	Sphaerobacterales	Sphaerobacteraceae	Unassigned	Unassigned
ASV928	0	508	0	0	0	0	0	0	0	0	0	0	0	0	0	0	0	508	Bacteria{superkingdom}(83);Bacteroidetes{phylum}(83);Sphingobacteriia{class}(83);Sphingobacteriales{order}(83);Chitinophagaceae{family}(83);{genus}(83);Unassigned{species}(0)	Bacteria	Bacteroidetes	Sphingobacteriia	Sphingobacteriales	Chitinophagaceae		Unassigned
ASV929	36	27	19	0	0	0	51	112	62	78	0	189	0	9	0	0	129	712	Bacteria{superkingdom}(100);Planctomycetes{phylum}(100);Planctomycetia{class}(100);Planctomycetales{order}(100);Planctomycetaceae{family}(100);Unassigned{genus}(0);Unassigned{species}(0)	Bacteria	Planctomycetes	Planctomycetia	Planctomycetales	Planctomycetaceae	Unassigned	Unassigned
ASV930	0	0	27	50	168	287	0	10	0	0	35	0	0	0	0	11	0	588	Bacteria{superkingdom}(100);Proteobacteria{phylum}(100);Deltaproteobacteria{class}(100);Myxococcales{order}(100);Unassigned{family}(0);Unassigned{genus}(0);Unassigned{species}(0)	Bacteria	Proteobacteria	Deltaproteobacteria	Myxococcales	Unassigned	Unassigned	Unassigned
ASV931	0	0	19	77	0	0	0	0	0	0	0	0	0	0	0	0	0	96	Bacteria{superkingdom}(99);Proteobacteria{phylum}(99);Gammaproteobacteria{class}(99);Xanthomonadales{order}(99);Sinobacteraceae{family}(99);Steroidobacter{genus}(99);Unassigned{species}(0)	Bacteria	Proteobacteria	Gammaproteobacteria	Xanthomonadales	Sinobacteraceae	Steroidobacter	Unassigned
ASV932	0	0	0	5	0	0	0	0	0	0	0	0	0	0	0	0	0	5	Bacteria{superkingdom}(100);Acidobacteria{phylum}(100);Acidobacteria_Gp7{class}(100);{order}(100);{family}(100);Gp7{genus}(100);Unassigned{species}(0)	Bacteria	Acidobacteria	Acidobacteria_Gp7			Gp7	Unassigned
ASV933	0	0	20	12	0	51	43	0	50	0	56	0	303	6	0	0	26	567	Bacteria{superkingdom}(100);Chloroflexi{phylum}(100);{class}(100);{order}(100);{family}(100);{genus}(100);Unassigned{species}(0)	Bacteria	Chloroflexi					Unassigned
ASV935	70	0	0	0	0	0	91	145	108	0	90	72	24	17	27	48	0	692	Bacteria{superkingdom}(100);Proteobacteria{phylum}(100);Alphaproteobacteria{class}(100);Rhizobiales{order}(100);Rhodobiaceae{family}(100);Unassigned{genus}(0);Unassigned{species}(0)	Bacteria	Proteobacteria	Alphaproteobacteria	Rhizobiales	Rhodobiaceae	Unassigned	Unassigned
ASV936	101	0	47	90	219	115	0	0	0	0	0	0	245	0	0	0	0	817	Bacteria{superkingdom}(98);Proteobacteria{phylum}(98);Betaproteobacteria{class}(98);Burkholderiales{order}(98);Burkholderiales_incertae_sedis{family}(98);Unassigned{genus}(0);Unassigned{species}(0)	Bacteria	Proteobacteria	Betaproteobacteria	Burkholderiales	Burkholderiales_incertae_sedis	Unassigned	Unassigned
ASV937	0	26	0	0	64	65	0	0	9	36	0	12	59	0	46	66	47	430	Bacteria{superkingdom}(91);Armatimonadetes{phylum}(91);{class}(91);{order}(91);{family}(91);Armatimonadetes_gp4{genus}(91);uncultured_actinobacterium{species}(91)	Bacteria	Armatimonadetes				Armatimonadetes_gp4	uncultured_actinobacterium
ASV938	0	0	0	0	204	0	0	0	0	0	0	0	0	37	0	26	0	267	Bacteria{superkingdom}(100);Verrucomicrobia{phylum}(100);Opitutae{class}(100);Opitutales{order}(100);Opitutaceae{family}(100);Opitutus{genus}(100);Unassigned{species}(0)	Bacteria	Verrucomicrobia	Opitutae	Opitutales	Opitutaceae	Opitutus	Unassigned
ASV939	0	0	0	0	668	12	0	0	0	0	0	0	0	0	0	0	0	680	Bacteria{superkingdom}(100);Proteobacteria{phylum}(100);Deltaproteobacteria{class}(100);Bdellovibrionales{order}(100);Bdellovibrionaceae{family}(100);Vampirovibrio{genus}(100);Unassigned{species}(0)	Bacteria	Proteobacteria	Deltaproteobacteria	Bdellovibrionales	Bdellovibrionaceae	Vampirovibrio	Unassigned
ASV940	70	0	57	134	128	40	0	0	0	0	0	0	0	0	0	0	0	429	Bacteria{superkingdom}(97);Proteobacteria{phylum}(97);Alphaproteobacteria{class}(97);Rhizobiales{order}(97);Phyllobacteriaceae{family}(97);Mesorhizobium{genus}(97);Unassigned{species}(0)	Bacteria	Proteobacteria	Alphaproteobacteria	Rhizobiales	Phyllobacteriaceae	Mesorhizobium	Unassigned
ASV941	112	0	8	87	115	0	2	0	0	22	0	0	0	0	0	0	32	378	Bacteria{superkingdom}(83);Proteobacteria{phylum}(83);Deltaproteobacteria{class}(83);Myxococcales{order}(83);{family}(83);{genus}(83);Unassigned{species}(0)	Bacteria	Proteobacteria	Deltaproteobacteria	Myxococcales			Unassigned
ASV942	0	29	87	0	0	91	42	0	0	0	58	0	15	0	107	0	0	429	Bacteria{superkingdom}(100);Acidobacteria{phylum}(100);Acidobacteria_Gp16{class}(100);{order}(100);{family}(100);Gp16{genus}(100);Unassigned{species}(0)	Bacteria	Acidobacteria	Acidobacteria_Gp16			Gp16	Unassigned
ASV943	0	0	0	68	86	0	0	27	0	0	0	0	0	0	0	0	14	195	Bacteria{superkingdom}(99);Actinobacteria{phylum}(99);Actinobacteria{class}(99);Actinomycetales{order}(99);Nocardioidaceae{family}(99);Nocardioides{genus}(99);Unassigned{species}(0)	Bacteria	Actinobacteria	Actinobacteria	Actinomycetales	Nocardioidaceae	Nocardioides	Unassigned
ASV944	0	0	0	0	0	29	72	43	119	67	0	0	31	15	26	39	78	519	Bacteria{superkingdom}(98);Acidobacteria{phylum}(98);Acidobacteria_Gp6{class}(98);{order}(98);{family}(98);Gp6{genus}(98);Unassigned{species}(0)	Bacteria	Acidobacteria	Acidobacteria_Gp6			Gp6	Unassigned
ASV945	0	67	22	15	50	0	37	41	82	118	24	69	104	44	59	87	262	1081	Bacteria{superkingdom}(100);Proteobacteria{phylum}(100);Alphaproteobacteria{class}(100);Rhodobacterales{order}(100);Rhodobacteraceae{family}(100);Rubellimicrobium{genus}(100);Unassigned{species}(0)	Bacteria	Proteobacteria	Alphaproteobacteria	Rhodobacterales	Rhodobacteraceae	Rubellimicrobium	Unassigned
ASV946	42	0	26	12	48	0	0	0	35	53	0	16	129	16	0	14	48	439	Bacteria{superkingdom}(81);Proteobacteria{phylum}(81);Deltaproteobacteria{class}(81);Myxococcales{order}(81);Kofleriaceae{family}(81);Kofleria{genus}(81);uncultured_delta_proteobacterium{species}(81)	Bacteria	Proteobacteria	Deltaproteobacteria	Myxococcales	Kofleriaceae	Kofleria	uncultured_delta_proteobacterium
ASV947	0	0	0	28	0	0	34	0	24	0	0	0	0	0	0	0	0	86	Bacteria{superkingdom}(98);Bacteroidetes{phylum}(98);Sphingobacteriia{class}(98);Sphingobacteriales{order}(98);Chitinophagaceae{family}(98);Niastella{genus}(98);Unassigned{species}(0)	Bacteria	Bacteroidetes	Sphingobacteriia	Sphingobacteriales	Chitinophagaceae	Niastella	Unassigned
ASV948	39	26	11	34	88	28	0	25	14	46	0	58	14	0	42	33	91	549	Bacteria{superkingdom}(100);Proteobacteria{phylum}(100);Alphaproteobacteria{class}(100);Rhizobiales{order}(100);Unassigned{family}(0);Unassigned{genus}(0);Unassigned{species}(0)	Bacteria	Proteobacteria	Alphaproteobacteria	Rhizobiales	Unassigned	Unassigned	Unassigned
ASV949	100	0	43	27	0	60	0	68	39	82	0	48	30	0	0	0	27	524	Bacteria{superkingdom}(100);Planctomycetes{phylum}(100);Planctomycetia{class}(100);Planctomycetales{order}(100);Planctomycetaceae{family}(100);Pirellula{genus}(100);Unassigned{species}(0)	Bacteria	Planctomycetes	Planctomycetia	Planctomycetales	Planctomycetaceae	Pirellula	Unassigned
ASV950	0	13	0	0	158	0	0	0	0	0	0	0	18	10	8	0	0	207	Bacteria{superkingdom}(100);Proteobacteria{phylum}(100);Alphaproteobacteria{class}(100);Rhizobiales{order}(100);{family}(100);{genus}(100);Unassigned{species}(0)	Bacteria	Proteobacteria	Alphaproteobacteria	Rhizobiales			Unassigned
ASV951	35	151	39	16	0	27	0	28	47	87	98	30	33	25	43	0	21	680	Bacteria{superkingdom}(98);Acidobacteria{phylum}(98);Acidobacteria_Gp3{class}(98);{order}(98);{family}(98);Gp3{genus}(98);uncultured_Candidatus_Solibacter_sp.{species}(98)	Bacteria	Acidobacteria	Acidobacteria_Gp3			Gp3	uncultured_Candidatus_Solibacter_sp.
ASV952	51	0	54	124	108	217	0	0	0	0	0	0	0	0	0	0	0	554	Bacteria{superkingdom}(100);Actinobacteria{phylum}(100);Actinobacteria{class}(100);Actinomycetales{order}(100);Nocardioidaceae{family}(100);Nocardioides{genus}(100);Unassigned{species}(0)	Bacteria	Actinobacteria	Actinobacteria	Actinomycetales	Nocardioidaceae	Nocardioides	Unassigned
ASV953	31	0	21	34	32	35	0	0	0	14	0	10	19	32	15	33	16	292	Bacteria{superkingdom}(99);Proteobacteria{phylum}(99);Betaproteobacteria{class}(99);{order}(99);{family}(99);{genus}(99);uncultured_Burkholderiaceae_bacterium{species}(99)	Bacteria	Proteobacteria	Betaproteobacteria				uncultured_Burkholderiaceae_bacterium
ASV954	188	0	0	253	91	165	0	0	0	15	0	0	0	0	0	0	0	712	Bacteria{superkingdom}(92);Proteobacteria{phylum}(92);Gammaproteobacteria{class}(92);Xanthomonadales{order}(92);Xanthomonadaceae{family}(92);Luteimonas{genus}(92);Unassigned{species}(0)	Bacteria	Proteobacteria	Gammaproteobacteria	Xanthomonadales	Xanthomonadaceae	Luteimonas	Unassigned
ASV955	70	0	0	126	175	0	0	0	0	0	0	0	0	0	0	0	0	371	Bacteria{superkingdom}(100);Proteobacteria{phylum}(100);Alphaproteobacteria{class}(100);Rhizobiales{order}(100);Phyllobacteriaceae{family}(100);Mesorhizobium{genus}(100);Unassigned{species}(0)	Bacteria	Proteobacteria	Alphaproteobacteria	Rhizobiales	Phyllobacteriaceae	Mesorhizobium	Unassigned
ASV956	95	0	52	41	36	104	31	0	16	6	0	0	0	0	0	0	0	381	Bacteria{superkingdom}(82);Proteobacteria{phylum}(82);Gammaproteobacteria{class}(82);Xanthomonadales{order}(82);Sinobacteraceae{family}(82);Unassigned{genus}(0);Unassigned{species}(0)	Bacteria	Proteobacteria	Gammaproteobacteria	Xanthomonadales	Sinobacteraceae	Unassigned	Unassigned
ASV957	0	0	30	105	133	35	0	0	0	19	0	0	0	0	0	0	0	322	Bacteria{superkingdom}(98);Proteobacteria{phylum}(98);Gammaproteobacteria{class}(98);{order}(98);{family}(98);{genus}(98);uncultured_Steroidobacter_sp.{species}(98)	Bacteria	Proteobacteria	Gammaproteobacteria				uncultured_Steroidobacter_sp.
ASV958	29	0	14	12	50	38	0	0	0	0	0	0	5	0	0	0	0	148	Bacteria{superkingdom}(99);Proteobacteria{phylum}(99);Alphaproteobacteria{class}(99);{order}(99);{family}(99);{genus}(99);Unassigned{species}(0)	Bacteria	Proteobacteria	Alphaproteobacteria				Unassigned
ASV959	1266	350	0	0	0	0	0	0	0	0	0	0	0	0	0	0	0	1616	Bacteria{superkingdom}(99);Actinobacteria{phylum}(99);Actinobacteria{class}(99);Actinomycetales{order}(99);Streptomycetaceae{family}(99);Streptomyces{genus}(99);Unassigned{species}(0)	Bacteria	Actinobacteria	Actinobacteria	Actinomycetales	Streptomycetaceae	Streptomyces	Unassigned
ASV960	58	0	30	331	133	27	0	0	0	0	0	0	0	0	0	0	0	579	Bacteria{superkingdom}(95);Proteobacteria{phylum}(95);Gammaproteobacteria{class}(95);Xanthomonadales{order}(95);Xanthomonadaceae{family}(95);Lysobacter{genus}(95);Unassigned{species}(0)	Bacteria	Proteobacteria	Gammaproteobacteria	Xanthomonadales	Xanthomonadaceae	Lysobacter	Unassigned
ASV961	0	29	0	0	20	0	0	0	0	17	0	31	0	74	29	195	188	583	Bacteria{superkingdom}(100);Actinobacteria{phylum}(100);Actinobacteria{class}(100);Actinomycetales{order}(100);Thermomonosporaceae{family}(100);Actinomadura{genus}(100);Unassigned{species}(0)	Bacteria	Actinobacteria	Actinobacteria	Actinomycetales	Thermomonosporaceae	Actinomadura	Unassigned
ASV962	164	0	86	47	0	31	114	156	175	70	0	126	0	0	0	0	0	969	Bacteria{superkingdom}(100);Actinobacteria{phylum}(100);Actinobacteria{class}(100);Solirubrobacterales{order}(100);Unassigned{family}(0);Unassigned{genus}(0);Unassigned{species}(0)	Bacteria	Actinobacteria	Actinobacteria	Solirubrobacterales	Unassigned	Unassigned	Unassigned
ASV963	16	0	0	63	206	8	0	0	0	5	0	0	25	3	8	6	12	352	Bacteria{superkingdom}(99);Bacteroidetes{phylum}(99);Cytophagia{class}(99);Cytophagales{order}(99);Cytophagaceae{family}(99);Larkinella{genus}(99);uncultured_bacterium{species}(99)	Bacteria	Bacteroidetes	Cytophagia	Cytophagales	Cytophagaceae	Larkinella	uncultured_bacterium
ASV964	8	0	314	0	0	0	0	0	0	89	0	0	0	0	0	0	0	411	Bacteria{superkingdom}(100);Acidobacteria{phylum}(100);Acidobacteria_Gp7{class}(100);{order}(100);{family}(100);Gp7{genus}(100);Unassigned{species}(0)	Bacteria	Acidobacteria	Acidobacteria_Gp7			Gp7	Unassigned
ASV965	23	26	36	17	41	24	28	34	35	37	42	6	17	13	9	10	15	413	Bacteria{superkingdom}(100);Unassigned{phylum}(0);Unassigned{class}(0);Unassigned{order}(0);Unassigned{family}(0);Unassigned{genus}(0);Unassigned{species}(0)	Bacteria	Unassigned	Unassigned	Unassigned	Unassigned	Unassigned	Unassigned
ASV966	0	0	0	58	0	273	0	0	0	0	0	0	0	0	0	0	0	331	Bacteria{superkingdom}(100);Proteobacteria{phylum}(100);Betaproteobacteria{class}(100);Burkholderiales{order}(100);Oxalobacteraceae{family}(100);Massilia{genus}(100);Unassigned{species}(0)	Bacteria	Proteobacteria	Betaproteobacteria	Burkholderiales	Oxalobacteraceae	Massilia	Unassigned
ASV967	84	97	55	0	32	0	21	0	17	0	0	15	0	0	0	0	14	335	Bacteria{superkingdom}(100);Unassigned{phylum}(0);Unassigned{class}(0);Unassigned{order}(0);Unassigned{family}(0);Unassigned{genus}(0);Unassigned{species}(0)	Bacteria	Unassigned	Unassigned	Unassigned	Unassigned	Unassigned	Unassigned
ASV968	44	53	51	0	74	139	34	0	0	0	12	4	135	18	0	0	63	627	Bacteria{superkingdom}(99);Actinobacteria{phylum}(99);Actinobacteria{class}(99);Solirubrobacterales{order}(99);Unassigned{family}(0);Unassigned{genus}(0);Unassigned{species}(0)	Bacteria	Actinobacteria	Actinobacteria	Solirubrobacterales	Unassigned	Unassigned	Unassigned
ASV969	36	0	19	27	123	50	0	10	15	0	0	17	0	0	16	0	0	313	Bacteria{superkingdom}(91);Proteobacteria{phylum}(91);Alphaproteobacteria{class}(91);Sphingomonadales{order}(91);Erythrobacteraceae{family}(91);Altererythrobacter{genus}(91);Unassigned{species}(0)	Bacteria	Proteobacteria	Alphaproteobacteria	Sphingomonadales	Erythrobacteraceae	Altererythrobacter	Unassigned
ASV970	458	0	0	0	0	0	0	0	0	0	0	0	0	0	0	0	0	458	Bacteria{superkingdom}(100);Actinobacteria{phylum}(100);Actinobacteria{class}(100);Actinomycetales{order}(100);Pseudonocardiaceae{family}(100);Unassigned{genus}(0);Unassigned{species}(0)	Bacteria	Actinobacteria	Actinobacteria	Actinomycetales	Pseudonocardiaceae	Unassigned	Unassigned
ASV972	94	0	20	35	0	70	0	0	0	0	0	0	0	3	12	23	0	257	Bacteria{superkingdom}(99);Planctomycetes{phylum}(99);Planctomycetia{class}(99);Planctomycetales{order}(99);Planctomycetaceae{family}(99);{genus}(99);Planctomycetaceae_bacterium_LX124{species}(99)	Bacteria	Planctomycetes	Planctomycetia	Planctomycetales	Planctomycetaceae		Planctomycetaceae_bacterium_LX124
ASV973	0	65	32	0	0	35	0	0	12	0	0	0	0	0	12	0	0	156	Bacteria{superkingdom}(100);Proteobacteria{phylum}(100);Alphaproteobacteria{class}(100);Rhizobiales{order}(100);Phyllobacteriaceae{family}(100);Mesorhizobium{genus}(100);Unassigned{species}(0)	Bacteria	Proteobacteria	Alphaproteobacteria	Rhizobiales	Phyllobacteriaceae	Mesorhizobium	Unassigned
ASV974	70	0	4	112	86	127	0	0	0	0	0	0	0	0	0	0	0	399	Bacteria{superkingdom}(83);Proteobacteria{phylum}(83);Gammaproteobacteria{class}(83);Xanthomonadales{order}(83);Sinobacteraceae{family}(83);Unassigned{genus}(0);Unassigned{species}(0)	Bacteria	Proteobacteria	Gammaproteobacteria	Xanthomonadales	Sinobacteraceae	Unassigned	Unassigned
ASV975	61	185	11	0	0	104	23	0	0	43	0	0	0	0	0	15	0	442	Bacteria{superkingdom}(98);Actinobacteria{phylum}(98);Actinobacteria{class}(98);Solirubrobacterales{order}(98);{family}(98);{genus}(98);Unassigned{species}(0)	Bacteria	Actinobacteria	Actinobacteria	Solirubrobacterales			Unassigned
ASV976	37	37	0	0	41	51	0	0	0	12	0	0	0	22	0	21	26	247	Bacteria{superkingdom}(100);{phylum}(100);{class}(100);{order}(100);{family}(100);{genus}(100);uncultured_Anaerolineae_bacterium{species}(100)	Bacteria						uncultured_Anaerolineae_bacterium
ASV977	0	0	95	9	183	0	156	24	242	0	83	145	0	0	0	0	0	937	Bacteria{superkingdom}(100);Planctomycetes{phylum}(100);Planctomycetia{class}(100);Planctomycetales{order}(100);Planctomycetaceae{family}(100);Pirellula{genus}(100);Unassigned{species}(0)	Bacteria	Planctomycetes	Planctomycetia	Planctomycetales	Planctomycetaceae	Pirellula	Unassigned
ASV978	42	13	11	32	125	25	0	0	0	8	0	11	0	10	0	0	0	277	Bacteria{superkingdom}(99);Proteobacteria{phylum}(99);Alphaproteobacteria{class}(99);Rhizobiales{order}(99);Phyllobacteriaceae{family}(99);Mesorhizobium{genus}(99);Unassigned{species}(0)	Bacteria	Proteobacteria	Alphaproteobacteria	Rhizobiales	Phyllobacteriaceae	Mesorhizobium	Unassigned
ASV979	0	0	0	0	2218	153	0	0	0	0	0	0	0	0	0	0	4	2375	Bacteria{superkingdom}(93);Bacteroidetes{phylum}(93);Cytophagia{class}(93);Cytophagales{order}(93);{family}(93);Ohtaekwangia{genus}(93);uncultured_bacterium{species}(93)	Bacteria	Bacteroidetes	Cytophagia	Cytophagales		Ohtaekwangia	uncultured_bacterium
ASV981	27	21	39	17	48	35	20	110	93	67	30	43	71	7	48	14	51	741	Bacteria{superkingdom}(100);Unassigned{phylum}(0);Unassigned{class}(0);Unassigned{order}(0);Unassigned{family}(0);Unassigned{genus}(0);Unassigned{species}(0)	Bacteria	Unassigned	Unassigned	Unassigned	Unassigned	Unassigned	Unassigned
ASV982	0	0	0	0	0	61	0	0	0	0	0	0	0	0	0	0	0	61	Bacteria{superkingdom}(100);Acidobacteria{phylum}(100);Acidobacteria_Gp7{class}(100);{order}(100);{family}(100);Gp7{genus}(100);Unassigned{species}(0)	Bacteria	Acidobacteria	Acidobacteria_Gp7			Gp7	Unassigned
ASV983	36	0	50	11	160	71	49	0	25	10	47	0	12	8	0	0	12	491	Bacteria{superkingdom}(98);Chloroflexi{phylum}(98);Chloroflexia{class}(98);Kallotenuales{order}(98);Kallotenuaceae{family}(98);Kallotenue{genus}(98);uncultured_bacterium{species}(98)	Bacteria	Chloroflexi	Chloroflexia	Kallotenuales	Kallotenuaceae	Kallotenue	uncultured_bacterium
ASV984	0	0	0	9	2	0	0	0	0	34	20	19	0	40	22	79	0	225	Bacteria{superkingdom}(100);Proteobacteria{phylum}(100);Alphaproteobacteria{class}(100);Rhizobiales{order}(100);Methylobacteriaceae{family}(100);Microvirga{genus}(100);Unassigned{species}(0)	Bacteria	Proteobacteria	Alphaproteobacteria	Rhizobiales	Methylobacteriaceae	Microvirga	Unassigned
ASV985	210	0	71	120	86	0	0	0	0	0	0	0	0	0	0	0	0	487	Bacteria{superkingdom}(100);Proteobacteria{phylum}(100);Gammaproteobacteria{class}(100);Oceanospirillales{order}(100);{family}(100);{genus}(100);gamma_proteobacterium_Y-134{species}(100)	Bacteria	Proteobacteria	Gammaproteobacteria	Oceanospirillales			gamma_proteobacterium_Y-134
ASV986	12	11	0	0	626	0	0	0	0	0	0	0	0	18	0	0	0	667	Bacteria{superkingdom}(100);Chloroflexi{phylum}(100);{class}(100);{order}(100);{family}(100);{genus}(100);unidentified_marine_bacterioplankton{species}(100)	Bacteria	Chloroflexi					unidentified_marine_bacterioplankton
ASV987	0	0	0	0	52	0	43	0	0	0	0	0	62	0	0	0	0	157	Bacteria{superkingdom}(97);Acidobacteria{phylum}(97);Acidobacteria_Gp4{class}(97);{order}(97);{family}(97);Gp4{genus}(97);uncultured_Acidobacteriales_bacterium{species}(97)	Bacteria	Acidobacteria	Acidobacteria_Gp4			Gp4	uncultured_Acidobacteriales_bacterium
ASV988	0	22	43	40	0	105	129	156	103	0	0	22	165	74	0	0	64	923	Bacteria{superkingdom}(100);Acidobacteria{phylum}(100);Acidobacteria_Gp6{class}(100);{order}(100);{family}(100);Gp6{genus}(100);Unassigned{species}(0)	Bacteria	Acidobacteria	Acidobacteria_Gp6			Gp6	Unassigned
ASV989	0	108	26	45	0	17	28	45	0	0	0	51	98	27	103	0	80	628	Bacteria{superkingdom}(91);Proteobacteria{phylum}(91);Betaproteobacteria{class}(91);Burkholderiales{order}(91);Comamonadaceae{family}(91);Ramlibacter{genus}(91);Unassigned{species}(0)	Bacteria	Proteobacteria	Betaproteobacteria	Burkholderiales	Comamonadaceae	Ramlibacter	Unassigned
ASV990	37	0	44	23	274	67	26	0	0	22	0	0	0	16	10	19	14	552	Bacteria{superkingdom}(100);Proteobacteria{phylum}(100);Alphaproteobacteria{class}(100);Caulobacterales{order}(100);Caulobacteraceae{family}(100);Brevundimonas{genus}(100);Unassigned{species}(0)	Bacteria	Proteobacteria	Alphaproteobacteria	Caulobacterales	Caulobacteraceae	Brevundimonas	Unassigned
ASV991	79	0	20	0	115	0	0	0	12	18	0	20	60	6	0	49	0	379	Bacteria{superkingdom}(86);Proteobacteria{phylum}(86);Alphaproteobacteria{class}(86);Rhodospirillales{order}(86);{family}(86);{genus}(86);uncultured_Rhodospirillales_bacterium{species}(86)	Bacteria	Proteobacteria	Alphaproteobacteria	Rhodospirillales			uncultured_Rhodospirillales_bacterium
ASV992	62	37	23	32	55	31	77	34	40	98	66	0	0	0	0	0	31	586	Bacteria{superkingdom}(100);Armatimonadetes{phylum}(100);Chthonomonadetes{class}(100);Chthonomonadales{order}(100);Chthonomonadaceae{family}(100);Chthonomonas/Armatimonadetes_gp3{genus}(100);Unassigned{species}(0)	Bacteria	Armatimonadetes	Chthonomonadetes	Chthonomonadales	Chthonomonadaceae	Chthonomonas/Armatimonadetes_gp3	Unassigned
ASV993	0	0	0	0	0	0	0	0	0	0	0	0	0	120	0	0	0	120	Bacteria{superkingdom}(100);Chloroflexi{phylum}(100);Chloroflexia{class}(100);Kallotenuales{order}(100);Kallotenuaceae{family}(100);Kallotenue{genus}(100);Unassigned{species}(0)	Bacteria	Chloroflexi	Chloroflexia	Kallotenuales	Kallotenuaceae	Kallotenue	Unassigned
ASV994	0	0	0	0	0	117	0	0	0	0	0	0	0	0	0	0	0	117	Bacteria{superkingdom}(100);Actinobacteria{phylum}(100);Actinobacteria{class}(100);Actinomycetales{order}(100);Streptosporangiaceae{family}(100);Nonomuraea{genus}(100);Unassigned{species}(0)	Bacteria	Actinobacteria	Actinobacteria	Actinomycetales	Streptosporangiaceae	Nonomuraea	Unassigned
ASV995	0	0	0	14	0	136	0	0	0	0	0	0	0	0	0	0	0	150	Bacteria{superkingdom}(98);Actinobacteria{phylum}(98);Actinobacteria{class}(98);Solirubrobacterales{order}(98);Conexibacteraceae{family}(98);Conexibacter{genus}(98);uncultured_Rubrobacteraceae_bacterium{species}(98)	Bacteria	Actinobacteria	Actinobacteria	Solirubrobacterales	Conexibacteraceae	Conexibacter	uncultured_Rubrobacteraceae_bacterium
ASV996	35	34	115	31	55	49	0	30	35	10	0	0	0	0	0	0	18	412	Bacteria{superkingdom}(90);{phylum}(90);{class}(90);{order}(90);{family}(90);{genus}(90);uncultured_Actinomyces_sp.{species}(90)	Bacteria						uncultured_Actinomyces_sp.
ASV999	141	0	56	75	79	60	11	0	0	0	0	0	0	0	0	0	12	434	Bacteria{superkingdom}(100);Acidobacteria{phylum}(100);Acidobacteria_Gp6{class}(100);{order}(100);{family}(100);Gp6{genus}(100);Unassigned{species}(0)	Bacteria	Acidobacteria	Acidobacteria_Gp6			Gp6	Unassigned
ASV1002	59	0	27	0	103	47	0	0	26	0	0	0	0	0	0	0	0	262	Bacteria{superkingdom}(98);Planctomycetes{phylum}(98);Planctomycetia{class}(98);Planctomycetales{order}(98);Planctomycetaceae{family}(98);Blastopirellula{genus}(98);uncultured_bacterium{species}(98)	Bacteria	Planctomycetes	Planctomycetia	Planctomycetales	Planctomycetaceae	Blastopirellula	uncultured_bacterium
ASV1003	2	0	48	238	0	61	0	0	0	0	0	0	0	0	0	0	0	349	Bacteria{superkingdom}(100);Bacteroidetes{phylum}(100);Cytophagia{class}(100);Cytophagales{order}(100);{family}(100);Ohtaekwangia{genus}(100);Unassigned{species}(0)	Bacteria	Bacteroidetes	Cytophagia	Cytophagales		Ohtaekwangia	Unassigned
ASV1004	40	0	25	0	0	61	19	0	28	0	21	14	4	6	21	0	17	256	Bacteria{superkingdom}(100);Chloroflexi{phylum}(100);Chloroflexia{class}(100);{order}(100);{family}(100);{genus}(100);uncultured_bacterium{species}(100)	Bacteria	Chloroflexi	Chloroflexia				uncultured_bacterium
ASV1005	0	0	0	0	292	0	41	0	0	0	0	0	0	0	0	0	0	333	Bacteria{superkingdom}(87);Planctomycetes{phylum}(87);Planctomycetia{class}(87);Planctomycetales{order}(87);Planctomycetaceae{family}(87);Blastopirellula{genus}(87);uncultured_bacterium{species}(87)	Bacteria	Planctomycetes	Planctomycetia	Planctomycetales	Planctomycetaceae	Blastopirellula	uncultured_bacterium
ASV1006	35	0	0	391	431	537	0	0	0	0	15	0	0	0	0	0	0	1409	Bacteria{superkingdom}(100);Acidobacteria{phylum}(100);Acidobacteria_Gp7{class}(100);{order}(100);{family}(100);Gp7{genus}(100);Unassigned{species}(0)	Bacteria	Acidobacteria	Acidobacteria_Gp7			Gp7	Unassigned
ASV1008	58	49	22	14	0	0	111	143	113	74	38	35	48	10	0	10	42	767	Bacteria{superkingdom}(94);Chloroflexi{phylum}(94);{class}(94);{order}(94);{family}(94);{genus}(94);bacterium_Ellin6543{species}(94)	Bacteria	Chloroflexi					bacterium_Ellin6543
ASV1009	36	67	23	58	103	12	0	0	0	14	0	11	0	10	0	10	0	344	Bacteria{superkingdom}(100);Proteobacteria{phylum}(100);Deltaproteobacteria{class}(100);Myxococcales{order}(100);Unassigned{family}(0);Unassigned{genus}(0);Unassigned{species}(0)	Bacteria	Proteobacteria	Deltaproteobacteria	Myxococcales	Unassigned	Unassigned	Unassigned
ASV1010	27	13	5	14	0	60	38	40	32	30	27	13	74	0	0	0	16	389	Bacteria{superkingdom}(100);Acidobacteria{phylum}(100);Acidobacteria_Gp5{class}(100);{order}(100);{family}(100);Gp5{genus}(100);Unassigned{species}(0)	Bacteria	Acidobacteria	Acidobacteria_Gp5			Gp5	Unassigned
ASV1011	0	60	0	26	48	12	23	0	0	19	0	0	0	79	0	0	9	276	Bacteria{superkingdom}(99);Proteobacteria{phylum}(99);Deltaproteobacteria{class}(99);Myxococcales{order}(99);Polyangiaceae{family}(99);{genus}(99);Unassigned{species}(0)	Bacteria	Proteobacteria	Deltaproteobacteria	Myxococcales	Polyangiaceae		Unassigned
ASV1012	0	0	0	48	0	0	42	131	77	83	0	330	0	129	0	0	83	923	Bacteria{superkingdom}(100);{phylum}(100);{class}(100);{order}(100);{family}(100);{genus}(100);uncultured_Actinomyces_sp.{species}(100)	Bacteria						uncultured_Actinomyces_sp.
ASV1013	58	0	66	26	32	20	48	27	18	64	26	15	0	0	44	0	7	451	Bacteria{superkingdom}(100);Actinobacteria{phylum}(100);Actinobacteria{class}(100);Gaiellales{order}(100);Gaiellaceae{family}(100);Gaiella{genus}(100);Unassigned{species}(0)	Bacteria	Actinobacteria	Actinobacteria	Gaiellales	Gaiellaceae	Gaiella	Unassigned
ASV1014	0	0	9	24	0	0	0	15	0	0	26	28	197	281	179	114	84	957	Bacteria{superkingdom}(94);Actinobacteria{phylum}(94);{class}(94);{order}(94);{family}(94);{genus}(94);uncultured_soil_bacterium{species}(94)	Bacteria	Actinobacteria					uncultured_soil_bacterium
ASV1015	0	277	4	21	0	7	0	0	0	60	30	0	33	15	121	0	134	702	Bacteria{superkingdom}(87);Bacteroidetes{phylum}(87);Cytophagia{class}(87);Cytophagales{order}(87);{family}(87);Ohtaekwangia{genus}(87);uncultured_Bacteroidetes_bacterium{species}(87)	Bacteria	Bacteroidetes	Cytophagia	Cytophagales		Ohtaekwangia	uncultured_Bacteroidetes_bacterium
ASV1016	14	65	7	11	0	0	36	21	0	22	17	117	38	98	135	248	414	1243	Bacteria{superkingdom}(90);Proteobacteria{phylum}(90);Alphaproteobacteria{class}(90);Sphingomonadales{order}(90);Sphingomonadaceae{family}(90);Novosphingobium{genus}(90);Unassigned{species}(0)	Bacteria	Proteobacteria	Alphaproteobacteria	Sphingomonadales	Sphingomonadaceae	Novosphingobium	Unassigned
ASV1017	0	0	0	253	25	0	0	0	0	0	0	0	0	0	0	0	5	283	Bacteria{superkingdom}(88);Bacteroidetes{phylum}(88);Sphingobacteriia{class}(88);Sphingobacteriales{order}(88);Chitinophagaceae{family}(88);{genus}(88);uncultured_Chitinophagaceae_bacterium{species}(88)	Bacteria	Bacteroidetes	Sphingobacteriia	Sphingobacteriales	Chitinophagaceae		uncultured_Chitinophagaceae_bacterium
ASV1018	0	27	0	0	0	8	0	0	0	0	0	0	0	0	0	0	0	35	Bacteria{superkingdom}(81);Actinobacteria{phylum}(81);Actinobacteria{class}(81);Actinomycetales{order}(81);Nocardioidaceae{family}(81);Marmoricola{genus}(81);Unassigned{species}(0)	Bacteria	Actinobacteria	Actinobacteria	Actinomycetales	Nocardioidaceae	Marmoricola	Unassigned
ASV1019	0	0	55	55	0	65	0	57	46	47	0	49	0	15	0	0	122	511	Bacteria{superkingdom}(100);Actinobacteria{phylum}(100);Unassigned{class}(0);Unassigned{order}(0);Unassigned{family}(0);Unassigned{genus}(0);Unassigned{species}(0)	Bacteria	Actinobacteria	Unassigned	Unassigned	Unassigned	Unassigned	Unassigned
ASV1020	36	0	45	7	76	0	28	0	156	37	0	31	13	21	16	53	219	738	Bacteria{superkingdom}(88);Proteobacteria{phylum}(88);Alphaproteobacteria{class}(88);Sphingomonadales{order}(88);Sphingomonadaceae{family}(88);Sphingosinicella{genus}(88);Unassigned{species}(0)	Bacteria	Proteobacteria	Alphaproteobacteria	Sphingomonadales	Sphingomonadaceae	Sphingosinicella	Unassigned
ASV1021	50	29	18	82	64	87	0	0	0	15	0	15	0	0	0	0	0	360	Bacteria{superkingdom}(100);Gemmatimonadetes{phylum}(100);Gemmatimonadetes{class}(100);Gemmatimonadales{order}(100);Gemmatimonadaceae{family}(100);Gemmatimonas{genus}(100);uncultured_Pelobacter_sp.{species}(100)	Bacteria	Gemmatimonadetes	Gemmatimonadetes	Gemmatimonadales	Gemmatimonadaceae	Gemmatimonas	uncultured_Pelobacter_sp.
ASV1022	0	42	0	0	0	0	0	0	0	0	0	12	0	0	21	46	0	121	Bacteria{superkingdom}(100);Actinobacteria{phylum}(100);Actinobacteria{class}(100);Actinomycetales{order}(100);Micromonosporaceae{family}(100);Unassigned{genus}(0);Unassigned{species}(0)	Bacteria	Actinobacteria	Actinobacteria	Actinomycetales	Micromonosporaceae	Unassigned	Unassigned
ASV1023	47	0	15	29	81	108	0	0	0	0	0	0	0	0	0	16	7	303	Bacteria{superkingdom}(98);Planctomycetes{phylum}(98);Planctomycetia{class}(98);Planctomycetales{order}(98);Planctomycetaceae{family}(98);Pirellula{genus}(98);uncultured_soil_bacterium{species}(98)	Bacteria	Planctomycetes	Planctomycetia	Planctomycetales	Planctomycetaceae	Pirellula	uncultured_soil_bacterium
ASV1024	0	19	0	9	0	0	0	0	0	0	0	25	30	77	152	366	62	740	Bacteria{superkingdom}(100);Actinobacteria{phylum}(100);Actinobacteria{class}(100);Actinomycetales{order}(100);Microbacteriaceae{family}(100);Unassigned{genus}(0);Unassigned{species}(0)	Bacteria	Actinobacteria	Actinobacteria	Actinomycetales	Microbacteriaceae	Unassigned	Unassigned
ASV1025	36	0	0	0	211	137	0	0	3	16	0	7	0	0	0	0	0	410	Bacteria{superkingdom}(97);Chloroflexi{phylum}(97);Anaerolineae{class}(97);Anaerolineales{order}(97);Anaerolineaceae{family}(97);{genus}(97);Unassigned{species}(0)	Bacteria	Chloroflexi	Anaerolineae	Anaerolineales	Anaerolineaceae		Unassigned
ASV1026	11	0	10	12	27	31	0	0	0	0	0	0	23	0	0	0	2	116	Bacteria{superkingdom}(99);Proteobacteria{phylum}(99);Deltaproteobacteria{class}(99);Bdellovibrionales{order}(99);Bdellovibrionaceae{family}(99);Vampirovibrio{genus}(99);uncultured_bacterium{species}(99)	Bacteria	Proteobacteria	Deltaproteobacteria	Bdellovibrionales	Bdellovibrionaceae	Vampirovibrio	uncultured_bacterium
ASV1027	33	0	68	0	71	70	34	0	21	0	0	101	0	15	12	16	0	441	Bacteria{superkingdom}(99);Actinobacteria{phylum}(99);Actinobacteria{class}(99);Actinomycetales{order}(99);Nocardioidaceae{family}(99);Marmoricola{genus}(99);Unassigned{species}(0)	Bacteria	Actinobacteria	Actinobacteria	Actinomycetales	Nocardioidaceae	Marmoricola	Unassigned
ASV1028	0	0	0	0	0	0	0	0	0	0	0	28	0	34	52	41	0	155	Bacteria{superkingdom}(98);Proteobacteria{phylum}(98);Betaproteobacteria{class}(98);Burkholderiales{order}(98);Oxalobacteraceae{family}(98);Noviherbaspirillum{genus}(98);Unassigned{species}(0)	Bacteria	Proteobacteria	Betaproteobacteria	Burkholderiales	Oxalobacteraceae	Noviherbaspirillum	Unassigned
ASV1029	0	0	0	0	0	0	0	0	401	0	0	8	62	0	0	0	137	608	Bacteria{superkingdom}(97);Actinobacteria{phylum}(97);Actinobacteria{class}(97);Solirubrobacterales{order}(97);Unassigned{family}(0);Unassigned{genus}(0);Unassigned{species}(0)	Bacteria	Actinobacteria	Actinobacteria	Solirubrobacterales	Unassigned	Unassigned	Unassigned
ASV1030	16	0	22	0	67	46	113	5	7	0	15	0	7	0	0	0	0	298	Bacteria{superkingdom}(99);Chloroflexi{phylum}(99);Unassigned{class}(0);Unassigned{order}(0);Unassigned{family}(0);Unassigned{genus}(0);Unassigned{species}(0)	Bacteria	Chloroflexi	Unassigned	Unassigned	Unassigned	Unassigned	Unassigned
ASV1031	46	0	54	0	52	97	58	0	0	0	0	0	0	0	0	0	0	307	Bacteria{superkingdom}(100);Acidobacteria{phylum}(100);Acidobacteria_Gp6{class}(100);{order}(100);{family}(100);Gp6{genus}(100);Unassigned{species}(0)	Bacteria	Acidobacteria	Acidobacteria_Gp6			Gp6	Unassigned
ASV1032	36	19	10	18	36	46	33	63	38	34	39	20	81	55	103	53	52	736	Bacteria{superkingdom}(99);Chloroflexi{phylum}(99);{class}(99);{order}(99);{family}(99);{genus}(99);uncultured_Firmicutes_bacterium{species}(99)	Bacteria	Chloroflexi					uncultured_Firmicutes_bacterium
ASV1033	0	0	84	55	0	270	0	0	0	0	0	0	0	0	0	0	0	409	Bacteria{superkingdom}(84);Bacteroidetes{phylum}(84);Sphingobacteriia{class}(84);Sphingobacteriales{order}(84);Chitinophagaceae{family}(84);{genus}(84);uncultured_Cytophaga_sp.{species}(84)	Bacteria	Bacteroidetes	Sphingobacteriia	Sphingobacteriales	Chitinophagaceae		uncultured_Cytophaga_sp.
ASV1034	19	142	0	0	0	0	0	0	17	44	35	55	95	109	0	0	0	516	Bacteria{superkingdom}(95);Actinobacteria{phylum}(95);Actinobacteria{class}(95);Acidimicrobiales{order}(95);Acidimicrobineae_incertae_sedis{family}(95);Aciditerrimonas{genus}(95);Unassigned{species}(0)	Bacteria	Actinobacteria	Actinobacteria	Acidimicrobiales	Acidimicrobineae_incertae_sedis	Aciditerrimonas	Unassigned
ASV1035	0	0	0	37	0	0	0	0	0	0	0	0	0	230	0	0	0	267	Bacteria{superkingdom}(90);Actinobacteria{phylum}(90);Actinobacteria{class}(90);Actinomycetales{order}(90);Pseudonocardiaceae{family}(90);Actinophytocola{genus}(90);uncultured_bacterium{species}(90)	Bacteria	Actinobacteria	Actinobacteria	Actinomycetales	Pseudonocardiaceae	Actinophytocola	uncultured_bacterium
ASV1036	0	0	16	110	88	43	0	0	0	0	0	0	0	0	0	0	0	257	Bacteria{superkingdom}(100);Chloroflexi{phylum}(100);Anaerolineae{class}(100);Anaerolineales{order}(100);Anaerolineaceae{family}(100);{genus}(100);uncultured_Caldilineaceae_bacterium{species}(100)	Bacteria	Chloroflexi	Anaerolineae	Anaerolineales	Anaerolineaceae		uncultured_Caldilineaceae_bacterium
ASV1037	0	0	0	0	125	25	0	0	0	0	0	0	12	0	0	0	0	162	Bacteria{superkingdom}(81);Chloroflexi{phylum}(81);Anaerolineae{class}(81);Anaerolineales{order}(81);Anaerolineaceae{family}(81);{genus}(81);Unassigned{species}(0)	Bacteria	Chloroflexi	Anaerolineae	Anaerolineales	Anaerolineaceae		Unassigned
ASV1038	73	0	0	75	143	82	0	0	0	0	0	0	0	0	0	0	14	387	Bacteria{superkingdom}(88);Planctomycetes{phylum}(88);Planctomycetia{class}(88);Planctomycetales{order}(88);Planctomycetaceae{family}(88);Pirellula{genus}(88);uncultured_planctomycete{species}(88)	Bacteria	Planctomycetes	Planctomycetia	Planctomycetales	Planctomycetaceae	Pirellula	uncultured_planctomycete
ASV1039	40	0	31	318	83	267	0	0	29	0	0	0	249	0	0	0	0	1017	Bacteria{superkingdom}(100);Proteobacteria{phylum}(100);Deltaproteobacteria{class}(100);Myxococcales{order}(100);Cystobacteraceae{family}(100);Unassigned{genus}(0);Unassigned{species}(0)	Bacteria	Proteobacteria	Deltaproteobacteria	Myxococcales	Cystobacteraceae	Unassigned	Unassigned
ASV1040	0	0	0	6	0	0	0	0	7	6	12	19	0	0	22	0	0	72	Bacteria{superkingdom}(95);{phylum}(95);{class}(95);{order}(95);{family}(95);{genus}(95);uncultured_Malonomonas_sp.{species}(95)	Bacteria						uncultured_Malonomonas_sp.
ASV1041	12	22	16	38	41	46	12	0	7	0	0	0	0	0	0	14	9	217	Bacteria{superkingdom}(100);Proteobacteria{phylum}(100);Alphaproteobacteria{class}(100);Rhizobiales{order}(100);Unassigned{family}(0);Unassigned{genus}(0);Unassigned{species}(0)	Bacteria	Proteobacteria	Alphaproteobacteria	Rhizobiales	Unassigned	Unassigned	Unassigned
ASV1042	21	8	0	0	29	12	9	12	14	0	4	16	27	8	50	193	50	453	Bacteria{superkingdom}(87);Proteobacteria{phylum}(87);Gammaproteobacteria{class}(87);Xanthomonadales{order}(87);Sinobacteraceae{family}(87);Fontimonas{genus}(87);uncultured_bacterium{species}(87)	Bacteria	Proteobacteria	Gammaproteobacteria	Xanthomonadales	Sinobacteraceae	Fontimonas	uncultured_bacterium
ASV1044	0	0	0	0	27	0	0	0	0	0	0	0	0	0	0	0	0	27	Bacteria{superkingdom}(100);Bacteroidetes{phylum}(100);Flavobacteriia{class}(100);Flavobacteriales{order}(100);Flavobacteriaceae{family}(100);Flavobacterium{genus}(100);Unassigned{species}(0)	Bacteria	Bacteroidetes	Flavobacteriia	Flavobacteriales	Flavobacteriaceae	Flavobacterium	Unassigned
ASV1045	0	0	0	0	115	78	0	25	0	0	0	0	0	0	0	0	0	218	Bacteria{superkingdom}(100);Acidobacteria{phylum}(100);Acidobacteria_Gp6{class}(100);{order}(100);{family}(100);Gp6{genus}(100);Unassigned{species}(0)	Bacteria	Acidobacteria	Acidobacteria_Gp6			Gp6	Unassigned
ASV1046	0	0	0	0	0	0	0	0	0	0	0	0	0	0	27	0	0	27	Bacteria{superkingdom}(100);Bacteroidetes{phylum}(100);Sphingobacteriia{class}(100);Sphingobacteriales{order}(100);Chitinophagaceae{family}(100);Chitinophaga{genus}(100);Unassigned{species}(0)	Bacteria	Bacteroidetes	Sphingobacteriia	Sphingobacteriales	Chitinophagaceae	Chitinophaga	Unassigned
ASV1047	23	65	0	36	0	46	0	0	0	23	0	0	0	0	0	0	0	193	Bacteria{superkingdom}(100);Proteobacteria{phylum}(100);Deltaproteobacteria{class}(100);Myxococcales{order}(100);Unassigned{family}(0);Unassigned{genus}(0);Unassigned{species}(0)	Bacteria	Proteobacteria	Deltaproteobacteria	Myxococcales	Unassigned	Unassigned	Unassigned
ASV1050	27	0	21	42	181	0	0	0	48	53	12	49	26	39	62	37	12	609	Bacteria{superkingdom}(99);Chloroflexi{phylum}(99);Unassigned{class}(0);Unassigned{order}(0);Unassigned{family}(0);Unassigned{genus}(0);Unassigned{species}(0)	Bacteria	Chloroflexi	Unassigned	Unassigned	Unassigned	Unassigned	Unassigned
ASV1051	61	0	20	31	57	0	9	23	56	11	0	18	0	0	0	0	0	286	Bacteria{superkingdom}(100);Actinobacteria{phylum}(100);Actinobacteria{class}(100);Unassigned{order}(0);Unassigned{family}(0);Unassigned{genus}(0);Unassigned{species}(0)	Bacteria	Actinobacteria	Actinobacteria	Unassigned	Unassigned	Unassigned	Unassigned
ASV1052	0	0	0	0	0	0	0	0	0	0	0	82	0	0	0	0	0	82	Bacteria{superkingdom}(100);Bacteroidetes{phylum}(100);Flavobacteriia{class}(100);Flavobacteriales{order}(100);Flavobacteriaceae{family}(100);Chryseobacterium{genus}(100);Unassigned{species}(0)	Bacteria	Bacteroidetes	Flavobacteriia	Flavobacteriales	Flavobacteriaceae	Chryseobacterium	Unassigned
ASV1053	0	0	0	0	0	0	0	0	0	0	0	58	0	51	0	17	0	126	Bacteria{superkingdom}(100);Actinobacteria{phylum}(100);Actinobacteria{class}(100);Actinomycetales{order}(100);Streptomycetaceae{family}(100);Streptomyces{genus}(100);Unassigned{species}(0)	Bacteria	Actinobacteria	Actinobacteria	Actinomycetales	Streptomycetaceae	Streptomyces	Unassigned
ASV1054	6	10	16	39	14	25	0	0	0	1	0	0	0	0	0	0	0	111	Bacteria{superkingdom}(90);Actinobacteria{phylum}(90);Actinobacteria{class}(90);Actinomycetales{order}(90);Pseudonocardiaceae{family}(90);Actinophytocola{genus}(90);uncultured_bacterium{species}(90)	Bacteria	Actinobacteria	Actinobacteria	Actinomycetales	Pseudonocardiaceae	Actinophytocola	uncultured_bacterium
ASV1055	0	0	0	0	0	0	0	0	0	0	0	114	0	0	5	28	0	147	Bacteria{superkingdom}(88);Proteobacteria{phylum}(88);Betaproteobacteria{class}(88);Burkholderiales{order}(88);Oxalobacteraceae{family}(88);Massilia{genus}(88);Massilia_dura{species}(88)	Bacteria	Proteobacteria	Betaproteobacteria	Burkholderiales	Oxalobacteraceae	Massilia	Massilia_dura
ASV1056	164	54	78	169	74	40	47	0	0	0	0	0	0	0	0	0	0	626	Bacteria{superkingdom}(100);Acidobacteria{phylum}(100);Acidobacteria_Gp6{class}(100);{order}(100);{family}(100);Gp6{genus}(100);Unassigned{species}(0)	Bacteria	Acidobacteria	Acidobacteria_Gp6			Gp6	Unassigned
ASV1057	36	0	0	0	0	82	0	0	0	0	0	0	32	0	0	23	0	173	Bacteria{superkingdom}(82);Actinobacteria{phylum}(82);Actinobacteria{class}(82);Solirubrobacterales{order}(82);{family}(82);{genus}(82);Unassigned{species}(0)	Bacteria	Actinobacteria	Actinobacteria	Solirubrobacterales			Unassigned
ASV1058	0	0	0	0	0	0	0	51	0	0	0	0	0	0	0	0	0	51	Bacteria{superkingdom}(100);Proteobacteria{phylum}(100);Betaproteobacteria{class}(100);{order}(100);{family}(100);{genus}(100);Unassigned{species}(0)	Bacteria	Proteobacteria	Betaproteobacteria				Unassigned
ASV1059	37	39	0	77	0	0	8	10	4	67	7	56	0	15	51	23	4	398	Bacteria{superkingdom}(99);Chloroflexi{phylum}(99);Thermomicrobia{class}(99);Sphaerobacterales{order}(99);Sphaerobacteraceae{family}(99);Unassigned{genus}(0);Unassigned{species}(0)	Bacteria	Chloroflexi	Thermomicrobia	Sphaerobacterales	Sphaerobacteraceae	Unassigned	Unassigned
ASV1060	18	0	0	0	145	0	0	0	0	11	0	0	0	0	0	0	0	174	Bacteria{superkingdom}(98);Proteobacteria{phylum}(98);Gammaproteobacteria{class}(98);{order}(98);{family}(98);{genus}(98);uncultured_Saccharophagus_sp.{species}(98)	Bacteria	Proteobacteria	Gammaproteobacteria				uncultured_Saccharophagus_sp.
ASV1061	0	0	0	0	0	0	0	0	0	0	0	70	0	9	24	0	0	103	Bacteria{superkingdom}(99);Proteobacteria{phylum}(99);Alphaproteobacteria{class}(99);Rhodobacterales{order}(99);Rhodobacteraceae{family}(99);Paracoccus{genus}(99);Unassigned{species}(0)	Bacteria	Proteobacteria	Alphaproteobacteria	Rhodobacterales	Rhodobacteraceae	Paracoccus	Unassigned
ASV1062	0	32	0	62	1934	0	0	0	40	0	0	0	0	0	0	0	0	2068	Bacteria{superkingdom}(100);Bacteroidetes{phylum}(100);Sphingobacteriia{class}(100);Sphingobacteriales{order}(100);Sphingobacteriaceae{family}(100);Pedobacter{genus}(100);Unassigned{species}(0)	Bacteria	Bacteroidetes	Sphingobacteriia	Sphingobacteriales	Sphingobacteriaceae	Pedobacter	Unassigned
ASV1064	0	0	0	0	0	0	0	0	590	21	0	23	0	176	209	75	89	1183	Bacteria{superkingdom}(100);Bacteroidetes{phylum}(100);Sphingobacteriia{class}(100);Sphingobacteriales{order}(100);Chitinophagaceae{family}(100);Unassigned{genus}(0);Unassigned{species}(0)	Bacteria	Bacteroidetes	Sphingobacteriia	Sphingobacteriales	Chitinophagaceae	Unassigned	Unassigned
ASV1066	21	0	39	0	55	33	27	13	14	0	0	131	0	0	0	0	0	333	Bacteria{superkingdom}(90);Gemmatimonadetes{phylum}(90);Gemmatimonadetes{class}(90);Gemmatimonadales{order}(90);Gemmatimonadaceae{family}(90);Gemmatimonas{genus}(90);uncultured_Gemmatimonadales_bacterium{species}(90)	Bacteria	Gemmatimonadetes	Gemmatimonadetes	Gemmatimonadales	Gemmatimonadaceae	Gemmatimonas	uncultured_Gemmatimonadales_bacterium
ASV1067	0	0	0	11	173	47	0	0	0	0	0	0	0	0	0	0	0	231	Bacteria{superkingdom}(100);Bacteroidetes{phylum}(100);Sphingobacteriia{class}(100);Sphingobacteriales{order}(100);Chitinophagaceae{family}(100);{genus}(100);Unassigned{species}(0)	Bacteria	Bacteroidetes	Sphingobacteriia	Sphingobacteriales	Chitinophagaceae		Unassigned
ASV1068	40	0	0	0	0	146	0	0	0	0	0	0	0	0	0	0	0	186	Bacteria{superkingdom}(83);Planctomycetes{phylum}(83);Planctomycetia{class}(83);Planctomycetales{order}(83);Planctomycetaceae{family}(83);Blastopirellula{genus}(83);Unassigned{species}(0)	Bacteria	Planctomycetes	Planctomycetia	Planctomycetales	Planctomycetaceae	Blastopirellula	Unassigned
ASV1069	0	0	0	0	0	0	0	0	0	0	0	13	0	6	16	0	0	35	Bacteria{superkingdom}(100);Proteobacteria{phylum}(100);Alphaproteobacteria{class}(100);Rhizobiales{order}(100);Hyphomicrobiaceae{family}(100);Devosia{genus}(100);Unassigned{species}(0)	Bacteria	Proteobacteria	Alphaproteobacteria	Rhizobiales	Hyphomicrobiaceae	Devosia	Unassigned
ASV1070	0	53	19	0	0	0	84	57	55	46	0	46	66	42	113	62	0	643	Bacteria{superkingdom}(100);Acidobacteria{phylum}(100);Acidobacteria_Gp6{class}(100);{order}(100);{family}(100);Gp6{genus}(100);Unassigned{species}(0)	Bacteria	Acidobacteria	Acidobacteria_Gp6			Gp6	Unassigned
ASV1071	15	0	0	35	0	32	0	0	0	0	0	0	0	0	0	0	0	82	Bacteria{superkingdom}(100);Acidobacteria{phylum}(100);Acidobacteria_Gp10{class}(100);{order}(100);{family}(100);Gp10{genus}(100);Unassigned{species}(0)	Bacteria	Acidobacteria	Acidobacteria_Gp10			Gp10	Unassigned
ASV1072	0	0	0	0	0	15	0	0	0	0	0	0	0	0	0	0	0	15	Bacteria{superkingdom}(91);Proteobacteria{phylum}(91);Alphaproteobacteria{class}(91);Rhizobiales{order}(91);{family}(91);{genus}(91);Unassigned{species}(0)	Bacteria	Proteobacteria	Alphaproteobacteria	Rhizobiales			Unassigned
ASV1073	27	14	22	28	133	84	0	0	0	0	0	0	0	0	0	0	0	308	Bacteria{superkingdom}(94);Verrucomicrobia{phylum}(94);Subdivision3{class}(94);{order}(94);{family}(94);Subdivision3_genera_incertae_sedis{genus}(94);uncultured_Moorella_sp.{species}(94)	Bacteria	Verrucomicrobia	Subdivision3			Subdivision3_genera_incertae_sedis	uncultured_Moorella_sp.
ASV1074	27	0	0	0	0	53	0	0	0	29	0	15	0	11	12	0	0	147	Bacteria{superkingdom}(100);Proteobacteria{phylum}(100);Betaproteobacteria{class}(100);Burkholderiales{order}(100);Burkholderiaceae{family}(100);Cupriavidus{genus}(100);Unassigned{species}(0)	Bacteria	Proteobacteria	Betaproteobacteria	Burkholderiales	Burkholderiaceae	Cupriavidus	Unassigned
ASV1075	119	178	89	0	0	78	0	0	0	0	0	0	0	0	0	0	0	464	Bacteria{superkingdom}(100);Gemmatimonadetes{phylum}(100);Gemmatimonadetes{class}(100);Gemmatimonadales{order}(100);Gemmatimonadaceae{family}(100);Gemmatimonas{genus}(100);Unassigned{species}(0)	Bacteria	Gemmatimonadetes	Gemmatimonadetes	Gemmatimonadales	Gemmatimonadaceae	Gemmatimonas	Unassigned
ASV1076	119	84	55	0	155	44	74	107	82	14	0	0	0	0	0	0	7	741	Bacteria{superkingdom}(100);Chloroflexi{phylum}(100);Chloroflexia{class}(100);{order}(100);{family}(100);{genus}(100);uncultured_bacterium{species}(100)	Bacteria	Chloroflexi	Chloroflexia				uncultured_bacterium
ASV1077	28	0	32	42	0	42	0	48	0	36	0	50	19	0	15	0	5	317	Bacteria{superkingdom}(98);Firmicutes{phylum}(98);Bacilli{class}(98);Bacillales{order}(98);Paenibacillaceae_1{family}(98);Paenibacillus{genus}(98);Unassigned{species}(0)	Bacteria	Firmicutes	Bacilli	Bacillales	Paenibacillaceae_1	Paenibacillus	Unassigned
ASV1078	0	0	47	0	45	0	0	0	0	0	0	0	0	0	0	8	0	100	Bacteria{superkingdom}(100);Chloroflexi{phylum}(100);{class}(100);{order}(100);{family}(100);{genus}(100);uncultured_sludge_bacterium_S14{species}(100)	Bacteria	Chloroflexi					uncultured_sludge_bacterium_S14
ASV1080	16	0	20	21	0	19	39	0	0	70	158	0	53	20	137	44	16	613	Bacteria{superkingdom}(100);Bacteroidetes{phylum}(100);Sphingobacteriia{class}(100);Sphingobacteriales{order}(100);Chitinophagaceae{family}(100);Unassigned{genus}(0);Unassigned{species}(0)	Bacteria	Bacteroidetes	Sphingobacteriia	Sphingobacteriales	Chitinophagaceae	Unassigned	Unassigned
ASV1081	23	0	49	50	125	61	10	0	7	20	0	0	0	15	34	0	18	412	Bacteria{superkingdom}(92);Armatimonadetes{phylum}(92);{class}(92);{order}(92);{family}(92);Armatimonadetes_gp4{genus}(92);uncultured_bacterium{species}(92)	Bacteria	Armatimonadetes				Armatimonadetes_gp4	uncultured_bacterium
ASV1082	15	0	0	0	0	24	0	0	4	0	0	0	0	0	0	0	0	43	Bacteria{superkingdom}(98);Chloroflexi{phylum}(98);Caldilineae{class}(98);Caldilineales{order}(98);Caldilineaceae{family}(98);Litorilinea{genus}(98);uncultured_Rubrobacter_sp.{species}(98)	Bacteria	Chloroflexi	Caldilineae	Caldilineales	Caldilineaceae	Litorilinea	uncultured_Rubrobacter_sp.
ASV1083	0	0	46	86	93	0	124	0	0	0	75	87	81	0	0	0	24	616	Bacteria{superkingdom}(90);Firmicutes{phylum}(90);Bacilli{class}(90);Bacillales{order}(90);Bacillaceae_1{family}(90);Bacillus{genus}(90);Bacillus_funiculus{species}(90)	Bacteria	Firmicutes	Bacilli	Bacillales	Bacillaceae_1	Bacillus	Bacillus_funiculus
ASV1084	0	0	0	0	0	0	0	0	0	0	0	0	0	25	29	20	17	91	Bacteria{superkingdom}(100);Actinobacteria{phylum}(100);Actinobacteria{class}(100);Actinomycetales{order}(100);Unassigned{family}(0);Unassigned{genus}(0);Unassigned{species}(0)	Bacteria	Actinobacteria	Actinobacteria	Actinomycetales	Unassigned	Unassigned	Unassigned
ASV1085	32	39	41	18	0	61	10	67	28	25	59	31	237	24	0	14	14	700	Bacteria{superkingdom}(99);Armatimonadetes{phylum}(99);{class}(99);{order}(99);{family}(99);Armatimonadetes_gp4{genus}(99);uncultured_Firmicutes_bacterium{species}(99)	Bacteria	Armatimonadetes				Armatimonadetes_gp4	uncultured_Firmicutes_bacterium
ASV1086	19	0	0	0	0	94	0	0	0	10	0	0	0	0	0	45	0	168	Bacteria{superkingdom}(100);Acidobacteria{phylum}(100);Acidobacteria_Gp4{class}(100);{order}(100);{family}(100);Gp4{genus}(100);Unassigned{species}(0)	Bacteria	Acidobacteria	Acidobacteria_Gp4			Gp4	Unassigned
ASV1087	25	0	0	0	0	0	77	87	59	183	127	50	38	56	0	31	50	783	Bacteria{superkingdom}(98);Chloroflexi{phylum}(98);Chloroflexia{class}(98);{order}(98);{family}(98);{genus}(98);uncultured_bacterium{species}(98)	Bacteria	Chloroflexi	Chloroflexia				uncultured_bacterium
ASV1088	31	343	60	10	143	15	134	0	200	0	47	11	0	0	0	0	6	1000	Bacteria{superkingdom}(99);Proteobacteria{phylum}(99);Betaproteobacteria{class}(99);{order}(99);{family}(99);{genus}(99);Unassigned{species}(0)	Bacteria	Proteobacteria	Betaproteobacteria				Unassigned
ASV1089	27	32	0	29	71	44	0	13	0	26	0	0	43	58	34	24	38	439	Bacteria{superkingdom}(100);Planctomycetes{phylum}(100);Planctomycetia{class}(100);Planctomycetales{order}(100);Planctomycetaceae{family}(100);{genus}(100);uncultured_Planctomyces_sp.{species}(100)	Bacteria	Planctomycetes	Planctomycetia	Planctomycetales	Planctomycetaceae		uncultured_Planctomyces_sp.
ASV1090	50	0	27	101	0	0	0	58	0	54	0	58	0	0	88	0	0	436	Bacteria{superkingdom}(92);Actinobacteria{phylum}(92);Actinobacteria{class}(92);Actinomycetales{order}(92);Nocardioidaceae{family}(92);Marmoricola{genus}(92);Unassigned{species}(0)	Bacteria	Actinobacteria	Actinobacteria	Actinomycetales	Nocardioidaceae	Marmoricola	Unassigned
ASV1091	0	0	0	0	0	0	0	0	0	0	0	0	0	0	1762	0	0	1762	Bacteria{superkingdom}(100);Bacteroidetes{phylum}(100);Sphingobacteriia{class}(100);Sphingobacteriales{order}(100);Chitinophagaceae{family}(100);Unassigned{genus}(0);Unassigned{species}(0)	Bacteria	Bacteroidetes	Sphingobacteriia	Sphingobacteriales	Chitinophagaceae	Unassigned	Unassigned
ASV1092	11	26	0	3	0	0	0	0	0	0	0	0	0	0	0	0	0	40	Bacteria{superkingdom}(99);Proteobacteria{phylum}(99);Betaproteobacteria{class}(99);Burkholderiales{order}(99);{family}(99);{genus}(99);Unassigned{species}(0)	Bacteria	Proteobacteria	Betaproteobacteria	Burkholderiales			Unassigned
ASV1093	40	0	32	14	69	12	53	61	44	46	72	8	0	0	0	0	0	451	Bacteria{superkingdom}(99);Gemmatimonadetes{phylum}(99);Gemmatimonadetes{class}(99);Gemmatimonadales{order}(99);Gemmatimonadaceae{family}(99);Gemmatimonas{genus}(99);uncultured_prokaryote{species}(99)	Bacteria	Gemmatimonadetes	Gemmatimonadetes	Gemmatimonadales	Gemmatimonadaceae	Gemmatimonas	uncultured_prokaryote
ASV1094	0	0	0	0	41	0	26	0	16	0	0	0	0	0	0	0	479	562	Bacteria{superkingdom}(100);Chloroflexi{phylum}(100);Chloroflexia{class}(100);{order}(100);{family}(100);{genus}(100);uncultured_Herpetosiphon_sp.{species}(100)	Bacteria	Chloroflexi	Chloroflexia				uncultured_Herpetosiphon_sp.
ASV1095	0	0	54	0	76	0	0	0	0	0	0	0	0	0	0	0	0	130	Bacteria{superkingdom}(97);Proteobacteria{phylum}(97);Alphaproteobacteria{class}(97);Sphingomonadales{order}(97);Sphingomonadaceae{family}(97);Novosphingobium{genus}(97);Unassigned{species}(0)	Bacteria	Proteobacteria	Alphaproteobacteria	Sphingomonadales	Sphingomonadaceae	Novosphingobium	Unassigned
ASV1096	35	479	0	88	0	0	0	42	80	101	0	123	0	0	0	32	0	980	Bacteria{superkingdom}(99);Acidobacteria{phylum}(99);Acidobacteria_Gp16{class}(99);{order}(99);{family}(99);Gp16{genus}(99);uncultured_bacterium{species}(99)	Bacteria	Acidobacteria	Acidobacteria_Gp16			Gp16	uncultured_bacterium
ASV1097	11	32	0	0	16	29	0	0	74	0	0	0	0	0	0	0	18	180	Bacteria{superkingdom}(100);Proteobacteria{phylum}(100);Deltaproteobacteria{class}(100);Myxococcales{order}(100);Kofleriaceae{family}(100);Kofleria{genus}(100);uncultured_soil_bacterium{species}(100)	Bacteria	Proteobacteria	Deltaproteobacteria	Myxococcales	Kofleriaceae	Kofleria	uncultured_soil_bacterium
ASV1098	51	81	10	9	0	0	19	9	10	22	0	33	0	0	0	13	0	257	Bacteria{superkingdom}(100);Actinobacteria{phylum}(100);Actinobacteria{class}(100);Rubrobacterales{order}(100);Rubrobacteraceae{family}(100);Rubrobacter{genus}(100);Unassigned{species}(0)	Bacteria	Actinobacteria	Actinobacteria	Rubrobacterales	Rubrobacteraceae	Rubrobacter	Unassigned
ASV1099	0	0	14	0	0	39	17	0	0	0	0	0	52	0	47	0	38	207	Bacteria{superkingdom}(97);Chloroflexi{phylum}(97);{class}(97);{order}(97);{family}(97);{genus}(97);uncultured_Firmicutes_bacterium{species}(97)	Bacteria	Chloroflexi					uncultured_Firmicutes_bacterium
ASV1101	0	47	0	0	0	0	0	0	0	0	12	34	0	0	0	0	0	93	Bacteria{superkingdom}(98);Armatimonadetes{phylum}(98);Armatimonadia{class}(98);Armatimonadales{order}(98);Armatimonadaceae{family}(98);Armatimonas/Armatimonadetes_gp1{genus}(98);uncultured_bacterium{species}(98)	Bacteria	Armatimonadetes	Armatimonadia	Armatimonadales	Armatimonadaceae	Armatimonas/Armatimonadetes_gp1	uncultured_bacterium
ASV1102	32	170	7	41	168	53	5	0	0	14	0	0	0	0	0	0	0	490	Bacteria{superkingdom}(100);Proteobacteria{phylum}(100);Alphaproteobacteria{class}(100);Caulobacterales{order}(100);Caulobacteraceae{family}(100);Phenylobacterium{genus}(100);Unassigned{species}(0)	Bacteria	Proteobacteria	Alphaproteobacteria	Caulobacterales	Caulobacteraceae	Phenylobacterium	Unassigned
ASV1103	94	0	26	29	100	0	19	7	38	11	85	129	157	0	0	0	5	700	Bacteria{superkingdom}(87);Actinobacteria{phylum}(87);Actinobacteria{class}(87);Actinomycetales{order}(87);Micrococcaceae{family}(87);Arthrobacter{genus}(87);Unassigned{species}(0)	Bacteria	Actinobacteria	Actinobacteria	Actinomycetales	Micrococcaceae	Arthrobacter	Unassigned
ASV1104	28	0	12	97	55	24	0	80	24	77	24	112	0	6	0	21	23	583	Bacteria{superkingdom}(100);Gemmatimonadetes{phylum}(100);Gemmatimonadetes{class}(100);Gemmatimonadales{order}(100);Gemmatimonadaceae{family}(100);Gemmatimonas{genus}(100);Unassigned{species}(0)	Bacteria	Gemmatimonadetes	Gemmatimonadetes	Gemmatimonadales	Gemmatimonadaceae	Gemmatimonas	Unassigned
ASV1105	0	0	0	0	0	0	32	0	0	0	0	0	0	0	0	0	0	32	Bacteria{superkingdom}(100);Chloroflexi{phylum}(100);Unassigned{class}(0);Unassigned{order}(0);Unassigned{family}(0);Unassigned{genus}(0);Unassigned{species}(0)	Bacteria	Chloroflexi	Unassigned	Unassigned	Unassigned	Unassigned	Unassigned
ASV1106	0	258	0	0	0	0	0	46	92	48	0	31	0	0	70	0	0	545	Bacteria{superkingdom}(100);Proteobacteria{phylum}(100);Betaproteobacteria{class}(100);{order}(100);{family}(100);{genus}(100);Unassigned{species}(0)	Bacteria	Proteobacteria	Betaproteobacteria				Unassigned
ASV1107	42	97	13	28	38	23	0	0	16	47	0	11	26	65	12	62	11	491	Bacteria{superkingdom}(99);Proteobacteria{phylum}(99);Alphaproteobacteria{class}(99);Sphingomonadales{order}(99);Sphingomonadaceae{family}(99);Sphingomonas{genus}(99);Unassigned{species}(0)	Bacteria	Proteobacteria	Alphaproteobacteria	Sphingomonadales	Sphingomonadaceae	Sphingomonas	Unassigned
ASV1108	0	0	0	0	0	0	0	0	0	0	0	0	0	61	186	0	0	247	Bacteria{superkingdom}(100);Actinobacteria{phylum}(100);Actinobacteria{class}(100);Actinomycetales{order}(100);Glycomycetaceae{family}(100);Glycomyces{genus}(100);Unassigned{species}(0)	Bacteria	Actinobacteria	Actinobacteria	Actinomycetales	Glycomycetaceae	Glycomyces	Unassigned
ASV1109	0	0	0	5	16	77	0	0	0	0	0	0	0	0	0	0	0	98	Bacteria{superkingdom}(90);Proteobacteria{phylum}(90);Betaproteobacteria{class}(90);Burkholderiales{order}(90);{family}(90);{genus}(90);Unassigned{species}(0)	Bacteria	Proteobacteria	Betaproteobacteria	Burkholderiales			Unassigned
ASV1110	0	0	0	0	0	0	37	0	0	13	41	145	157	66	103	23	69	654	Bacteria{superkingdom}(92);Acidobacteria{phylum}(92);Acidobacteria_Gp6{class}(92);{order}(92);{family}(92);Gp6{genus}(92);agricultural_soil_bacterium_SC-I-9{species}(92)	Bacteria	Acidobacteria	Acidobacteria_Gp6			Gp6	agricultural_soil_bacterium_SC-I-9
ASV1112	27	8	0	0	135	44	0	0	0	0	0	0	0	0	0	0	0	214	Bacteria{superkingdom}(95);Planctomycetes{phylum}(95);Planctomycetia{class}(95);Planctomycetales{order}(95);Planctomycetaceae{family}(95);Blastopirellula{genus}(95);uncultured_bacterium{species}(95)	Bacteria	Planctomycetes	Planctomycetia	Planctomycetales	Planctomycetaceae	Blastopirellula	uncultured_bacterium
ASV1113	0	99	0	0	0	0	31	274	0	0	63	0	0	0	291	0	258	1016	Bacteria{superkingdom}(99);Actinobacteria{phylum}(99);Actinobacteria{class}(99);{order}(99);{family}(99);{genus}(99);uncultured_Actinomycetales_bacterium{species}(99)	Bacteria	Actinobacteria	Actinobacteria				uncultured_Actinomycetales_bacterium
ASV1115	100	666	0	0	0	294	0	0	0	0	0	0	0	0	0	0	0	1060	Bacteria{superkingdom}(99);Actinobacteria{phylum}(99);Actinobacteria{class}(99);Actinomycetales{order}(99);Nocardioidaceae{family}(99);Aeromicrobium{genus}(99);Unassigned{species}(0)	Bacteria	Actinobacteria	Actinobacteria	Actinomycetales	Nocardioidaceae	Aeromicrobium	Unassigned
ASV1116	79	13	0	29	0	58	0	12	15	0	0	0	93	75	0	48	41	463	Bacteria{superkingdom}(87);Actinobacteria{phylum}(87);Actinobacteria{class}(87);Solirubrobacterales{order}(87);Conexibacteraceae{family}(87);Conexibacter{genus}(87);Unassigned{species}(0)	Bacteria	Actinobacteria	Actinobacteria	Solirubrobacterales	Conexibacteraceae	Conexibacter	Unassigned
ASV1117	0	0	18	0	0	148	0	0	0	0	0	0	0	0	0	0	0	166	Bacteria{superkingdom}(93);Planctomycetes{phylum}(93);Planctomycetia{class}(93);Planctomycetales{order}(93);Planctomycetaceae{family}(93);Thermogutta{genus}(93);Unassigned{species}(0)	Bacteria	Planctomycetes	Planctomycetia	Planctomycetales	Planctomycetaceae	Thermogutta	Unassigned
ASV1119	0	0	10	0	14	72	0	0	0	0	0	0	148	0	0	0	0	244	Bacteria{superkingdom}(100);candidate_division_WPS-1{phylum}(100);{class}(100);{order}(100);{family}(100);WPS-1_genera_incertae_sedis{genus}(100);Unassigned{species}(0)	Bacteria	candidate_division_WPS-1				WPS-1_genera_incertae_sedis	Unassigned
ASV1120	0	0	0	0	0	0	157	58	85	65	119	184	166	66	20	9	117	1046	Bacteria{superkingdom}(98);Proteobacteria{phylum}(98);Alphaproteobacteria{class}(98);Rhodospirillales{order}(98);Acetobacteraceae{family}(98);Roseomonas{genus}(98);Unassigned{species}(0)	Bacteria	Proteobacteria	Alphaproteobacteria	Rhodospirillales	Acetobacteraceae	Roseomonas	Unassigned
ASV1121	0	605	4	0	0	0	14	10	480	31	0	38	0	0	7	34	7	1230	Bacteria{superkingdom}(100);Proteobacteria{phylum}(100);Alphaproteobacteria{class}(100);Sphingomonadales{order}(100);Sphingomonadaceae{family}(100);Unassigned{genus}(0);Unassigned{species}(0)	Bacteria	Proteobacteria	Alphaproteobacteria	Sphingomonadales	Sphingomonadaceae	Unassigned	Unassigned
ASV1122	0	0	42	0	0	0	186	0	227	47	101	65	0	0	0	0	0	668	Bacteria{superkingdom}(100);Acidobacteria{phylum}(100);Acidobacteria_Gp6{class}(100);{order}(100);{family}(100);Gp6{genus}(100);Unassigned{species}(0)	Bacteria	Acidobacteria	Acidobacteria_Gp6			Gp6	Unassigned
ASV1123	158	0	71	147	130	179	0	11	23	17	0	0	0	0	0	0	0	736	Bacteria{superkingdom}(85);Actinobacteria{phylum}(85);Actinobacteria{class}(85);Solirubrobacterales{order}(85);Conexibacteraceae{family}(85);Conexibacter{genus}(85);uncultured_Rubrobacteraceae_bacterium{species}(85)	Bacteria	Actinobacteria	Actinobacteria	Solirubrobacterales	Conexibacteraceae	Conexibacter	uncultured_Rubrobacteraceae_bacterium
ASV1124	95	0	88	64	105	82	41	0	0	0	0	0	0	0	0	0	28	503	Bacteria{superkingdom}(100);Acidobacteria{phylum}(100);Acidobacteria_Gp6{class}(100);{order}(100);{family}(100);Gp6{genus}(100);Unassigned{species}(0)	Bacteria	Acidobacteria	Acidobacteria_Gp6			Gp6	Unassigned
ASV1125	50	37	0	0	18	94	0	0	0	0	0	7	146	0	0	16	0	368	Bacteria{superkingdom}(95);Proteobacteria{phylum}(95);Deltaproteobacteria{class}(95);Myxococcales{order}(95);Sandaracinaceae{family}(95);Sandaracinus{genus}(95);uncultured_Myxococcales_bacterium{species}(95)	Bacteria	Proteobacteria	Deltaproteobacteria	Myxococcales	Sandaracinaceae	Sandaracinus	uncultured_Myxococcales_bacterium
ASV1126	0	54	0	0	0	32	0	19	0	0	18	43	167	0	0	53	157	543	Bacteria{superkingdom}(90);Actinobacteria{phylum}(90);Actinobacteria{class}(90);Acidimicrobiales{order}(90);Unassigned{family}(0);Unassigned{genus}(0);Unassigned{species}(0)	Bacteria	Actinobacteria	Actinobacteria	Acidimicrobiales	Unassigned	Unassigned	Unassigned
ASV1127	0	0	0	0	0	24	0	0	0	0	0	0	0	0	0	0	0	24	Bacteria{superkingdom}(100);Proteobacteria{phylum}(100);Alphaproteobacteria{class}(100);Rhizobiales{order}(100);Unassigned{family}(0);Unassigned{genus}(0);Unassigned{species}(0)	Bacteria	Proteobacteria	Alphaproteobacteria	Rhizobiales	Unassigned	Unassigned	Unassigned
ASV1128	28	0	4	0	0	0	0	0	0	0	0	0	0	0	0	0	0	32	Bacteria{superkingdom}(100);Actinobacteria{phylum}(100);Actinobacteria{class}(100);Actinomycetales{order}(100);Promicromonosporaceae{family}(100);Promicromonospora{genus}(100);Unassigned{species}(0)	Bacteria	Actinobacteria	Actinobacteria	Actinomycetales	Promicromonosporaceae	Promicromonospora	Unassigned
ASV1129	88	151	0	0	0	0	0	0	0	0	0	0	0	0	0	0	0	239	Bacteria{superkingdom}(99);Actinobacteria{phylum}(99);Actinobacteria{class}(99);Actinomycetales{order}(99);{family}(99);{genus}(99);uncultured_Blastococcus_sp.{species}(99)	Bacteria	Actinobacteria	Actinobacteria	Actinomycetales			uncultured_Blastococcus_sp.
ASV1130	37	13	13	21	41	0	24	14	45	15	0	7	38	3	0	0	41	312	Bacteria{superkingdom}(99);Proteobacteria{phylum}(99);Deltaproteobacteria{class}(99);Bdellovibrionales{order}(99);Bdellovibrionaceae{family}(99);Vampirovibrio{genus}(99);uncultured_bacterium{species}(99)	Bacteria	Proteobacteria	Deltaproteobacteria	Bdellovibrionales	Bdellovibrionaceae	Vampirovibrio	uncultured_bacterium
ASV1131	54	0	9	156	0	20	0	0	0	0	67	70	113	74	79	34	33	709	Bacteria{superkingdom}(100);Nitrospirae{phylum}(100);Nitrospira{class}(100);Nitrospirales{order}(100);Nitrospiraceae{family}(100);Nitrospira{genus}(100);Unassigned{species}(0)	Bacteria	Nitrospirae	Nitrospira	Nitrospirales	Nitrospiraceae	Nitrospira	Unassigned
ASV1132	0	0	0	18	69	0	20	0	0	0	0	0	0	0	0	0	0	107	Bacteria{superkingdom}(100);Acidobacteria{phylum}(100);Acidobacteria_Gp7{class}(100);{order}(100);{family}(100);Gp7{genus}(100);Unassigned{species}(0)	Bacteria	Acidobacteria	Acidobacteria_Gp7			Gp7	Unassigned
ASV1133	0	2450	0	0	0	0	0	0	0	0	0	0	0	0	0	0	0	2450	Bacteria{superkingdom}(94);Acidobacteria{phylum}(94);Acidobacteria_Gp6{class}(94);{order}(94);{family}(94);Gp6{genus}(94);uncultured_Desulfitobacterium_sp.{species}(94)	Bacteria	Acidobacteria	Acidobacteria_Gp6			Gp6	uncultured_Desulfitobacterium_sp.
ASV1134	0	0	35	28	0	98	0	0	0	0	0	0	14	0	0	0	12	187	Bacteria{superkingdom}(100);Planctomycetes{phylum}(100);Planctomycetia{class}(100);Planctomycetales{order}(100);Planctomycetaceae{family}(100);{genus}(100);planctomycete_WY69{species}(100)	Bacteria	Planctomycetes	Planctomycetia	Planctomycetales	Planctomycetaceae		planctomycete_WY69
ASV1135	0	0	49	0	0	0	0	0	0	0	0	0	15	0	0	0	5	69	Bacteria{superkingdom}(97);Acidobacteria{phylum}(97);Acidobacteria_Gp4{class}(97);{order}(97);{family}(97);Aridibacter{genus}(97);Unassigned{species}(0)	Bacteria	Acidobacteria	Acidobacteria_Gp4			Aridibacter	Unassigned
ASV1137	7	0	15	185	59	0	0	0	0	0	0	0	0	0	0	0	0	266	Bacteria{superkingdom}(99);Bacteroidetes{phylum}(99);Sphingobacteriia{class}(99);Sphingobacteriales{order}(99);Chitinophagaceae{family}(99);{genus}(99);Unassigned{species}(0)	Bacteria	Bacteroidetes	Sphingobacteriia	Sphingobacteriales	Chitinophagaceae		Unassigned
ASV1138	0	466	0	0	0	0	47	0	0	0	32	0	42	0	0	18	0	605	Bacteria{superkingdom}(100);Acidobacteria{phylum}(100);Acidobacteria_Gp6{class}(100);{order}(100);{family}(100);Gp6{genus}(100);Unassigned{species}(0)	Bacteria	Acidobacteria	Acidobacteria_Gp6			Gp6	Unassigned
ASV1139	111	27	0	0	0	27	0	0	0	0	0	0	0	0	0	0	0	165	Bacteria{superkingdom}(100);Chloroflexi{phylum}(100);Caldilineae{class}(100);Caldilineales{order}(100);Caldilineaceae{family}(100);Litorilinea{genus}(100);Unassigned{species}(0)	Bacteria	Chloroflexi	Caldilineae	Caldilineales	Caldilineaceae	Litorilinea	Unassigned
ASV1140	36	0	0	0	0	60	30	0	44	0	0	32	25	67	0	24	59	377	Bacteria{superkingdom}(100);Chloroflexi{phylum}(100);{class}(100);{order}(100);{family}(100);{genus}(100);uncultured_Anaerolineae_bacterium{species}(100)	Bacteria	Chloroflexi					uncultured_Anaerolineae_bacterium
ASV1141	0	0	0	0	0	21	28	0	0	0	0	0	0	0	0	0	0	49	Bacteria{superkingdom}(100);Acidobacteria{phylum}(100);Acidobacteria_Gp6{class}(100);{order}(100);{family}(100);Gp6{genus}(100);Unassigned{species}(0)	Bacteria	Acidobacteria	Acidobacteria_Gp6			Gp6	Unassigned
ASV1142	0	0	0	53	34	72	0	0	0	0	0	0	0	0	0	0	0	159	Bacteria{superkingdom}(98);Proteobacteria{phylum}(98);Alphaproteobacteria{class}(98);Rhodospirillales{order}(98);Acetobacteraceae{family}(98);Roseomonas{genus}(98);Unassigned{species}(0)	Bacteria	Proteobacteria	Alphaproteobacteria	Rhodospirillales	Acetobacteraceae	Roseomonas	Unassigned
ASV1143	0	0	11	12	57	21	319	324	59	245	8	26	0	0	0	0	0	1082	Bacteria{superkingdom}(100);Bacteroidetes{phylum}(100);Sphingobacteriia{class}(100);Sphingobacteriales{order}(100);Chitinophagaceae{family}(100);{genus}(100);Unassigned{species}(0)	Bacteria	Bacteroidetes	Sphingobacteriia	Sphingobacteriales	Chitinophagaceae		Unassigned
ASV1144	0	0	0	0	0	0	0	0	0	0	26	0	0	0	0	0	0	26	Bacteria{superkingdom}(100);Bacteroidetes{phylum}(100);Sphingobacteriia{class}(100);Sphingobacteriales{order}(100);Chitinophagaceae{family}(100);Unassigned{genus}(0);Unassigned{species}(0)	Bacteria	Bacteroidetes	Sphingobacteriia	Sphingobacteriales	Chitinophagaceae	Unassigned	Unassigned
ASV1146	0	0	114	49	0	44	0	0	0	0	0	0	0	0	0	0	0	207	Bacteria{superkingdom}(100);Actinobacteria{phylum}(100);Actinobacteria{class}(100);Actinomycetales{order}(100);Streptosporangiaceae{family}(100);Nonomuraea{genus}(100);Unassigned{species}(0)	Bacteria	Actinobacteria	Actinobacteria	Actinomycetales	Streptosporangiaceae	Nonomuraea	Unassigned
ASV1147	0	0	0	0	64	0	9	9	20	0	0	13	56	0	0	0	9	180	Bacteria{superkingdom}(94);Bacteroidetes{phylum}(94);Sphingobacteriia{class}(94);Sphingobacteriales{order}(94);Chitinophagaceae{family}(94);{genus}(94);uncultured_Cytophaga_sp.{species}(94)	Bacteria	Bacteroidetes	Sphingobacteriia	Sphingobacteriales	Chitinophagaceae		uncultured_Cytophaga_sp.
ASV1148	24	22	119	36	23	77	90	57	9	70	35	43	18	11	150	0	58	842	Bacteria{superkingdom}(100);Actinobacteria{phylum}(100);Actinobacteria{class}(100);Acidimicrobiales{order}(100);Unassigned{family}(0);Unassigned{genus}(0);Unassigned{species}(0)	Bacteria	Actinobacteria	Actinobacteria	Acidimicrobiales	Unassigned	Unassigned	Unassigned
ASV1149	0	34	0	0	0	0	0	0	0	0	0	0	0	0	0	23	0	57	Bacteria{superkingdom}(100);Actinobacteria{phylum}(100);Actinobacteria{class}(100);Actinomycetales{order}(100);Streptomycetaceae{family}(100);Streptomyces{genus}(100);Unassigned{species}(0)	Bacteria	Actinobacteria	Actinobacteria	Actinomycetales	Streptomycetaceae	Streptomyces	Unassigned
ASV1150	0	0	0	0	0	0	0	0	0	0	0	0	0	0	0	40	0	40	Bacteria{superkingdom}(100);Chloroflexi{phylum}(100);Chloroflexia{class}(100);Kallotenuales{order}(100);Kallotenuaceae{family}(100);Kallotenue{genus}(100);Unassigned{species}(0)	Bacteria	Chloroflexi	Chloroflexia	Kallotenuales	Kallotenuaceae	Kallotenue	Unassigned
ASV1151	31	0	6	19	216	87	0	0	0	0	0	0	0	0	0	0	15	374	Bacteria{superkingdom}(100);Verrucomicrobia{phylum}(100);Opitutae{class}(100);Opitutales{order}(100);Opitutaceae{family}(100);Opitutus{genus}(100);Unassigned{species}(0)	Bacteria	Verrucomicrobia	Opitutae	Opitutales	Opitutaceae	Opitutus	Unassigned
ASV1152	25	0	0	127	25	252	0	0	0	0	0	0	0	0	0	0	0	429	Bacteria{superkingdom}(100);Actinobacteria{phylum}(100);Actinobacteria{class}(100);Actinomycetales{order}(100);Propionibacteriaceae{family}(100);Microlunatus{genus}(100);Unassigned{species}(0)	Bacteria	Actinobacteria	Actinobacteria	Actinomycetales	Propionibacteriaceae	Microlunatus	Unassigned
ASV1153	0	0	0	0	0	0	0	0	0	104	0	0	0	0	0	0	0	104	Bacteria{superkingdom}(93);Acidobacteria{phylum}(93);Acidobacteria_Gp4{class}(93);{order}(93);{family}(93);Gp4{genus}(93);uncultured_Rhodopseudomonas_sp.{species}(93)	Bacteria	Acidobacteria	Acidobacteria_Gp4			Gp4	uncultured_Rhodopseudomonas_sp.
ASV1154	68	37	19	18	69	16	15	0	0	11	0	11	0	14	17	45	0	340	Bacteria{superkingdom}(97);Actinobacteria{phylum}(97);Actinobacteria{class}(97);Solirubrobacterales{order}(97);{family}(97);{genus}(97);uncultured_bacterium{species}(97)	Bacteria	Actinobacteria	Actinobacteria	Solirubrobacterales			uncultured_bacterium
ASV1155	0	0	232	125	0	0	0	0	0	0	0	0	0	0	0	0	0	357	Bacteria{superkingdom}(94);Actinobacteria{phylum}(94);Actinobacteria{class}(94);Actinomycetales{order}(94);Pseudonocardiaceae{family}(94);Kibdelosporangium{genus}(94);Unassigned{species}(0)	Bacteria	Actinobacteria	Actinobacteria	Actinomycetales	Pseudonocardiaceae	Kibdelosporangium	Unassigned
ASV1156	0	0	0	129	0	0	0	0	0	0	0	0	0	0	0	0	0	129	Bacteria{superkingdom}(100);Actinobacteria{phylum}(100);Actinobacteria{class}(100);Actinomycetales{order}(100);Micromonosporaceae{family}(100);Phytomonospora{genus}(100);Unassigned{species}(0)	Bacteria	Actinobacteria	Actinobacteria	Actinomycetales	Micromonosporaceae	Phytomonospora	Unassigned
ASV1157	0	0	0	8	32	38	0	0	0	0	0	0	0	11	0	0	0	89	Bacteria{superkingdom}(97);Proteobacteria{phylum}(97);Gammaproteobacteria{class}(97);{order}(97);{family}(97);{genus}(97);uncultured_Steroidobacter_sp.{species}(97)	Bacteria	Proteobacteria	Gammaproteobacteria				uncultured_Steroidobacter_sp.
ASV1158	0	19	0	0	0	0	0	0	0	0	0	0	0	0	4	0	0	23	Bacteria{superkingdom}(100);Proteobacteria{phylum}(100);Gammaproteobacteria{class}(100);{order}(100);{family}(100);{genus}(100);bacterium_endosymbiont_of_Onthophagus_Taurus{species}(100)	Bacteria	Proteobacteria	Gammaproteobacteria				bacterium_endosymbiont_of_Onthophagus_Taurus
ASV1159	98	42	45	47	0	0	21	0	16	14	0	0	0	0	0	0	0	283	Bacteria{superkingdom}(95);Proteobacteria{phylum}(95);Deltaproteobacteria{class}(95);{order}(95);{family}(95);{genus}(95);Unassigned{species}(0)	Bacteria	Proteobacteria	Deltaproteobacteria				Unassigned
ASV1160	0	19	26	28	148	51	33	44	39	31	42	33	98	111	145	55	90	993	Bacteria{superkingdom}(87);Actinobacteria{phylum}(87);Actinobacteria{class}(87);Actinomycetales{order}(87);Nocardioidaceae{family}(87);Nocardioides{genus}(87);Nocardioides_dilutus{species}(87)	Bacteria	Actinobacteria	Actinobacteria	Actinomycetales	Nocardioidaceae	Nocardioides	Nocardioides_dilutus
ASV1161	0	0	32	0	27	10	122	327	56	29	41	38	0	6	0	0	327	1015	Bacteria{superkingdom}(94);Bacteroidetes{phylum}(94);Sphingobacteriia{class}(94);Sphingobacteriales{order}(94);Rhodothermaceae{family}(94);{genus}(94);uncultured_bacterium{species}(94)	Bacteria	Bacteroidetes	Sphingobacteriia	Sphingobacteriales	Rhodothermaceae		uncultured_bacterium
ASV1162	0	46	39	0	0	0	24	36	0	65	0	14	14	0	21	0	0	259	Bacteria{superkingdom}(100);Bacteroidetes{phylum}(100);Sphingobacteriia{class}(100);Sphingobacteriales{order}(100);Chitinophagaceae{family}(100);Unassigned{genus}(0);Unassigned{species}(0)	Bacteria	Bacteroidetes	Sphingobacteriia	Sphingobacteriales	Chitinophagaceae	Unassigned	Unassigned
ASV1163	185	0	0	421	0	207	0	0	0	0	200	0	0	0	0	0	0	1013	Bacteria{superkingdom}(99);Actinobacteria{phylum}(99);Actinobacteria{class}(99);Actinomycetales{order}(99);Streptomycetaceae{family}(99);Streptomyces{genus}(99);Unassigned{species}(0)	Bacteria	Actinobacteria	Actinobacteria	Actinomycetales	Streptomycetaceae	Streptomyces	Unassigned
ASV1164	29	0	50	7	135	54	0	0	0	13	15	19	69	42	9	26	33	501	Bacteria{superkingdom}(88);candidate_division_WPS-1{phylum}(88);{class}(88);{order}(88);{family}(88);WPS-1_genera_incertae_sedis{genus}(88);uncultured_Phycisphaera_sp.{species}(88)	Bacteria	candidate_division_WPS-1				WPS-1_genera_incertae_sedis	uncultured_Phycisphaera_sp.
ASV1166	0	24	0	67	0	42	0	0	0	28	0	0	19	55	42	55	50	382	Bacteria{superkingdom}(100);Acidobacteria{phylum}(100);Acidobacteria_Gp6{class}(100);{order}(100);{family}(100);Gp6{genus}(100);Unassigned{species}(0)	Bacteria	Acidobacteria	Acidobacteria_Gp6			Gp6	Unassigned
ASV1167	0	242	0	0	0	0	0	33	113	0	0	61	0	0	0	0	0	449	Bacteria{superkingdom}(87);Bacteroidetes{phylum}(87);Sphingobacteriia{class}(87);Sphingobacteriales{order}(87);Chitinophagaceae{family}(87);{genus}(87);Unassigned{species}(0)	Bacteria	Bacteroidetes	Sphingobacteriia	Sphingobacteriales	Chitinophagaceae		Unassigned
ASV1168	19	0	3	0	0	0	7	0	0	0	0	0	0	0	0	7	0	36	Bacteria{superkingdom}(100);Proteobacteria{phylum}(100);Alphaproteobacteria{class}(100);Rhizobiales{order}(100);{family}(100);{genus}(100);Unassigned{species}(0)	Bacteria	Proteobacteria	Alphaproteobacteria	Rhizobiales			Unassigned
ASV1169	86	0	25	24	0	80	129	23	98	0	0	0	47	0	0	0	11	523	Bacteria{superkingdom}(90);Proteobacteria{phylum}(90);Deltaproteobacteria{class}(90);Myxococcales{order}(90);Labilitrichaceae{family}(90);Labilithrix{genus}(90);uncultured_delta_proteobacterium{species}(90)	Bacteria	Proteobacteria	Deltaproteobacteria	Myxococcales	Labilitrichaceae	Labilithrix	uncultured_delta_proteobacterium
ASV1170	0	151	0	0	0	0	0	58	0	157	0	0	0	0	443	0	0	809	Bacteria{superkingdom}(100);Actinobacteria{phylum}(100);Unassigned{class}(0);Unassigned{order}(0);Unassigned{family}(0);Unassigned{genus}(0);Unassigned{species}(0)	Bacteria	Actinobacteria	Unassigned	Unassigned	Unassigned	Unassigned	Unassigned
ASV1171	0	21	0	0	55	47	0	0	13	17	0	12	27	0	0	0	0	192	Bacteria{superkingdom}(82);Planctomycetes{phylum}(82);Planctomycetia{class}(82);Planctomycetales{order}(82);Planctomycetaceae{family}(82);Pirellula{genus}(82);Unassigned{species}(0)	Bacteria	Planctomycetes	Planctomycetia	Planctomycetales	Planctomycetaceae	Pirellula	Unassigned
ASV1172	55	0	0	36	282	63	0	0	0	0	0	0	0	0	0	0	0	436	Bacteria{superkingdom}(100);Proteobacteria{phylum}(100);Alphaproteobacteria{class}(100);Rhizobiales{order}(100);Hyphomicrobiaceae{family}(100);Hyphomicrobium{genus}(100);Unassigned{species}(0)	Bacteria	Proteobacteria	Alphaproteobacteria	Rhizobiales	Hyphomicrobiaceae	Hyphomicrobium	Unassigned
ASV1174	108	0	0	0	0	0	29	0	0	0	0	0	0	0	0	0	0	137	Bacteria{superkingdom}(100);{phylum}(100);{class}(100);{order}(100);{family}(100);{genus}(100);uncultured_Actinomyces_sp.{species}(100)	Bacteria						uncultured_Actinomyces_sp.
ASV1175	65	0	36	0	23	0	0	0	38	0	0	0	0	0	0	0	0	162	Bacteria{superkingdom}(100);Planctomycetes{phylum}(100);Planctomycetia{class}(100);Planctomycetales{order}(100);Planctomycetaceae{family}(100);Unassigned{genus}(0);Unassigned{species}(0)	Bacteria	Planctomycetes	Planctomycetia	Planctomycetales	Planctomycetaceae	Unassigned	Unassigned
ASV1176	0	47	15	12	0	0	66	82	27	83	0	45	51	32	102	42	28	632	Bacteria{superkingdom}(100);Proteobacteria{phylum}(100);Alphaproteobacteria{class}(100);Rhodospirillales{order}(100);Rhodospirillaceae{family}(100);Constrictibacter{genus}(100);uncultured_bacterium{species}(100)	Bacteria	Proteobacteria	Alphaproteobacteria	Rhodospirillales	Rhodospirillaceae	Constrictibacter	uncultured_bacterium
ASV1178	37	0	14	0	71	0	21	0	0	0	0	28	80	0	0	0	0	251	Bacteria{superkingdom}(95);Proteobacteria{phylum}(95);Alphaproteobacteria{class}(95);Rhodospirillales{order}(95);Unassigned{family}(0);Unassigned{genus}(0);Unassigned{species}(0)	Bacteria	Proteobacteria	Alphaproteobacteria	Rhodospirillales	Unassigned	Unassigned	Unassigned
ASV1179	0	132	0	0	191	228	0	0	0	0	0	0	69	0	0	61	90	771	Bacteria{superkingdom}(100);Actinobacteria{phylum}(100);Actinobacteria{class}(100);Actinomycetales{order}(100);Nocardioidaceae{family}(100);Nocardioides{genus}(100);Unassigned{species}(0)	Bacteria	Actinobacteria	Actinobacteria	Actinomycetales	Nocardioidaceae	Nocardioides	Unassigned
ASV1180	0	108	0	45	0	42	0	51	0	143	0	100	0	0	0	0	19	508	Bacteria{superkingdom}(100);Chloroflexi{phylum}(100);{class}(100);{order}(100);{family}(100);{genus}(100);uncultured_Anaerolineae_bacterium{species}(100)	Bacteria	Chloroflexi					uncultured_Anaerolineae_bacterium
ASV1181	54	0	69	0	0	36	0	0	0	0	0	0	0	0	0	0	0	159	Bacteria{superkingdom}(86);Actinobacteria{phylum}(86);Actinobacteria{class}(86);Actinomycetales{order}(86);Unassigned{family}(0);Unassigned{genus}(0);Unassigned{species}(0)	Bacteria	Actinobacteria	Actinobacteria	Actinomycetales	Unassigned	Unassigned	Unassigned
ASV1182	20	0	17	8	0	0	25	60	32	66	47	13	181	0	11	0	145	625	Bacteria{superkingdom}(100);Acidobacteria{phylum}(100);Acidobacteria_Gp6{class}(100);{order}(100);{family}(100);Gp6{genus}(100);Unassigned{species}(0)	Bacteria	Acidobacteria	Acidobacteria_Gp6			Gp6	Unassigned
ASV1183	31	0	0	0	91	33	24	0	0	0	0	0	0	0	0	0	0	179	Bacteria{superkingdom}(97);Proteobacteria{phylum}(97);Gammaproteobacteria{class}(97);{order}(97);{family}(97);{genus}(97);uncultured_Steroidobacter_sp.{species}(97)	Bacteria	Proteobacteria	Gammaproteobacteria				uncultured_Steroidobacter_sp.
ASV1184	0	125	0	0	0	0	51	0	53	0	0	45	53	89	241	104	79	840	Bacteria{superkingdom}(100);Proteobacteria{phylum}(100);Betaproteobacteria{class}(100);{order}(100);{family}(100);{genus}(100);Unassigned{species}(0)	Bacteria	Proteobacteria	Betaproteobacteria				Unassigned
ASV1185	0	0	0	46	0	0	0	0	0	0	0	0	0	0	0	0	0	46	Bacteria{superkingdom}(100);Acidobacteria{phylum}(100);Acidobacteria_Gp7{class}(100);{order}(100);{family}(100);Gp7{genus}(100);Unassigned{species}(0)	Bacteria	Acidobacteria	Acidobacteria_Gp7			Gp7	Unassigned
ASV1187	68	0	38	80	50	77	0	7	6	0	78	14	8	0	0	0	16	442	Bacteria{superkingdom}(89);Planctomycetes{phylum}(89);Planctomycetia{class}(89);Planctomycetales{order}(89);Planctomycetaceae{family}(89);{genus}(89);Unassigned{species}(0)	Bacteria	Planctomycetes	Planctomycetia	Planctomycetales	Planctomycetaceae		Unassigned
ASV1188	16	0	0	47	32	77	0	12	0	20	0	0	9	29	0	0	11	253	Bacteria{superkingdom}(100);Proteobacteria{phylum}(100);Alphaproteobacteria{class}(100);Rhizobiales{order}(100);Unassigned{family}(0);Unassigned{genus}(0);Unassigned{species}(0)	Bacteria	Proteobacteria	Alphaproteobacteria	Rhizobiales	Unassigned	Unassigned	Unassigned
ASV1189	0	0	0	0	0	0	0	0	0	0	0	603	0	0	0	0	0	603	Bacteria{superkingdom}(94);Bacteroidetes{phylum}(94);Cytophagia{class}(94);Cytophagales{order}(94);Cytophagaceae{family}(94);Rufibacter{genus}(94);uncultured_bacterium{species}(94)	Bacteria	Bacteroidetes	Cytophagia	Cytophagales	Cytophagaceae	Rufibacter	uncultured_bacterium
ASV1190	36	79	0	0	206	0	0	25	0	0	0	0	89	0	0	0	54	489	Bacteria{superkingdom}(86);Planctomycetes{phylum}(86);Planctomycetia{class}(86);Planctomycetales{order}(86);Planctomycetaceae{family}(86);Gimesia{genus}(86);Unassigned{species}(0)	Bacteria	Planctomycetes	Planctomycetia	Planctomycetales	Planctomycetaceae	Gimesia	Unassigned
ASV1191	33	0	0	0	0	0	0	0	0	0	0	0	0	0	0	0	0	33	Bacteria{superkingdom}(100);Proteobacteria{phylum}(100);Betaproteobacteria{class}(100);Burkholderiales{order}(100);Burkholderiaceae{family}(100);Cupriavidus{genus}(100);Unassigned{species}(0)	Bacteria	Proteobacteria	Betaproteobacteria	Burkholderiales	Burkholderiaceae	Cupriavidus	Unassigned
ASV1192	0	0	0	12	25	0	0	0	0	0	0	18	21	12	35	14	0	137	Bacteria{superkingdom}(100);Proteobacteria{phylum}(100);Alphaproteobacteria{class}(100);Alphaproteobacteria_incertae_sedis{order}(100);{family}(100);Rhizomicrobium{genus}(100);Unassigned{species}(0)	Bacteria	Proteobacteria	Alphaproteobacteria	Alphaproteobacteria_incertae_sedis		Rhizomicrobium	Unassigned
ASV1193	51	0	20	0	0	88	0	29	0	0	0	13	0	0	0	47	0	248	Bacteria{superkingdom}(100);{phylum}(100);{class}(100);{order}(100);{family}(100);{genus}(100);uncultured_Actinomyces_sp.{species}(100)	Bacteria						uncultured_Actinomyces_sp.
ASV1194	6	0	0	0	10	32	0	0	0	0	0	42	0	0	39	58	0	187	Bacteria{superkingdom}(95);Proteobacteria{phylum}(95);Deltaproteobacteria{class}(95);Myxococcales{order}(95);Kofleriaceae{family}(95);Kofleria{genus}(95);uncultured_Anaeromyxobacter_sp.{species}(95)	Bacteria	Proteobacteria	Deltaproteobacteria	Myxococcales	Kofleriaceae	Kofleria	uncultured_Anaeromyxobacter_sp.
ASV1195	0	0	0	0	276	0	0	0	0	0	0	0	0	0	0	0	0	276	Bacteria{superkingdom}(100);Bacteroidetes{phylum}(100);Flavobacteriia{class}(100);Flavobacteriales{order}(100);Flavobacteriaceae{family}(100);Flavobacterium{genus}(100);Unassigned{species}(0)	Bacteria	Bacteroidetes	Flavobacteriia	Flavobacteriales	Flavobacteriaceae	Flavobacterium	Unassigned
ASV1196	10	0	175	0	62	0	25	212	170	33	0	49	0	0	0	0	0	736	Bacteria{superkingdom}(84);Proteobacteria{phylum}(84);Gammaproteobacteria{class}(84);Xanthomonadales{order}(84);Sinobacteraceae{family}(84);{genus}(84);Unassigned{species}(0)	Bacteria	Proteobacteria	Gammaproteobacteria	Xanthomonadales	Sinobacteraceae		Unassigned
ASV1197	384	0	55	30	274	31	0	0	0	0	0	0	0	0	0	0	0	774	Bacteria{superkingdom}(100);Proteobacteria{phylum}(100);Gammaproteobacteria{class}(100);Unassigned{order}(0);Unassigned{family}(0);Unassigned{genus}(0);Unassigned{species}(0)	Bacteria	Proteobacteria	Gammaproteobacteria	Unassigned	Unassigned	Unassigned	Unassigned
ASV1198	70	0	14	0	0	0	0	0	0	0	9	0	0	0	0	0	0	93	Bacteria{superkingdom}(97);Planctomycetes{phylum}(97);Planctomycetia{class}(97);Planctomycetales{order}(97);Planctomycetaceae{family}(97);Blastopirellula{genus}(97);uncultured_bacterium{species}(97)	Bacteria	Planctomycetes	Planctomycetia	Planctomycetales	Planctomycetaceae	Blastopirellula	uncultured_bacterium
ASV1199	0	0	20	0	48	25	8	0	0	0	0	0	0	0	0	7	0	108	Bacteria{superkingdom}(100);Planctomycetes{phylum}(100);Planctomycetia{class}(100);Planctomycetales{order}(100);Planctomycetaceae{family}(100);Unassigned{genus}(0);Unassigned{species}(0)	Bacteria	Planctomycetes	Planctomycetia	Planctomycetales	Planctomycetaceae	Unassigned	Unassigned
ASV1200	0	0	0	84	188	0	6	17	0	0	91	6	13	28	43	160	0	636	Bacteria{superkingdom}(100);Bacteroidetes{phylum}(100);Cytophagia{class}(100);Cytophagales{order}(100);Cytophagaceae{family}(100);Dyadobacter{genus}(100);Unassigned{species}(0)	Bacteria	Bacteroidetes	Cytophagia	Cytophagales	Cytophagaceae	Dyadobacter	Unassigned
ASV1201	58	125	0	0	71	0	71	0	40	31	66	32	0	0	0	0	0	494	Bacteria{superkingdom}(92);Proteobacteria{phylum}(92);Betaproteobacteria{class}(92);{order}(92);{family}(92);{genus}(92);uncultured_Alcaligenaceae_bacterium{species}(92)	Bacteria	Proteobacteria	Betaproteobacteria				uncultured_Alcaligenaceae_bacterium
ASV1202	5	299	0	0	36	0	72	0	360	52	0	31	0	0	0	0	0	855	Bacteria{superkingdom}(99);Chloroflexi{phylum}(99);Chloroflexia{class}(99);{order}(99);{family}(99);{genus}(99);uncultured_bacterium{species}(99)	Bacteria	Chloroflexi	Chloroflexia				uncultured_bacterium
ASV1204	35	0	55	87	128	115	0	0	0	0	0	0	0	0	0	0	0	420	Bacteria{superkingdom}(100);Proteobacteria{phylum}(100);Alphaproteobacteria{class}(100);Rhizobiales{order}(100);Hyphomicrobiaceae{family}(100);Devosia{genus}(100);Unassigned{species}(0)	Bacteria	Proteobacteria	Alphaproteobacteria	Rhizobiales	Hyphomicrobiaceae	Devosia	Unassigned
ASV1206	25	0	21	19	52	44	16	19	9	14	0	13	6	0	0	0	23	261	Bacteria{superkingdom}(95);Chloroflexi{phylum}(95);{class}(95);{order}(95);{family}(95);{genus}(95);uncultured_Firmicutes_bacterium{species}(95)	Bacteria	Chloroflexi					uncultured_Firmicutes_bacterium
ASV1207	77	0	0	0	0	148	0	0	0	0	0	0	0	0	0	0	0	225	Bacteria{superkingdom}(100);Acidobacteria{phylum}(100);Acidobacteria_Gp6{class}(100);{order}(100);{family}(100);Gp6{genus}(100);Unassigned{species}(0)	Bacteria	Acidobacteria	Acidobacteria_Gp6			Gp6	Unassigned
ASV1208	42	0	4	2	0	85	0	0	0	0	0	0	0	0	0	0	0	133	Bacteria{superkingdom}(84);Chloroflexi{phylum}(84);Thermomicrobia{class}(84);Sphaerobacterales{order}(84);Sphaerobacteraceae{family}(84);Nitrolancea{genus}(84);Unassigned{species}(0)	Bacteria	Chloroflexi	Thermomicrobia	Sphaerobacterales	Sphaerobacteraceae	Nitrolancea	Unassigned
ASV1209	46	13	0	12	57	24	132	287	72	85	48	21	105	0	0	0	45	947	Bacteria{superkingdom}(100);Acidobacteria{phylum}(100);Acidobacteria_Gp4{class}(100);{order}(100);{family}(100);{genus}(100);uncultured_Pelobacter_sp.{species}(100)	Bacteria	Acidobacteria	Acidobacteria_Gp4				uncultured_Pelobacter_sp.
ASV1210	20	90	42	37	115	39	0	0	0	25	0	0	78	15	8	7	13	489	Bacteria{superkingdom}(93);{phylum}(93);{class}(93);{order}(93);{family}(93);{genus}(93);Unassigned{species}(0)	Bacteria						Unassigned
ASV1211	40	0	26	65	93	120	0	0	0	0	7	0	24	16	0	32	5	428	Bacteria{superkingdom}(80);Proteobacteria{phylum}(80);Alphaproteobacteria{class}(80);Rhodospirillales{order}(80);{family}(80);{genus}(80);uncultured_Gluconobacter_sp.{species}(80)	Bacteria	Proteobacteria	Alphaproteobacteria	Rhodospirillales			uncultured_Gluconobacter_sp.
ASV1212	118	0	50	139	64	156	0	0	0	0	0	0	0	0	0	104	0	631	Bacteria{superkingdom}(94);Actinobacteria{phylum}(94);Actinobacteria{class}(94);Actinomycetales{order}(94);Nocardioidaceae{family}(94);Nocardioides{genus}(94);uncultured_Actinomyces_sp.{species}(94)	Bacteria	Actinobacteria	Actinobacteria	Actinomycetales	Nocardioidaceae	Nocardioides	uncultured_Actinomyces_sp.
ASV1213	79	0	47	0	0	78	102	0	142	0	0	48	53	0	47	0	86	682	Bacteria{superkingdom}(91);Actinobacteria{phylum}(91);Actinobacteria{class}(91);Actinomycetales{order}(91);Nocardioidaceae{family}(91);Marmoricola{genus}(91);Unassigned{species}(0)	Bacteria	Actinobacteria	Actinobacteria	Actinomycetales	Nocardioidaceae	Marmoricola	Unassigned
ASV1214	0	53	0	0	0	0	0	0	0	0	0	0	0	0	0	0	0	53	Bacteria{superkingdom}(86);Bacteroidetes{phylum}(86);Sphingobacteriia{class}(86);Sphingobacteriales{order}(86);Chitinophagaceae{family}(86);Niastella{genus}(86);Unassigned{species}(0)	Bacteria	Bacteroidetes	Sphingobacteriia	Sphingobacteriales	Chitinophagaceae	Niastella	Unassigned
ASV1215	66	42	0	8	0	0	0	0	0	0	7	54	0	0	5	72	0	254	Bacteria{superkingdom}(100);Actinobacteria{phylum}(100);Actinobacteria{class}(100);Actinomycetales{order}(100);Nocardioidaceae{family}(100);Nocardioides{genus}(100);Unassigned{species}(0)	Bacteria	Actinobacteria	Actinobacteria	Actinomycetales	Nocardioidaceae	Nocardioides	Unassigned
ASV1216	97	84	39	35	0	49	44	15	0	0	48	0	29	0	0	14	0	454	Bacteria{superkingdom}(100);{phylum}(100);{class}(100);{order}(100);{family}(100);{genus}(100);uncultured_Syntrophobacterales_bacterium{species}(100)	Bacteria						uncultured_Syntrophobacterales_bacterium
ASV1217	51	0	103	0	0	10	336	8	3	61	29	11	17	16	0	28	15	688	Bacteria{superkingdom}(100);Planctomycetes{phylum}(100);Planctomycetia{class}(100);Planctomycetales{order}(100);Planctomycetaceae{family}(100);Pirellula{genus}(100);Unassigned{species}(0)	Bacteria	Planctomycetes	Planctomycetia	Planctomycetales	Planctomycetaceae	Pirellula	Unassigned
ASV1218	0	0	0	60	0	80	0	0	0	0	0	0	0	56	0	73	27	296	Bacteria{superkingdom}(96);Chloroflexi{phylum}(96);{class}(96);{order}(96);{family}(96);{genus}(96);uncultured_Firmicutes_bacterium{species}(96)	Bacteria	Chloroflexi					uncultured_Firmicutes_bacterium
ASV1219	28	49	69	0	74	0	79	36	96	29	23	0	0	0	0	0	0	483	Bacteria{superkingdom}(100);Acidobacteria{phylum}(100);Acidobacteria_Gp6{class}(100);{order}(100);{family}(100);Gp6{genus}(100);Unassigned{species}(0)	Bacteria	Acidobacteria	Acidobacteria_Gp6			Gp6	Unassigned
ASV1221	61	0	0	0	0	16	0	0	0	0	0	0	0	0	0	0	0	77	Bacteria{superkingdom}(97);Proteobacteria{phylum}(97);Alphaproteobacteria{class}(97);Rhizobiales{order}(97);Phyllobacteriaceae{family}(97);Mesorhizobium{genus}(97);Unassigned{species}(0)	Bacteria	Proteobacteria	Alphaproteobacteria	Rhizobiales	Phyllobacteriaceae	Mesorhizobium	Unassigned
ASV1222	32	32	17	15	23	29	33	90	98	135	18	40	5	9	8	0	0	584	Bacteria{superkingdom}(91);Chloroflexi{phylum}(91);{class}(91);{order}(91);{family}(91);{genus}(91);uncultured_Sphaerobacter_sp.{species}(91)	Bacteria	Chloroflexi					uncultured_Sphaerobacter_sp.
ASV1223	7	41	29	19	55	68	41	24	8	23	0	0	43	0	0	36	0	394	Bacteria{superkingdom}(100);Proteobacteria{phylum}(100);Alphaproteobacteria{class}(100);Rhizobiales{order}(100);Rhodobiaceae{family}(100);Unassigned{genus}(0);Unassigned{species}(0)	Bacteria	Proteobacteria	Alphaproteobacteria	Rhizobiales	Rhodobiaceae	Unassigned	Unassigned
ASV1224	0	142	0	0	0	0	0	34	0	0	29	30	24	95	37	41	0	432	Bacteria{superkingdom}(100);Actinobacteria{phylum}(100);Unassigned{class}(0);Unassigned{order}(0);Unassigned{family}(0);Unassigned{genus}(0);Unassigned{species}(0)	Bacteria	Actinobacteria	Unassigned	Unassigned	Unassigned	Unassigned	Unassigned
ASV1225	0	0	0	0	0	38	15	0	0	0	0	0	39	0	0	0	0	92	Bacteria{superkingdom}(97);Chloroflexi{phylum}(97);{class}(97);{order}(97);{family}(97);{genus}(97);uncultured_sludge_bacterium_H8{species}(97)	Bacteria	Chloroflexi					uncultured_sludge_bacterium_H8
ASV1226	16	0	0	0	0	0	0	0	0	0	0	0	0	11	13	50	0	90	Bacteria{superkingdom}(100);Bacteroidetes{phylum}(100);Sphingobacteriia{class}(100);Sphingobacteriales{order}(100);Chitinophagaceae{family}(100);{genus}(100);Unassigned{species}(0)	Bacteria	Bacteroidetes	Sphingobacteriia	Sphingobacteriales	Chitinophagaceae		Unassigned
ASV1227	0	0	0	0	0	0	0	0	0	0	0	10	0	36	23	50	0	119	Bacteria{superkingdom}(99);Proteobacteria{phylum}(99);Alphaproteobacteria{class}(99);Rhizobiales{order}(99);Methylobacteriaceae{family}(99);Microvirga{genus}(99);Unassigned{species}(0)	Bacteria	Proteobacteria	Alphaproteobacteria	Rhizobiales	Methylobacteriaceae	Microvirga	Unassigned
ASV1229	0	0	15	50	0	27	41	47	0	21	59	16	74	21	0	0	36	407	Bacteria{superkingdom}(100);Proteobacteria{phylum}(100);Gammaproteobacteria{class}(100);Xanthomonadales{order}(100);Sinobacteraceae{family}(100);Fontimonas{genus}(100);uncultured_bacterium{species}(100)	Bacteria	Proteobacteria	Gammaproteobacteria	Xanthomonadales	Sinobacteraceae	Fontimonas	uncultured_bacterium
ASV1230	33	0	47	53	0	35	64	11	0	27	41	22	39	14	0	0	34	420	Bacteria{superkingdom}(98);Actinobacteria{phylum}(98);Actinobacteria{class}(98);Acidimicrobiales{order}(98);{family}(98);{genus}(98);Unassigned{species}(0)	Bacteria	Actinobacteria	Actinobacteria	Acidimicrobiales			Unassigned
ASV1231	12	0	41	13	74	95	0	0	0	0	0	11	0	0	0	0	6	252	Bacteria{superkingdom}(100);candidate_division_WPS-1{phylum}(100);{class}(100);{order}(100);{family}(100);WPS-1_genera_incertae_sedis{genus}(100);Unassigned{species}(0)	Bacteria	candidate_division_WPS-1				WPS-1_genera_incertae_sedis	Unassigned
ASV1232	124	0	76	40	193	35	0	0	0	0	0	0	14	0	0	6	0	488	Bacteria{superkingdom}(100);Planctomycetes{phylum}(100);Planctomycetia{class}(100);Planctomycetales{order}(100);Planctomycetaceae{family}(100);{genus}(100);Planctomycete_enrichment_culture_clone_Ac-C5{species}(100)	Bacteria	Planctomycetes	Planctomycetia	Planctomycetales	Planctomycetaceae		Planctomycete_enrichment_culture_clone_Ac-C5
ASV1233	0	0	0	0	20	0	0	0	0	0	0	0	0	0	0	0	0	20	Bacteria{superkingdom}(98);Proteobacteria{phylum}(98);Alphaproteobacteria{class}(98);Rhizobiales{order}(98);Phyllobacteriaceae{family}(98);Mesorhizobium{genus}(98);Unassigned{species}(0)	Bacteria	Proteobacteria	Alphaproteobacteria	Rhizobiales	Phyllobacteriaceae	Mesorhizobium	Unassigned
ASV1234	24	0	23	0	18	0	20	0	5	0	0	0	0	0	0	0	0	90	Bacteria{superkingdom}(86);Actinobacteria{phylum}(86);Actinobacteria{class}(86);Acidimicrobiales{order}(86);{family}(86);{genus}(86);uncultured_organism{species}(86)	Bacteria	Actinobacteria	Actinobacteria	Acidimicrobiales			uncultured_organism
ASV1235	19	26	32	0	64	38	313	22	20	0	32	0	0	0	0	0	40	606	Bacteria{superkingdom}(99);Actinobacteria{phylum}(99);Actinobacteria{class}(99);Acidimicrobiales{order}(99);Acidimicrobineae_incertae_sedis{family}(99);Aciditerrimonas{genus}(99);Unassigned{species}(0)	Bacteria	Actinobacteria	Actinobacteria	Acidimicrobiales	Acidimicrobineae_incertae_sedis	Aciditerrimonas	Unassigned
ASV1236	19	0	63	0	91	50	17	44	0	0	24	0	56	0	0	0	27	391	Bacteria{superkingdom}(100);Acidobacteria{phylum}(100);Acidobacteria_Gp4{class}(100);{order}(100);{family}(100);Unassigned{genus}(0);Unassigned{species}(0)	Bacteria	Acidobacteria	Acidobacteria_Gp4			Unassigned	Unassigned
ASV1239	0	281	74	0	0	94	109	44	94	80	0	0	0	0	0	0	0	776	Bacteria{superkingdom}(100);Gemmatimonadetes{phylum}(100);Gemmatimonadetes{class}(100);Gemmatimonadales{order}(100);Gemmatimonadaceae{family}(100);Gemmatimonas{genus}(100);Unassigned{species}(0)	Bacteria	Gemmatimonadetes	Gemmatimonadetes	Gemmatimonadales	Gemmatimonadaceae	Gemmatimonas	Unassigned
ASV1240	84	24	17	24	128	28	0	0	0	18	0	0	25	0	0	17	12	377	Bacteria{superkingdom}(99);Planctomycetes{phylum}(99);Planctomycetia{class}(99);Planctomycetales{order}(99);Planctomycetaceae{family}(99);{genus}(99);uncultured_Planctomyces_sp.{species}(99)	Bacteria	Planctomycetes	Planctomycetia	Planctomycetales	Planctomycetaceae		uncultured_Planctomyces_sp.
ASV1241	19	0	11	0	181	0	0	0	55	0	0	53	5	0	49	12	0	385	Bacteria{superkingdom}(100);Bacteroidetes{phylum}(100);Sphingobacteriia{class}(100);Sphingobacteriales{order}(100);Chitinophagaceae{family}(100);{genus}(100);agricultural_soil_bacterium_SC-I-64{species}(100)	Bacteria	Bacteroidetes	Sphingobacteriia	Sphingobacteriales	Chitinophagaceae		agricultural_soil_bacterium_SC-I-64
ASV1242	0	0	0	18	0	0	0	0	0	0	0	0	0	0	0	0	0	18	Bacteria{superkingdom}(99);Proteobacteria{phylum}(99);Gammaproteobacteria{class}(99);{order}(99);{family}(99);{genus}(99);Unassigned{species}(0)	Bacteria	Proteobacteria	Gammaproteobacteria				Unassigned
ASV1243	102	21	133	0	36	97	22	0	0	0	0	0	0	0	0	0	0	411	Bacteria{superkingdom}(85);Acidobacteria{phylum}(85);Acidobacteria_Gp25{class}(85);{order}(85);{family}(85);Gp25{genus}(85);uncultured_Syntrophobacter_sp.{species}(85)	Bacteria	Acidobacteria	Acidobacteria_Gp25			Gp25	uncultured_Syntrophobacter_sp.
ASV1244	208	0	39	0	0	91	0	0	0	0	0	0	0	0	0	0	0	338	Bacteria{superkingdom}(100);Armatimonadetes{phylum}(100);{class}(100);{order}(100);{family}(100);Armatimonadetes_gp4{genus}(100);uncultured_candidate_division_OP10_bacterium{species}(100)	Bacteria	Armatimonadetes				Armatimonadetes_gp4	uncultured_candidate_division_OP10_bacterium
ASV1245	152	44	109	70	118	0	0	0	0	0	0	0	0	0	0	0	0	493	Bacteria{superkingdom}(94);Firmicutes{phylum}(94);Bacilli{class}(94);Bacillales{order}(94);Bacillaceae_1{family}(94);Bacillus{genus}(94);Unassigned{species}(0)	Bacteria	Firmicutes	Bacilli	Bacillales	Bacillaceae_1	Bacillus	Unassigned
ASV1246	0	79	0	0	0	0	0	0	0	0	0	37	0	0	16	0	0	132	Bacteria{superkingdom}(100);Acidobacteria{phylum}(100);Acidobacteria_Gp4{class}(100);{order}(100);{family}(100);Unassigned{genus}(0);Unassigned{species}(0)	Bacteria	Acidobacteria	Acidobacteria_Gp4			Unassigned	Unassigned
ASV1247	0	0	0	0	0	35	0	17	32	0	14	0	0	0	0	9	0	107	Bacteria{superkingdom}(100);Unassigned{phylum}(0);Unassigned{class}(0);Unassigned{order}(0);Unassigned{family}(0);Unassigned{genus}(0);Unassigned{species}(0)	Bacteria	Unassigned	Unassigned	Unassigned	Unassigned	Unassigned	Unassigned
ASV1248	32	0	11	0	0	0	45	409	15	111	0	46	0	0	0	57	0	726	Bacteria{superkingdom}(100);Actinobacteria{phylum}(100);Unassigned{class}(0);Unassigned{order}(0);Unassigned{family}(0);Unassigned{genus}(0);Unassigned{species}(0)	Bacteria	Actinobacteria	Unassigned	Unassigned	Unassigned	Unassigned	Unassigned
ASV1249	0	149	15	0	14	0	265	16	18	8	0	39	0	0	0	0	0	524	Bacteria{superkingdom}(88);Actinobacteria{phylum}(88);Actinobacteria{class}(88);Acidimicrobiales{order}(88);Acidimicrobineae_incertae_sedis{family}(88);Aciditerrimonas{genus}(88);Unassigned{species}(0)	Bacteria	Actinobacteria	Actinobacteria	Acidimicrobiales	Acidimicrobineae_incertae_sedis	Aciditerrimonas	Unassigned
ASV1250	25	0	0	44	0	28	57	0	0	0	0	0	0	0	0	0	0	154	Bacteria{superkingdom}(100);Acidobacteria{phylum}(100);Acidobacteria_Gp7{class}(100);{order}(100);{family}(100);Gp7{genus}(100);Unassigned{species}(0)	Bacteria	Acidobacteria	Acidobacteria_Gp7			Gp7	Unassigned
ASV1251	0	24	0	36	0	0	0	0	0	0	0	0	0	0	0	36	0	96	Bacteria{superkingdom}(100);Actinobacteria{phylum}(100);Actinobacteria{class}(100);Actinomycetales{order}(100);Nocardioidaceae{family}(100);Kribbella{genus}(100);Unassigned{species}(0)	Bacteria	Actinobacteria	Actinobacteria	Actinomycetales	Nocardioidaceae	Kribbella	Unassigned
ASV1252	0	0	0	0	0	0	0	0	0	0	0	0	0	0	0	8	0	8	Bacteria{superkingdom}(100);Proteobacteria{phylum}(100);Gammaproteobacteria{class}(100);Unassigned{order}(0);Unassigned{family}(0);Unassigned{genus}(0);Unassigned{species}(0)	Bacteria	Proteobacteria	Gammaproteobacteria	Unassigned	Unassigned	Unassigned	Unassigned
ASV1253	0	317	18	0	59	0	0	0	0	0	0	0	0	0	0	0	0	394	Bacteria{superkingdom}(84);Actinobacteria{phylum}(84);Actinobacteria{class}(84);Solirubrobacterales{order}(84);Unassigned{family}(0);Unassigned{genus}(0);Unassigned{species}(0)	Bacteria	Actinobacteria	Actinobacteria	Solirubrobacterales	Unassigned	Unassigned	Unassigned
ASV1254	33	0	0	0	0	0	0	0	0	0	0	0	0	0	0	0	0	33	Bacteria{superkingdom}(100);Actinobacteria{phylum}(100);Actinobacteria{class}(100);Actinomycetales{order}(100);Micromonosporaceae{family}(100);Unassigned{genus}(0);Unassigned{species}(0)	Bacteria	Actinobacteria	Actinobacteria	Actinomycetales	Micromonosporaceae	Unassigned	Unassigned
ASV1255	27	0	0	10	32	63	0	0	0	0	0	0	0	0	0	0	0	132	Bacteria{superkingdom}(100);Actinobacteria{phylum}(100);Actinobacteria{class}(100);Gaiellales{order}(100);Gaiellaceae{family}(100);Gaiella{genus}(100);Unassigned{species}(0)	Bacteria	Actinobacteria	Actinobacteria	Gaiellales	Gaiellaceae	Gaiella	Unassigned
ASV1256	207	0	33	45	69	0	0	0	0	22	0	36	0	0	0	0	0	412	Bacteria{superkingdom}(91);Proteobacteria{phylum}(91);Betaproteobacteria{class}(91);Burkholderiales{order}(91);Oxalobacteraceae{family}(91);Massilia{genus}(91);Unassigned{species}(0)	Bacteria	Proteobacteria	Betaproteobacteria	Burkholderiales	Oxalobacteraceae	Massilia	Unassigned
ASV1257	0	27	0	0	0	0	0	0	0	0	0	14	0	33	0	37	0	111	Bacteria{superkingdom}(100);Actinobacteria{phylum}(100);Actinobacteria{class}(100);Actinomycetales{order}(100);Pseudonocardiaceae{family}(100);Actinomycetospora{genus}(100);Unassigned{species}(0)	Bacteria	Actinobacteria	Actinobacteria	Actinomycetales	Pseudonocardiaceae	Actinomycetospora	Unassigned
ASV1258	141	74	22	0	287	36	0	0	83	0	0	0	0	0	23	0	0	666	Bacteria{superkingdom}(100);Proteobacteria{phylum}(100);Deltaproteobacteria{class}(100);{order}(100);{family}(100);{genus}(100);uncultured_Syntrophobacterales_bacterium{species}(100)	Bacteria	Proteobacteria	Deltaproteobacteria				uncultured_Syntrophobacterales_bacterium
ASV1259	80	0	108	220	91	68	0	0	0	0	0	0	59	17	0	0	0	643	Bacteria{superkingdom}(100);Planctomycetes{phylum}(100);Planctomycetia{class}(100);Planctomycetales{order}(100);Planctomycetaceae{family}(100);{genus}(100);Planctomycete_enrichment_culture_clone_Ac-C5{species}(100)	Bacteria	Planctomycetes	Planctomycetia	Planctomycetales	Planctomycetaceae		Planctomycete_enrichment_culture_clone_Ac-C5
ASV1260	12	0	0	0	0	0	0	0	0	46	0	17	0	33	0	59	0	167	Bacteria{superkingdom}(100);Actinobacteria{phylum}(100);Actinobacteria{class}(100);Actinomycetales{order}(100);Pseudonocardiaceae{family}(100);Pseudonocardia{genus}(100);Unassigned{species}(0)	Bacteria	Actinobacteria	Actinobacteria	Actinomycetales	Pseudonocardiaceae	Pseudonocardia	Unassigned
ASV1261	0	0	15	0	0	29	7	4	54	15	32	7	33	18	7	0	26	247	Bacteria{superkingdom}(98);Proteobacteria{phylum}(98);Betaproteobacteria{class}(98);{order}(98);{family}(98);{genus}(98);Unassigned{species}(0)	Bacteria	Proteobacteria	Betaproteobacteria				Unassigned
ASV1262	23	0	9	12	64	0	301	35	135	28	352	0	0	0	0	0	11	970	Bacteria{superkingdom}(84);Chloroflexi{phylum}(84);Anaerolineae{class}(84);Anaerolineales{order}(84);Anaerolineaceae{family}(84);{genus}(84);Unassigned{species}(0)	Bacteria	Chloroflexi	Anaerolineae	Anaerolineales	Anaerolineaceae		Unassigned
ASV1263	0	49	0	0	12	0	28	9	38	16	0	58	0	0	0	0	0	210	Bacteria{superkingdom}(80);Proteobacteria{phylum}(80);Betaproteobacteria{class}(80);Burkholderiales{order}(80);Burkholderiaceae{family}(80);Lautropia{genus}(80);uncultured_Derxia_sp.{species}(80)	Bacteria	Proteobacteria	Betaproteobacteria	Burkholderiales	Burkholderiaceae	Lautropia	uncultured_Derxia_sp.
ASV1264	0	0	53	167	153	159	34	5	15	13	12	0	0	0	19	0	0	630	Bacteria{superkingdom}(100);Firmicutes{phylum}(100);Bacilli{class}(100);Bacillales{order}(100);Paenibacillaceae_1{family}(100);Paenibacillus{genus}(100);Unassigned{species}(0)	Bacteria	Firmicutes	Bacilli	Bacillales	Paenibacillaceae_1	Paenibacillus	Unassigned
ASV1265	27	0	72	0	27	11	56	12	7	0	21	33	0	0	80	0	0	346	Bacteria{superkingdom}(85);Actinobacteria{phylum}(85);Actinobacteria{class}(85);Gaiellales{order}(85);Gaiellaceae{family}(85);Gaiella{genus}(85);uncultured_actinobacterium{species}(85)	Bacteria	Actinobacteria	Actinobacteria	Gaiellales	Gaiellaceae	Gaiella	uncultured_actinobacterium
ASV1267	14	0	11	46	59	40	14	3	0	0	0	15	0	0	0	0	0	202	Bacteria{superkingdom}(89);Chloroflexi{phylum}(89);Anaerolineae{class}(89);Anaerolineales{order}(89);Anaerolineaceae{family}(89);{genus}(89);Unassigned{species}(0)	Bacteria	Chloroflexi	Anaerolineae	Anaerolineales	Anaerolineaceae		Unassigned
ASV1268	0	34	0	0	0	0	0	0	9	8	0	0	0	0	0	18	0	69	Bacteria{superkingdom}(84);Bacteroidetes{phylum}(84);Sphingobacteriia{class}(84);Sphingobacteriales{order}(84);Chitinophagaceae{family}(84);Flavisolibacter{genus}(84);Unassigned{species}(0)	Bacteria	Bacteroidetes	Sphingobacteriia	Sphingobacteriales	Chitinophagaceae	Flavisolibacter	Unassigned
ASV1269	0	464	0	0	0	0	0	0	0	0	0	0	0	0	0	0	0	464	Bacteria{superkingdom}(97);Acidobacteria{phylum}(97);Acidobacteria_Gp6{class}(97);{order}(97);{family}(97);Gp6{genus}(97);Unassigned{species}(0)	Bacteria	Acidobacteria	Acidobacteria_Gp6			Gp6	Unassigned
ASV1270	0	283	0	0	0	0	94	0	0	0	75	0	559	0	0	0	45	1056	Bacteria{superkingdom}(90);Actinobacteria{phylum}(90);Actinobacteria{class}(90);Solirubrobacterales{order}(90);{family}(90);{genus}(90);Unassigned{species}(0)	Bacteria	Actinobacteria	Actinobacteria	Solirubrobacterales			Unassigned
ASV1271	0	144	0	0	0	0	0	0	0	0	0	0	0	0	0	0	0	144	Bacteria{superkingdom}(100);Proteobacteria{phylum}(100);Betaproteobacteria{class}(100);{order}(100);{family}(100);{genus}(100);Unassigned{species}(0)	Bacteria	Proteobacteria	Betaproteobacteria				Unassigned
ASV1272	52	0	55	0	0	0	87	151	162	0	0	74	0	0	0	0	96	677	Bacteria{superkingdom}(100);Actinobacteria{phylum}(100);Actinobacteria{class}(100);Solirubrobacterales{order}(100);Unassigned{family}(0);Unassigned{genus}(0);Unassigned{species}(0)	Bacteria	Actinobacteria	Actinobacteria	Solirubrobacterales	Unassigned	Unassigned	Unassigned
ASV1273	42	0	0	0	50	16	0	0	3	0	0	0	0	0	0	0	0	111	Bacteria{superkingdom}(98);Chloroflexi{phylum}(98);Anaerolineae{class}(98);Anaerolineales{order}(98);Anaerolineaceae{family}(98);{genus}(98);Unassigned{species}(0)	Bacteria	Chloroflexi	Anaerolineae	Anaerolineales	Anaerolineaceae		Unassigned
ASV1274	0	0	24	30	0	0	0	23	25	55	0	37	79	0	21	0	28	322	Bacteria{superkingdom}(100);{phylum}(100);{class}(100);{order}(100);{family}(100);{genus}(100);uncultured_Actinomyces_sp.{species}(100)	Bacteria						uncultured_Actinomyces_sp.
ASV1275	0	76	15	0	83	0	0	0	0	0	0	0	0	0	0	0	36	210	Bacteria{superkingdom}(100);Bacteroidetes{phylum}(100);Cytophagia{class}(100);Cytophagales{order}(100);{family}(100);Ohtaekwangia{genus}(100);Unassigned{species}(0)	Bacteria	Bacteroidetes	Cytophagia	Cytophagales		Ohtaekwangia	Unassigned
ASV1276	48	19	53	37	52	43	0	0	0	0	0	0	0	0	0	0	0	252	Bacteria{superkingdom}(93);Planctomycetes{phylum}(93);Planctomycetia{class}(93);Planctomycetales{order}(93);Planctomycetaceae{family}(93);Blastopirellula{genus}(93);uncultured_bacterium{species}(93)	Bacteria	Planctomycetes	Planctomycetia	Planctomycetales	Planctomycetaceae	Blastopirellula	uncultured_bacterium
ASV1278	0	44	0	0	0	0	0	0	0	22	0	0	0	0	0	4	0	70	Bacteria{superkingdom}(100);Actinobacteria{phylum}(100);Actinobacteria{class}(100);Actinomycetales{order}(100);Pseudonocardiaceae{family}(100);Pseudonocardia{genus}(100);Unassigned{species}(0)	Bacteria	Actinobacteria	Actinobacteria	Actinomycetales	Pseudonocardiaceae	Pseudonocardia	Unassigned
ASV1281	76	0	6	0	18	12	0	0	6	0	0	0	0	0	0	0	0	118	Bacteria{superkingdom}(99);{phylum}(99);{class}(99);{order}(99);{family}(99);{genus}(99);uncultured_Gemmatimonadetes_bacterium{species}(99)	Bacteria						uncultured_Gemmatimonadetes_bacterium
ASV1282	98	0	0	0	0	80	0	0	0	0	9	0	0	0	0	0	0	187	Bacteria{superkingdom}(100);Bacteroidetes{phylum}(100);Sphingobacteriia{class}(100);Sphingobacteriales{order}(100);Chitinophagaceae{family}(100);Unassigned{genus}(0);Unassigned{species}(0)	Bacteria	Bacteroidetes	Sphingobacteriia	Sphingobacteriales	Chitinophagaceae	Unassigned	Unassigned
ASV1283	76	0	22	0	118	0	0	0	41	0	0	0	0	0	0	0	0	257	Bacteria{superkingdom}(100);Planctomycetes{phylum}(100);Planctomycetia{class}(100);Planctomycetales{order}(100);Planctomycetaceae{family}(100);Unassigned{genus}(0);Unassigned{species}(0)	Bacteria	Planctomycetes	Planctomycetia	Planctomycetales	Planctomycetaceae	Unassigned	Unassigned
ASV1284	12	0	0	26	0	17	0	0	0	0	0	0	0	9	7	6	0	77	Bacteria{superkingdom}(100);Chloroflexi{phylum}(100);Anaerolineae{class}(100);Anaerolineales{order}(100);Anaerolineaceae{family}(100);{genus}(100);unidentified_marine_bacterioplankton{species}(100)	Bacteria	Chloroflexi	Anaerolineae	Anaerolineales	Anaerolineaceae		unidentified_marine_bacterioplankton
ASV1285	24	136	11	0	0	0	147	61	0	0	38	0	0	0	49	34	70	570	Bacteria{superkingdom}(97);Actinobacteria{phylum}(97);Actinobacteria{class}(97);Acidimicrobiales{order}(97);Acidimicrobineae_incertae_sedis{family}(97);Aciditerrimonas{genus}(97);Unassigned{species}(0)	Bacteria	Actinobacteria	Actinobacteria	Acidimicrobiales	Acidimicrobineae_incertae_sedis	Aciditerrimonas	Unassigned
ASV1286	0	564	47	0	0	0	461	66	266	188	0	0	0	0	0	0	0	1592	Bacteria{superkingdom}(100);{phylum}(100);{class}(100);{order}(100);{family}(100);{genus}(100);uncultured_Syntrophobacterales_bacterium{species}(100)	Bacteria						uncultured_Syntrophobacterales_bacterium
ASV1287	0	0	11	0	0	0	0	0	0	15	0	0	0	4	0	9	12	51	Bacteria{superkingdom}(96);Candidatus_Saccharibacteria{phylum}(96);{class}(96);{order}(96);{family}(96);Saccharibacteria_genera_incertae_sedis{genus}(96);uncultured_candidate_division_TM7_bacterium{species}(96)	Bacteria	Candidatus_Saccharibacteria				Saccharibacteria_genera_incertae_sedis	uncultured_candidate_division_TM7_bacterium
ASV1288	44	0	46	0	25	39	0	0	0	0	0	0	0	0	0	0	0	154	Bacteria{superkingdom}(90);Acidobacteria{phylum}(90);Acidobacteria_Gp16{class}(90);{order}(90);{family}(90);Gp16{genus}(90);uncultured_Chloroflexi_bacterium{species}(90)	Bacteria	Acidobacteria	Acidobacteria_Gp16			Gp16	uncultured_Chloroflexi_bacterium
ASV1289	40	696	28	31	52	24	14	43	8	14	55	12	74	5	0	0	16	1112	Bacteria{superkingdom}(94);Proteobacteria{phylum}(94);Deltaproteobacteria{class}(94);Myxococcales{order}(94);Cystobacteraceae{family}(94);{genus}(94);uncultured_delta_proteobacterium{species}(94)	Bacteria	Proteobacteria	Deltaproteobacteria	Myxococcales	Cystobacteraceae		uncultured_delta_proteobacterium
ASV1290	29	0	11	0	43	108	18	7	0	0	0	0	19	0	0	0	0	235	Bacteria{superkingdom}(100);Proteobacteria{phylum}(100);Deltaproteobacteria{class}(100);Myxococcales{order}(100);Polyangiaceae{family}(100);{genus}(100);uncultured_Myxococcales_bacterium{species}(100)	Bacteria	Proteobacteria	Deltaproteobacteria	Myxococcales	Polyangiaceae		uncultured_Myxococcales_bacterium
ASV1291	23	0	25	76	108	123	0	0	0	0	0	0	0	0	0	0	0	355	Bacteria{superkingdom}(91);Planctomycetes{phylum}(91);Phycisphaerae{class}(91);{order}(91);{family}(91);{genus}(91);uncultured_Planctomycetales_bacterium_HF0500_02G17{species}(91)	Bacteria	Planctomycetes	Phycisphaerae				uncultured_Planctomycetales_bacterium_HF0500_02G17
ASV1292	42	0	22	6	43	32	0	0	0	0	0	0	0	18	0	18	0	181	Bacteria{superkingdom}(90);Chloroflexi{phylum}(90);Thermomicrobia{class}(90);Sphaerobacterales{order}(90);Sphaerobacteraceae{family}(90);{genus}(90);Unassigned{species}(0)	Bacteria	Chloroflexi	Thermomicrobia	Sphaerobacterales	Sphaerobacteraceae		Unassigned
ASV1293	29	14	20	14	23	0	48	177	45	152	17	66	27	28	0	31	106	797	Bacteria{superkingdom}(99);Chloroflexi{phylum}(99);Chloroflexia{class}(99);{order}(99);{family}(99);{genus}(99);uncultured_bacterium{species}(99)	Bacteria	Chloroflexi	Chloroflexia				uncultured_bacterium
ASV1295	33	34	88	7	67	28	131	54	101	28	9	0	0	0	0	0	9	589	Bacteria{superkingdom}(96);Acidobacteria{phylum}(96);Acidobacteria_Gp3{class}(96);{order}(96);{family}(96);Gp3{genus}(96);uncultured_Candidatus_Solibacter_sp.{species}(96)	Bacteria	Acidobacteria	Acidobacteria_Gp3			Gp3	uncultured_Candidatus_Solibacter_sp.
ASV1296	0	368	0	0	0	0	0	0	0	0	15	0	0	0	0	0	57	440	Bacteria{superkingdom}(81);Actinobacteria{phylum}(81);Actinobacteria{class}(81);Acidimicrobiales{order}(81);Iamiaceae{family}(81);{genus}(81);Unassigned{species}(0)	Bacteria	Actinobacteria	Actinobacteria	Acidimicrobiales	Iamiaceae		Unassigned
ASV1297	20	0	26	17	55	0	18	0	36	19	0	10	16	30	26	15	31	319	Bacteria{superkingdom}(89);Proteobacteria{phylum}(89);Alphaproteobacteria{class}(89);Rhizobiales{order}(89);Hyphomicrobiaceae{family}(89);Prosthecomicrobium{genus}(89);uncultured_alpha_proteobacterium{species}(89)	Bacteria	Proteobacteria	Alphaproteobacteria	Rhizobiales	Hyphomicrobiaceae	Prosthecomicrobium	uncultured_alpha_proteobacterium
ASV1298	55	0	56	13	140	114	40	34	19	0	20	42	102	38	0	0	57	730	Bacteria{superkingdom}(94);Proteobacteria{phylum}(94);Alphaproteobacteria{class}(94);Sphingomonadales{order}(94);Sphingomonadaceae{family}(94);Sphingomonas{genus}(94);Unassigned{species}(0)	Bacteria	Proteobacteria	Alphaproteobacteria	Sphingomonadales	Sphingomonadaceae	Sphingomonas	Unassigned
ASV1299	0	0	6	0	0	0	0	0	0	0	0	0	0	0	0	23	0	29	Bacteria{superkingdom}(100);{phylum}(100);{class}(100);{order}(100);{family}(100);{genus}(100);uncultured_Gemmatimonadetes_bacterium{species}(100)	Bacteria						uncultured_Gemmatimonadetes_bacterium
ASV1300	0	0	0	11	0	0	0	0	0	0	0	0	0	56	18	25	0	110	Bacteria{superkingdom}(100);Bacteroidetes{phylum}(100);Cytophagia{class}(100);Cytophagales{order}(100);{family}(100);Ohtaekwangia{genus}(100);Unassigned{species}(0)	Bacteria	Bacteroidetes	Cytophagia	Cytophagales		Ohtaekwangia	Unassigned
ASV1301	0	0	0	0	0	40	53	0	0	76	0	0	0	0	0	0	58	227	Bacteria{superkingdom}(95);Proteobacteria{phylum}(95);Deltaproteobacteria{class}(95);Myxococcales{order}(95);{family}(95);{genus}(95);Unassigned{species}(0)	Bacteria	Proteobacteria	Deltaproteobacteria	Myxococcales			Unassigned
ASV1302	57	99	63	5	148	31	0	57	70	12	0	11	0	0	0	0	0	553	Bacteria{superkingdom}(99);Chloroflexi{phylum}(99);Chloroflexia{class}(99);{order}(99);{family}(99);{genus}(99);uncultured_bacterium{species}(99)	Bacteria	Chloroflexi	Chloroflexia				uncultured_bacterium
ASV1303	0	0	0	0	0	0	0	0	0	0	0	0	0	0	0	0	4	4	Bacteria{superkingdom}(100);Acidobacteria{phylum}(100);Acidobacteria_Gp6{class}(100);{order}(100);{family}(100);Gp6{genus}(100);Unassigned{species}(0)	Bacteria	Acidobacteria	Acidobacteria_Gp6			Gp6	Unassigned
ASV1304	0	0	0	0	0	0	40	30	0	51	0	0	0	0	0	0	0	121	Bacteria{superkingdom}(100);Proteobacteria{phylum}(100);Gammaproteobacteria{class}(100);Unassigned{order}(0);Unassigned{family}(0);Unassigned{genus}(0);Unassigned{species}(0)	Bacteria	Proteobacteria	Gammaproteobacteria	Unassigned	Unassigned	Unassigned	Unassigned
ASV1305	0	101	0	0	0	0	0	8	22	56	27	0	0	0	0	0	0	214	Bacteria{superkingdom}(89);Actinobacteria{phylum}(89);Actinobacteria{class}(89);Acidimicrobiales{order}(89);Acidimicrobineae_incertae_sedis{family}(89);Aciditerrimonas{genus}(89);uncultured_bacterium{species}(89)	Bacteria	Actinobacteria	Actinobacteria	Acidimicrobiales	Acidimicrobineae_incertae_sedis	Aciditerrimonas	uncultured_bacterium
ASV1306	0	0	0	6	0	0	18	0	0	0	0	0	10	0	1	13	9	57	Bacteria{superkingdom}(84);Bacteroidetes{phylum}(84);Cytophagia{class}(84);Cytophagales{order}(84);Cytophagaceae{family}(84);Dyadobacter{genus}(84);Dyadobacter_fermentans{species}(84)	Bacteria	Bacteroidetes	Cytophagia	Cytophagales	Cytophagaceae	Dyadobacter	Dyadobacter_fermentans
ASV1308	90	0	8	117	0	88	0	0	0	0	0	0	0	0	0	0	0	303	Bacteria{superkingdom}(88);Proteobacteria{phylum}(88);Gammaproteobacteria{class}(88);Xanthomonadales{order}(88);Sinobacteraceae{family}(88);Povalibacter{genus}(88);uncultured_bacterium{species}(88)	Bacteria	Proteobacteria	Gammaproteobacteria	Xanthomonadales	Sinobacteraceae	Povalibacter	uncultured_bacterium
ASV1309	37	0	0	37	52	28	19	14	14	41	0	32	212	0	0	14	14	514	Bacteria{superkingdom}(83);Acidobacteria{phylum}(83);Acidobacteria_Gp3{class}(83);{order}(83);{family}(83);Gp3{genus}(83);Unassigned{species}(0)	Bacteria	Acidobacteria	Acidobacteria_Gp3			Gp3	Unassigned
ASV1310	0	0	0	15	0	0	0	45	30	51	0	136	0	0	0	0	0	277	Bacteria{superkingdom}(87);Actinobacteria{phylum}(87);Actinobacteria{class}(87);Unassigned{order}(0);Unassigned{family}(0);Unassigned{genus}(0);Unassigned{species}(0)	Bacteria	Actinobacteria	Actinobacteria	Unassigned	Unassigned	Unassigned	Unassigned
ASV1312	52	31	46	29	59	49	15	31	32	19	0	16	8	21	0	0	41	449	Bacteria{superkingdom}(95);Proteobacteria{phylum}(95);Alphaproteobacteria{class}(95);Rhodospirillales{order}(95);Rhodospirillaceae{family}(95);{genus}(95);uncultured_Nitrobacter_sp.{species}(95)	Bacteria	Proteobacteria	Alphaproteobacteria	Rhodospirillales	Rhodospirillaceae		uncultured_Nitrobacter_sp.
ASV1313	0	0	0	11	0	0	0	0	0	0	0	0	0	0	0	0	0	11	Bacteria{superkingdom}(100);Actinobacteria{phylum}(100);Actinobacteria{class}(100);Actinomycetales{order}(100);Promicromonosporaceae{family}(100);Promicromonospora{genus}(100);Unassigned{species}(0)	Bacteria	Actinobacteria	Actinobacteria	Actinomycetales	Promicromonosporaceae	Promicromonospora	Unassigned
ASV1314	0	0	34	0	41	33	0	0	0	0	0	0	0	0	105	0	0	213	Bacteria{superkingdom}(82);Proteobacteria{phylum}(82);Deltaproteobacteria{class}(82);Myxococcales{order}(82);Polyangiaceae{family}(82);Byssovorax{genus}(82);uncultured_bacterium{species}(82)	Bacteria	Proteobacteria	Deltaproteobacteria	Myxococcales	Polyangiaceae	Byssovorax	uncultured_bacterium
ASV1315	0	67	9	0	0	0	21	23	110	64	0	24	33	182	128	22	46	729	Bacteria{superkingdom}(100);Bacteroidetes{phylum}(100);Sphingobacteriia{class}(100);Sphingobacteriales{order}(100);Chitinophagaceae{family}(100);Unassigned{genus}(0);Unassigned{species}(0)	Bacteria	Bacteroidetes	Sphingobacteriia	Sphingobacteriales	Chitinophagaceae	Unassigned	Unassigned
ASV1316	0	0	0	16	18	0	0	67	33	187	0	41	45	77	178	7	63	732	Bacteria{superkingdom}(90);Actinobacteria{phylum}(90);Actinobacteria{class}(90);{order}(90);{family}(90);{genus}(90);uncultured_Frankia_sp.{species}(90)	Bacteria	Actinobacteria	Actinobacteria				uncultured_Frankia_sp.
ASV1317	16	0	27	0	0	0	115	83	98	56	0	44	0	0	0	0	37	476	Bacteria{superkingdom}(88);Actinobacteria{phylum}(88);Actinobacteria{class}(88);Actinomycetales{order}(88);Propionibacteriaceae{family}(88);Microlunatus{genus}(88);Unassigned{species}(0)	Bacteria	Actinobacteria	Actinobacteria	Actinomycetales	Propionibacteriaceae	Microlunatus	Unassigned
ASV1318	0	34	0	0	0	0	0	0	0	0	0	0	0	0	0	0	0	34	Bacteria{superkingdom}(87);Proteobacteria{phylum}(87);Alphaproteobacteria{class}(87);Rhizobiales{order}(87);Rhizobiales_incertae_sedis{family}(87);Variibacter{genus}(87);Unassigned{species}(0)	Bacteria	Proteobacteria	Alphaproteobacteria	Rhizobiales	Rhizobiales_incertae_sedis	Variibacter	Unassigned
ASV1319	83	0	32	0	55	38	31	23	0	0	0	0	0	0	19	0	0	281	Bacteria{superkingdom}(100);Actinobacteria{phylum}(100);Actinobacteria{class}(100);Gaiellales{order}(100);Gaiellaceae{family}(100);Gaiella{genus}(100);Unassigned{species}(0)	Bacteria	Actinobacteria	Actinobacteria	Gaiellales	Gaiellaceae	Gaiella	Unassigned
ASV1320	134	8	32	0	57	53	0	0	0	0	0	0	0	0	0	0	0	284	Bacteria{superkingdom}(100);Acidobacteria{phylum}(100);Acidobacteria_Gp6{class}(100);{order}(100);{family}(100);Gp6{genus}(100);Unassigned{species}(0)	Bacteria	Acidobacteria	Acidobacteria_Gp6			Gp6	Unassigned
ASV1321	0	0	47	0	0	0	0	0	0	0	0	0	0	0	0	0	0	47	Bacteria{superkingdom}(100);Acidobacteria{phylum}(100);Acidobacteria_Gp6{class}(100);{order}(100);{family}(100);Gp6{genus}(100);Unassigned{species}(0)	Bacteria	Acidobacteria	Acidobacteria_Gp6			Gp6	Unassigned
ASV1322	33	0	21	34	79	32	21	9	15	0	0	0	0	0	0	0	0	244	Bacteria{superkingdom}(89);Proteobacteria{phylum}(89);Alphaproteobacteria{class}(89);Rhizobiales{order}(89);{family}(89);{genus}(89);Unassigned{species}(0)	Bacteria	Proteobacteria	Alphaproteobacteria	Rhizobiales			Unassigned
ASV1323	31	0	0	0	20	0	11	0	69	55	0	0	0	0	0	0	0	186	Bacteria{superkingdom}(97);Chloroflexi{phylum}(97);Anaerolineae{class}(97);Anaerolineales{order}(97);Anaerolineaceae{family}(97);{genus}(97);uncultured_Gemmatimonadetes_bacterium{species}(97)	Bacteria	Chloroflexi	Anaerolineae	Anaerolineales	Anaerolineaceae		uncultured_Gemmatimonadetes_bacterium
ASV1325	72	0	32	0	45	35	31	89	51	0	0	0	0	0	0	0	0	355	Bacteria{superkingdom}(84);Proteobacteria{phylum}(84);Alphaproteobacteria{class}(84);Rhizobiales{order}(84);Rhodobiaceae{family}(84);{genus}(84);Unassigned{species}(0)	Bacteria	Proteobacteria	Alphaproteobacteria	Rhizobiales	Rhodobiaceae		Unassigned
ASV1326	21	0	0	46	23	0	132	0	40	47	59	0	153	32	0	0	0	553	Bacteria{superkingdom}(98);Proteobacteria{phylum}(98);Deltaproteobacteria{class}(98);{order}(98);{family}(98);{genus}(98);Unassigned{species}(0)	Bacteria	Proteobacteria	Deltaproteobacteria				Unassigned
ASV1327	32	0	0	0	0	20	0	0	0	0	0	0	0	0	0	0	0	52	Bacteria{superkingdom}(100);Proteobacteria{phylum}(100);Deltaproteobacteria{class}(100);Myxococcales{order}(100);Sandaracinaceae{family}(100);Sandaracinus{genus}(100);delta_proteobacterium_WY32{species}(100)	Bacteria	Proteobacteria	Deltaproteobacteria	Myxococcales	Sandaracinaceae	Sandaracinus	delta_proteobacterium_WY32
ASV1328	0	0	0	0	0	0	4	0	214	68	192	0	0	0	0	0	0	478	Bacteria{superkingdom}(100);Bacteroidetes{phylum}(100);Sphingobacteriia{class}(100);Sphingobacteriales{order}(100);Chitinophagaceae{family}(100);Unassigned{genus}(0);Unassigned{species}(0)	Bacteria	Bacteroidetes	Sphingobacteriia	Sphingobacteriales	Chitinophagaceae	Unassigned	Unassigned
ASV1329	0	0	0	0	16	8	0	0	0	0	0	0	0	0	0	0	0	24	Bacteria{superkingdom}(91);Candidatus_Saccharibacteria{phylum}(91);{class}(91);{order}(91);{family}(91);Saccharibacteria_genera_incertae_sedis{genus}(91);uncultured_bacterium{species}(91)	Bacteria	Candidatus_Saccharibacteria				Saccharibacteria_genera_incertae_sedis	uncultured_bacterium
ASV1330	39	106	23	39	48	6	0	0	0	31	9	21	0	19	15	15	7	378	Bacteria{superkingdom}(100);candidate_division_WPS-1{phylum}(100);{class}(100);{order}(100);{family}(100);WPS-1_genera_incertae_sedis{genus}(100);Unassigned{species}(0)	Bacteria	candidate_division_WPS-1				WPS-1_genera_incertae_sedis	Unassigned
ASV1331	46	176	18	18	0	23	0	3	0	0	0	0	0	0	0	0	0	284	Bacteria{superkingdom}(100);{phylum}(100);{class}(100);{order}(100);{family}(100);{genus}(100);Unassigned{species}(0)	Bacteria						Unassigned
ASV1332	31	0	0	0	0	33	0	0	0	0	0	0	0	0	0	0	9	73	Bacteria{superkingdom}(100);Chloroflexi{phylum}(100);{class}(100);{order}(100);{family}(100);{genus}(100);uncultured_sludge_bacterium_S14{species}(100)	Bacteria	Chloroflexi					uncultured_sludge_bacterium_S14
ASV1333	37	0	48	0	0	47	40	0	0	0	0	0	0	0	0	0	0	172	Bacteria{superkingdom}(100);Planctomycetes{phylum}(100);Planctomycetia{class}(100);Planctomycetales{order}(100);Planctomycetaceae{family}(100);Unassigned{genus}(0);Unassigned{species}(0)	Bacteria	Planctomycetes	Planctomycetia	Planctomycetales	Planctomycetaceae	Unassigned	Unassigned
ASV1334	0	0	0	0	0	0	8	0	0	0	0	0	0	0	0	0	0	8	Bacteria{superkingdom}(100);Chloroflexi{phylum}(100);{class}(100);{order}(100);{family}(100);{genus}(100);uncultured_sludge_bacterium_S14{species}(100)	Bacteria	Chloroflexi					uncultured_sludge_bacterium_S14
ASV1335	0	0	0	0	0	0	0	0	0	0	0	0	0	0	6	0	0	6	Bacteria{superkingdom}(91);Chloroflexi{phylum}(91);Chloroflexia{class}(91);Chloroflexales{order}(91);Unassigned{family}(0);Unassigned{genus}(0);Unassigned{species}(0)	Bacteria	Chloroflexi	Chloroflexia	Chloroflexales	Unassigned	Unassigned	Unassigned
ASV1336	0	0	0	0	0	0	487	0	350	0	0	0	0	0	0	0	0	837	Bacteria{superkingdom}(80);Planctomycetes{phylum}(80);Planctomycetia{class}(80);Planctomycetales{order}(80);Planctomycetaceae{family}(80);{genus}(80);Unassigned{species}(0)	Bacteria	Planctomycetes	Planctomycetia	Planctomycetales	Planctomycetaceae		Unassigned
ASV1338	11	0	0	38	240	32	0	0	0	0	0	0	0	0	0	0	50	371	Bacteria{superkingdom}(86);Proteobacteria{phylum}(86);Alphaproteobacteria{class}(86);Sphingomonadales{order}(86);Sphingomonadaceae{family}(86);Sphingomonas{genus}(86);Unassigned{species}(0)	Bacteria	Proteobacteria	Alphaproteobacteria	Sphingomonadales	Sphingomonadaceae	Sphingomonas	Unassigned
ASV1340	42	67	47	35	0	31	8	0	0	0	0	0	0	0	0	36	0	266	Bacteria{superkingdom}(100);candidate_division_WPS-1{phylum}(100);{class}(100);{order}(100);{family}(100);WPS-1_genera_incertae_sedis{genus}(100);Unassigned{species}(0)	Bacteria	candidate_division_WPS-1				WPS-1_genera_incertae_sedis	Unassigned
[truncated: 18,270 more rows]
