# Supplementary material for: Years of sand fixation with Caragana korshinskii drive the enrichment of its rhizosphere functional microbes by accumulating soil N
Source: PeerJ journal article supplement (doi:10.7717/peerj.14271), 2022-11-01
Supplement: ASV_copies_of_bacteria_in_summer.xlsx [file ASV_copies_of_bacteria_in_summer.xlsx]

## Sheet: otu_copies
#OTU ID	Ck18-1	Ck18-2	Ck18-3	Ck18-4	Ck18-5	Ck12-1	Ck12-2	Ck12-3	Ck12-4	Ck12-5	Ck6-1	Ck6-2	Ck6-3	Ck6-4	Ck6-5	OTUsize	Taxonomy	superkingdom	phylum	class	order	family	genus	species
ASV1	2744	1964	3545	4288	3629	1407	3106	3505	3683	8423	4542	2786	4882	3485	3147	55136	Bacteria{superkingdom}(97);Actinobacteria{phylum}(97);Actinobacteria{class}(97);Actinomycetales{order}(97);Micrococcaceae{family}(97);Arthrobacter{genus}(97);Unassigned{species}(0)	Bacteria	Actinobacteria	Actinobacteria	Actinomycetales	Micrococcaceae	Arthrobacter	Unassigned
ASV2	2179	1332	1298	3087	3443	1996	2278	4903	2304	7310	173	1110	908	2676	2760	37757	Bacteria{superkingdom}(97);Actinobacteria{phylum}(97);Actinobacteria{class}(97);Actinomycetales{order}(97);Micrococcaceae{family}(97);Arthrobacter{genus}(97);Unassigned{species}(0)	Bacteria	Actinobacteria	Actinobacteria	Actinomycetales	Micrococcaceae	Arthrobacter	Unassigned
ASV4	146	943	162	277	278	230	333	152	421	1114	1354	1728	1098	634	244	9114	Bacteria{superkingdom}(92);Actinobacteria{phylum}(92);Actinobacteria{class}(92);Solirubrobacterales{order}(92);{family}(92);{genus}(92);Unassigned{species}(0)	Bacteria	Actinobacteria	Actinobacteria	Solirubrobacterales			Unassigned
ASV5	1204	2776	1559	5186	2459	772	410	210	592	473	1602	2025	59	2422	3759	25508	Bacteria{superkingdom}(100);Actinobacteria{phylum}(100);Actinobacteria{class}(100);Actinomycetales{order}(100);Streptomycetaceae{family}(100);Streptomyces{genus}(100);Unassigned{species}(0)	Bacteria	Actinobacteria	Actinobacteria	Actinomycetales	Streptomycetaceae	Streptomyces	Unassigned
ASV7	46	692	26	195	257	40	51	203	132	295	73	773	1466	386	1829	6464	Bacteria{superkingdom}(100);Acidobacteria{phylum}(100);Acidobacteria_Gp4{class}(100);{order}(100);{family}(100);Gp4{genus}(100);Unassigned{species}(0)	Bacteria	Acidobacteria	Acidobacteria_Gp4			Gp4	Unassigned
ASV8	1042	938	1081	4411	2576	39	233	175	687	106	111	768	70	1505	72	13814	Bacteria{superkingdom}(100);Actinobacteria{phylum}(100);Actinobacteria{class}(100);Actinomycetales{order}(100);Nocardioidaceae{family}(100);Kribbella{genus}(100);Unassigned{species}(0)	Bacteria	Actinobacteria	Actinobacteria	Actinomycetales	Nocardioidaceae	Kribbella	Unassigned
ASV9	6	26	12	15	48	9	0	0	10	228	6	0	0	11	7	378	Bacteria{superkingdom}(84);Chloroflexi{phylum}(84);{class}(84);{order}(84);{family}(84);{genus}(84);uncultured_Sphaerobacter_sp.{species}(84)	Bacteria	Chloroflexi					uncultured_Sphaerobacter_sp.
ASV11	1884	2810	2263	1432	3555	661	1959	996	2354	1257	431	675	2403	190	808	23678	Bacteria{superkingdom}(88);Chloroflexi{phylum}(88);Anaerolineae{class}(88);Anaerolineales{order}(88);Anaerolineaceae{family}(88);{genus}(88);uncultured_soil_bacterium{species}(88)	Bacteria	Chloroflexi	Anaerolineae	Anaerolineales	Anaerolineaceae		uncultured_soil_bacterium
ASV12	0	37	0	117	0	0	61	55	55	251	10	632	222	747	155	2342	Bacteria{superkingdom}(100);Proteobacteria{phylum}(100);Alphaproteobacteria{class}(100);Rhizobiales{order}(100);Methylobacteriaceae{family}(100);Microvirga{genus}(100);Unassigned{species}(0)	Bacteria	Proteobacteria	Alphaproteobacteria	Rhizobiales	Methylobacteriaceae	Microvirga	Unassigned
ASV13	0	0	0	119	225	0	62	162	476	680	184	627	0	0	0	2535	Bacteria{superkingdom}(100);Actinobacteria{phylum}(100);Actinobacteria{class}(100);{order}(100);{family}(100);{genus}(100);uncultured_Actinomycetales_bacterium{species}(100)	Bacteria	Actinobacteria	Actinobacteria				uncultured_Actinomycetales_bacterium
ASV14	0	0	0	720	175	202	0	1091	574	878	141	557	1556	1042	0	6936	Bacteria{superkingdom}(97);Actinobacteria{phylum}(97);Actinobacteria{class}(97);Actinomycetales{order}(97);Micrococcaceae{family}(97);Arthrobacter{genus}(97);Unassigned{species}(0)	Bacteria	Actinobacteria	Actinobacteria	Actinomycetales	Micrococcaceae	Arthrobacter	Unassigned
ASV15	31	298	34	62	95	299	366	427	116	437	72	522	767	679	451	4656	Bacteria{superkingdom}(94);Proteobacteria{phylum}(94);Alphaproteobacteria{class}(94);Rhizobiales{order}(94);Methylobacteriaceae{family}(94);Microvirga{genus}(94);Unassigned{species}(0)	Bacteria	Proteobacteria	Alphaproteobacteria	Rhizobiales	Methylobacteriaceae	Microvirga	Unassigned
ASV16	0	0	0	68	106	0	0	0	0	0	0	0	0	0	0	174	Bacteria{superkingdom}(99);Actinobacteria{phylum}(99);Actinobacteria{class}(99);Actinomycetales{order}(99);Streptomycetaceae{family}(99);Streptomyces{genus}(99);Unassigned{species}(0)	Bacteria	Actinobacteria	Actinobacteria	Actinomycetales	Streptomycetaceae	Streptomyces	Unassigned
ASV17	1462	770	1896	7986	8949	29	304	108	67	247	0	0	0	0	0	21818	Bacteria{superkingdom}(99);Actinobacteria{phylum}(99);Actinobacteria{class}(99);Actinomycetales{order}(99);Streptomycetaceae{family}(99);Streptomyces{genus}(99);Unassigned{species}(0)	Bacteria	Actinobacteria	Actinobacteria	Actinomycetales	Streptomycetaceae	Streptomyces	Unassigned
ASV18	1107	104	965	2198	1530	253	547	883	354	1318	225	821	1879	867	559	13610	Bacteria{superkingdom}(100);Actinobacteria{phylum}(100);Actinobacteria{class}(100);Actinomycetales{order}(100);Microbacteriaceae{family}(100);Agromyces{genus}(100);Unassigned{species}(0)	Bacteria	Actinobacteria	Actinobacteria	Actinomycetales	Microbacteriaceae	Agromyces	Unassigned
ASV19	564	1615	241	881	585	144	208	643	330	894	298	2287	1247	1682	222	11841	Bacteria{superkingdom}(99);Actinobacteria{phylum}(99);Actinobacteria{class}(99);Actinomycetales{order}(99);Nocardioidaceae{family}(99);Aeromicrobium{genus}(99);Unassigned{species}(0)	Bacteria	Actinobacteria	Actinobacteria	Actinomycetales	Nocardioidaceae	Aeromicrobium	Unassigned
ASV20	661	3191	53	561	272	407	386	612	94	781	0	146	47	2006	192	9409	Bacteria{superkingdom}(99);Chloroflexi{phylum}(99);Anaerolineae{class}(99);Anaerolineales{order}(99);Anaerolineaceae{family}(99);{genus}(99);uncultured_soil_bacterium{species}(99)	Bacteria	Chloroflexi	Anaerolineae	Anaerolineales	Anaerolineaceae		uncultured_soil_bacterium
ASV21	293	233	130	607	1239	0	0	142	300	0	944	15	0	31	65	3999	Bacteria{superkingdom}(100);Acidobacteria{phylum}(100);Acidobacteria_Gp4{class}(100);{order}(100);{family}(100);Gp4{genus}(100);Unassigned{species}(0)	Bacteria	Acidobacteria	Acidobacteria_Gp4			Gp4	Unassigned
ASV22	266	550	174	1935	702	63	283	85	208	416	181	195	560	231	219	6068	Bacteria{superkingdom}(83);Actinobacteria{phylum}(83);Actinobacteria{class}(83);Actinomycetales{order}(83);Pseudonocardiaceae{family}(83);Lechevalieria{genus}(83);Unassigned{species}(0)	Bacteria	Actinobacteria	Actinobacteria	Actinomycetales	Pseudonocardiaceae	Lechevalieria	Unassigned
ASV23	356	579	366	444	409	256	211	217	604	309	213	385	277	168	166	4960	Bacteria{superkingdom}(100);Proteobacteria{phylum}(100);Betaproteobacteria{class}(100);Burkholderiales{order}(100);Burkholderiaceae{family}(100);Ralstonia{genus}(100);Unassigned{species}(0)	Bacteria	Proteobacteria	Betaproteobacteria	Burkholderiales	Burkholderiaceae	Ralstonia	Unassigned
ASV24	247	3563	1252	793	2305	266	221	0	353	58	2537	39	50	25	75	11784	Bacteria{superkingdom}(100);Proteobacteria{phylum}(100);Alphaproteobacteria{class}(100);Rhizobiales{order}(100);Phyllobacteriaceae{family}(100);Mesorhizobium{genus}(100);Unassigned{species}(0)	Bacteria	Proteobacteria	Alphaproteobacteria	Rhizobiales	Phyllobacteriaceae	Mesorhizobium	Unassigned
ASV25	11	43	0	78	56	0	0	20	20	419	0	83	60	0	19	809	Bacteria{superkingdom}(99);Proteobacteria{phylum}(99);Betaproteobacteria{class}(99);Burkholderiales{order}(99);Oxalobacteraceae{family}(99);Massilia{genus}(99);Unassigned{species}(0)	Bacteria	Proteobacteria	Betaproteobacteria	Burkholderiales	Oxalobacteraceae	Massilia	Unassigned
ASV26	42	1757	22	0	149	2544	615	482	38	1049	0	82	79	1437	205	8501	Bacteria{superkingdom}(100);Acidobacteria{phylum}(100);Acidobacteria_Gp4{class}(100);{order}(100);{family}(100);Gp4{genus}(100);uncultured_Candidatus_Chloracidobacterium_sp.{species}(100)	Bacteria	Acidobacteria	Acidobacteria_Gp4			Gp4	uncultured_Candidatus_Chloracidobacterium_sp.
ASV27	82	73	90	2026	978	387	708	1496	287	629	183	621	1440	859	78	9937	Bacteria{superkingdom}(100);Nitrospirae{phylum}(100);Nitrospira{class}(100);Nitrospirales{order}(100);Nitrospiraceae{family}(100);Nitrospira{genus}(100);Unassigned{species}(0)	Bacteria	Nitrospirae	Nitrospira	Nitrospirales	Nitrospiraceae	Nitrospira	Unassigned
ASV28	363	108	119	700	415	136	172	348	78	475	177	617	306	385	578	4977	Bacteria{superkingdom}(100);Proteobacteria{phylum}(100);Alphaproteobacteria{class}(100);Rhizobiales{order}(100);Methylobacteriaceae{family}(100);Microvirga{genus}(100);Unassigned{species}(0)	Bacteria	Proteobacteria	Alphaproteobacteria	Rhizobiales	Methylobacteriaceae	Microvirga	Unassigned
ASV29	3	5	3	6	0	0	0	0	4	7	3	0	4	5	0	40	Bacteria{superkingdom}(100);Cyanobacteria/Chloroplast{phylum}(100);Cyanobacteria{class}(100);{order}(100);Unassigned{family}(0);Unassigned{genus}(0);Unassigned{species}(0)	Bacteria	Cyanobacteria/Chloroplast	Cyanobacteria		Unassigned	Unassigned	Unassigned
ASV30	1106	0	648	3756	2210	10	105	103	208	0	195	183	359	300	17	9200	Bacteria{superkingdom}(100);Actinobacteria{phylum}(100);Actinobacteria{class}(100);Actinomycetales{order}(100);Pseudonocardiaceae{family}(100);Amycolatopsis{genus}(100);Unassigned{species}(0)	Bacteria	Actinobacteria	Actinobacteria	Actinomycetales	Pseudonocardiaceae	Amycolatopsis	Unassigned
ASV31	850	229	931	557	2074	171	167	16	77	50	69	0	0	49	225	5465	Bacteria{superkingdom}(99);Proteobacteria{phylum}(99);Alphaproteobacteria{class}(99);Rhizobiales{order}(99);Rhizobiaceae{family}(99);Rhizobium{genus}(99);Unassigned{species}(0)	Bacteria	Proteobacteria	Alphaproteobacteria	Rhizobiales	Rhizobiaceae	Rhizobium	Unassigned
ASV32	80	193	84	406	201	33	0	288	28	98	0	0	26	42	0	1479	Bacteria{superkingdom}(100);Actinobacteria{phylum}(100);Actinobacteria{class}(100);Rubrobacterales{order}(100);Rubrobacteraceae{family}(100);Rubrobacter{genus}(100);Unassigned{species}(0)	Bacteria	Actinobacteria	Actinobacteria	Rubrobacterales	Rubrobacteraceae	Rubrobacter	Unassigned
ASV33	64	838	49	166	137	0	113	367	170	116	0	172	57	41	476	2766	Bacteria{superkingdom}(83);Acidobacteria{phylum}(83);Acidobacteria_Gp4{class}(83);{order}(83);{family}(83);Gp4{genus}(83);Acidobacterium_sp._Ac_12_G8{species}(83)	Bacteria	Acidobacteria	Acidobacteria_Gp4			Gp4	Acidobacterium_sp._Ac_12_G8
ASV34	202	68	265	513	1371	231	426	223	308	1233	273	419	1341	504	253	7630	Bacteria{superkingdom}(100);Actinobacteria{phylum}(100);Actinobacteria{class}(100);Actinomycetales{order}(100);Streptomycetaceae{family}(100);Streptomyces{genus}(100);Unassigned{species}(0)	Bacteria	Actinobacteria	Actinobacteria	Actinomycetales	Streptomycetaceae	Streptomyces	Unassigned
ASV35	296	804	298	1121	1530	195	266	126	128	410	471	145	82	547	275	6694	Bacteria{superkingdom}(97);Actinobacteria{phylum}(97);Actinobacteria{class}(97);Actinomycetales{order}(97);Mycobacteriaceae{family}(97);Mycobacterium{genus}(97);Unassigned{species}(0)	Bacteria	Actinobacteria	Actinobacteria	Actinomycetales	Mycobacteriaceae	Mycobacterium	Unassigned
ASV36	0	817	40	0	175	74	85	66	254	373	149	770	924	353	297	4377	Bacteria{superkingdom}(94);Actinobacteria{phylum}(94);Actinobacteria{class}(94);Acidimicrobiales{order}(94);{family}(94);{genus}(94);uncultured_Thermobifida_sp.{species}(94)	Bacteria	Actinobacteria	Actinobacteria	Acidimicrobiales			uncultured_Thermobifida_sp.
ASV38	238	751	137	645	759	793	443	825	254	1465	87	419	0	274	613	7703	Bacteria{superkingdom}(97);Proteobacteria{phylum}(97);Alphaproteobacteria{class}(97);Rhizobiales{order}(97);Rhodobiaceae{family}(97);{genus}(97);Unassigned{species}(0)	Bacteria	Proteobacteria	Alphaproteobacteria	Rhizobiales	Rhodobiaceae		Unassigned
ASV39	564	207	847	1878	2727	45	340	143	122	254	147	222	391	207	295	8389	Bacteria{superkingdom}(100);Actinobacteria{phylum}(100);Actinobacteria{class}(100);Actinomycetales{order}(100);Microbacteriaceae{family}(100);Microbacterium{genus}(100);Unassigned{species}(0)	Bacteria	Actinobacteria	Actinobacteria	Actinomycetales	Microbacteriaceae	Microbacterium	Unassigned
ASV40	426	1116	299	436	1506	417	560	577	642	348	2034	166	477	216	447	9667	Bacteria{superkingdom}(97);Actinobacteria{phylum}(97);Actinobacteria{class}(97);Acidimicrobiales{order}(97);Acidimicrobineae_incertae_sedis{family}(97);Aciditerrimonas{genus}(97);uncultured_Acidimicrobiales_bacterium{species}(97)	Bacteria	Actinobacteria	Actinobacteria	Acidimicrobiales	Acidimicrobineae_incertae_sedis	Aciditerrimonas	uncultured_Acidimicrobiales_bacterium
ASV41	204	120	165	761	1580	1051	672	483	941	1498	819	964	1671	529	826	12284	Bacteria{superkingdom}(99);Proteobacteria{phylum}(99);Alphaproteobacteria{class}(99);Rhizobiales{order}(99);Hyphomicrobiaceae{family}(99);Hyphomicrobium{genus}(99);Unassigned{species}(0)	Bacteria	Proteobacteria	Alphaproteobacteria	Rhizobiales	Hyphomicrobiaceae	Hyphomicrobium	Unassigned
ASV42	36	450	95	50	137	85	1067	232	168	238	169	651	850	628	782	5638	Bacteria{superkingdom}(86);Bacteroidetes{phylum}(86);Sphingobacteriia{class}(86);Sphingobacteriales{order}(86);Chitinophagaceae{family}(86);{genus}(86);Unassigned{species}(0)	Bacteria	Bacteroidetes	Sphingobacteriia	Sphingobacteriales	Chitinophagaceae		Unassigned
ASV43	0	0	0	0	0	0	40	0	0	0	0	48	0	14	0	102	Bacteria{superkingdom}(99);Firmicutes{phylum}(99);Bacilli{class}(99);Bacillales{order}(99);Planococcaceae{family}(99);Unassigned{genus}(0);Unassigned{species}(0)	Bacteria	Firmicutes	Bacilli	Bacillales	Planococcaceae	Unassigned	Unassigned
ASV44	80	390	49	73	72	107	147	197	186	582	57	333	411	537	393	3614	Bacteria{superkingdom}(100);Actinobacteria{phylum}(100);Actinobacteria{class}(100);Actinomycetales{order}(100);Geodermatophilaceae{family}(100);Blastococcus{genus}(100);Unassigned{species}(0)	Bacteria	Actinobacteria	Actinobacteria	Actinomycetales	Geodermatophilaceae	Blastococcus	Unassigned
ASV45	59	23	0	106	45	26	35	77	96	319	0	557	302	558	30	2233	Bacteria{superkingdom}(88);Actinobacteria{phylum}(88);Actinobacteria{class}(88);Actinomycetales{order}(88);Pseudonocardiaceae{family}(88);Actinomycetospora{genus}(88);uncultured_bacterium{species}(88)	Bacteria	Actinobacteria	Actinobacteria	Actinomycetales	Pseudonocardiaceae	Actinomycetospora	uncultured_bacterium
ASV47	14	141	0	23	0	151	254	352	61	383	14	451	427	1124	109	3504	Bacteria{superkingdom}(100);{phylum}(100);{class}(100);{order}(100);{family}(100);{genus}(100);uncultured_candidate_division_WYO_bacterium{species}(100)	Bacteria						uncultured_candidate_division_WYO_bacterium
ASV48	99	743	81	223	106	52	97	335	138	396	0	52	68	24	30	2444	Bacteria{superkingdom}(99);Chloroflexi{phylum}(99);Thermomicrobia{class}(99);Sphaerobacterales{order}(99);Sphaerobacteraceae{family}(99);Unassigned{genus}(0);Unassigned{species}(0)	Bacteria	Chloroflexi	Thermomicrobia	Sphaerobacterales	Sphaerobacteraceae	Unassigned	Unassigned
ASV49	220	1239	399	408	712	496	887	705	388	1744	316	1004	2164	767	1177	12626	Bacteria{superkingdom}(100);Acidobacteria{phylum}(100);Acidobacteria_Gp16{class}(100);{order}(100);{family}(100);Gp16{genus}(100);Unassigned{species}(0)	Bacteria	Acidobacteria	Acidobacteria_Gp16			Gp16	Unassigned
ASV50	0	114	0	645	0	66	287	198	134	1505	69	738	809	869	462	5896	Bacteria{superkingdom}(97);Proteobacteria{phylum}(97);Alphaproteobacteria{class}(97);Rhizobiales{order}(97);Methylobacteriaceae{family}(97);Microvirga{genus}(97);Unassigned{species}(0)	Bacteria	Proteobacteria	Alphaproteobacteria	Rhizobiales	Methylobacteriaceae	Microvirga	Unassigned
ASV51	3211	435	2554	0	15677	453	0	353	75	0	0	0	0	0	0	22758	Bacteria{superkingdom}(100);Actinobacteria{phylum}(100);Actinobacteria{class}(100);Actinomycetales{order}(100);Streptomycetaceae{family}(100);Streptomyces{genus}(100);Unassigned{species}(0)	Bacteria	Actinobacteria	Actinobacteria	Actinomycetales	Streptomycetaceae	Streptomyces	Unassigned
ASV52	85	707	35	57	56	22	0	149	50	135	0	0	0	228	0	1524	Bacteria{superkingdom}(100);Proteobacteria{phylum}(100);Alphaproteobacteria{class}(100);Rhizobiales{order}(100);{family}(100);{genus}(100);uncultured_endolithic_bacterium{species}(100)	Bacteria	Proteobacteria	Alphaproteobacteria	Rhizobiales			uncultured_endolithic_bacterium
ASV53	134	187	224	112	655	1011	1009	1361	1117	437	0	0	0	0	0	6247	Bacteria{superkingdom}(100);Bacteroidetes{phylum}(100);Cytophagia{class}(100);Cytophagales{order}(100);Cytophagaceae{family}(100);Adhaeribacter{genus}(100);Unassigned{species}(0)	Bacteria	Bacteroidetes	Cytophagia	Cytophagales	Cytophagaceae	Adhaeribacter	Unassigned
ASV54	374	191	687	308	1275	1707	3548	275	661	4137	581	14	80	100	1924	15862	Bacteria{superkingdom}(100);{phylum}(100);{class}(100);{order}(100);{family}(100);{genus}(100);uncultured_Actinomyces_sp.{species}(100)	Bacteria						uncultured_Actinomyces_sp.
ASV55	0	0	0	0	14	0	0	0	5	0	0	0	0	0	0	19	Bacteria{superkingdom}(94);Cyanobacteria/Chloroplast{phylum}(94);Cyanobacteria{class}(94);{order}(94);Family_I{family}(94);GpI{genus}(94);uncultured_Scytonema_sp.{species}(94)	Bacteria	Cyanobacteria/Chloroplast	Cyanobacteria		Family_I	GpI	uncultured_Scytonema_sp.
ASV56	0	677	0	11	61	536	196	248	0	511	0	0	0	0	0	2240	Bacteria{superkingdom}(100);Acidobacteria{phylum}(100);Acidobacteria_Gp4{class}(100);{order}(100);{family}(100);Gp4{genus}(100);Unassigned{species}(0)	Bacteria	Acidobacteria	Acidobacteria_Gp4			Gp4	Unassigned
ASV57	115	0	108	2942	868	0	0	13	21	0	0	33	0	14	0	4114	Bacteria{superkingdom}(100);Proteobacteria{phylum}(100);Gammaproteobacteria{class}(100);Xanthomonadales{order}(100);Xanthomonadaceae{family}(100);Pseudoxanthomonas{genus}(100);Unassigned{species}(0)	Bacteria	Proteobacteria	Gammaproteobacteria	Xanthomonadales	Xanthomonadaceae	Pseudoxanthomonas	Unassigned
ASV58	433	245	526	2024	1291	112	181	87	104	631	135	162	263	119	128	6441	Bacteria{superkingdom}(100);Proteobacteria{phylum}(100);Alphaproteobacteria{class}(100);Rhizobiales{order}(100);Rhizobiaceae{family}(100);Ensifer{genus}(100);Unassigned{species}(0)	Bacteria	Proteobacteria	Alphaproteobacteria	Rhizobiales	Rhizobiaceae	Ensifer	Unassigned
ASV59	0	19	0	0	14	0	0	14	0	48	0	0	0	0	0	95	Bacteria{superkingdom}(100);Actinobacteria{phylum}(100);Actinobacteria{class}(100);Rubrobacterales{order}(100);Rubrobacteraceae{family}(100);Rubrobacter{genus}(100);Unassigned{species}(0)	Bacteria	Actinobacteria	Actinobacteria	Rubrobacterales	Rubrobacteraceae	Rubrobacter	Unassigned
ASV60	57	382	79	583	314	567	1000	581	315	967	143	190	98	461	301	6038	Bacteria{superkingdom}(100);Acidobacteria{phylum}(100);Acidobacteria_Gp6{class}(100);{order}(100);{family}(100);Gp6{genus}(100);Unassigned{species}(0)	Bacteria	Acidobacteria	Acidobacteria_Gp6			Gp6	Unassigned
ASV61	163	0	55	304	86	107	318	1019	119	261	0	52	10	26	0	2520	Bacteria{superkingdom}(100);Proteobacteria{phylum}(100);Gammaproteobacteria{class}(100);Unassigned{order}(0);Unassigned{family}(0);Unassigned{genus}(0);Unassigned{species}(0)	Bacteria	Proteobacteria	Gammaproteobacteria	Unassigned	Unassigned	Unassigned	Unassigned
ASV62	59	0	64	191	100	2850	10206	462	333	2227	315	34	0	0	491	17332	Bacteria{superkingdom}(100);Acidobacteria{phylum}(100);Acidobacteria_Gp4{class}(100);{order}(100);{family}(100);Gp4{genus}(100);Unassigned{species}(0)	Bacteria	Acidobacteria	Acidobacteria_Gp4			Gp4	Unassigned
ASV63	159	677	42	121	296	0	0	59	24	0	30	0	0	52	32	1492	Bacteria{superkingdom}(85);Acidobacteria{phylum}(85);Acidobacteria_Gp4{class}(85);{order}(85);{family}(85);Gp4{genus}(85);uncultured_Rhodopseudomonas_sp.{species}(85)	Bacteria	Acidobacteria	Acidobacteria_Gp4			Gp4	uncultured_Rhodopseudomonas_sp.
ASV64	0	0	0	0	0	0	0	0	0	230	82	144	265	210	190	1121	Bacteria{superkingdom}(89);Proteobacteria{phylum}(89);Alphaproteobacteria{class}(89);Rhizobiales{order}(89);Methylobacteriaceae{family}(89);Microvirga{genus}(89);Unassigned{species}(0)	Bacteria	Proteobacteria	Alphaproteobacteria	Rhizobiales	Methylobacteriaceae	Microvirga	Unassigned
ASV66	0	0	0	0	0	0	0	0	99	221	0	0	0	0	0	320	Bacteria{superkingdom}(100);Actinobacteria{phylum}(100);Actinobacteria{class}(100);Acidimicrobiales{order}(100);Unassigned{family}(0);Unassigned{genus}(0);Unassigned{species}(0)	Bacteria	Actinobacteria	Actinobacteria	Acidimicrobiales	Unassigned	Unassigned	Unassigned
ASV67	325	0	165	130	1757	0	0	0	294	18	373	0	0	0	23	3085	Bacteria{superkingdom}(98);Acidobacteria{phylum}(98);Acidobacteria_Gp7{class}(98);{order}(98);{family}(98);Gp7{genus}(98);uncultured_Anaeromyxobacter_sp.{species}(98)	Bacteria	Acidobacteria	Acidobacteria_Gp7			Gp7	uncultured_Anaeromyxobacter_sp.
ASV68	33	602	16	53	89	0	563	180	18	106	0	69	0	13	19	1761	Bacteria{superkingdom}(96);Proteobacteria{phylum}(96);Alphaproteobacteria{class}(96);Rhizobiales{order}(96);{family}(96);{genus}(96);uncultured_endolithic_bacterium{species}(96)	Bacteria	Proteobacteria	Alphaproteobacteria	Rhizobiales			uncultured_endolithic_bacterium
ASV69	336	707	109	515	257	196	275	211	101	414	170	814	463	825	258	5651	Bacteria{superkingdom}(100);Actinobacteria{phylum}(100);Actinobacteria{class}(100);Actinomycetales{order}(100);Nocardioidaceae{family}(100);Nocardioides{genus}(100);Unassigned{species}(0)	Bacteria	Actinobacteria	Actinobacteria	Actinomycetales	Nocardioidaceae	Nocardioides	Unassigned
ASV70	455	0	67	1374	64	1779	75	612	513	310	825	0	60	0	0	6134	Bacteria{superkingdom}(93);Firmicutes{phylum}(93);Bacilli{class}(93);Bacillales{order}(93);Bacillaceae_1{family}(93);Domibacillus{genus}(93);uncultured_bacterium{species}(93)	Bacteria	Firmicutes	Bacilli	Bacillales	Bacillaceae_1	Domibacillus	uncultured_bacterium
ASV71	104	197	120	147	0	79	221	302	249	491	99	102	483	150	153	2897	Bacteria{superkingdom}(99);Chloroflexi{phylum}(99);Anaerolineae{class}(99);Anaerolineales{order}(99);Anaerolineaceae{family}(99);{genus}(99);uncultured_soil_bacterium{species}(99)	Bacteria	Chloroflexi	Anaerolineae	Anaerolineales	Anaerolineaceae		uncultured_soil_bacterium
ASV72	172	741	461	475	421	372	610	737	408	419	434	75	601	211	267	6404	Bacteria{superkingdom}(99);Actinobacteria{phylum}(99);Actinobacteria{class}(99);Acidimicrobiales{order}(99);Acidimicrobineae_incertae_sedis{family}(99);Aciditerrimonas{genus}(99);uncultured_Acidimicrobiales_bacterium{species}(99)	Bacteria	Actinobacteria	Actinobacteria	Acidimicrobiales	Acidimicrobineae_incertae_sedis	Aciditerrimonas	uncultured_Acidimicrobiales_bacterium
ASV73	94	688	49	114	0	104	198	119	223	374	56	58	90	47	0	2214	Bacteria{superkingdom}(100);Actinobacteria{phylum}(100);Actinobacteria{class}(100);Acidimicrobiales{order}(100);Unassigned{family}(0);Unassigned{genus}(0);Unassigned{species}(0)	Bacteria	Actinobacteria	Actinobacteria	Acidimicrobiales	Unassigned	Unassigned	Unassigned
ASV74	880	0	126	4047	296	0	18	49	1336	462	0	0	0	0	0	7214	Bacteria{superkingdom}(99);Actinobacteria{phylum}(99);Actinobacteria{class}(99);Actinomycetales{order}(99);Streptomycetaceae{family}(99);Streptomyces{genus}(99);Unassigned{species}(0)	Bacteria	Actinobacteria	Actinobacteria	Actinomycetales	Streptomycetaceae	Streptomyces	Unassigned
ASV75	324	128	200	1694	2302	178	189	134	73	0	104	72	98	82	153	5731	Bacteria{superkingdom}(99);Proteobacteria{phylum}(99);Alphaproteobacteria{class}(99);Rhizobiales{order}(99);{family}(99);{genus}(99);Unassigned{species}(0)	Bacteria	Proteobacteria	Alphaproteobacteria	Rhizobiales			Unassigned
ASV76	9	124	85	23	56	28	0	26	23	157	0	96	145	74	0	846	Bacteria{superkingdom}(100);Proteobacteria{phylum}(100);Alphaproteobacteria{class}(100);Rhodobacterales{order}(100);Rhodobacteraceae{family}(100);Rubellimicrobium{genus}(100);Unassigned{species}(0)	Bacteria	Proteobacteria	Alphaproteobacteria	Rhodobacterales	Rhodobacteraceae	Rubellimicrobium	Unassigned
ASV77	818	817	414	235	1387	865	608	210	179	398	21	16	0	146	143	6257	Bacteria{superkingdom}(84);Nitrospirae{phylum}(84);Nitrospira{class}(84);Nitrospirales{order}(84);Nitrospiraceae{family}(84);Nitrospira{genus}(84);uncultured_soil_bacterium{species}(84)	Bacteria	Nitrospirae	Nitrospira	Nitrospirales	Nitrospiraceae	Nitrospira	uncultured_soil_bacterium
ASV78	83	0	70	773	1056	41	0	36	0	0	184	0	0	0	73	2316	Bacteria{superkingdom}(99);Proteobacteria{phylum}(99);Alphaproteobacteria{class}(99);Rhodospirillales{order}(99);Rhodospirillaceae{family}(99);Dongia{genus}(99);Unassigned{species}(0)	Bacteria	Proteobacteria	Alphaproteobacteria	Rhodospirillales	Rhodospirillaceae	Dongia	Unassigned
ASV79	1	32	3	145	27	157	177	156	522	430	193	640	1908	246	253	4890	Bacteria{superkingdom}(82);Actinobacteria{phylum}(82);Actinobacteria{class}(82);Acidimicrobiales{order}(82);Acidimicrobineae_incertae_sedis{family}(82);Aciditerrimonas{genus}(82);uncultured_Acidimicrobiales_bacterium{species}(82)	Bacteria	Actinobacteria	Actinobacteria	Acidimicrobiales	Acidimicrobineae_incertae_sedis	Aciditerrimonas	uncultured_Acidimicrobiales_bacterium
ASV80	455	0	364	956	794	370	103	161	1123	706	190	0	65	0	58	5345	Bacteria{superkingdom}(95);Firmicutes{phylum}(95);Bacilli{class}(95);Bacillales{order}(95);Bacillaceae_1{family}(95);Bacillus{genus}(95);Bacillus_funiculus{species}(95)	Bacteria	Firmicutes	Bacilli	Bacillales	Bacillaceae_1	Bacillus	Bacillus_funiculus
ASV81	0	140	0	0	0	0	0	0	0	263	0	0	53	0	0	456	Bacteria{superkingdom}(100);Actinobacteria{phylum}(100);Actinobacteria{class}(100);Solirubrobacterales{order}(100);Unassigned{family}(0);Unassigned{genus}(0);Unassigned{species}(0)	Bacteria	Actinobacteria	Actinobacteria	Solirubrobacterales	Unassigned	Unassigned	Unassigned
ASV82	0	0	0	78	0	0	46	150	28	565	0	151	143	348	114	1623	Bacteria{superkingdom}(100);Proteobacteria{phylum}(100);Alphaproteobacteria{class}(100);Rhizobiales{order}(100);Methylobacteriaceae{family}(100);Microvirga{genus}(100);Unassigned{species}(0)	Bacteria	Proteobacteria	Alphaproteobacteria	Rhizobiales	Methylobacteriaceae	Microvirga	Unassigned
ASV83	0	0	0	0	0	0	0	0	0	0	0	60	0	0	0	60	Bacteria{superkingdom}(97);Firmicutes{phylum}(97);Bacilli{class}(97);Bacillales{order}(97);Planococcaceae{family}(97);Unassigned{genus}(0);Unassigned{species}(0)	Bacteria	Firmicutes	Bacilli	Bacillales	Planococcaceae	Unassigned	Unassigned
ASV84	508	612	506	330	1258	675	389	205	515	813	190	41	709	487	243	7481	Bacteria{superkingdom}(99);Chloroflexi{phylum}(99);Anaerolineae{class}(99);Anaerolineales{order}(99);Anaerolineaceae{family}(99);{genus}(99);uncultured_soil_bacterium{species}(99)	Bacteria	Chloroflexi	Anaerolineae	Anaerolineales	Anaerolineaceae		uncultured_soil_bacterium
ASV85	0	52	0	0	29	0	13	0	0	48	0	58	0	29	54	283	Bacteria{superkingdom}(100);Actinobacteria{phylum}(100);Actinobacteria{class}(100);Actinomycetales{order}(100);Unassigned{family}(0);Unassigned{genus}(0);Unassigned{species}(0)	Bacteria	Actinobacteria	Actinobacteria	Actinomycetales	Unassigned	Unassigned	Unassigned
ASV86	93	300	166	237	186	167	379	145	178	584	247	169	260	106	200	3417	Bacteria{superkingdom}(89);Actinobacteria{phylum}(89);Actinobacteria{class}(89);Actinomycetales{order}(89);Nocardioidaceae{family}(89);Marmoricola{genus}(89);Unassigned{species}(0)	Bacteria	Actinobacteria	Actinobacteria	Actinomycetales	Nocardioidaceae	Marmoricola	Unassigned
ASV87	0	0	0	0	0	0	0	0	0	123	0	29	0	26	0	178	Bacteria{superkingdom}(100);Bacteroidetes{phylum}(100);Cytophagia{class}(100);Cytophagales{order}(100);Cytophagaceae{family}(100);Adhaeribacter{genus}(100);Unassigned{species}(0)	Bacteria	Bacteroidetes	Cytophagia	Cytophagales	Cytophagaceae	Adhaeribacter	Unassigned
ASV88	0	0	0	0	0	0	0	54	0	0	0	0	0	0	0	54	Bacteria{superkingdom}(89);Acidobacteria{phylum}(89);Acidobacteria_Gp10{class}(89);{order}(89);{family}(89);Gp10{genus}(89);uncultured_Pelobacter_sp.{species}(89)	Bacteria	Acidobacteria	Acidobacteria_Gp10			Gp10	uncultured_Pelobacter_sp.
ASV89	112	994	147	322	97	221	133	246	128	426	162	276	0	33	123	3420	Bacteria{superkingdom}(100);Actinobacteria{phylum}(100);Actinobacteria{class}(100);Solirubrobacterales{order}(100);Unassigned{family}(0);Unassigned{genus}(0);Unassigned{species}(0)	Bacteria	Actinobacteria	Actinobacteria	Solirubrobacterales	Unassigned	Unassigned	Unassigned
ASV90	429	85	177	283	442	1281	1041	182	1157	743	275	229	967	54	276	7621	Bacteria{superkingdom}(99);Chloroflexi{phylum}(99);Unassigned{class}(0);Unassigned{order}(0);Unassigned{family}(0);Unassigned{genus}(0);Unassigned{species}(0)	Bacteria	Chloroflexi	Unassigned	Unassigned	Unassigned	Unassigned	Unassigned
ASV91	3397	0	533	138	913	165	1229	1312	3419	35	850	50	17	14	29	12101	Bacteria{superkingdom}(96);Firmicutes{phylum}(96);Bacilli{class}(96);Bacillales{order}(96);Bacillaceae_1{family}(96);Bacillus{genus}(96);Unassigned{species}(0)	Bacteria	Firmicutes	Bacilli	Bacillales	Bacillaceae_1	Bacillus	Unassigned
ASV92	96	245	550	227	810	196	405	209	589	482	610	509	1219	579	445	7171	Bacteria{superkingdom}(98);Actinobacteria{phylum}(98);Actinobacteria{class}(98);Acidimicrobiales{order}(98);Acidimicrobineae_incertae_sedis{family}(98);Aciditerrimonas{genus}(98);uncultured_Acidimicrobiales_bacterium{species}(98)	Bacteria	Actinobacteria	Actinobacteria	Acidimicrobiales	Acidimicrobineae_incertae_sedis	Aciditerrimonas	uncultured_Acidimicrobiales_bacterium
ASV93	179	102	142	722	1390	188	175	110	153	275	138	136	152	160	147	4169	Bacteria{superkingdom}(100);Acidobacteria{phylum}(100);Acidobacteria_Gp6{class}(100);{order}(100);{family}(100);Gp6{genus}(100);Unassigned{species}(0)	Bacteria	Acidobacteria	Acidobacteria_Gp6			Gp6	Unassigned
ASV94	660	0	602	1380	2346	0	57	30	45	0	6	54	58	29	24	5291	Bacteria{superkingdom}(100);Proteobacteria{phylum}(100);Betaproteobacteria{class}(100);Methylophilales{order}(100);Methylophilaceae{family}(100);Unassigned{genus}(0);Unassigned{species}(0)	Bacteria	Proteobacteria	Betaproteobacteria	Methylophilales	Methylophilaceae	Unassigned	Unassigned
ASV95	0	0	0	0	0	0	0	0	0	382	0	344	182	54	0	962	Bacteria{superkingdom}(100);Actinobacteria{phylum}(100);Actinobacteria{class}(100);Actinomycetales{order}(100);Streptomycetaceae{family}(100);Streptomyces{genus}(100);Unassigned{species}(0)	Bacteria	Actinobacteria	Actinobacteria	Actinomycetales	Streptomycetaceae	Streptomyces	Unassigned
ASV97	555	149	354	432	3829	196	692	380	519	245	182	108	358	63	315	8377	Bacteria{superkingdom}(100);Proteobacteria{phylum}(100);Gammaproteobacteria{class}(100);Xanthomonadales{order}(100);Sinobacteraceae{family}(100);Steroidobacter{genus}(100);Unassigned{species}(0)	Bacteria	Proteobacteria	Gammaproteobacteria	Xanthomonadales	Sinobacteraceae	Steroidobacter	Unassigned
ASV98	23	1030	486	177	5656	0	0	64	19	13	0	11	0	108	0	7587	Bacteria{superkingdom}(86);Acidobacteria{phylum}(86);Acidobacteria_Gp10{class}(86);{order}(86);{family}(86);Gp10{genus}(86);uncultured_soil_bacterium{species}(86)	Bacteria	Acidobacteria	Acidobacteria_Gp10			Gp10	uncultured_soil_bacterium
ASV99	36	12	66	50	72	0	0	0	26	0	0	65	158	100	278	863	Bacteria{superkingdom}(87);Actinobacteria{phylum}(87);Actinobacteria{class}(87);Solirubrobacterales{order}(87);Solirubrobacteraceae{family}(87);Solirubrobacter{genus}(87);uncultured_bacterium{species}(87)	Bacteria	Actinobacteria	Actinobacteria	Solirubrobacterales	Solirubrobacteraceae	Solirubrobacter	uncultured_bacterium
ASV100	0	0	0	0	0	0	0	0	0	0	0	37	0	0	0	37	Bacteria{superkingdom}(97);Proteobacteria{phylum}(97);Alphaproteobacteria{class}(97);Rhodobacterales{order}(97);Rhodobacteraceae{family}(97);Rubellimicrobium{genus}(97);uncultured_bacterium{species}(97)	Bacteria	Proteobacteria	Alphaproteobacteria	Rhodobacterales	Rhodobacteraceae	Rubellimicrobium	uncultured_bacterium
ASV101	220	396	517	535	2169	203	186	94	27	51	252	108	36	173	223	5190	Bacteria{superkingdom}(100);Proteobacteria{phylum}(100);Alphaproteobacteria{class}(100);Sphingomonadales{order}(100);Sphingomonadaceae{family}(100);Sphingomonas{genus}(100);Unassigned{species}(0)	Bacteria	Proteobacteria	Alphaproteobacteria	Sphingomonadales	Sphingomonadaceae	Sphingomonas	Unassigned
ASV102	188	257	95	341	582	66	194	272	222	231	0	0	24	0	53	2525	Bacteria{superkingdom}(100);Proteobacteria{phylum}(100);Deltaproteobacteria{class}(100);{order}(100);{family}(100);{genus}(100);Unassigned{species}(0)	Bacteria	Proteobacteria	Deltaproteobacteria				Unassigned
ASV103	0	0	35	0	2264	0	0	0	17	0	0	0	0	0	27	2343	Bacteria{superkingdom}(100);Bacteroidetes{phylum}(100);Sphingobacteriia{class}(100);Sphingobacteriales{order}(100);Chitinophagaceae{family}(100);Chitinophaga{genus}(100);Unassigned{species}(0)	Bacteria	Bacteroidetes	Sphingobacteriia	Sphingobacteriales	Chitinophagaceae	Chitinophaga	Unassigned
ASV104	361	0	512	767	849	0	108	25	47	56	53	227	51	301	0	3357	Bacteria{superkingdom}(100);Actinobacteria{phylum}(100);Actinobacteria{class}(100);Actinomycetales{order}(100);Nocardioidaceae{family}(100);Nocardioides{genus}(100);Unassigned{species}(0)	Bacteria	Actinobacteria	Actinobacteria	Actinomycetales	Nocardioidaceae	Nocardioides	Unassigned
ASV105	182	141	1012	1154	507	0	112	0	21	231	0	0	0	12	0	3372	Bacteria{superkingdom}(91);Actinobacteria{phylum}(91);Actinobacteria{class}(91);Actinomycetales{order}(91);Pseudonocardiaceae{family}(91);Actinophytocola{genus}(91);uncultured_bacterium{species}(91)	Bacteria	Actinobacteria	Actinobacteria	Actinomycetales	Pseudonocardiaceae	Actinophytocola	uncultured_bacterium
ASV106	0	0	8	0	0	0	0	0	0	0	0	0	0	0	0	8	Bacteria{superkingdom}(100);Proteobacteria{phylum}(100);Betaproteobacteria{class}(100);Burkholderiales{order}(100);Oxalobacteraceae{family}(100);Massilia{genus}(100);Unassigned{species}(0)	Bacteria	Proteobacteria	Betaproteobacteria	Burkholderiales	Oxalobacteraceae	Massilia	Unassigned
ASV107	0	0	0	0	0	23	0	0	0	145	0	301	68	116	0	653	Bacteria{superkingdom}(100);Chloroflexi{phylum}(100);Thermomicrobia{class}(100);Unassigned{order}(0);Unassigned{family}(0);Unassigned{genus}(0);Unassigned{species}(0)	Bacteria	Chloroflexi	Thermomicrobia	Unassigned	Unassigned	Unassigned	Unassigned
ASV108	0	77	0	27	61	21	0	21	70	120	6	128	57	194	36	818	Bacteria{superkingdom}(99);Proteobacteria{phylum}(99);Alphaproteobacteria{class}(99);Rhizobiales{order}(99);Methylobacteriaceae{family}(99);Microvirga{genus}(99);Unassigned{species}(0)	Bacteria	Proteobacteria	Alphaproteobacteria	Rhizobiales	Methylobacteriaceae	Microvirga	Unassigned
ASV109	207	0	277	30	228	30	33	74	41	137	41	94	36	1460	0	2688	Bacteria{superkingdom}(80);Proteobacteria{phylum}(80);Deltaproteobacteria{class}(80);Myxococcales{order}(80);Cystobacteraceae{family}(80);Unassigned{genus}(0);Unassigned{species}(0)	Bacteria	Proteobacteria	Deltaproteobacteria	Myxococcales	Cystobacteraceae	Unassigned	Unassigned
ASV110	0	0	0	0	0	0	0	0	0	0	0	36	0	0	0	36	Bacteria{superkingdom}(91);Actinobacteria{phylum}(91);Actinobacteria{class}(91);Actinomycetales{order}(91);Micrococcaceae{family}(91);Arthrobacter{genus}(91);Unassigned{species}(0)	Bacteria	Actinobacteria	Actinobacteria	Actinomycetales	Micrococcaceae	Arthrobacter	Unassigned
ASV111	85	0	79	132	222	679	958	392	381	976	109	240	963	395	612	6223	Bacteria{superkingdom}(100);Acidobacteria{phylum}(100);Acidobacteria_Gp6{class}(100);{order}(100);{family}(100);Gp6{genus}(100);Unassigned{species}(0)	Bacteria	Acidobacteria	Acidobacteria_Gp6			Gp6	Unassigned
ASV112	0	68	0	66	0	0	0	13	0	50	198	23	0	0	0	418	Bacteria{superkingdom}(100);Acidobacteria{phylum}(100);Acidobacteria_Gp10{class}(100);{order}(100);{family}(100);Gp10{genus}(100);Unassigned{species}(0)	Bacteria	Acidobacteria	Acidobacteria_Gp10			Gp10	Unassigned
ASV113	0	0	0	0	0	3	0	0	7	0	0	0	0	0	0	10	Bacteria{superkingdom}(94);Cyanobacteria/Chloroplast{phylum}(94);Cyanobacteria{class}(94);{order}(94);{family}(94);{genus}(94);Unassigned{species}(0)	Bacteria	Cyanobacteria/Chloroplast	Cyanobacteria				Unassigned
ASV114	343	398	296	555	1740	40	148	96	83	357	56	253	349	179	76	4969	Bacteria{superkingdom}(100);Proteobacteria{phylum}(100);Alphaproteobacteria{class}(100);Rhizobiales{order}(100);Rhizobiaceae{family}(100);Unassigned{genus}(0);Unassigned{species}(0)	Bacteria	Proteobacteria	Alphaproteobacteria	Rhizobiales	Rhizobiaceae	Unassigned	Unassigned
ASV115	294	134	51	879	926	333	122	105	126	179	256	468	189	208	407	4677	Bacteria{superkingdom}(100);Proteobacteria{phylum}(100);Alphaproteobacteria{class}(100);Rhizobiales{order}(100);Unassigned{family}(0);Unassigned{genus}(0);Unassigned{species}(0)	Bacteria	Proteobacteria	Alphaproteobacteria	Rhizobiales	Unassigned	Unassigned	Unassigned
ASV116	0	0	0	0	0	0	0	0	0	0	0	24	0	0	0	24	Bacteria{superkingdom}(100);Firmicutes{phylum}(100);Bacilli{class}(100);Bacillales{order}(100);Bacillaceae_1{family}(100);Domibacillus{genus}(100);Unassigned{species}(0)	Bacteria	Firmicutes	Bacilli	Bacillales	Bacillaceae_1	Domibacillus	Unassigned
ASV117	424	66	283	585	633	22	199	39	84	137	56	284	443	151	107	3513	Bacteria{superkingdom}(100);Actinobacteria{phylum}(100);Actinobacteria{class}(100);Actinomycetales{order}(100);Nocardioidaceae{family}(100);Nocardioides{genus}(100);Unassigned{species}(0)	Bacteria	Actinobacteria	Actinobacteria	Actinomycetales	Nocardioidaceae	Nocardioides	Unassigned
ASV118	151	316	165	557	1693	0	1291	403	106	133	987	28	0	0	41	5871	Bacteria{superkingdom}(100);Acidobacteria{phylum}(100);Acidobacteria_Gp7{class}(100);{order}(100);{family}(100);Gp7{genus}(100);Unassigned{species}(0)	Bacteria	Acidobacteria	Acidobacteria_Gp7			Gp7	Unassigned
ASV119	233	454	235	256	430	83	105	107	175	186	57	45	97	100	42	2605	Bacteria{superkingdom}(100);Gemmatimonadetes{phylum}(100);Gemmatimonadetes{class}(100);Gemmatimonadales{order}(100);Gemmatimonadaceae{family}(100);Gemmatimonas{genus}(100);Unassigned{species}(0)	Bacteria	Gemmatimonadetes	Gemmatimonadetes	Gemmatimonadales	Gemmatimonadaceae	Gemmatimonas	Unassigned
ASV120	40	0	0	0	0	0	0	0	0	0	0	0	0	0	511	551	Bacteria{superkingdom}(98);Acidobacteria{phylum}(98);Acidobacteria_Gp4{class}(98);{order}(98);{family}(98);Gp4{genus}(98);uncultured_actinobacterium{species}(98)	Bacteria	Acidobacteria	Acidobacteria_Gp4			Gp4	uncultured_actinobacterium
ASV121	121	251	123	293	314	532	261	55	227	138	49	100	35	78	237	2814	Bacteria{superkingdom}(100);Planctomycetes{phylum}(100);Planctomycetia{class}(100);Planctomycetales{order}(100);Planctomycetaceae{family}(100);Pirellula{genus}(100);Unassigned{species}(0)	Bacteria	Planctomycetes	Planctomycetia	Planctomycetales	Planctomycetaceae	Pirellula	Unassigned
ASV122	0	39	0	0	0	0	0	0	0	53	0	0	0	0	0	92	Bacteria{superkingdom}(100);Acidobacteria{phylum}(100);Acidobacteria_Gp4{class}(100);{order}(100);{family}(100);Gp4{genus}(100);Unassigned{species}(0)	Bacteria	Acidobacteria	Acidobacteria_Gp4			Gp4	Unassigned
ASV123	0	0	0	686	0	0	0	44	0	0	0	0	0	0	0	730	Bacteria{superkingdom}(100);Actinobacteria{phylum}(100);Actinobacteria{class}(100);Actinomycetales{order}(100);Streptomycetaceae{family}(100);Streptomyces{genus}(100);Unassigned{species}(0)	Bacteria	Actinobacteria	Actinobacteria	Actinomycetales	Streptomycetaceae	Streptomyces	Unassigned
ASV124	44	0	124	503	507	440	288	556	606	524	450	38	190	139	535	4944	Bacteria{superkingdom}(100);Bacteroidetes{phylum}(100);Cytophagia{class}(100);Cytophagales{order}(100);Cytophagaceae{family}(100);Adhaeribacter{genus}(100);Unassigned{species}(0)	Bacteria	Bacteroidetes	Cytophagia	Cytophagales	Cytophagaceae	Adhaeribacter	Unassigned
ASV125	0	0	0	0	53	0	0	0	0	48	0	19	0	0	0	120	Bacteria{superkingdom}(99);Acidobacteria{phylum}(99);Acidobacteria_Gp4{class}(99);{order}(99);{family}(99);Gp4{genus}(99);Unassigned{species}(0)	Bacteria	Acidobacteria	Acidobacteria_Gp4			Gp4	Unassigned
ASV126	45	169	0	55	0	106	0	60	0	230	75	694	154	323	104	2015	Bacteria{superkingdom}(99);Actinobacteria{phylum}(99);Actinobacteria{class}(99);{order}(99);{family}(99);{genus}(99);uncultured_Actinomycetales_bacterium{species}(99)	Bacteria	Actinobacteria	Actinobacteria				uncultured_Actinomycetales_bacterium
ASV127	178	52	192	183	674	190	147	957	491	200	2033	521	76	56	258	6208	Bacteria{superkingdom}(98);Nitrospirae{phylum}(98);Nitrospira{class}(98);Nitrospirales{order}(98);Nitrospiraceae{family}(98);Nitrospira{genus}(98);uncultured_organism{species}(98)	Bacteria	Nitrospirae	Nitrospira	Nitrospirales	Nitrospiraceae	Nitrospira	uncultured_organism
ASV129	0	349	16	42	248	97	162	0	175	68	57	54	26	131	173	1598	Bacteria{superkingdom}(100);Actinobacteria{phylum}(100);Actinobacteria{class}(100);Actinomycetales{order}(100);Pseudonocardiaceae{family}(100);Lentzea{genus}(100);Unassigned{species}(0)	Bacteria	Actinobacteria	Actinobacteria	Actinomycetales	Pseudonocardiaceae	Lentzea	Unassigned
ASV130	155	581	161	242	308	129	0	112	0	254	73	84	311	474	161	3045	Bacteria{superkingdom}(100);Actinobacteria{phylum}(100);Actinobacteria{class}(100);Solirubrobacterales{order}(100);Solirubrobacteraceae{family}(100);Solirubrobacter{genus}(100);Unassigned{species}(0)	Bacteria	Actinobacteria	Actinobacteria	Solirubrobacterales	Solirubrobacteraceae	Solirubrobacter	Unassigned
ASV131	41	62	17	99	12	7	196	182	105	169	7	183	591	115	63	1849	Bacteria{superkingdom}(88);Chloroflexi{phylum}(88);Chloroflexia{class}(88);Kallotenuales{order}(88);Kallotenuaceae{family}(88);Kallotenue{genus}(88);uncultured_soil_bacterium{species}(88)	Bacteria	Chloroflexi	Chloroflexia	Kallotenuales	Kallotenuaceae	Kallotenue	uncultured_soil_bacterium
ASV132	325	316	218	2211	1935	54	51	169	261	0	338	117	107	28	37	6167	Bacteria{superkingdom}(100);Proteobacteria{phylum}(100);Gammaproteobacteria{class}(100);Xanthomonadales{order}(100);Sinobacteraceae{family}(100);Steroidobacter{genus}(100);Unassigned{species}(0)	Bacteria	Proteobacteria	Gammaproteobacteria	Xanthomonadales	Sinobacteraceae	Steroidobacter	Unassigned
ASV133	0	143	0	0	78	0	0	0	15	0	0	15	0	0	0	251	Bacteria{superkingdom}(100);Acidobacteria{phylum}(100);Acidobacteria_Gp4{class}(100);{order}(100);{family}(100);Gp4{genus}(100);uncultured_actinobacterium{species}(100)	Bacteria	Acidobacteria	Acidobacteria_Gp4			Gp4	uncultured_actinobacterium
ASV134	0	229	0	0	14	0	0	67	0	45	0	38	28	14	58	493	Bacteria{superkingdom}(86);Proteobacteria{phylum}(86);Betaproteobacteria{class}(86);{order}(86);{family}(86);{genus}(86);Unassigned{species}(0)	Bacteria	Proteobacteria	Betaproteobacteria				Unassigned
ASV135	137	337	147	86	225	73	278	52	56	231	0	84	40	75	24	1845	Bacteria{superkingdom}(100);Acidobacteria{phylum}(100);Acidobacteria_Gp16{class}(100);{order}(100);{family}(100);Gp16{genus}(100);Unassigned{species}(0)	Bacteria	Acidobacteria	Acidobacteria_Gp16			Gp16	Unassigned
ASV136	86	75	0	424	548	55	0	92	0	0	0	47	0	68	44	1439	Bacteria{superkingdom}(91);Proteobacteria{phylum}(91);Gammaproteobacteria{class}(91);Xanthomonadales{order}(91);Sinobacteraceae{family}(91);Steroidobacter{genus}(91);Unassigned{species}(0)	Bacteria	Proteobacteria	Gammaproteobacteria	Xanthomonadales	Sinobacteraceae	Steroidobacter	Unassigned
ASV137	120	382	77	471	664	118	120	40	78	302	162	128	137	202	138	3139	Bacteria{superkingdom}(94);Proteobacteria{phylum}(94);Alphaproteobacteria{class}(94);Rhizobiales{order}(94);Bradyrhizobiaceae{family}(94);Bradyrhizobium{genus}(94);Unassigned{species}(0)	Bacteria	Proteobacteria	Alphaproteobacteria	Rhizobiales	Bradyrhizobiaceae	Bradyrhizobium	Unassigned
ASV138	0	25	0	0	0	0	0	0	0	0	0	0	0	0	0	25	Bacteria{superkingdom}(100);Acidobacteria{phylum}(100);Acidobacteria_Gp4{class}(100);{order}(100);{family}(100);Gp4{genus}(100);Unassigned{species}(0)	Bacteria	Acidobacteria	Acidobacteria_Gp4			Gp4	Unassigned
ASV139	0	0	235	791	0	0	186	72	149	0	0	0	0	0	0	1433	Bacteria{superkingdom}(100);Actinobacteria{phylum}(100);Actinobacteria{class}(100);Actinomycetales{order}(100);Streptomycetaceae{family}(100);Streptomyces{genus}(100);Unassigned{species}(0)	Bacteria	Actinobacteria	Actinobacteria	Actinomycetales	Streptomycetaceae	Streptomyces	Unassigned
ASV140	0	917	46	217	317	0	21	146	7	0	0	0	0	1206	284	3161	Bacteria{superkingdom}(100);Acidobacteria{phylum}(100);Acidobacteria_Gp7{class}(100);{order}(100);{family}(100);Gp7{genus}(100);Unassigned{species}(0)	Bacteria	Acidobacteria	Acidobacteria_Gp7			Gp7	Unassigned
ASV141	162	1975	864	426	263	84	0	230	19	171	0	0	26	222	0	4442	Bacteria{superkingdom}(96);Actinobacteria{phylum}(96);Actinobacteria{class}(96);Solirubrobacterales{order}(96);Conexibacteraceae{family}(96);Conexibacter{genus}(96);Unassigned{species}(0)	Bacteria	Actinobacteria	Actinobacteria	Solirubrobacterales	Conexibacteraceae	Conexibacter	Unassigned
ASV142	276	359	217	497	545	17	19	37	64	133	116	833	127	1276	259	4775	Bacteria{superkingdom}(100);Actinobacteria{phylum}(100);Actinobacteria{class}(100);Actinomycetales{order}(100);Nocardioidaceae{family}(100);Nocardioides{genus}(100);Unassigned{species}(0)	Bacteria	Actinobacteria	Actinobacteria	Actinomycetales	Nocardioidaceae	Nocardioides	Unassigned
ASV143	190	98	184	208	175	401	433	260	566	240	211	131	390	95	133	3715	Bacteria{superkingdom}(99);Chloroflexi{phylum}(99);Chloroflexia{class}(99);{order}(99);{family}(99);{genus}(99);uncultured_bacterium{species}(99)	Bacteria	Chloroflexi	Chloroflexia				uncultured_bacterium
ASV146	159	30	148	198	166	98	237	496	162	482	97	36	94	81	575	3059	Bacteria{superkingdom}(93);Chloroflexi{phylum}(93);Anaerolineae{class}(93);Anaerolineales{order}(93);Anaerolineaceae{family}(93);{genus}(93);uncultured_Caldilineales_bacterium{species}(93)	Bacteria	Chloroflexi	Anaerolineae	Anaerolineales	Anaerolineaceae		uncultured_Caldilineales_bacterium
ASV147	0	0	0	0	0	0	0	0	0	0	0	5	0	0	0	5	Bacteria{superkingdom}(100);Bacteroidetes{phylum}(100);Cytophagia{class}(100);Cytophagales{order}(100);Cytophagaceae{family}(100);Rufibacter{genus}(100);uncultured_bacterium{species}(100)	Bacteria	Bacteroidetes	Cytophagia	Cytophagales	Cytophagaceae	Rufibacter	uncultured_bacterium
ASV148	298	271	23	78	2603	46	295	0	118	0	45	31	0	63	113	3984	Bacteria{superkingdom}(98);Bacteroidetes{phylum}(98);Sphingobacteriia{class}(98);Sphingobacteriales{order}(98);Chitinophagaceae{family}(98);Chitinophaga{genus}(98);Chitinophaga_japonensis{species}(98)	Bacteria	Bacteroidetes	Sphingobacteriia	Sphingobacteriales	Chitinophagaceae	Chitinophaga	Chitinophaga_japonensis
ASV149	417	68	303	86	623	409	103	185	962	286	297	0	0	0	141	3880	Bacteria{superkingdom}(97);Firmicutes{phylum}(97);Bacilli{class}(97);Bacillales{order}(97);Bacillaceae_1{family}(97);Bacillus{genus}(97);Unassigned{species}(0)	Bacteria	Firmicutes	Bacilli	Bacillales	Bacillaceae_1	Bacillus	Unassigned
ASV150	146	0	147	206	1163	0	59	16	29	131	0	132	50	20	0	2099	Bacteria{superkingdom}(100);Chloroflexi{phylum}(100);Thermomicrobia{class}(100);Sphaerobacterales{order}(100);Sphaerobacteraceae{family}(100);Sphaerobacter{genus}(100);uncultured_bacterium{species}(100)	Bacteria	Chloroflexi	Thermomicrobia	Sphaerobacterales	Sphaerobacteraceae	Sphaerobacter	uncultured_bacterium
ASV151	600	730	271	306	582	220	199	196	174	399	107	0	42	338	501	4665	Bacteria{superkingdom}(100);Actinobacteria{phylum}(100);Actinobacteria{class}(100);Actinomycetales{order}(100);Nocardioidaceae{family}(100);Nocardioides{genus}(100);Unassigned{species}(0)	Bacteria	Actinobacteria	Actinobacteria	Actinomycetales	Nocardioidaceae	Nocardioides	Unassigned
ASV152	212	122	190	779	1636	39	75	25	77	172	97	21	0	39	77	3561	Bacteria{superkingdom}(89);Proteobacteria{phylum}(89);Betaproteobacteria{class}(89);Burkholderiales{order}(89);Comamonadaceae{family}(89);Variovorax{genus}(89);Unassigned{species}(0)	Bacteria	Proteobacteria	Betaproteobacteria	Burkholderiales	Comamonadaceae	Variovorax	Unassigned
ASV153	22	26	0	241	0	0	18	159	24	0	35	0	0	0	32	557	Bacteria{superkingdom}(100);Acidobacteria{phylum}(100);Acidobacteria_Gp10{class}(100);{order}(100);{family}(100);Gp10{genus}(100);Unassigned{species}(0)	Bacteria	Acidobacteria	Acidobacteria_Gp10			Gp10	Unassigned
ASV154	116	0	77	1220	375	0	0	0	21	0	196	0	0	0	0	2005	Bacteria{superkingdom}(100);Bacteroidetes{phylum}(100);Sphingobacteriia{class}(100);Sphingobacteriales{order}(100);Chitinophagaceae{family}(100);Chitinophaga{genus}(100);Unassigned{species}(0)	Bacteria	Bacteroidetes	Sphingobacteriia	Sphingobacteriales	Chitinophagaceae	Chitinophaga	Unassigned
ASV155	0	0	0	0	14	0	0	63	0	89	0	33	0	110	0	309	Bacteria{superkingdom}(100);Proteobacteria{phylum}(100);Alphaproteobacteria{class}(100);Rhizobiales{order}(100);Methylobacteriaceae{family}(100);Microvirga{genus}(100);Unassigned{species}(0)	Bacteria	Proteobacteria	Alphaproteobacteria	Rhizobiales	Methylobacteriaceae	Microvirga	Unassigned
ASV156	0	12	14	10	0	0	0	0	0	6	3	0	0	0	0	45	Bacteria{superkingdom}(90);Cyanobacteria/Chloroplast{phylum}(90);Cyanobacteria{class}(90);{order}(90);Family_XIII{family}(90);GpXIII{genus}(90);uncultured_soil_bacterium{species}(90)	Bacteria	Cyanobacteria/Chloroplast	Cyanobacteria		Family_XIII	GpXIII	uncultured_soil_bacterium
ASV157	394	89	78	187	166	225	597	133	50	439	0	0	0	5	30	2393	Bacteria{superkingdom}(100);Chloroflexi{phylum}(100);Chloroflexia{class}(100);{order}(100);{family}(100);{genus}(100);uncultured_bacterium{species}(100)	Bacteria	Chloroflexi	Chloroflexia				uncultured_bacterium
ASV158	174	516	161	657	266	156	237	68	106	328	214	111	0	272	222	3488	Bacteria{superkingdom}(100);Chloroflexi{phylum}(100);Thermomicrobia{class}(100);Unassigned{order}(0);Unassigned{family}(0);Unassigned{genus}(0);Unassigned{species}(0)	Bacteria	Chloroflexi	Thermomicrobia	Unassigned	Unassigned	Unassigned	Unassigned
ASV159	85	241	114	121	134	151	232	110	222	228	124	208	119	99	111	2299	Bacteria{superkingdom}(100);Unassigned{phylum}(0);Unassigned{class}(0);Unassigned{order}(0);Unassigned{family}(0);Unassigned{genus}(0);Unassigned{species}(0)	Bacteria	Unassigned	Unassigned	Unassigned	Unassigned	Unassigned	Unassigned
ASV160	34	227	29	185	228	215	194	314	206	376	440	288	881	139	357	4113	Bacteria{superkingdom}(94);Proteobacteria{phylum}(94);Betaproteobacteria{class}(94);{order}(94);{family}(94);{genus}(94);Unassigned{species}(0)	Bacteria	Proteobacteria	Betaproteobacteria				Unassigned
ASV161	0	225	0	0	0	0	0	54	0	86	0	0	0	0	0	365	Bacteria{superkingdom}(100);Acidobacteria{phylum}(100);Acidobacteria_Gp4{class}(100);{order}(100);{family}(100);Gp4{genus}(100);Unassigned{species}(0)	Bacteria	Acidobacteria	Acidobacteria_Gp4			Gp4	Unassigned
ASV162	1358	0	584	285	1144	282	191	602	47	0	33	0	0	15	0	4541	Bacteria{superkingdom}(100);Firmicutes{phylum}(100);Bacilli{class}(100);Bacillales{order}(100);Bacillaceae_1{family}(100);Bacillus{genus}(100);Unassigned{species}(0)	Bacteria	Firmicutes	Bacilli	Bacillales	Bacillaceae_1	Bacillus	Unassigned
ASV163	81	30	138	513	523	97	137	70	135	26	16	41	54	39	148	2048	Bacteria{superkingdom}(100);Proteobacteria{phylum}(100);Gammaproteobacteria{class}(100);Xanthomonadales{order}(100);Sinobacteraceae{family}(100);Steroidobacter{genus}(100);Unassigned{species}(0)	Bacteria	Proteobacteria	Gammaproteobacteria	Xanthomonadales	Sinobacteraceae	Steroidobacter	Unassigned
ASV164	309	314	972	2307	2111	21	117	0	28	0	25	0	0	171	158	6533	Bacteria{superkingdom}(100);Actinobacteria{phylum}(100);Actinobacteria{class}(100);Actinomycetales{order}(100);Pseudonocardiaceae{family}(100);Pseudonocardia{genus}(100);Unassigned{species}(0)	Bacteria	Actinobacteria	Actinobacteria	Actinomycetales	Pseudonocardiaceae	Pseudonocardia	Unassigned
ASV165	146	0	99	400	305	45	69	132	66	209	141	136	185	150	154	2237	Bacteria{superkingdom}(100);Proteobacteria{phylum}(100);Alphaproteobacteria{class}(100);Rhizobiales{order}(100);Methylobacteriaceae{family}(100);Microvirga{genus}(100);Unassigned{species}(0)	Bacteria	Proteobacteria	Alphaproteobacteria	Rhizobiales	Methylobacteriaceae	Microvirga	Unassigned
ASV166	82	225	148	75	357	87	165	188	272	197	167	327	174	90	124	2678	Bacteria{superkingdom}(100);Proteobacteria{phylum}(100);Betaproteobacteria{class}(100);{order}(100);{family}(100);{genus}(100);Unassigned{species}(0)	Bacteria	Proteobacteria	Betaproteobacteria				Unassigned
ASV167	15	0	67	0	0	0	842	0	1781	1306	664	44	0	0	353	5072	Bacteria{superkingdom}(100);Acidobacteria{phylum}(100);Acidobacteria_Gp10{class}(100);{order}(100);{family}(100);Gp10{genus}(100);Unassigned{species}(0)	Bacteria	Acidobacteria	Acidobacteria_Gp10			Gp10	Unassigned
ASV168	8	26	0	0	12	0	0	0	14	0	0	85	47	29	0	221	Bacteria{superkingdom}(99);Actinobacteria{phylum}(99);Actinobacteria{class}(99);Actinomycetales{order}(99);Streptomycetaceae{family}(99);Streptomyces{genus}(99);Unassigned{species}(0)	Bacteria	Actinobacteria	Actinobacteria	Actinomycetales	Streptomycetaceae	Streptomyces	Unassigned
ASV169	269	876	341	0	2010	0	254	172	49	0	392	7	20	13	0	4403	Bacteria{superkingdom}(100);Actinobacteria{phylum}(100);Actinobacteria{class}(100);Actinomycetales{order}(100);Streptomycetaceae{family}(100);Streptomyces{genus}(100);Unassigned{species}(0)	Bacteria	Actinobacteria	Actinobacteria	Actinomycetales	Streptomycetaceae	Streptomyces	Unassigned
ASV170	0	0	0	0	0	0	0	0	0	59	0	81	0	42	0	182	Bacteria{superkingdom}(99);Proteobacteria{phylum}(99);Alphaproteobacteria{class}(99);Rhizobiales{order}(99);Methylobacteriaceae{family}(99);Microvirga{genus}(99);Unassigned{species}(0)	Bacteria	Proteobacteria	Alphaproteobacteria	Rhizobiales	Methylobacteriaceae	Microvirga	Unassigned
ASV172	0	0	0	0	0	0	0	17	0	0	0	0	0	75	0	92	Bacteria{superkingdom}(100);Chloroflexi{phylum}(100);Chloroflexia{class}(100);Kallotenuales{order}(100);Kallotenuaceae{family}(100);Kallotenue{genus}(100);Unassigned{species}(0)	Bacteria	Chloroflexi	Chloroflexia	Kallotenuales	Kallotenuaceae	Kallotenue	Unassigned
ASV173	141	114	164	225	412	30	43	52	57	118	0	75	44	131	91	1697	Bacteria{superkingdom}(100);Actinobacteria{phylum}(100);Actinobacteria{class}(100);Solirubrobacterales{order}(100);Solirubrobacteraceae{family}(100);Solirubrobacter{genus}(100);Unassigned{species}(0)	Bacteria	Actinobacteria	Actinobacteria	Solirubrobacterales	Solirubrobacteraceae	Solirubrobacter	Unassigned
ASV174	0	231	0	0	0	1083	535	787	0	2113	0	0	0	0	0	4749	Bacteria{superkingdom}(100);Acidobacteria{phylum}(100);Acidobacteria_Gp4{class}(100);{order}(100);{family}(100);Gp4{genus}(100);Unassigned{species}(0)	Bacteria	Acidobacteria	Acidobacteria_Gp4			Gp4	Unassigned
ASV176	47	0	15	32	0	0	0	64	0	1730	0	0	0	0	108	1996	Bacteria{superkingdom}(84);Acidobacteria{phylum}(84);Acidobacteria_Gp7{class}(84);{order}(84);{family}(84);Gp7{genus}(84);uncultured_soil_bacterium{species}(84)	Bacteria	Acidobacteria	Acidobacteria_Gp7			Gp7	uncultured_soil_bacterium
ASV177	0	0	0	77	0	0	0	0	0	0	0	0	0	0	0	77	Bacteria{superkingdom}(100);Acidobacteria{phylum}(100);Acidobacteria_Gp10{class}(100);{order}(100);{family}(100);Gp10{genus}(100);Unassigned{species}(0)	Bacteria	Acidobacteria	Acidobacteria_Gp10			Gp10	Unassigned
ASV178	329	114	157	174	228	235	304	469	251	272	188	15	17	96	65	2914	Bacteria{superkingdom}(100);Firmicutes{phylum}(100);Bacilli{class}(100);Bacillales{order}(100);Bacillaceae_1{family}(100);Bacillus{genus}(100);Unassigned{species}(0)	Bacteria	Firmicutes	Bacilli	Bacillales	Bacillaceae_1	Bacillus	Unassigned
ASV179	274	37	129	202	338	49	142	57	102	106	87	52	75	75	67	1792	Bacteria{superkingdom}(97);Proteobacteria{phylum}(97);Alphaproteobacteria{class}(97);Rhizobiales{order}(97);Xanthobacteraceae{family}(97);Pseudolabrys{genus}(97);Unassigned{species}(0)	Bacteria	Proteobacteria	Alphaproteobacteria	Rhizobiales	Xanthobacteraceae	Pseudolabrys	Unassigned
ASV180	70	114	13	37	64	500	429	325	134	905	0	97	25	66	286	3065	Bacteria{superkingdom}(100);Actinobacteria{phylum}(100);Actinobacteria{class}(100);{order}(100);{family}(100);{genus}(100);Unassigned{species}(0)	Bacteria	Actinobacteria	Actinobacteria				Unassigned
ASV181	0	110	45	183	281	257	143	64	236	195	312	177	185	0	119	2307	Bacteria{superkingdom}(99);Acidobacteria{phylum}(99);Acidobacteria_Gp6{class}(99);{order}(99);{family}(99);Gp6{genus}(99);Unassigned{species}(0)	Bacteria	Acidobacteria	Acidobacteria_Gp6			Gp6	Unassigned
ASV183	0	0	287	99	3664	394	893	119	319	1501	1373	310	17	1	485	9462	Bacteria{superkingdom}(100);Proteobacteria{phylum}(100);Alphaproteobacteria{class}(100);Rhizobiales{order}(100);Methylobacteriaceae{family}(100);Microvirga{genus}(100);Unassigned{species}(0)	Bacteria	Proteobacteria	Alphaproteobacteria	Rhizobiales	Methylobacteriaceae	Microvirga	Unassigned
ASV184	0	0	0	0	0	0	0	0	0	0	0	0	4	0	4	8	Bacteria{superkingdom}(100);Bacteroidetes{phylum}(100);Sphingobacteriia{class}(100);Sphingobacteriales{order}(100);Sphingobacteriaceae{family}(100);Olivibacter{genus}(100);Unassigned{species}(0)	Bacteria	Bacteroidetes	Sphingobacteriia	Sphingobacteriales	Sphingobacteriaceae	Olivibacter	Unassigned
ASV185	19	93	22	196	0	0	0	0	0	0	22	0	0	186	20	558	Bacteria{superkingdom}(100);Acidobacteria{phylum}(100);Acidobacteria_Gp10{class}(100);{order}(100);{family}(100);Gp10{genus}(100);Unassigned{species}(0)	Bacteria	Acidobacteria	Acidobacteria_Gp10			Gp10	Unassigned
ASV186	372	122	83	196	131	318	668	139	0	405	0	0	0	0	25	2459	Bacteria{superkingdom}(100);Chloroflexi{phylum}(100);Chloroflexia{class}(100);{order}(100);{family}(100);{genus}(100);uncultured_bacterium{species}(100)	Bacteria	Chloroflexi	Chloroflexia				uncultured_bacterium
ASV187	0	0	0	330	40	0	0	0	41	34	0	35	0	121	0	601	Bacteria{superkingdom}(100);Actinobacteria{phylum}(100);Actinobacteria{class}(100);Actinomycetales{order}(100);Pseudonocardiaceae{family}(100);Amycolatopsis{genus}(100);Unassigned{species}(0)	Bacteria	Actinobacteria	Actinobacteria	Actinomycetales	Pseudonocardiaceae	Amycolatopsis	Unassigned
ASV188	0	473	0	0	27	66	452	173	0	318	16	35	320	447	83	2410	Bacteria{superkingdom}(90);Proteobacteria{phylum}(90);Alphaproteobacteria{class}(90);Alphaproteobacteria_incertae_sedis{order}(90);{family}(90);Geminicoccus{genus}(90);uncultured_bacterium{species}(90)	Bacteria	Proteobacteria	Alphaproteobacteria	Alphaproteobacteria_incertae_sedis		Geminicoccus	uncultured_bacterium
ASV189	446	0	531	1686	1052	32	0	85	1187	998	62	0	0	0	0	6079	Bacteria{superkingdom}(90);Firmicutes{phylum}(90);Bacilli{class}(90);Bacillales{order}(90);Bacillaceae_1{family}(90);Bacillus{genus}(90);Unassigned{species}(0)	Bacteria	Firmicutes	Bacilli	Bacillales	Bacillaceae_1	Bacillus	Unassigned
ASV190	0	0	0	0	0	0	0	0	18	739	0	0	0	0	0	757	Bacteria{superkingdom}(94);Bacteroidetes{phylum}(94);Cytophagia{class}(94);Cytophagales{order}(94);Cytophagaceae{family}(94);Rufibacter{genus}(94);uncultured_bacterium{species}(94)	Bacteria	Bacteroidetes	Cytophagia	Cytophagales	Cytophagaceae	Rufibacter	uncultured_bacterium
ASV191	0	0	0	30	0	0	0	0	21	76	0	57	52	32	0	268	Bacteria{superkingdom}(98);Proteobacteria{phylum}(98);Betaproteobacteria{class}(98);Burkholderiales{order}(98);Oxalobacteraceae{family}(98);Noviherbaspirillum{genus}(98);Unassigned{species}(0)	Bacteria	Proteobacteria	Betaproteobacteria	Burkholderiales	Oxalobacteraceae	Noviherbaspirillum	Unassigned
ASV192	0	0	0	0	0	0	0	0	14	81	0	0	0	0	0	95	Bacteria{superkingdom}(99);Proteobacteria{phylum}(99);Alphaproteobacteria{class}(99);Rhodobacterales{order}(99);Rhodobacteraceae{family}(99);Paracoccus{genus}(99);Unassigned{species}(0)	Bacteria	Proteobacteria	Alphaproteobacteria	Rhodobacterales	Rhodobacteraceae	Paracoccus	Unassigned
ASV193	0	0	79	2077	2135	144	66	63	0	138	0	46	0	0	0	4748	Bacteria{superkingdom}(92);Actinobacteria{phylum}(92);Actinobacteria{class}(92);Actinomycetales{order}(92);Pseudonocardiaceae{family}(92);Actinophytocola{genus}(92);uncultured_bacterium{species}(92)	Bacteria	Actinobacteria	Actinobacteria	Actinomycetales	Pseudonocardiaceae	Actinophytocola	uncultured_bacterium
ASV194	0	0	0	0	154	0	0	204	372	125	533	12	1589	304	584	3877	Bacteria{superkingdom}(100);Bacteroidetes{phylum}(100);Cytophagia{class}(100);Cytophagales{order}(100);Cytophagaceae{family}(100);Adhaeribacter{genus}(100);Unassigned{species}(0)	Bacteria	Bacteroidetes	Cytophagia	Cytophagales	Cytophagaceae	Adhaeribacter	Unassigned
ASV195	73	56	39	217	305	63	313	219	265	176	81	122	0	0	97	2026	Bacteria{superkingdom}(100);Proteobacteria{phylum}(100);Deltaproteobacteria{class}(100);{order}(100);{family}(100);{genus}(100);uncultured_Acidobacteriales_bacterium{species}(100)	Bacteria	Proteobacteria	Deltaproteobacteria				uncultured_Acidobacteriales_bacterium
ASV196	107	547	52	157	213	293	233	131	108	98	26	21	41	9	48	2084	Bacteria{superkingdom}(100);Proteobacteria{phylum}(100);Alphaproteobacteria{class}(100);Rhizobiales{order}(100);Rhodobiaceae{family}(100);{genus}(100);uncultured_soil_bacterium{species}(100)	Bacteria	Proteobacteria	Alphaproteobacteria	Rhizobiales	Rhodobiaceae		uncultured_soil_bacterium
ASV197	0	114	0	106	0	0	0	38	35	68	0	412	120	110	0	1003	Bacteria{superkingdom}(100);Chloroflexi{phylum}(100);Thermomicrobia{class}(100);Unassigned{order}(0);Unassigned{family}(0);Unassigned{genus}(0);Unassigned{species}(0)	Bacteria	Chloroflexi	Thermomicrobia	Unassigned	Unassigned	Unassigned	Unassigned
ASV198	48	312	50	0	445	160	64	52	132	94	34	0	0	0	68	1459	Bacteria{superkingdom}(100);Acidobacteria{phylum}(100);Acidobacteria_Gp6{class}(100);{order}(100);{family}(100);Gp6{genus}(100);Unassigned{species}(0)	Bacteria	Acidobacteria	Acidobacteria_Gp6			Gp6	Unassigned
ASV200	10	26	12	50	35	47	35	85	231	181	523	76	354	46	213	1924	Bacteria{superkingdom}(99);Proteobacteria{phylum}(99);Betaproteobacteria{class}(99);Burkholderiales{order}(99);Comamonadaceae{family}(99);Unassigned{genus}(0);Unassigned{species}(0)	Bacteria	Proteobacteria	Betaproteobacteria	Burkholderiales	Comamonadaceae	Unassigned	Unassigned
ASV201	238	337	104	434	1180	177	544	371	51	1333	510	241	553	700	346	7119	Bacteria{superkingdom}(100);Actinobacteria{phylum}(100);Actinobacteria{class}(100);Actinomycetales{order}(100);Micrococcaceae{family}(100);Arthrobacter{genus}(100);Unassigned{species}(0)	Bacteria	Actinobacteria	Actinobacteria	Actinomycetales	Micrococcaceae	Arthrobacter	Unassigned
ASV202	0	177	0	6	0	49	103	59	0	157	4	17	88	272	73	1005	Bacteria{superkingdom}(90);Armatimonadetes{phylum}(90);Armatimonadia{class}(90);Armatimonadales{order}(90);Armatimonadaceae{family}(90);Armatimonas/Armatimonadetes_gp1{genus}(90);uncultured_bacterium{species}(90)	Bacteria	Armatimonadetes	Armatimonadia	Armatimonadales	Armatimonadaceae	Armatimonas/Armatimonadetes_gp1	uncultured_bacterium
ASV203	85	37	4	0	0	0	43	131	15	171	0	203	0	0	0	689	Bacteria{superkingdom}(92);Chloroflexi{phylum}(92);Chloroflexia{class}(92);Kallotenuales{order}(92);Kallotenuaceae{family}(92);Kallotenue{genus}(92);uncultured_bacterium{species}(92)	Bacteria	Chloroflexi	Chloroflexia	Kallotenuales	Kallotenuaceae	Kallotenue	uncultured_bacterium
ASV204	46	493	0	0	29	0	113	616	8	0	0	0	0	0	0	1305	Bacteria{superkingdom}(100);Unassigned{phylum}(0);Unassigned{class}(0);Unassigned{order}(0);Unassigned{family}(0);Unassigned{genus}(0);Unassigned{species}(0)	Bacteria	Unassigned	Unassigned	Unassigned	Unassigned	Unassigned	Unassigned
ASV205	0	0	0	127	0	97	203	227	302	475	153	98	235	45	365	2327	Bacteria{superkingdom}(100);Proteobacteria{phylum}(100);Betaproteobacteria{class}(100);Burkholderiales{order}(100);Oxalobacteraceae{family}(100);Unassigned{genus}(0);Unassigned{species}(0)	Bacteria	Proteobacteria	Betaproteobacteria	Burkholderiales	Oxalobacteraceae	Unassigned	Unassigned
ASV206	88	333	113	285	129	50	67	136	40	300	205	155	34	783	117	2835	Bacteria{superkingdom}(99);Chloroflexi{phylum}(99);Thermomicrobia{class}(99);Sphaerobacterales{order}(99);Sphaerobacteraceae{family}(99);Unassigned{genus}(0);Unassigned{species}(0)	Bacteria	Chloroflexi	Thermomicrobia	Sphaerobacterales	Sphaerobacteraceae	Unassigned	Unassigned
ASV207	0	0	0	0	0	0	0	0	0	0	0	0	41	0	0	41	Bacteria{superkingdom}(100);Chloroflexi{phylum}(100);Chloroflexia{class}(100);Kallotenuales{order}(100);Kallotenuaceae{family}(100);Kallotenue{genus}(100);Unassigned{species}(0)	Bacteria	Chloroflexi	Chloroflexia	Kallotenuales	Kallotenuaceae	Kallotenue	Unassigned
ASV208	225	0	249	127	354	43	0	325	245	167	90	36	155	75	57	2148	Bacteria{superkingdom}(86);Firmicutes{phylum}(86);Bacilli{class}(86);Bacillales{order}(86);Bacillaceae_1{family}(86);Bacillus{genus}(86);Bacillus_funiculus{species}(86)	Bacteria	Firmicutes	Bacilli	Bacillales	Bacillaceae_1	Bacillus	Bacillus_funiculus
ASV209	0	71	0	21	0	0	0	63	0	93	0	0	0	11	0	259	Bacteria{superkingdom}(100);Actinobacteria{phylum}(100);Actinobacteria{class}(100);Rubrobacterales{order}(100);Rubrobacteraceae{family}(100);Rubrobacter{genus}(100);Unassigned{species}(0)	Bacteria	Actinobacteria	Actinobacteria	Rubrobacterales	Rubrobacteraceae	Rubrobacter	Unassigned
ASV210	0	60	0	20	0	0	0	0	47	103	0	1969	222	61	0	2482	Bacteria{superkingdom}(80);Actinobacteria{phylum}(80);Actinobacteria{class}(80);Actinomycetales{order}(80);Pseudonocardiaceae{family}(80);Actinophytocola{genus}(80);uncultured_bacterium{species}(80)	Bacteria	Actinobacteria	Actinobacteria	Actinomycetales	Pseudonocardiaceae	Actinophytocola	uncultured_bacterium
ASV211	121	0	67	446	433	80	97	70	243	38	137	33	53	16	78	1912	Bacteria{superkingdom}(100);Chloroflexi{phylum}(100);Caldilineae{class}(100);Caldilineales{order}(100);Caldilineaceae{family}(100);Litorilinea{genus}(100);uncultured_Litorilinea_sp.{species}(100)	Bacteria	Chloroflexi	Caldilineae	Caldilineales	Caldilineaceae	Litorilinea	uncultured_Litorilinea_sp.
ASV212	53	0	104	88	0	222	484	187	272	646	111	53	1106	24	313	3663	Bacteria{superkingdom}(100);Actinobacteria{phylum}(100);Actinobacteria{class}(100);Solirubrobacterales{order}(100);Unassigned{family}(0);Unassigned{genus}(0);Unassigned{species}(0)	Bacteria	Actinobacteria	Actinobacteria	Solirubrobacterales	Unassigned	Unassigned	Unassigned
ASV213	65	209	0	0	266	0	0	0	0	0	0	0	0	0	0	540	Bacteria{superkingdom}(94);Acidobacteria{phylum}(94);Acidobacteria_Gp4{class}(94);{order}(94);{family}(94);Gp4{genus}(94);uncultured_Rhodopseudomonas_sp.{species}(94)	Bacteria	Acidobacteria	Acidobacteria_Gp4			Gp4	uncultured_Rhodopseudomonas_sp.
ASV214	79	134	111	237	369	261	165	53	129	219	143	37	108	100	238	2383	Bacteria{superkingdom}(100);Proteobacteria{phylum}(100);Alphaproteobacteria{class}(100);Rhodospirillales{order}(100);{family}(100);Reyranella{genus}(100);Unassigned{species}(0)	Bacteria	Proteobacteria	Alphaproteobacteria	Rhodospirillales		Reyranella	Unassigned
ASV215	0	0	0	0	70	0	0	0	0	0	0	0	0	72	0	142	Bacteria{superkingdom}(90);Actinobacteria{phylum}(90);Actinobacteria{class}(90);Actinomycetales{order}(90);Streptomycetaceae{family}(90);Streptomyces{genus}(90);Unassigned{species}(0)	Bacteria	Actinobacteria	Actinobacteria	Actinomycetales	Streptomycetaceae	Streptomyces	Unassigned
ASV216	241	785	331	68	492	168	59	22	268	133	265	159	222	209	311	3733	Bacteria{superkingdom}(86);Actinobacteria{phylum}(86);Actinobacteria{class}(86);{order}(86);{family}(86);{genus}(86);Unassigned{species}(0)	Bacteria	Actinobacteria	Actinobacteria				Unassigned
ASV217	56	310	0	53	576	6062	45	72	0	442	13	0	0	0	14	7643	Bacteria{superkingdom}(91);Acidobacteria{phylum}(91);Acidobacteria_Gp7{class}(91);{order}(91);{family}(91);Gp7{genus}(91);uncultured_Anaeromyxobacter_sp.{species}(91)	Bacteria	Acidobacteria	Acidobacteria_Gp7			Gp7	uncultured_Anaeromyxobacter_sp.
ASV218	115	0	52	153	126	51	154	160	154	351	0	72	102	35	0	1525	Bacteria{superkingdom}(100);Actinobacteria{phylum}(100);Actinobacteria{class}(100);Actinomycetales{order}(100);Nocardioidaceae{family}(100);Nocardioides{genus}(100);Unassigned{species}(0)	Bacteria	Actinobacteria	Actinobacteria	Actinomycetales	Nocardioidaceae	Nocardioides	Unassigned
ASV220	25	114	34	44	32	45	132	109	44	172	17	205	293	172	120	1558	Bacteria{superkingdom}(87);Actinobacteria{phylum}(87);Actinobacteria{class}(87);Actinomycetales{order}(87);Geodermatophilaceae{family}(87);Blastococcus{genus}(87);Unassigned{species}(0)	Bacteria	Actinobacteria	Actinobacteria	Actinomycetales	Geodermatophilaceae	Blastococcus	Unassigned
ASV221	56	30	176	66	470	22	27	10	36	34	0	0	0	8	2	937	Bacteria{superkingdom}(100);Acidobacteria{phylum}(100);Acidobacteria_Gp4{class}(100);{order}(100);{family}(100);Gp4{genus}(100);Unassigned{species}(0)	Bacteria	Acidobacteria	Acidobacteria_Gp4			Gp4	Unassigned
ASV222	0	0	0	0	0	0	0	0	21	351	0	17	69	0	0	458	Bacteria{superkingdom}(100);Acidobacteria{phylum}(100);Acidobacteria_Gp4{class}(100);{order}(100);{family}(100);Gp4{genus}(100);Unassigned{species}(0)	Bacteria	Acidobacteria	Acidobacteria_Gp4			Gp4	Unassigned
ASV223	70	70	62	877	2050	108	92	101	45	9	712	168	4	74	180	4622	Bacteria{superkingdom}(100);Proteobacteria{phylum}(100);Gammaproteobacteria{class}(100);Xanthomonadales{order}(100);Sinobacteraceae{family}(100);Steroidobacter{genus}(100);Unassigned{species}(0)	Bacteria	Proteobacteria	Gammaproteobacteria	Xanthomonadales	Sinobacteraceae	Steroidobacter	Unassigned
ASV224	324	355	384	1426	1026	0	226	59	58	0	16	29	90	0	206	4199	Bacteria{superkingdom}(89);Proteobacteria{phylum}(89);Alphaproteobacteria{class}(89);Sphingomonadales{order}(89);Sphingomonadaceae{family}(89);Novosphingobium{genus}(89);Unassigned{species}(0)	Bacteria	Proteobacteria	Alphaproteobacteria	Sphingomonadales	Sphingomonadaceae	Novosphingobium	Unassigned
ASV226	221	261	320	385	753	712	275	146	163	154	135	39	14	91	131	3800	Bacteria{superkingdom}(100);Chloroflexi{phylum}(100);Chloroflexia{class}(100);Kallotenuales{order}(100);Kallotenuaceae{family}(100);Kallotenue{genus}(100);uncultured_bacterium{species}(100)	Bacteria	Chloroflexi	Chloroflexia	Kallotenuales	Kallotenuaceae	Kallotenue	uncultured_bacterium
ASV227	151	100	158	258	489	0	0	17	60	0	0	20	0	0	0	1253	Bacteria{superkingdom}(100);Actinobacteria{phylum}(100);Actinobacteria{class}(100);Actinomycetales{order}(100);Jiangellaceae{family}(100);Unassigned{genus}(0);Unassigned{species}(0)	Bacteria	Actinobacteria	Actinobacteria	Actinomycetales	Jiangellaceae	Unassigned	Unassigned
ASV228	174	37	111	589	507	52	66	44	18	78	36	0	104	61	51	1928	Bacteria{superkingdom}(92);Proteobacteria{phylum}(92);Alphaproteobacteria{class}(92);Rhizobiales{order}(92);Rhizobiaceae{family}(92);Neorhizobium{genus}(92);Unassigned{species}(0)	Bacteria	Proteobacteria	Alphaproteobacteria	Rhizobiales	Rhizobiaceae	Neorhizobium	Unassigned
ASV229	149	209	295	0	216	0	0	75	0	94	0	64	33	71	0	1206	Bacteria{superkingdom}(100);Chloroflexi{phylum}(100);{class}(100);{order}(100);{family}(100);{genus}(100);uncultured_Anaerolineae_bacterium{species}(100)	Bacteria	Chloroflexi					uncultured_Anaerolineae_bacterium
ASV230	0	21	0	0	0	0	0	0	0	37	0	203	0	29	0	290	Bacteria{superkingdom}(100);Chloroflexi{phylum}(100);Chloroflexia{class}(100);Kallotenuales{order}(100);Kallotenuaceae{family}(100);Kallotenue{genus}(100);Unassigned{species}(0)	Bacteria	Chloroflexi	Chloroflexia	Kallotenuales	Kallotenuaceae	Kallotenue	Unassigned
ASV231	183	575	140	242	418	91	98	55	24	178	0	23	64	349	16	2456	Bacteria{superkingdom}(100);Actinobacteria{phylum}(100);Actinobacteria{class}(100);Acidimicrobiales{order}(100);Acidimicrobiaceae{family}(100);Ilumatobacter{genus}(100);Unassigned{species}(0)	Bacteria	Actinobacteria	Actinobacteria	Acidimicrobiales	Acidimicrobiaceae	Ilumatobacter	Unassigned
ASV232	0	0	0	145	0	0	0	0	0	0	0	0	0	0	0	145	Bacteria{superkingdom}(90);Actinobacteria{phylum}(90);Actinobacteria{class}(90);Actinomycetales{order}(90);Glycomycetaceae{family}(90);Glycomyces{genus}(90);Glycomyces_scopariae{species}(90)	Bacteria	Actinobacteria	Actinobacteria	Actinomycetales	Glycomycetaceae	Glycomyces	Glycomyces_scopariae
ASV233	176	23	0	769	140	233	92	571	442	66	423	31	397	17	13	3393	Bacteria{superkingdom}(87);Firmicutes{phylum}(87);Bacilli{class}(87);Bacillales{order}(87);Bacillaceae_1{family}(87);Domibacillus{genus}(87);uncultured_bacterium{species}(87)	Bacteria	Firmicutes	Bacilli	Bacillales	Bacillaceae_1	Domibacillus	uncultured_bacterium
ASV234	0	155	0	0	0	0	447	115	73	293	0	101	273	267	0	1724	Bacteria{superkingdom}(97);Acidobacteria{phylum}(97);Acidobacteria_Gp3{class}(97);{order}(97);{family}(97);Gp3{genus}(97);Unassigned{species}(0)	Bacteria	Acidobacteria	Acidobacteria_Gp3			Gp3	Unassigned
ASV235	61	0	51	60	0	46	59	82	44	116	0	84	27	51	84	765	Bacteria{superkingdom}(89);Actinobacteria{phylum}(89);Actinobacteria{class}(89);Solirubrobacterales{order}(89);Solirubrobacteraceae{family}(89);Solirubrobacter{genus}(89);Unassigned{species}(0)	Bacteria	Actinobacteria	Actinobacteria	Solirubrobacterales	Solirubrobacteraceae	Solirubrobacter	Unassigned
ASV236	0	473	38	0	0	0	0	106	0	91	0	0	0	0	0	708	Bacteria{superkingdom}(81);Chloroflexi{phylum}(81);Thermomicrobia{class}(81);Sphaerobacterales{order}(81);Sphaerobacteraceae{family}(81);Nitrolancea{genus}(81);Unassigned{species}(0)	Bacteria	Chloroflexi	Thermomicrobia	Sphaerobacterales	Sphaerobacteraceae	Nitrolancea	Unassigned
ASV237	0	0	0	0	134	0	0	0	0	0	0	0	0	44	0	178	Bacteria{superkingdom}(100);Acidobacteria{phylum}(100);Acidobacteria_Gp4{class}(100);{order}(100);{family}(100);Blastocatella{genus}(100);Unassigned{species}(0)	Bacteria	Acidobacteria	Acidobacteria_Gp4			Blastocatella	Unassigned
ASV238	70	0	37	112	470	721	858	494	415	332	132	156	14	249	274	4334	Bacteria{superkingdom}(100);Nitrospirae{phylum}(100);Nitrospira{class}(100);Nitrospirales{order}(100);Nitrospiraceae{family}(100);Nitrospira{genus}(100);Unassigned{species}(0)	Bacteria	Nitrospirae	Nitrospira	Nitrospirales	Nitrospiraceae	Nitrospira	Unassigned
ASV239	0	51	0	0	0	0	0	0	0	40	0	0	22	0	0	113	Bacteria{superkingdom}(100);Proteobacteria{phylum}(100);Alphaproteobacteria{class}(100);Rhizobiales{order}(100);Hyphomicrobiaceae{family}(100);Devosia{genus}(100);Unassigned{species}(0)	Bacteria	Proteobacteria	Alphaproteobacteria	Rhizobiales	Hyphomicrobiaceae	Devosia	Unassigned
ASV240	0	0	0	0	0	0	0	0	0	51	8	39	39	36	0	173	Bacteria{superkingdom}(92);Proteobacteria{phylum}(92);Alphaproteobacteria{class}(92);Rhizobiales{order}(92);{family}(92);{genus}(92);uncultured_endolithic_bacterium{species}(92)	Bacteria	Proteobacteria	Alphaproteobacteria	Rhizobiales			uncultured_endolithic_bacterium
ASV241	154	183	175	0	0	0	0	0	0	68	0	0	0	0	0	580	Bacteria{superkingdom}(99);Actinobacteria{phylum}(99);Actinobacteria{class}(99);Actinomycetales{order}(99);Streptomycetaceae{family}(99);Streptomyces{genus}(99);Unassigned{species}(0)	Bacteria	Actinobacteria	Actinobacteria	Actinomycetales	Streptomycetaceae	Streptomyces	Unassigned
ASV243	61	0	182	404	406	161	0	37	63	0	0	24	0	0	47	1385	Bacteria{superkingdom}(94);Bacteroidetes{phylum}(94);Sphingobacteriia{class}(94);Sphingobacteriales{order}(94);Chitinophagaceae{family}(94);{genus}(94);uncultured_Cytophaga_sp.{species}(94)	Bacteria	Bacteroidetes	Sphingobacteriia	Sphingobacteriales	Chitinophagaceae		uncultured_Cytophaga_sp.
ASV244	194	347	237	248	564	73	182	51	102	245	191	0	135	28	40	2637	Bacteria{superkingdom}(100);Actinobacteria{phylum}(100);Actinobacteria{class}(100);Actinomycetales{order}(100);Nocardioidaceae{family}(100);Nocardioides{genus}(100);Unassigned{species}(0)	Bacteria	Actinobacteria	Actinobacteria	Actinomycetales	Nocardioidaceae	Nocardioides	Unassigned
ASV245	94	195	79	297	308	43	67	0	110	0	99	43	0	0	59	1394	Bacteria{superkingdom}(100);Actinobacteria{phylum}(100);Actinobacteria{class}(100);Actinomycetales{order}(100);Micromonosporaceae{family}(100);Unassigned{genus}(0);Unassigned{species}(0)	Bacteria	Actinobacteria	Actinobacteria	Actinomycetales	Micromonosporaceae	Unassigned	Unassigned
ASV246	0	28	0	0	95	0	0	26	16	93	49	39	0	40	30	416	Bacteria{superkingdom}(93);Proteobacteria{phylum}(93);Alphaproteobacteria{class}(93);Rhizobiales{order}(93);Methylobacteriaceae{family}(93);Microvirga{genus}(93);uncultured_alpha_proteobacterium{species}(93)	Bacteria	Proteobacteria	Alphaproteobacteria	Rhizobiales	Methylobacteriaceae	Microvirga	uncultured_alpha_proteobacterium
ASV247	0	23	0	0	0	0	0	0	16	21	0	14	0	55	0	129	Bacteria{superkingdom}(97);Chloroflexi{phylum}(97);Chloroflexia{class}(97);Kallotenuales{order}(97);Kallotenuaceae{family}(97);Kallotenue{genus}(97);uncultured_endolithic_bacterium{species}(97)	Bacteria	Chloroflexi	Chloroflexia	Kallotenuales	Kallotenuaceae	Kallotenue	uncultured_endolithic_bacterium
ASV248	0	0	0	0	0	0	0	0	0	0	0	26	0	0	0	26	Bacteria{superkingdom}(100);Bacteroidetes{phylum}(100);Cytophagia{class}(100);Cytophagales{order}(100);Cytophagaceae{family}(100);Dyadobacter{genus}(100);Cytophagaceae_bacterium_PTR3{species}(100)	Bacteria	Bacteroidetes	Cytophagia	Cytophagales	Cytophagaceae	Dyadobacter	Cytophagaceae_bacterium_PTR3
ASV249	0	0	6	78	0	50	147	151	75	383	69	634	760	13	79	2445	Bacteria{superkingdom}(100);Actinobacteria{phylum}(100);Actinobacteria{class}(100);Actinomycetales{order}(100);Nocardioidaceae{family}(100);Nocardioides{genus}(100);Unassigned{species}(0)	Bacteria	Actinobacteria	Actinobacteria	Actinomycetales	Nocardioidaceae	Nocardioides	Unassigned
ASV250	9	0	6	23	0	0	0	38	44	58	0	132	38	51	9	408	Bacteria{superkingdom}(99);Actinobacteria{phylum}(99);Actinobacteria{class}(99);Actinomycetales{order}(99);Geodermatophilaceae{family}(99);Geodermatophilus{genus}(99);Unassigned{species}(0)	Bacteria	Actinobacteria	Actinobacteria	Actinomycetales	Geodermatophilaceae	Geodermatophilus	Unassigned
ASV251	0	0	0	121	222	467	384	325	83	538	274	317	0	89	538	3358	Bacteria{superkingdom}(98);Chloroflexi{phylum}(98);Anaerolineae{class}(98);Anaerolineales{order}(98);Anaerolineaceae{family}(98);{genus}(98);uncultured_soil_bacterium{species}(98)	Bacteria	Chloroflexi	Anaerolineae	Anaerolineales	Anaerolineaceae		uncultured_soil_bacterium
ASV252	0	25	0	0	67	0	0	0	0	0	0	0	0	0	0	92	Bacteria{superkingdom}(95);Acidobacteria{phylum}(95);Acidobacteria_Gp10{class}(95);{order}(95);{family}(95);Gp10{genus}(95);uncultured_Pelobacter_sp.{species}(95)	Bacteria	Acidobacteria	Acidobacteria_Gp10			Gp10	uncultured_Pelobacter_sp.
ASV253	245	203	278	262	317	360	866	104	176	230	12	0	149	20	157	3379	Bacteria{superkingdom}(97);Chloroflexi{phylum}(97);Anaerolineae{class}(97);Anaerolineales{order}(97);Anaerolineaceae{family}(97);{genus}(97);uncultured_soil_bacterium{species}(97)	Bacteria	Chloroflexi	Anaerolineae	Anaerolineales	Anaerolineaceae		uncultured_soil_bacterium
ASV254	23	308	0	0	0	0	0	0	0	0	7	0	0	37	0	375	Bacteria{superkingdom}(94);Acidobacteria{phylum}(94);Acidobacteria_Gp4{class}(94);{order}(94);{family}(94);Aridibacter{genus}(94);Unassigned{species}(0)	Bacteria	Acidobacteria	Acidobacteria_Gp4			Aridibacter	Unassigned
ASV256	0	0	0	0	0	8	26	17	51	55	7	134	77	38	15	428	Bacteria{superkingdom}(99);Actinobacteria{phylum}(99);Actinobacteria{class}(99);Acidimicrobiales{order}(99);{family}(99);{genus}(99);uncultured_organism{species}(99)	Bacteria	Actinobacteria	Actinobacteria	Acidimicrobiales			uncultured_organism
ASV257	152	0	0	117	0	35	53	320	19	29	0	135	74	42	5	981	Bacteria{superkingdom}(100);Firmicutes{phylum}(100);Bacilli{class}(100);Bacillales{order}(100);Bacillaceae_1{family}(100);Domibacillus{genus}(100);Unassigned{species}(0)	Bacteria	Firmicutes	Bacilli	Bacillales	Bacillaceae_1	Domibacillus	Unassigned
ASV258	35	136	45	128	0	0	54	121	47	93	0	55	47	80	23	864	Bacteria{superkingdom}(98);Acidobacteria{phylum}(98);Acidobacteria_Gp3{class}(98);{order}(98);{family}(98);Gp3{genus}(98);uncultured_Candidatus_Solibacter_sp.{species}(98)	Bacteria	Acidobacteria	Acidobacteria_Gp3			Gp3	uncultured_Candidatus_Solibacter_sp.
ASV259	0	0	0	0	0	0	0	0	0	0	0	137	0	0	0	137	Bacteria{superkingdom}(100);Proteobacteria{phylum}(100);Alphaproteobacteria{class}(100);Rhizobiales{order}(100);Hyphomicrobiaceae{family}(100);Devosia{genus}(100);Unassigned{species}(0)	Bacteria	Proteobacteria	Alphaproteobacteria	Rhizobiales	Hyphomicrobiaceae	Devosia	Unassigned
ASV260	81	316	164	93	0	0	0	576	27	0	37	91	0	0	0	1385	Bacteria{superkingdom}(100);Acidobacteria{phylum}(100);Acidobacteria_Gp10{class}(100);{order}(100);{family}(100);Gp10{genus}(100);Unassigned{species}(0)	Bacteria	Acidobacteria	Acidobacteria_Gp10			Gp10	Unassigned
ASV261	38	304	42	0	178	40	164	69	57	205	43	82	290	136	125	1773	Bacteria{superkingdom}(100);Proteobacteria{phylum}(100);Alphaproteobacteria{class}(100);Caulobacterales{order}(100);Caulobacteraceae{family}(100);{genus}(100);Unassigned{species}(0)	Bacteria	Proteobacteria	Alphaproteobacteria	Caulobacterales	Caulobacteraceae		Unassigned
ASV262	77	296	48	385	507	82	85	32	76	188	96	131	102	114	146	2365	Bacteria{superkingdom}(98);Proteobacteria{phylum}(98);Alphaproteobacteria{class}(98);Rhizobiales{order}(98);Bradyrhizobiaceae{family}(98);{genus}(98);Unassigned{species}(0)	Bacteria	Proteobacteria	Alphaproteobacteria	Rhizobiales	Bradyrhizobiaceae		Unassigned
ASV263	79	0	104	99	696	80	167	151	125	197	197	114	217	277	591	3094	Bacteria{superkingdom}(98);Acidobacteria{phylum}(98);Acidobacteria_Gp3{class}(98);{order}(98);{family}(98);Gp3{genus}(98);Unassigned{species}(0)	Bacteria	Acidobacteria	Acidobacteria_Gp3			Gp3	Unassigned
ASV264	92	91	70	172	1367	0	340	54	55	35	44	8	0	0	33	2361	Bacteria{superkingdom}(83);Bacteroidetes{phylum}(83);Sphingobacteriia{class}(83);Sphingobacteriales{order}(83);Chitinophagaceae{family}(83);{genus}(83);Unassigned{species}(0)	Bacteria	Bacteroidetes	Sphingobacteriia	Sphingobacteriales	Chitinophagaceae		Unassigned
ASV265	50	0	0	10	0	0	0	0	0	0	0	0	0	0	0	60	Bacteria{superkingdom}(94);Chloroflexi{phylum}(94);Chloroflexia{class}(94);Kallotenuales{order}(94);Kallotenuaceae{family}(94);Kallotenue{genus}(94);uncultured_bacterium{species}(94)	Bacteria	Chloroflexi	Chloroflexia	Kallotenuales	Kallotenuaceae	Kallotenue	uncultured_bacterium
ASV266	0	17	0	0	0	0	0	0	0	24	0	39	18	0	0	98	Bacteria{superkingdom}(98);Proteobacteria{phylum}(98);Alphaproteobacteria{class}(98);Sphingomonadales{order}(98);Sphingomonadaceae{family}(98);Novosphingobium{genus}(98);Unassigned{species}(0)	Bacteria	Proteobacteria	Alphaproteobacteria	Sphingomonadales	Sphingomonadaceae	Novosphingobium	Unassigned
ASV267	154	650	266	334	642	0	57	55	11	247	0	40	0	66	0	2522	Bacteria{superkingdom}(100);Chloroflexi{phylum}(100);Thermomicrobia{class}(100);Sphaerobacterales{order}(100);Sphaerobacteraceae{family}(100);{genus}(100);Unassigned{species}(0)	Bacteria	Chloroflexi	Thermomicrobia	Sphaerobacterales	Sphaerobacteraceae		Unassigned
ASV268	126	120	63	42	53	224	361	72	57	176	38	137	3	13	78	1563	Bacteria{superkingdom}(84);Chloroflexi{phylum}(84);Chloroflexia{class}(84);{order}(84);{family}(84);{genus}(84);uncultured_bacterium{species}(84)	Bacteria	Chloroflexi	Chloroflexia				uncultured_bacterium
ASV269	90	95	225	39	1959	0	27	23	0	0	0	0	0	0	0	2458	Bacteria{superkingdom}(100);Bacteroidetes{phylum}(100);Sphingobacteriia{class}(100);Sphingobacteriales{order}(100);Chitinophagaceae{family}(100);Unassigned{genus}(0);Unassigned{species}(0)	Bacteria	Bacteroidetes	Sphingobacteriia	Sphingobacteriales	Chitinophagaceae	Unassigned	Unassigned
ASV270	77	0	0	164	181	237	781	523	137	360	121	110	0	0	84	2775	Bacteria{superkingdom}(100);Acidobacteria{phylum}(100);Acidobacteria_Gp4{class}(100);{order}(100);{family}(100);Gp4{genus}(100);Unassigned{species}(0)	Bacteria	Acidobacteria	Acidobacteria_Gp4			Gp4	Unassigned
ASV271	70	470	29	241	140	0	100	0	0	66	0	97	0	82	0	1295	Bacteria{superkingdom}(100);Acidobacteria{phylum}(100);Acidobacteria_Gp6{class}(100);{order}(100);{family}(100);Gp6{genus}(100);Unassigned{species}(0)	Bacteria	Acidobacteria	Acidobacteria_Gp6			Gp6	Unassigned
ASV272	86	39	58	179	195	141	208	108	208	678	69	113	373	114	1103	3672	Bacteria{superkingdom}(93);Proteobacteria{phylum}(93);Betaproteobacteria{class}(93);Burkholderiales{order}(93);Comamonadaceae{family}(93);Ramlibacter{genus}(93);Unassigned{species}(0)	Bacteria	Proteobacteria	Betaproteobacteria	Burkholderiales	Comamonadaceae	Ramlibacter	Unassigned
ASV273	184	0	359	208	1807	21	38	0	122	181	59	239	31	97	98	3444	Bacteria{superkingdom}(100);Actinobacteria{phylum}(100);Actinobacteria{class}(100);Unassigned{order}(0);Unassigned{family}(0);Unassigned{genus}(0);Unassigned{species}(0)	Bacteria	Actinobacteria	Actinobacteria	Unassigned	Unassigned	Unassigned	Unassigned
ASV274	31	0	66	328	222	0	0	0	31	0	0	0	0	0	0	678	Bacteria{superkingdom}(100);Bacteroidetes{phylum}(100);Sphingobacteriia{class}(100);Sphingobacteriales{order}(100);Chitinophagaceae{family}(100);Unassigned{genus}(0);Unassigned{species}(0)	Bacteria	Bacteroidetes	Sphingobacteriia	Sphingobacteriales	Chitinophagaceae	Unassigned	Unassigned
ASV275	199	0	109	102	172	57	223	135	126	76	81	8	0	104	34	1426	Bacteria{superkingdom}(85);{phylum}(85);{class}(85);{order}(85);{family}(85);{genus}(85);uncultured_Syntrophobacter_sp.{species}(85)	Bacteria						uncultured_Syntrophobacter_sp.
ASV276	71	0	19	27	56	0	0	72	38	91	0	230	203	98	97	1002	Bacteria{superkingdom}(95);Actinobacteria{phylum}(95);Actinobacteria{class}(95);Actinomycetales{order}(95);Geodermatophilaceae{family}(95);Geodermatophilus{genus}(95);Unassigned{species}(0)	Bacteria	Actinobacteria	Actinobacteria	Actinomycetales	Geodermatophilaceae	Geodermatophilus	Unassigned
ASV278	80	122	0	216	189	1011	697	190	188	807	0	0	0	43	104	3647	Bacteria{superkingdom}(100);Acidobacteria{phylum}(100);Acidobacteria_Gp4{class}(100);{order}(100);{family}(100);Gp4{genus}(100);Unassigned{species}(0)	Bacteria	Acidobacteria	Acidobacteria_Gp4			Gp4	Unassigned
ASV279	65	0	34	48	114	87	67	219	319	380	159	412	2180	72	277	4433	Bacteria{superkingdom}(100);{phylum}(100);{class}(100);{order}(100);{family}(100);{genus}(100);uncultured_Actinomyces_sp.{species}(100)	Bacteria						uncultured_Actinomyces_sp.
ASV280	231	64	128	75	92	177	174	16	160	104	136	36	157	105	203	1858	Bacteria{superkingdom}(100);Chloroflexi{phylum}(100);Caldilineae{class}(100);Caldilineales{order}(100);Caldilineaceae{family}(100);Litorilinea{genus}(100);uncultured_Litorilinea_sp.{species}(100)	Bacteria	Chloroflexi	Caldilineae	Caldilineales	Caldilineaceae	Litorilinea	uncultured_Litorilinea_sp.
ASV281	62	43	308	2427	3136	0	0	304	320	0	0	0	0	0	0	6600	Bacteria{superkingdom}(81);Bacteroidetes{phylum}(81);Sphingobacteriia{class}(81);Sphingobacteriales{order}(81);Chitinophagaceae{family}(81);Niastella{genus}(81);Unassigned{species}(0)	Bacteria	Bacteroidetes	Sphingobacteriia	Sphingobacteriales	Chitinophagaceae	Niastella	Unassigned
ASV282	38	0	0	3	0	0	0	0	0	0	0	0	0	0	0	41	Bacteria{superkingdom}(94);Acidobacteria{phylum}(94);Acidobacteria_Gp10{class}(94);{order}(94);{family}(94);Gp10{genus}(94);uncultured_soil_bacterium{species}(94)	Bacteria	Acidobacteria	Acidobacteria_Gp10			Gp10	uncultured_soil_bacterium
ASV283	215	0	236	1341	2105	94	43	13	0	0	293	80	21	84	129	4654	Bacteria{superkingdom}(80);Bacteroidetes{phylum}(80);Sphingobacteriia{class}(80);Sphingobacteriales{order}(80);Chitinophagaceae{family}(80);Chitinophaga{genus}(80);uncultured_bacterium{species}(80)	Bacteria	Bacteroidetes	Sphingobacteriia	Sphingobacteriales	Chitinophagaceae	Chitinophaga	uncultured_bacterium
ASV285	148	1328	52	297	175	333	237	289	139	154	410	679	0	412	529	5182	Bacteria{superkingdom}(100);Chloroflexi{phylum}(100);Anaerolineae{class}(100);Anaerolineales{order}(100);Anaerolineaceae{family}(100);{genus}(100);uncultured_soil_bacterium{species}(100)	Bacteria	Chloroflexi	Anaerolineae	Anaerolineales	Anaerolineaceae		uncultured_soil_bacterium
ASV286	308	0	377	864	1945	91	38	23	32	0	204	0	0	0	172	4054	Bacteria{superkingdom}(100);Chloroflexi{phylum}(100);Thermomicrobia{class}(100);Unassigned{order}(0);Unassigned{family}(0);Unassigned{genus}(0);Unassigned{species}(0)	Bacteria	Chloroflexi	Thermomicrobia	Unassigned	Unassigned	Unassigned	Unassigned
ASV287	0	0	0	0	0	0	0	0	0	55	0	0	0	50	0	105	Bacteria{superkingdom}(100);Actinobacteria{phylum}(100);Actinobacteria{class}(100);Actinomycetales{order}(100);Micromonosporaceae{family}(100);Unassigned{genus}(0);Unassigned{species}(0)	Bacteria	Actinobacteria	Actinobacteria	Actinomycetales	Micromonosporaceae	Unassigned	Unassigned
ASV288	0	0	0	0	0	0	0	65	35	89	44	150	313	140	96	932	Bacteria{superkingdom}(100);Proteobacteria{phylum}(100);Betaproteobacteria{class}(100);{order}(100);{family}(100);{genus}(100);Unassigned{species}(0)	Bacteria	Proteobacteria	Betaproteobacteria				Unassigned
ASV289	67	0	74	517	539	49	0	0	74	0	117	0	0	0	45	1482	Bacteria{superkingdom}(100);Acidobacteria{phylum}(100);Acidobacteria_Gp6{class}(100);{order}(100);{family}(100);Gp6{genus}(100);Unassigned{species}(0)	Bacteria	Acidobacteria	Acidobacteria_Gp6			Gp6	Unassigned
ASV290	0	145	17	0	0	65	66	43	57	106	47	64	165	124	83	982	Bacteria{superkingdom}(100);Proteobacteria{phylum}(100);Betaproteobacteria{class}(100);{order}(100);{family}(100);{genus}(100);Unassigned{species}(0)	Bacteria	Proteobacteria	Betaproteobacteria				Unassigned
ASV292	228	0	0	0	0	81	59	32	0	545	0	0	0	0	0	945	Bacteria{superkingdom}(100);Chloroflexi{phylum}(100);Chloroflexia{class}(100);{order}(100);{family}(100);{genus}(100);uncultured_Herpetosiphon_sp.{species}(100)	Bacteria	Chloroflexi	Chloroflexia				uncultured_Herpetosiphon_sp.
ASV293	139	185	173	160	228	55	107	47	106	212	7	0	9	38	34	1500	Bacteria{superkingdom}(100);Chloroflexi{phylum}(100);Chloroflexia{class}(100);{order}(100);{family}(100);{genus}(100);uncultured_soil_bacterium{species}(100)	Bacteria	Chloroflexi	Chloroflexia				uncultured_soil_bacterium
ASV294	0	0	0	0	0	0	0	0	21	13	0	53	0	21	0	108	Bacteria{superkingdom}(100);Chloroflexi{phylum}(100);Thermomicrobia{class}(100);Sphaerobacterales{order}(100);Sphaerobacteraceae{family}(100);{genus}(100);uncultured_Thermomicrobium_sp.{species}(100)	Bacteria	Chloroflexi	Thermomicrobia	Sphaerobacterales	Sphaerobacteraceae		uncultured_Thermomicrobium_sp.
ASV295	41	0	0	110	0	0	0	0	228	0	0	33	113	126	0	651	Bacteria{superkingdom}(100);Acidobacteria{phylum}(100);Acidobacteria_Gp7{class}(100);{order}(100);{family}(100);Gp7{genus}(100);Unassigned{species}(0)	Bacteria	Acidobacteria	Acidobacteria_Gp7			Gp7	Unassigned
ASV296	82	64	119	62	183	35	77	42	20	166	11	54	86	80	36	1117	Bacteria{superkingdom}(100);Proteobacteria{phylum}(100);Alphaproteobacteria{class}(100);Rhizobiales{order}(100);Methylobacteriaceae{family}(100);Microvirga{genus}(100);Unassigned{species}(0)	Bacteria	Proteobacteria	Alphaproteobacteria	Rhizobiales	Methylobacteriaceae	Microvirga	Unassigned
ASV297	208	0	171	181	1275	0	107	39	0	0	0	5	24	18	57	2085	Bacteria{superkingdom}(98);Bacteroidetes{phylum}(98);Cytophagia{class}(98);Cytophagales{order}(98);Cytophagaceae{family}(98);Dyadobacter{genus}(98);Dyadobacter_fermentans{species}(98)	Bacteria	Bacteroidetes	Cytophagia	Cytophagales	Cytophagaceae	Dyadobacter	Dyadobacter_fermentans
ASV298	100	75	120	149	1226	73	77	103	135	125	137	570	319	375	201	3785	Bacteria{superkingdom}(84);Acidobacteria{phylum}(84);Acidobacteria_Gp3{class}(84);{order}(84);{family}(84);{genus}(84);uncultured_Bacillus_sp.{species}(84)	Bacteria	Acidobacteria	Acidobacteria_Gp3				uncultured_Bacillus_sp.
ASV299	0	221	0	0	0	0	22	0	0	15	0	0	0	0	0	258	Bacteria{superkingdom}(95);Actinobacteria{phylum}(95);Actinobacteria{class}(95);Actinomycetales{order}(95);Unassigned{family}(0);Unassigned{genus}(0);Unassigned{species}(0)	Bacteria	Actinobacteria	Actinobacteria	Actinomycetales	Unassigned	Unassigned	Unassigned
ASV300	249	435	147	0	134	0	0	0	0	0	0	0	0	0	0	965	Bacteria{superkingdom}(100);Actinobacteria{phylum}(100);Actinobacteria{class}(100);Actinomycetales{order}(100);Pseudonocardiaceae{family}(100);Unassigned{genus}(0);Unassigned{species}(0)	Bacteria	Actinobacteria	Actinobacteria	Actinomycetales	Pseudonocardiaceae	Unassigned	Unassigned
ASV301	12	223	0	16	0	29	0	37	32	444	83	134	328	266	870	2474	Bacteria{superkingdom}(90);Proteobacteria{phylum}(90);Alphaproteobacteria{class}(90);Sphingomonadales{order}(90);Sphingomonadaceae{family}(90);Novosphingobium{genus}(90);Unassigned{species}(0)	Bacteria	Proteobacteria	Alphaproteobacteria	Sphingomonadales	Sphingomonadaceae	Novosphingobium	Unassigned
ASV303	0	0	0	86	0	46	33	136	0	807	0	1041	45	409	0	2603	Bacteria{superkingdom}(98);Actinobacteria{phylum}(98);Actinobacteria{class}(98);Actinomycetales{order}(98);Streptomycetaceae{family}(98);Streptomyces{genus}(98);Unassigned{species}(0)	Bacteria	Actinobacteria	Actinobacteria	Actinomycetales	Streptomycetaceae	Streptomyces	Unassigned
ASV304	23	25	97	1229	1586	0	45	191	54	0	0	0	0	0	0	3250	Bacteria{superkingdom}(81);Bacteroidetes{phylum}(81);Sphingobacteriia{class}(81);Sphingobacteriales{order}(81);Chitinophagaceae{family}(81);{genus}(81);uncultured_Cytophaga_sp.{species}(81)	Bacteria	Bacteroidetes	Sphingobacteriia	Sphingobacteriales	Chitinophagaceae		uncultured_Cytophaga_sp.
ASV305	77	171	63	108	626	594	424	188	124	533	150	17	34	15	117	3241	Bacteria{superkingdom}(100);Acidobacteria{phylum}(100);Acidobacteria_Gp6{class}(100);{order}(100);{family}(100);Gp6{genus}(100);Unassigned{species}(0)	Bacteria	Acidobacteria	Acidobacteria_Gp6			Gp6	Unassigned
ASV306	306	953	71	42	189	1356	1021	83	60	349	0	0	0	0	0	4430	Bacteria{superkingdom}(99);Chloroflexi{phylum}(99);Unassigned{class}(0);Unassigned{order}(0);Unassigned{family}(0);Unassigned{genus}(0);Unassigned{species}(0)	Bacteria	Chloroflexi	Unassigned	Unassigned	Unassigned	Unassigned	Unassigned
ASV307	0	0	12	0	0	0	0	0	0	0	0	102	144	333	90	681	Bacteria{superkingdom}(100);Actinobacteria{phylum}(100);Actinobacteria{class}(100);Actinomycetales{order}(100);Microbacteriaceae{family}(100);Unassigned{genus}(0);Unassigned{species}(0)	Bacteria	Actinobacteria	Actinobacteria	Actinomycetales	Microbacteriaceae	Unassigned	Unassigned
ASV308	50	64	0	130	702	220	535	184	55	126	0	79	44	65	0	2254	Bacteria{superkingdom}(82);Bacteroidetes{phylum}(82);Sphingobacteriia{class}(82);Sphingobacteriales{order}(82);Chitinophagaceae{family}(82);{genus}(82);Unassigned{species}(0)	Bacteria	Bacteroidetes	Sphingobacteriia	Sphingobacteriales	Chitinophagaceae		Unassigned
ASV310	0	0	0	0	0	0	0	0	55	0	0	95	0	0	0	150	Bacteria{superkingdom}(100);Chloroflexi{phylum}(100);Chloroflexia{class}(100);Kallotenuales{order}(100);Kallotenuaceae{family}(100);Kallotenue{genus}(100);Unassigned{species}(0)	Bacteria	Chloroflexi	Chloroflexia	Kallotenuales	Kallotenuaceae	Kallotenue	Unassigned
ASV311	15	91	129	0	204	499	597	363	85	1949	547	416	480	150	625	6150	Bacteria{superkingdom}(100);Proteobacteria{phylum}(100);Alphaproteobacteria{class}(100);Rhodobacterales{order}(100);Rhodobacteraceae{family}(100);Rubellimicrobium{genus}(100);Unassigned{species}(0)	Bacteria	Proteobacteria	Alphaproteobacteria	Rhodobacterales	Rhodobacteraceae	Rubellimicrobium	Unassigned
ASV312	237	71	73	140	181	77	257	60	367	46	27	25	0	22	27	1610	Bacteria{superkingdom}(99);Proteobacteria{phylum}(99);Deltaproteobacteria{class}(99);{order}(99);{family}(99);{genus}(99);Unassigned{species}(0)	Bacteria	Proteobacteria	Deltaproteobacteria				Unassigned
ASV313	0	0	0	254	266	0	0	0	0	0	94	0	0	0	0	614	Bacteria{superkingdom}(100);Candidatus_Saccharibacteria{phylum}(100);{class}(100);{order}(100);{family}(100);Saccharibacteria_genera_incertae_sedis{genus}(100);Unassigned{species}(0)	Bacteria	Candidatus_Saccharibacteria				Saccharibacteria_genera_incertae_sedis	Unassigned
ASV314	0	0	0	0	0	19	0	0	0	104	0	0	0	0	0	123	Bacteria{superkingdom}(100);Actinobacteria{phylum}(100);Actinobacteria{class}(100);Solirubrobacterales{order}(100);Unassigned{family}(0);Unassigned{genus}(0);Unassigned{species}(0)	Bacteria	Actinobacteria	Actinobacteria	Solirubrobacterales	Unassigned	Unassigned	Unassigned
ASV315	0	0	0	0	0	0	0	0	0	0	0	30	0	23	0	53	Bacteria{superkingdom}(85);Bacteroidetes{phylum}(85);Cytophagia{class}(85);Cytophagales{order}(85);Cytophagaceae{family}(85);Adhaeribacter{genus}(85);uncultured_bacterium{species}(85)	Bacteria	Bacteroidetes	Cytophagia	Cytophagales	Cytophagaceae	Adhaeribacter	uncultured_bacterium
ASV316	86	0	112	1160	287	0	0	0	0	0	21	44	0	38	0	1748	Bacteria{superkingdom}(100);Actinobacteria{phylum}(100);Actinobacteria{class}(100);Actinomycetales{order}(100);Nocardioidaceae{family}(100);Kribbella{genus}(100);Unassigned{species}(0)	Bacteria	Actinobacteria	Actinobacteria	Actinomycetales	Nocardioidaceae	Kribbella	Unassigned
ASV317	53	102	233	119	348	0	0	0	0	0	145	53	50	0	19	1122	Bacteria{superkingdom}(100);Verrucomicrobia{phylum}(100);Opitutae{class}(100);Opitutales{order}(100);Opitutaceae{family}(100);Opitutus{genus}(100);Unassigned{species}(0)	Bacteria	Verrucomicrobia	Opitutae	Opitutales	Opitutaceae	Opitutus	Unassigned
ASV318	31	0	0	68	0	23	37	27	24	43	0	46	51	24	16	390	Bacteria{superkingdom}(98);Acidobacteria{phylum}(98);Acidobacteria_Gp4{class}(98);{order}(98);{family}(98);Aridibacter{genus}(98);uncultured_organism{species}(98)	Bacteria	Acidobacteria	Acidobacteria_Gp4			Aridibacter	uncultured_organism
ASV319	19	39	27	8	27	0	56	41	20	551	0	27	36	33	33	917	Bacteria{superkingdom}(97);Proteobacteria{phylum}(97);Betaproteobacteria{class}(97);Burkholderiales{order}(97);Oxalobacteraceae{family}(97);Massilia{genus}(97);Unassigned{species}(0)	Bacteria	Proteobacteria	Betaproteobacteria	Burkholderiales	Oxalobacteraceae	Massilia	Unassigned
ASV320	0	193	21	0	0	0	0	0	0	35	190	111	11	90	0	651	Bacteria{superkingdom}(100);Acidobacteria{phylum}(100);Acidobacteria_Gp10{class}(100);{order}(100);{family}(100);Gp10{genus}(100);Unassigned{species}(0)	Bacteria	Acidobacteria	Acidobacteria_Gp10			Gp10	Unassigned
ASV321	0	157	0	400	439	91	0	0	74	68	155	0	320	0	50	1754	Bacteria{superkingdom}(100);Proteobacteria{phylum}(100);Alphaproteobacteria{class}(100);Rhodospirillales{order}(100);Rhodospirillaceae{family}(100);Dongia{genus}(100);Unassigned{species}(0)	Bacteria	Proteobacteria	Alphaproteobacteria	Rhodospirillales	Rhodospirillaceae	Dongia	Unassigned
ASV322	0	0	0	138	0	0	0	0	0	0	0	0	0	0	0	138	Bacteria{superkingdom}(90);Proteobacteria{phylum}(90);Gammaproteobacteria{class}(90);Xanthomonadales{order}(90);Sinobacteraceae{family}(90);Steroidobacter{genus}(90);uncultured_gamma_proteobacterium{species}(90)	Bacteria	Proteobacteria	Gammaproteobacteria	Xanthomonadales	Sinobacteraceae	Steroidobacter	uncultured_gamma_proteobacterium
ASV323	0	0	0	0	0	0	0	95	0	55	0	0	0	58	0	208	Bacteria{superkingdom}(83);Actinobacteria{phylum}(83);Actinobacteria{class}(83);Rubrobacterales{order}(83);Rubrobacteraceae{family}(83);Rubrobacter{genus}(83);uncultured_bacterium{species}(83)	Bacteria	Actinobacteria	Actinobacteria	Rubrobacterales	Rubrobacteraceae	Rubrobacter	uncultured_bacterium
ASV324	0	237	2	82	19	1	19	67	19	159	0	15	60	24	6	710	Bacteria{superkingdom}(99);Chloroflexi{phylum}(99);Thermomicrobia{class}(99);Sphaerobacterales{order}(99);Sphaerobacteraceae{family}(99);Unassigned{genus}(0);Unassigned{species}(0)	Bacteria	Chloroflexi	Thermomicrobia	Sphaerobacterales	Sphaerobacteraceae	Unassigned	Unassigned
ASV325	138	213	45	593	557	0	19	63	22	0	0	0	0	0	25	1675	Bacteria{superkingdom}(97);Proteobacteria{phylum}(97);Alphaproteobacteria{class}(97);Rhodospirillales{order}(97);Rhodospirillaceae{family}(97);Dongia{genus}(97);Unassigned{species}(0)	Bacteria	Proteobacteria	Alphaproteobacteria	Rhodospirillales	Rhodospirillaceae	Dongia	Unassigned
ASV326	134	302	38	71	0	182	175	124	65	86	0	93	66	134	65	1535	Bacteria{superkingdom}(100);Actinobacteria{phylum}(100);Actinobacteria{class}(100);Gaiellales{order}(100);Gaiellaceae{family}(100);Gaiella{genus}(100);Unassigned{species}(0)	Bacteria	Actinobacteria	Actinobacteria	Gaiellales	Gaiellaceae	Gaiella	Unassigned
ASV327	127	140	152	183	86	0	38	0	0	109	19	30	0	0	0	884	Bacteria{superkingdom}(85);Actinobacteria{phylum}(85);Actinobacteria{class}(85);Rubrobacterales{order}(85);Rubrobacteraceae{family}(85);Rubrobacter{genus}(85);uncultured_bacterium{species}(85)	Bacteria	Actinobacteria	Actinobacteria	Rubrobacterales	Rubrobacteraceae	Rubrobacter	uncultured_bacterium
ASV328	0	243	0	0	0	0	0	107	0	0	0	0	0	0	0	350	Bacteria{superkingdom}(100);Acidobacteria{phylum}(100);Acidobacteria_Gp4{class}(100);{order}(100);{family}(100);Gp4{genus}(100);Unassigned{species}(0)	Bacteria	Acidobacteria	Acidobacteria_Gp4			Gp4	Unassigned
ASV329	0	0	0	174	0	190	0	0	74	0	0	66	0	0	0	504	Bacteria{superkingdom}(100);Proteobacteria{phylum}(100);Gammaproteobacteria{class}(100);Xanthomonadales{order}(100);Sinobacteraceae{family}(100);Steroidobacter{genus}(100);Unassigned{species}(0)	Bacteria	Proteobacteria	Gammaproteobacteria	Xanthomonadales	Sinobacteraceae	Steroidobacter	Unassigned
ASV330	0	0	0	46	70	139	74	210	178	307	212	106	626	75	127	2170	Bacteria{superkingdom}(100);Proteobacteria{phylum}(100);Betaproteobacteria{class}(100);Burkholderiales{order}(100);Comamonadaceae{family}(100);Unassigned{genus}(0);Unassigned{species}(0)	Bacteria	Proteobacteria	Betaproteobacteria	Burkholderiales	Comamonadaceae	Unassigned	Unassigned
ASV331	159	417	151	23	317	371	479	167	83	179	207	11	0	217	55	2836	Bacteria{superkingdom}(80);Chloroflexi{phylum}(80);Thermomicrobia{class}(80);Sphaerobacterales{order}(80);Sphaerobacteraceae{family}(80);Nitrolancea{genus}(80);Unassigned{species}(0)	Bacteria	Chloroflexi	Thermomicrobia	Sphaerobacterales	Sphaerobacteraceae	Nitrolancea	Unassigned
ASV334	112	489	149	170	97	0	48	67	0	78	0	78	35	0	0	1323	Bacteria{superkingdom}(100);Actinobacteria{phylum}(100);Actinobacteria{class}(100);Solirubrobacterales{order}(100);Solirubrobacteraceae{family}(100);Solirubrobacter{genus}(100);Unassigned{species}(0)	Bacteria	Actinobacteria	Actinobacteria	Solirubrobacterales	Solirubrobacteraceae	Solirubrobacter	Unassigned
ASV335	78	314	41	177	338	95	107	41	97	109	155	91	109	89	137	1978	Bacteria{superkingdom}(96);Proteobacteria{phylum}(96);Alphaproteobacteria{class}(96);Rhizobiales{order}(96);{family}(96);{genus}(96);Unassigned{species}(0)	Bacteria	Proteobacteria	Alphaproteobacteria	Rhizobiales			Unassigned
ASV336	101	93	58	314	75	0	0	0	0	0	89	0	0	0	0	730	Bacteria{superkingdom}(100);Proteobacteria{phylum}(100);Betaproteobacteria{class}(100);Burkholderiales{order}(100);Oxalobacteraceae{family}(100);Unassigned{genus}(0);Unassigned{species}(0)	Bacteria	Proteobacteria	Betaproteobacteria	Burkholderiales	Oxalobacteraceae	Unassigned	Unassigned
ASV337	22	0	14	557	452	0	0	14	5	18	0	19	0	10	0	1111	Bacteria{superkingdom}(99);Proteobacteria{phylum}(99);Gammaproteobacteria{class}(99);Xanthomonadales{order}(99);Xanthomonadaceae{family}(99);Luteimonas{genus}(99);Unassigned{species}(0)	Bacteria	Proteobacteria	Gammaproteobacteria	Xanthomonadales	Xanthomonadaceae	Luteimonas	Unassigned
ASV338	105	7	47	597	1483	105	51	0	0	51	223	0	0	0	65	2734	Bacteria{superkingdom}(100);Proteobacteria{phylum}(100);Gammaproteobacteria{class}(100);Xanthomonadales{order}(100);Xanthomonadaceae{family}(100);Pseudoxanthomonas{genus}(100);Unassigned{species}(0)	Bacteria	Proteobacteria	Gammaproteobacteria	Xanthomonadales	Xanthomonadaceae	Pseudoxanthomonas	Unassigned
ASV340	30	87	15	30	149	0	12	35	30	0	15	98	138	82	0	721	Bacteria{superkingdom}(100);Proteobacteria{phylum}(100);Gammaproteobacteria{class}(100);{order}(100);{family}(100);{genus}(100);Unassigned{species}(0)	Bacteria	Proteobacteria	Gammaproteobacteria				Unassigned
ASV341	0	187	13	0	35	72	29	78	59	114	21	71	332	81	72	1164	Bacteria{superkingdom}(100);Proteobacteria{phylum}(100);Alphaproteobacteria{class}(100);Rhodospirillales{order}(100);Rhodospirillaceae{family}(100);Constrictibacter{genus}(100);uncultured_bacterium{species}(100)	Bacteria	Proteobacteria	Alphaproteobacteria	Rhodospirillales	Rhodospirillaceae	Constrictibacter	uncultured_bacterium
ASV342	105	832	142	77	201	0	37	41	19	0	0	0	0	0	0	1454	Bacteria{superkingdom}(100);Actinobacteria{phylum}(100);Unassigned{class}(0);Unassigned{order}(0);Unassigned{family}(0);Unassigned{genus}(0);Unassigned{species}(0)	Bacteria	Actinobacteria	Unassigned	Unassigned	Unassigned	Unassigned	Unassigned
ASV343	0	62	0	0	0	51	0	50	132	266	112	1065	1341	58	0	3137	Bacteria{superkingdom}(90);Actinobacteria{phylum}(90);Actinobacteria{class}(90);Acidimicrobiales{order}(90);Acidimicrobineae_incertae_sedis{family}(90);Aciditerrimonas{genus}(90);Unassigned{species}(0)	Bacteria	Actinobacteria	Actinobacteria	Acidimicrobiales	Acidimicrobineae_incertae_sedis	Aciditerrimonas	Unassigned
ASV344	89	0	124	15	269	9	12	0	0	0	0	0	0	0	0	518	Bacteria{superkingdom}(100);Acidobacteria{phylum}(100);Acidobacteria_Gp6{class}(100);{order}(100);{family}(100);Gp6{genus}(100);Unassigned{species}(0)	Bacteria	Acidobacteria	Acidobacteria_Gp6			Gp6	Unassigned
ASV346	0	36	23	21	0	0	0	27	0	34	0	0	28	89	0	258	Bacteria{superkingdom}(99);Actinobacteria{phylum}(99);Actinobacteria{class}(99);Actinomycetales{order}(99);Geodermatophilaceae{family}(99);Geodermatophilus{genus}(99);Unassigned{species}(0)	Bacteria	Actinobacteria	Actinobacteria	Actinomycetales	Geodermatophilaceae	Geodermatophilus	Unassigned
ASV347	111	439	50	114	842	0	26	19	31	51	6	26	22	0	33	1770	Bacteria{superkingdom}(98);Actinobacteria{phylum}(98);Actinobacteria{class}(98);Actinomycetales{order}(98);Nocardioidaceae{family}(98);Aeromicrobium{genus}(98);Unassigned{species}(0)	Bacteria	Actinobacteria	Actinobacteria	Actinomycetales	Nocardioidaceae	Aeromicrobium	Unassigned
ASV348	145	419	111	212	266	49	137	67	171	171	64	35	147	136	72	2202	Bacteria{superkingdom}(89);Actinobacteria{phylum}(89);Actinobacteria{class}(89);Acidimicrobiales{order}(89);Acidimicrobineae_incertae_sedis{family}(89);Aciditerrimonas{genus}(89);uncultured_Acidimicrobiales_bacterium{species}(89)	Bacteria	Actinobacteria	Actinobacteria	Acidimicrobiales	Acidimicrobineae_incertae_sedis	Aciditerrimonas	uncultured_Acidimicrobiales_bacterium
ASV349	0	0	0	0	0	0	0	0	0	0	0	0	17	0	0	17	Bacteria{superkingdom}(100);Acidobacteria{phylum}(100);Acidobacteria_Gp7{class}(100);{order}(100);{family}(100);Gp7{genus}(100);Unassigned{species}(0)	Bacteria	Acidobacteria	Acidobacteria_Gp7			Gp7	Unassigned
ASV350	18	138	8	75	0	0	0	53	17	78	0	54	13	87	13	554	Bacteria{superkingdom}(96);Actinobacteria{phylum}(96);Actinobacteria{class}(96);Actinomycetales{order}(96);Mycobacteriaceae{family}(96);Mycobacterium{genus}(96);Unassigned{species}(0)	Bacteria	Actinobacteria	Actinobacteria	Actinomycetales	Mycobacteriaceae	Mycobacterium	Unassigned
ASV351	86	126	347	310	810	0	0	0	49	0	67	0	0	0	0	1795	Bacteria{superkingdom}(94);Chloroflexi{phylum}(94);Thermomicrobia{class}(94);Sphaerobacterales{order}(94);Sphaerobacteraceae{family}(94);{genus}(94);Unassigned{species}(0)	Bacteria	Chloroflexi	Thermomicrobia	Sphaerobacterales	Sphaerobacteraceae		Unassigned
ASV353	0	0	0	25	0	0	0	36	23	96	0	101	69	213	40	603	Bacteria{superkingdom}(100);Proteobacteria{phylum}(100);Alphaproteobacteria{class}(100);Rhodospirillales{order}(100);Rhodospirillaceae{family}(100);Skermanella{genus}(100);Unassigned{species}(0)	Bacteria	Proteobacteria	Alphaproteobacteria	Rhodospirillales	Rhodospirillaceae	Skermanella	Unassigned
ASV354	57	114	23	18	45	40	278	180	44	244	7	18	15	135	103	1321	Bacteria{superkingdom}(98);Chloroflexi{phylum}(98);Chloroflexia{class}(98);{order}(98);{family}(98);{genus}(98);uncultured_soil_bacterium{species}(98)	Bacteria	Chloroflexi	Chloroflexia				uncultured_soil_bacterium
ASV355	0	32	0	0	0	21	66	11	21	204	0	0	0	51	13	419	Bacteria{superkingdom}(80);Proteobacteria{phylum}(80);Betaproteobacteria{class}(80);Burkholderiales{order}(80);Burkholderiaceae{family}(80);Lautropia{genus}(80);uncultured_Derxia_sp.{species}(80)	Bacteria	Proteobacteria	Betaproteobacteria	Burkholderiales	Burkholderiaceae	Lautropia	uncultured_Derxia_sp.
ASV356	0	0	0	193	0	0	0	0	0	0	0	0	0	0	0	193	Bacteria{superkingdom}(100);Actinobacteria{phylum}(100);Actinobacteria{class}(100);Actinomycetales{order}(100);Micromonosporaceae{family}(100);Unassigned{genus}(0);Unassigned{species}(0)	Bacteria	Actinobacteria	Actinobacteria	Actinomycetales	Micromonosporaceae	Unassigned	Unassigned
ASV358	0	0	0	277	0	0	0	0	0	109	0	0	0	288	0	674	Bacteria{superkingdom}(100);Actinobacteria{phylum}(100);Actinobacteria{class}(100);Actinomycetales{order}(100);Nocardioidaceae{family}(100);Kribbella{genus}(100);Unassigned{species}(0)	Bacteria	Actinobacteria	Actinobacteria	Actinomycetales	Nocardioidaceae	Kribbella	Unassigned
ASV359	0	108	0	30	0	16	0	14	0	64	32	188	239	234	0	925	Bacteria{superkingdom}(89);Bacteroidetes{phylum}(89);Sphingobacteriia{class}(89);Sphingobacteriales{order}(89);Chitinophagaceae{family}(89);Flavisolibacter{genus}(89);uncultured_Bacteroidetes_bacterium{species}(89)	Bacteria	Bacteroidetes	Sphingobacteriia	Sphingobacteriales	Chitinophagaceae	Flavisolibacter	uncultured_Bacteroidetes_bacterium
ASV360	177	0	171	712	667	28	0	0	64	0	46	26	415	0	90	2396	Bacteria{superkingdom}(96);Proteobacteria{phylum}(96);Alphaproteobacteria{class}(96);Rhizobiales{order}(96);Rhizobiaceae{family}(96);Rhizobium{genus}(96);Unassigned{species}(0)	Bacteria	Proteobacteria	Alphaproteobacteria	Rhizobiales	Rhizobiaceae	Rhizobium	Unassigned
ASV361	0	0	0	0	32	0	0	0	0	0	0	0	0	0	0	32	Bacteria{superkingdom}(82);Acidobacteria{phylum}(82);Acidobacteria_Gp4{class}(82);{order}(82);{family}(82);Blastocatella{genus}(82);Unassigned{species}(0)	Bacteria	Acidobacteria	Acidobacteria_Gp4			Blastocatella	Unassigned
ASV362	84	0	20	55	83	22	35	31	133	88	798	1389	41	301	1763	4843	Bacteria{superkingdom}(93);Actinobacteria{phylum}(93);Actinobacteria{class}(93);Solirubrobacterales{order}(93);Conexibacteraceae{family}(93);Conexibacter{genus}(93);Unassigned{species}(0)	Bacteria	Actinobacteria	Actinobacteria	Solirubrobacterales	Conexibacteraceae	Conexibacter	Unassigned
ASV363	92	32	0	151	0	0	0	88	117	19	0	140	87	51	77	854	Bacteria{superkingdom}(94);Planctomycetes{phylum}(94);Planctomycetia{class}(94);Planctomycetales{order}(94);Planctomycetaceae{family}(94);Pirellula{genus}(94);uncultured_Firmicutes_bacterium{species}(94)	Bacteria	Planctomycetes	Planctomycetia	Planctomycetales	Planctomycetaceae	Pirellula	uncultured_Firmicutes_bacterium
ASV364	0	0	99	0	0	0	0	0	0	0	0	0	0	0	0	99	Bacteria{superkingdom}(100);Acidobacteria{phylum}(100);Acidobacteria_Gp10{class}(100);{order}(100);{family}(100);Gp10{genus}(100);Unassigned{species}(0)	Bacteria	Acidobacteria	Acidobacteria_Gp10			Gp10	Unassigned
ASV366	32	62	0	84	157	0	0	29	14	118	0	27	0	0	0	523	Bacteria{superkingdom}(88);Bacteroidetes{phylum}(88);Cytophagia{class}(88);Cytophagales{order}(88);{family}(88);Chryseolinea{genus}(88);Unassigned{species}(0)	Bacteria	Bacteroidetes	Cytophagia	Cytophagales		Chryseolinea	Unassigned
ASV367	81	106	66	166	134	0	0	0	42	81	15	53	101	21	37	903	Bacteria{superkingdom}(100);Proteobacteria{phylum}(100);Alphaproteobacteria{class}(100);Caulobacterales{order}(100);Caulobacteraceae{family}(100);Phenylobacterium{genus}(100);Unassigned{species}(0)	Bacteria	Proteobacteria	Alphaproteobacteria	Caulobacterales	Caulobacteraceae	Phenylobacterium	Unassigned
ASV368	112	0	175	132	254	120	97	418	502	349	95	0	68	0	126	2448	Bacteria{superkingdom}(99);Proteobacteria{phylum}(99);Betaproteobacteria{class}(99);Burkholderiales{order}(99);Comamonadaceae{family}(99);Unassigned{genus}(0);Unassigned{species}(0)	Bacteria	Proteobacteria	Betaproteobacteria	Burkholderiales	Comamonadaceae	Unassigned	Unassigned
ASV369	0	87	0	0	0	0	0	15	0	53	0	25	27	47	8	262	Bacteria{superkingdom}(96);Proteobacteria{phylum}(96);Alphaproteobacteria{class}(96);Rhizobiales{order}(96);Methylobacteriaceae{family}(96);{genus}(96);uncultured_bacterium{species}(96)	Bacteria	Proteobacteria	Alphaproteobacteria	Rhizobiales	Methylobacteriaceae		uncultured_bacterium
ASV370	0	0	0	0	0	0	0	0	0	38	0	0	0	0	0	38	Bacteria{superkingdom}(100);Actinobacteria{phylum}(100);Actinobacteria{class}(100);Actinomycetales{order}(100);Propionibacteriaceae{family}(100);Friedmanniella{genus}(100);Unassigned{species}(0)	Bacteria	Actinobacteria	Actinobacteria	Actinomycetales	Propionibacteriaceae	Friedmanniella	Unassigned
ASV371	0	743	0	0	0	0	0	0	0	0	0	0	0	0	0	743	Bacteria{superkingdom}(100);Acidobacteria{phylum}(100);Acidobacteria_Gp4{class}(100);{order}(100);{family}(100);Gp4{genus}(100);Unassigned{species}(0)	Bacteria	Acidobacteria	Acidobacteria_Gp4			Gp4	Unassigned
ASV373	151	138	146	41	146	33	122	70	128	305	0	0	0	50	19	1349	Bacteria{superkingdom}(100);Actinobacteria{phylum}(100);Actinobacteria{class}(100);Actinomycetales{order}(100);Intrasporangiaceae{family}(100);Unassigned{genus}(0);Unassigned{species}(0)	Bacteria	Actinobacteria	Actinobacteria	Actinomycetales	Intrasporangiaceae	Unassigned	Unassigned
ASV374	300	47	23	0	415	205	179	309	58	190	62	52	262	129	238	2469	Bacteria{superkingdom}(94);Proteobacteria{phylum}(94);Betaproteobacteria{class}(94);Burkholderiales{order}(94);Comamonadaceae{family}(94);Ramlibacter{genus}(94);Unassigned{species}(0)	Bacteria	Proteobacteria	Betaproteobacteria	Burkholderiales	Comamonadaceae	Ramlibacter	Unassigned
ASV375	0	0	0	99	0	0	48	65	26	48	0	83	18	81	0	468	Bacteria{superkingdom}(95);Acidobacteria{phylum}(95);{class}(95);{order}(95);{family}(95);{genus}(95);uncultured_Geobacter_sp.{species}(95)	Bacteria	Acidobacteria					uncultured_Geobacter_sp.
ASV376	150	0	392	0	186	0	13	0	0	0	0	0	0	0	0	741	Bacteria{superkingdom}(91);{phylum}(91);{class}(91);{order}(91);{family}(91);{genus}(91);uncultured_Micromonospora_sp.{species}(91)	Bacteria						uncultured_Micromonospora_sp.
ASV377	0	140	0	0	0	0	0	40	0	0	0	0	0	0	0	180	Bacteria{superkingdom}(100);Acidobacteria{phylum}(100);Acidobacteria_Gp4{class}(100);{order}(100);{family}(100);Gp4{genus}(100);uncultured_Candidatus_Chloracidobacterium_sp.{species}(100)	Bacteria	Acidobacteria	Acidobacteria_Gp4			Gp4	uncultured_Candidatus_Chloracidobacterium_sp.
ASV379	6	34	4	0	0	0	6	64	0	0	0	50	0	97	0	261	Bacteria{superkingdom}(95);Actinobacteria{phylum}(95);Actinobacteria{class}(95);Actinomycetales{order}(95);Geodermatophilaceae{family}(95);Modestobacter{genus}(95);Unassigned{species}(0)	Bacteria	Actinobacteria	Actinobacteria	Actinomycetales	Geodermatophilaceae	Modestobacter	Unassigned
ASV380	31	0	59	73	293	15	7	0	87	0	112	0	0	0	22	699	Bacteria{superkingdom}(97);Bacteroidetes{phylum}(97);Cytophagia{class}(97);Cytophagales{order}(97);{family}(97);Chryseolinea{genus}(97);uncultured_Bacteroidetes_bacterium{species}(97)	Bacteria	Bacteroidetes	Cytophagia	Cytophagales		Chryseolinea	uncultured_Bacteroidetes_bacterium
ASV381	72	167	0	343	146	14	22	83	41	174	33	167	250	40	23	1575	Bacteria{superkingdom}(90);Bacteroidetes{phylum}(90);Cytophagia{class}(90);Cytophagales{order}(90);{family}(90);Ohtaekwangia{genus}(90);uncultured_Sphingobacteriales_bacterium{species}(90)	Bacteria	Bacteroidetes	Cytophagia	Cytophagales		Ohtaekwangia	uncultured_Sphingobacteriales_bacterium
ASV382	0	5	5	285	114	4	4	23	23	0	6	7	5	37	3	521	Bacteria{superkingdom}(100);Proteobacteria{phylum}(100);Gammaproteobacteria{class}(100);Xanthomonadales{order}(100);Sinobacteraceae{family}(100);Steroidobacter{genus}(100);Unassigned{species}(0)	Bacteria	Proteobacteria	Gammaproteobacteria	Xanthomonadales	Sinobacteraceae	Steroidobacter	Unassigned
ASV383	0	0	0	0	0	0	0	0	0	66	0	114	35	32	0	247	Bacteria{superkingdom}(81);Actinobacteria{phylum}(81);Actinobacteria{class}(81);Solirubrobacterales{order}(81);Conexibacteraceae{family}(81);Conexibacter{genus}(81);uncultured_bacterium{species}(81)	Bacteria	Actinobacteria	Actinobacteria	Solirubrobacterales	Conexibacteraceae	Conexibacter	uncultured_bacterium
ASV384	0	0	11	71	92	77	0	816	434	64	79	50	1296	29	0	3019	Bacteria{superkingdom}(100);Bacteroidetes{phylum}(100);Sphingobacteriia{class}(100);Sphingobacteriales{order}(100);Chitinophagaceae{family}(100);Unassigned{genus}(0);Unassigned{species}(0)	Bacteria	Bacteroidetes	Sphingobacteriia	Sphingobacteriales	Chitinophagaceae	Unassigned	Unassigned
ASV385	0	0	10	20	146	0	0	0	0	0	0	84	47	33	0	340	Bacteria{superkingdom}(100);Planctomycetes{phylum}(100);Planctomycetia{class}(100);Planctomycetales{order}(100);Planctomycetaceae{family}(100);Pirellula{genus}(100);uncultured_soil_bacterium_PBS-81{species}(100)	Bacteria	Planctomycetes	Planctomycetia	Planctomycetales	Planctomycetaceae	Pirellula	uncultured_soil_bacterium_PBS-81
ASV386	0	79	0	0	0	0	0	34	0	22	0	65	11	0	10	221	Bacteria{superkingdom}(99);Proteobacteria{phylum}(99);Deltaproteobacteria{class}(99);Myxococcales{order}(99);Polyangiaceae{family}(99);{genus}(99);Unassigned{species}(0)	Bacteria	Proteobacteria	Deltaproteobacteria	Myxococcales	Polyangiaceae		Unassigned
ASV387	28	0	56	239	78	84	145	102	22	83	0	0	68	66	44	1015	Bacteria{superkingdom}(99);Gemmatimonadetes{phylum}(99);Gemmatimonadetes{class}(99);Gemmatimonadales{order}(99);Gemmatimonadaceae{family}(99);Gemmatimonas{genus}(99);Unassigned{species}(0)	Bacteria	Gemmatimonadetes	Gemmatimonadetes	Gemmatimonadales	Gemmatimonadaceae	Gemmatimonas	Unassigned
ASV388	6	0	0	0	0	0	0	8	0	43	72	306	29	76	14	554	Bacteria{superkingdom}(100);Actinobacteria{phylum}(100);Actinobacteria{class}(100);Actinomycetales{order}(100);Pseudonocardiaceae{family}(100);Saccharothrix{genus}(100);Unassigned{species}(0)	Bacteria	Actinobacteria	Actinobacteria	Actinomycetales	Pseudonocardiaceae	Saccharothrix	Unassigned
ASV389	124	0	71	78	731	0	0	0	109	0	0	0	0	0	0	1113	Bacteria{superkingdom}(87);Proteobacteria{phylum}(87);Deltaproteobacteria{class}(87);{order}(87);{family}(87);{genus}(87);uncultured_Acidobacteriales_bacterium{species}(87)	Bacteria	Proteobacteria	Deltaproteobacteria				uncultured_Acidobacteriales_bacterium
ASV390	0	0	81	212	219	0	0	0	0	0	1983	102	0	120	0	2717	Bacteria{superkingdom}(100);Acidobacteria{phylum}(100);Acidobacteria_Gp7{class}(100);{order}(100);{family}(100);Gp7{genus}(100);Unassigned{species}(0)	Bacteria	Acidobacteria	Acidobacteria_Gp7			Gp7	Unassigned
ASV392	0	0	0	0	0	0	13	0	0	0	0	16	0	0	0	29	Bacteria{superkingdom}(100);Bacteroidetes{phylum}(100);Cytophagia{class}(100);Cytophagales{order}(100);Cytophagaceae{family}(100);Dyadobacter{genus}(100);Cytophagaceae_bacterium_PTR3{species}(100)	Bacteria	Bacteroidetes	Cytophagia	Cytophagales	Cytophagaceae	Dyadobacter	Cytophagaceae_bacterium_PTR3
ASV393	24	326	0	0	0	0	0	95	0	160	0	20	0	129	0	754	Bacteria{superkingdom}(100);Actinobacteria{phylum}(100);Actinobacteria{class}(100);Actinomycetales{order}(100);Pseudonocardiaceae{family}(100);Pseudonocardia{genus}(100);Unassigned{species}(0)	Bacteria	Actinobacteria	Actinobacteria	Actinomycetales	Pseudonocardiaceae	Pseudonocardia	Unassigned
ASV394	0	0	0	0	0	0	0	0	0	0	0	25	0	0	0	25	Bacteria{superkingdom}(100);Proteobacteria{phylum}(100);Betaproteobacteria{class}(100);Nitrosomonadales{order}(100);Nitrosomonadaceae{family}(100);Nitrosomonas{genus}(100);Unassigned{species}(0)	Bacteria	Proteobacteria	Betaproteobacteria	Nitrosomonadales	Nitrosomonadaceae	Nitrosomonas	Unassigned
ASV395	100	171	32	104	61	43	59	64	29	130	51	108	71	29	75	1127	Bacteria{superkingdom}(86);Actinobacteria{phylum}(86);Actinobacteria{class}(86);{order}(86);{family}(86);{genus}(86);Unassigned{species}(0)	Bacteria	Actinobacteria	Actinobacteria				Unassigned
ASV396	28	28	23	20	51	20	90	28	37	26	0	0	0	0	0	351	Bacteria{superkingdom}(100);Proteobacteria{phylum}(100);Alphaproteobacteria{class}(100);Unassigned{order}(0);Unassigned{family}(0);Unassigned{genus}(0);Unassigned{species}(0)	Bacteria	Proteobacteria	Alphaproteobacteria	Unassigned	Unassigned	Unassigned	Unassigned
ASV397	78	39	82	390	1423	0	0	0	49	0	0	57	0	38	24	2180	Bacteria{superkingdom}(100);Bacteroidetes{phylum}(100);Sphingobacteriia{class}(100);Sphingobacteriales{order}(100);Chitinophagaceae{family}(100);Flavitalea{genus}(100);Unassigned{species}(0)	Bacteria	Bacteroidetes	Sphingobacteriia	Sphingobacteriales	Chitinophagaceae	Flavitalea	Unassigned
ASV398	31	263	53	46	134	30	97	31	55	0	22	22	85	33	29	931	Bacteria{superkingdom}(92);Chloroflexi{phylum}(92);Dehalococcoidia{class}(92);Dehalococcoidales{order}(92);Dehalococcoidaceae{family}(92);Dehalococcoides{genus}(92);uncultured_soil_bacterium{species}(92)	Bacteria	Chloroflexi	Dehalococcoidia	Dehalococcoidales	Dehalococcoidaceae	Dehalococcoides	uncultured_soil_bacterium
ASV399	57	195	27	287	878	0	19	8	35	81	26	0	0	0	166	1779	Bacteria{superkingdom}(100);Bacteroidetes{phylum}(100);Cytophagia{class}(100);Cytophagales{order}(100);{family}(100);Chryseolinea{genus}(100);Unassigned{species}(0)	Bacteria	Bacteroidetes	Cytophagia	Cytophagales		Chryseolinea	Unassigned
ASV400	0	241	0	0	0	0	0	0	0	569	0	0	0	81	23	914	Bacteria{superkingdom}(100);Proteobacteria{phylum}(100);Alphaproteobacteria{class}(100);Sphingomonadales{order}(100);Sphingomonadaceae{family}(100);Unassigned{genus}(0);Unassigned{species}(0)	Bacteria	Proteobacteria	Alphaproteobacteria	Sphingomonadales	Sphingomonadaceae	Unassigned	Unassigned
ASV401	22	0	0	115	269	0	0	0	18	0	0	0	0	0	0	424	Bacteria{superkingdom}(92);Proteobacteria{phylum}(92);Gammaproteobacteria{class}(92);Xanthomonadales{order}(92);Sinobacteraceae{family}(92);Unassigned{genus}(0);Unassigned{species}(0)	Bacteria	Proteobacteria	Gammaproteobacteria	Xanthomonadales	Sinobacteraceae	Unassigned	Unassigned
ASV402	808	10	0	55	0	0	0	0	0	0	0	0	0	38	0	911	Bacteria{superkingdom}(86);Firmicutes{phylum}(86);Bacilli{class}(86);Bacillales{order}(86);Alicyclobacillaceae{family}(86);Tumebacillus{genus}(86);uncultured_bacterium{species}(86)	Bacteria	Firmicutes	Bacilli	Bacillales	Alicyclobacillaceae	Tumebacillus	uncultured_bacterium
ASV403	0	0	29	155	225	409	0	369	156	286	211	279	99	222	243	2683	Bacteria{superkingdom}(85);Proteobacteria{phylum}(85);Deltaproteobacteria{class}(85);{order}(85);{family}(85);{genus}(85);Alteromonas_sp._Gp-3-7.1{species}(85)	Bacteria	Proteobacteria	Deltaproteobacteria				Alteromonas_sp._Gp-3-7.1
ASV404	0	0	0	0	0	0	0	22	0	18	0	0	0	0	0	40	Bacteria{superkingdom}(98);Acidobacteria{phylum}(98);Acidobacteria_Gp4{class}(98);{order}(98);{family}(98);Gp4{genus}(98);uncultured_actinobacterium{species}(98)	Bacteria	Acidobacteria	Acidobacteria_Gp4			Gp4	uncultured_actinobacterium
ASV405	219	0	166	426	409	83	97	29	0	0	39	0	0	0	0	1468	Bacteria{superkingdom}(99);Firmicutes{phylum}(99);Bacilli{class}(99);Bacillales{order}(99);Paenibacillaceae_1{family}(99);Paenibacillus{genus}(99);Unassigned{species}(0)	Bacteria	Firmicutes	Bacilli	Bacillales	Paenibacillaceae_1	Paenibacillus	Unassigned
ASV406	0	173	0	73	0	119	0	93	127	138	91	142	178	57	79	1270	Bacteria{superkingdom}(94);Verrucomicrobia{phylum}(94);Opitutae{class}(94);Opitutales{order}(94);Opitutaceae{family}(94);Opitutus{genus}(94);uncultured_Opitutaceae_bacterium{species}(94)	Bacteria	Verrucomicrobia	Opitutae	Opitutales	Opitutaceae	Opitutus	uncultured_Opitutaceae_bacterium
ASV408	0	0	0	0	0	0	0	0	0	0	0	19	0	0	0	19	Bacteria{superkingdom}(99);Bacteroidetes{phylum}(99);Cytophagia{class}(99);Cytophagales{order}(99);Cytophagaceae{family}(99);Rufibacter{genus}(99);uncultured_bacterium{species}(99)	Bacteria	Bacteroidetes	Cytophagia	Cytophagales	Cytophagaceae	Rufibacter	uncultured_bacterium
ASV409	0	0	0	0	0	0	0	0	25	188	17	0	0	0	0	230	Bacteria{superkingdom}(81);Proteobacteria{phylum}(81);Betaproteobacteria{class}(81);Burkholderiales{order}(81);Oxalobacteraceae{family}(81);Massilia{genus}(81);Massilia_dura{species}(81)	Bacteria	Proteobacteria	Betaproteobacteria	Burkholderiales	Oxalobacteraceae	Massilia	Massilia_dura
ASV410	0	0	168	0	0	0	0	54	20	0	0	0	0	0	0	242	Bacteria{superkingdom}(100);Acidobacteria{phylum}(100);Acidobacteria_Gp7{class}(100);{order}(100);{family}(100);Gp7{genus}(100);Unassigned{species}(0)	Bacteria	Acidobacteria	Acidobacteria_Gp7			Gp7	Unassigned
ASV411	42	75	61	177	222	66	203	146	54	120	0	0	0	28	39	1233	Bacteria{superkingdom}(100);Gemmatimonadetes{phylum}(100);Gemmatimonadetes{class}(100);Gemmatimonadales{order}(100);Gemmatimonadaceae{family}(100);Gemmatimonas{genus}(100);Unassigned{species}(0)	Bacteria	Gemmatimonadetes	Gemmatimonadetes	Gemmatimonadales	Gemmatimonadaceae	Gemmatimonas	Unassigned
ASV412	75	0	130	291	137	0	0	0	0	0	0	0	0	0	0	633	Bacteria{superkingdom}(100);Proteobacteria{phylum}(100);Alphaproteobacteria{class}(100);Rhizobiales{order}(100);Rhizobiaceae{family}(100);Ensifer{genus}(100);Unassigned{species}(0)	Bacteria	Proteobacteria	Alphaproteobacteria	Rhizobiales	Rhizobiaceae	Ensifer	Unassigned
ASV413	0	0	0	0	0	0	0	0	0	137	0	15	41	110	23	326	Bacteria{superkingdom}(81);Bacteroidetes{phylum}(81);Sphingobacteriia{class}(81);Sphingobacteriales{order}(81);Chitinophagaceae{family}(81);Flavisolibacter{genus}(81);Unassigned{species}(0)	Bacteria	Bacteroidetes	Sphingobacteriia	Sphingobacteriales	Chitinophagaceae	Flavisolibacter	Unassigned
ASV415	0	0	0	0	278	160	181	45	0	266	0	0	0	0	0	930	Bacteria{superkingdom}(100);Proteobacteria{phylum}(100);Betaproteobacteria{class}(100);{order}(100);{family}(100);{genus}(100);Unassigned{species}(0)	Bacteria	Proteobacteria	Betaproteobacteria				Unassigned
ASV416	0	0	0	0	0	0	0	0	0	22	0	0	0	0	0	22	Bacteria{superkingdom}(100);Proteobacteria{phylum}(100);Alphaproteobacteria{class}(100);Rhizobiales{order}(100);{family}(100);{genus}(100);uncultured_endolithic_bacterium{species}(100)	Bacteria	Proteobacteria	Alphaproteobacteria	Rhizobiales			uncultured_endolithic_bacterium
ASV417	0	0	0	0	0	0	0	0	0	0	0	11	0	0	0	11	Bacteria{superkingdom}(100);Bacteroidetes{phylum}(100);Cytophagia{class}(100);Cytophagales{order}(100);Cytophagaceae{family}(100);Adhaeribacter{genus}(100);Unassigned{species}(0)	Bacteria	Bacteroidetes	Cytophagia	Cytophagales	Cytophagaceae	Adhaeribacter	Unassigned
ASV418	0	0	0	62	0	104	174	114	89	101	52	28	97	0	59	880	Bacteria{superkingdom}(98);Acidobacteria{phylum}(98);Acidobacteria_Gp6{class}(98);{order}(98);{family}(98);Gp6{genus}(98);Unassigned{species}(0)	Bacteria	Acidobacteria	Acidobacteria_Gp6			Gp6	Unassigned
ASV420	0	227	0	0	0	68	0	79	0	0	0	0	0	0	0	374	Bacteria{superkingdom}(100);Acidobacteria{phylum}(100);Acidobacteria_Gp6{class}(100);{order}(100);{family}(100);Gp6{genus}(100);Unassigned{species}(0)	Bacteria	Acidobacteria	Acidobacteria_Gp6			Gp6	Unassigned
ASV421	0	0	0	0	0	0	0	0	0	0	0	15	0	0	0	15	Bacteria{superkingdom}(100);Chloroflexi{phylum}(100);Chloroflexia{class}(100);Kallotenuales{order}(100);Kallotenuaceae{family}(100);Kallotenue{genus}(100);uncultured_bacterium{species}(100)	Bacteria	Chloroflexi	Chloroflexia	Kallotenuales	Kallotenuaceae	Kallotenue	uncultured_bacterium
ASV422	19	45	0	0	72	0	0	34	9	51	9	123	48	124	0	534	Bacteria{superkingdom}(97);Proteobacteria{phylum}(97);Alphaproteobacteria{class}(97);Rhizobiales{order}(97);Xanthobacteraceae{family}(97);Pseudolabrys{genus}(97);Unassigned{species}(0)	Bacteria	Proteobacteria	Alphaproteobacteria	Rhizobiales	Xanthobacteraceae	Pseudolabrys	Unassigned
ASV424	0	0	0	0	0	0	0	23	15	66	0	0	40	40	4	188	Bacteria{superkingdom}(100);Chloroflexi{phylum}(100);Caldilineae{class}(100);Caldilineales{order}(100);Caldilineaceae{family}(100);{genus}(100);Unassigned{species}(0)	Bacteria	Chloroflexi	Caldilineae	Caldilineales	Caldilineaceae		Unassigned
ASV425	106	110	105	117	109	141	74	90	177	450	232	235	3	136	250	2335	Bacteria{superkingdom}(82);Proteobacteria{phylum}(82);Alphaproteobacteria{class}(82);Rhodospirillales{order}(82);Rhodospirillaceae{family}(82);{genus}(82);Unassigned{species}(0)	Bacteria	Proteobacteria	Alphaproteobacteria	Rhodospirillales	Rhodospirillaceae		Unassigned
ASV426	113	0	13	0	1962	14	0	0	0	0	0	0	0	0	0	2102	Bacteria{superkingdom}(100);Bacteroidetes{phylum}(100);Cytophagia{class}(100);Cytophagales{order}(100);{family}(100);Ohtaekwangia{genus}(100);Unassigned{species}(0)	Bacteria	Bacteroidetes	Cytophagia	Cytophagales		Ohtaekwangia	Unassigned
ASV427	0	0	0	0	0	0	0	0	0	0	0	46	0	0	0	46	Bacteria{superkingdom}(100);Actinobacteria{phylum}(100);Actinobacteria{class}(100);Actinomycetales{order}(100);Pseudonocardiaceae{family}(100);Actinomycetospora{genus}(100);Unassigned{species}(0)	Bacteria	Actinobacteria	Actinobacteria	Actinomycetales	Pseudonocardiaceae	Actinomycetospora	Unassigned
ASV428	0	227	0	86	0	0	0	64	0	0	0	76	0	0	0	453	Bacteria{superkingdom}(100);Acidobacteria{phylum}(100);Acidobacteria_Gp4{class}(100);{order}(100);{family}(100);Gp4{genus}(100);Unassigned{species}(0)	Bacteria	Acidobacteria	Acidobacteria_Gp4			Gp4	Unassigned
ASV429	39	0	31	193	75	26	213	156	490	116	34	47	94	19	16	1549	Bacteria{superkingdom}(96);{phylum}(96);{class}(96);{order}(96);{family}(96);{genus}(96);Unassigned{species}(0)	Bacteria						Unassigned
ASV430	10	0	126	1478	965	0	0	0	211	15	0	0	0	0	0	2805	Bacteria{superkingdom}(100);Actinobacteria{phylum}(100);Actinobacteria{class}(100);Actinomycetales{order}(100);Streptosporangiaceae{family}(100);Nonomuraea{genus}(100);Unassigned{species}(0)	Bacteria	Actinobacteria	Actinobacteria	Actinomycetales	Streptosporangiaceae	Nonomuraea	Unassigned
ASV431	156	37	106	46	233	33	62	21	60	0	11	8	12	34	5	824	Bacteria{superkingdom}(99);Chloroflexi{phylum}(99);Caldilineae{class}(99);Caldilineales{order}(99);Caldilineaceae{family}(99);{genus}(99);uncultured_Chloroflexi_bacterium{species}(99)	Bacteria	Chloroflexi	Caldilineae	Caldilineales	Caldilineaceae		uncultured_Chloroflexi_bacterium
ASV432	119	93	28	25	0	0	140	0	195	261	441	777	42	195	157	2473	Bacteria{superkingdom}(100);Proteobacteria{phylum}(100);Betaproteobacteria{class}(100);Nitrosomonadales{order}(100);Nitrosomonadaceae{family}(100);Nitrosospira{genus}(100);Unassigned{species}(0)	Bacteria	Proteobacteria	Betaproteobacteria	Nitrosomonadales	Nitrosomonadaceae	Nitrosospira	Unassigned
ASV433	0	0	0	42	0	0	0	41	0	55	0	0	0	0	0	138	Bacteria{superkingdom}(81);Acidobacteria{phylum}(81);Acidobacteria_Gp4{class}(81);{order}(81);{family}(81);Gp4{genus}(81);uncultured_Candidatus_Chloracidobacterium_sp.{species}(81)	Bacteria	Acidobacteria	Acidobacteria_Gp4			Gp4	uncultured_Candidatus_Chloracidobacterium_sp.
ASV434	0	0	0	0	0	0	16	1844	0	261	0	0	0	0	0	2121	Bacteria{superkingdom}(80);Acidobacteria{phylum}(80);Acidobacteria_Gp4{class}(80);{order}(80);{family}(80);Gp4{genus}(80);uncultured_Acidobacteriaceae_bacterium{species}(80)	Bacteria	Acidobacteria	Acidobacteria_Gp4			Gp4	uncultured_Acidobacteriaceae_bacterium
ASV435	13	0	193	487	146	196	12	11	706	63	305	0	0	0	2	2134	Bacteria{superkingdom}(94);Firmicutes{phylum}(94);Bacilli{class}(94);Bacillales{order}(94);Bacillaceae_1{family}(94);Bacillus{genus}(94);Unassigned{species}(0)	Bacteria	Firmicutes	Bacilli	Bacillales	Bacillaceae_1	Bacillus	Unassigned
ASV436	184	0	0	0	117	23	0	0	0	103	0	21	38	55	9	550	Bacteria{superkingdom}(100);Actinobacteria{phylum}(100);Actinobacteria{class}(100);Actinomycetales{order}(100);Microbacteriaceae{family}(100);Microbacterium{genus}(100);Unassigned{species}(0)	Bacteria	Actinobacteria	Actinobacteria	Actinomycetales	Microbacteriaceae	Microbacterium	Unassigned
ASV437	0	30	0	28	19	0	0	0	0	0	0	0	0	0	0	77	Bacteria{superkingdom}(99);Actinobacteria{phylum}(99);Actinobacteria{class}(99);Acidimicrobiales{order}(99);{family}(99);{genus}(99);uncultured_organism{species}(99)	Bacteria	Actinobacteria	Actinobacteria	Acidimicrobiales			uncultured_organism
ASV438	43	49	0	84	45	0	92	129	0	99	0	0	0	0	11	552	Bacteria{superkingdom}(85);Chloroflexi{phylum}(85);Chloroflexia{class}(85);{order}(85);{family}(85);{genus}(85);uncultured_Chloroflexi_bacterium{species}(85)	Bacteria	Chloroflexi	Chloroflexia				uncultured_Chloroflexi_bacterium
ASV439	15	225	0	51	64	11	18	44	27	88	16	123	160	146	58	1046	Bacteria{superkingdom}(100);Acidobacteria{phylum}(100);Acidobacteria_Gp6{class}(100);{order}(100);{family}(100);Gp6{genus}(100);Unassigned{species}(0)	Bacteria	Acidobacteria	Acidobacteria_Gp6			Gp6	Unassigned
ASV440	61	81	78	112	0	60	0	32	96	96	45	422	790	58	144	2075	Bacteria{superkingdom}(100);Actinobacteria{phylum}(100);Actinobacteria{class}(100);Acidimicrobiales{order}(100);Unassigned{family}(0);Unassigned{genus}(0);Unassigned{species}(0)	Bacteria	Actinobacteria	Actinobacteria	Acidimicrobiales	Unassigned	Unassigned	Unassigned
ASV441	454	296	591	0	798	0	0	0	0	0	0	0	0	0	0	2139	Bacteria{superkingdom}(99);Chloroflexi{phylum}(99);{class}(99);{order}(99);{family}(99);{genus}(99);uncultured_Anaerolineae_bacterium{species}(99)	Bacteria	Chloroflexi					uncultured_Anaerolineae_bacterium
ASV442	0	0	106	0	163	27	352	0	54	266	0	0	0	0	0	968	Bacteria{superkingdom}(100);Planctomycetes{phylum}(100);Planctomycetia{class}(100);Planctomycetales{order}(100);Planctomycetaceae{family}(100);Pirellula{genus}(100);Unassigned{species}(0)	Bacteria	Planctomycetes	Planctomycetia	Planctomycetales	Planctomycetaceae	Pirellula	Unassigned
ASV443	24	0	15	62	51	118	70	37	186	157	0	119	0	0	8	847	Bacteria{superkingdom}(100);Actinobacteria{phylum}(100);Actinobacteria{class}(100);Actinomycetales{order}(100);Micromonosporaceae{family}(100);Unassigned{genus}(0);Unassigned{species}(0)	Bacteria	Actinobacteria	Actinobacteria	Actinomycetales	Micromonosporaceae	Unassigned	Unassigned
ASV444	120	110	72	162	677	0	19	11	9	40	46	28	11	23	13	1341	Bacteria{superkingdom}(100);Actinobacteria{phylum}(100);Actinobacteria{class}(100);Acidimicrobiales{order}(100);Iamiaceae{family}(100);Iamia{genus}(100);uncultured_bacterium{species}(100)	Bacteria	Actinobacteria	Actinobacteria	Acidimicrobiales	Iamiaceae	Iamia	uncultured_bacterium
ASV445	23	64	20	112	272	6	0	0	0	55	0	0	0	122	0	674	Bacteria{superkingdom}(83);Acidobacteria{phylum}(83);Acidobacteria_Gp3{class}(83);{order}(83);{family}(83);{genus}(83);uncultured_Candidatus_Solibacter_sp.{species}(83)	Bacteria	Acidobacteria	Acidobacteria_Gp3				uncultured_Candidatus_Solibacter_sp.
ASV446	41	550	29	119	83	81	103	101	137	249	72	67	245	39	61	1977	Bacteria{superkingdom}(84);Proteobacteria{phylum}(84);Betaproteobacteria{class}(84);{order}(84);{family}(84);{genus}(84);uncultured_Burkholderiaceae_bacterium{species}(84)	Bacteria	Proteobacteria	Betaproteobacteria				uncultured_Burkholderiaceae_bacterium
ASV447	0	0	0	5	801	0	0	0	15	0	0	5	0	0	0	826	Bacteria{superkingdom}(85);Bacteroidetes{phylum}(85);Sphingobacteriia{class}(85);Sphingobacteriales{order}(85);Sphingobacteriaceae{family}(85);Parapedobacter{genus}(85);uncultured_bacterium{species}(85)	Bacteria	Bacteroidetes	Sphingobacteriia	Sphingobacteriales	Sphingobacteriaceae	Parapedobacter	uncultured_bacterium
ASV448	101	28	19	80	1190	119	59	21	105	157	134	45	249	0	75	2382	Bacteria{superkingdom}(100);Acidobacteria{phylum}(100);Acidobacteria_Gp6{class}(100);{order}(100);{family}(100);Gp6{genus}(100);Unassigned{species}(0)	Bacteria	Acidobacteria	Acidobacteria_Gp6			Gp6	Unassigned
ASV449	0	0	0	0	0	0	0	0	0	0	0	49	0	0	0	49	Bacteria{superkingdom}(94);Acidobacteria{phylum}(94);Acidobacteria_Gp3{class}(94);{order}(94);{family}(94);Gp3{genus}(94);Unassigned{species}(0)	Bacteria	Acidobacteria	Acidobacteria_Gp3			Gp3	Unassigned
ASV450	54	847	92	123	40	265	175	46	124	284	36	46	0	0	82	2214	Bacteria{superkingdom}(95);Proteobacteria{phylum}(95);Betaproteobacteria{class}(95);{order}(95);{family}(95);{genus}(95);Unassigned{species}(0)	Bacteria	Proteobacteria	Betaproteobacteria				Unassigned
ASV451	75	274	151	140	169	357	74	0	426	0	0	0	0	37	133	1836	Bacteria{superkingdom}(100);Actinobacteria{phylum}(100);Unassigned{class}(0);Unassigned{order}(0);Unassigned{family}(0);Unassigned{genus}(0);Unassigned{species}(0)	Bacteria	Actinobacteria	Unassigned	Unassigned	Unassigned	Unassigned	Unassigned
ASV452	0	0	0	0	0	0	0	0	20	46	0	0	0	0	0	66	Bacteria{superkingdom}(93);Actinobacteria{phylum}(93);Actinobacteria{class}(93);Actinomycetales{order}(93);Geodermatophilaceae{family}(93);Modestobacter{genus}(93);Unassigned{species}(0)	Bacteria	Actinobacteria	Actinobacteria	Actinomycetales	Geodermatophilaceae	Modestobacter	Unassigned
ASV453	9	37	15	0	32	303	316	230	169	296	160	59	247	19	162	2054	Bacteria{superkingdom}(100);Unassigned{phylum}(0);Unassigned{class}(0);Unassigned{order}(0);Unassigned{family}(0);Unassigned{genus}(0);Unassigned{species}(0)	Bacteria	Unassigned	Unassigned	Unassigned	Unassigned	Unassigned	Unassigned
ASV454	68	593	0	0	0	0	0	154	0	0	7	0	794	0	0	1616	Bacteria{superkingdom}(100);Actinobacteria{phylum}(100);Unassigned{class}(0);Unassigned{order}(0);Unassigned{family}(0);Unassigned{genus}(0);Unassigned{species}(0)	Bacteria	Actinobacteria	Unassigned	Unassigned	Unassigned	Unassigned	Unassigned
ASV456	41	19	163	420	378	0	0	0	0	0	0	0	0	0	12	1033	Bacteria{superkingdom}(100);Proteobacteria{phylum}(100);Alphaproteobacteria{class}(100);Rhizobiales{order}(100);Hyphomicrobiaceae{family}(100);Devosia{genus}(100);Unassigned{species}(0)	Bacteria	Proteobacteria	Alphaproteobacteria	Rhizobiales	Hyphomicrobiaceae	Devosia	Unassigned
ASV457	15	25	14	0	81	35	148	101	42	224	78	49	338	114	50	1314	Bacteria{superkingdom}(92);Proteobacteria{phylum}(92);Betaproteobacteria{class}(92);Burkholderiales{order}(92);Comamonadaceae{family}(92);Ramlibacter{genus}(92);Unassigned{species}(0)	Bacteria	Proteobacteria	Betaproteobacteria	Burkholderiales	Comamonadaceae	Ramlibacter	Unassigned
ASV459	42	93	33	110	225	133	191	67	102	228	150	131	230	80	221	2036	Bacteria{superkingdom}(100);Proteobacteria{phylum}(100);Alphaproteobacteria{class}(100);Rhizobiales{order}(100);Hyphomicrobiaceae{family}(100);Unassigned{genus}(0);Unassigned{species}(0)	Bacteria	Proteobacteria	Alphaproteobacteria	Rhizobiales	Hyphomicrobiaceae	Unassigned	Unassigned
ASV460	0	0	0	0	0	0	0	0	0	0	0	0	0	6	0	6	Bacteria{superkingdom}(99);Bacteroidetes{phylum}(99);Cytophagia{class}(99);Cytophagales{order}(99);Cytophagaceae{family}(99);Rufibacter{genus}(99);uncultured_bacterium{species}(99)	Bacteria	Bacteroidetes	Cytophagia	Cytophagales	Cytophagaceae	Rufibacter	uncultured_bacterium
ASV461	61	0	81	0	442	41	0	0	0	0	0	0	0	0	0	625	Bacteria{superkingdom}(100);Proteobacteria{phylum}(100);Alphaproteobacteria{class}(100);Rhizobiales{order}(100);Rhizobiaceae{family}(100);Ensifer{genus}(100);Unassigned{species}(0)	Bacteria	Proteobacteria	Alphaproteobacteria	Rhizobiales	Rhizobiaceae	Ensifer	Unassigned
ASV462	0	0	0	80	275	0	132	25	0	0	148	0	0	0	0	660	Bacteria{superkingdom}(100);Acidobacteria{phylum}(100);Acidobacteria_Gp4{class}(100);{order}(100);{family}(100);Gp4{genus}(100);Unassigned{species}(0)	Bacteria	Acidobacteria	Acidobacteria_Gp4			Gp4	Unassigned
ASV463	265	0	6	0	12	0	1001	489	118	0	0	0	0	0	0	1891	Bacteria{superkingdom}(100);Chloroflexi{phylum}(100);Anaerolineae{class}(100);Anaerolineales{order}(100);Anaerolineaceae{family}(100);{genus}(100);uncultured_Gemmatimonadetes_bacterium{species}(100)	Bacteria	Chloroflexi	Anaerolineae	Anaerolineales	Anaerolineaceae		uncultured_Gemmatimonadetes_bacterium
ASV466	58	0	102	106	29	402	174	0	197	93	78	30	0	10	66	1345	Bacteria{superkingdom}(100);Planctomycetes{phylum}(100);Planctomycetia{class}(100);Planctomycetales{order}(100);Planctomycetaceae{family}(100);Unassigned{genus}(0);Unassigned{species}(0)	Bacteria	Planctomycetes	Planctomycetia	Planctomycetales	Planctomycetaceae	Unassigned	Unassigned
ASV467	0	378	0	0	0	281	154	98	0	96	0	0	0	79	0	1086	Bacteria{superkingdom}(100);Bacteroidetes{phylum}(100);Sphingobacteriia{class}(100);Sphingobacteriales{order}(100);Chitinophagaceae{family}(100);Unassigned{genus}(0);Unassigned{species}(0)	Bacteria	Bacteroidetes	Sphingobacteriia	Sphingobacteriales	Chitinophagaceae	Unassigned	Unassigned
ASV468	0	83	0	0	0	0	0	1	0	0	0	0	0	0	2	86	Bacteria{superkingdom}(95);Actinobacteria{phylum}(95);Actinobacteria{class}(95);{order}(95);{family}(95);{genus}(95);uncultured_Actinomycetales_bacterium{species}(95)	Bacteria	Actinobacteria	Actinobacteria				uncultured_Actinomycetales_bacterium
ASV469	42	0	83	35	317	0	0	0	0	38	0	39	42	74	25	695	Bacteria{superkingdom}(96);Actinobacteria{phylum}(96);Actinobacteria{class}(96);Actinomycetales{order}(96);Sporichthyaceae{family}(96);Sporichthya{genus}(96);Sporichthya_polymorpha{species}(96)	Bacteria	Actinobacteria	Actinobacteria	Actinomycetales	Sporichthyaceae	Sporichthya	Sporichthya_polymorpha
ASV470	0	0	0	0	0	0	0	23	0	0	0	21	64	58	0	166	Bacteria{superkingdom}(100);Unassigned{phylum}(0);Unassigned{class}(0);Unassigned{order}(0);Unassigned{family}(0);Unassigned{genus}(0);Unassigned{species}(0)	Bacteria	Unassigned	Unassigned	Unassigned	Unassigned	Unassigned	Unassigned
ASV472	214	0	321	225	458	0	0	0	55	79	33	0	0	115	45	1545	Bacteria{superkingdom}(98);Chloroflexi{phylum}(98);Anaerolineae{class}(98);Anaerolineales{order}(98);Anaerolineaceae{family}(98);{genus}(98);uncultured_soil_bacterium{species}(98)	Bacteria	Chloroflexi	Anaerolineae	Anaerolineales	Anaerolineaceae		uncultured_soil_bacterium
ASV473	0	0	0	0	0	0	0	0	0	99	0	78	76	91	23	367	Bacteria{superkingdom}(98);Actinobacteria{phylum}(98);Actinobacteria{class}(98);Actinomycetales{order}(98);Micrococcaceae{family}(98);Arthrobacter{genus}(98);Unassigned{species}(0)	Bacteria	Actinobacteria	Actinobacteria	Actinomycetales	Micrococcaceae	Arthrobacter	Unassigned
ASV474	10	257	0	30	0	0	0	50	0	106	0	16	65	31	8	573	Bacteria{superkingdom}(100);Gemmatimonadetes{phylum}(100);Gemmatimonadetes{class}(100);Gemmatimonadales{order}(100);Gemmatimonadaceae{family}(100);Gemmatimonas{genus}(100);Unassigned{species}(0)	Bacteria	Gemmatimonadetes	Gemmatimonadetes	Gemmatimonadales	Gemmatimonadaceae	Gemmatimonas	Unassigned
ASV475	32	45	32	91	114	353	110	111	145	254	59	393	77	127	331	2274	Bacteria{superkingdom}(83);Proteobacteria{phylum}(83);Betaproteobacteria{class}(83);{order}(83);{family}(83);{genus}(83);bacterium_Ellin6067{species}(83)	Bacteria	Proteobacteria	Betaproteobacteria				bacterium_Ellin6067
ASV477	110	0	58	68	78	81	240	116	29	258	0	0	36	91	164	1329	Bacteria{superkingdom}(99);Chloroflexi{phylum}(99);{class}(99);{order}(99);{family}(99);{genus}(99);Unassigned{species}(0)	Bacteria	Chloroflexi					Unassigned
ASV478	0	28	0	0	0	28	41	6	0	147	0	121	142	63	62	638	Bacteria{superkingdom}(100);Actinobacteria{phylum}(100);Actinobacteria{class}(100);Actinomycetales{order}(100);Geodermatophilaceae{family}(100);Unassigned{genus}(0);Unassigned{species}(0)	Bacteria	Actinobacteria	Actinobacteria	Actinomycetales	Geodermatophilaceae	Unassigned	Unassigned
ASV479	0	0	0	0	1506	0	0	0	0	81	0	0	0	0	0	1587	Bacteria{superkingdom}(100);Acidobacteria{phylum}(100);Acidobacteria_Gp7{class}(100);{order}(100);{family}(100);Gp7{genus}(100);Unassigned{species}(0)	Bacteria	Acidobacteria	Acidobacteria_Gp7			Gp7	Unassigned
ASV480	0	0	0	168	257	0	0	0	0	0	0	0	0	0	0	425	Bacteria{superkingdom}(83);Actinobacteria{phylum}(83);Actinobacteria{class}(83);Actinomycetales{order}(83);Pseudonocardiaceae{family}(83);Unassigned{genus}(0);Unassigned{species}(0)	Bacteria	Actinobacteria	Actinobacteria	Actinomycetales	Pseudonocardiaceae	Unassigned	Unassigned
ASV481	4	5	2	0	12	0	0	202	0	671	3	265	15	81	104	1364	Bacteria{superkingdom}(100);Actinobacteria{phylum}(100);Actinobacteria{class}(100);Actinomycetales{order}(100);Pseudonocardiaceae{family}(100);Unassigned{genus}(0);Unassigned{species}(0)	Bacteria	Actinobacteria	Actinobacteria	Actinomycetales	Pseudonocardiaceae	Unassigned	Unassigned
ASV482	20	71	22	42	45	80	29	132	82	121	113	55	135	84	72	1103	Bacteria{superkingdom}(100);Acidobacteria{phylum}(100);Acidobacteria_Gp6{class}(100);{order}(100);{family}(100);Gp6{genus}(100);Unassigned{species}(0)	Bacteria	Acidobacteria	Acidobacteria_Gp6			Gp6	Unassigned
ASV483	36	0	104	487	245	0	0	0	0	0	0	0	0	0	0	872	Bacteria{superkingdom}(100);Actinobacteria{phylum}(100);Actinobacteria{class}(100);Actinomycetales{order}(100);Pseudonocardiaceae{family}(100);Pseudonocardia{genus}(100);Unassigned{species}(0)	Bacteria	Actinobacteria	Actinobacteria	Actinomycetales	Pseudonocardiaceae	Pseudonocardia	Unassigned
ASV484	0	0	0	0	0	0	0	0	0	63	0	0	0	44	0	107	Bacteria{superkingdom}(100);Proteobacteria{phylum}(100);Betaproteobacteria{class}(100);Nitrosomonadales{order}(100);Nitrosomonadaceae{family}(100);Nitrosomonas{genus}(100);Unassigned{species}(0)	Bacteria	Proteobacteria	Betaproteobacteria	Nitrosomonadales	Nitrosomonadaceae	Nitrosomonas	Unassigned
ASV486	0	104	0	0	0	0	0	15	0	0	0	0	0	0	24	143	Bacteria{superkingdom}(97);Bacteroidetes{phylum}(97);Sphingobacteriia{class}(97);Sphingobacteriales{order}(97);Chitinophagaceae{family}(97);Segetibacter{genus}(97);uncultured_bacterium{species}(97)	Bacteria	Bacteroidetes	Sphingobacteriia	Sphingobacteriales	Chitinophagaceae	Segetibacter	uncultured_bacterium
ASV487	0	0	0	0	0	0	57	150	0	0	0	0	0	0	0	207	Bacteria{superkingdom}(97);Acidobacteria{phylum}(97);Acidobacteria_Gp4{class}(97);{order}(97);{family}(97);Gp4{genus}(97);Unassigned{species}(0)	Bacteria	Acidobacteria	Acidobacteria_Gp4			Gp4	Unassigned
ASV488	0	0	8	0	0	0	0	0	0	0	0	0	0	62	0	70	Bacteria{superkingdom}(100);Bacteroidetes{phylum}(100);Cytophagia{class}(100);Cytophagales{order}(100);Cytophagaceae{family}(100);Adhaeribacter{genus}(100);Unassigned{species}(0)	Bacteria	Bacteroidetes	Cytophagia	Cytophagales	Cytophagaceae	Adhaeribacter	Unassigned
ASV489	0	124	23	35	406	0	0	10	59	0	18	65	0	0	23	763	Bacteria{superkingdom}(99);Acidobacteria{phylum}(99);Acidobacteria_Gp4{class}(99);{order}(99);{family}(99);Aridibacter{genus}(99);Unassigned{species}(0)	Bacteria	Acidobacteria	Acidobacteria_Gp4			Aridibacter	Unassigned
ASV490	9	177	0	0	22	105	133	68	17	73	50	109	460	190	797	2210	Bacteria{superkingdom}(98);Chloroflexi{phylum}(98);Chloroflexia{class}(98);{order}(98);{family}(98);{genus}(98);uncultured_bacterium{species}(98)	Bacteria	Chloroflexi	Chloroflexia				uncultured_bacterium
ASV491	68	335	35	37	210	0	0	0	51	0	0	23	0	36	33	828	Bacteria{superkingdom}(100);Bacteroidetes{phylum}(100);Sphingobacteriia{class}(100);Sphingobacteriales{order}(100);Chitinophagaceae{family}(100);Flavitalea{genus}(100);Unassigned{species}(0)	Bacteria	Bacteroidetes	Sphingobacteriia	Sphingobacteriales	Chitinophagaceae	Flavitalea	Unassigned
ASV492	100	66	250	198	210	0	0	0	0	34	39	203	135	0	26	1261	Bacteria{superkingdom}(90);Actinobacteria{phylum}(90);Actinobacteria{class}(90);Solirubrobacterales{order}(90);{family}(90);{genus}(90);Unassigned{species}(0)	Bacteria	Actinobacteria	Actinobacteria	Solirubrobacterales			Unassigned
ASV493	39	140	20	53	166	265	201	115	82	71	15	0	0	0	35	1202	Bacteria{superkingdom}(100);Proteobacteria{phylum}(100);Betaproteobacteria{class}(100);{order}(100);{family}(100);{genus}(100);Unassigned{species}(0)	Bacteria	Proteobacteria	Betaproteobacteria				Unassigned
ASV494	46	0	27	106	163	18	15	22	72	24	151	87	27	30	45	833	Bacteria{superkingdom}(93);Actinobacteria{phylum}(93);Actinobacteria{class}(93);Acidimicrobiales{order}(93);Iamiaceae{family}(93);{genus}(93);uncultured_Iamia_sp.{species}(93)	Bacteria	Actinobacteria	Actinobacteria	Acidimicrobiales	Iamiaceae		uncultured_Iamia_sp.
ASV495	157	191	0	75	100	0	0	0	0	0	21	0	0	0	0	544	Bacteria{superkingdom}(100);Bacteroidetes{phylum}(100);Flavobacteriia{class}(100);Flavobacteriales{order}(100);Flavobacteriaceae{family}(100);Flavobacterium{genus}(100);Unassigned{species}(0)	Bacteria	Bacteroidetes	Flavobacteriia	Flavobacteriales	Flavobacteriaceae	Flavobacterium	Unassigned
ASV496	100	0	36	57	117	182	37	48	0	84	0	59	0	0	58	778	Bacteria{superkingdom}(100);Planctomycetes{phylum}(100);Planctomycetia{class}(100);Planctomycetales{order}(100);Planctomycetaceae{family}(100);Pirellula{genus}(100);Unassigned{species}(0)	Bacteria	Planctomycetes	Planctomycetia	Planctomycetales	Planctomycetaceae	Pirellula	Unassigned
ASV497	98	0	170	80	0	0	0	0	75	71	50	0	17	0	90	651	Bacteria{superkingdom}(100);Acidobacteria{phylum}(100);Acidobacteria_Gp7{class}(100);{order}(100);{family}(100);Gp7{genus}(100);Unassigned{species}(0)	Bacteria	Acidobacteria	Acidobacteria_Gp7			Gp7	Unassigned
ASV498	70	223	99	68	81	55	333	87	73	48	0	26	0	0	142	1305	Bacteria{superkingdom}(99);Actinobacteria{phylum}(99);Actinobacteria{class}(99);Unassigned{order}(0);Unassigned{family}(0);Unassigned{genus}(0);Unassigned{species}(0)	Bacteria	Actinobacteria	Actinobacteria	Unassigned	Unassigned	Unassigned	Unassigned
ASV499	0	187	0	0	0	0	0	189	0	0	0	0	0	0	0	376	Bacteria{superkingdom}(88);Bacteroidetes{phylum}(88);Cytophagia{class}(88);Cytophagales{order}(88);Cytophagaceae{family}(88);Adhaeribacter{genus}(88);uncultured_bacterium{species}(88)	Bacteria	Bacteroidetes	Cytophagia	Cytophagales	Cytophagaceae	Adhaeribacter	uncultured_bacterium
ASV500	0	147	0	0	0	0	0	24	0	45	0	0	31	0	0	247	Bacteria{superkingdom}(83);Bacteroidetes{phylum}(83);Sphingobacteriia{class}(83);Sphingobacteriales{order}(83);Chitinophagaceae{family}(83);{genus}(83);Unassigned{species}(0)	Bacteria	Bacteroidetes	Sphingobacteriia	Sphingobacteriales	Chitinophagaceae		Unassigned
ASV501	58	0	83	195	904	13	12	22	8	18	33	0	0	0	9	1355	Bacteria{superkingdom}(100);Chloroflexi{phylum}(100);Chloroflexia{class}(100);Chloroflexales{order}(100);{family}(100);{genus}(100);uncultured_soil_bacterium{species}(100)	Bacteria	Chloroflexi	Chloroflexia	Chloroflexales			uncultured_soil_bacterium
ASV502	0	37	0	0	0	0	0	0	0	0	0	0	0	0	0	37	Bacteria{superkingdom}(100);Actinobacteria{phylum}(100);Actinobacteria{class}(100);Actinomycetales{order}(100);Propionibacteriaceae{family}(100);Friedmanniella{genus}(100);Unassigned{species}(0)	Bacteria	Actinobacteria	Actinobacteria	Actinomycetales	Propionibacteriaceae	Friedmanniella	Unassigned
ASV503	0	0	0	0	0	0	0	62	53	0	0	109	0	30	16	270	Bacteria{superkingdom}(96);Proteobacteria{phylum}(96);Gammaproteobacteria{class}(96);{order}(96);{family}(96);{genus}(96);uncultured_Steroidobacter_sp.{species}(96)	Bacteria	Proteobacteria	Gammaproteobacteria				uncultured_Steroidobacter_sp.
ASV504	34	37	44	73	114	63	79	154	19	46	21	25	31	0	62	802	Bacteria{superkingdom}(95);Chloroflexi{phylum}(95);{class}(95);{order}(95);{family}(95);{genus}(95);Unassigned{species}(0)	Bacteria	Chloroflexi					Unassigned
ASV505	0	0	0	134	0	281	259	333	363	143	421	216	0	58	409	2617	Bacteria{superkingdom}(100);Proteobacteria{phylum}(100);Deltaproteobacteria{class}(100);{order}(100);{family}(100);{genus}(100);uncultured_Syntrophobacterales_bacterium{species}(100)	Bacteria	Proteobacteria	Deltaproteobacteria				uncultured_Syntrophobacterales_bacterium
ASV506	0	0	52	153	470	42	80	20	0	0	45	30	0	0	64	956	Bacteria{superkingdom}(97);Proteobacteria{phylum}(97);Alphaproteobacteria{class}(97);Rhizobiales{order}(97);Hyphomicrobiaceae{family}(97);Hyphomicrobium{genus}(97);Unassigned{species}(0)	Bacteria	Proteobacteria	Alphaproteobacteria	Rhizobiales	Hyphomicrobiaceae	Hyphomicrobium	Unassigned
ASV507	26	34	71	32	409	0	0	0	0	0	0	50	0	81	11	714	Bacteria{superkingdom}(100);Bacteroidetes{phylum}(100);Sphingobacteriia{class}(100);Sphingobacteriales{order}(100);Chitinophagaceae{family}(100);Flavitalea{genus}(100);Unassigned{species}(0)	Bacteria	Bacteroidetes	Sphingobacteriia	Sphingobacteriales	Chitinophagaceae	Flavitalea	Unassigned
ASV508	26	28	11	110	210	21	0	7	0	3	0	17	0	0	0	433	Bacteria{superkingdom}(84);Actinobacteria{phylum}(84);Actinobacteria{class}(84);Actinomycetales{order}(84);Pseudonocardiaceae{family}(84);Actinophytocola{genus}(84);uncultured_bacterium{species}(84)	Bacteria	Actinobacteria	Actinobacteria	Actinomycetales	Pseudonocardiaceae	Actinophytocola	uncultured_bacterium
ASV509	0	89	0	0	0	0	29	0	0	35	0	0	0	0	0	153	Bacteria{superkingdom}(100);Proteobacteria{phylum}(100);Alphaproteobacteria{class}(100);Rhizobiales{order}(100);Unassigned{family}(0);Unassigned{genus}(0);Unassigned{species}(0)	Bacteria	Proteobacteria	Alphaproteobacteria	Rhizobiales	Unassigned	Unassigned	Unassigned
ASV510	0	0	0	37	0	0	0	11	0	38	0	0	40	0	0	126	Bacteria{superkingdom}(100);Proteobacteria{phylum}(100);Alphaproteobacteria{class}(100);Rhizobiales{order}(100);Rhizobiaceae{family}(100);Rhizobium{genus}(100);Unassigned{species}(0)	Bacteria	Proteobacteria	Alphaproteobacteria	Rhizobiales	Rhizobiaceae	Rhizobium	Unassigned
ASV511	47	167	39	21	53	72	133	64	36	251	0	41	15	100	63	1102	Bacteria{superkingdom}(100);Planctomycetes{phylum}(100);Planctomycetia{class}(100);Planctomycetales{order}(100);Planctomycetaceae{family}(100);Pirellula{genus}(100);Unassigned{species}(0)	Bacteria	Planctomycetes	Planctomycetia	Planctomycetales	Planctomycetaceae	Pirellula	Unassigned
ASV513	0	1159	0	0	0	0	285	65	0	58	0	0	0	38	0	1605	Bacteria{superkingdom}(100);Proteobacteria{phylum}(100);Alphaproteobacteria{class}(100);Sphingomonadales{order}(100);Sphingomonadaceae{family}(100);Unassigned{genus}(0);Unassigned{species}(0)	Bacteria	Proteobacteria	Alphaproteobacteria	Sphingomonadales	Sphingomonadaceae	Unassigned	Unassigned
ASV514	60	0	0	300	467	263	48	47	22	68	98	0	0	0	0	1373	Bacteria{superkingdom}(100);Bacteroidetes{phylum}(100);Cytophagia{class}(100);Cytophagales{order}(100);{family}(100);Ohtaekwangia{genus}(100);Unassigned{species}(0)	Bacteria	Bacteroidetes	Cytophagia	Cytophagales		Ohtaekwangia	Unassigned
ASV515	0	49	12	0	40	319	352	288	186	172	59	34	179	14	389	2093	Bacteria{superkingdom}(97);{phylum}(97);{class}(97);{order}(97);{family}(97);{genus}(97);uncultured_Gemmatimonadetes_bacterium{species}(97)	Bacteria						uncultured_Gemmatimonadetes_bacterium
ASV516	85	5	128	0	143	0	0	4	0	0	0	0	0	0	0	365	Bacteria{superkingdom}(100);Acidobacteria{phylum}(100);Acidobacteria_Gp4{class}(100);{order}(100);{family}(100);Gp4{genus}(100);Unassigned{species}(0)	Bacteria	Acidobacteria	Acidobacteria_Gp4			Gp4	Unassigned
ASV517	0	0	0	15	0	3	0	8	3	29	0	133	53	81	0	325	Bacteria{superkingdom}(100);Proteobacteria{phylum}(100);Alphaproteobacteria{class}(100);Alphaproteobacteria_incertae_sedis{order}(100);{family}(100);Geminicoccus{genus}(100);Unassigned{species}(0)	Bacteria	Proteobacteria	Alphaproteobacteria	Alphaproteobacteria_incertae_sedis		Geminicoccus	Unassigned
ASV518	31	247	32	78	106	31	40	32	0	99	22	54	70	78	45	965	Bacteria{superkingdom}(100);Proteobacteria{phylum}(100);Alphaproteobacteria{class}(100);Caulobacterales{order}(100);Caulobacteraceae{family}(100);Phenylobacterium{genus}(100);Unassigned{species}(0)	Bacteria	Proteobacteria	Alphaproteobacteria	Caulobacterales	Caulobacteraceae	Phenylobacterium	Unassigned
ASV520	55	0	67	254	387	13	0	114	0	15	0	0	0	0	0	905	Bacteria{superkingdom}(82);Proteobacteria{phylum}(82);Gammaproteobacteria{class}(82);Xanthomonadales{order}(82);{family}(82);{genus}(82);uncultured_Pseudomonadales_bacterium{species}(82)	Bacteria	Proteobacteria	Gammaproteobacteria	Xanthomonadales			uncultured_Pseudomonadales_bacterium
ASV521	0	0	14	37	0	31	0	19	0	126	0	33	115	0	36	411	Bacteria{superkingdom}(86);Proteobacteria{phylum}(86);Alphaproteobacteria{class}(86);Rhizobiales{order}(86);Methylobacteriaceae{family}(86);Microvirga{genus}(86);uncultured_alpha_proteobacterium{species}(86)	Bacteria	Proteobacteria	Alphaproteobacteria	Rhizobiales	Methylobacteriaceae	Microvirga	uncultured_alpha_proteobacterium
ASV522	0	100	22	55	0	0	0	236	17	0	0	0	0	0	0	430	Bacteria{superkingdom}(87);Actinobacteria{phylum}(87);Actinobacteria{class}(87);Actinomycetales{order}(87);Pseudonocardiaceae{family}(87);Kibdelosporangium{genus}(87);uncultured_bacterium{species}(87)	Bacteria	Actinobacteria	Actinobacteria	Actinomycetales	Pseudonocardiaceae	Kibdelosporangium	uncultured_bacterium
ASV523	63	30	243	68	201	216	213	23	118	143	455	33	26	18	114	1964	Bacteria{superkingdom}(99);Chloroflexi{phylum}(99);Thermomicrobia{class}(99);Sphaerobacterales{order}(99);Sphaerobacteraceae{family}(99);Unassigned{genus}(0);Unassigned{species}(0)	Bacteria	Chloroflexi	Thermomicrobia	Sphaerobacterales	Sphaerobacteraceae	Unassigned	Unassigned
ASV524	0	0	0	0	0	0	0	24	0	0	0	0	0	0	0	24	Bacteria{superkingdom}(99);Acidobacteria{phylum}(99);Acidobacteria_Gp4{class}(99);{order}(99);{family}(99);Gp4{genus}(99);Unassigned{species}(0)	Bacteria	Acidobacteria	Acidobacteria_Gp4			Gp4	Unassigned
ASV526	110	0	108	149	120	120	252	65	53	169	0	0	0	0	0	1146	Bacteria{superkingdom}(100);Chloroflexi{phylum}(100);Chloroflexia{class}(100);{order}(100);{family}(100);{genus}(100);uncultured_bacterium{species}(100)	Bacteria	Chloroflexi	Chloroflexia				uncultured_bacterium
ASV527	0	0	17	73	0	0	0	53	0	42	0	87	59	312	0	643	Bacteria{superkingdom}(80);Acidobacteria{phylum}(80);Acidobacteria_Gp10{class}(80);{order}(80);{family}(80);Gp10{genus}(80);uncultured_proteobacterium{species}(80)	Bacteria	Acidobacteria	Acidobacteria_Gp10			Gp10	uncultured_proteobacterium
ASV528	0	0	52	93	97	151	232	299	243	108	34	106	0	93	82	1590	Bacteria{superkingdom}(98);Chloroflexi{phylum}(98);Chloroflexia{class}(98);{order}(98);{family}(98);{genus}(98);uncultured_bacterium{species}(98)	Bacteria	Chloroflexi	Chloroflexia				uncultured_bacterium
ASV529	0	0	0	0	201	0	115	45	0	0	0	54	0	139	0	554	Bacteria{superkingdom}(100);Bacteroidetes{phylum}(100);Sphingobacteriia{class}(100);Sphingobacteriales{order}(100);Chitinophagaceae{family}(100);Chitinophaga{genus}(100);Unassigned{species}(0)	Bacteria	Bacteroidetes	Sphingobacteriia	Sphingobacteriales	Chitinophagaceae	Chitinophaga	Unassigned
ASV530	0	0	0	0	0	0	0	0	0	0	0	26	32	0	0	58	Bacteria{superkingdom}(100);Bacteroidetes{phylum}(100);Sphingobacteriia{class}(100);Sphingobacteriales{order}(100);Chitinophagaceae{family}(100);Flavisolibacter{genus}(100);Unassigned{species}(0)	Bacteria	Bacteroidetes	Sphingobacteriia	Sphingobacteriales	Chitinophagaceae	Flavisolibacter	Unassigned
ASV531	101	19	57	322	332	149	199	26	73	9	9	0	0	8	10	1314	Bacteria{superkingdom}(100);Chloroflexi{phylum}(100);{class}(100);{order}(100);{family}(100);{genus}(100);Unassigned{species}(0)	Bacteria	Chloroflexi					Unassigned
ASV532	67	0	1	99	95	0	0	0	0	69	0	174	34	0	0	539	Bacteria{superkingdom}(100);Actinobacteria{phylum}(100);Actinobacteria{class}(100);Actinomycetales{order}(100);Nocardioidaceae{family}(100);Nocardioides{genus}(100);Unassigned{species}(0)	Bacteria	Actinobacteria	Actinobacteria	Actinomycetales	Nocardioidaceae	Nocardioides	Unassigned
ASV533	0	130	0	69	0	0	0	0	68	0	60	58	0	0	0	385	Bacteria{superkingdom}(91);Actinobacteria{phylum}(91);Actinobacteria{class}(91);Solirubrobacterales{order}(91);Solirubrobacteraceae{family}(91);Solirubrobacter{genus}(91);uncultured_bacterium{species}(91)	Bacteria	Actinobacteria	Actinobacteria	Solirubrobacterales	Solirubrobacteraceae	Solirubrobacter	uncultured_bacterium
ASV534	0	0	0	0	0	0	0	0	0	106	0	0	0	0	0	106	Bacteria{superkingdom}(94);Actinobacteria{phylum}(94);Actinobacteria{class}(94);{order}(94);{family}(94);{genus}(94);uncultured_Actinomycetales_bacterium{species}(94)	Bacteria	Actinobacteria	Actinobacteria				uncultured_Actinomycetales_bacterium
ASV535	36	382	23	34	137	0	0	17	0	0	73	0	0	0	0	702	Bacteria{superkingdom}(85);Actinobacteria{phylum}(85);Actinobacteria{class}(85);Acidimicrobiales{order}(85);Iamiaceae{family}(85);{genus}(85);uncultured_Iamia_sp.{species}(85)	Bacteria	Actinobacteria	Actinobacteria	Acidimicrobiales	Iamiaceae		uncultured_Iamia_sp.
ASV537	0	0	0	21	0	0	74	60	0	147	26	67	335	66	56	852	Bacteria{superkingdom}(85);Proteobacteria{phylum}(85);Alphaproteobacteria{class}(85);Rhizobiales{order}(85);Methylobacteriaceae{family}(85);{genus}(85);uncultured_bacterium{species}(85)	Bacteria	Proteobacteria	Alphaproteobacteria	Rhizobiales	Methylobacteriaceae		uncultured_bacterium
ASV538	0	0	0	0	0	0	0	0	0	0	0	46	18	0	0	64	Bacteria{superkingdom}(100);Chloroflexi{phylum}(100);Thermomicrobia{class}(100);Sphaerobacterales{order}(100);Sphaerobacteraceae{family}(100);Unassigned{genus}(0);Unassigned{species}(0)	Bacteria	Chloroflexi	Thermomicrobia	Sphaerobacterales	Sphaerobacteraceae	Unassigned	Unassigned
ASV539	0	211	0	0	0	40	100	0	0	0	0	0	149	0	0	500	Bacteria{superkingdom}(100);Proteobacteria{phylum}(100);Betaproteobacteria{class}(100);{order}(100);{family}(100);{genus}(100);Unassigned{species}(0)	Bacteria	Proteobacteria	Betaproteobacteria				Unassigned
ASV540	0	54	0	0	0	0	0	0	0	53	0	0	0	31	0	138	Bacteria{superkingdom}(100);Proteobacteria{phylum}(100);Alphaproteobacteria{class}(100);Rhizobiales{order}(100);{family}(100);{genus}(100);uncultured_endolithic_bacterium{species}(100)	Bacteria	Proteobacteria	Alphaproteobacteria	Rhizobiales			uncultured_endolithic_bacterium
ASV541	0	0	0	8	0	0	0	0	5	0	0	0	5	0	0	18	Bacteria{superkingdom}(98);Bacteroidetes{phylum}(98);Cytophagia{class}(98);Cytophagales{order}(98);Cytophagaceae{family}(98);Dyadobacter{genus}(98);Cytophagaceae_bacterium_PTR3{species}(98)	Bacteria	Bacteroidetes	Cytophagia	Cytophagales	Cytophagaceae	Dyadobacter	Cytophagaceae_bacterium_PTR3
ASV542	18	0	0	21	32	0	0	0	0	0	0	0	0	0	0	71	Bacteria{superkingdom}(100);Acidobacteria{phylum}(100);Acidobacteria_Gp10{class}(100);{order}(100);{family}(100);Gp10{genus}(100);Unassigned{species}(0)	Bacteria	Acidobacteria	Acidobacteria_Gp10			Gp10	Unassigned
ASV543	69	120	0	0	0	83	32	37	59	204	0	0	0	117	51	772	Bacteria{superkingdom}(99);Acidobacteria{phylum}(99);Acidobacteria_Gp6{class}(99);{order}(99);{family}(99);Gp6{genus}(99);Unassigned{species}(0)	Bacteria	Acidobacteria	Acidobacteria_Gp6			Gp6	Unassigned
ASV544	0	0	0	0	0	0	0	0	0	131	0	0	0	43	0	174	Bacteria{superkingdom}(100);Proteobacteria{phylum}(100);Alphaproteobacteria{class}(100);Rhizobiales{order}(100);Unassigned{family}(0);Unassigned{genus}(0);Unassigned{species}(0)	Bacteria	Proteobacteria	Alphaproteobacteria	Rhizobiales	Unassigned	Unassigned	Unassigned
ASV545	17	0	14	0	70	38	51	0	26	0	0	0	0	0	507	723	Bacteria{superkingdom}(100);Chloroflexi{phylum}(100);Chloroflexia{class}(100);{order}(100);{family}(100);{genus}(100);uncultured_Herpetosiphon_sp.{species}(100)	Bacteria	Chloroflexi	Chloroflexia				uncultured_Herpetosiphon_sp.
ASV546	115	60	125	138	160	20	69	34	28	86	84	224	26	221	121	1511	Bacteria{superkingdom}(100);Chloroflexi{phylum}(100);Thermomicrobia{class}(100);Unassigned{order}(0);Unassigned{family}(0);Unassigned{genus}(0);Unassigned{species}(0)	Bacteria	Chloroflexi	Thermomicrobia	Unassigned	Unassigned	Unassigned	Unassigned
ASV547	36	0	85	200	0	224	0	48	275	252	91	0	35	0	77	1323	Bacteria{superkingdom}(90);Firmicutes{phylum}(90);Bacilli{class}(90);Bacillales{order}(90);Bacillaceae_1{family}(90);Bacillus{genus}(90);Bacillus_funiculus{species}(90)	Bacteria	Firmicutes	Bacilli	Bacillales	Bacillaceae_1	Bacillus	Bacillus_funiculus
ASV548	36	95	17	53	112	85	213	118	124	106	73	69	22	0	93	1216	Bacteria{superkingdom}(100);Proteobacteria{phylum}(100);Betaproteobacteria{class}(100);{order}(100);{family}(100);{genus}(100);Unassigned{species}(0)	Bacteria	Proteobacteria	Betaproteobacteria				Unassigned
ASV549	0	0	0	0	0	0	0	0	0	0	0	0	0	86	0	86	Bacteria{superkingdom}(100);Proteobacteria{phylum}(100);Unassigned{class}(0);Unassigned{order}(0);Unassigned{family}(0);Unassigned{genus}(0);Unassigned{species}(0)	Bacteria	Proteobacteria	Unassigned	Unassigned	Unassigned	Unassigned	Unassigned
ASV550	33	219	0	0	183	25	0	0	11	32	34	22	0	21	51	631	Bacteria{superkingdom}(94);Proteobacteria{phylum}(94);Alphaproteobacteria{class}(94);Rhizobiales{order}(94);Rhodobiaceae{family}(94);{genus}(94);Nordella_oligomobilis{species}(94)	Bacteria	Proteobacteria	Alphaproteobacteria	Rhizobiales	Rhodobiaceae		Nordella_oligomobilis
ASV551	0	58	0	0	0	0	0	0	0	0	0	0	0	0	0	58	Bacteria{superkingdom}(87);Proteobacteria{phylum}(87);Alphaproteobacteria{class}(87);Rhizobiales{order}(87);Methylobacteriaceae{family}(87);{genus}(87);uncultured_bacterium{species}(87)	Bacteria	Proteobacteria	Alphaproteobacteria	Rhizobiales	Methylobacteriaceae		uncultured_bacterium
ASV552	33	130	20	50	27	22	29	66	15	123	0	0	0	47	8	570	Bacteria{superkingdom}(100);Actinobacteria{phylum}(100);Actinobacteria{class}(100);Rubrobacterales{order}(100);Rubrobacteraceae{family}(100);Rubrobacter{genus}(100);Unassigned{species}(0)	Bacteria	Actinobacteria	Actinobacteria	Rubrobacterales	Rubrobacteraceae	Rubrobacter	Unassigned
ASV553	32	227	43	0	0	0	0	0	0	0	0	0	0	0	0	302	Bacteria{superkingdom}(89);Acidobacteria{phylum}(89);Acidobacteria_Gp4{class}(89);{order}(89);{family}(89);Gp4{genus}(89);uncultured_Rhodopseudomonas_sp.{species}(89)	Bacteria	Acidobacteria	Acidobacteria_Gp4			Gp4	uncultured_Rhodopseudomonas_sp.
ASV554	59	316	0	0	67	591	304	93	0	200	0	0	0	0	0	1630	Bacteria{superkingdom}(99);Chloroflexi{phylum}(99);Caldilineae{class}(99);Caldilineales{order}(99);Caldilineaceae{family}(99);Litorilinea{genus}(99);uncultured_Litorilinea_sp.{species}(99)	Bacteria	Chloroflexi	Caldilineae	Caldilineales	Caldilineaceae	Litorilinea	uncultured_Litorilinea_sp.
ASV555	61	25	48	30	12	0	0	0	0	19	1	0	0	1	35	232	Bacteria{superkingdom}(100);Acidobacteria{phylum}(100);Acidobacteria_Gp10{class}(100);{order}(100);{family}(100);Gp10{genus}(100);Unassigned{species}(0)	Bacteria	Acidobacteria	Acidobacteria_Gp10			Gp10	Unassigned
ASV556	0	193	0	0	0	0	0	27	51	55	0	105	0	84	0	515	Bacteria{superkingdom}(100);Actinobacteria{phylum}(100);Actinobacteria{class}(100);Solirubrobacterales{order}(100);Unassigned{family}(0);Unassigned{genus}(0);Unassigned{species}(0)	Bacteria	Actinobacteria	Actinobacteria	Solirubrobacterales	Unassigned	Unassigned	Unassigned
ASV557	0	0	0	0	0	0	0	0	0	0	0	0	0	7	0	7	Bacteria{superkingdom}(81);Chloroflexi{phylum}(81);Chloroflexia{class}(81);{order}(81);{family}(81);{genus}(81);uncultured_bacterium{species}(81)	Bacteria	Chloroflexi	Chloroflexia				uncultured_bacterium
ASV558	17	0	98	60	100	163	179	13	56	116	0	0	0	0	6	808	Bacteria{superkingdom}(99);Chloroflexi{phylum}(99);{class}(99);{order}(99);{family}(99);{genus}(99);Unassigned{species}(0)	Bacteria	Chloroflexi					Unassigned
ASV559	117	0	27	28	445	111	29	67	438	76	341	0	0	0	6	1685	Bacteria{superkingdom}(80);Firmicutes{phylum}(80);Bacilli{class}(80);Bacillales{order}(80);Planococcaceae{family}(80);Lysinibacillus{genus}(80);Unassigned{species}(0)	Bacteria	Firmicutes	Bacilli	Bacillales	Planococcaceae	Lysinibacillus	Unassigned
ASV560	0	0	0	0	64	27	0	36	0	101	78	257	412	66	42	1083	Bacteria{superkingdom}(100);Chloroflexi{phylum}(100);Thermomicrobia{class}(100);Unassigned{order}(0);Unassigned{family}(0);Unassigned{genus}(0);Unassigned{species}(0)	Bacteria	Chloroflexi	Thermomicrobia	Unassigned	Unassigned	Unassigned	Unassigned
ASV562	0	126	0	0	0	0	0	0	0	0	0	0	0	0	0	126	Bacteria{superkingdom}(100);Chloroflexi{phylum}(100);{class}(100);{order}(100);{family}(100);{genus}(100);uncultured_endolithic_bacterium{species}(100)	Bacteria	Chloroflexi					uncultured_endolithic_bacterium
ASV564	133	0	117	195	178	216	130	60	0	121	0	0	0	0	131	1281	Bacteria{superkingdom}(100);Chloroflexi{phylum}(100);Anaerolineae{class}(100);Anaerolineales{order}(100);Anaerolineaceae{family}(100);{genus}(100);uncultured_soil_bacterium{species}(100)	Bacteria	Chloroflexi	Anaerolineae	Anaerolineales	Anaerolineaceae		uncultured_soil_bacterium
ASV565	0	0	0	0	0	0	0	0	0	53	0	46	0	36	0	135	Bacteria{superkingdom}(94);Actinobacteria{phylum}(94);Actinobacteria{class}(94);Actinomycetales{order}(94);Micrococcaceae{family}(94);Kocuria{genus}(94);Unassigned{species}(0)	Bacteria	Actinobacteria	Actinobacteria	Actinomycetales	Micrococcaceae	Kocuria	Unassigned
ASV567	0	0	0	0	0	0	0	0	0	9	0	0	0	0	0	9	Bacteria{superkingdom}(100);Bacteroidetes{phylum}(100);Cytophagia{class}(100);Cytophagales{order}(100);Cytophagaceae{family}(100);Dyadobacter{genus}(100);Cytophagaceae_bacterium_PTR3{species}(100)	Bacteria	Bacteroidetes	Cytophagia	Cytophagales	Cytophagaceae	Dyadobacter	Cytophagaceae_bacterium_PTR3
ASV568	0	0	0	0	0	36	0	0	443	0	0	0	1229	0	325	2033	Bacteria{superkingdom}(99);Actinobacteria{phylum}(99);Actinobacteria{class}(99);{order}(99);{family}(99);{genus}(99);uncultured_Actinomycetales_bacterium{species}(99)	Bacteria	Actinobacteria	Actinobacteria				uncultured_Actinomycetales_bacterium
ASV569	0	0	0	0	51	0	0	0	0	0	0	0	0	0	22	73	Bacteria{superkingdom}(95);Bacteroidetes{phylum}(95);Sphingobacteriia{class}(95);Sphingobacteriales{order}(95);Chitinophagaceae{family}(95);Segetibacter{genus}(95);uncultured_bacterium{species}(95)	Bacteria	Bacteroidetes	Sphingobacteriia	Sphingobacteriales	Chitinophagaceae	Segetibacter	uncultured_bacterium
ASV570	86	0	0	513	222	40	66	107	21	27	13	0	0	69	0	1164	Bacteria{superkingdom}(100);Proteobacteria{phylum}(100);Alphaproteobacteria{class}(100);Rhodospirillales{order}(100);{family}(100);Reyranella{genus}(100);Unassigned{species}(0)	Bacteria	Proteobacteria	Alphaproteobacteria	Rhodospirillales		Reyranella	Unassigned
ASV571	0	0	0	0	0	0	0	84	54	0	0	44	730	147	88	1147	Bacteria{superkingdom}(100);Bacteroidetes{phylum}(100);Cytophagia{class}(100);Cytophagales{order}(100);Cytophagaceae{family}(100);Adhaeribacter{genus}(100);Unassigned{species}(0)	Bacteria	Bacteroidetes	Cytophagia	Cytophagales	Cytophagaceae	Adhaeribacter	Unassigned
ASV573	28	0	14	20	19	192	311	13	84	664	158	211	74	6	57	1851	Bacteria{superkingdom}(99);Actinobacteria{phylum}(99);Actinobacteria{class}(99);Actinomycetales{order}(99);Nocardioidaceae{family}(99);Nocardioides{genus}(99);Unassigned{species}(0)	Bacteria	Actinobacteria	Actinobacteria	Actinomycetales	Nocardioidaceae	Nocardioides	Unassigned
ASV574	0	0	0	50	0	0	0	0	0	0	0	0	97	41	0	188	Bacteria{superkingdom}(80);Proteobacteria{phylum}(80);Betaproteobacteria{class}(80);{order}(80);{family}(80);{genus}(80);uncultured_Alcaligenaceae_bacterium{species}(80)	Bacteria	Proteobacteria	Betaproteobacteria				uncultured_Alcaligenaceae_bacterium
ASV575	54	0	106	110	0	0	0	0	94	0	28	0	108	0	27	527	Bacteria{superkingdom}(100);Actinobacteria{phylum}(100);Actinobacteria{class}(100);Actinomycetales{order}(100);Nocardioidaceae{family}(100);Nocardioides{genus}(100);Unassigned{species}(0)	Bacteria	Actinobacteria	Actinobacteria	Actinomycetales	Nocardioidaceae	Nocardioides	Unassigned
ASV576	19	0	15	117	131	64	49	57	104	0	37	68	0	69	85	815	Bacteria{superkingdom}(80);Acidobacteria{phylum}(80);{class}(80);{order}(80);{family}(80);{genus}(80);uncultured_microorganism{species}(80)	Bacteria	Acidobacteria					uncultured_microorganism
ASV578	39	0	62	248	154	0	0	0	101	0	0	0	0	0	0	604	Bacteria{superkingdom}(100);Actinobacteria{phylum}(100);Actinobacteria{class}(100);Actinomycetales{order}(100);Nocardioidaceae{family}(100);Nocardioides{genus}(100);Unassigned{species}(0)	Bacteria	Actinobacteria	Actinobacteria	Actinomycetales	Nocardioidaceae	Nocardioides	Unassigned
ASV579	51	215	0	140	260	58	130	0	64	254	43	70	0	0	97	1382	Bacteria{superkingdom}(100);Proteobacteria{phylum}(100);Unassigned{class}(0);Unassigned{order}(0);Unassigned{family}(0);Unassigned{genus}(0);Unassigned{species}(0)	Bacteria	Proteobacteria	Unassigned	Unassigned	Unassigned	Unassigned	Unassigned
ASV580	141	0	52	383	11877	0	62	0	0	43	0	0	0	0	0	12558	Bacteria{superkingdom}(100);Bacteroidetes{phylum}(100);Flavobacteriia{class}(100);Flavobacteriales{order}(100);Flavobacteriaceae{family}(100);Flavobacterium{genus}(100);Unassigned{species}(0)	Bacteria	Bacteroidetes	Flavobacteriia	Flavobacteriales	Flavobacteriaceae	Flavobacterium	Unassigned
ASV581	58	0	155	0	0	0	0	0	0	0	0	0	0	0	0	213	Bacteria{superkingdom}(99);Actinobacteria{phylum}(99);Unassigned{class}(0);Unassigned{order}(0);Unassigned{family}(0);Unassigned{genus}(0);Unassigned{species}(0)	Bacteria	Actinobacteria	Unassigned	Unassigned	Unassigned	Unassigned	Unassigned
ASV582	0	77	0	0	0	0	41	23	0	48	0	280	50	36	15	570	Bacteria{superkingdom}(100);Actinobacteria{phylum}(100);Actinobacteria{class}(100);Actinomycetales{order}(100);Thermomonosporaceae{family}(100);Actinomadura{genus}(100);Unassigned{species}(0)	Bacteria	Actinobacteria	Actinobacteria	Actinomycetales	Thermomonosporaceae	Actinomadura	Unassigned
ASV584	29	122	0	0	0	0	0	0	23	30	0	0	0	11	14	229	Bacteria{superkingdom}(95);Proteobacteria{phylum}(95);Alphaproteobacteria{class}(95);Sphingomonadales{order}(95);Erythrobacteraceae{family}(95);Altererythrobacter{genus}(95);Unassigned{species}(0)	Bacteria	Proteobacteria	Alphaproteobacteria	Sphingomonadales	Erythrobacteraceae	Altererythrobacter	Unassigned
ASV585	0	66	44	30	189	214	223	0	78	79	80	27	57	29	96	1212	Bacteria{superkingdom}(93);Proteobacteria{phylum}(93);Alphaproteobacteria{class}(93);Rhizobiales{order}(93);Rhodobiaceae{family}(93);{genus}(93);Unassigned{species}(0)	Bacteria	Proteobacteria	Alphaproteobacteria	Rhizobiales	Rhodobiaceae		Unassigned
ASV586	58	191	53	62	27	33	0	23	87	26	41	35	0	0	95	731	Bacteria{superkingdom}(100);Proteobacteria{phylum}(100);Betaproteobacteria{class}(100);{order}(100);{family}(100);{genus}(100);Unassigned{species}(0)	Bacteria	Proteobacteria	Betaproteobacteria				Unassigned
ASV587	0	0	0	42	129	0	0	0	31	0	0	0	0	0	0	202	Bacteria{superkingdom}(100);Proteobacteria{phylum}(100);Alphaproteobacteria{class}(100);Rhizobiales{order}(100);Hyphomicrobiaceae{family}(100);Pedomicrobium{genus}(100);Unassigned{species}(0)	Bacteria	Proteobacteria	Alphaproteobacteria	Rhizobiales	Hyphomicrobiaceae	Pedomicrobium	Unassigned
ASV588	73	32	0	30	305	0	0	0	81	0	0	0	0	37	0	558	Bacteria{superkingdom}(94);Actinobacteria{phylum}(94);Actinobacteria{class}(94);Solirubrobacterales{order}(94);Conexibacteraceae{family}(94);Conexibacter{genus}(94);uncultured_Rubrobacteraceae_bacterium{species}(94)	Bacteria	Actinobacteria	Actinobacteria	Solirubrobacterales	Conexibacteraceae	Conexibacter	uncultured_Rubrobacteraceae_bacterium
ASV589	326	0	38	334	929	0	0	0	0	0	153	0	0	0	24	1804	Bacteria{superkingdom}(100);Bacteroidetes{phylum}(100);Cytophagia{class}(100);Cytophagales{order}(100);{family}(100);Ohtaekwangia{genus}(100);Unassigned{species}(0)	Bacteria	Bacteroidetes	Cytophagia	Cytophagales		Ohtaekwangia	Unassigned
ASV590	18	0	18	0	302	0	56	0	0	55	0	0	140	78	8	675	Bacteria{superkingdom}(100);Bacteroidetes{phylum}(100);Sphingobacteriia{class}(100);Sphingobacteriales{order}(100);Chitinophagaceae{family}(100);{genus}(100);agricultural_soil_bacterium_SC-I-64{species}(100)	Bacteria	Bacteroidetes	Sphingobacteriia	Sphingobacteriales	Chitinophagaceae		agricultural_soil_bacterium_SC-I-64
ASV591	0	0	0	0	0	0	0	0	0	0	0	77	0	38	0	115	Bacteria{superkingdom}(100);Actinobacteria{phylum}(100);Actinobacteria{class}(100);Actinomycetales{order}(100);Nocardioidaceae{family}(100);Nocardioides{genus}(100);Unassigned{species}(0)	Bacteria	Actinobacteria	Actinobacteria	Actinomycetales	Nocardioidaceae	Nocardioides	Unassigned
ASV592	81	93	93	216	275	33	95	32	73	116	77	54	0	343	51	1632	Bacteria{superkingdom}(100);Chloroflexi{phylum}(100);Caldilineae{class}(100);Caldilineales{order}(100);Caldilineaceae{family}(100);Litorilinea{genus}(100);Unassigned{species}(0)	Bacteria	Chloroflexi	Caldilineae	Caldilineales	Caldilineaceae	Litorilinea	Unassigned
ASV593	104	0	33	408	351	0	0	0	0	99	31	106	40	21	22	1215	Bacteria{superkingdom}(100);Armatimonadetes{phylum}(100);{class}(100);{order}(100);{family}(100);Armatimonadetes_gp4{genus}(100);uncultured_candidate_division_OP10_bacterium{species}(100)	Bacteria	Armatimonadetes				Armatimonadetes_gp4	uncultured_candidate_division_OP10_bacterium
ASV595	20	143	26	16	59	41	84	130	0	0	0	0	0	28	0	547	Bacteria{superkingdom}(98);Proteobacteria{phylum}(98);Betaproteobacteria{class}(98);{order}(98);{family}(98);{genus}(98);Unassigned{species}(0)	Bacteria	Proteobacteria	Betaproteobacteria				Unassigned
ASV596	49	147	0	143	120	74	0	85	0	815	177	77	0	182	124	1993	Bacteria{superkingdom}(99);Chloroflexi{phylum}(99);Thermomicrobia{class}(99);Sphaerobacterales{order}(99);Sphaerobacteraceae{family}(99);Unassigned{genus}(0);Unassigned{species}(0)	Bacteria	Chloroflexi	Thermomicrobia	Sphaerobacterales	Sphaerobacteraceae	Unassigned	Unassigned
ASV597	0	0	23	32	0	51	49	147	15	339	0	14	0	0	0	670	Bacteria{superkingdom}(87);Actinobacteria{phylum}(87);Actinobacteria{class}(87);Unassigned{order}(0);Unassigned{family}(0);Unassigned{genus}(0);Unassigned{species}(0)	Bacteria	Actinobacteria	Actinobacteria	Unassigned	Unassigned	Unassigned	Unassigned
ASV598	95	54	36	136	160	255	0	0	43	34	22	0	0	0	0	835	Bacteria{superkingdom}(94);Proteobacteria{phylum}(94);Gammaproteobacteria{class}(94);{order}(94);{family}(94);{genus}(94);uncultured_Steroidobacter_sp.{species}(94)	Bacteria	Proteobacteria	Gammaproteobacteria				uncultured_Steroidobacter_sp.
ASV599	0	64	16	42	32	35	53	21	41	56	0	93	0	67	79	599	Bacteria{superkingdom}(94);Actinobacteria{phylum}(94);Actinobacteria{class}(94);Solirubrobacterales{order}(94);{family}(94);{genus}(94);uncultured_bacterium{species}(94)	Bacteria	Actinobacteria	Actinobacteria	Solirubrobacterales			uncultured_bacterium
ASV600	71	0	62	132	228	29	0	36	72	178	18	0	0	0	0	826	Bacteria{superkingdom}(96);Proteobacteria{phylum}(96);Betaproteobacteria{class}(96);Burkholderiales{order}(96);Oxalobacteraceae{family}(96);Massilia{genus}(96);Unassigned{species}(0)	Bacteria	Proteobacteria	Betaproteobacteria	Burkholderiales	Oxalobacteraceae	Massilia	Unassigned
ASV601	0	1246	62	95	0	0	172	158	0	272	0	0	0	0	0	2005	Bacteria{superkingdom}(99);Acidobacteria{phylum}(99);Acidobacteria_Gp16{class}(99);{order}(99);{family}(99);Gp16{genus}(99);uncultured_bacterium{species}(99)	Bacteria	Acidobacteria	Acidobacteria_Gp16			Gp16	uncultured_bacterium
ASV602	167	37	79	110	626	161	105	0	119	176	132	283	0	65	582	2642	Bacteria{superkingdom}(94);Planctomycetes{phylum}(94);Planctomycetia{class}(94);Planctomycetales{order}(94);Planctomycetaceae{family}(94);Gimesia{genus}(94);uncultured_Planctomyces_sp.{species}(94)	Bacteria	Planctomycetes	Planctomycetia	Planctomycetales	Planctomycetaceae	Gimesia	uncultured_Planctomyces_sp.
ASV603	35	70	0	73	109	0	0	50	28	133	66	96	286	91	118	1155	Bacteria{superkingdom}(100);Proteobacteria{phylum}(100);Betaproteobacteria{class}(100);{order}(100);{family}(100);{genus}(100);Unassigned{species}(0)	Bacteria	Proteobacteria	Betaproteobacteria				Unassigned
ASV604	111	66	60	836	846	40	117	20	32	51	40	60	71	44	69	2463	Bacteria{superkingdom}(100);Proteobacteria{phylum}(100);Alphaproteobacteria{class}(100);Rhizobiales{order}(100);Bradyrhizobiaceae{family}(100);Bosea{genus}(100);Unassigned{species}(0)	Bacteria	Proteobacteria	Alphaproteobacteria	Rhizobiales	Bradyrhizobiaceae	Bosea	Unassigned
ASV605	41	193	41	115	163	89	0	0	88	133	0	0	315	65	106	1349	Bacteria{superkingdom}(99);Proteobacteria{phylum}(99);Betaproteobacteria{class}(99);{order}(99);{family}(99);{genus}(99);Unassigned{species}(0)	Bacteria	Proteobacteria	Betaproteobacteria				Unassigned
ASV606	0	62	0	0	0	0	0	24	0	4	0	0	0	0	0	90	Bacteria{superkingdom}(98);Proteobacteria{phylum}(98);Alphaproteobacteria{class}(98);Rhizobiales{order}(98);{family}(98);{genus}(98);uncultured_endolithic_bacterium{species}(98)	Bacteria	Proteobacteria	Alphaproteobacteria	Rhizobiales			uncultured_endolithic_bacterium
ASV607	111	26	152	285	455	56	62	33	56	64	49	45	40	12	80	1526	Bacteria{superkingdom}(100);Chloroflexi{phylum}(100);Caldilineae{class}(100);Caldilineales{order}(100);Caldilineaceae{family}(100);Litorilinea{genus}(100);Unassigned{species}(0)	Bacteria	Chloroflexi	Caldilineae	Caldilineales	Caldilineaceae	Litorilinea	Unassigned
ASV608	42	0	11	214	152	0	0	0	25	0	5	0	0	13	0	462	Bacteria{superkingdom}(84);Acidobacteria{phylum}(84);Acidobacteria_Gp3{class}(84);{order}(84);{family}(84);Gp3{genus}(84);Unassigned{species}(0)	Bacteria	Acidobacteria	Acidobacteria_Gp3			Gp3	Unassigned
ASV609	115	215	0	78	0	54	0	162	0	408	0	0	0	307	76	1415	Bacteria{superkingdom}(81);Actinobacteria{phylum}(81);Actinobacteria{class}(81);Solirubrobacterales{order}(81);Conexibacteraceae{family}(81);Conexibacter{genus}(81);Unassigned{species}(0)	Bacteria	Actinobacteria	Actinobacteria	Solirubrobacterales	Conexibacteraceae	Conexibacter	Unassigned
ASV610	0	0	0	138	396	79	262	180	134	99	71	132	207	46	91	1835	Bacteria{superkingdom}(100);Bacteroidetes{phylum}(100);Sphingobacteriia{class}(100);Sphingobacteriales{order}(100);Chitinophagaceae{family}(100);Flavitalea{genus}(100);Unassigned{species}(0)	Bacteria	Bacteroidetes	Sphingobacteriia	Sphingobacteriales	Chitinophagaceae	Flavitalea	Unassigned
ASV611	72	0	64	60	242	0	0	0	17	0	10	0	14	0	0	479	Bacteria{superkingdom}(100);Gemmatimonadetes{phylum}(100);Gemmatimonadetes{class}(100);Gemmatimonadales{order}(100);Gemmatimonadaceae{family}(100);Gemmatimonas{genus}(100);Unassigned{species}(0)	Bacteria	Gemmatimonadetes	Gemmatimonadetes	Gemmatimonadales	Gemmatimonadaceae	Gemmatimonas	Unassigned
ASV613	174	189	320	0	296	38	46	0	39	0	0	0	0	0	0	1102	Bacteria{superkingdom}(100);Proteobacteria{phylum}(100);Alphaproteobacteria{class}(100);Rhizobiales{order}(100);Rhizobiaceae{family}(100);Ensifer{genus}(100);Unassigned{species}(0)	Bacteria	Proteobacteria	Alphaproteobacteria	Rhizobiales	Rhizobiaceae	Ensifer	Unassigned
ASV614	0	0	4	0	0	0	0	0	0	16	0	0	0	0	0	20	Bacteria{superkingdom}(100);Acidobacteria{phylum}(100);Acidobacteria_Gp4{class}(100);{order}(100);{family}(100);Unassigned{genus}(0);Unassigned{species}(0)	Bacteria	Acidobacteria	Acidobacteria_Gp4			Unassigned	Unassigned
ASV615	0	0	0	0	0	0	0	0	0	0	0	32	15	0	0	47	Bacteria{superkingdom}(100);Actinobacteria{phylum}(100);Unassigned{class}(0);Unassigned{order}(0);Unassigned{family}(0);Unassigned{genus}(0);Unassigned{species}(0)	Bacteria	Actinobacteria	Unassigned	Unassigned	Unassigned	Unassigned	Unassigned
ASV616	24	41	15	23	17	0	0	0	21	56	0	6	0	24	6	233	Bacteria{superkingdom}(88);Actinobacteria{phylum}(88);Actinobacteria{class}(88);Acidimicrobiales{order}(88);Acidimicrobineae_incertae_sedis{family}(88);Aciditerrimonas{genus}(88);uncultured_bacterium{species}(88)	Bacteria	Actinobacteria	Actinobacteria	Acidimicrobiales	Acidimicrobineae_incertae_sedis	Aciditerrimonas	uncultured_bacterium
ASV617	0	41	0	30	0	0	0	0	0	34	0	16	0	0	0	121	Bacteria{superkingdom}(100);Proteobacteria{phylum}(100);Alphaproteobacteria{class}(100);Rhizobiales{order}(100);Hyphomicrobiaceae{family}(100);Devosia{genus}(100);Unassigned{species}(0)	Bacteria	Proteobacteria	Alphaproteobacteria	Rhizobiales	Hyphomicrobiaceae	Devosia	Unassigned
ASV618	0	0	0	0	0	0	0	0	0	0	0	0	0	15	0	15	Bacteria{superkingdom}(100);Actinobacteria{phylum}(100);Actinobacteria{class}(100);Solirubrobacterales{order}(100);Unassigned{family}(0);Unassigned{genus}(0);Unassigned{species}(0)	Bacteria	Actinobacteria	Actinobacteria	Solirubrobacterales	Unassigned	Unassigned	Unassigned
ASV619	0	143	8	0	22	37	53	29	12	66	9	27	108	13	21	548	Bacteria{superkingdom}(99);Proteobacteria{phylum}(99);Alphaproteobacteria{class}(99);{order}(99);{family}(99);{genus}(99);uncultured_Acetobacteraceae_bacterium{species}(99)	Bacteria	Proteobacteria	Alphaproteobacteria				uncultured_Acetobacteraceae_bacterium
ASV620	0	58	0	0	0	0	64	53	38	193	49	47	262	73	41	878	Bacteria{superkingdom}(100);Acidobacteria{phylum}(100);Acidobacteria_Gp6{class}(100);{order}(100);{family}(100);Gp6{genus}(100);Unassigned{species}(0)	Bacteria	Acidobacteria	Acidobacteria_Gp6			Gp6	Unassigned
ASV622	64	0	0	0	0	0	0	0	0	148	22	104	32	113	28	511	Bacteria{superkingdom}(100);Actinobacteria{phylum}(100);Actinobacteria{class}(100);Actinomycetales{order}(100);Pseudonocardiaceae{family}(100);Lentzea{genus}(100);Unassigned{species}(0)	Bacteria	Actinobacteria	Actinobacteria	Actinomycetales	Pseudonocardiaceae	Lentzea	Unassigned
ASV623	33	558	0	0	37	0	45	99	0	76	0	0	0	0	0	848	Bacteria{superkingdom}(97);Actinobacteria{phylum}(97);Actinobacteria{class}(97);Unassigned{order}(0);Unassigned{family}(0);Unassigned{genus}(0);Unassigned{species}(0)	Bacteria	Actinobacteria	Actinobacteria	Unassigned	Unassigned	Unassigned	Unassigned
ASV624	30	93	84	0	0	0	13	0	15	22	0	0	0	0	0	257	Bacteria{superkingdom}(81);Proteobacteria{phylum}(81);Gammaproteobacteria{class}(81);Chromatiales{order}(81);Unassigned{family}(0);Unassigned{genus}(0);Unassigned{species}(0)	Bacteria	Proteobacteria	Gammaproteobacteria	Chromatiales	Unassigned	Unassigned	Unassigned
ASV625	70	203	232	0	192	60	252	0	0	0	0	0	0	0	0	1009	Bacteria{superkingdom}(96);Chloroflexi{phylum}(96);Anaerolineae{class}(96);Anaerolineales{order}(96);Anaerolineaceae{family}(96);{genus}(96);uncultured_soil_bacterium{species}(96)	Bacteria	Chloroflexi	Anaerolineae	Anaerolineales	Anaerolineaceae		uncultured_soil_bacterium
ASV626	33	25	0	88	0	35	64	38	79	79	36	71	0	107	64	719	Bacteria{superkingdom}(100);Acidobacteria{phylum}(100);Acidobacteria_Gp6{class}(100);{order}(100);{family}(100);Gp6{genus}(100);Unassigned{species}(0)	Bacteria	Acidobacteria	Acidobacteria_Gp6			Gp6	Unassigned
ASV628	0	0	0	0	0	0	0	13	191	0	0	0	0	0	0	204	Bacteria{superkingdom}(93);Actinobacteria{phylum}(93);Actinobacteria{class}(93);{order}(93);{family}(93);{genus}(93);uncultured_Actinomycetales_bacterium{species}(93)	Bacteria	Actinobacteria	Actinobacteria				uncultured_Actinomycetales_bacterium
ASV630	11	0	0	0	137	48	30	45	0	101	24	32	66	27	47	568	Bacteria{superkingdom}(100);Proteobacteria{phylum}(100);Gammaproteobacteria{class}(100);Xanthomonadales{order}(100);Sinobacteraceae{family}(100);Unassigned{genus}(0);Unassigned{species}(0)	Bacteria	Proteobacteria	Gammaproteobacteria	Xanthomonadales	Sinobacteraceae	Unassigned	Unassigned
ASV631	14	0	51	0	89	0	0	0	79	0	1068	1028	332	77	82	2820	Bacteria{superkingdom}(100);Actinobacteria{phylum}(100);Actinobacteria{class}(100);Solirubrobacterales{order}(100);Unassigned{family}(0);Unassigned{genus}(0);Unassigned{species}(0)	Bacteria	Actinobacteria	Actinobacteria	Solirubrobacterales	Unassigned	Unassigned	Unassigned
ASV632	0	0	0	57	308	120	0	0	0	32	23	43	24	78	0	685	Bacteria{superkingdom}(100);Proteobacteria{phylum}(100);Gammaproteobacteria{class}(100);Xanthomonadales{order}(100);Sinobacteraceae{family}(100);Steroidobacter{genus}(100);Unassigned{species}(0)	Bacteria	Proteobacteria	Gammaproteobacteria	Xanthomonadales	Sinobacteraceae	Steroidobacter	Unassigned
ASV633	0	768	94	117	756	0	429	76	0	0	59	0	218	124	173	2814	Bacteria{superkingdom}(100);Proteobacteria{phylum}(100);Alphaproteobacteria{class}(100);Rhizobiales{order}(100);Rhizobiaceae{family}(100);Rhizobium{genus}(100);Unassigned{species}(0)	Bacteria	Proteobacteria	Alphaproteobacteria	Rhizobiales	Rhizobiaceae	Rhizobium	Unassigned
ASV634	0	114	0	0	0	0	0	0	0	0	0	0	0	40	0	154	Bacteria{superkingdom}(81);Proteobacteria{phylum}(81);Alphaproteobacteria{class}(81);Rhodospirillales{order}(81);{family}(81);{genus}(81);uncultured_bacterium{species}(81)	Bacteria	Proteobacteria	Alphaproteobacteria	Rhodospirillales			uncultured_bacterium
ASV635	62	102	44	89	183	47	77	82	71	48	91	94	38	102	100	1230	Bacteria{superkingdom}(98);Chloroflexi{phylum}(98);{class}(98);{order}(98);{family}(98);{genus}(98);uncultured_Firmicutes_bacterium{species}(98)	Bacteria	Chloroflexi					uncultured_Firmicutes_bacterium
ASV636	70	284	42	73	183	50	95	63	26	137	5	88	0	174	13	1303	Bacteria{superkingdom}(100);Planctomycetes{phylum}(100);Planctomycetia{class}(100);Planctomycetales{order}(100);Planctomycetaceae{family}(100);Pirellula{genus}(100);Unassigned{species}(0)	Bacteria	Planctomycetes	Planctomycetia	Planctomycetales	Planctomycetaceae	Pirellula	Unassigned
ASV637	0	41	0	0	0	0	0	0	0	42	38	0	0	13	0	134	Bacteria{superkingdom}(100);Actinobacteria{phylum}(100);Actinobacteria{class}(100);Solirubrobacterales{order}(100);Unassigned{family}(0);Unassigned{genus}(0);Unassigned{species}(0)	Bacteria	Actinobacteria	Actinobacteria	Solirubrobacterales	Unassigned	Unassigned	Unassigned
ASV638	0	0	0	0	0	0	0	0	0	0	0	26	0	13	0	39	Bacteria{superkingdom}(100);Actinobacteria{phylum}(100);Actinobacteria{class}(100);Actinomycetales{order}(100);Geodermatophilaceae{family}(100);Blastococcus{genus}(100);Unassigned{species}(0)	Bacteria	Actinobacteria	Actinobacteria	Actinomycetales	Geodermatophilaceae	Blastococcus	Unassigned
ASV640	23	0	36	84	248	19	70	69	25	103	91	79	110	18	28	1003	Bacteria{superkingdom}(99);Chloroflexi{phylum}(99);Unassigned{class}(0);Unassigned{order}(0);Unassigned{family}(0);Unassigned{genus}(0);Unassigned{species}(0)	Bacteria	Chloroflexi	Unassigned	Unassigned	Unassigned	Unassigned	Unassigned
ASV641	21	45	6	128	169	0	9	0	0	0	43	5	8	0	37	471	Bacteria{superkingdom}(100);Proteobacteria{phylum}(100);Alphaproteobacteria{class}(100);Rhodospirillales{order}(100);Rhodospirillaceae{family}(100);Inquilinus{genus}(100);Unassigned{species}(0)	Bacteria	Proteobacteria	Alphaproteobacteria	Rhodospirillales	Rhodospirillaceae	Inquilinus	Unassigned
ASV642	56	43	40	80	59	118	49	129	130	35	0	0	0	0	57	796	Bacteria{superkingdom}(100);Armatimonadetes{phylum}(100);Chthonomonadetes{class}(100);Chthonomonadales{order}(100);Chthonomonadaceae{family}(100);Chthonomonas/Armatimonadetes_gp3{genus}(100);Unassigned{species}(0)	Bacteria	Armatimonadetes	Chthonomonadetes	Chthonomonadales	Chthonomonadaceae	Chthonomonas/Armatimonadetes_gp3	Unassigned
ASV643	239	23	42	183	29	0	0	51	0	211	11	102	0	34	11	936	Bacteria{superkingdom}(81);Chloroflexi{phylum}(81);Thermomicrobia{class}(81);Sphaerobacterales{order}(81);Sphaerobacteraceae{family}(81);Nitrolancea{genus}(81);uncultured_bacterium{species}(81)	Bacteria	Chloroflexi	Thermomicrobia	Sphaerobacterales	Sphaerobacteraceae	Nitrolancea	uncultured_bacterium
ASV644	41	41	23	95	53	65	100	28	85	42	36	52	46	38	67	812	Bacteria{superkingdom}(100);Proteobacteria{phylum}(100);Gammaproteobacteria{class}(100);Enterobacteriales{order}(100);Enterobacteriaceae{family}(100);Escherichia/Shigella{genus}(100);Unassigned{species}(0)	Bacteria	Proteobacteria	Gammaproteobacteria	Enterobacteriales	Enterobacteriaceae	Escherichia/Shigella	Unassigned
ASV645	37	0	46	123	492	0	0	0	19	27	817	0	0	0	47	1608	Bacteria{superkingdom}(87);Chloroflexi{phylum}(87);Unassigned{class}(0);Unassigned{order}(0);Unassigned{family}(0);Unassigned{genus}(0);Unassigned{species}(0)	Bacteria	Chloroflexi	Unassigned	Unassigned	Unassigned	Unassigned	Unassigned
ASV646	61	225	109	55	175	42	105	21	57	126	22	102	75	65	73	1313	Bacteria{superkingdom}(89);{phylum}(89);{class}(89);{order}(89);{family}(89);{genus}(89);uncultured_Heliobacterium_sp.{species}(89)	Bacteria						uncultured_Heliobacterium_sp.
ASV647	49	0	31	373	314	0	0	18	24	0	0	0	0	34	0	843	Bacteria{superkingdom}(100);Proteobacteria{phylum}(100);Gammaproteobacteria{class}(100);Xanthomonadales{order}(100);Sinobacteraceae{family}(100);Unassigned{genus}(0);Unassigned{species}(0)	Bacteria	Proteobacteria	Gammaproteobacteria	Xanthomonadales	Sinobacteraceae	Unassigned	Unassigned
ASV648	0	0	0	0	0	0	0	0	0	0	0	52	0	33	15	100	Bacteria{superkingdom}(100);Actinobacteria{phylum}(100);Actinobacteria{class}(100);Actinomycetales{order}(100);Microbacteriaceae{family}(100);Unassigned{genus}(0);Unassigned{species}(0)	Bacteria	Actinobacteria	Actinobacteria	Actinomycetales	Microbacteriaceae	Unassigned	Unassigned
ASV649	0	255	0	20	0	0	46	33	0	59	90	155	0	53	0	711	Bacteria{superkingdom}(95);Actinobacteria{phylum}(95);Actinobacteria{class}(95);Acidimicrobiales{order}(95);Acidimicrobineae_incertae_sedis{family}(95);Aciditerrimonas{genus}(95);Unassigned{species}(0)	Bacteria	Actinobacteria	Actinobacteria	Acidimicrobiales	Acidimicrobineae_incertae_sedis	Aciditerrimonas	Unassigned
ASV650	0	0	0	0	0	0	59	21	0	64	0	39	39	29	67	318	Bacteria{superkingdom}(100);Bacteroidetes{phylum}(100);Sphingobacteriia{class}(100);Sphingobacteriales{order}(100);Chitinophagaceae{family}(100);Segetibacter{genus}(100);Unassigned{species}(0)	Bacteria	Bacteroidetes	Sphingobacteriia	Sphingobacteriales	Chitinophagaceae	Segetibacter	Unassigned
ASV651	0	106	15	0	109	11	0	0	0	0	264	32	29	0	13	579	Bacteria{superkingdom}(100);Actinobacteria{phylum}(100);Actinobacteria{class}(100);Solirubrobacterales{order}(100);Conexibacteraceae{family}(100);Conexibacter{genus}(100);Unassigned{species}(0)	Bacteria	Actinobacteria	Actinobacteria	Solirubrobacterales	Conexibacteraceae	Conexibacter	Unassigned
ASV652	0	296	0	0	0	27	57	35	0	154	0	0	0	0	0	569	Bacteria{superkingdom}(97);Actinobacteria{phylum}(97);Actinobacteria{class}(97);Acidimicrobiales{order}(97);Acidimicrobiaceae{family}(97);Ilumatobacter{genus}(97);uncultured_soil_bacterium{species}(97)	Bacteria	Actinobacteria	Actinobacteria	Acidimicrobiales	Acidimicrobiaceae	Ilumatobacter	uncultured_soil_bacterium
ASV653	0	0	172	304	61	33	0	0	82	0	148	0	0	0	0	800	Bacteria{superkingdom}(100);Bacteroidetes{phylum}(100);Cytophagia{class}(100);Cytophagales{order}(100);Cytophagaceae{family}(100);Adhaeribacter{genus}(100);Unassigned{species}(0)	Bacteria	Bacteroidetes	Cytophagia	Cytophagales	Cytophagaceae	Adhaeribacter	Unassigned
ASV654	43	39	0	0	67	103	62	95	0	148	0	0	0	0	0	557	Bacteria{superkingdom}(98);Proteobacteria{phylum}(98);Alphaproteobacteria{class}(98);Rhizobiales{order}(98);Rhodobiaceae{family}(98);Methyloceanibacter{genus}(98);Unassigned{species}(0)	Bacteria	Proteobacteria	Alphaproteobacteria	Rhizobiales	Rhodobiaceae	Methyloceanibacter	Unassigned
ASV655	0	73	0	0	338	107	0	211	0	121	0	0	0	46	0	896	Bacteria{superkingdom}(99);Proteobacteria{phylum}(99);Alphaproteobacteria{class}(99);Rhizobiales{order}(99);Hyphomicrobiaceae{family}(99);Hyphomicrobium{genus}(99);Unassigned{species}(0)	Bacteria	Proteobacteria	Alphaproteobacteria	Rhizobiales	Hyphomicrobiaceae	Hyphomicrobium	Unassigned
ASV656	24	0	6	88	70	124	107	29	58	164	163	204	33	63	27	1160	Bacteria{superkingdom}(94);Actinobacteria{phylum}(94);Actinobacteria{class}(94);Actinomycetales{order}(94);Micromonosporaceae{family}(94);Catelliglobosispora{genus}(94);Unassigned{species}(0)	Bacteria	Actinobacteria	Actinobacteria	Actinomycetales	Micromonosporaceae	Catelliglobosispora	Unassigned
ASV657	0	454	0	0	0	0	0	0	178	0	379	0	133	0	49	1193	Bacteria{superkingdom}(90);Actinobacteria{phylum}(90);Actinobacteria{class}(90);Solirubrobacterales{order}(90);{family}(90);{genus}(90);Unassigned{species}(0)	Bacteria	Actinobacteria	Actinobacteria	Solirubrobacterales			Unassigned
ASV658	0	0	0	0	0	0	0	0	0	0	0	10	0	15	0	25	Bacteria{superkingdom}(100);Chloroflexi{phylum}(100);Chloroflexia{class}(100);Unassigned{order}(0);Unassigned{family}(0);Unassigned{genus}(0);Unassigned{species}(0)	Bacteria	Chloroflexi	Chloroflexia	Unassigned	Unassigned	Unassigned	Unassigned
ASV659	0	0	0	0	56	194	192	197	94	342	441	819	2064	53	25	4477	Bacteria{superkingdom}(100);Bacteroidetes{phylum}(100);Sphingobacteriia{class}(100);Sphingobacteriales{order}(100);Chitinophagaceae{family}(100);Unassigned{genus}(0);Unassigned{species}(0)	Bacteria	Bacteroidetes	Sphingobacteriia	Sphingobacteriales	Chitinophagaceae	Unassigned	Unassigned
ASV660	33	0	126	0	140	91	333	68	84	448	107	0	0	0	172	1602	Bacteria{superkingdom}(100);Planctomycetes{phylum}(100);Planctomycetia{class}(100);Planctomycetales{order}(100);Planctomycetaceae{family}(100);Gimesia{genus}(100);Unassigned{species}(0)	Bacteria	Planctomycetes	Planctomycetia	Planctomycetales	Planctomycetaceae	Gimesia	Unassigned
ASV662	0	0	0	0	0	0	0	0	0	0	0	8	0	9	0	17	Bacteria{superkingdom}(93);Chloroflexi{phylum}(93);Thermomicrobia{class}(93);Sphaerobacterales{order}(93);Sphaerobacteraceae{family}(93);{genus}(93);Unassigned{species}(0)	Bacteria	Chloroflexi	Thermomicrobia	Sphaerobacterales	Sphaerobacteraceae		Unassigned
ASV663	0	10227	11	77	0	0	0	0	0	0	13	0	11	0	0	10339	Bacteria{superkingdom}(99);Proteobacteria{phylum}(99);Gammaproteobacteria{class}(99);Pseudomonadales{order}(99);Pseudomonadaceae{family}(99);Azotobacter{genus}(99);Unassigned{species}(0)	Bacteria	Proteobacteria	Gammaproteobacteria	Pseudomonadales	Pseudomonadaceae	Azotobacter	Unassigned
ASV664	202	0	23	64	43	157	84	18	90	344	44	20	0	31	52	1172	Bacteria{superkingdom}(89);Actinobacteria{phylum}(89);Actinobacteria{class}(89);Solirubrobacterales{order}(89);Conexibacteraceae{family}(89);Conexibacter{genus}(89);uncultured_bacterium{species}(89)	Bacteria	Actinobacteria	Actinobacteria	Solirubrobacterales	Conexibacteraceae	Conexibacter	uncultured_bacterium
ASV665	41	577	50	0	0	10	0	0	0	27	0	0	0	0	0	705	Bacteria{superkingdom}(100);Unassigned{phylum}(0);Unassigned{class}(0);Unassigned{order}(0);Unassigned{family}(0);Unassigned{genus}(0);Unassigned{species}(0)	Bacteria	Unassigned	Unassigned	Unassigned	Unassigned	Unassigned	Unassigned
ASV666	0	347	0	0	0	0	0	0	0	0	0	0	0	0	0	347	Bacteria{superkingdom}(100);Actinobacteria{phylum}(100);Actinobacteria{class}(100);Rubrobacterales{order}(100);Rubrobacteraceae{family}(100);Rubrobacter{genus}(100);Unassigned{species}(0)	Bacteria	Actinobacteria	Actinobacteria	Rubrobacterales	Rubrobacteraceae	Rubrobacter	Unassigned
ASV667	71	132	133	308	0	0	0	0	0	214	0	274	38	0	15	1185	Bacteria{superkingdom}(94);Chloroflexi{phylum}(94);Thermomicrobia{class}(94);Sphaerobacterales{order}(94);Sphaerobacteraceae{family}(94);{genus}(94);uncultured_Thermomicrobium_sp.{species}(94)	Bacteria	Chloroflexi	Thermomicrobia	Sphaerobacterales	Sphaerobacteraceae		uncultured_Thermomicrobium_sp.
ASV668	32	0	0	191	201	51	0	26	40	0	71	24	0	0	0	636	Bacteria{superkingdom}(100);Proteobacteria{phylum}(100);Alphaproteobacteria{class}(100);Rhodospirillales{order}(100);{family}(100);Reyranella{genus}(100);Unassigned{species}(0)	Bacteria	Proteobacteria	Alphaproteobacteria	Rhodospirillales		Reyranella	Unassigned
ASV669	0	49	0	0	0	0	0	0	0	93	0	38	13	43	0	236	Bacteria{superkingdom}(97);Proteobacteria{phylum}(97);Alphaproteobacteria{class}(97);Rhodobacterales{order}(97);Rhodobacteraceae{family}(97);Paracoccus{genus}(97);Unassigned{species}(0)	Bacteria	Proteobacteria	Alphaproteobacteria	Rhodobacterales	Rhodobacteraceae	Paracoccus	Unassigned
ASV670	11	0	2	39	0	0	0	101	319	29	55	28	340	78	36	1038	Bacteria{superkingdom}(100);Bacteroidetes{phylum}(100);Sphingobacteriia{class}(100);Sphingobacteriales{order}(100);Chitinophagaceae{family}(100);Unassigned{genus}(0);Unassigned{species}(0)	Bacteria	Bacteroidetes	Sphingobacteriia	Sphingobacteriales	Chitinophagaceae	Unassigned	Unassigned
ASV671	0	73	51	132	146	0	0	57	0	0	214	0	0	0	0	673	Bacteria{superkingdom}(86);Actinobacteria{phylum}(86);Actinobacteria{class}(86);Acidimicrobiales{order}(86);Iamiaceae{family}(86);{genus}(86);Unassigned{species}(0)	Bacteria	Actinobacteria	Actinobacteria	Acidimicrobiales	Iamiaceae		Unassigned
ASV673	59	19	42	82	245	35	21	55	29	79	137	71	86	52	131	1143	Bacteria{superkingdom}(100);Proteobacteria{phylum}(100);Alphaproteobacteria{class}(100);Rhizobiales{order}(100);Hyphomicrobiaceae{family}(100);Devosia{genus}(100);Unassigned{species}(0)	Bacteria	Proteobacteria	Alphaproteobacteria	Rhizobiales	Hyphomicrobiaceae	Devosia	Unassigned
ASV674	0	0	0	6	0	0	0	0	3	0	0	0	0	0	0	9	Bacteria{superkingdom}(95);Bacteroidetes{phylum}(95);Cytophagia{class}(95);Cytophagales{order}(95);Cytophagaceae{family}(95);Nibrella{genus}(95);uncultured_bacterium{species}(95)	Bacteria	Bacteroidetes	Cytophagia	Cytophagales	Cytophagaceae	Nibrella	uncultured_bacterium
ASV675	147	104	110	0	75	114	74	103	0	231	0	0	0	20	20	998	Bacteria{superkingdom}(93);Actinobacteria{phylum}(93);Actinobacteria{class}(93);Solirubrobacterales{order}(93);{family}(93);{genus}(93);Unassigned{species}(0)	Bacteria	Actinobacteria	Actinobacteria	Solirubrobacterales			Unassigned
ASV676	0	0	0	0	0	0	0	0	0	13	0	46	14	0	0	73	Bacteria{superkingdom}(100);Proteobacteria{phylum}(100);Alphaproteobacteria{class}(100);Rhizobiales{order}(100);Methylobacteriaceae{family}(100);Methylobacterium{genus}(100);Unassigned{species}(0)	Bacteria	Proteobacteria	Alphaproteobacteria	Rhizobiales	Methylobacteriaceae	Methylobacterium	Unassigned
ASV677	0	787	71	110	257	0	0	0	0	0	0	0	0	0	0	1225	Bacteria{superkingdom}(86);Actinobacteria{phylum}(86);Actinobacteria{class}(86);Solirubrobacterales{order}(86);Conexibacteraceae{family}(86);Conexibacter{genus}(86);uncultured_Thermoleophilum_sp.{species}(86)	Bacteria	Actinobacteria	Actinobacteria	Solirubrobacterales	Conexibacteraceae	Conexibacter	uncultured_Thermoleophilum_sp.
ASV678	0	64	16	28	24	15	30	41	26	32	0	0	25	7	16	324	Bacteria{superkingdom}(100);Proteobacteria{phylum}(100);Alphaproteobacteria{class}(100);Rhodospirillales{order}(100);{family}(100);{genus}(100);uncultured_Maricaulis_sp.{species}(100)	Bacteria	Proteobacteria	Alphaproteobacteria	Rhodospirillales			uncultured_Maricaulis_sp.
ASV679	0	0	0	0	0	0	0	0	0	0	0	315	0	0	0	315	Bacteria{superkingdom}(82);Proteobacteria{phylum}(82);Deltaproteobacteria{class}(82);Myxococcales{order}(82);Cystobacteraceae{family}(82);Cystobacter{genus}(82);Cystobacter_fuscus{species}(82)	Bacteria	Proteobacteria	Deltaproteobacteria	Myxococcales	Cystobacteraceae	Cystobacter	Cystobacter_fuscus
ASV680	0	0	0	0	0	0	0	0	0	96	0	65	0	40	0	201	Bacteria{superkingdom}(100);Proteobacteria{phylum}(100);Alphaproteobacteria{class}(100);Rhizobiales{order}(100);Bradyrhizobiaceae{family}(100);Unassigned{genus}(0);Unassigned{species}(0)	Bacteria	Proteobacteria	Alphaproteobacteria	Rhizobiales	Bradyrhizobiaceae	Unassigned	Unassigned
ASV682	42	43	28	217	83	47	57	79	43	143	27	94	28	23	47	1001	Bacteria{superkingdom}(94);candidate_division_WPS-1{phylum}(94);{class}(94);{order}(94);{family}(94);WPS-1_genera_incertae_sedis{genus}(94);uncultured_bacterium{species}(94)	Bacteria	candidate_division_WPS-1				WPS-1_genera_incertae_sedis	uncultured_bacterium
ASV683	0	19	0	64	43	27	48	50	31	237	0	32	0	21	33	605	Bacteria{superkingdom}(100);Gemmatimonadetes{phylum}(100);Gemmatimonadetes{class}(100);Gemmatimonadales{order}(100);Gemmatimonadaceae{family}(100);Gemmatimonas{genus}(100);Unassigned{species}(0)	Bacteria	Gemmatimonadetes	Gemmatimonadetes	Gemmatimonadales	Gemmatimonadaceae	Gemmatimonas	Unassigned
ASV684	26	73	52	15	48	158	103	76	22	63	10	23	58	0	23	750	Bacteria{superkingdom}(82);Proteobacteria{phylum}(82);Alphaproteobacteria{class}(82);Rhodospirillales{order}(82);{family}(82);{genus}(82);uncultured_bacterium{species}(82)	Bacteria	Proteobacteria	Alphaproteobacteria	Rhodospirillales			uncultured_bacterium
ASV685	0	0	0	0	0	0	0	0	0	0	0	55	0	0	0	55	Bacteria{superkingdom}(100);Actinobacteria{phylum}(100);Actinobacteria{class}(100);Actinomycetales{order}(100);Nocardioidaceae{family}(100);Nocardioides{genus}(100);Unassigned{species}(0)	Bacteria	Actinobacteria	Actinobacteria	Actinomycetales	Nocardioidaceae	Nocardioides	Unassigned
ASV686	0	110	32	0	0	227	0	0	101	0	0	0	626	0	567	1663	Bacteria{superkingdom}(99);Actinobacteria{phylum}(99);Actinobacteria{class}(99);{order}(99);{family}(99);{genus}(99);uncultured_Actinomycetales_bacterium{species}(99)	Bacteria	Actinobacteria	Actinobacteria				uncultured_Actinomycetales_bacterium
ASV687	0	87	0	0	0	0	0	0	0	0	0	0	0	0	0	87	Bacteria{superkingdom}(99);Bacteroidetes{phylum}(99);Sphingobacteriia{class}(99);Sphingobacteriales{order}(99);Chitinophagaceae{family}(99);Segetibacter{genus}(99);uncultured_bacterium{species}(99)	Bacteria	Bacteroidetes	Sphingobacteriia	Sphingobacteriales	Chitinophagaceae	Segetibacter	uncultured_bacterium
ASV689	0	0	0	0	0	0	0	0	0	0	0	0	0	22	0	22	Bacteria{superkingdom}(100);Chloroflexi{phylum}(100);Chloroflexia{class}(100);Kallotenuales{order}(100);Kallotenuaceae{family}(100);Kallotenue{genus}(100);uncultured_bacterium{species}(100)	Bacteria	Chloroflexi	Chloroflexia	Kallotenuales	Kallotenuaceae	Kallotenue	uncultured_bacterium
ASV690	0	390	0	0	0	0	0	0	12	86	34	114	50	52	0	738	Bacteria{superkingdom}(100);Actinobacteria{phylum}(100);Unassigned{class}(0);Unassigned{order}(0);Unassigned{family}(0);Unassigned{genus}(0);Unassigned{species}(0)	Bacteria	Actinobacteria	Unassigned	Unassigned	Unassigned	Unassigned	Unassigned
ASV691	0	0	0	0	0	0	32	44	0	69	0	0	0	42	0	187	Bacteria{superkingdom}(100);{phylum}(100);{class}(100);{order}(100);{family}(100);{genus}(100);uncultured_candidate_division_WYO_bacterium{species}(100)	Bacteria						uncultured_candidate_division_WYO_bacterium
ASV693	0	0	0	0	0	0	0	0	0	0	0	31	0	0	0	31	Bacteria{superkingdom}(98);Chloroflexi{phylum}(98);Chloroflexia{class}(98);Kallotenuales{order}(98);Kallotenuaceae{family}(98);Kallotenue{genus}(98);uncultured_bacterium{species}(98)	Bacteria	Chloroflexi	Chloroflexia	Kallotenuales	Kallotenuaceae	Kallotenue	uncultured_bacterium
ASV694	37	384	32	44	0	0	130	20	56	93	0	0	0	246	28	1070	Bacteria{superkingdom}(100);Actinobacteria{phylum}(100);Actinobacteria{class}(100);Actinomycetales{order}(100);Streptomycetaceae{family}(100);Streptomyces{genus}(100);Unassigned{species}(0)	Bacteria	Actinobacteria	Actinobacteria	Actinomycetales	Streptomycetaceae	Streptomyces	Unassigned
ASV695	0	0	0	0	0	0	0	0	0	24	0	16	44	32	0	116	Bacteria{superkingdom}(100);Proteobacteria{phylum}(100);Alphaproteobacteria{class}(100);Rhodobacterales{order}(100);Rhodobacteraceae{family}(100);Rubellimicrobium{genus}(100);Unassigned{species}(0)	Bacteria	Proteobacteria	Alphaproteobacteria	Rhodobacterales	Rhodobacteraceae	Rubellimicrobium	Unassigned
ASV697	0	7	0	0	0	0	0	0	0	0	0	6	0	15	0	28	Bacteria{superkingdom}(100);Bacteroidetes{phylum}(100);Sphingobacteriia{class}(100);Sphingobacteriales{order}(100);Chitinophagaceae{family}(100);{genus}(100);Unassigned{species}(0)	Bacteria	Bacteroidetes	Sphingobacteriia	Sphingobacteriales	Chitinophagaceae		Unassigned
ASV698	0	0	0	0	0	0	0	0	0	0	0	0	0	28	0	28	Bacteria{superkingdom}(99);Actinobacteria{phylum}(99);Actinobacteria{class}(99);Actinomycetales{order}(99);Geodermatophilaceae{family}(99);Modestobacter{genus}(99);Unassigned{species}(0)	Bacteria	Actinobacteria	Actinobacteria	Actinomycetales	Geodermatophilaceae	Modestobacter	Unassigned
ASV700	26	173	24	44	64	80	179	87	18	424	50	234	232	77	118	1830	Bacteria{superkingdom}(100);Proteobacteria{phylum}(100);Alphaproteobacteria{class}(100);Rhizobiales{order}(100);Methylobacteriaceae{family}(100);Microvirga{genus}(100);Unassigned{species}(0)	Bacteria	Proteobacteria	Alphaproteobacteria	Rhizobiales	Methylobacteriaceae	Microvirga	Unassigned
ASV701	14	0	25	0	0	0	0	37	63	76	48	170	211	80	57	781	Bacteria{superkingdom}(100);Chloroflexi{phylum}(100);Chloroflexia{class}(100);Kallotenuales{order}(100);Kallotenuaceae{family}(100);Kallotenue{genus}(100);Unassigned{species}(0)	Bacteria	Chloroflexi	Chloroflexia	Kallotenuales	Kallotenuaceae	Kallotenue	Unassigned
ASV702	26	0	28	115	189	32	54	33	54	58	8	38	10	12	42	699	Bacteria{superkingdom}(95);Acidobacteria{phylum}(95);Acidobacteria_Gp6{class}(95);{order}(95);{family}(95);Gp6{genus}(95);agricultural_soil_bacterium_SC-I-9{species}(95)	Bacteria	Acidobacteria	Acidobacteria_Gp6			Gp6	agricultural_soil_bacterium_SC-I-9
ASV703	32	93	0	25	19	45	213	158	43	183	0	9	0	0	0	820	Bacteria{superkingdom}(91);Chloroflexi{phylum}(91);{class}(91);{order}(91);{family}(91);{genus}(91);uncultured_Sphaerobacter_sp.{species}(91)	Bacteria	Chloroflexi					uncultured_Sphaerobacter_sp.
ASV705	0	0	0	0	0	0	0	0	0	0	0	29	0	0	0	29	Bacteria{superkingdom}(96);Acidobacteria{phylum}(96);Acidobacteria_Gp3{class}(96);{order}(96);{family}(96);Gp3{genus}(96);Unassigned{species}(0)	Bacteria	Acidobacteria	Acidobacteria_Gp3			Gp3	Unassigned
ASV706	0	0	0	0	43	67	103	67	12	0	45	99	221	31	110	798	Bacteria{superkingdom}(100);Bacteroidetes{phylum}(100);Sphingobacteriia{class}(100);Sphingobacteriales{order}(100);Chitinophagaceae{family}(100);Segetibacter{genus}(100);Unassigned{species}(0)	Bacteria	Bacteroidetes	Sphingobacteriia	Sphingobacteriales	Chitinophagaceae	Segetibacter	Unassigned
ASV708	0	21	0	0	0	0	0	0	0	251	0	1	0	0	39	312	Bacteria{superkingdom}(100);Acidobacteria{phylum}(100);Acidobacteria_Gp10{class}(100);{order}(100);{family}(100);Gp10{genus}(100);Unassigned{species}(0)	Bacteria	Acidobacteria	Acidobacteria_Gp10			Gp10	Unassigned
ASV709	67	34	26	206	393	0	59	16	0	79	0	0	10	100	0	990	Bacteria{superkingdom}(95);Chloroflexi{phylum}(95);Unassigned{class}(0);Unassigned{order}(0);Unassigned{family}(0);Unassigned{genus}(0);Unassigned{species}(0)	Bacteria	Chloroflexi	Unassigned	Unassigned	Unassigned	Unassigned	Unassigned
ASV710	32	0	24	316	263	0	0	0	0	0	0	0	0	0	0	635	Bacteria{superkingdom}(100);Proteobacteria{phylum}(100);Gammaproteobacteria{class}(100);Xanthomonadales{order}(100);Xanthomonadaceae{family}(100);Lysobacter{genus}(100);Unassigned{species}(0)	Bacteria	Proteobacteria	Gammaproteobacteria	Xanthomonadales	Xanthomonadaceae	Lysobacter	Unassigned
ASV711	0	37	0	0	0	0	22	0	0	81	0	0	0	0	0	140	Bacteria{superkingdom}(100);Acidobacteria{phylum}(100);Acidobacteria_Gp4{class}(100);{order}(100);{family}(100);Gp4{genus}(100);Unassigned{species}(0)	Bacteria	Acidobacteria	Acidobacteria_Gp4			Gp4	Unassigned
ASV713	0	173	71	0	83	91	0	0	0	0	0	0	42	0	0	460	Bacteria{superkingdom}(100);Proteobacteria{phylum}(100);Alphaproteobacteria{class}(100);Rhodospirillales{order}(100);Rhodospirillaceae{family}(100);Constrictibacter{genus}(100);uncultured_bacterium{species}(100)	Bacteria	Proteobacteria	Alphaproteobacteria	Rhodospirillales	Rhodospirillaceae	Constrictibacter	uncultured_bacterium
ASV714	0	0	40	0	129	0	344	293	18	920	167	0	27	0	107	2045	Bacteria{superkingdom}(100);Proteobacteria{phylum}(100);Unassigned{class}(0);Unassigned{order}(0);Unassigned{family}(0);Unassigned{genus}(0);Unassigned{species}(0)	Bacteria	Proteobacteria	Unassigned	Unassigned	Unassigned	Unassigned	Unassigned
ASV715	0	0	0	35	0	0	521	196	35	113	0	0	0	0	0	900	Bacteria{superkingdom}(96);Acidobacteria{phylum}(96);Acidobacteria_Gp4{class}(96);{order}(96);{family}(96);Gp4{genus}(96);Unassigned{species}(0)	Bacteria	Acidobacteria	Acidobacteria_Gp4			Gp4	Unassigned
ASV716	0	0	0	46	0	13	0	29	0	55	0	0	77	0	0	220	Bacteria{superkingdom}(100);Actinobacteria{phylum}(100);Actinobacteria{class}(100);Acidimicrobiales{order}(100);Unassigned{family}(0);Unassigned{genus}(0);Unassigned{species}(0)	Bacteria	Actinobacteria	Actinobacteria	Acidimicrobiales	Unassigned	Unassigned	Unassigned
ASV718	127	0	177	0	207	273	203	0	105	66	0	0	0	0	36	1194	Bacteria{superkingdom}(80);Chloroflexi{phylum}(80);{class}(80);{order}(80);{family}(80);{genus}(80);uncultured_soil_bacterium{species}(80)	Bacteria	Chloroflexi					uncultured_soil_bacterium
ASV719	102	0	125	60	228	0	0	0	39	0	0	0	36	28	0	618	Bacteria{superkingdom}(100);Actinobacteria{phylum}(100);Actinobacteria{class}(100);Actinomycetales{order}(100);Nocardioidaceae{family}(100);Nocardioides{genus}(100);Unassigned{species}(0)	Bacteria	Actinobacteria	Actinobacteria	Actinomycetales	Nocardioidaceae	Nocardioides	Unassigned
ASV721	0	0	0	0	0	0	32	20	0	45	18	33	0	0	0	148	Bacteria{superkingdom}(93);Actinobacteria{phylum}(93);Actinobacteria{class}(93);Actinomycetales{order}(93);Geodermatophilaceae{family}(93);Geodermatophilus{genus}(93);Unassigned{species}(0)	Bacteria	Actinobacteria	Actinobacteria	Actinomycetales	Geodermatophilaceae	Geodermatophilus	Unassigned
ASV722	0	0	0	0	7	0	0	0	0	0	0	0	0	0	0	7	Bacteria{superkingdom}(98);Chloroflexi{phylum}(98);Chloroflexia{class}(98);Kallotenuales{order}(98);Kallotenuaceae{family}(98);Kallotenue{genus}(98);uncultured_Chloroflexi_bacterium{species}(98)	Bacteria	Chloroflexi	Chloroflexia	Kallotenuales	Kallotenuaceae	Kallotenue	uncultured_Chloroflexi_bacterium
ASV724	0	0	0	0	0	8	0	0	14	38	12	21	0	0	0	93	Bacteria{superkingdom}(94);Actinobacteria{phylum}(94);Actinobacteria{class}(94);Acidimicrobiales{order}(94);Acidimicrobineae_incertae_sedis{family}(94);Aciditerrimonas{genus}(94);Unassigned{species}(0)	Bacteria	Actinobacteria	Actinobacteria	Acidimicrobiales	Acidimicrobineae_incertae_sedis	Aciditerrimonas	Unassigned
ASV725	96	0	0	0	213	0	0	0	0	0	0	0	0	0	0	309	Bacteria{superkingdom}(92);Actinobacteria{phylum}(92);Actinobacteria{class}(92);Actinomycetales{order}(92);Pseudonocardiaceae{family}(92);Actinophytocola{genus}(92);uncultured_bacterium{species}(92)	Bacteria	Actinobacteria	Actinobacteria	Actinomycetales	Pseudonocardiaceae	Actinophytocola	uncultured_bacterium
ASV726	150	0	118	68	242	128	122	89	76	56	63	23	0	24	165	1324	Bacteria{superkingdom}(100);Chloroflexi{phylum}(100);Caldilineae{class}(100);Caldilineales{order}(100);Caldilineaceae{family}(100);Litorilinea{genus}(100);Unassigned{species}(0)	Bacteria	Chloroflexi	Caldilineae	Caldilineales	Caldilineaceae	Litorilinea	Unassigned
ASV727	0	19	0	0	0	0	0	0	0	0	0	0	0	0	0	19	Bacteria{superkingdom}(91);{phylum}(91);{class}(91);{order}(91);{family}(91);{genus}(91);uncultured_Gemmatimonadetes_bacterium{species}(91)	Bacteria						uncultured_Gemmatimonadetes_bacterium
ASV728	93	98	21	62	539	89	80	27	61	16	13	14	0	46	38	1197	Bacteria{superkingdom}(98);Nitrospirae{phylum}(98);Nitrospira{class}(98);Nitrospirales{order}(98);Nitrospiraceae{family}(98);Nitrospira{genus}(98);uncultured_Nitrospiraceae_bacterium{species}(98)	Bacteria	Nitrospirae	Nitrospira	Nitrospirales	Nitrospiraceae	Nitrospira	uncultured_Nitrospiraceae_bacterium
ASV729	0	41	0	0	0	0	0	0	0	0	0	0	0	0	0	41	Bacteria{superkingdom}(90);Actinobacteria{phylum}(90);Actinobacteria{class}(90);Actinomycetales{order}(90);Pseudonocardiaceae{family}(90);Amycolatopsis{genus}(90);Unassigned{species}(0)	Bacteria	Actinobacteria	Actinobacteria	Actinomycetales	Pseudonocardiaceae	Amycolatopsis	Unassigned
ASV731	0	0	0	0	0	0	622	0	0	0	65	0	0	0	130	817	Bacteria{superkingdom}(97);Actinobacteria{phylum}(97);Actinobacteria{class}(97);Solirubrobacterales{order}(97);Unassigned{family}(0);Unassigned{genus}(0);Unassigned{species}(0)	Bacteria	Actinobacteria	Actinobacteria	Solirubrobacterales	Unassigned	Unassigned	Unassigned
ASV732	0	608	0	0	0	0	2775	158	40	0	58	0	0	0	0	3639	Bacteria{superkingdom}(100);Bacteroidetes{phylum}(100);Sphingobacteriia{class}(100);Sphingobacteriales{order}(100);Chitinophagaceae{family}(100);Unassigned{genus}(0);Unassigned{species}(0)	Bacteria	Bacteroidetes	Sphingobacteriia	Sphingobacteriales	Chitinophagaceae	Unassigned	Unassigned
ASV733	0	19	35	0	45	0	0	0	42	0	0	0	0	0	106	247	Bacteria{superkingdom}(97);Actinobacteria{phylum}(97);Actinobacteria{class}(97);{order}(97);{family}(97);{genus}(97);uncultured_Actinomycetales_bacterium{species}(97)	Bacteria	Actinobacteria	Actinobacteria				uncultured_Actinomycetales_bacterium
ASV734	0	0	0	0	19	0	0	0	0	0	0	0	0	0	0	19	Bacteria{superkingdom}(94);Acidobacteria{phylum}(94);Acidobacteria_Gp4{class}(94);{order}(94);{family}(94);Blastocatella{genus}(94);Unassigned{species}(0)	Bacteria	Acidobacteria	Acidobacteria_Gp4			Blastocatella	Unassigned
ASV736	38	487	0	193	72	23	93	35	73	66	187	292	28	213	189	1989	Bacteria{superkingdom}(99);Acidobacteria{phylum}(99);Acidobacteria_Gp4{class}(99);{order}(99);{family}(99);Aridibacter{genus}(99);Unassigned{species}(0)	Bacteria	Acidobacteria	Acidobacteria_Gp4			Aridibacter	Unassigned
ASV737	0	0	0	0	0	0	102	0	0	86	0	62	48	62	0	360	Bacteria{superkingdom}(100);Proteobacteria{phylum}(100);Betaproteobacteria{class}(100);{order}(100);{family}(100);{genus}(100);Unassigned{species}(0)	Bacteria	Proteobacteria	Betaproteobacteria				Unassigned
ASV738	0	0	0	0	0	0	0	0	0	0	0	34	18	0	0	52	Bacteria{superkingdom}(100);Proteobacteria{phylum}(100);Alphaproteobacteria{class}(100);Rhizobiales{order}(100);Hyphomicrobiaceae{family}(100);Devosia{genus}(100);Unassigned{species}(0)	Bacteria	Proteobacteria	Alphaproteobacteria	Rhizobiales	Hyphomicrobiaceae	Devosia	Unassigned
ASV739	0	0	0	23	0	0	0	0	0	0	0	0	0	0	0	23	Bacteria{superkingdom}(98);Actinobacteria{phylum}(98);Actinobacteria{class}(98);Unassigned{order}(0);Unassigned{family}(0);Unassigned{genus}(0);Unassigned{species}(0)	Bacteria	Actinobacteria	Actinobacteria	Unassigned	Unassigned	Unassigned	Unassigned
ASV740	0	0	0	0	0	0	0	0	0	0	0	0	0	18	0	18	Bacteria{superkingdom}(100);Bacteroidetes{phylum}(100);Sphingobacteriia{class}(100);Sphingobacteriales{order}(100);Chitinophagaceae{family}(100);Segetibacter{genus}(100);Unassigned{species}(0)	Bacteria	Bacteroidetes	Sphingobacteriia	Sphingobacteriales	Chitinophagaceae	Segetibacter	Unassigned
ASV741	0	0	0	0	254	0	0	0	0	0	141	0	0	0	0	395	Bacteria{superkingdom}(88);Bacteroidetes{phylum}(88);Cytophagia{class}(88);Cytophagales{order}(88);{family}(88);Ohtaekwangia{genus}(88);uncultured_Bacteroidetes_bacterium{species}(88)	Bacteria	Bacteroidetes	Cytophagia	Cytophagales		Ohtaekwangia	uncultured_Bacteroidetes_bacterium
ASV742	16	0	20	208	0	18	30	46	41	0	0	0	0	11	17	407	Bacteria{superkingdom}(100);Firmicutes{phylum}(100);Bacilli{class}(100);Bacillales{order}(100);Paenibacillaceae_1{family}(100);Paenibacillus{genus}(100);Unassigned{species}(0)	Bacteria	Firmicutes	Bacilli	Bacillales	Paenibacillaceae_1	Paenibacillus	Unassigned
ASV743	39	56	0	248	0	385	140	55	255	0	85	0	0	0	37	1300	Bacteria{superkingdom}(100);Proteobacteria{phylum}(100);Betaproteobacteria{class}(100);{order}(100);{family}(100);{genus}(100);Unassigned{species}(0)	Bacteria	Proteobacteria	Betaproteobacteria				Unassigned
ASV744	0	0	0	0	0	0	0	0	0	0	0	0	0	24	0	24	Bacteria{superkingdom}(100);Actinobacteria{phylum}(100);Actinobacteria{class}(100);Actinomycetales{order}(100);Microbacteriaceae{family}(100);Agrococcus{genus}(100);Unassigned{species}(0)	Bacteria	Actinobacteria	Actinobacteria	Actinomycetales	Microbacteriaceae	Agrococcus	Unassigned
ASV745	0	0	155	93	0	0	0	0	0	0	0	0	0	58	0	306	Bacteria{superkingdom}(98);Proteobacteria{phylum}(98);Alphaproteobacteria{class}(98);Rhizobiales{order}(98);Rhizobiaceae{family}(98);Rhizobium{genus}(98);Unassigned{species}(0)	Bacteria	Proteobacteria	Alphaproteobacteria	Rhizobiales	Rhizobiaceae	Rhizobium	Unassigned
ASV746	0	98	52	97	175	0	0	13	0	0	0	0	0	0	0	435	Bacteria{superkingdom}(96);{phylum}(96);{class}(96);{order}(96);{family}(96);{genus}(96);uncultured_Anaerolineae_bacterium{species}(96)	Bacteria						uncultured_Anaerolineae_bacterium
ASV747	0	0	18	64	0	217	373	104	0	319	47	17	0	0	0	1159	Bacteria{superkingdom}(100);Actinobacteria{phylum}(100);Actinobacteria{class}(100);Solirubrobacterales{order}(100);Unassigned{family}(0);Unassigned{genus}(0);Unassigned{species}(0)	Bacteria	Actinobacteria	Actinobacteria	Solirubrobacterales	Unassigned	Unassigned	Unassigned
ASV748	0	0	0	89	0	0	0	0	0	0	0	0	0	0	0	89	Bacteria{superkingdom}(100);Acidobacteria{phylum}(100);Acidobacteria_Gp7{class}(100);{order}(100);{family}(100);Gp7{genus}(100);Unassigned{species}(0)	Bacteria	Acidobacteria	Acidobacteria_Gp7			Gp7	Unassigned
ASV749	11	87	0	53	0	33	27	107	74	137	19	37	82	38	19	724	Bacteria{superkingdom}(83);Gemmatimonadetes{phylum}(83);Gemmatimonadetes{class}(83);Gemmatimonadales{order}(83);Gemmatimonadaceae{family}(83);Gemmatimonas{genus}(83);uncultured_Gemmatimonadales_bacterium{species}(83)	Bacteria	Gemmatimonadetes	Gemmatimonadetes	Gemmatimonadales	Gemmatimonadaceae	Gemmatimonas	uncultured_Gemmatimonadales_bacterium
ASV750	0	0	0	78	0	0	0	0	0	0	0	7	0	0	0	85	Bacteria{superkingdom}(100);Acidobacteria{phylum}(100);Acidobacteria_Gp7{class}(100);{order}(100);{family}(100);Gp7{genus}(100);Unassigned{species}(0)	Bacteria	Acidobacteria	Acidobacteria_Gp7			Gp7	Unassigned
ASV751	0	0	0	0	0	11	90	63	0	164	0	129	99	104	44	704	Bacteria{superkingdom}(100);Actinobacteria{phylum}(100);Actinobacteria{class}(100);Actinomycetales{order}(100);Intrasporangiaceae{family}(100);Unassigned{genus}(0);Unassigned{species}(0)	Bacteria	Actinobacteria	Actinobacteria	Actinomycetales	Intrasporangiaceae	Unassigned	Unassigned
ASV752	0	0	0	0	0	83	0	32	0	487	0	0	0	0	0	602	Bacteria{superkingdom}(80);Bacteroidetes{phylum}(80);Sphingobacteriia{class}(80);Sphingobacteriales{order}(80);Chitinophagaceae{family}(80);Flavitalea{genus}(80);uncultured_Niastella_sp.{species}(80)	Bacteria	Bacteroidetes	Sphingobacteriia	Sphingobacteriales	Chitinophagaceae	Flavitalea	uncultured_Niastella_sp.
ASV753	0	77	0	0	0	0	0	25	0	0	0	25	0	0	0	127	Bacteria{superkingdom}(98);Bacteroidetes{phylum}(98);Sphingobacteriia{class}(98);Sphingobacteriales{order}(98);Chitinophagaceae{family}(98);Segetibacter{genus}(98);uncultured_bacterium{species}(98)	Bacteria	Bacteroidetes	Sphingobacteriia	Sphingobacteriales	Chitinophagaceae	Segetibacter	uncultured_bacterium
ASV754	14	0	53	44	0	0	137	0	0	0	0	0	0	0	0	248	Bacteria{superkingdom}(100);Acidobacteria{phylum}(100);Acidobacteria_Gp10{class}(100);{order}(100);{family}(100);Gp10{genus}(100);Unassigned{species}(0)	Bacteria	Acidobacteria	Acidobacteria_Gp10			Gp10	Unassigned
ASV755	52	177	0	0	24	18	41	0	82	0	0	0	54	0	34	482	Bacteria{superkingdom}(97);Actinobacteria{phylum}(97);Actinobacteria{class}(97);Acidimicrobiales{order}(97);Acidimicrobineae_incertae_sedis{family}(97);Aciditerrimonas{genus}(97);Unassigned{species}(0)	Bacteria	Actinobacteria	Actinobacteria	Acidimicrobiales	Acidimicrobineae_incertae_sedis	Aciditerrimonas	Unassigned
ASV757	37	0	11	0	0	396	143	153	105	42	17	0	40	0	52	996	Bacteria{superkingdom}(100);Actinobacteria{phylum}(100);Unassigned{class}(0);Unassigned{order}(0);Unassigned{family}(0);Unassigned{genus}(0);Unassigned{species}(0)	Bacteria	Actinobacteria	Unassigned	Unassigned	Unassigned	Unassigned	Unassigned
ASV758	72	110	72	136	351	0	0	10	0	0	0	104	50	25	14	944	Bacteria{superkingdom}(100);Actinobacteria{phylum}(100);Actinobacteria{class}(100);Actinomycetales{order}(100);Nocardioidaceae{family}(100);Nocardioides{genus}(100);Unassigned{species}(0)	Bacteria	Actinobacteria	Actinobacteria	Actinomycetales	Nocardioidaceae	Nocardioides	Unassigned
ASV760	29	110	23	89	120	43	66	112	72	212	86	82	222	178	176	1620	Bacteria{superkingdom}(100);Proteobacteria{phylum}(100);Alphaproteobacteria{class}(100);Rhizobiales{order}(100);Rhizobiales_incertae_sedis{family}(100);Vasilyevaea{genus}(100);Unassigned{species}(0)	Bacteria	Proteobacteria	Alphaproteobacteria	Rhizobiales	Rhizobiales_incertae_sedis	Vasilyevaea	Unassigned
ASV761	78	100	19	0	53	0	22	0	0	0	0	0	0	0	0	272	Bacteria{superkingdom}(100);Armatimonadetes{phylum}(100);{class}(100);{order}(100);{family}(100);Armatimonadetes_gp4{genus}(100);Unassigned{species}(0)	Bacteria	Armatimonadetes				Armatimonadetes_gp4	Unassigned
ASV762	0	0	17	142	0	45	100	53	176	0	0	0	0	0	53	586	Bacteria{superkingdom}(100);Acidobacteria{phylum}(100);Acidobacteria_Gp6{class}(100);{order}(100);{family}(100);Gp6{genus}(100);Unassigned{species}(0)	Bacteria	Acidobacteria	Acidobacteria_Gp6			Gp6	Unassigned
ASV764	0	0	0	0	0	0	0	0	0	0	0	0	0	4	0	4	Bacteria{superkingdom}(100);Proteobacteria{phylum}(100);Betaproteobacteria{class}(100);Burkholderiales{order}(100);Oxalobacteraceae{family}(100);Unassigned{genus}(0);Unassigned{species}(0)	Bacteria	Proteobacteria	Betaproteobacteria	Burkholderiales	Oxalobacteraceae	Unassigned	Unassigned
ASV765	49	0	0	0	0	0	0	0	0	318	0	0	0	22	0	389	Bacteria{superkingdom}(94);Bacteroidetes{phylum}(94);Cytophagia{class}(94);Cytophagales{order}(94);{family}(94);Chryseolinea{genus}(94);Unassigned{species}(0)	Bacteria	Bacteroidetes	Cytophagia	Cytophagales		Chryseolinea	Unassigned
ASV766	0	0	6	0	0	0	0	0	0	0	0	0	0	0	0	6	Bacteria{superkingdom}(88);Chloroflexi{phylum}(88);Unassigned{class}(0);Unassigned{order}(0);Unassigned{family}(0);Unassigned{genus}(0);Unassigned{species}(0)	Bacteria	Chloroflexi	Unassigned	Unassigned	Unassigned	Unassigned	Unassigned
ASV767	54	0	8	268	0	20	0	0	177	131	158	165	194	0	65	1240	Bacteria{superkingdom}(100);Nitrospirae{phylum}(100);Nitrospira{class}(100);Nitrospirales{order}(100);Nitrospiraceae{family}(100);Nitrospira{genus}(100);Unassigned{species}(0)	Bacteria	Nitrospirae	Nitrospira	Nitrospirales	Nitrospiraceae	Nitrospira	Unassigned
ASV768	33	0	43	145	0	0	0	0	79	0	0	0	0	0	0	300	Bacteria{superkingdom}(86);Actinobacteria{phylum}(86);Actinobacteria{class}(86);Actinomycetales{order}(86);Nocardioidaceae{family}(86);{genus}(86);Unassigned{species}(0)	Bacteria	Actinobacteria	Actinobacteria	Actinomycetales	Nocardioidaceae		Unassigned
ASV769	0	0	0	0	0	0	0	0	0	0	0	22	34	7	0	63	Bacteria{superkingdom}(100);Actinobacteria{phylum}(100);Actinobacteria{class}(100);Actinomycetales{order}(100);Nocardioidaceae{family}(100);Nocardioides{genus}(100);Unassigned{species}(0)	Bacteria	Actinobacteria	Actinobacteria	Actinomycetales	Nocardioidaceae	Nocardioides	Unassigned
ASV770	0	0	0	39	0	18	0	77	29	0	30	0	0	0	0	193	Bacteria{superkingdom}(100);Armatimonadetes{phylum}(100);{class}(100);{order}(100);{family}(100);Armatimonadetes_gp4{genus}(100);Unassigned{species}(0)	Bacteria	Armatimonadetes				Armatimonadetes_gp4	Unassigned
ASV771	0	60	0	0	0	162	0	0	0	59	0	0	0	0	0	281	Bacteria{superkingdom}(99);Proteobacteria{phylum}(99);Gammaproteobacteria{class}(99);Pseudomonadales{order}(99);Pseudomonadaceae{family}(99);Pseudomonas{genus}(99);Unassigned{species}(0)	Bacteria	Proteobacteria	Gammaproteobacteria	Pseudomonadales	Pseudomonadaceae	Pseudomonas	Unassigned
ASV772	0	41	0	0	17	0	0	7	0	27	0	13	0	5	0	110	Bacteria{superkingdom}(100);{phylum}(100);{class}(100);{order}(100);{family}(100);{genus}(100);uncultured_candidate_division_WYO_bacterium{species}(100)	Bacteria						uncultured_candidate_division_WYO_bacterium
ASV774	15	0	38	57	0	74	79	204	63	178	0	0	0	0	0	708	Bacteria{superkingdom}(100);{phylum}(100);{class}(100);{order}(100);{family}(100);{genus}(100);uncultured_Cytophaga_sp.{species}(100)	Bacteria						uncultured_Cytophaga_sp.
ASV775	0	10	0	0	0	0	0	0	0	0	0	0	0	58	0	68	Bacteria{superkingdom}(81);Bacteroidetes{phylum}(81);Cytophagia{class}(81);Cytophagales{order}(81);Cytophagaceae{family}(81);Adhaeribacter{genus}(81);uncultured_bacterium{species}(81)	Bacteria	Bacteroidetes	Cytophagia	Cytophagales	Cytophagaceae	Adhaeribacter	uncultured_bacterium
ASV776	0	37	0	0	0	0	0	0	9	98	7	0	0	10	0	161	Bacteria{superkingdom}(100);Bacteroidetes{phylum}(100);Sphingobacteriia{class}(100);Sphingobacteriales{order}(100);Chitinophagaceae{family}(100);Segetibacter{genus}(100);Unassigned{species}(0)	Bacteria	Bacteroidetes	Sphingobacteriia	Sphingobacteriales	Chitinophagaceae	Segetibacter	Unassigned
ASV777	34	0	22	0	172	175	230	194	48	125	187	136	0	112	110	1545	Bacteria{superkingdom}(100);Planctomycetes{phylum}(100);Planctomycetia{class}(100);Planctomycetales{order}(100);Planctomycetaceae{family}(100);Unassigned{genus}(0);Unassigned{species}(0)	Bacteria	Planctomycetes	Planctomycetia	Planctomycetales	Planctomycetaceae	Unassigned	Unassigned
ASV778	0	0	0	0	0	0	0	0	0	230	0	0	0	0	0	230	Bacteria{superkingdom}(99);Acidobacteria{phylum}(99);Acidobacteria_Gp4{class}(99);{order}(99);{family}(99);Gp4{genus}(99);Unassigned{species}(0)	Bacteria	Acidobacteria	Acidobacteria_Gp4			Gp4	Unassigned
ASV780	56	28	34	13	120	52	110	26	34	104	31	58	114	27	0	807	Bacteria{superkingdom}(99);Actinobacteria{phylum}(99);Actinobacteria{class}(99);Gaiellales{order}(99);Gaiellaceae{family}(99);Gaiella{genus}(99);uncultured_Actinomycetales_bacterium{species}(99)	Bacteria	Actinobacteria	Actinobacteria	Gaiellales	Gaiellaceae	Gaiella	uncultured_Actinomycetales_bacterium
ASV781	30	508	0	48	64	27	64	62	45	118	51	39	209	112	36	1413	Bacteria{superkingdom}(100);Acidobacteria{phylum}(100);Acidobacteria_Gp6{class}(100);{order}(100);{family}(100);Gp6{genus}(100);Unassigned{species}(0)	Bacteria	Acidobacteria	Acidobacteria_Gp6			Gp6	Unassigned
ASV783	42	49	15	68	338	31	29	28	31	303	36	108	72	46	58	1254	Bacteria{superkingdom}(100);Proteobacteria{phylum}(100);Alphaproteobacteria{class}(100);Rhizobiales{order}(100);Hyphomicrobiaceae{family}(100);Devosia{genus}(100);Unassigned{species}(0)	Bacteria	Proteobacteria	Alphaproteobacteria	Rhizobiales	Hyphomicrobiaceae	Devosia	Unassigned
ASV784	0	0	0	39	0	59	24	36	90	58	0	30	0	0	53	389	Bacteria{superkingdom}(96);Chloroflexi{phylum}(96);Chloroflexia{class}(96);Kallotenuales{order}(96);Kallotenuaceae{family}(96);Kallotenue{genus}(96);uncultured_bacterium{species}(96)	Bacteria	Chloroflexi	Chloroflexia	Kallotenuales	Kallotenuaceae	Kallotenue	uncultured_bacterium
ASV785	0	0	0	119	0	0	0	69	0	0	0	0	0	0	0	188	Bacteria{superkingdom}(97);Actinobacteria{phylum}(97);Actinobacteria{class}(97);Actinomycetales{order}(97);Micrococcaceae{family}(97);Arthrobacter{genus}(97);Unassigned{species}(0)	Bacteria	Actinobacteria	Actinobacteria	Actinomycetales	Micrococcaceae	Arthrobacter	Unassigned
ASV786	0	43	0	0	56	27	117	40	20	120	436	104	169	178	0	1310	Bacteria{superkingdom}(100);Bacteroidetes{phylum}(100);Sphingobacteriia{class}(100);Sphingobacteriales{order}(100);Chitinophagaceae{family}(100);Unassigned{genus}(0);Unassigned{species}(0)	Bacteria	Bacteroidetes	Sphingobacteriia	Sphingobacteriales	Chitinophagaceae	Unassigned	Unassigned
ASV787	0	10	0	0	0	0	0	0	0	0	7	0	0	0	0	17	Bacteria{superkingdom}(100);Proteobacteria{phylum}(100);Alphaproteobacteria{class}(100);Rhodobacterales{order}(100);Rhodobacteraceae{family}(100);Rubellimicrobium{genus}(100);uncultured_bacterium{species}(100)	Bacteria	Proteobacteria	Alphaproteobacteria	Rhodobacterales	Rhodobacteraceae	Rubellimicrobium	uncultured_bacterium
ASV788	44	39	0	0	0	30	142	20	0	0	0	0	0	45	0	320	Bacteria{superkingdom}(100);Acidobacteria{phylum}(100);Acidobacteria_Gp6{class}(100);{order}(100);{family}(100);Gp6{genus}(100);Unassigned{species}(0)	Bacteria	Acidobacteria	Acidobacteria_Gp6			Gp6	Unassigned
ASV789	0	0	0	101	0	0	0	0	50	0	0	0	0	0	20	171	Bacteria{superkingdom}(100);Acidobacteria{phylum}(100);Acidobacteria_Gp6{class}(100);{order}(100);{family}(100);Gp6{genus}(100);Unassigned{species}(0)	Bacteria	Acidobacteria	Acidobacteria_Gp6			Gp6	Unassigned
ASV790	50	0	0	80	302	28	130	139	117	159	47	59	96	90	58	1355	Bacteria{superkingdom}(99);Proteobacteria{phylum}(99);Alphaproteobacteria{class}(99);Rhizobiales{order}(99);{family}(99);{genus}(99);uncultured_Nordella_sp.{species}(99)	Bacteria	Proteobacteria	Alphaproteobacteria	Rhizobiales			uncultured_Nordella_sp.
ASV791	0	0	0	0	0	0	0	0	0	0	0	92	0	0	0	92	Bacteria{superkingdom}(100);Actinobacteria{phylum}(100);Actinobacteria{class}(100);Actinomycetales{order}(100);Pseudonocardiaceae{family}(100);Lentzea{genus}(100);Unassigned{species}(0)	Bacteria	Actinobacteria	Actinobacteria	Actinomycetales	Pseudonocardiaceae	Lentzea	Unassigned
ASV792	0	0	19	0	114	42	266	242	0	480	0	0	0	0	0	1163	Bacteria{superkingdom}(100);Proteobacteria{phylum}(100);Alphaproteobacteria{class}(100);Rhizobiales{order}(100);Xanthobacteraceae{family}(100);Pseudolabrys{genus}(100);Unassigned{species}(0)	Bacteria	Proteobacteria	Alphaproteobacteria	Rhizobiales	Xanthobacteraceae	Pseudolabrys	Unassigned
ASV793	0	32	9	15	0	88	35	153	23	42	49	22	106	29	22	625	Bacteria{superkingdom}(100);Bacteroidetes{phylum}(100);Sphingobacteriia{class}(100);Sphingobacteriales{order}(100);Chitinophagaceae{family}(100);Segetibacter{genus}(100);Unassigned{species}(0)	Bacteria	Bacteroidetes	Sphingobacteriia	Sphingobacteriales	Chitinophagaceae	Segetibacter	Unassigned
ASV794	33	0	0	0	123	88	143	106	60	181	77	232	0	100	96	1239	Bacteria{superkingdom}(96);Chloroflexi{phylum}(96);Thermomicrobia{class}(96);Sphaerobacterales{order}(96);Sphaerobacteraceae{family}(96);{genus}(96);Unassigned{species}(0)	Bacteria	Chloroflexi	Thermomicrobia	Sphaerobacterales	Sphaerobacteraceae		Unassigned
ASV796	135	58	15	89	393	77	41	24	0	15	140	0	57	0	136	1180	Bacteria{superkingdom}(86);Bacteroidetes{phylum}(86);Sphingobacteriia{class}(86);Sphingobacteriales{order}(86);Chitinophagaceae{family}(86);Niastella{genus}(86);uncultured_bacterium{species}(86)	Bacteria	Bacteroidetes	Sphingobacteriia	Sphingobacteriales	Chitinophagaceae	Niastella	uncultured_bacterium
ASV797	39	0	27	0	95	183	80	0	0	0	12	0	0	0	0	436	Bacteria{superkingdom}(85);Verrucomicrobia{phylum}(85);Opitutae{class}(85);Opitutales{order}(85);Opitutaceae{family}(85);Opitutus{genus}(85);uncultured_Opitutaceae_bacterium{species}(85)	Bacteria	Verrucomicrobia	Opitutae	Opitutales	Opitutaceae	Opitutus	uncultured_Opitutaceae_bacterium
ASV798	0	0	0	0	0	820	563	393	0	0	0	0	0	0	0	1776	Bacteria{superkingdom}(100);Proteobacteria{phylum}(100);Alphaproteobacteria{class}(100);Rhizobiales{order}(100);Methylobacteriaceae{family}(100);Microvirga{genus}(100);Unassigned{species}(0)	Bacteria	Proteobacteria	Alphaproteobacteria	Rhizobiales	Methylobacteriaceae	Microvirga	Unassigned
ASV799	0	0	0	0	0	0	0	4167	0	0	0	0	0	0	0	4167	Bacteria{superkingdom}(99);Acidobacteria{phylum}(99);Acidobacteria_Gp4{class}(99);{order}(99);{family}(99);Gp4{genus}(99);Unassigned{species}(0)	Bacteria	Acidobacteria	Acidobacteria_Gp4			Gp4	Unassigned
ASV800	0	0	0	0	9	0	0	0	0	0	0	0	0	0	0	9	Bacteria{superkingdom}(100);Cyanobacteria/Chloroplast{phylum}(100);Cyanobacteria{class}(100);{order}(100);Family_I{family}(100);GpI{genus}(100);Microcoleus_cf._chthonoplastes_Es_Yyy1100{species}(100)	Bacteria	Cyanobacteria/Chloroplast	Cyanobacteria		Family_I	GpI	Microcoleus_cf._chthonoplastes_Es_Yyy1100
ASV801	0	0	0	73	0	0	0	0	0	0	0	0	0	0	0	73	Bacteria{superkingdom}(100);Actinobacteria{phylum}(100);Actinobacteria{class}(100);Actinomycetales{order}(100);Streptomycetaceae{family}(100);Streptomyces{genus}(100);Unassigned{species}(0)	Bacteria	Actinobacteria	Actinobacteria	Actinomycetales	Streptomycetaceae	Streptomyces	Unassigned
ASV802	0	173	0	0	0	0	0	68	31	55	11	0	0	0	0	338	Bacteria{superkingdom}(89);Actinobacteria{phylum}(89);Actinobacteria{class}(89);Acidimicrobiales{order}(89);Acidimicrobineae_incertae_sedis{family}(89);Aciditerrimonas{genus}(89);uncultured_bacterium{species}(89)	Bacteria	Actinobacteria	Actinobacteria	Acidimicrobiales	Acidimicrobineae_incertae_sedis	Aciditerrimonas	uncultured_bacterium
ASV803	0	167	0	0	0	0	0	12	10	71	0	68	39	172	12	551	Bacteria{superkingdom}(100);Chloroflexi{phylum}(100);Chloroflexia{class}(100);Kallotenuales{order}(100);Kallotenuaceae{family}(100);Kallotenue{genus}(100);uncultured_bacterium{species}(100)	Bacteria	Chloroflexi	Chloroflexia	Kallotenuales	Kallotenuaceae	Kallotenue	uncultured_bacterium
ASV804	0	0	0	162	0	0	79	61	85	118	203	0	0	0	0	708	Bacteria{superkingdom}(100);Proteobacteria{phylum}(100);Gammaproteobacteria{class}(100);Xanthomonadales{order}(100);Sinobacteraceae{family}(100);Steroidobacter{genus}(100);Unassigned{species}(0)	Bacteria	Proteobacteria	Gammaproteobacteria	Xanthomonadales	Sinobacteraceae	Steroidobacter	Unassigned
ASV805	0	0	0	0	0	0	22	35	0	0	0	0	0	0	0	57	Bacteria{superkingdom}(100);Acidobacteria{phylum}(100);Acidobacteria_Gp4{class}(100);{order}(100);{family}(100);Gp4{genus}(100);Unassigned{species}(0)	Bacteria	Acidobacteria	Acidobacteria_Gp4			Gp4	Unassigned
ASV806	0	93	0	0	236	0	0	14	0	0	0	0	0	0	0	343	Bacteria{superkingdom}(100);Acidobacteria{phylum}(100);Acidobacteria_Gp4{class}(100);{order}(100);{family}(100);Gp4{genus}(100);Unassigned{species}(0)	Bacteria	Acidobacteria	Acidobacteria_Gp4			Gp4	Unassigned
ASV807	0	0	0	0	0	65	240	0	0	98	4	0	4	0	9	420	Bacteria{superkingdom}(95);Bacteroidetes{phylum}(95);Sphingobacteriia{class}(95);Sphingobacteriales{order}(95);Chitinophagaceae{family}(95);{genus}(95);Unassigned{species}(0)	Bacteria	Bacteroidetes	Sphingobacteriia	Sphingobacteriales	Chitinophagaceae		Unassigned
ASV809	83	1041	97	0	131	0	0	74	0	152	0	0	0	66	10	1654	Bacteria{superkingdom}(82);Actinobacteria{phylum}(82);Actinobacteria{class}(82);Solirubrobacterales{order}(82);Conexibacteraceae{family}(82);Conexibacter{genus}(82);uncultured_bacterium{species}(82)	Bacteria	Actinobacteria	Actinobacteria	Solirubrobacterales	Conexibacteraceae	Conexibacter	uncultured_bacterium
ASV810	0	70	0	44	0	0	0	21	0	79	0	56	0	38	0	308	Bacteria{superkingdom}(97);Actinobacteria{phylum}(97);Actinobacteria{class}(97);Actinomycetales{order}(97);Mycobacteriaceae{family}(97);Mycobacterium{genus}(97);Unassigned{species}(0)	Bacteria	Actinobacteria	Actinobacteria	Actinomycetales	Mycobacteriaceae	Mycobacterium	Unassigned
ASV811	39	0	0	25	126	0	59	0	35	35	19	60	17	36	53	504	Bacteria{superkingdom}(100);candidate_division_WPS-1{phylum}(100);{class}(100);{order}(100);{family}(100);WPS-1_genera_incertae_sedis{genus}(100);Unassigned{species}(0)	Bacteria	candidate_division_WPS-1				WPS-1_genera_incertae_sedis	Unassigned
ASV812	88	45	79	181	351	0	16	0	15	27	0	16	0	29	8	855	Bacteria{superkingdom}(86);Actinobacteria{phylum}(86);Actinobacteria{class}(86);Acidimicrobiales{order}(86);{family}(86);{genus}(86);uncultured_Rhodococcus_sp.{species}(86)	Bacteria	Actinobacteria	Actinobacteria	Acidimicrobiales			uncultured_Rhodococcus_sp.
ASV813	0	0	0	219	272	0	0	13	0	38	24	29	0	35	14	644	Bacteria{superkingdom}(91);Proteobacteria{phylum}(91);Gammaproteobacteria{class}(91);Xanthomonadales{order}(91);Sinobacteraceae{family}(91);Steroidobacter{genus}(91);Unassigned{species}(0)	Bacteria	Proteobacteria	Gammaproteobacteria	Xanthomonadales	Sinobacteraceae	Steroidobacter	Unassigned
ASV814	44	110	0	145	0	50	0	0	0	0	0	0	133	0	0	482	Bacteria{superkingdom}(92);Actinobacteria{phylum}(92);Actinobacteria{class}(92);Actinomycetales{order}(92);Nocardioidaceae{family}(92);Marmoricola{genus}(92);Unassigned{species}(0)	Bacteria	Actinobacteria	Actinobacteria	Actinomycetales	Nocardioidaceae	Marmoricola	Unassigned
ASV816	38	0	64	128	178	198	133	130	275	181	101	31	0	29	128	1614	Bacteria{superkingdom}(97);Planctomycetes{phylum}(97);Planctomycetia{class}(97);Planctomycetales{order}(97);Planctomycetaceae{family}(97);Pirellula{genus}(97);uncultured_Firmicutes_bacterium{species}(97)	Bacteria	Planctomycetes	Planctomycetia	Planctomycetales	Planctomycetaceae	Pirellula	uncultured_Firmicutes_bacterium
ASV817	3	41	0	0	100	0	0	0	0	46	0	14	51	25	0	280	Bacteria{superkingdom}(100);Actinobacteria{phylum}(100);Actinobacteria{class}(100);Actinomycetales{order}(100);Nocardioidaceae{family}(100);Nocardioides{genus}(100);Unassigned{species}(0)	Bacteria	Actinobacteria	Actinobacteria	Actinomycetales	Nocardioidaceae	Nocardioides	Unassigned
ASV818	0	0	0	6	0	0	0	0	0	0	0	0	0	0	0	6	Bacteria{superkingdom}(100);Acidobacteria{phylum}(100);Acidobacteria_Gp7{class}(100);{order}(100);{family}(100);Gp7{genus}(100);Unassigned{species}(0)	Bacteria	Acidobacteria	Acidobacteria_Gp7			Gp7	Unassigned
ASV819	0	0	0	21	0	0	0	0	36	0	0	12	0	0	0	69	Bacteria{superkingdom}(100);Bacteroidetes{phylum}(100);Cytophagia{class}(100);Cytophagales{order}(100);{family}(100);Ohtaekwangia{genus}(100);Unassigned{species}(0)	Bacteria	Bacteroidetes	Cytophagia	Cytophagales		Ohtaekwangia	Unassigned
ASV820	0	52	0	0	0	18	0	37	12	34	0	33	32	18	16	252	Bacteria{superkingdom}(100);Proteobacteria{phylum}(100);Alphaproteobacteria{class}(100);Rhizobiales{order}(100);Unassigned{family}(0);Unassigned{genus}(0);Unassigned{species}(0)	Bacteria	Proteobacteria	Alphaproteobacteria	Rhizobiales	Unassigned	Unassigned	Unassigned
ASV821	41	36	98	475	418	0	0	0	0	0	7	12	24	20	0	1131	Bacteria{superkingdom}(100);Bacteroidetes{phylum}(100);Sphingobacteriia{class}(100);Sphingobacteriales{order}(100);Chitinophagaceae{family}(100);Ferruginibacter{genus}(100);Unassigned{species}(0)	Bacteria	Bacteroidetes	Sphingobacteriia	Sphingobacteriales	Chitinophagaceae	Ferruginibacter	Unassigned
ASV822	10	0	0	0	0	0	0	0	9	0	0	545	0	13	0	577	Bacteria{superkingdom}(100);Actinobacteria{phylum}(100);Actinobacteria{class}(100);Actinomycetales{order}(100);Glycomycetaceae{family}(100);Glycomyces{genus}(100);Unassigned{species}(0)	Bacteria	Actinobacteria	Actinobacteria	Actinomycetales	Glycomycetaceae	Glycomyces	Unassigned
ASV823	0	0	0	0	0	0	0	0	0	64	0	291	140	65	0	560	Bacteria{superkingdom}(100);Chloroflexi{phylum}(100);Thermomicrobia{class}(100);Unassigned{order}(0);Unassigned{family}(0);Unassigned{genus}(0);Unassigned{species}(0)	Bacteria	Chloroflexi	Thermomicrobia	Unassigned	Unassigned	Unassigned	Unassigned
ASV824	0	0	0	0	0	0	0	0	0	0	0	41	87	301	0	429	Bacteria{superkingdom}(100);Bacteroidetes{phylum}(100);Sphingobacteriia{class}(100);Sphingobacteriales{order}(100);Chitinophagaceae{family}(100);Unassigned{genus}(0);Unassigned{species}(0)	Bacteria	Bacteroidetes	Sphingobacteriia	Sphingobacteriales	Chitinophagaceae	Unassigned	Unassigned
ASV825	68	0	0	0	166	77	0	33	47	0	0	0	183	41	203	818	Bacteria{superkingdom}(100);Actinobacteria{phylum}(100);Unassigned{class}(0);Unassigned{order}(0);Unassigned{family}(0);Unassigned{genus}(0);Unassigned{species}(0)	Bacteria	Actinobacteria	Unassigned	Unassigned	Unassigned	Unassigned	Unassigned
ASV827	49	0	57	44	56	0	0	0	227	0	129	132	306	0	22	1022	Bacteria{superkingdom}(95);Actinobacteria{phylum}(95);Actinobacteria{class}(95);Solirubrobacterales{order}(95);{family}(95);{genus}(95);Unassigned{species}(0)	Bacteria	Actinobacteria	Actinobacteria	Solirubrobacterales			Unassigned
ASV828	203	0	356	27	467	0	9	0	0	0	121	0	0	10	0	1193	Bacteria{superkingdom}(82);{phylum}(82);{class}(82);{order}(82);{family}(82);{genus}(82);uncultured_Gemmatimonadetes_bacterium{species}(82)	Bacteria						uncultured_Gemmatimonadetes_bacterium
ASV829	51	93	15	88	266	32	35	12	37	0	15	0	75	36	57	812	Bacteria{superkingdom}(92);Proteobacteria{phylum}(92);Alphaproteobacteria{class}(92);Rhizobiales{order}(92);Hyphomicrobiaceae{family}(92);Devosia{genus}(92);Unassigned{species}(0)	Bacteria	Proteobacteria	Alphaproteobacteria	Rhizobiales	Hyphomicrobiaceae	Devosia	Unassigned
ASV830	131	806	122	0	157	0	0	0	0	0	0	0	0	0	0	1216	Bacteria{superkingdom}(91);Actinobacteria{phylum}(91);Actinobacteria{class}(91);Solirubrobacterales{order}(91);Conexibacteraceae{family}(91);Conexibacter{genus}(91);uncultured_Thermoleophilum_sp.{species}(91)	Bacteria	Actinobacteria	Actinobacteria	Solirubrobacterales	Conexibacteraceae	Conexibacter	uncultured_Thermoleophilum_sp.
ASV831	40	54	31	86	278	0	0	18	131	0	77	0	0	12	50	777	Bacteria{superkingdom}(100);Bacteroidetes{phylum}(100);Cytophagia{class}(100);Cytophagales{order}(100);{family}(100);Ohtaekwangia{genus}(100);Unassigned{species}(0)	Bacteria	Bacteroidetes	Cytophagia	Cytophagales		Ohtaekwangia	Unassigned
ASV832	0	0	0	0	0	0	0	0	0	0	0	43	18	21	0	82	Bacteria{superkingdom}(98);Acidobacteria{phylum}(98);Acidobacteria_Gp3{class}(98);{order}(98);{family}(98);Gp3{genus}(98);Unassigned{species}(0)	Bacteria	Acidobacteria	Acidobacteria_Gp3			Gp3	Unassigned
ASV833	0	495	0	41	0	29	66	30	0	410	0	153	10	34	120	1388	Bacteria{superkingdom}(85);Chloroflexi{phylum}(85);{class}(85);{order}(85);{family}(85);{genus}(85);Unassigned{species}(0)	Bacteria	Chloroflexi					Unassigned
ASV834	89	0	0	0	0	0	0	0	0	0	0	0	0	0	0	89	Bacteria{superkingdom}(84);Chloroflexi{phylum}(84);Chloroflexia{class}(84);Kallotenuales{order}(84);Kallotenuaceae{family}(84);Kallotenue{genus}(84);uncultured_bacterium{species}(84)	Bacteria	Chloroflexi	Chloroflexia	Kallotenuales	Kallotenuaceae	Kallotenue	uncultured_bacterium
ASV835	13	56	14	64	72	50	89	40	32	71	47	38	99	0	17	702	Bacteria{superkingdom}(90);Chloroflexi{phylum}(90);{class}(90);{order}(90);{family}(90);{genus}(90);Unassigned{species}(0)	Bacteria	Chloroflexi					Unassigned
ASV838	0	0	0	0	64	0	0	0	0	0	0	0	0	0	0	64	Bacteria{superkingdom}(100);Bacteroidetes{phylum}(100);Sphingobacteriia{class}(100);Sphingobacteriales{order}(100);Chitinophagaceae{family}(100);Chitinophaga{genus}(100);Unassigned{species}(0)	Bacteria	Bacteroidetes	Sphingobacteriia	Sphingobacteriales	Chitinophagaceae	Chitinophaga	Unassigned
ASV839	0	0	0	0	0	0	0	0	0	0	0	11	0	7	0	18	Bacteria{superkingdom}(98);Chloroflexi{phylum}(98);Thermomicrobia{class}(98);{order}(98);{family}(98);{genus}(98);uncultured_bacterium{species}(98)	Bacteria	Chloroflexi	Thermomicrobia				uncultured_bacterium
ASV841	0	0	0	0	0	0	0	33	0	0	0	0	0	0	0	33	Bacteria{superkingdom}(97);Actinobacteria{phylum}(97);Actinobacteria{class}(97);Solirubrobacterales{order}(97);Conexibacteraceae{family}(97);Conexibacter{genus}(97);uncultured_Thermoleophilum_sp.{species}(97)	Bacteria	Actinobacteria	Actinobacteria	Solirubrobacterales	Conexibacteraceae	Conexibacter	uncultured_Thermoleophilum_sp.
ASV842	43	392	30	336	61	0	0	25	0	0	0	0	0	0	0	887	Bacteria{superkingdom}(80);Acidobacteria{phylum}(80);Acidobacteria_Gp10{class}(80);{order}(80);{family}(80);Gp10{genus}(80);uncultured_Pelobacter_sp.{species}(80)	Bacteria	Acidobacteria	Acidobacteria_Gp10			Gp10	uncultured_Pelobacter_sp.
ASV843	0	0	0	55	0	0	0	0	12	148	0	0	0	22	0	237	Bacteria{superkingdom}(88);Proteobacteria{phylum}(88);Betaproteobacteria{class}(88);Burkholderiales{order}(88);Oxalobacteraceae{family}(88);Massilia{genus}(88);Massilia_dura{species}(88)	Bacteria	Proteobacteria	Betaproteobacteria	Burkholderiales	Oxalobacteraceae	Massilia	Massilia_dura
ASV847	0	0	0	0	0	0	0	0	0	13	0	0	0	0	0	13	Bacteria{superkingdom}(83);Bacteroidetes{phylum}(83);Cytophagia{class}(83);Cytophagales{order}(83);Cytophagaceae{family}(83);Rhodocytophaga{genus}(83);uncultured_Flexibacteraceae_bacterium{species}(83)	Bacteria	Bacteroidetes	Cytophagia	Cytophagales	Cytophagaceae	Rhodocytophaga	uncultured_Flexibacteraceae_bacterium
ASV849	0	26	32	35	131	0	150	30	30	0	0	0	0	0	0	434	Bacteria{superkingdom}(100);Acidobacteria{phylum}(100);Acidobacteria_Gp6{class}(100);{order}(100);{family}(100);Gp6{genus}(100);Unassigned{species}(0)	Bacteria	Acidobacteria	Acidobacteria_Gp6			Gp6	Unassigned
ASV850	0	0	0	0	0	0	0	0	0	0	0	28	0	0	0	28	Bacteria{superkingdom}(86);Chloroflexi{phylum}(86);Chloroflexia{class}(86);Kallotenuales{order}(86);Kallotenuaceae{family}(86);Kallotenue{genus}(86);uncultured_endolithic_bacterium{species}(86)	Bacteria	Chloroflexi	Chloroflexia	Kallotenuales	Kallotenuaceae	Kallotenue	uncultured_endolithic_bacterium
ASV851	43	98	36	27	17	5	33	36	24	138	0	0	0	30	7	494	Bacteria{superkingdom}(100);Planctomycetes{phylum}(100);Planctomycetia{class}(100);Planctomycetales{order}(100);Planctomycetaceae{family}(100);{genus}(100);uncultured_Blastopirellula_sp.{species}(100)	Bacteria	Planctomycetes	Planctomycetia	Planctomycetales	Planctomycetaceae		uncultured_Blastopirellula_sp.
ASV852	0	26	0	0	0	0	0	0	0	0	0	31	8	25	0	90	Bacteria{superkingdom}(100);Proteobacteria{phylum}(100);Alphaproteobacteria{class}(100);Unassigned{order}(0);Unassigned{family}(0);Unassigned{genus}(0);Unassigned{species}(0)	Bacteria	Proteobacteria	Alphaproteobacteria	Unassigned	Unassigned	Unassigned	Unassigned
ASV853	27	0	0	0	89	122	115	52	40	0	0	0	0	0	0	445	Bacteria{superkingdom}(92);Acidobacteria{phylum}(92);Acidobacteria_Gp3{class}(92);{order}(92);{family}(92);{genus}(92);uncultured_Candidatus_Solibacter_sp.{species}(92)	Bacteria	Acidobacteria	Acidobacteria_Gp3				uncultured_Candidatus_Solibacter_sp.
ASV854	0	0	0	0	0	47	0	13	0	0	65	17	12	34	93	281	Bacteria{superkingdom}(100);Bacteroidetes{phylum}(100);Sphingobacteriia{class}(100);Sphingobacteriales{order}(100);Chitinophagaceae{family}(100);Chitinophaga{genus}(100);Unassigned{species}(0)	Bacteria	Bacteroidetes	Sphingobacteriia	Sphingobacteriales	Chitinophagaceae	Chitinophaga	Unassigned
ASV855	553	37	1232	0	514	30	0	157	59	0	16	0	0	0	0	2598	Bacteria{superkingdom}(99);Firmicutes{phylum}(99);Bacilli{class}(99);Bacillales{order}(99);Bacillaceae_1{family}(99);Bacillus{genus}(99);Unassigned{species}(0)	Bacteria	Firmicutes	Bacilli	Bacillales	Bacillaceae_1	Bacillus	Unassigned
ASV857	0	0	40	0	0	0	70	46	0	0	0	7	0	0	0	163	Bacteria{superkingdom}(99);Chloroflexi{phylum}(99);Chloroflexia{class}(99);{order}(99);{family}(99);{genus}(99);Unassigned{species}(0)	Bacteria	Chloroflexi	Chloroflexia				Unassigned
ASV858	18	77	0	68	59	0	0	27	0	29	0	8	0	0	0	286	Bacteria{superkingdom}(100);Proteobacteria{phylum}(100);Deltaproteobacteria{class}(100);Myxococcales{order}(100);Unassigned{family}(0);Unassigned{genus}(0);Unassigned{species}(0)	Bacteria	Proteobacteria	Deltaproteobacteria	Myxococcales	Unassigned	Unassigned	Unassigned
ASV860	0	0	0	0	0	54	79	59	16	29	8	24	45	38	7	359	Bacteria{superkingdom}(100);Actinobacteria{phylum}(100);Actinobacteria{class}(100);Actinomycetales{order}(100);Microbacteriaceae{family}(100);Unassigned{genus}(0);Unassigned{species}(0)	Bacteria	Actinobacteria	Actinobacteria	Actinomycetales	Microbacteriaceae	Unassigned	Unassigned
ASV861	27	345	0	1615	109	0	0	13	0	0	0	30	0	0	0	2139	Bacteria{superkingdom}(89);Actinobacteria{phylum}(89);Actinobacteria{class}(89);Actinomycetales{order}(89);Nocardioidaceae{family}(89);Nocardioides{genus}(89);Nocardioides_albus{species}(89)	Bacteria	Actinobacteria	Actinobacteria	Actinomycetales	Nocardioidaceae	Nocardioides	Nocardioides_albus
ASV862	22	0	37	37	51	19	19	60	48	40	0	0	50	0	0	383	Bacteria{superkingdom}(100);Actinobacteria{phylum}(100);Actinobacteria{class}(100);Actinomycetales{order}(100);Nocardioidaceae{family}(100);Nocardioides{genus}(100);Unassigned{species}(0)	Bacteria	Actinobacteria	Actinobacteria	Actinomycetales	Nocardioidaceae	Nocardioides	Unassigned
ASV863	31	0	48	189	163	65	0	0	17	18	69	0	0	0	108	708	Bacteria{superkingdom}(100);Armatimonadetes{phylum}(100);Chthonomonadetes{class}(100);Chthonomonadales{order}(100);Chthonomonadaceae{family}(100);Chthonomonas/Armatimonadetes_gp3{genus}(100);Unassigned{species}(0)	Bacteria	Armatimonadetes	Chthonomonadetes	Chthonomonadales	Chthonomonadaceae	Chthonomonas/Armatimonadetes_gp3	Unassigned
ASV864	0	0	0	0	0	0	0	42	0	78	0	0	0	0	0	120	Bacteria{superkingdom}(91);Acidobacteria{phylum}(91);Acidobacteria_Gp16{class}(91);{order}(91);{family}(91);Gp16{genus}(91);Unassigned{species}(0)	Bacteria	Acidobacteria	Acidobacteria_Gp16			Gp16	Unassigned
ASV865	39	147	32	185	570	112	142	77	45	94	0	59	91	57	43	1693	Bacteria{superkingdom}(100);Bacteroidetes{phylum}(100);Sphingobacteriia{class}(100);Sphingobacteriales{order}(100);Chitinophagaceae{family}(100);Flavisolibacter{genus}(100);Unassigned{species}(0)	Bacteria	Bacteroidetes	Sphingobacteriia	Sphingobacteriales	Chitinophagaceae	Flavisolibacter	Unassigned
ASV867	0	0	98	0	75	0	0	0	107	0	0	0	0	0	33	313	Bacteria{superkingdom}(81);Firmicutes{phylum}(81);Bacilli{class}(81);Bacillales{order}(81);Bacillaceae_1{family}(81);Bacillus{genus}(81);Bacillus_funiculus{species}(81)	Bacteria	Firmicutes	Bacilli	Bacillales	Bacillaceae_1	Bacillus	Bacillus_funiculus
ASV869	39	106	0	20	381	0	37	50	0	48	33	54	0	33	42	843	Bacteria{superkingdom}(93);Planctomycetes{phylum}(93);Planctomycetia{class}(93);Planctomycetales{order}(93);Planctomycetaceae{family}(93);{genus}(93);Planctomyces_sp.{species}(93)	Bacteria	Planctomycetes	Planctomycetia	Planctomycetales	Planctomycetaceae		Planctomyces_sp.
ASV871	178	0	674	48	152	0	0	0	14	0	22	0	0	0	0	1088	Bacteria{superkingdom}(94);Bacteroidetes{phylum}(94);Sphingobacteriia{class}(94);Sphingobacteriales{order}(94);Chitinophagaceae{family}(94);Taibaiella{genus}(94);uncultured_bacterium{species}(94)	Bacteria	Bacteroidetes	Sphingobacteriia	Sphingobacteriales	Chitinophagaceae	Taibaiella	uncultured_bacterium
ASV872	38	0	0	177	109	0	0	0	0	0	0	0	0	0	0	324	Bacteria{superkingdom}(100);Bacteroidetes{phylum}(100);Sphingobacteriia{class}(100);Sphingobacteriales{order}(100);Chitinophagaceae{family}(100);Niastella{genus}(100);Unassigned{species}(0)	Bacteria	Bacteroidetes	Sphingobacteriia	Sphingobacteriales	Chitinophagaceae	Niastella	Unassigned
ASV873	0	0	0	0	0	0	0	0	20	0	0	0	0	0	0	20	Bacteria{superkingdom}(98);Actinobacteria{phylum}(98);Actinobacteria{class}(98);Acidimicrobiales{order}(98);Acidimicrobineae_incertae_sedis{family}(98);Aciditerrimonas{genus}(98);Unassigned{species}(0)	Bacteria	Actinobacteria	Actinobacteria	Acidimicrobiales	Acidimicrobineae_incertae_sedis	Aciditerrimonas	Unassigned
ASV874	0	36	0	0	0	0	0	0	0	0	0	0	0	0	0	36	Bacteria{superkingdom}(92);Chloroflexi{phylum}(92);Chloroflexia{class}(92);Kallotenuales{order}(92);Kallotenuaceae{family}(92);Kallotenue{genus}(92);uncultured_bacterium{species}(92)	Bacteria	Chloroflexi	Chloroflexia	Kallotenuales	Kallotenuaceae	Kallotenue	uncultured_bacterium
ASV875	75	669	142	0	0	126	117	0	0	280	66	0	0	0	0	1475	Bacteria{superkingdom}(93);Actinobacteria{phylum}(93);Actinobacteria{class}(93);Acidimicrobiales{order}(93);Acidimicrobineae_incertae_sedis{family}(93);Aciditerrimonas{genus}(93);uncultured_Acidimicrobiales_bacterium{species}(93)	Bacteria	Actinobacteria	Actinobacteria	Acidimicrobiales	Acidimicrobineae_incertae_sedis	Aciditerrimonas	uncultured_Acidimicrobiales_bacterium
ASV876	0	64	0	8	0	0	19	13	11	21	0	0	15	0	0	151	Bacteria{superkingdom}(100);{phylum}(100);{class}(100);{order}(100);{family}(100);{genus}(100);uncultured_candidate_division_WYO_bacterium{species}(100)	Bacteria						uncultured_candidate_division_WYO_bacterium
ASV877	0	219	0	69	89	45	215	0	0	135	48	45	144	100	74	1183	Bacteria{superkingdom}(100);Proteobacteria{phylum}(100);Betaproteobacteria{class}(100);Burkholderiales{order}(100);Comamonadaceae{family}(100);Unassigned{genus}(0);Unassigned{species}(0)	Bacteria	Proteobacteria	Betaproteobacteria	Burkholderiales	Comamonadaceae	Unassigned	Unassigned
ASV878	0	0	0	0	0	0	0	0	0	0	0	69	0	0	0	69	Bacteria{superkingdom}(100);Proteobacteria{phylum}(100);Alphaproteobacteria{class}(100);Sphingomonadales{order}(100);Sphingomonadaceae{family}(100);Sphingomonas{genus}(100);Unassigned{species}(0)	Bacteria	Proteobacteria	Alphaproteobacteria	Sphingomonadales	Sphingomonadaceae	Sphingomonas	Unassigned
ASV879	165	1207	267	0	0	36	0	0	77	0	0	0	0	144	97	1993	Bacteria{superkingdom}(100);Chloroflexi{phylum}(100);{class}(100);{order}(100);{family}(100);{genus}(100);uncultured_Anaerolineae_bacterium{species}(100)	Bacteria	Chloroflexi					uncultured_Anaerolineae_bacterium
ASV880	44	0	8	93	0	134	43	20	73	111	0	0	0	0	0	526	Bacteria{superkingdom}(100);Unassigned{phylum}(0);Unassigned{class}(0);Unassigned{order}(0);Unassigned{family}(0);Unassigned{genus}(0);Unassigned{species}(0)	Bacteria	Unassigned	Unassigned	Unassigned	Unassigned	Unassigned	Unassigned
ASV881	0	0	0	0	0	0	0	0	0	0	0	0	0	277	0	277	Bacteria{superkingdom}(99);Proteobacteria{phylum}(99);Gammaproteobacteria{class}(99);Pseudomonadales{order}(99);Pseudomonadaceae{family}(99);Pseudomonas{genus}(99);Unassigned{species}(0)	Bacteria	Proteobacteria	Gammaproteobacteria	Pseudomonadales	Pseudomonadaceae	Pseudomonas	Unassigned
ASV882	73	300	64	0	117	0	0	0	0	0	0	0	0	0	0	554	Bacteria{superkingdom}(100);Actinobacteria{phylum}(100);Actinobacteria{class}(100);Actinomycetales{order}(100);Pseudonocardiaceae{family}(100);Pseudonocardia{genus}(100);Unassigned{species}(0)	Bacteria	Actinobacteria	Actinobacteria	Actinomycetales	Pseudonocardiaceae	Pseudonocardia	Unassigned
ASV883	34	314	0	143	67	0	0	0	0	0	0	0	0	0	0	558	Bacteria{superkingdom}(82);Actinobacteria{phylum}(82);Actinobacteria{class}(82);Actinomycetales{order}(82);Unassigned{family}(0);Unassigned{genus}(0);Unassigned{species}(0)	Bacteria	Actinobacteria	Actinobacteria	Actinomycetales	Unassigned	Unassigned	Unassigned
ASV884	24	87	39	110	302	68	27	79	15	0	0	0	0	0	27	778	Bacteria{superkingdom}(100);Proteobacteria{phylum}(100);Alphaproteobacteria{class}(100);Rhodospirillales{order}(100);{family}(100);Reyranella{genus}(100);Unassigned{species}(0)	Bacteria	Proteobacteria	Alphaproteobacteria	Rhodospirillales		Reyranella	Unassigned
ASV885	0	0	0	0	0	0	0	0	28	746	0	452	0	0	12	1238	Bacteria{superkingdom}(100);Actinobacteria{phylum}(100);Actinobacteria{class}(100);Actinomycetales{order}(100);Unassigned{family}(0);Unassigned{genus}(0);Unassigned{species}(0)	Bacteria	Actinobacteria	Actinobacteria	Actinomycetales	Unassigned	Unassigned	Unassigned
ASV886	117	0	81	0	154	0	0	0	66	73	78	79	0	96	69	813	Bacteria{superkingdom}(85);Actinobacteria{phylum}(85);Actinobacteria{class}(85);Solirubrobacterales{order}(85);Solirubrobacteraceae{family}(85);Solirubrobacter{genus}(85);uncultured_bacterium{species}(85)	Bacteria	Actinobacteria	Actinobacteria	Solirubrobacterales	Solirubrobacteraceae	Solirubrobacter	uncultured_bacterium
ASV887	0	0	0	0	0	0	0	0	0	19	0	0	0	22	0	41	Bacteria{superkingdom}(85);Actinobacteria{phylum}(85);Actinobacteria{class}(85);Rubrobacterales{order}(85);Rubrobacteraceae{family}(85);Rubrobacter{genus}(85);uncultured_bacterium{species}(85)	Bacteria	Actinobacteria	Actinobacteria	Rubrobacterales	Rubrobacteraceae	Rubrobacter	uncultured_bacterium
ASV888	16	34	15	78	160	0	95	18	39	76	27	0	0	0	25	583	Bacteria{superkingdom}(95);Proteobacteria{phylum}(95);Alphaproteobacteria{class}(95);Rhizobiales{order}(95);{family}(95);{genus}(95);uncultured_Methylocystis_sp.{species}(95)	Bacteria	Proteobacteria	Alphaproteobacteria	Rhizobiales			uncultured_Methylocystis_sp.
ASV889	79	0	0	34	0	0	0	0	0	0	0	0	0	0	0	113	Bacteria{superkingdom}(86);Chloroflexi{phylum}(86);Chloroflexia{class}(86);{order}(86);{family}(86);{genus}(86);uncultured_Chloroflexi_bacterium{species}(86)	Bacteria	Chloroflexi	Chloroflexia				uncultured_Chloroflexi_bacterium
ASV892	0	0	0	149	290	0	0	0	58	58	181	32	0	0	0	768	Bacteria{superkingdom}(85);Proteobacteria{phylum}(85);Betaproteobacteria{class}(85);{order}(85);{family}(85);{genus}(85);uncultured_Alcaligenaceae_bacterium{species}(85)	Bacteria	Proteobacteria	Betaproteobacteria				uncultured_Alcaligenaceae_bacterium
ASV893	0	0	0	39	0	0	0	0	0	0	0	0	0	0	0	39	Bacteria{superkingdom}(100);Bacteroidetes{phylum}(100);Sphingobacteriia{class}(100);Sphingobacteriales{order}(100);Chitinophagaceae{family}(100);{genus}(100);uncultured_Cytophaga_sp.{species}(100)	Bacteria	Bacteroidetes	Sphingobacteriia	Sphingobacteriales	Chitinophagaceae		uncultured_Cytophaga_sp.
ASV894	26	71	40	91	22	62	194	95	22	64	33	76	46	84	67	993	Bacteria{superkingdom}(86);Chloroflexi{phylum}(86);Thermomicrobia{class}(86);Sphaerobacterales{order}(86);Sphaerobacteraceae{family}(86);{genus}(86);Unassigned{species}(0)	Bacteria	Chloroflexi	Thermomicrobia	Sphaerobacterales	Sphaerobacteraceae		Unassigned
ASV895	0	0	18	89	0	0	0	0	0	24	0	31	0	0	0	162	Bacteria{superkingdom}(100);Bacteroidetes{phylum}(100);Sphingobacteriia{class}(100);Sphingobacteriales{order}(100);Chitinophagaceae{family}(100);Niastella{genus}(100);Unassigned{species}(0)	Bacteria	Bacteroidetes	Sphingobacteriia	Sphingobacteriales	Chitinophagaceae	Niastella	Unassigned
ASV897	159	0	46	138	89	0	0	13	176	56	0	0	12	0	0	689	Bacteria{superkingdom}(100);Firmicutes{phylum}(100);Bacilli{class}(100);Bacillales{order}(100);Unassigned{family}(0);Unassigned{genus}(0);Unassigned{species}(0)	Bacteria	Firmicutes	Bacilli	Bacillales	Unassigned	Unassigned	Unassigned
ASV898	67	547	55	0	0	0	0	0	0	109	0	121	268	0	0	1167	Bacteria{superkingdom}(88);Actinobacteria{phylum}(88);Actinobacteria{class}(88);Actinomycetales{order}(88);Nocardioidaceae{family}(88);Marmoricola{genus}(88);Unassigned{species}(0)	Bacteria	Actinobacteria	Actinobacteria	Actinomycetales	Nocardioidaceae	Marmoricola	Unassigned
ASV899	0	0	0	0	0	0	0	0	0	0	0	17	0	0	0	17	Bacteria{superkingdom}(100);Bacteroidetes{phylum}(100);Cytophagia{class}(100);Cytophagales{order}(100);Cytophagaceae{family}(100);Adhaeribacter{genus}(100);Unassigned{species}(0)	Bacteria	Bacteroidetes	Cytophagia	Cytophagales	Cytophagaceae	Adhaeribacter	Unassigned
ASV900	0	0	30	68	59	0	0	16	0	0	0	0	0	0	0	173	Bacteria{superkingdom}(100);Unassigned{phylum}(0);Unassigned{class}(0);Unassigned{order}(0);Unassigned{family}(0);Unassigned{genus}(0);Unassigned{species}(0)	Bacteria	Unassigned	Unassigned	Unassigned	Unassigned	Unassigned	Unassigned
ASV903	0	0	0	18	186	0	0	0	0	0	0	0	0	0	0	204	Bacteria{superkingdom}(97);Planctomycetes{phylum}(97);Planctomycetia{class}(97);Planctomycetales{order}(97);Planctomycetaceae{family}(97);{genus}(97);Planctomyces_sp.{species}(97)	Bacteria	Planctomycetes	Planctomycetia	Planctomycetales	Planctomycetaceae		Planctomyces_sp.
ASV904	0	0	0	0	92	0	0	0	0	74	0	37	52	54	0	309	Bacteria{superkingdom}(100);Actinobacteria{phylum}(100);Actinobacteria{class}(100);Actinomycetales{order}(100);Nocardioidaceae{family}(100);Nocardioides{genus}(100);Unassigned{species}(0)	Bacteria	Actinobacteria	Actinobacteria	Actinomycetales	Nocardioidaceae	Nocardioides	Unassigned
ASV905	29	0	0	0	0	69	87	149	67	63	27	64	0	0	63	618	Bacteria{superkingdom}(97);Chloroflexi{phylum}(97);Chloroflexia{class}(97);{order}(97);{family}(97);{genus}(97);uncultured_bacterium{species}(97)	Bacteria	Chloroflexi	Chloroflexia				uncultured_bacterium
ASV907	77	193	128	91	228	57	33	11	70	63	107	68	0	0	31	1157	Bacteria{superkingdom}(86);Chloroflexi{phylum}(86);Anaerolineae{class}(86);Anaerolineales{order}(86);Anaerolineaceae{family}(86);Unassigned{genus}(0);Unassigned{species}(0)	Bacteria	Chloroflexi	Anaerolineae	Anaerolineales	Anaerolineaceae	Unassigned	Unassigned
ASV908	0	66	0	0	0	0	0	0	0	0	0	37	0	21	10	134	Bacteria{superkingdom}(96);Actinobacteria{phylum}(96);Actinobacteria{class}(96);Solirubrobacterales{order}(96);Conexibacteraceae{family}(96);Conexibacter{genus}(96);uncultured_Rubrobacteraceae_bacterium{species}(96)	Bacteria	Actinobacteria	Actinobacteria	Solirubrobacterales	Conexibacteraceae	Conexibacter	uncultured_Rubrobacteraceae_bacterium
ASV909	0	0	0	0	0	94	0	0	0	0	0	0	0	0	0	94	Bacteria{superkingdom}(100);Proteobacteria{phylum}(100);Betaproteobacteria{class}(100);{order}(100);{family}(100);{genus}(100);Unassigned{species}(0)	Bacteria	Proteobacteria	Betaproteobacteria				Unassigned
ASV910	58	879	21	0	40	21	49	143	0	0	0	0	0	0	76	1287	Bacteria{superkingdom}(100);Chloroflexi{phylum}(100);{class}(100);{order}(100);{family}(100);{genus}(100);uncultured_Firmicutes_bacterium{species}(100)	Bacteria	Chloroflexi					uncultured_Firmicutes_bacterium
ASV911	0	0	0	0	45	0	0	0	0	0	0	0	0	0	5	50	Bacteria{superkingdom}(99);Proteobacteria{phylum}(99);Alphaproteobacteria{class}(99);Rhizobiales{order}(99);Rhizobiaceae{family}(99);Rhizobium{genus}(99);Unassigned{species}(0)	Bacteria	Proteobacteria	Alphaproteobacteria	Rhizobiales	Rhizobiaceae	Rhizobium	Unassigned
ASV912	0	104	0	27	0	0	59	59	0	0	12	0	62	0	0	323	Bacteria{superkingdom}(99);Proteobacteria{phylum}(99);Alphaproteobacteria{class}(99);Rhodospirillales{order}(99);{family}(99);{genus}(99);Unassigned{species}(0)	Bacteria	Proteobacteria	Alphaproteobacteria	Rhodospirillales			Unassigned
ASV913	68	0	39	27	89	0	18	29	0	48	21	12	0	99	0	450	Bacteria{superkingdom}(100);Actinobacteria{phylum}(100);Unassigned{class}(0);Unassigned{order}(0);Unassigned{family}(0);Unassigned{genus}(0);Unassigned{species}(0)	Bacteria	Actinobacteria	Unassigned	Unassigned	Unassigned	Unassigned	Unassigned
ASV914	0	0	23	91	0	0	0	0	50	0	0	0	0	0	0	164	Bacteria{superkingdom}(80);Proteobacteria{phylum}(80);Gammaproteobacteria{class}(80);Xanthomonadales{order}(80);Sinobacteraceae{family}(80);Povalibacter{genus}(80);uncultured_Burkholderiales_bacterium{species}(80)	Bacteria	Proteobacteria	Gammaproteobacteria	Xanthomonadales	Sinobacteraceae	Povalibacter	uncultured_Burkholderiales_bacterium
ASV915	0	2598	0	104	35	0	37	35	0	111	0	261	24	81	238	3524	Bacteria{superkingdom}(100);Actinobacteria{phylum}(100);Unassigned{class}(0);Unassigned{order}(0);Unassigned{family}(0);Unassigned{genus}(0);Unassigned{species}(0)	Bacteria	Actinobacteria	Unassigned	Unassigned	Unassigned	Unassigned	Unassigned
ASV916	0	0	35	59	195	54	72	82	127	197	158	58	581	0	57	1675	Bacteria{superkingdom}(100);Bacteroidetes{phylum}(100);Cytophagia{class}(100);Cytophagales{order}(100);{family}(100);Ohtaekwangia{genus}(100);Unassigned{species}(0)	Bacteria	Bacteroidetes	Cytophagia	Cytophagales		Ohtaekwangia	Unassigned
ASV917	0	0	0	0	0	58	93	0	0	0	0	0	0	49	42	242	Bacteria{superkingdom}(100);Proteobacteria{phylum}(100);Unassigned{class}(0);Unassigned{order}(0);Unassigned{family}(0);Unassigned{genus}(0);Unassigned{species}(0)	Bacteria	Proteobacteria	Unassigned	Unassigned	Unassigned	Unassigned	Unassigned
ASV918	0	452	52	0	0	0	0	0	24	0	0	0	0	0	0	528	Bacteria{superkingdom}(84);Actinobacteria{phylum}(84);Actinobacteria{class}(84);Solirubrobacterales{order}(84);{family}(84);{genus}(84);Unassigned{species}(0)	Bacteria	Actinobacteria	Actinobacteria	Solirubrobacterales			Unassigned
ASV919	0	0	0	0	0	0	0	79	0	0	0	0	0	0	0	79	Bacteria{superkingdom}(100);Proteobacteria{phylum}(100);Alphaproteobacteria{class}(100);Rhizobiales{order}(100);Methylobacteriaceae{family}(100);Microvirga{genus}(100);Unassigned{species}(0)	Bacteria	Proteobacteria	Alphaproteobacteria	Rhizobiales	Methylobacteriaceae	Microvirga	Unassigned
ASV920	79	0	95	0	114	306	70	0	50	56	0	0	0	0	43	813	Bacteria{superkingdom}(94);Chloroflexi{phylum}(94);{class}(94);{order}(94);{family}(94);{genus}(94);Unassigned{species}(0)	Bacteria	Chloroflexi					Unassigned
ASV922	20	0	16	64	275	47	0	37	0	0	73	0	0	0	0	532	Bacteria{superkingdom}(100);Proteobacteria{phylum}(100);Gammaproteobacteria{class}(100);{order}(100);{family}(100);{genus}(100);Unassigned{species}(0)	Bacteria	Proteobacteria	Gammaproteobacteria				Unassigned
ASV923	19	62	19	0	70	14	18	0	24	0	60	0	0	39	0	325	Bacteria{superkingdom}(88);Proteobacteria{phylum}(88);Alphaproteobacteria{class}(88);Rhizobiales{order}(88);Hyphomicrobiaceae{family}(88);Pedomicrobium{genus}(88);uncultured_alpha_proteobacterium{species}(88)	Bacteria	Proteobacteria	Alphaproteobacteria	Rhizobiales	Hyphomicrobiaceae	Pedomicrobium	uncultured_alpha_proteobacterium
ASV924	0	0	0	0	0	0	0	0	0	76	0	0	0	0	0	76	Bacteria{superkingdom}(100);Actinobacteria{phylum}(100);Actinobacteria{class}(100);Actinomycetales{order}(100);Nocardioidaceae{family}(100);Nocardioides{genus}(100);Unassigned{species}(0)	Bacteria	Actinobacteria	Actinobacteria	Actinomycetales	Nocardioidaceae	Nocardioides	Unassigned
ASV925	8	17	13	0	260	0	0	5	0	26	0	7	42	44	0	422	Bacteria{superkingdom}(100);Chloroflexi{phylum}(100);{class}(100);{order}(100);{family}(100);{genus}(100);uncultured_Anaerolineae_bacterium{species}(100)	Bacteria	Chloroflexi					uncultured_Anaerolineae_bacterium
ASV926	0	0	8	25	0	0	0	0	24	0	0	0	0	0	0	57	Bacteria{superkingdom}(100);Unassigned{phylum}(0);Unassigned{class}(0);Unassigned{order}(0);Unassigned{family}(0);Unassigned{genus}(0);Unassigned{species}(0)	Bacteria	Unassigned	Unassigned	Unassigned	Unassigned	Unassigned	Unassigned
ASV927	0	0	0	0	0	0	0	0	0	0	0	21	0	0	0	21	Bacteria{superkingdom}(100);Bacteroidetes{phylum}(100);Cytophagia{class}(100);Cytophagales{order}(100);Cytophagaceae{family}(100);Adhaeribacter{genus}(100);Unassigned{species}(0)	Bacteria	Bacteroidetes	Cytophagia	Cytophagales	Cytophagaceae	Adhaeribacter	Unassigned
ASV928	0	0	58	164	341	0	0	0	0	0	31	0	0	0	0	594	Bacteria{superkingdom}(97);Proteobacteria{phylum}(97);Alphaproteobacteria{class}(97);Rhizobiales{order}(97);Hyphomicrobiaceae{family}(97);Devosia{genus}(97);Unassigned{species}(0)	Bacteria	Proteobacteria	Alphaproteobacteria	Rhizobiales	Hyphomicrobiaceae	Devosia	Unassigned
ASV929	75	0	46	66	123	15	29	39	28	68	0	48	28	67	47	679	Bacteria{superkingdom}(100);Proteobacteria{phylum}(100);Alphaproteobacteria{class}(100);Caulobacterales{order}(100);Caulobacteraceae{family}(100);Unassigned{genus}(0);Unassigned{species}(0)	Bacteria	Proteobacteria	Alphaproteobacteria	Caulobacterales	Caulobacteraceae	Unassigned	Unassigned
ASV930	37	32	61	155	0	59	38	34	81	147	80	242	86	5	54	1111	Bacteria{superkingdom}(100);Actinobacteria{phylum}(100);Actinobacteria{class}(100);Gaiellales{order}(100);Gaiellaceae{family}(100);Gaiella{genus}(100);uncultured_Actinomycetales_bacterium{species}(100)	Bacteria	Actinobacteria	Actinobacteria	Gaiellales	Gaiellaceae	Gaiella	uncultured_Actinomycetales_bacterium
ASV931	52	0	0	0	222	0	0	0	0	0	0	0	0	0	0	274	Bacteria{superkingdom}(82);Proteobacteria{phylum}(82);Deltaproteobacteria{class}(82);Myxococcales{order}(82);Kofleriaceae{family}(82);Kofleria{genus}(82);Kofleria_flava{species}(82)	Bacteria	Proteobacteria	Deltaproteobacteria	Myxococcales	Kofleriaceae	Kofleria	Kofleria_flava
ASV932	66	32	21	28	72	0	26	12	0	43	0	38	20	55	0	413	Bacteria{superkingdom}(97);Actinobacteria{phylum}(97);Actinobacteria{class}(97);Solirubrobacterales{order}(97);{family}(97);{genus}(97);uncultured_bacterium{species}(97)	Bacteria	Actinobacteria	Actinobacteria	Solirubrobacterales			uncultured_bacterium
ASV933	31	37	11	32	0	20	46	23	0	48	0	80	57	27	38	450	Bacteria{superkingdom}(99);Actinobacteria{phylum}(99);Actinobacteria{class}(99);Unassigned{order}(0);Unassigned{family}(0);Unassigned{genus}(0);Unassigned{species}(0)	Bacteria	Actinobacteria	Actinobacteria	Unassigned	Unassigned	Unassigned	Unassigned
ASV934	10	0	28	66	19	0	0	26	0	0	70	37	0	94	22	372	Bacteria{superkingdom}(91);Proteobacteria{phylum}(91);Deltaproteobacteria{class}(91);Myxococcales{order}(91);Polyangiaceae{family}(91);{genus}(91);Unassigned{species}(0)	Bacteria	Proteobacteria	Deltaproteobacteria	Myxococcales	Polyangiaceae		Unassigned
ASV935	0	0	0	0	0	0	0	66	35	0	109	0	0	0	0	210	Bacteria{superkingdom}(94);Firmicutes{phylum}(94);Bacilli{class}(94);Bacillales{order}(94);Planococcaceae{family}(94);Lysinibacillus{genus}(94);Unassigned{species}(0)	Bacteria	Firmicutes	Bacilli	Bacillales	Planococcaceae	Lysinibacillus	Unassigned
ASV936	44	12	63	125	254	0	0	0	0	16	0	22	0	0	15	551	Bacteria{superkingdom}(100);Planctomycetes{phylum}(100);Planctomycetia{class}(100);Planctomycetales{order}(100);Planctomycetaceae{family}(100);{genus}(100);Unassigned{species}(0)	Bacteria	Planctomycetes	Planctomycetia	Planctomycetales	Planctomycetaceae		Unassigned
ASV937	117	195	0	50	61	0	0	0	0	34	39	42	27	47	21	633	Bacteria{superkingdom}(100);Actinobacteria{phylum}(100);Actinobacteria{class}(100);Actinomycetales{order}(100);Sporichthyaceae{family}(100);Sporichthya{genus}(100);Unassigned{species}(0)	Bacteria	Actinobacteria	Actinobacteria	Actinomycetales	Sporichthyaceae	Sporichthya	Unassigned
ASV938	0	0	0	0	0	0	0	0	197	0	0	0	0	0	0	197	Bacteria{superkingdom}(100);Acidobacteria{phylum}(100);Acidobacteria_Gp7{class}(100);{order}(100);{family}(100);Gp7{genus}(100);Unassigned{species}(0)	Bacteria	Acidobacteria	Acidobacteria_Gp7			Gp7	Unassigned
ASV939	0	0	0	0	0	0	0	0	0	0	0	36	68	56	0	160	Bacteria{superkingdom}(100);Actinobacteria{phylum}(100);Actinobacteria{class}(100);Actinomycetales{order}(100);Geodermatophilaceae{family}(100);Unassigned{genus}(0);Unassigned{species}(0)	Bacteria	Actinobacteria	Actinobacteria	Actinomycetales	Geodermatophilaceae	Unassigned	Unassigned
ASV941	0	183	15	0	48	0	0	0	0	0	0	0	0	0	0	246	Bacteria{superkingdom}(93);Bacteroidetes{phylum}(93);Sphingobacteriia{class}(93);Sphingobacteriales{order}(93);Chitinophagaceae{family}(93);{genus}(93);Unassigned{species}(0)	Bacteria	Bacteroidetes	Sphingobacteriia	Sphingobacteriales	Chitinophagaceae		Unassigned
ASV942	0	0	0	119	2173	0	0	0	0	98	41	21	0	23	0	2475	Bacteria{superkingdom}(96);Bacteroidetes{phylum}(96);Sphingobacteriia{class}(96);Sphingobacteriales{order}(96);Chitinophagaceae{family}(96);{genus}(96);Unassigned{species}(0)	Bacteria	Bacteroidetes	Sphingobacteriia	Sphingobacteriales	Chitinophagaceae		Unassigned
ASV943	47	0	47	140	225	0	62	43	42	216	126	0	71	0	78	1097	Bacteria{superkingdom}(100);Acidobacteria{phylum}(100);Acidobacteria_Gp6{class}(100);{order}(100);{family}(100);Gp6{genus}(100);Unassigned{species}(0)	Bacteria	Acidobacteria	Acidobacteria_Gp6			Gp6	Unassigned
ASV945	0	0	0	0	0	0	0	0	0	166	0	0	0	0	0	166	Bacteria{superkingdom}(100);Armatimonadetes{phylum}(100);Armatimonadia{class}(100);Armatimonadales{order}(100);Armatimonadaceae{family}(100);Armatimonas/Armatimonadetes_gp1{genus}(100);uncultured_bacterium{species}(100)	Bacteria	Armatimonadetes	Armatimonadia	Armatimonadales	Armatimonadaceae	Armatimonas/Armatimonadetes_gp1	uncultured_bacterium
ASV947	55	292	0	0	0	0	38	55	0	0	0	0	0	16	0	456	Bacteria{superkingdom}(98);Actinobacteria{phylum}(98);Actinobacteria{class}(98);Solirubrobacterales{order}(98);{family}(98);{genus}(98);Unassigned{species}(0)	Bacteria	Actinobacteria	Actinobacteria	Solirubrobacterales			Unassigned
ASV948	0	0	0	0	0	0	0	0	0	0	0	0	0	0	19	19	Bacteria{superkingdom}(100);Bacteroidetes{phylum}(100);Sphingobacteriia{class}(100);Sphingobacteriales{order}(100);Chitinophagaceae{family}(100);Flavisolibacter{genus}(100);Unassigned{species}(0)	Bacteria	Bacteroidetes	Sphingobacteriia	Sphingobacteriales	Chitinophagaceae	Flavisolibacter	Unassigned
ASV950	33	0	60	66	117	37	37	0	0	29	0	0	0	0	0	379	Bacteria{superkingdom}(100);Chloroflexi{phylum}(100);Chloroflexia{class}(100);{order}(100);{family}(100);{genus}(100);uncultured_bacterium{species}(100)	Bacteria	Chloroflexi	Chloroflexia				uncultured_bacterium
ASV951	13	85	0	50	0	0	0	0	20	0	2	0	0	0	0	170	Bacteria{superkingdom}(100);Bacteroidetes{phylum}(100);Sphingobacteriia{class}(100);Sphingobacteriales{order}(100);Chitinophagaceae{family}(100);Segetibacter{genus}(100);Unassigned{species}(0)	Bacteria	Bacteroidetes	Sphingobacteriia	Sphingobacteriales	Chitinophagaceae	Segetibacter	Unassigned
ASV952	60	0	0	0	0	0	0	0	0	0	0	0	0	0	0	60	Bacteria{superkingdom}(100);Bacteroidetes{phylum}(100);Cytophagia{class}(100);Cytophagales{order}(100);{family}(100);Ohtaekwangia{genus}(100);Unassigned{species}(0)	Bacteria	Bacteroidetes	Cytophagia	Cytophagales		Ohtaekwangia	Unassigned
ASV953	55	143	76	258	210	14	15	12	16	0	70	45	145	0	55	1114	Bacteria{superkingdom}(100);Proteobacteria{phylum}(100);Alphaproteobacteria{class}(100);Sphingomonadales{order}(100);Sphingomonadaceae{family}(100);Novosphingobium{genus}(100);Unassigned{species}(0)	Bacteria	Proteobacteria	Alphaproteobacteria	Sphingomonadales	Sphingomonadaceae	Novosphingobium	Unassigned
ASV954	48	0	72	108	269	25	115	0	0	171	106	0	0	0	50	964	Bacteria{superkingdom}(96);Actinobacteria{phylum}(96);{class}(96);{order}(96);{family}(96);{genus}(96);uncultured_Rubrobacteridae_bacterium{species}(96)	Bacteria	Actinobacteria					uncultured_Rubrobacteridae_bacterium
ASV955	0	0	2	143	51	0	0	0	166	0	3888	808	0	0	98	5156	Bacteria{superkingdom}(84);Acidobacteria{phylum}(84);Acidobacteria_Gp10{class}(84);{order}(84);{family}(84);Gp10{genus}(84);uncultured_Firmicutes_bacterium{species}(84)	Bacteria	Acidobacteria	Acidobacteria_Gp10			Gp10	uncultured_Firmicutes_bacterium
ASV957	0	0	0	64	0	38	0	76	40	120	0	72	75	67	55	607	Bacteria{superkingdom}(98);Proteobacteria{phylum}(98);Deltaproteobacteria{class}(98);Myxococcales{order}(98);{family}(98);{genus}(98);Unassigned{species}(0)	Bacteria	Proteobacteria	Deltaproteobacteria	Myxococcales			Unassigned
ASV958	0	49	0	0	0	0	43	56	11	51	0	0	0	0	0	210	Bacteria{superkingdom}(100);Chloroflexi{phylum}(100);Caldilineae{class}(100);Caldilineales{order}(100);Caldilineaceae{family}(100);Litorilinea{genus}(100);uncultured_Rubrobacter_sp.{species}(100)	Bacteria	Chloroflexi	Caldilineae	Caldilineales	Caldilineaceae	Litorilinea	uncultured_Rubrobacter_sp.
ASV959	0	0	0	0	0	0	0	0	0	0	0	88	0	34	0	122	Bacteria{superkingdom}(95);Proteobacteria{phylum}(95);Alphaproteobacteria{class}(95);Rhizobiales{order}(95);Rhizobiaceae{family}(95);Rhizobium{genus}(95);Unassigned{species}(0)	Bacteria	Proteobacteria	Alphaproteobacteria	Rhizobiales	Rhizobiaceae	Rhizobium	Unassigned
ASV961	0	0	14	55	0	248	77	35	254	38	127	11	0	0	93	952	Bacteria{superkingdom}(94);{phylum}(94);{class}(94);{order}(94);{family}(94);{genus}(94);uncultured_candidate_division_SPAM_bacterium{species}(94)	Bacteria						uncultured_candidate_division_SPAM_bacterium
ASV963	34	0	51	50	43	25	32	37	30	59	0	0	75	0	30	466	Bacteria{superkingdom}(100);Actinobacteria{phylum}(100);Actinobacteria{class}(100);Gaiellales{order}(100);Gaiellaceae{family}(100);Gaiella{genus}(100);Unassigned{species}(0)	Bacteria	Actinobacteria	Actinobacteria	Gaiellales	Gaiellaceae	Gaiella	Unassigned
ASV964	113	0	1124	30	198	0	0	0	0	0	1321	0	0	0	5	2791	Bacteria{superkingdom}(100);{phylum}(100);{class}(100);{order}(100);{family}(100);{genus}(100);uncultured_Gemmatimonadetes_bacterium{species}(100)	Bacteria						uncultured_Gemmatimonadetes_bacterium
ASV965	14	0	6	0	0	94	32	0	0	0	0	90	45	0	5	286	Bacteria{superkingdom}(100);{phylum}(100);{class}(100);{order}(100);{family}(100);{genus}(100);uncultured_Actinomyces_sp.{species}(100)	Bacteria						uncultured_Actinomyces_sp.
ASV966	0	0	0	162	0	15	0	0	0	0	0	0	0	0	21	198	Bacteria{superkingdom}(86);Proteobacteria{phylum}(86);Alphaproteobacteria{class}(86);Rhizobiales{order}(86);Hyphomicrobiaceae{family}(86);Pedomicrobium{genus}(86);uncultured_alpha_proteobacterium{species}(86)	Bacteria	Proteobacteria	Alphaproteobacteria	Rhizobiales	Hyphomicrobiaceae	Pedomicrobium	uncultured_alpha_proteobacterium
ASV967	21	108	16	18	17	59	110	32	51	131	25	9	0	10	62	669	Bacteria{superkingdom}(94);Chloroflexi{phylum}(94);{class}(94);{order}(94);{family}(94);{genus}(94);bacterium_Ellin6543{species}(94)	Bacteria	Chloroflexi					bacterium_Ellin6543
ASV968	127	43	27	62	317	0	0	0	0	0	15	0	0	0	0	591	Bacteria{superkingdom}(96);Proteobacteria{phylum}(96);Betaproteobacteria{class}(96);Burkholderiales{order}(96);Oxalobacteraceae{family}(96);Unassigned{genus}(0);Unassigned{species}(0)	Bacteria	Proteobacteria	Betaproteobacteria	Burkholderiales	Oxalobacteraceae	Unassigned	Unassigned
ASV970	110	12	123	13	904	0	0	0	0	0	0	0	0	0	0	1162	Bacteria{superkingdom}(100);Chloroflexi{phylum}(100);Thermomicrobia{class}(100);Sphaerobacterales{order}(100);Sphaerobacteraceae{family}(100);{genus}(100);Unassigned{species}(0)	Bacteria	Chloroflexi	Thermomicrobia	Sphaerobacterales	Sphaerobacteraceae		Unassigned
ASV971	31	181	6	0	236	0	0	302	0	0	0	0	0	0	0	756	Bacteria{superkingdom}(90);Acidobacteria{phylum}(90);Acidobacteria_Gp4{class}(90);{order}(90);{family}(90);Gp4{genus}(90);uncultured_Rhodopseudomonas_sp.{species}(90)	Bacteria	Acidobacteria	Acidobacteria_Gp4			Gp4	uncultured_Rhodopseudomonas_sp.
ASV972	0	132	0	0	0	0	0	0	0	0	0	0	0	0	0	132	Bacteria{superkingdom}(94);Actinobacteria{phylum}(94);Actinobacteria{class}(94);{order}(94);{family}(94);{genus}(94);uncultured_Frankia_sp.{species}(94)	Bacteria	Actinobacteria	Actinobacteria				uncultured_Frankia_sp.
ASV973	0	0	10	15	0	8	48	85	19	45	0	39	0	0	17	286	Bacteria{superkingdom}(100);Chloroflexi{phylum}(100);Chloroflexia{class}(100);Kallotenuales{order}(100);Kallotenuaceae{family}(100);Kallotenue{genus}(100);uncultured_bacterium{species}(100)	Bacteria	Chloroflexi	Chloroflexia	Kallotenuales	Kallotenuaceae	Kallotenue	uncultured_bacterium
ASV974	0	41	0	0	0	0	0	0	0	0	0	0	0	18	0	59	Bacteria{superkingdom}(100);Acidobacteria{phylum}(100);Acidobacteria_Gp6{class}(100);{order}(100);{family}(100);Gp6{genus}(100);Unassigned{species}(0)	Bacteria	Acidobacteria	Acidobacteria_Gp6			Gp6	Unassigned
ASV975	133	0	122	0	0	0	46	0	0	0	0	0	0	0	0	301	Bacteria{superkingdom}(100);Actinobacteria{phylum}(100);Actinobacteria{class}(100);Acidimicrobiales{order}(100);Unassigned{family}(0);Unassigned{genus}(0);Unassigned{species}(0)	Bacteria	Actinobacteria	Actinobacteria	Acidimicrobiales	Unassigned	Unassigned	Unassigned
ASV976	0	151	0	0	0	0	0	25	0	84	0	0	0	0	0	260	Bacteria{superkingdom}(100);Chloroflexi{phylum}(100);Chloroflexia{class}(100);Kallotenuales{order}(100);Kallotenuaceae{family}(100);Kallotenue{genus}(100);uncultured_bacterium{species}(100)	Bacteria	Chloroflexi	Chloroflexia	Kallotenuales	Kallotenuaceae	Kallotenue	uncultured_bacterium
ASV977	22	25	15	95	134	26	0	9	40	0	24	23	0	0	0	413	Bacteria{superkingdom}(82);Proteobacteria{phylum}(82);Gammaproteobacteria{class}(82);{order}(82);{family}(82);{genus}(82);uncultured_Steroidobacter_sp.{species}(82)	Bacteria	Proteobacteria	Gammaproteobacteria				uncultured_Steroidobacter_sp.
ASV978	20	183	23	0	83	0	0	0	0	18	0	38	18	43	0	426	Bacteria{superkingdom}(100);Actinobacteria{phylum}(100);Actinobacteria{class}(100);Actinomycetales{order}(100);Nocardioidaceae{family}(100);Nocardioides{genus}(100);Unassigned{species}(0)	Bacteria	Actinobacteria	Actinobacteria	Actinomycetales	Nocardioidaceae	Nocardioides	Unassigned
ASV979	81	0	0	0	272	0	0	0	0	53	0	0	0	433	0	839	Bacteria{superkingdom}(100);Actinobacteria{phylum}(100);Actinobacteria{class}(100);Actinomycetales{order}(100);Nocardioidaceae{family}(100);Nocardioides{genus}(100);Unassigned{species}(0)	Bacteria	Actinobacteria	Actinobacteria	Actinomycetales	Nocardioidaceae	Nocardioides	Unassigned
ASV980	0	116	0	0	59	76	123	91	28	237	125	124	147	154	362	1642	Bacteria{superkingdom}(100);Proteobacteria{phylum}(100);Alphaproteobacteria{class}(100);Rhodobacterales{order}(100);Rhodobacteraceae{family}(100);Rubellimicrobium{genus}(100);Unassigned{species}(0)	Bacteria	Proteobacteria	Alphaproteobacteria	Rhodobacterales	Rhodobacteraceae	Rubellimicrobium	Unassigned
ASV981	0	0	0	75	12	0	0	21	0	21	0	101	103	57	36	426	Bacteria{superkingdom}(86);Verrucomicrobia{phylum}(86);Opitutae{class}(86);Opitutales{order}(86);Opitutaceae{family}(86);Opitutus{genus}(86);uncultured_Opitutaceae_bacterium{species}(86)	Bacteria	Verrucomicrobia	Opitutae	Opitutales	Opitutaceae	Opitutus	uncultured_Opitutaceae_bacterium
ASV982	0	0	0	0	0	0	165	0	0	0	0	0	0	0	0	165	Bacteria{superkingdom}(99);Proteobacteria{phylum}(99);Gammaproteobacteria{class}(99);{order}(99);{family}(99);{genus}(99);uncultured_Steroidobacter_sp.{species}(99)	Bacteria	Proteobacteria	Gammaproteobacteria				uncultured_Steroidobacter_sp.
ASV983	117	43	47	6	114	38	0	0	29	0	0	9	29	75	15	522	Bacteria{superkingdom}(100);Planctomycetes{phylum}(100);Planctomycetia{class}(100);Planctomycetales{order}(100);Planctomycetaceae{family}(100);Pirellula{genus}(100);Unassigned{species}(0)	Bacteria	Planctomycetes	Planctomycetia	Planctomycetales	Planctomycetaceae	Pirellula	Unassigned
ASV984	24	0	0	0	157	27	0	0	0	0	33	0	0	68	42	351	Bacteria{superkingdom}(97);Planctomycetes{phylum}(97);Planctomycetia{class}(97);Planctomycetales{order}(97);Planctomycetaceae{family}(97);Blastopirellula{genus}(97);uncultured_bacterium{species}(97)	Bacteria	Planctomycetes	Planctomycetia	Planctomycetales	Planctomycetaceae	Blastopirellula	uncultured_bacterium
ASV985	0	26	0	0	0	0	0	13	0	0	0	0	0	21	0	60	Bacteria{superkingdom}(87);Proteobacteria{phylum}(87);Alphaproteobacteria{class}(87);Rhizobiales{order}(87);Methylobacteriaceae{family}(87);{genus}(87);uncultured_bacterium{species}(87)	Bacteria	Proteobacteria	Alphaproteobacteria	Rhizobiales	Methylobacteriaceae		uncultured_bacterium
ASV986	14	118	39	50	40	0	49	55	88	123	27	79	115	40	173	1010	Bacteria{superkingdom}(83);Chloroflexi{phylum}(83);Anaerolineae{class}(83);Anaerolineales{order}(83);Anaerolineaceae{family}(83);{genus}(83);Unassigned{species}(0)	Bacteria	Chloroflexi	Anaerolineae	Anaerolineales	Anaerolineaceae		Unassigned
ASV987	0	0	0	0	0	0	0	0	0	0	0	10	17	0	0	27	Bacteria{superkingdom}(100);Actinobacteria{phylum}(100);Actinobacteria{class}(100);Actinomycetales{order}(100);Microbacteriaceae{family}(100);Microbacterium{genus}(100);Unassigned{species}(0)	Bacteria	Actinobacteria	Actinobacteria	Actinomycetales	Microbacteriaceae	Microbacterium	Unassigned
ASV989	97	0	83	51	900	0	0	0	0	212	0	0	0	0	0	1343	Bacteria{superkingdom}(100);Verrucomicrobia{phylum}(100);Opitutae{class}(100);Opitutales{order}(100);Opitutaceae{family}(100);Opitutus{genus}(100);Unassigned{species}(0)	Bacteria	Verrucomicrobia	Opitutae	Opitutales	Opitutaceae	Opitutus	Unassigned
ASV990	0	0	0	0	0	0	0	0	0	0	0	26	0	16	18	60	Bacteria{superkingdom}(100);Bacteroidetes{phylum}(100);Sphingobacteriia{class}(100);Sphingobacteriales{order}(100);Chitinophagaceae{family}(100);Flavisolibacter{genus}(100);Unassigned{species}(0)	Bacteria	Bacteroidetes	Sphingobacteriia	Sphingobacteriales	Chitinophagaceae	Flavisolibacter	Unassigned
ASV991	62	0	0	0	357	0	0	0	16	0	0	0	0	0	0	435	Bacteria{superkingdom}(85);Proteobacteria{phylum}(85);Alphaproteobacteria{class}(85);Rhizobiales{order}(85);Hyphomicrobiaceae{family}(85);Hyphomicrobium{genus}(85);Unassigned{species}(0)	Bacteria	Proteobacteria	Alphaproteobacteria	Rhizobiales	Hyphomicrobiaceae	Hyphomicrobium	Unassigned
ASV992	0	0	0	0	0	0	0	21	0	26	0	0	0	0	0	47	Bacteria{superkingdom}(99);Chloroflexi{phylum}(99);{class}(99);{order}(99);{family}(99);{genus}(99);uncultured_Sphaerobacter_sp.{species}(99)	Bacteria	Chloroflexi					uncultured_Sphaerobacter_sp.
ASV993	43	51	45	0	0	0	0	0	0	0	0	0	0	28	0	167	Bacteria{superkingdom}(90);Acidobacteria{phylum}(90);Acidobacteria_Gp16{class}(90);{order}(90);{family}(90);Gp16{genus}(90);uncultured_Chloroflexi_bacterium{species}(90)	Bacteria	Acidobacteria	Acidobacteria_Gp16			Gp16	uncultured_Chloroflexi_bacterium
ASV994	0	26	0	0	0	29	290	43	0	0	0	11	34	0	33	466	Bacteria{superkingdom}(100);Bacteroidetes{phylum}(100);Sphingobacteriia{class}(100);Sphingobacteriales{order}(100);Chitinophagaceae{family}(100);Segetibacter{genus}(100);Unassigned{species}(0)	Bacteria	Bacteroidetes	Sphingobacteriia	Sphingobacteriales	Chitinophagaceae	Segetibacter	Unassigned
ASV995	42	0	443	110	0	0	0	0	0	0	3	0	0	0	0	598	Bacteria{superkingdom}(100);Unassigned{phylum}(0);Unassigned{class}(0);Unassigned{order}(0);Unassigned{family}(0);Unassigned{genus}(0);Unassigned{species}(0)	Bacteria	Unassigned	Unassigned	Unassigned	Unassigned	Unassigned	Unassigned
ASV996	0	79	0	0	0	0	0	0	0	24	0	0	0	0	0	103	Bacteria{superkingdom}(99);Proteobacteria{phylum}(99);Alphaproteobacteria{class}(99);Rhizobiales{order}(99);{family}(99);{genus}(99);uncultured_endolithic_bacterium{species}(99)	Bacteria	Proteobacteria	Alphaproteobacteria	Rhizobiales			uncultured_endolithic_bacterium
ASV997	0	0	0	27	0	0	0	0	0	0	0	0	0	0	0	27	Bacteria{superkingdom}(99);Actinobacteria{phylum}(99);Actinobacteria{class}(99);Actinomycetales{order}(99);Thermomonosporaceae{family}(99);Unassigned{genus}(0);Unassigned{species}(0)	Bacteria	Actinobacteria	Actinobacteria	Actinomycetales	Thermomonosporaceae	Unassigned	Unassigned
ASV998	0	288	0	0	0	0	0	0	0	0	0	0	0	0	0	288	Bacteria{superkingdom}(100);Actinobacteria{phylum}(100);Actinobacteria{class}(100);Actinomycetales{order}(100);Streptomycetaceae{family}(100);Streptomyces{genus}(100);Unassigned{species}(0)	Bacteria	Actinobacteria	Actinobacteria	Actinomycetales	Streptomycetaceae	Streptomyces	Unassigned
ASV999	22	0	0	0	0	37	0	0	16	59	25	0	50	0	23	232	Bacteria{superkingdom}(100);Acidobacteria{phylum}(100);Acidobacteria_Gp6{class}(100);{order}(100);{family}(100);Gp6{genus}(100);Unassigned{species}(0)	Bacteria	Acidobacteria	Acidobacteria_Gp6			Gp6	Unassigned
ASV1002	0	5	0	0	0	0	0	0	0	0	0	0	0	0	0	5	Bacteria{superkingdom}(100);Bacteroidetes{phylum}(100);Sphingobacteriia{class}(100);Sphingobacteriales{order}(100);Chitinophagaceae{family}(100);{genus}(100);Unassigned{species}(0)	Bacteria	Bacteroidetes	Sphingobacteriia	Sphingobacteriales	Chitinophagaceae		Unassigned
ASV1003	0	215	0	0	0	0	0	0	0	0	0	0	0	0	0	215	Bacteria{superkingdom}(97);Actinobacteria{phylum}(97);Actinobacteria{class}(97);Unassigned{order}(0);Unassigned{family}(0);Unassigned{genus}(0);Unassigned{species}(0)	Bacteria	Actinobacteria	Actinobacteria	Unassigned	Unassigned	Unassigned	Unassigned
ASV1004	38	201	95	59	97	36	0	13	71	108	93	146	145	24	140	1266	Bacteria{superkingdom}(100);Acidobacteria{phylum}(100);Acidobacteria_Gp16{class}(100);{order}(100);{family}(100);Gp16{genus}(100);Unassigned{species}(0)	Bacteria	Acidobacteria	Acidobacteria_Gp16			Gp16	Unassigned
ASV1005	17	120	0	41	70	31	0	54	12	108	25	25	0	117	0	620	Bacteria{superkingdom}(100);Proteobacteria{phylum}(100);Alphaproteobacteria{class}(100);Rhizobiales{order}(100);Hyphomicrobiaceae{family}(100);Unassigned{genus}(0);Unassigned{species}(0)	Bacteria	Proteobacteria	Alphaproteobacteria	Rhizobiales	Hyphomicrobiaceae	Unassigned	Unassigned
ASV1006	167	0	148	438	341	45	85	63	128	0	27	0	88	0	0	1530	Bacteria{superkingdom}(100);Firmicutes{phylum}(100);Bacilli{class}(100);Bacillales{order}(100);Paenibacillaceae_1{family}(100);Paenibacillus{genus}(100);Unassigned{species}(0)	Bacteria	Firmicutes	Bacilli	Bacillales	Paenibacillaceae_1	Paenibacillus	Unassigned
ASV1007	25	60	0	0	0	0	29	15	0	0	0	0	0	0	0	129	Bacteria{superkingdom}(91);Actinobacteria{phylum}(91);Actinobacteria{class}(91);Euzebyales{order}(91);Euzebyaceae{family}(91);Euzebya{genus}(91);uncultured_bacterium{species}(91)	Bacteria	Actinobacteria	Actinobacteria	Euzebyales	Euzebyaceae	Euzebya	uncultured_bacterium
ASV1008	0	0	0	0	0	0	0	0	0	0	0	31	0	50	0	81	Bacteria{superkingdom}(100);Proteobacteria{phylum}(100);Alphaproteobacteria{class}(100);Rhizobiales{order}(100);Methylobacteriaceae{family}(100);Microvirga{genus}(100);Unassigned{species}(0)	Bacteria	Proteobacteria	Alphaproteobacteria	Rhizobiales	Methylobacteriaceae	Microvirga	Unassigned
ASV1009	0	0	0	44	0	0	0	0	0	0	0	109	0	123	0	276	Bacteria{superkingdom}(100);Bacteroidetes{phylum}(100);Cytophagia{class}(100);Cytophagales{order}(100);{family}(100);Ohtaekwangia{genus}(100);Unassigned{species}(0)	Bacteria	Bacteroidetes	Cytophagia	Cytophagales		Ohtaekwangia	Unassigned
ASV1011	34	0	0	0	0	0	0	0	76	0	0	0	0	0	0	110	Bacteria{superkingdom}(100);Proteobacteria{phylum}(100);Alphaproteobacteria{class}(100);Rhizobiales{order}(100);Unassigned{family}(0);Unassigned{genus}(0);Unassigned{species}(0)	Bacteria	Proteobacteria	Alphaproteobacteria	Rhizobiales	Unassigned	Unassigned	Unassigned
ASV1012	12	45	9	25	67	1	0	2	8	12	0	8	2	3	2	196	Bacteria{superkingdom}(96);Proteobacteria{phylum}(96);Alphaproteobacteria{class}(96);Rhizobiales{order}(96);Rhizobiales_incertae_sedis{family}(96);Vasilyevaea{genus}(96);uncultured_bacterium{species}(96)	Bacteria	Proteobacteria	Alphaproteobacteria	Rhizobiales	Rhizobiales_incertae_sedis	Vasilyevaea	uncultured_bacterium
ASV1013	0	104	0	0	75	0	49	0	57	0	0	0	202	124	0	611	Bacteria{superkingdom}(96);Proteobacteria{phylum}(96);Alphaproteobacteria{class}(96);Sphingomonadales{order}(96);Sphingomonadaceae{family}(96);Novosphingobium{genus}(96);Unassigned{species}(0)	Bacteria	Proteobacteria	Alphaproteobacteria	Sphingomonadales	Sphingomonadaceae	Novosphingobium	Unassigned
ASV1014	0	0	0	71	0	0	0	0	0	0	0	0	0	0	0	71	Bacteria{superkingdom}(100);Planctomycetes{phylum}(100);Planctomycetia{class}(100);Planctomycetales{order}(100);Planctomycetaceae{family}(100);{genus}(100);uncultured_Pasteuria_sp.{species}(100)	Bacteria	Planctomycetes	Planctomycetia	Planctomycetales	Planctomycetaceae		uncultured_Pasteuria_sp.
ASV1015	69	0	43	0	160	0	0	16	0	18	0	23	18	0	0	347	Bacteria{superkingdom}(84);Proteobacteria{phylum}(84);Alphaproteobacteria{class}(84);Rhizobiales{order}(84);Hyphomicrobiaceae{family}(84);Pedomicrobium{genus}(84);uncultured_alpha_proteobacterium{species}(84)	Bacteria	Proteobacteria	Alphaproteobacteria	Rhizobiales	Hyphomicrobiaceae	Pedomicrobium	uncultured_alpha_proteobacterium
ASV1016	0	0	0	0	0	0	0	0	0	16	0	0	0	0	0	16	Bacteria{superkingdom}(100);Bacteroidetes{phylum}(100);Cytophagia{class}(100);Cytophagales{order}(100);Cytophagaceae{family}(100);Rhodocytophaga{genus}(100);uncultured_Bacteroidetes_bacterium{species}(100)	Bacteria	Bacteroidetes	Cytophagia	Cytophagales	Cytophagaceae	Rhodocytophaga	uncultured_Bacteroidetes_bacterium
ASV1017	20	0	0	55	0	60	92	78	18	38	0	0	0	0	0	361	Bacteria{superkingdom}(100);Actinobacteria{phylum}(100);Actinobacteria{class}(100);Gaiellales{order}(100);Gaiellaceae{family}(100);Gaiella{genus}(100);Unassigned{species}(0)	Bacteria	Actinobacteria	Actinobacteria	Gaiellales	Gaiellaceae	Gaiella	Unassigned
ASV1018	54	0	85	132	514	0	0	0	0	0	0	6	0	5	14	810	Bacteria{superkingdom}(100);Actinobacteria{phylum}(100);Actinobacteria{class}(100);Actinomycetales{order}(100);Microbacteriaceae{family}(100);Unassigned{genus}(0);Unassigned{species}(0)	Bacteria	Actinobacteria	Actinobacteria	Actinomycetales	Microbacteriaceae	Unassigned	Unassigned
ASV1019	0	0	0	0	0	0	0	0	0	0	0	65	20	0	0	85	Bacteria{superkingdom}(100);{phylum}(100);{class}(100);{order}(100);{family}(100);{genus}(100);uncultured_Gemmatimonadetes_bacterium{species}(100)	Bacteria						uncultured_Gemmatimonadetes_bacterium
ASV1020	0	10	0	0	0	0	0	0	0	35	0	0	0	17	0	62	Bacteria{superkingdom}(92);Proteobacteria{phylum}(92);Betaproteobacteria{class}(92);Burkholderiales{order}(92);Comamonadaceae{family}(92);Variovorax{genus}(92);Unassigned{species}(0)	Bacteria	Proteobacteria	Betaproteobacteria	Burkholderiales	Comamonadaceae	Variovorax	Unassigned
ASV1021	0	43	0	25	0	0	0	0	12	159	0	39	46	0	0	324	Bacteria{superkingdom}(100);Planctomycetes{phylum}(100);Planctomycetia{class}(100);Planctomycetales{order}(100);Planctomycetaceae{family}(100);Unassigned{genus}(0);Unassigned{species}(0)	Bacteria	Planctomycetes	Planctomycetia	Planctomycetales	Planctomycetaceae	Unassigned	Unassigned
ASV1022	0	193	0	0	0	0	0	0	0	0	0	39	1244	144	93	1713	Bacteria{superkingdom}(100);Actinobacteria{phylum}(100);Unassigned{class}(0);Unassigned{order}(0);Unassigned{family}(0);Unassigned{genus}(0);Unassigned{species}(0)	Bacteria	Actinobacteria	Unassigned	Unassigned	Unassigned	Unassigned	Unassigned
ASV1023	115	0	19	0	92	38	0	0	0	0	0	0	0	0	100	364	Bacteria{superkingdom}(100);Acidobacteria{phylum}(100);Acidobacteria_Gp10{class}(100);{order}(100);{family}(100);Gp10{genus}(100);Unassigned{species}(0)	Bacteria	Acidobacteria	Acidobacteria_Gp10			Gp10	Unassigned
ASV1024	0	0	0	41	0	0	0	26	0	21	0	0	0	0	0	88	Bacteria{superkingdom}(95);Actinobacteria{phylum}(95);Actinobacteria{class}(95);Solirubrobacterales{order}(95);Unassigned{family}(0);Unassigned{genus}(0);Unassigned{species}(0)	Bacteria	Actinobacteria	Actinobacteria	Solirubrobacterales	Unassigned	Unassigned	Unassigned
ASV1026	0	0	0	0	0	71	33	62	0	216	0	0	242	49	34	707	Bacteria{superkingdom}(100);Acidobacteria{phylum}(100);Acidobacteria_Gp6{class}(100);{order}(100);{family}(100);Gp6{genus}(100);Unassigned{species}(0)	Bacteria	Acidobacteria	Acidobacteria_Gp6			Gp6	Unassigned
ASV1027	0	0	5	0	78	164	0	0	0	0	10	0	0	0	10	267	Bacteria{superkingdom}(100);Ignavibacteriae{phylum}(100);Ignavibacteria{class}(100);Ignavibacteriales{order}(100);Ignavibacteriaceae{family}(100);Unassigned{genus}(0);Unassigned{species}(0)	Bacteria	Ignavibacteriae	Ignavibacteria	Ignavibacteriales	Ignavibacteriaceae	Unassigned	Unassigned
ASV1028	0	0	0	15	0	0	0	0	82	0	96	243	79	0	66	581	Bacteria{superkingdom}(85);Actinobacteria{phylum}(85);Actinobacteria{class}(85);Solirubrobacterales{order}(85);Solirubrobacteraceae{family}(85);Solirubrobacter{genus}(85);Unassigned{species}(0)	Bacteria	Actinobacteria	Actinobacteria	Solirubrobacterales	Solirubrobacteraceae	Solirubrobacter	Unassigned
ASV1029	0	0	0	0	0	0	0	0	0	0	0	11	0	0	0	11	Bacteria{superkingdom}(88);Armatimonadetes{phylum}(88);{class}(88);{order}(88);{family}(88);Armatimonadetes_gp4{genus}(88);uncultured_actinobacterium{species}(88)	Bacteria	Armatimonadetes				Armatimonadetes_gp4	uncultured_actinobacterium
ASV1030	0	100	0	0	0	0	0	0	0	71	0	0	20	70	0	261	Bacteria{superkingdom}(100);Proteobacteria{phylum}(100);Alphaproteobacteria{class}(100);Rhodospirillales{order}(100);Rhodospirillaceae{family}(100);Constrictibacter{genus}(100);uncultured_soil_bacterium{species}(100)	Bacteria	Proteobacteria	Alphaproteobacteria	Rhodospirillales	Rhodospirillaceae	Constrictibacter	uncultured_soil_bacterium
ASV1031	20	0	0	597	479	0	0	0	29	0	0	0	0	0	0	1125	Bacteria{superkingdom}(100);Acidobacteria{phylum}(100);Acidobacteria_Gp7{class}(100);{order}(100);{family}(100);Gp7{genus}(100);Unassigned{species}(0)	Bacteria	Acidobacteria	Acidobacteria_Gp7			Gp7	Unassigned
ASV1032	0	14	18	35	204	25	12	0	8	0	13	6	0	8	24	367	Bacteria{superkingdom}(100);Proteobacteria{phylum}(100);Alphaproteobacteria{class}(100);Rhizobiales{order}(100);Xanthobacteraceae{family}(100);Unassigned{genus}(0);Unassigned{species}(0)	Bacteria	Proteobacteria	Alphaproteobacteria	Rhizobiales	Xanthobacteraceae	Unassigned	Unassigned
ASV1034	0	114	0	0	0	0	0	28	22	130	0	78	114	38	83	607	Bacteria{superkingdom}(100);Actinobacteria{phylum}(100);Actinobacteria{class}(100);Actinomycetales{order}(100);Nocardioidaceae{family}(100);Nocardioides{genus}(100);Unassigned{species}(0)	Bacteria	Actinobacteria	Actinobacteria	Actinomycetales	Nocardioidaceae	Nocardioides	Unassigned
ASV1035	12	14	0	21	75	19	69	20	71	32	0	0	0	0	0	333	Bacteria{superkingdom}(99);Gemmatimonadetes{phylum}(99);Gemmatimonadetes{class}(99);Gemmatimonadales{order}(99);Gemmatimonadaceae{family}(99);Gemmatimonas{genus}(99);uncultured_prokaryote{species}(99)	Bacteria	Gemmatimonadetes	Gemmatimonadetes	Gemmatimonadales	Gemmatimonadaceae	Gemmatimonas	uncultured_prokaryote
ASV1036	93	0	0	114	366	0	0	0	0	0	0	0	0	0	0	573	Bacteria{superkingdom}(100);Actinobacteria{phylum}(100);Actinobacteria{class}(100);Actinomycetales{order}(100);Nocardioidaceae{family}(100);Nocardioides{genus}(100);Unassigned{species}(0)	Bacteria	Actinobacteria	Actinobacteria	Actinomycetales	Nocardioidaceae	Nocardioides	Unassigned
ASV1038	65	62	47	0	146	65	123	63	0	0	0	0	0	0	0	571	Bacteria{superkingdom}(93);Planctomycetes{phylum}(93);Planctomycetia{class}(93);Planctomycetales{order}(93);Planctomycetaceae{family}(93);Pirellula{genus}(93);uncultured_Planctomycetacia_bacterium{species}(93)	Bacteria	Planctomycetes	Planctomycetia	Planctomycetales	Planctomycetaceae	Pirellula	uncultured_Planctomycetacia_bacterium
ASV1039	0	17	0	27	0	36	30	23	0	79	18	46	524	89	18	907	Bacteria{superkingdom}(97);Acidobacteria{phylum}(97);{class}(97);{order}(97);{family}(97);{genus}(97);uncultured_Acidobacteriales_bacterium{species}(97)	Bacteria	Acidobacteria					uncultured_Acidobacteriales_bacterium
ASV1040	0	0	0	68	103	38	118	50	0	84	0	0	0	0	0	461	Bacteria{superkingdom}(93);Acidobacteria{phylum}(93);{class}(93);{order}(93);{family}(93);{genus}(93);uncultured_Geobacter_sp.{species}(93)	Bacteria	Acidobacteria					uncultured_Geobacter_sp.
ASV1041	43	0	60	0	0	0	41	0	26	34	0	19	0	0	35	258	Bacteria{superkingdom}(99);Proteobacteria{phylum}(99);Alphaproteobacteria{class}(99);Rhizobiales{order}(99);Rhizobiaceae{family}(99);Rhizobium{genus}(99);Unassigned{species}(0)	Bacteria	Proteobacteria	Alphaproteobacteria	Rhizobiales	Rhizobiaceae	Rhizobium	Unassigned
ASV1042	17	0	0	0	0	0	0	0	0	0	0	0	0	0	0	17	Bacteria{superkingdom}(100);Acidobacteria{phylum}(100);Acidobacteria_Gp7{class}(100);{order}(100);{family}(100);Gp7{genus}(100);Unassigned{species}(0)	Bacteria	Acidobacteria	Acidobacteria_Gp7			Gp7	Unassigned
ASV1043	0	49	0	16	43	0	0	0	0	0	0	38	0	0	0	146	Bacteria{superkingdom}(91);Proteobacteria{phylum}(91);Alphaproteobacteria{class}(91);Rhodobacterales{order}(91);Rhodobacteraceae{family}(91);Rubellimicrobium{genus}(91);uncultured_bacterium{species}(91)	Bacteria	Proteobacteria	Alphaproteobacteria	Rhodobacterales	Rhodobacteraceae	Rubellimicrobium	uncultured_bacterium
ASV1044	0	0	0	13	0	11	130	33	4	79	0	0	3	0	0	273	Bacteria{superkingdom}(99);Chloroflexi{phylum}(99);Unassigned{class}(0);Unassigned{order}(0);Unassigned{family}(0);Unassigned{genus}(0);Unassigned{species}(0)	Bacteria	Chloroflexi	Unassigned	Unassigned	Unassigned	Unassigned	Unassigned
ASV1047	0	0	0	0	0	0	0	0	0	0	0	0	0	9	0	9	Bacteria{superkingdom}(100);Proteobacteria{phylum}(100);Alphaproteobacteria{class}(100);Rhizobiales{order}(100);Unassigned{family}(0);Unassigned{genus}(0);Unassigned{species}(0)	Bacteria	Proteobacteria	Alphaproteobacteria	Rhizobiales	Unassigned	Unassigned	Unassigned
ASV1048	2	64	4	0	27	0	0	0	0	7	0	225	174	9	0	512	Bacteria{superkingdom}(100);Actinobacteria{phylum}(100);Actinobacteria{class}(100);Actinomycetales{order}(100);Nocardioidaceae{family}(100);Nocardioides{genus}(100);Unassigned{species}(0)	Bacteria	Actinobacteria	Actinobacteria	Actinomycetales	Nocardioidaceae	Nocardioides	Unassigned
ASV1049	18	17	0	0	0	0	0	0	0	0	9	9	0	29	0	82	Bacteria{superkingdom}(100);Proteobacteria{phylum}(100);Alphaproteobacteria{class}(100);Unassigned{order}(0);Unassigned{family}(0);Unassigned{genus}(0);Unassigned{species}(0)	Bacteria	Proteobacteria	Alphaproteobacteria	Unassigned	Unassigned	Unassigned	Unassigned
ASV1050	17	0	0	18	0	139	64	36	32	53	50	20	0	29	22	480	Bacteria{superkingdom}(88);Gemmatimonadetes{phylum}(88);Gemmatimonadetes{class}(88);Gemmatimonadales{order}(88);Gemmatimonadaceae{family}(88);Gemmatimonas{genus}(88);uncultured_bacterium{species}(88)	Bacteria	Gemmatimonadetes	Gemmatimonadetes	Gemmatimonadales	Gemmatimonadaceae	Gemmatimonas	uncultured_bacterium
ASV1051	0	0	0	28	0	17	9	53	0	81	0	0	221	0	0	409	Bacteria{superkingdom}(99);Acidobacteria{phylum}(99);Acidobacteria_Gp6{class}(99);{order}(99);{family}(99);Gp6{genus}(99);Unassigned{species}(0)	Bacteria	Acidobacteria	Acidobacteria_Gp6			Gp6	Unassigned
ASV1053	213	124	0	0	160	0	92	0	0	55	0	0	0	0	0	644	Bacteria{superkingdom}(98);Acidobacteria{phylum}(98);Acidobacteria_Gp16{class}(98);{order}(98);{family}(98);Gp16{genus}(98);uncultured_bacterium{species}(98)	Bacteria	Acidobacteria	Acidobacteria_Gp16			Gp16	uncultured_bacterium
ASV1054	0	0	0	0	0	0	0	0	0	9	0	17	8	0	0	34	Bacteria{superkingdom}(100);Chloroflexi{phylum}(100);Thermomicrobia{class}(100);Sphaerobacterales{order}(100);Sphaerobacteraceae{family}(100);Unassigned{genus}(0);Unassigned{species}(0)	Bacteria	Chloroflexi	Thermomicrobia	Sphaerobacterales	Sphaerobacteraceae	Unassigned	Unassigned
ASV1057	0	175	0	0	0	0	0	0	17	0	0	0	0	0	19	211	Bacteria{superkingdom}(92);Actinobacteria{phylum}(92);Actinobacteria{class}(92);Acidimicrobiales{order}(92);Acidimicrobineae_incertae_sedis{family}(92);Aciditerrimonas{genus}(92);Unassigned{species}(0)	Bacteria	Actinobacteria	Actinobacteria	Acidimicrobiales	Acidimicrobineae_incertae_sedis	Aciditerrimonas	Unassigned
ASV1058	0	394	0	0	0	0	0	0	0	0	0	0	0	0	0	394	Bacteria{superkingdom}(100);Acidobacteria{phylum}(100);Acidobacteria_Gp4{class}(100);{order}(100);{family}(100);Gp4{genus}(100);Unassigned{species}(0)	Bacteria	Acidobacteria	Acidobacteria_Gp4			Gp4	Unassigned
ASV1059	0	0	0	0	0	0	0	0	17	0	0	36	0	33	0	86	Bacteria{superkingdom}(100);Actinobacteria{phylum}(100);Actinobacteria{class}(100);Actinomycetales{order}(100);Geodermatophilaceae{family}(100);Unassigned{genus}(0);Unassigned{species}(0)	Bacteria	Actinobacteria	Actinobacteria	Actinomycetales	Geodermatophilaceae	Unassigned	Unassigned
ASV1060	0	39	0	0	0	0	0	0	0	0	0	0	0	20	0	59	Bacteria{superkingdom}(100);Actinobacteria{phylum}(100);Actinobacteria{class}(100);Actinomycetales{order}(100);Pseudonocardiaceae{family}(100);Unassigned{genus}(0);Unassigned{species}(0)	Bacteria	Actinobacteria	Actinobacteria	Actinomycetales	Pseudonocardiaceae	Unassigned	Unassigned
ASV1061	0	0	0	80	143	0	0	31	31	0	0	15	0	20	0	320	Bacteria{superkingdom}(86);Planctomycetes{phylum}(86);Planctomycetia{class}(86);Planctomycetales{order}(86);Planctomycetaceae{family}(86);{genus}(86);Unassigned{species}(0)	Bacteria	Planctomycetes	Planctomycetia	Planctomycetales	Planctomycetaceae		Unassigned
ASV1062	0	134	0	0	0	0	49	0	0	0	0	0	0	0	0	183	Bacteria{superkingdom}(100);Actinobacteria{phylum}(100);Actinobacteria{class}(100);Actinomycetales{order}(100);Unassigned{family}(0);Unassigned{genus}(0);Unassigned{species}(0)	Bacteria	Actinobacteria	Actinobacteria	Actinomycetales	Unassigned	Unassigned	Unassigned
ASV1064	0	0	0	0	0	0	0	34	0	0	20	68	56	17	0	195	Bacteria{superkingdom}(94);{phylum}(94);{class}(94);{order}(94);{family}(94);{genus}(94);Unassigned{species}(0)	Bacteria						Unassigned
ASV1065	116	219	66	28	146	561	108	19	14	96	0	0	0	0	8	1381	Bacteria{superkingdom}(100);Chloroflexi{phylum}(100);Chloroflexia{class}(100);{order}(100);{family}(100);{genus}(100);uncultured_bacterium{species}(100)	Bacteria	Chloroflexi	Chloroflexia				uncultured_bacterium
ASV1066	0	0	0	42	0	0	0	0	15	0	0	0	0	0	0	57	Bacteria{superkingdom}(99);Actinobacteria{phylum}(99);Actinobacteria{class}(99);Actinomycetales{order}(99);Streptomycetaceae{family}(99);Streptomyces{genus}(99);Unassigned{species}(0)	Bacteria	Actinobacteria	Actinobacteria	Actinomycetales	Streptomycetaceae	Streptomyces	Unassigned
ASV1067	0	0	0	0	0	0	0	0	0	0	0	0	0	29	0	29	Bacteria{superkingdom}(100);Proteobacteria{phylum}(100);Alphaproteobacteria{class}(100);Rhizobiales{order}(100);Hyphomicrobiaceae{family}(100);Devosia{genus}(100);Unassigned{species}(0)	Bacteria	Proteobacteria	Alphaproteobacteria	Rhizobiales	Hyphomicrobiaceae	Devosia	Unassigned
ASV1069	35	0	23	46	100	16	13	19	36	43	33	80	27	23	21	515	Bacteria{superkingdom}(92);Proteobacteria{phylum}(92);Alphaproteobacteria{class}(92);Rhizobiales{order}(92);Phyllobacteriaceae{family}(92);Mesorhizobium{genus}(92);Unassigned{species}(0)	Bacteria	Proteobacteria	Alphaproteobacteria	Rhizobiales	Phyllobacteriaceae	Mesorhizobium	Unassigned
ASV1070	0	0	0	0	0	0	0	0	7	9	0	6	17	0	0	39	Bacteria{superkingdom}(100);Bacteroidetes{phylum}(100);Sphingobacteriia{class}(100);Sphingobacteriales{order}(100);Chitinophagaceae{family}(100);Unassigned{genus}(0);Unassigned{species}(0)	Bacteria	Bacteroidetes	Sphingobacteriia	Sphingobacteriales	Chitinophagaceae	Unassigned	Unassigned
ASV1071	40	79	23	0	0	35	77	51	0	109	15	92	103	0	33	657	Bacteria{superkingdom}(100);Actinobacteria{phylum}(100);Actinobacteria{class}(100);Actinomycetales{order}(100);Unassigned{family}(0);Unassigned{genus}(0);Unassigned{species}(0)	Bacteria	Actinobacteria	Actinobacteria	Actinomycetales	Unassigned	Unassigned	Unassigned
ASV1072	10	0	0	757	378	0	24	16	35	0	36	20	0	0	0	1276	Bacteria{superkingdom}(85);Proteobacteria{phylum}(85);Gammaproteobacteria{class}(85);Xanthomonadales{order}(85);Sinobacteraceae{family}(85);Povalibacter{genus}(85);uncultured_bacterium{species}(85)	Bacteria	Proteobacteria	Gammaproteobacteria	Xanthomonadales	Sinobacteraceae	Povalibacter	uncultured_bacterium
ASV1074	15	0	32	35	0	23	45	27	54	48	10	97	0	32	4	422	Bacteria{superkingdom}(100);Planctomycetes{phylum}(100);Planctomycetia{class}(100);Planctomycetales{order}(100);Planctomycetaceae{family}(100);Pirellula{genus}(100);Unassigned{species}(0)	Bacteria	Planctomycetes	Planctomycetia	Planctomycetales	Planctomycetaceae	Pirellula	Unassigned
ASV1076	0	0	0	0	0	0	0	0	0	42	0	9	62	18	19	150	Bacteria{superkingdom}(94);Proteobacteria{phylum}(94);Alphaproteobacteria{class}(94);Rhizobiales{order}(94);{family}(94);{genus}(94);Unassigned{species}(0)	Bacteria	Proteobacteria	Alphaproteobacteria	Rhizobiales			Unassigned
ASV1077	0	0	0	0	0	0	0	0	0	1	0	9	0	0	0	10	Bacteria{superkingdom}(100);Proteobacteria{phylum}(100);Betaproteobacteria{class}(100);Burkholderiales{order}(100);Oxalobacteraceae{family}(100);Noviherbaspirillum{genus}(100);Unassigned{species}(0)	Bacteria	Proteobacteria	Betaproteobacteria	Burkholderiales	Oxalobacteraceae	Noviherbaspirillum	Unassigned
ASV1078	52	0	28	102	140	82	64	74	45	32	54	56	0	0	67	796	Bacteria{superkingdom}(100);Acidobacteria{phylum}(100);Acidobacteria_Gp6{class}(100);{order}(100);{family}(100);Gp6{genus}(100);Unassigned{species}(0)	Bacteria	Acidobacteria	Acidobacteria_Gp6			Gp6	Unassigned
ASV1080	0	0	0	0	0	0	0	0	0	0	0	13	0	0	0	13	Bacteria{superkingdom}(100);Bacteroidetes{phylum}(100);Cytophagia{class}(100);Cytophagales{order}(100);Cytophagaceae{family}(100);Adhaeribacter{genus}(100);Unassigned{species}(0)	Bacteria	Bacteroidetes	Cytophagia	Cytophagales	Cytophagaceae	Adhaeribacter	Unassigned
ASV1082	0	23	16	0	0	22	27	0	79	0	25	0	10	0	0	202	Bacteria{superkingdom}(100);Acidobacteria{phylum}(100);Acidobacteria_Gp6{class}(100);{order}(100);{family}(100);Gp6{genus}(100);Unassigned{species}(0)	Bacteria	Acidobacteria	Acidobacteria_Gp6			Gp6	Unassigned
ASV1083	32	0	33	35	123	33	41	0	36	46	13	0	0	6	28	426	Bacteria{superkingdom}(100);Verrucomicrobia{phylum}(100);Verrucomicrobiae{class}(100);Verrucomicrobiales{order}(100);Verrucomicrobiaceae{family}(100);{genus}(100);uncultured_Haloferula_sp.{species}(100)	Bacteria	Verrucomicrobia	Verrucomicrobiae	Verrucomicrobiales	Verrucomicrobiaceae		uncultured_Haloferula_sp.
ASV1084	100	0	169	191	236	27	30	97	54	58	70	105	64	24	0	1225	Bacteria{superkingdom}(100);Actinobacteria{phylum}(100);Actinobacteria{class}(100);Actinomycetales{order}(100);Nocardioidaceae{family}(100);Nocardioides{genus}(100);Unassigned{species}(0)	Bacteria	Actinobacteria	Actinobacteria	Actinomycetales	Nocardioidaceae	Nocardioides	Unassigned
ASV1085	0	0	7	0	81	0	0	0	19	0	0	0	0	0	0	107	Bacteria{superkingdom}(99);Bacteroidetes{phylum}(99);Sphingobacteriia{class}(99);Sphingobacteriales{order}(99);Chitinophagaceae{family}(99);Terrimonas{genus}(99);Unassigned{species}(0)	Bacteria	Bacteroidetes	Sphingobacteriia	Sphingobacteriales	Chitinophagaceae	Terrimonas	Unassigned
ASV1086	28	0	53	55	97	0	0	0	0	0	0	0	0	0	9	242	Bacteria{superkingdom}(100);Chloroflexi{phylum}(100);Caldilineae{class}(100);Caldilineales{order}(100);Caldilineaceae{family}(100);Litorilinea{genus}(100);uncultured_Litorilinea_sp.{species}(100)	Bacteria	Chloroflexi	Caldilineae	Caldilineales	Caldilineaceae	Litorilinea	uncultured_Litorilinea_sp.
ASV1087	0	0	0	0	12	0	0	0	0	0	0	0	0	0	0	12	Bacteria{superkingdom}(98);Cyanobacteria/Chloroplast{phylum}(98);Cyanobacteria{class}(98);{order}(98);{family}(98);{genus}(98);uncultured_Microcoleus_sp.{species}(98)	Bacteria	Cyanobacteria/Chloroplast	Cyanobacteria				uncultured_Microcoleus_sp.
ASV1088	58	0	66	104	0	0	0	19	50	0	0	0	0	0	29	326	Bacteria{superkingdom}(99);Actinobacteria{phylum}(99);Actinobacteria{class}(99);Actinomycetales{order}(99);Nocardioidaceae{family}(99);Nocardioides{genus}(99);Unassigned{species}(0)	Bacteria	Actinobacteria	Actinobacteria	Actinomycetales	Nocardioidaceae	Nocardioides	Unassigned
ASV1089	54	0	0	147	272	35	33	19	36	48	58	34	115	30	0	881	Bacteria{superkingdom}(100);Proteobacteria{phylum}(100);Alphaproteobacteria{class}(100);Rhizobiales{order}(100);Unassigned{family}(0);Unassigned{genus}(0);Unassigned{species}(0)	Bacteria	Proteobacteria	Alphaproteobacteria	Rhizobiales	Unassigned	Unassigned	Unassigned
ASV1090	0	0	0	0	0	0	0	0	0	0	55	96	94	117	98	460	Bacteria{superkingdom}(96);Proteobacteria{phylum}(96);Alphaproteobacteria{class}(96);Rhizobiales{order}(96);Xanthobacteraceae{family}(96);Pseudolabrys{genus}(96);Unassigned{species}(0)	Bacteria	Proteobacteria	Alphaproteobacteria	Rhizobiales	Xanthobacteraceae	Pseudolabrys	Unassigned
ASV1091	0	0	13	0	269	38	26	8	15	162	71	135	64	62	41	904	Bacteria{superkingdom}(96);Proteobacteria{phylum}(96);Alphaproteobacteria{class}(96);Rhizobiales{order}(96);Rhodobiaceae{family}(96);Rhodoligotrophos{genus}(96);uncultured_Rhizobiales_bacterium{species}(96)	Bacteria	Proteobacteria	Alphaproteobacteria	Rhizobiales	Rhodobiaceae	Rhodoligotrophos	uncultured_Rhizobiales_bacterium
ASV1092	19	253	19	0	0	0	0	0	19	0	0	0	0	0	0	310	Bacteria{superkingdom}(90);Actinobacteria{phylum}(90);Actinobacteria{class}(90);Actinomycetales{order}(90);Micrococcaceae{family}(90);Arthrobacter{genus}(90);Unassigned{species}(0)	Bacteria	Actinobacteria	Actinobacteria	Actinomycetales	Micrococcaceae	Arthrobacter	Unassigned
ASV1093	0	257	0	0	0	0	0	58	0	116	0	0	0	0	0	431	Bacteria{superkingdom}(99);Actinobacteria{phylum}(99);Actinobacteria{class}(99);Solirubrobacterales{order}(99);{family}(99);{genus}(99);Unassigned{species}(0)	Bacteria	Actinobacteria	Actinobacteria	Solirubrobacterales			Unassigned
ASV1094	0	0	0	0	0	0	0	0	0	58	0	81	0	192	14	345	Bacteria{superkingdom}(100);Chloroflexi{phylum}(100);Chloroflexia{class}(100);Kallotenuales{order}(100);Kallotenuaceae{family}(100);Kallotenue{genus}(100);Unassigned{species}(0)	Bacteria	Chloroflexi	Chloroflexia	Kallotenuales	Kallotenuaceae	Kallotenue	Unassigned
ASV1095	0	0	0	0	0	0	0	0	0	19	0	17	0	0	29	65	Bacteria{superkingdom}(100);Proteobacteria{phylum}(100);Gammaproteobacteria{class}(100);Xanthomonadales{order}(100);Sinobacteraceae{family}(100);Unassigned{genus}(0);Unassigned{species}(0)	Bacteria	Proteobacteria	Gammaproteobacteria	Xanthomonadales	Sinobacteraceae	Unassigned	Unassigned
ASV1096	0	0	0	0	0	0	77	41	0	0	0	0	0	0	0	118	Bacteria{superkingdom}(83);Actinobacteria{phylum}(83);Actinobacteria{class}(83);Acidimicrobiales{order}(83);Acidimicrobineae_incertae_sedis{family}(83);Aciditerrimonas{genus}(83);uncultured_Acidimicrobiales_bacterium{species}(83)	Bacteria	Actinobacteria	Actinobacteria	Acidimicrobiales	Acidimicrobineae_incertae_sedis	Aciditerrimonas	uncultured_Acidimicrobiales_bacterium
ASV1097	0	102	0	0	0	0	0	60	0	91	0	50	0	100	12	415	Bacteria{superkingdom}(100);Actinobacteria{phylum}(100);Actinobacteria{class}(100);Actinomycetales{order}(100);Pseudonocardiaceae{family}(100);Pseudonocardia{genus}(100);Unassigned{species}(0)	Bacteria	Actinobacteria	Actinobacteria	Actinomycetales	Pseudonocardiaceae	Pseudonocardia	Unassigned
ASV1098	0	0	0	0	0	0	0	40	0	0	0	0	0	0	0	40	Bacteria{superkingdom}(100);Acidobacteria{phylum}(100);Acidobacteria_Gp4{class}(100);{order}(100);{family}(100);Gp4{genus}(100);Unassigned{species}(0)	Bacteria	Acidobacteria	Acidobacteria_Gp4			Gp4	Unassigned
ASV1099	0	14	0	0	0	0	0	0	0	0	0	145	0	0	0	159	Bacteria{superkingdom}(97);Proteobacteria{phylum}(97);Alphaproteobacteria{class}(97);Sphingomonadales{order}(97);Sphingomonadaceae{family}(97);Sphingomonas{genus}(97);Unassigned{species}(0)	Bacteria	Proteobacteria	Alphaproteobacteria	Sphingomonadales	Sphingomonadaceae	Sphingomonas	Unassigned
ASV1100	23	81	0	55	51	17	38	20	78	35	45	26	26	0	25	520	Bacteria{superkingdom}(98);Actinobacteria{phylum}(98);Actinobacteria{class}(98);Acidimicrobiales{order}(98);{family}(98);{genus}(98);Unassigned{species}(0)	Bacteria	Actinobacteria	Actinobacteria	Acidimicrobiales			Unassigned
ASV1101	0	43	0	0	0	0	0	0	0	0	0	0	0	0	0	43	Bacteria{superkingdom}(91);Actinobacteria{phylum}(91);Actinobacteria{class}(91);Solirubrobacterales{order}(91);Unassigned{family}(0);Unassigned{genus}(0);Unassigned{species}(0)	Bacteria	Actinobacteria	Actinobacteria	Solirubrobacterales	Unassigned	Unassigned	Unassigned
ASV1102	20	0	0	0	0	122	45	15	0	45	0	0	0	0	77	324	Bacteria{superkingdom}(98);Planctomycetes{phylum}(98);Planctomycetia{class}(98);Planctomycetales{order}(98);Planctomycetaceae{family}(98);Pirellula{genus}(98);uncultured_Rhodopirellula_sp.{species}(98)	Bacteria	Planctomycetes	Planctomycetia	Planctomycetales	Planctomycetaceae	Pirellula	uncultured_Rhodopirellula_sp.
ASV1103	0	0	0	0	0	0	0	0	0	0	0	0	0	15	0	15	Bacteria{superkingdom}(100);Chloroflexi{phylum}(100);Thermomicrobia{class}(100);Sphaerobacterales{order}(100);Sphaerobacteraceae{family}(100);{genus}(100);uncultured_bacterium{species}(100)	Bacteria	Chloroflexi	Thermomicrobia	Sphaerobacterales	Sphaerobacteraceae		uncultured_bacterium
ASV1104	77	60	129	204	257	26	32	15	20	0	8	17	21	28	22	916	Bacteria{superkingdom}(100);Proteobacteria{phylum}(100);Alphaproteobacteria{class}(100);Caulobacterales{order}(100);Caulobacteraceae{family}(100);Unassigned{genus}(0);Unassigned{species}(0)	Bacteria	Proteobacteria	Alphaproteobacteria	Caulobacterales	Caulobacteraceae	Unassigned	Unassigned
ASV1105	73	0	55	53	344	0	0	0	0	79	26	23	0	0	18	671	Bacteria{superkingdom}(89);Proteobacteria{phylum}(89);Alphaproteobacteria{class}(89);Rhizobiales{order}(89);Hyphomicrobiaceae{family}(89);Devosia{genus}(89);Unassigned{species}(0)	Bacteria	Proteobacteria	Alphaproteobacteria	Rhizobiales	Hyphomicrobiaceae	Devosia	Unassigned
ASV1106	60	0	0	50	952	0	21	0	14	0	0	0	0	0	0	1097	Bacteria{superkingdom}(100);Planctomycetes{phylum}(100);Planctomycetia{class}(100);Planctomycetales{order}(100);Planctomycetaceae{family}(100);Pirellula{genus}(100);Unassigned{species}(0)	Bacteria	Planctomycetes	Planctomycetia	Planctomycetales	Planctomycetaceae	Pirellula	Unassigned
ASV1107	0	0	0	0	0	0	0	0	0	109	0	174	59	41	0	383	Bacteria{superkingdom}(100);Actinobacteria{phylum}(100);Actinobacteria{class}(100);Actinomycetales{order}(100);Nocardioidaceae{family}(100);Nocardioides{genus}(100);Unassigned{species}(0)	Bacteria	Actinobacteria	Actinobacteria	Actinomycetales	Nocardioidaceae	Nocardioides	Unassigned
ASV1108	0	0	0	0	0	0	0	31	0	0	0	0	0	0	0	31	Bacteria{superkingdom}(94);Bacteroidetes{phylum}(94);Cytophagia{class}(94);Cytophagales{order}(94);{family}(94);Ohtaekwangia{genus}(94);uncultured_Sphingobacteriales_bacterium{species}(94)	Bacteria	Bacteroidetes	Cytophagia	Cytophagales		Ohtaekwangia	uncultured_Sphingobacteriales_bacterium
ASV1109	0	0	0	0	0	0	0	0	0	19	0	0	0	0	0	19	Bacteria{superkingdom}(100);Unassigned{phylum}(0);Unassigned{class}(0);Unassigned{order}(0);Unassigned{family}(0);Unassigned{genus}(0);Unassigned{species}(0)	Bacteria	Unassigned	Unassigned	Unassigned	Unassigned	Unassigned	Unassigned
ASV1112	0	0	0	0	326	37	0	0	0	0	0	0	0	0	0	363	Bacteria{superkingdom}(100);Planctomycetes{phylum}(100);Planctomycetia{class}(100);Planctomycetales{order}(100);Planctomycetaceae{family}(100);Unassigned{genus}(0);Unassigned{species}(0)	Bacteria	Planctomycetes	Planctomycetia	Planctomycetales	Planctomycetaceae	Unassigned	Unassigned
ASV1113	0	0	0	13	0	19	43	63	24	34	17	39	33	0	6	291	Bacteria{superkingdom}(100);Unassigned{phylum}(0);Unassigned{class}(0);Unassigned{order}(0);Unassigned{family}(0);Unassigned{genus}(0);Unassigned{species}(0)	Bacteria	Unassigned	Unassigned	Unassigned	Unassigned	Unassigned	Unassigned
ASV1114	0	0	0	0	0	0	0	81	0	59	0	34	0	0	0	174	Bacteria{superkingdom}(97);Actinobacteria{phylum}(97);Actinobacteria{class}(97);Actinomycetales{order}(97);Geodermatophilaceae{family}(97);Geodermatophilus{genus}(97);Unassigned{species}(0)	Bacteria	Actinobacteria	Actinobacteria	Actinomycetales	Geodermatophilaceae	Geodermatophilus	Unassigned
ASV1115	0	0	0	0	0	19	0	28	0	30	0	0	59	21	0	157	Bacteria{superkingdom}(100);Actinobacteria{phylum}(100);Actinobacteria{class}(100);Actinomycetales{order}(100);Micromonosporaceae{family}(100);Unassigned{genus}(0);Unassigned{species}(0)	Bacteria	Actinobacteria	Actinobacteria	Actinomycetales	Micromonosporaceae	Unassigned	Unassigned
ASV1117	0	0	0	27	0	120	67	104	48	79	0	67	0	0	17	529	Bacteria{superkingdom}(100);Actinobacteria{phylum}(100);Actinobacteria{class}(100);{order}(100);{family}(100);{genus}(100);uncultured_Frankia_sp.{species}(100)	Bacteria	Actinobacteria	Actinobacteria				uncultured_Frankia_sp.
ASV1118	0	0	0	0	0	0	0	0	0	0	0	19	0	0	0	19	Bacteria{superkingdom}(100);Actinobacteria{phylum}(100);Actinobacteria{class}(100);Actinomycetales{order}(100);Unassigned{family}(0);Unassigned{genus}(0);Unassigned{species}(0)	Bacteria	Actinobacteria	Actinobacteria	Actinomycetales	Unassigned	Unassigned	Unassigned
ASV1119	23	0	0	0	0	0	675	33	29	2742	22	134	0	0	51	3709	Bacteria{superkingdom}(100);Acidobacteria{phylum}(100);Acidobacteria_Gp4{class}(100);{order}(100);{family}(100);Gp4{genus}(100);Unassigned{species}(0)	Bacteria	Acidobacteria	Acidobacteria_Gp4			Gp4	Unassigned
ASV1120	0	0	0	0	0	0	0	0	0	0	0	14	0	35	0	49	Bacteria{superkingdom}(98);Chloroflexi{phylum}(98);Caldilineae{class}(98);Caldilineales{order}(98);Caldilineaceae{family}(98);Litorilinea{genus}(98);uncultured_bacterium{species}(98)	Bacteria	Chloroflexi	Caldilineae	Caldilineales	Caldilineaceae	Litorilinea	uncultured_bacterium
ASV1121	55	60	10	30	117	0	0	0	14	0	6	0	0	19	6	317	Bacteria{superkingdom}(99);Proteobacteria{phylum}(99);Deltaproteobacteria{class}(99);{order}(99);{family}(99);{genus}(99);uncultured_Acidobacteriales_bacterium{species}(99)	Bacteria	Proteobacteria	Deltaproteobacteria				uncultured_Acidobacteriales_bacterium
ASV1125	0	136	0	0	0	2	21	132	0	0	0	0	0	0	0	291	Bacteria{superkingdom}(97);Chloroflexi{phylum}(97);Chloroflexia{class}(97);{order}(97);{family}(97);{genus}(97);uncultured_bacterium{species}(97)	Bacteria	Chloroflexi	Chloroflexia				uncultured_bacterium
ASV1126	0	0	0	0	0	0	0	35	0	0	0	0	0	0	0	35	Bacteria{superkingdom}(100);{phylum}(100);{class}(100);{order}(100);{family}(100);{genus}(100);Unassigned{species}(0)	Bacteria						Unassigned
ASV1127	0	34	0	0	0	0	0	34	0	0	0	6	0	19	0	93	Bacteria{superkingdom}(100);Armatimonadetes{phylum}(100);{class}(100);{order}(100);{family}(100);Armatimonadetes_gp4{genus}(100);uncultured_bacterium{species}(100)	Bacteria	Armatimonadetes				Armatimonadetes_gp4	uncultured_bacterium
ASV1128	0	0	9	0	0	0	0	0	0	0	0	0	0	25	0	34	Bacteria{superkingdom}(100);{phylum}(100);{class}(100);{order}(100);{family}(100);{genus}(100);uncultured_Gemmatimonadetes_bacterium{species}(100)	Bacteria						uncultured_Gemmatimonadetes_bacterium
ASV1129	0	51	27	0	0	0	12	0	214	0	0	0	0	0	39	343	Bacteria{superkingdom}(99);{phylum}(99);{class}(99);{order}(99);{family}(99);{genus}(99);uncultured_Actinomyces_sp.{species}(99)	Bacteria						uncultured_Actinomyces_sp.
ASV1130	27	0	40	93	64	15	0	19	34	51	20	0	19	58	21	461	Bacteria{superkingdom}(91);Planctomycetes{phylum}(91);Planctomycetia{class}(91);Planctomycetales{order}(91);Planctomycetaceae{family}(91);Singulisphaera{genus}(91);uncultured_Planctomycetacia_bacterium{species}(91)	Bacteria	Planctomycetes	Planctomycetia	Planctomycetales	Planctomycetaceae	Singulisphaera	uncultured_Planctomycetacia_bacterium
ASV1131	175	49	0	0	1154	0	0	0	0	0	0	0	21	0	0	1399	Bacteria{superkingdom}(100);Bacteroidetes{phylum}(100);Sphingobacteriia{class}(100);Sphingobacteriales{order}(100);Chitinophagaceae{family}(100);Chitinophaga{genus}(100);Unassigned{species}(0)	Bacteria	Bacteroidetes	Sphingobacteriia	Sphingobacteriales	Chitinophagaceae	Chitinophaga	Unassigned
ASV1132	0	0	0	0	0	0	0	72	0	237	0	0	0	0	0	309	Bacteria{superkingdom}(100);Bacteroidetes{phylum}(100);Sphingobacteriia{class}(100);Sphingobacteriales{order}(100);Chitinophagaceae{family}(100);Segetibacter{genus}(100);Unassigned{species}(0)	Bacteria	Bacteroidetes	Sphingobacteriia	Sphingobacteriales	Chitinophagaceae	Segetibacter	Unassigned
ASV1133	0	0	0	0	0	0	0	48	0	162	90	65	338	144	255	1102	Bacteria{superkingdom}(100);Proteobacteria{phylum}(100);Alphaproteobacteria{class}(100);Rhodobacterales{order}(100);Rhodobacteraceae{family}(100);Rubellimicrobium{genus}(100);Unassigned{species}(0)	Bacteria	Proteobacteria	Alphaproteobacteria	Rhodobacterales	Rhodobacteraceae	Rubellimicrobium	Unassigned
ASV1135	0	0	0	0	0	0	0	7	0	0	0	0	0	0	0	7	Bacteria{superkingdom}(93);Chloroflexi{phylum}(93);Chloroflexia{class}(93);Kallotenuales{order}(93);Kallotenuaceae{family}(93);Kallotenue{genus}(93);uncultured_bacterium{species}(93)	Bacteria	Chloroflexi	Chloroflexia	Kallotenuales	Kallotenuaceae	Kallotenue	uncultured_bacterium
ASV1137	0	12	0	0	0	0	0	0	0	244	0	0	0	0	0	256	Bacteria{superkingdom}(100);Proteobacteria{phylum}(100);Alphaproteobacteria{class}(100);Sphingomonadales{order}(100);Unassigned{family}(0);Unassigned{genus}(0);Unassigned{species}(0)	Bacteria	Proteobacteria	Alphaproteobacteria	Sphingomonadales	Unassigned	Unassigned	Unassigned
ASV1138	0	0	0	0	0	22	15	17	39	51	14	87	0	21	0	266	Bacteria{superkingdom}(82);Actinobacteria{phylum}(82);Actinobacteria{class}(82);Acidimicrobiales{order}(82);Acidimicrobineae_incertae_sedis{family}(82);Aciditerrimonas{genus}(82);uncultured_bacterium{species}(82)	Bacteria	Actinobacteria	Actinobacteria	Acidimicrobiales	Acidimicrobineae_incertae_sedis	Aciditerrimonas	uncultured_bacterium
ASV1140	0	0	0	0	0	0	0	0	0	0	0	0	5	2	0	7	Bacteria{superkingdom}(100);Bacteroidetes{phylum}(100);Sphingobacteriia{class}(100);Sphingobacteriales{order}(100);Chitinophagaceae{family}(100);Segetibacter{genus}(100);Unassigned{species}(0)	Bacteria	Bacteroidetes	Sphingobacteriia	Sphingobacteriales	Chitinophagaceae	Segetibacter	Unassigned
ASV1141	52	37	23	48	64	7	45	23	50	30	37	23	15	0	5	459	Bacteria{superkingdom}(100);Proteobacteria{phylum}(100);Alphaproteobacteria{class}(100);Rhizobiales{order}(100);Unassigned{family}(0);Unassigned{genus}(0);Unassigned{species}(0)	Bacteria	Proteobacteria	Alphaproteobacteria	Rhizobiales	Unassigned	Unassigned	Unassigned
ASV1142	113	0	73	0	0	423	223	0	139	240	0	0	0	40	127	1378	Bacteria{superkingdom}(97);Actinobacteria{phylum}(97);Actinobacteria{class}(97);{order}(97);{family}(97);{genus}(97);uncultured_Acidothermaceae_bacterium{species}(97)	Bacteria	Actinobacteria	Actinobacteria				uncultured_Acidothermaceae_bacterium
ASV1143	88	0	0	89	120	0	228	0	0	135	0	0	0	198	85	943	Bacteria{superkingdom}(92);Actinobacteria{phylum}(92);Actinobacteria{class}(92);Acidimicrobiales{order}(92);Acidimicrobineae_incertae_sedis{family}(92);Aciditerrimonas{genus}(92);uncultured_bacterium{species}(92)	Bacteria	Actinobacteria	Actinobacteria	Acidimicrobiales	Acidimicrobineae_incertae_sedis	Aciditerrimonas	uncultured_bacterium
ASV1144	0	0	0	60	0	46	0	13	32	61	0	0	42	0	0	254	Bacteria{superkingdom}(100);Bacteroidetes{phylum}(100);Sphingobacteriia{class}(100);Sphingobacteriales{order}(100);Chitinophagaceae{family}(100);Niastella{genus}(100);Unassigned{species}(0)	Bacteria	Bacteroidetes	Sphingobacteriia	Sphingobacteriales	Chitinophagaceae	Niastella	Unassigned
ASV1145	52	41	31	82	120	26	0	54	70	66	53	32	39	58	54	778	Bacteria{superkingdom}(83);Proteobacteria{phylum}(83);Alphaproteobacteria{class}(83);Rhizobiales{order}(83);Rhizobiales_incertae_sedis{family}(83);Vasilyevaea{genus}(83);uncultured_bacterium{species}(83)	Bacteria	Proteobacteria	Alphaproteobacteria	Rhizobiales	Rhizobiales_incertae_sedis	Vasilyevaea	uncultured_bacterium
ASV1146	0	0	17	746	157	25	38	17	0	0	18	0	0	0	0	1018	Bacteria{superkingdom}(84);Proteobacteria{phylum}(84);Oligoflexia{class}(84);Oligoflexales{order}(84);Oligoflexaceae{family}(84);Oligoflexus{genus}(84);uncultured_bacterium{species}(84)	Bacteria	Proteobacteria	Oligoflexia	Oligoflexales	Oligoflexaceae	Oligoflexus	uncultured_bacterium
ASV1147	0	0	0	60	59	0	0	0	0	0	0	0	0	0	0	119	Bacteria{superkingdom}(100);Proteobacteria{phylum}(100);Gammaproteobacteria{class}(100);Xanthomonadales{order}(100);Xanthomonadaceae{family}(100);Pseudofulvimonas{genus}(100);Unassigned{species}(0)	Bacteria	Proteobacteria	Gammaproteobacteria	Xanthomonadales	Xanthomonadaceae	Pseudofulvimonas	Unassigned
ASV1148	67	0	37	80	140	48	64	38	65	64	0	0	39	0	0	642	Bacteria{superkingdom}(100);Proteobacteria{phylum}(100);Betaproteobacteria{class}(100);Burkholderiales{order}(100);Unassigned{family}(0);Unassigned{genus}(0);Unassigned{species}(0)	Bacteria	Proteobacteria	Betaproteobacteria	Burkholderiales	Unassigned	Unassigned	Unassigned
ASV1151	0	0	0	0	0	0	0	23	0	46	0	0	0	70	0	139	Bacteria{superkingdom}(100);Acidobacteria{phylum}(100);Acidobacteria_Gp3{class}(100);{order}(100);{family}(100);Unassigned{genus}(0);Unassigned{species}(0)	Bacteria	Acidobacteria	Acidobacteria_Gp3			Unassigned	Unassigned
ASV1152	0	45	0	0	0	0	0	0	0	0	0	0	0	0	0	45	Bacteria{superkingdom}(100);Proteobacteria{phylum}(100);Alphaproteobacteria{class}(100);Rhizobiales{order}(100);Phyllobacteriaceae{family}(100);Mesorhizobium{genus}(100);Unassigned{species}(0)	Bacteria	Proteobacteria	Alphaproteobacteria	Rhizobiales	Phyllobacteriaceae	Mesorhizobium	Unassigned
ASV1153	41	0	0	0	0	0	0	0	0	0	0	0	0	31	0	72	Bacteria{superkingdom}(93);Proteobacteria{phylum}(93);Deltaproteobacteria{class}(93);{order}(93);{family}(93);{genus}(93);uncultured_Acidobacteriales_bacterium{species}(93)	Bacteria	Proteobacteria	Deltaproteobacteria				uncultured_Acidobacteriales_bacterium
ASV1154	75	386	65	53	189	87	70	96	44	68	0	21	41	24	0	1219	Bacteria{superkingdom}(100);Actinobacteria{phylum}(100);Actinobacteria{class}(100);Gaiellales{order}(100);Gaiellaceae{family}(100);Gaiella{genus}(100);Unassigned{species}(0)	Bacteria	Actinobacteria	Actinobacteria	Gaiellales	Gaiellaceae	Gaiella	Unassigned
ASV1155	86	0	69	119	56	0	0	0	0	68	42	48	0	0	89	577	Bacteria{superkingdom}(99);Actinobacteria{phylum}(99);Actinobacteria{class}(99);Actinomycetales{order}(99);Nocardioidaceae{family}(99);Aeromicrobium{genus}(99);Unassigned{species}(0)	Bacteria	Actinobacteria	Actinobacteria	Actinomycetales	Nocardioidaceae	Aeromicrobium	Unassigned
ASV1157	0	0	0	0	0	0	0	40	0	15	0	0	0	29	0	84	Bacteria{superkingdom}(100);Actinobacteria{phylum}(100);Actinobacteria{class}(100);Actinomycetales{order}(100);Micromonosporaceae{family}(100);Unassigned{genus}(0);Unassigned{species}(0)	Bacteria	Actinobacteria	Actinobacteria	Actinomycetales	Micromonosporaceae	Unassigned	Unassigned
ASV1158	0	0	0	0	0	0	0	0	0	88	0	68	0	50	0	206	Bacteria{superkingdom}(100);Planctomycetes{phylum}(100);Planctomycetia{class}(100);Planctomycetales{order}(100);Planctomycetaceae{family}(100);Unassigned{genus}(0);Unassigned{species}(0)	Bacteria	Planctomycetes	Planctomycetia	Planctomycetales	Planctomycetaceae	Unassigned	Unassigned
ASV1160	0	0	0	10	0	0	0	23	0	18	0	0	0	0	0	51	Bacteria{superkingdom}(94);Chloroflexi{phylum}(94);Unassigned{class}(0);Unassigned{order}(0);Unassigned{family}(0);Unassigned{genus}(0);Unassigned{species}(0)	Bacteria	Chloroflexi	Unassigned	Unassigned	Unassigned	Unassigned	Unassigned
ASV1161	23	0	25	60	311	0	0	0	0	0	0	0	0	0	0	419	Bacteria{superkingdom}(100);Proteobacteria{phylum}(100);Alphaproteobacteria{class}(100);Rhizobiales{order}(100);{family}(100);{genus}(100);Unassigned{species}(0)	Bacteria	Proteobacteria	Alphaproteobacteria	Rhizobiales			Unassigned
ASV1162	0	58	0	0	0	0	0	0	0	148	0	0	0	0	0	206	Bacteria{superkingdom}(98);Armatimonadetes{phylum}(98);Armatimonadia{class}(98);Armatimonadales{order}(98);Armatimonadaceae{family}(98);Armatimonas/Armatimonadetes_gp1{genus}(98);uncultured_bacterium{species}(98)	Bacteria	Armatimonadetes	Armatimonadia	Armatimonadales	Armatimonadaceae	Armatimonas/Armatimonadetes_gp1	uncultured_bacterium
ASV1163	0	17	0	0	0	0	51	94	29	58	0	9	0	0	30	288	Bacteria{superkingdom}(98);{phylum}(98);{class}(98);{order}(98);{family}(98);{genus}(98);uncultured_Gemmatimonas_sp.{species}(98)	Bacteria						uncultured_Gemmatimonas_sp.
ASV1164	0	116	0	0	67	0	0	53	66	74	82	0	198	0	101	757	Bacteria{superkingdom}(100);Proteobacteria{phylum}(100);Betaproteobacteria{class}(100);{order}(100);{family}(100);{genus}(100);Unassigned{species}(0)	Bacteria	Proteobacteria	Betaproteobacteria				Unassigned
ASV1165	0	19	0	0	0	0	0	1	0	3	0	0	8	0	0	31	Bacteria{superkingdom}(100);Armatimonadetes{phylum}(100);Armatimonadia{class}(100);Armatimonadales{order}(100);Armatimonadaceae{family}(100);Armatimonas/Armatimonadetes_gp1{genus}(100);Unassigned{species}(0)	Bacteria	Armatimonadetes	Armatimonadia	Armatimonadales	Armatimonadaceae	Armatimonas/Armatimonadetes_gp1	Unassigned
ASV1166	0	0	77	138	0	49	97	54	123	78	52	56	19	0	0	743	Bacteria{superkingdom}(98);Firmicutes{phylum}(98);Bacilli{class}(98);Bacillales{order}(98);Paenibacillaceae_1{family}(98);Paenibacillus{genus}(98);Unassigned{species}(0)	Bacteria	Firmicutes	Bacilli	Bacillales	Paenibacillaceae_1	Paenibacillus	Unassigned
ASV1168	40	0	0	59	0	0	22	9	15	0	0	144	0	17	50	356	Bacteria{superkingdom}(82);Acidobacteria{phylum}(82);Acidobacteria_Gp4{class}(82);{order}(82);{family}(82);Gp4{genus}(82);uncultured_Pelobacter_sp.{species}(82)	Bacteria	Acidobacteria	Acidobacteria_Gp4			Gp4	uncultured_Pelobacter_sp.
ASV1170	0	0	0	0	0	0	0	0	0	7	0	0	0	0	0	7	Bacteria{superkingdom}(100);Actinobacteria{phylum}(100);Actinobacteria{class}(100);Actinomycetales{order}(100);Unassigned{family}(0);Unassigned{genus}(0);Unassigned{species}(0)	Bacteria	Actinobacteria	Actinobacteria	Actinomycetales	Unassigned	Unassigned	Unassigned
ASV1171	58	0	34	77	123	0	0	0	14	0	52	0	0	0	0	358	Bacteria{superkingdom}(100);Planctomycetes{phylum}(100);Planctomycetia{class}(100);Planctomycetales{order}(100);Planctomycetaceae{family}(100);Singulisphaera{genus}(100);Unassigned{species}(0)	Bacteria	Planctomycetes	Planctomycetia	Planctomycetales	Planctomycetaceae	Singulisphaera	Unassigned
ASV1173	0	0	0	78	75	137	162	42	179	94	74	92	0	0	189	1122	Bacteria{superkingdom}(94);Acidobacteria{phylum}(94);Acidobacteria_Gp3{class}(94);{order}(94);{family}(94);{genus}(94);uncultured_Candidatus_Solibacter_sp.{species}(94)	Bacteria	Acidobacteria	Acidobacteria_Gp3				uncultured_Candidatus_Solibacter_sp.
ASV1174	29	130	0	0	61	49	61	50	0	98	9	0	22	65	195	769	Bacteria{superkingdom}(98);Actinobacteria{phylum}(98);Actinobacteria{class}(98);Actinomycetales{order}(98);Micromonosporaceae{family}(98);Virgisporangium{genus}(98);uncultured_bacterium{species}(98)	Bacteria	Actinobacteria	Actinobacteria	Actinomycetales	Micromonosporaceae	Virgisporangium	uncultured_bacterium
ASV1175	0	0	0	0	0	0	0	0	0	0	0	0	87	40	0	127	Bacteria{superkingdom}(100);Proteobacteria{phylum}(100);Alphaproteobacteria{class}(100);Rhizobiales{order}(100);Unassigned{family}(0);Unassigned{genus}(0);Unassigned{species}(0)	Bacteria	Proteobacteria	Alphaproteobacteria	Rhizobiales	Unassigned	Unassigned	Unassigned
ASV1177	0	682	36	0	0	0	0	0	0	0	0	0	0	0	0	718	Bacteria{superkingdom}(84);Actinobacteria{phylum}(84);Actinobacteria{class}(84);Solirubrobacterales{order}(84);Unassigned{family}(0);Unassigned{genus}(0);Unassigned{species}(0)	Bacteria	Actinobacteria	Actinobacteria	Solirubrobacterales	Unassigned	Unassigned	Unassigned
ASV1178	0	0	0	68	0	90	115	78	0	644	0	121	0	0	97	1213	Bacteria{superkingdom}(100);{phylum}(100);{class}(100);{order}(100);{family}(100);{genus}(100);uncultured_Actinomyces_sp.{species}(100)	Bacteria						uncultured_Actinomyces_sp.
ASV1179	23	0	0	223	0	247	61	125	197	256	475	65	0	0	93	1765	Bacteria{superkingdom}(100);Bacteroidetes{phylum}(100);Cytophagia{class}(100);Cytophagales{order}(100);{family}(100);Ohtaekwangia{genus}(100);Unassigned{species}(0)	Bacteria	Bacteroidetes	Cytophagia	Cytophagales		Ohtaekwangia	Unassigned
ASV1180	39	51	24	23	67	133	48	33	56	53	62	54	20	36	53	752	Bacteria{superkingdom}(94);Planctomycetes{phylum}(94);Planctomycetia{class}(94);Planctomycetales{order}(94);Planctomycetaceae{family}(94);Thermogutta{genus}(94);Unassigned{species}(0)	Bacteria	Planctomycetes	Planctomycetia	Planctomycetales	Planctomycetaceae	Thermogutta	Unassigned
ASV1182	197	0	284	106	207	0	0	0	0	0	0	0	0	0	0	794	Bacteria{superkingdom}(94);Firmicutes{phylum}(94);Bacilli{class}(94);Bacillales{order}(94);Bacillaceae_1{family}(94);Bacillus{genus}(94);Unassigned{species}(0)	Bacteria	Firmicutes	Bacilli	Bacillales	Bacillaceae_1	Bacillus	Unassigned
ASV1183	0	0	0	0	0	0	0	0	0	0	0	46	0	0	0	46	Bacteria{superkingdom}(100);Planctomycetes{phylum}(100);Planctomycetia{class}(100);Planctomycetales{order}(100);Planctomycetaceae{family}(100);Pirellula{genus}(100);Unassigned{species}(0)	Bacteria	Planctomycetes	Planctomycetia	Planctomycetales	Planctomycetaceae	Pirellula	Unassigned
ASV1184	0	0	0	39	0	35	48	0	191	0	588	25	24	0	66	1016	Bacteria{superkingdom}(100);Chloroflexi{phylum}(100);{class}(100);{order}(100);{family}(100);{genus}(100);Unassigned{species}(0)	Bacteria	Chloroflexi					Unassigned
ASV1185	104	0	65	0	338	17	84	29	21	256	0	0	0	0	118	1032	Bacteria{superkingdom}(100);Chloroflexi{phylum}(100);Chloroflexia{class}(100);Kallotenuales{order}(100);Kallotenuaceae{family}(100);Kallotenue{genus}(100);uncultured_bacterium{species}(100)	Bacteria	Chloroflexi	Chloroflexia	Kallotenuales	Kallotenuaceae	Kallotenue	uncultured_bacterium
ASV1186	24	0	57	0	81	0	0	0	0	0	0	0	0	0	0	162	Bacteria{superkingdom}(100);Armatimonadetes{phylum}(100);{class}(100);{order}(100);{family}(100);Armatimonadetes_gp4{genus}(100);Unassigned{species}(0)	Bacteria	Armatimonadetes				Armatimonadetes_gp4	Unassigned
ASV1187	3	62	0	0	0	0	0	41	0	0	0	0	0	12	0	118	Bacteria{superkingdom}(100);Actinobacteria{phylum}(100);Actinobacteria{class}(100);Actinomycetales{order}(100);Pseudonocardiaceae{family}(100);Pseudonocardia{genus}(100);Unassigned{species}(0)	Bacteria	Actinobacteria	Actinobacteria	Actinomycetales	Pseudonocardiaceae	Pseudonocardia	Unassigned
ASV1188	0	0	0	44	0	0	0	0	0	0	0	0	0	10	0	54	Bacteria{superkingdom}(100);Bacteroidetes{phylum}(100);Sphingobacteriia{class}(100);Sphingobacteriales{order}(100);Chitinophagaceae{family}(100);Unassigned{genus}(0);Unassigned{species}(0)	Bacteria	Bacteroidetes	Sphingobacteriia	Sphingobacteriales	Chitinophagaceae	Unassigned	Unassigned
ASV1189	0	15	0	0	0	0	0	0	0	0	0	0	0	0	0	15	Bacteria{superkingdom}(93);Proteobacteria{phylum}(93);Deltaproteobacteria{class}(93);{order}(93);{family}(93);{genus}(93);uncultured_Desulfuromonadales_bacterium{species}(93)	Bacteria	Proteobacteria	Deltaproteobacteria				uncultured_Desulfuromonadales_bacterium
ASV1190	0	0	0	0	284	0	0	0	0	0	0	0	0	0	0	284	Bacteria{superkingdom}(100);Proteobacteria{phylum}(100);Deltaproteobacteria{class}(100);{order}(100);{family}(100);{genus}(100);uncultured_Syntrophobacterales_bacterium{species}(100)	Bacteria	Proteobacteria	Deltaproteobacteria				uncultured_Syntrophobacterales_bacterium
ASV1193	38	0	84	143	0	0	0	42	53	0	336	0	29	0	0	725	Bacteria{superkingdom}(98);Chloroflexi{phylum}(98);Chloroflexia{class}(98);Kallotenuales{order}(98);Kallotenuaceae{family}(98);Kallotenue{genus}(98);uncultured_bacterium{species}(98)	Bacteria	Chloroflexi	Chloroflexia	Kallotenuales	Kallotenuaceae	Kallotenue	uncultured_bacterium
ASV1194	15	60	15	0	0	0	0	0	0	16	0	0	0	0	0	106	Bacteria{superkingdom}(100);Actinobacteria{phylum}(100);Actinobacteria{class}(100);Rubrobacterales{order}(100);Rubrobacteraceae{family}(100);Rubrobacter{genus}(100);Unassigned{species}(0)	Bacteria	Actinobacteria	Actinobacteria	Rubrobacterales	Rubrobacteraceae	Rubrobacter	Unassigned
ASV1195	40	32	15	41	109	20	61	41	31	30	0	0	0	0	0	420	Bacteria{superkingdom}(100);Actinobacteria{phylum}(100);Actinobacteria{class}(100);Actinomycetales{order}(100);Micromonosporaceae{family}(100);Unassigned{genus}(0);Unassigned{species}(0)	Bacteria	Actinobacteria	Actinobacteria	Actinomycetales	Micromonosporaceae	Unassigned	Unassigned
ASV1196	0	0	0	0	0	0	29	14	0	0	0	0	0	0	0	43	Bacteria{superkingdom}(94);Armatimonadetes{phylum}(94);{class}(94);{order}(94);{family}(94);Armatimonadetes_gp4{genus}(94);uncultured_bacterium{species}(94)	Bacteria	Armatimonadetes				Armatimonadetes_gp4	uncultured_bacterium
ASV1197	10	0	0	0	0	0	0	36	20	0	0	0	0	0	0	66	Bacteria{superkingdom}(83);Actinobacteria{phylum}(83);Actinobacteria{class}(83);Solirubrobacterales{order}(83);Solirubrobacteraceae{family}(83);Solirubrobacter{genus}(83);Unassigned{species}(0)	Bacteria	Actinobacteria	Actinobacteria	Solirubrobacterales	Solirubrobacteraceae	Solirubrobacter	Unassigned
ASV1198	0	124	17	80	0	0	0	47	32	98	0	36	260	0	40	734	Bacteria{superkingdom}(100);Proteobacteria{phylum}(100);Alphaproteobacteria{class}(100);Alphaproteobacteria_incertae_sedis{order}(100);{family}(100);Geminicoccus{genus}(100);Unassigned{species}(0)	Bacteria	Proteobacteria	Alphaproteobacteria	Alphaproteobacteria_incertae_sedis		Geminicoccus	Unassigned
ASV1199	27	73	158	57	198	38	24	9	73	43	5	0	39	5	23	772	Bacteria{superkingdom}(98);Chloroflexi{phylum}(98);Chloroflexia{class}(98);Kallotenuales{order}(98);Kallotenuaceae{family}(98);Kallotenue{genus}(98);uncultured_bacterium{species}(98)	Bacteria	Chloroflexi	Chloroflexia	Kallotenuales	Kallotenuaceae	Kallotenue	uncultured_bacterium
ASV1200	86	66	111	0	272	0	0	0	32	0	23	25	41	24	32	712	Bacteria{superkingdom}(100);Bacteroidetes{phylum}(100);Sphingobacteriia{class}(100);Sphingobacteriales{order}(100);Sphingobacteriaceae{family}(100);Pedobacter{genus}(100);Unassigned{species}(0)	Bacteria	Bacteroidetes	Sphingobacteriia	Sphingobacteriales	Sphingobacteriaceae	Pedobacter	Unassigned
ASV1201	0	0	0	0	0	0	103	60	0	252	0	24	0	0	0	439	Bacteria{superkingdom}(96);Chloroflexi{phylum}(96);Anaerolineae{class}(96);Anaerolineales{order}(96);Anaerolineaceae{family}(96);{genus}(96);uncultured_soil_bacterium{species}(96)	Bacteria	Chloroflexi	Anaerolineae	Anaerolineales	Anaerolineaceae		uncultured_soil_bacterium
ASV1202	0	0	0	0	0	115	122	88	55	238	23	43	0	31	47	762	Bacteria{superkingdom}(82);Actinobacteria{phylum}(82);Actinobacteria{class}(82);{order}(82);{family}(82);{genus}(82);uncultured_Frankia_sp.{species}(82)	Bacteria	Actinobacteria	Actinobacteria				uncultured_Frankia_sp.
ASV1203	22	0	93	138	137	0	30	6	21	0	10	0	0	0	0	457	Bacteria{superkingdom}(95);Proteobacteria{phylum}(95);Alphaproteobacteria{class}(95);Sphingomonadales{order}(95);Sphingomonadaceae{family}(95);Sphingomonas{genus}(95);Sphingomonas_koreensis{species}(95)	Bacteria	Proteobacteria	Alphaproteobacteria	Sphingomonadales	Sphingomonadaceae	Sphingomonas	Sphingomonas_koreensis
ASV1204	60	0	21	51	45	9	85	17	0	45	0	0	0	0	0	333	Bacteria{superkingdom}(100);Actinobacteria{phylum}(100);Actinobacteria{class}(100);Unassigned{order}(0);Unassigned{family}(0);Unassigned{genus}(0);Unassigned{species}(0)	Bacteria	Actinobacteria	Actinobacteria	Unassigned	Unassigned	Unassigned	Unassigned
ASV1205	0	0	0	21	0	0	0	13	0	0	0	0	0	0	0	34	Bacteria{superkingdom}(99);Actinobacteria{phylum}(99);Actinobacteria{class}(99);Actinomycetales{order}(99);Pseudonocardiaceae{family}(99);Kibdelosporangium{genus}(99);Unassigned{species}(0)	Bacteria	Actinobacteria	Actinobacteria	Actinomycetales	Pseudonocardiaceae	Kibdelosporangium	Unassigned
ASV1206	11	0	38	0	83	9	0	0	0	159	0	18	29	29	0	376	Bacteria{superkingdom}(99);Actinobacteria{phylum}(99);Actinobacteria{class}(99);Actinomycetales{order}(99);Nocardioidaceae{family}(99);Marmoricola{genus}(99);Unassigned{species}(0)	Bacteria	Actinobacteria	Actinobacteria	Actinomycetales	Nocardioidaceae	Marmoricola	Unassigned
ASV1207	75	0	30	0	0	0	0	0	0	68	0	0	0	0	0	173	Bacteria{superkingdom}(91);Proteobacteria{phylum}(91);Betaproteobacteria{class}(91);{order}(91);{family}(91);{genus}(91);uncultured_Alcaligenaceae_bacterium{species}(91)	Bacteria	Proteobacteria	Betaproteobacteria				uncultured_Alcaligenaceae_bacterium
ASV1208	0	26	17	86	131	13	0	0	0	37	0	25	27	43	13	418	Bacteria{superkingdom}(100);Proteobacteria{phylum}(100);Alphaproteobacteria{class}(100);Caulobacterales{order}(100);Caulobacteraceae{family}(100);Brevundimonas{genus}(100);Unassigned{species}(0)	Bacteria	Proteobacteria	Alphaproteobacteria	Caulobacterales	Caulobacteraceae	Brevundimonas	Unassigned
ASV1209	0	0	0	0	0	0	0	0	0	27	0	0	0	0	0	27	Bacteria{superkingdom}(98);Proteobacteria{phylum}(98);Alphaproteobacteria{class}(98);Rhizobiales{order}(98);{family}(98);{genus}(98);uncultured_endolithic_bacterium{species}(98)	Bacteria	Proteobacteria	Alphaproteobacteria	Rhizobiales			uncultured_endolithic_bacterium
ASV1210	25	0	44	99	67	111	0	0	26	38	105	77	51	31	44	718	Bacteria{superkingdom}(88);Chloroflexi{phylum}(88);{class}(88);{order}(88);{family}(88);{genus}(88);Unassigned{species}(0)	Bacteria	Chloroflexi					Unassigned
ASV1211	36	0	56	0	0	0	0	0	162	0	0	0	0	0	18	272	Bacteria{superkingdom}(100);Planctomycetes{phylum}(100);Planctomycetia{class}(100);Planctomycetales{order}(100);Planctomycetaceae{family}(100);Unassigned{genus}(0);Unassigned{species}(0)	Bacteria	Planctomycetes	Planctomycetia	Planctomycetales	Planctomycetaceae	Unassigned	Unassigned
ASV1212	10	0	0	0	0	150	110	9	0	0	0	0	0	0	0	279	Bacteria{superkingdom}(100);Chloroflexi{phylum}(100);Unassigned{class}(0);Unassigned{order}(0);Unassigned{family}(0);Unassigned{genus}(0);Unassigned{species}(0)	Bacteria	Chloroflexi	Unassigned	Unassigned	Unassigned	Unassigned	Unassigned
ASV1215	0	0	0	0	100	19	0	46	8	63	93	0	0	101	113	543	Bacteria{superkingdom}(91);Armatimonadetes{phylum}(91);{class}(91);{order}(91);{family}(91);Armatimonadetes_gp4{genus}(91);uncultured_actinobacterium{species}(91)	Bacteria	Armatimonadetes				Armatimonadetes_gp4	uncultured_actinobacterium
ASV1216	0	0	0	0	0	0	0	0	0	18	0	0	0	0	0	18	Bacteria{superkingdom}(99);Armatimonadetes{phylum}(99);{class}(99);{order}(99);{family}(99);Armatimonadetes_gp4{genus}(99);uncultured_bacterium{species}(99)	Bacteria	Armatimonadetes				Armatimonadetes_gp4	uncultured_bacterium
ASV1217	0	0	0	0	0	0	0	0	0	0	0	54	0	0	0	54	Bacteria{superkingdom}(100);Actinobacteria{phylum}(100);Actinobacteria{class}(100);Actinomycetales{order}(100);Nocardioidaceae{family}(100);Nocardioides{genus}(100);Unassigned{species}(0)	Bacteria	Actinobacteria	Actinobacteria	Actinomycetales	Nocardioidaceae	Nocardioides	Unassigned
ASV1219	15	0	0	0	0	0	0	0	134	0	0	0	0	0	0	149	Bacteria{superkingdom}(100);Proteobacteria{phylum}(100);Betaproteobacteria{class}(100);{order}(100);{family}(100);{genus}(100);Unassigned{species}(0)	Bacteria	Proteobacteria	Betaproteobacteria				Unassigned
ASV1220	0	0	39	0	0	0	0	0	0	0	0	0	0	0	0	39	Bacteria{superkingdom}(100);Actinobacteria{phylum}(100);Actinobacteria{class}(100);Actinomycetales{order}(100);Unassigned{family}(0);Unassigned{genus}(0);Unassigned{species}(0)	Bacteria	Actinobacteria	Actinobacteria	Actinomycetales	Unassigned	Unassigned	Unassigned
ASV1221	0	0	0	0	0	59	57	69	142	38	96	71	188	59	48	827	Bacteria{superkingdom}(100);Chloroflexi{phylum}(100);Chloroflexia{class}(100);{order}(100);{family}(100);{genus}(100);uncultured_bacterium{species}(100)	Bacteria	Chloroflexi	Chloroflexia				uncultured_bacterium
ASV1222	153	66	86	0	178	0	30	0	0	0	0	0	0	0	0	513	Bacteria{superkingdom}(84);Bacteroidetes{phylum}(84);Sphingobacteriia{class}(84);Sphingobacteriales{order}(84);Chitinophagaceae{family}(84);Cnuella{genus}(84);uncultured_Chitinophaga_sp.{species}(84)	Bacteria	Bacteroidetes	Sphingobacteriia	Sphingobacteriales	Chitinophagaceae	Cnuella	uncultured_Chitinophaga_sp.
ASV1223	0	73	19	0	0	33	221	114	0	91	16	482	314	61	69	1493	Bacteria{superkingdom}(100);Bacteroidetes{phylum}(100);Sphingobacteriia{class}(100);Sphingobacteriales{order}(100);Chitinophagaceae{family}(100);Unassigned{genus}(0);Unassigned{species}(0)	Bacteria	Bacteroidetes	Sphingobacteriia	Sphingobacteriales	Chitinophagaceae	Unassigned	Unassigned
ASV1224	0	23	0	0	0	0	29	12	0	0	0	0	0	0	0	64	Bacteria{superkingdom}(98);Proteobacteria{phylum}(98);Alphaproteobacteria{class}(98);Rhodospirillales{order}(98);{family}(98);{genus}(98);Unassigned{species}(0)	Bacteria	Proteobacteria	Alphaproteobacteria	Rhodospirillales			Unassigned
ASV1225	0	0	0	0	0	0	48	40	8	0	0	0	0	0	0	96	Bacteria{superkingdom}(100);Acidobacteria{phylum}(100);Acidobacteria_Gp7{class}(100);{order}(100);{family}(100);Gp7{genus}(100);Unassigned{species}(0)	Bacteria	Acidobacteria	Acidobacteria_Gp7			Gp7	Unassigned
ASV1226	0	0	0	0	0	0	0	79	0	0	0	0	0	0	0	79	Bacteria{superkingdom}(93);Acidobacteria{phylum}(93);Acidobacteria_Gp4{class}(93);{order}(93);{family}(93);Gp4{genus}(93);uncultured_Rhodopseudomonas_sp.{species}(93)	Bacteria	Acidobacteria	Acidobacteria_Gp4			Gp4	uncultured_Rhodopseudomonas_sp.
ASV1228	0	12	0	0	0	0	0	10	0	0	0	0	0	0	0	22	Bacteria{superkingdom}(99);Proteobacteria{phylum}(99);Betaproteobacteria{class}(99);Burkholderiales{order}(99);{family}(99);{genus}(99);Unassigned{species}(0)	Bacteria	Proteobacteria	Betaproteobacteria	Burkholderiales			Unassigned
ASV1229	0	30	0	0	22	0	0	8	22	0	0	0	0	10	0	92	Bacteria{superkingdom}(99);Proteobacteria{phylum}(99);Alphaproteobacteria{class}(99);Rhodospirillales{order}(99);{family}(99);{genus}(99);Unassigned{species}(0)	Bacteria	Proteobacteria	Alphaproteobacteria	Rhodospirillales			Unassigned
ASV1230	0	157	10	0	0	0	0	0	0	0	0	0	0	0	0	167	Bacteria{superkingdom}(96);Actinobacteria{phylum}(96);Actinobacteria{class}(96);Actinomycetales{order}(96);Pseudonocardiaceae{family}(96);Amycolatopsis{genus}(96);Unassigned{species}(0)	Bacteria	Actinobacteria	Actinobacteria	Actinomycetales	Pseudonocardiaceae	Amycolatopsis	Unassigned
ASV1231	244	47	42	0	0	0	0	0	0	0	0	0	0	0	0	333	Bacteria{superkingdom}(100);Bacteroidetes{phylum}(100);Sphingobacteriia{class}(100);Sphingobacteriales{order}(100);Chitinophagaceae{family}(100);Chitinophaga{genus}(100);Unassigned{species}(0)	Bacteria	Bacteroidetes	Sphingobacteriia	Sphingobacteriales	Chitinophagaceae	Chitinophaga	Unassigned
ASV1233	24	0	0	55	53	18	0	24	0	27	0	0	18	0	0	219	Bacteria{superkingdom}(100);Planctomycetes{phylum}(100);Planctomycetia{class}(100);Planctomycetales{order}(100);Planctomycetaceae{family}(100);{genus}(100);uncultured_Pasteuria_sp.{species}(100)	Bacteria	Planctomycetes	Planctomycetia	Planctomycetales	Planctomycetaceae		uncultured_Pasteuria_sp.
ASV1235	15	0	0	0	0	11	13	21	0	0	0	0	0	0	0	60	Bacteria{superkingdom}(100);Actinobacteria{phylum}(100);Actinobacteria{class}(100);Gaiellales{order}(100);Gaiellaceae{family}(100);Gaiella{genus}(100);Unassigned{species}(0)	Bacteria	Actinobacteria	Actinobacteria	Gaiellales	Gaiellaceae	Gaiella	Unassigned
ASV1237	0	0	0	0	0	0	0	0	0	0	0	290	0	0	0	290	Bacteria{superkingdom}(100);Proteobacteria{phylum}(100);Deltaproteobacteria{class}(100);Myxococcales{order}(100);Cystobacteraceae{family}(100);Cystobacter{genus}(100);Unassigned{species}(0)	Bacteria	Proteobacteria	Deltaproteobacteria	Myxococcales	Cystobacteraceae	Cystobacter	Unassigned
ASV1238	0	34	0	0	0	0	0	0	0	0	0	0	0	0	0	34	Bacteria{superkingdom}(100);Actinobacteria{phylum}(100);Actinobacteria{class}(100);Actinomycetales{order}(100);Propionibacteriaceae{family}(100);Unassigned{genus}(0);Unassigned{species}(0)	Bacteria	Actinobacteria	Actinobacteria	Actinomycetales	Propionibacteriaceae	Unassigned	Unassigned
ASV1239	0	0	0	0	0	0	0	45	0	0	0	155	0	0	0	200	Bacteria{superkingdom}(100);Proteobacteria{phylum}(100);Deltaproteobacteria{class}(100);Myxococcales{order}(100);Unassigned{family}(0);Unassigned{genus}(0);Unassigned{species}(0)	Bacteria	Proteobacteria	Deltaproteobacteria	Myxococcales	Unassigned	Unassigned	Unassigned
ASV1243	0	0	0	82	70	0	0	0	0	0	0	0	0	0	0	152	Bacteria{superkingdom}(100);Planctomycetes{phylum}(100);Planctomycetia{class}(100);Planctomycetales{order}(100);Planctomycetaceae{family}(100);{genus}(100);uncultured_Pasteuria_sp.{species}(100)	Bacteria	Planctomycetes	Planctomycetia	Planctomycetales	Planctomycetaceae		uncultured_Pasteuria_sp.
ASV1244	0	0	0	0	0	0	49	0	0	0	0	49	0	0	0	98	Bacteria{superkingdom}(100);Actinobacteria{phylum}(100);Actinobacteria{class}(100);Actinomycetales{order}(100);Nocardioidaceae{family}(100);Nocardioides{genus}(100);Unassigned{species}(0)	Bacteria	Actinobacteria	Actinobacteria	Actinomycetales	Nocardioidaceae	Nocardioides	Unassigned
ASV1245	0	58	0	0	0	15	0	0	24	46	0	93	164	41	86	527	Bacteria{superkingdom}(92);{phylum}(92);{class}(92);{order}(92);{family}(92);{genus}(92);uncultured_Gemmatimonadetes_bacterium{species}(92)	Bacteria						uncultured_Gemmatimonadetes_bacterium
ASV1247	12	0	23	32	29	0	0	0	0	0	0	28	32	0	0	156	Bacteria{superkingdom}(85);Actinobacteria{phylum}(85);Actinobacteria{class}(85);Actinomycetales{order}(85);Microbacteriaceae{family}(85);Lysinimonas{genus}(85);uncultured_Microbacteriaceae_bacterium{species}(85)	Bacteria	Actinobacteria	Actinobacteria	Actinomycetales	Microbacteriaceae	Lysinimonas	uncultured_Microbacteriaceae_bacterium
ASV1248	0	187	0	0	0	0	0	0	0	0	0	0	0	1	0	188	Bacteria{superkingdom}(96);Actinobacteria{phylum}(96);Actinobacteria{class}(96);Actinomycetales{order}(96);Pseudonocardiaceae{family}(96);Lentzea{genus}(96);Unassigned{species}(0)	Bacteria	Actinobacteria	Actinobacteria	Actinomycetales	Pseudonocardiaceae	Lentzea	Unassigned
ASV1249	14	62	39	0	70	32	64	29	48	79	0	0	0	0	0	437	Bacteria{superkingdom}(92);Proteobacteria{phylum}(92);Betaproteobacteria{class}(92);{order}(92);{family}(92);{genus}(92);uncultured_Alcaligenaceae_bacterium{species}(92)	Bacteria	Proteobacteria	Betaproteobacteria				uncultured_Alcaligenaceae_bacterium
ASV1250	31	0	8	0	0	0	0	0	0	0	0	0	0	0	0	39	Bacteria{superkingdom}(84);candidate_division_WPS-1{phylum}(84);{class}(84);{order}(84);{family}(84);WPS-1_genera_incertae_sedis{genus}(84);uncultured_bacterium{species}(84)	Bacteria	candidate_division_WPS-1				WPS-1_genera_incertae_sedis	uncultured_bacterium
ASV1251	0	0	0	0	0	0	6788	0	0	0	0	0	0	0	0	6788	Bacteria{superkingdom}(82);Acidobacteria{phylum}(82);Acidobacteria_Gp4{class}(82);{order}(82);{family}(82);Gp4{genus}(82);uncultured_soil_bacterium{species}(82)	Bacteria	Acidobacteria	Acidobacteria_Gp4			Gp4	uncultured_soil_bacterium
ASV1252	0	87	0	0	0	0	194	52	0	63	0	0	0	7	0	403	Bacteria{superkingdom}(92);Proteobacteria{phylum}(92);Alphaproteobacteria{class}(92);Sphingomonadales{order}(92);Sphingomonadaceae{family}(92);Sphingosinicella{genus}(92);Unassigned{species}(0)	Bacteria	Proteobacteria	Alphaproteobacteria	Sphingomonadales	Sphingomonadaceae	Sphingosinicella	Unassigned
ASV1253	162	0	0	0	0	0	0	0	0	0	0	0	0	0	17	179	Bacteria{superkingdom}(100);Bacteroidetes{phylum}(100);Sphingobacteriia{class}(100);Sphingobacteriales{order}(100);Chitinophagaceae{family}(100);Unassigned{genus}(0);Unassigned{species}(0)	Bacteria	Bacteroidetes	Sphingobacteriia	Sphingobacteriales	Chitinophagaceae	Unassigned	Unassigned
ASV1254	0	0	0	41	0	0	54	0	0	0	0	0	0	0	0	95	Bacteria{superkingdom}(98);Bacteroidetes{phylum}(98);Sphingobacteriia{class}(98);Sphingobacteriales{order}(98);Chitinophagaceae{family}(98);Niastella{genus}(98);Unassigned{species}(0)	Bacteria	Bacteroidetes	Sphingobacteriia	Sphingobacteriales	Chitinophagaceae	Niastella	Unassigned
ASV1255	27	161	29	0	100	14	0	76	17	0	0	0	0	0	41	465	Bacteria{superkingdom}(87);{phylum}(87);{class}(87);{order}(87);{family}(87);{genus}(87);Unassigned{species}(0)	Bacteria						Unassigned
ASV1256	28	87	24	41	0	0	40	20	0	0	0	0	0	0	0	240	Bacteria{superkingdom}(100);Actinobacteria{phylum}(100);Actinobacteria{class}(100);Solirubrobacterales{order}(100);Unassigned{family}(0);Unassigned{genus}(0);Unassigned{species}(0)	Bacteria	Actinobacteria	Actinobacteria	Solirubrobacterales	Unassigned	Unassigned	Unassigned
ASV1257	0	0	0	13	0	0	0	0	12	0	0	35	5	7	0	72	Bacteria{superkingdom}(100);Deinococcus-Thermus{phylum}(100);Deinococci{class}(100);Deinococcales{order}(100);Trueperaceae{family}(100);Truepera{genus}(100);Unassigned{species}(0)	Bacteria	Deinococcus-Thermus	Deinococci	Deinococcales	Trueperaceae	Truepera	Unassigned
ASV1258	0	0	0	0	0	28	22	12	0	24	0	0	22	0	19	127	Bacteria{superkingdom}(95);Actinobacteria{phylum}(95);Actinobacteria{class}(95);Actinomycetales{order}(95);Sporichthyaceae{family}(95);Sporichthya{genus}(95);uncultured_actinobacterium{species}(95)	Bacteria	Actinobacteria	Actinobacteria	Actinomycetales	Sporichthyaceae	Sporichthya	uncultured_actinobacterium
ASV1260	0	0	0	0	0	0	0	0	197	0	0	0	54	0	19	270	Bacteria{superkingdom}(89);Actinobacteria{phylum}(89);Actinobacteria{class}(89);Solirubrobacterales{order}(89);{family}(89);{genus}(89);Unassigned{species}(0)	Bacteria	Actinobacteria	Actinobacteria	Solirubrobacterales			Unassigned
ASV1261	16	0	16	0	59	0	0	0	0	0	22	0	0	0	0	113	Bacteria{superkingdom}(97);Planctomycetes{phylum}(97);Planctomycetia{class}(97);Planctomycetales{order}(97);Planctomycetaceae{family}(97);{genus}(97);uncultured_Planctomyces_sp.{species}(97)	Bacteria	Planctomycetes	Planctomycetia	Planctomycetales	Planctomycetaceae		uncultured_Planctomyces_sp.
ASV1262	20	122	24	0	0	0	0	33	0	53	0	0	0	0	0	252	Bacteria{superkingdom}(100);Gemmatimonadetes{phylum}(100);Gemmatimonadetes{class}(100);Gemmatimonadales{order}(100);Gemmatimonadaceae{family}(100);Gemmatimonas{genus}(100);Unassigned{species}(0)	Bacteria	Gemmatimonadetes	Gemmatimonadetes	Gemmatimonadales	Gemmatimonadaceae	Gemmatimonas	Unassigned
ASV1263	0	0	0	0	0	0	262	46	80	116	0	0	0	0	0	504	Bacteria{superkingdom}(100);Acidobacteria{phylum}(100);Acidobacteria_Gp6{class}(100);{order}(100);{family}(100);Gp6{genus}(100);Unassigned{species}(0)	Bacteria	Acidobacteria	Acidobacteria_Gp6			Gp6	Unassigned
ASV1264	0	0	0	66	0	13	16	13	17	79	0	0	31	0	0	235	Bacteria{superkingdom}(99);Acidobacteria{phylum}(99);Acidobacteria_Gp6{class}(99);{order}(99);{family}(99);Gp6{genus}(99);Unassigned{species}(0)	Bacteria	Acidobacteria	Acidobacteria_Gp6			Gp6	Unassigned
ASV1265	18	579	41	0	95	0	0	0	0	30	0	0	0	0	0	763	Bacteria{superkingdom}(100);Verrucomicrobia{phylum}(100);Opitutae{class}(100);Opitutales{order}(100);Opitutaceae{family}(100);Opitutus{genus}(100);Unassigned{species}(0)	Bacteria	Verrucomicrobia	Opitutae	Opitutales	Opitutaceae	Opitutus	Unassigned
ASV1266	0	114	0	0	0	0	0	0	0	0	0	0	0	0	0	114	Bacteria{superkingdom}(100);Planctomycetes{phylum}(100);Planctomycetia{class}(100);Planctomycetales{order}(100);Planctomycetaceae{family}(100);Pirellula{genus}(100);Unassigned{species}(0)	Bacteria	Planctomycetes	Planctomycetia	Planctomycetales	Planctomycetaceae	Pirellula	Unassigned
ASV1267	0	0	0	0	0	0	0	2	0	0	0	0	5	0	0	7	Bacteria{superkingdom}(100);Chloroflexi{phylum}(100);Chloroflexia{class}(100);Kallotenuales{order}(100);Kallotenuaceae{family}(100);Kallotenue{genus}(100);uncultured_bacterium{species}(100)	Bacteria	Chloroflexi	Chloroflexia	Kallotenuales	Kallotenuaceae	Kallotenue	uncultured_bacterium
ASV1268	0	0	0	25	0	0	0	0	0	0	0	0	0	0	0	25	Bacteria{superkingdom}(99);Actinobacteria{phylum}(99);Actinobacteria{class}(99);Solirubrobacterales{order}(99);Conexibacteraceae{family}(99);Conexibacter{genus}(99);Unassigned{species}(0)	Bacteria	Actinobacteria	Actinobacteria	Solirubrobacterales	Conexibacteraceae	Conexibacter	Unassigned
ASV1269	0	32	0	0	0	15	0	3	126	0	0	0	29	0	53	258	Bacteria{superkingdom}(88);Proteobacteria{phylum}(88);Gammaproteobacteria{class}(88);Chromatiales{order}(88);{family}(88);{genus}(88);uncultured_bacterium{species}(88)	Bacteria	Proteobacteria	Gammaproteobacteria	Chromatiales			uncultured_bacterium
ASV1273	0	0	0	37	0	0	0	41	112	109	33	73	147	32	70	654	Bacteria{superkingdom}(100);Proteobacteria{phylum}(100);Alphaproteobacteria{class}(100);Rhizobiales{order}(100);Unassigned{family}(0);Unassigned{genus}(0);Unassigned{species}(0)	Bacteria	Proteobacteria	Alphaproteobacteria	Rhizobiales	Unassigned	Unassigned	Unassigned
ASV1274	0	0	0	0	0	0	41	0	0	126	0	0	0	0	0	167	Bacteria{superkingdom}(99);Actinobacteria{phylum}(99);Actinobacteria{class}(99);Acidimicrobiales{order}(99);Acidimicrobineae_incertae_sedis{family}(99);Aciditerrimonas{genus}(99);Unassigned{species}(0)	Bacteria	Actinobacteria	Actinobacteria	Acidimicrobiales	Acidimicrobineae_incertae_sedis	Aciditerrimonas	Unassigned
ASV1275	28	0	0	121	67	0	0	0	0	0	82	33	0	130	0	461	Bacteria{superkingdom}(98);Proteobacteria{phylum}(98);Alphaproteobacteria{class}(98);Rhodospirillales{order}(98);Rhodospirillaceae{family}(98);Dongia{genus}(98);Unassigned{species}(0)	Bacteria	Proteobacteria	Alphaproteobacteria	Rhodospirillales	Rhodospirillaceae	Dongia	Unassigned
ASV1276	0	0	0	0	0	0	0	0	0	0	0	0	0	0	21	21	Bacteria{superkingdom}(100);Bacteroidetes{phylum}(100);Sphingobacteriia{class}(100);Sphingobacteriales{order}(100);Chitinophagaceae{family}(100);Segetibacter{genus}(100);Unassigned{species}(0)	Bacteria	Bacteroidetes	Sphingobacteriia	Sphingobacteriales	Chitinophagaceae	Segetibacter	Unassigned
ASV1277	0	0	15	0	0	35	0	86	0	89	0	0	0	0	0	225	Bacteria{superkingdom}(98);Actinobacteria{phylum}(98);Actinobacteria{class}(98);Solirubrobacterales{order}(98);{family}(98);{genus}(98);Unassigned{species}(0)	Bacteria	Actinobacteria	Actinobacteria	Solirubrobacterales			Unassigned
ASV1278	19	118	109	59	43	0	49	0	0	35	0	0	20	0	0	452	Bacteria{superkingdom}(90);{phylum}(90);{class}(90);{order}(90);{family}(90);{genus}(90);uncultured_Actinomyces_sp.{species}(90)	Bacteria						uncultured_Actinomyces_sp.
ASV1279	42	0	24	39	251	0	0	0	37	0	21	0	0	0	0	414	Bacteria{superkingdom}(100);Planctomycetes{phylum}(100);Planctomycetia{class}(100);Planctomycetales{order}(100);Planctomycetaceae{family}(100);Gemmata{genus}(100);Unassigned{species}(0)	Bacteria	Planctomycetes	Planctomycetia	Planctomycetales	Planctomycetaceae	Gemmata	Unassigned
ASV1280	0	0	0	0	0	0	0	0	0	0	0	30	0	0	0	30	Bacteria{superkingdom}(100);Bacteroidetes{phylum}(100);Sphingobacteriia{class}(100);Sphingobacteriales{order}(100);Chitinophagaceae{family}(100);Flavisolibacter{genus}(100);Unassigned{species}(0)	Bacteria	Bacteroidetes	Sphingobacteriia	Sphingobacteriales	Chitinophagaceae	Flavisolibacter	Unassigned
ASV1281	94	132	68	0	120	483	140	8	43	55	0	0	0	0	0	1143	Bacteria{superkingdom}(99);Chloroflexi{phylum}(99);Chloroflexia{class}(99);{order}(99);{family}(99);{genus}(99);uncultured_bacterium{species}(99)	Bacteria	Chloroflexi	Chloroflexia				uncultured_bacterium
ASV1282	60	149	17	0	0	0	0	0	22	0	0	46	0	0	26	320	Bacteria{superkingdom}(100);{phylum}(100);{class}(100);{order}(100);{family}(100);{genus}(100);uncultured_Anaerolineae_bacterium{species}(100)	Bacteria						uncultured_Anaerolineae_bacterium
ASV1285	0	1017	0	0	0	0	0	0	14	58	6	0	0	16	20	1131	Bacteria{superkingdom}(100);Unassigned{phylum}(0);Unassigned{class}(0);Unassigned{order}(0);Unassigned{family}(0);Unassigned{genus}(0);Unassigned{species}(0)	Bacteria	Unassigned	Unassigned	Unassigned	Unassigned	Unassigned	Unassigned
ASV1286	123	37	35	361	1255	46	19	13	9	0	223	0	10	0	38	2169	Bacteria{superkingdom}(90);Proteobacteria{phylum}(90);Gammaproteobacteria{class}(90);Xanthomonadales{order}(90);Sinobacteraceae{family}(90);Steroidobacter{genus}(90);uncultured_gamma_proteobacterium{species}(90)	Bacteria	Proteobacteria	Gammaproteobacteria	Xanthomonadales	Sinobacteraceae	Steroidobacter	uncultured_gamma_proteobacterium
ASV1287	0	205	0	0	0	0	0	0	0	0	0	0	0	22	0	227	Bacteria{superkingdom}(95);Bacteroidetes{phylum}(95);Sphingobacteriia{class}(95);Sphingobacteriales{order}(95);Chitinophagaceae{family}(95);Flavisolibacter{genus}(95);Unassigned{species}(0)	Bacteria	Bacteroidetes	Sphingobacteriia	Sphingobacteriales	Chitinophagaceae	Flavisolibacter	Unassigned
ASV1288	41	51	23	34	0	57	80	68	31	58	32	26	11	13	34	559	Bacteria{superkingdom}(100);Unassigned{phylum}(0);Unassigned{class}(0);Unassigned{order}(0);Unassigned{family}(0);Unassigned{genus}(0);Unassigned{species}(0)	Bacteria	Unassigned	Unassigned	Unassigned	Unassigned	Unassigned	Unassigned
ASV1290	28	39	24	0	0	0	0	0	0	0	0	0	0	39	0	130	Bacteria{superkingdom}(100);Acidobacteria{phylum}(100);Acidobacteria_Gp6{class}(100);{order}(100);{family}(100);Gp6{genus}(100);Unassigned{species}(0)	Bacteria	Acidobacteria	Acidobacteria_Gp6			Gp6	Unassigned
ASV1291	0	15	0	0	0	0	6	0	10	0	0	0	0	0	0	31	Bacteria{superkingdom}(90);Bacteroidetes{phylum}(90);Cytophagia{class}(90);Cytophagales{order}(90);Cytophagaceae{family}(90);Rhodocytophaga{genus}(90);uncultured_Flexibacteraceae_bacterium{species}(90)	Bacteria	Bacteroidetes	Cytophagia	Cytophagales	Cytophagaceae	Rhodocytophaga	uncultured_Flexibacteraceae_bacterium
ASV1292	0	0	0	0	0	0	0	0	0	0	0	0	123	0	0	123	Bacteria{superkingdom}(100);Bacteroidetes{phylum}(100);Cytophagia{class}(100);Cytophagales{order}(100);Cytophagaceae{family}(100);Adhaeribacter{genus}(100);Unassigned{species}(0)	Bacteria	Bacteroidetes	Cytophagia	Cytophagales	Cytophagaceae	Adhaeribacter	Unassigned
ASV1293	29	0	0	21	0	0	0	0	0	69	0	61	0	31	0	211	Bacteria{superkingdom}(100);Planctomycetes{phylum}(100);Planctomycetia{class}(100);Planctomycetales{order}(100);Planctomycetaceae{family}(100);Pirellula{genus}(100);Unassigned{species}(0)	Bacteria	Planctomycetes	Planctomycetia	Planctomycetales	Planctomycetaceae	Pirellula	Unassigned
ASV1296	0	0	74	0	56	0	49	0	0	71	0	0	0	33	0	283	Bacteria{superkingdom}(100);Chloroflexi{phylum}(100);Chloroflexia{class}(100);{order}(100);{family}(100);{genus}(100);Unassigned{species}(0)	Bacteria	Chloroflexi	Chloroflexia				Unassigned
ASV1297	0	193	23	0	67	79	120	40	55	109	30	34	57	13	52	872	Bacteria{superkingdom}(91);Proteobacteria{phylum}(91);Alphaproteobacteria{class}(91);Rhizobiales{order}(91);Hyphomicrobiaceae{family}(91);Rhodoplanes{genus}(91);Unassigned{species}(0)	Bacteria	Proteobacteria	Alphaproteobacteria	Rhizobiales	Hyphomicrobiaceae	Rhodoplanes	Unassigned
ASV1298	28	98	0	41	51	0	32	33	0	71	0	20	31	64	108	577	Bacteria{superkingdom}(100);Proteobacteria{phylum}(100);Alphaproteobacteria{class}(100);Rhizobiales{order}(100);Unassigned{family}(0);Unassigned{genus}(0);Unassigned{species}(0)	Bacteria	Proteobacteria	Alphaproteobacteria	Rhizobiales	Unassigned	Unassigned	Unassigned
ASV1299	56	43	0	0	0	38	0	23	92	58	8	0	24	0	9	351	Bacteria{superkingdom}(82);Planctomycetes{phylum}(82);Planctomycetia{class}(82);Planctomycetales{order}(82);Planctomycetaceae{family}(82);{genus}(82);uncultured_Zavarzinella_sp.{species}(82)	Bacteria	Planctomycetes	Planctomycetia	Planctomycetales	Planctomycetaceae		uncultured_Zavarzinella_sp.
ASV1300	0	0	0	0	0	0	0	0	0	26	0	25	74	79	0	204	Bacteria{superkingdom}(100);Proteobacteria{phylum}(100);Alphaproteobacteria{class}(100);Rhodospirillales{order}(100);Rhodospirillaceae{family}(100);Unassigned{genus}(0);Unassigned{species}(0)	Bacteria	Proteobacteria	Alphaproteobacteria	Rhodospirillales	Rhodospirillaceae	Unassigned	Unassigned
ASV1301	0	0	0	0	0	0	0	0	0	0	0	112	187	163	0	462	Bacteria{superkingdom}(100);Acidobacteria{phylum}(100);Acidobacteria_Gp6{class}(100);{order}(100);{family}(100);Gp6{genus}(100);Unassigned{species}(0)	Bacteria	Acidobacteria	Acidobacteria_Gp6			Gp6	Unassigned
ASV1303	0	70	15	0	56	790	400	217	35	426	0	0	0	0	0	2009	Bacteria{superkingdom}(98);Chloroflexi{phylum}(98);Caldilineae{class}(98);Caldilineales{order}(98);Caldilineaceae{family}(98);{genus}(98);uncultured_Chloroflexi_bacterium{species}(98)	Bacteria	Chloroflexi	Caldilineae	Caldilineales	Caldilineaceae		uncultured_Chloroflexi_bacterium
ASV1304	28	0	46	18	72	100	164	56	28	138	65	0	101	9	76	901	Bacteria{superkingdom}(100);Unassigned{phylum}(0);Unassigned{class}(0);Unassigned{order}(0);Unassigned{family}(0);Unassigned{genus}(0);Unassigned{species}(0)	Bacteria	Unassigned	Unassigned	Unassigned	Unassigned	Unassigned	Unassigned
ASV1306	27	15	126	0	48	91	0	0	54	16	0	0	0	25	0	402	Bacteria{superkingdom}(98);Chloroflexi{phylum}(98);Unassigned{class}(0);Unassigned{order}(0);Unassigned{family}(0);Unassigned{genus}(0);Unassigned{species}(0)	Bacteria	Chloroflexi	Unassigned	Unassigned	Unassigned	Unassigned	Unassigned
ASV1307	0	0	0	0	0	14	0	25	29	73	0	0	0	0	77	218	Bacteria{superkingdom}(96);Actinobacteria{phylum}(96);Actinobacteria{class}(96);{order}(96);{family}(96);{genus}(96);Unassigned{species}(0)	Bacteria	Actinobacteria	Actinobacteria				Unassigned
ASV1308	13	0	64	10	0	17	15	47	27	18	14	36	0	40	12	313	Bacteria{superkingdom}(100);Planctomycetes{phylum}(100);Planctomycetia{class}(100);Planctomycetales{order}(100);Planctomycetaceae{family}(100);Pirellula{genus}(100);Unassigned{species}(0)	Bacteria	Planctomycetes	Planctomycetia	Planctomycetales	Planctomycetaceae	Pirellula	Unassigned
ASV1309	0	0	16	66	86	0	53	6	0	91	0	0	41	0	0	359	Bacteria{superkingdom}(91);Proteobacteria{phylum}(91);Alphaproteobacteria{class}(91);Sphingomonadales{order}(91);Erythrobacteraceae{family}(91);Altererythrobacter{genus}(91);Unassigned{species}(0)	Bacteria	Proteobacteria	Alphaproteobacteria	Sphingomonadales	Erythrobacteraceae	Altererythrobacter	Unassigned
ASV1310	12	0	10	21	0	20	38	272	9	22	0	0	0	0	0	404	Bacteria{superkingdom}(81);Proteobacteria{phylum}(81);Gammaproteobacteria{class}(81);Chromatiales{order}(81);Unassigned{family}(0);Unassigned{genus}(0);Unassigned{species}(0)	Bacteria	Proteobacteria	Gammaproteobacteria	Chromatiales	Unassigned	Unassigned	Unassigned
ASV1311	0	0	0	13	0	81	19	34	26	101	175	54	27	20	73	623	Bacteria{superkingdom}(100);Chloroflexi{phylum}(100);Anaerolineae{class}(100);Anaerolineales{order}(100);Anaerolineaceae{family}(100);{genus}(100);uncultured_Gemmatimonadetes_bacterium{species}(100)	Bacteria	Chloroflexi	Anaerolineae	Anaerolineales	Anaerolineaceae		uncultured_Gemmatimonadetes_bacterium
ASV1312	0	600	0	0	0	135	218	0	131	0	0	0	94	63	345	1586	Bacteria{superkingdom}(96);Proteobacteria{phylum}(96);Alphaproteobacteria{class}(96);Rhizobiales{order}(96);Rhodobiaceae{family}(96);{genus}(96);Unassigned{species}(0)	Bacteria	Proteobacteria	Alphaproteobacteria	Rhizobiales	Rhodobiaceae		Unassigned
ASV1313	0	0	0	0	0	0	0	0	0	0	0	36	0	40	0	76	Bacteria{superkingdom}(100);Actinobacteria{phylum}(100);Actinobacteria{class}(100);Actinomycetales{order}(100);Nocardioidaceae{family}(100);Nocardioides{genus}(100);Unassigned{species}(0)	Bacteria	Actinobacteria	Actinobacteria	Actinomycetales	Nocardioidaceae	Nocardioides	Unassigned
ASV1315	0	12	0	0	0	0	0	0	7	48	0	12	19	0	0	98	Bacteria{superkingdom}(100);Chloroflexi{phylum}(100);Unassigned{class}(0);Unassigned{order}(0);Unassigned{family}(0);Unassigned{genus}(0);Unassigned{species}(0)	Bacteria	Chloroflexi	Unassigned	Unassigned	Unassigned	Unassigned	Unassigned
ASV1316	20	0	0	27	0	0	0	0	14	0	0	0	0	0	0	61	Bacteria{superkingdom}(98);Actinobacteria{phylum}(98);Actinobacteria{class}(98);Unassigned{order}(0);Unassigned{family}(0);Unassigned{genus}(0);Unassigned{species}(0)	Bacteria	Actinobacteria	Actinobacteria	Unassigned	Unassigned	Unassigned	Unassigned
ASV1317	16	81	51	60	59	43	66	15	0	0	12	0	0	0	34	437	Bacteria{superkingdom}(95);Proteobacteria{phylum}(95);Alphaproteobacteria{class}(95);Rhodospirillales{order}(95);Rhodospirillaceae{family}(95);{genus}(95);uncultured_Nitrobacter_sp.{species}(95)	Bacteria	Proteobacteria	Alphaproteobacteria	Rhodospirillales	Rhodospirillaceae		uncultured_Nitrobacter_sp.
ASV1318	31	30	0	136	0	259	0	0	381	0	0	0	0	0	73	910	Bacteria{superkingdom}(99);{phylum}(99);{class}(99);{order}(99);{family}(99);{genus}(99);uncultured_Syntrophobacterales_bacterium{species}(99)	Bacteria						uncultured_Syntrophobacterales_bacterium
ASV1319	0	157	0	0	0	0	133	177	0	291	0	76	107	99	89	1129	Bacteria{superkingdom}(100);Actinobacteria{phylum}(100);Actinobacteria{class}(100);Actinomycetales{order}(100);Microbacteriaceae{family}(100);Unassigned{genus}(0);Unassigned{species}(0)	Bacteria	Actinobacteria	Actinobacteria	Actinomycetales	Microbacteriaceae	Unassigned	Unassigned
ASV1320	0	337	0	285	169	0	0	0	0	0	0	0	0	0	0	791	Bacteria{superkingdom}(100);Chloroflexi{phylum}(100);Thermomicrobia{class}(100);Sphaerobacterales{order}(100);Sphaerobacteraceae{family}(100);Sphaerobacter{genus}(100);uncultured_bacterium{species}(100)	Bacteria	Chloroflexi	Thermomicrobia	Sphaerobacterales	Sphaerobacteraceae	Sphaerobacter	uncultured_bacterium
ASV1321	0	0	0	0	0	0	0	0	0	0	0	0	64	76	0	140	Bacteria{superkingdom}(99);Bacteroidetes{phylum}(99);Cytophagia{class}(99);Cytophagales{order}(99);Cytophagaceae{family}(99);Nibrella{genus}(99);uncultured_bacterium{species}(99)	Bacteria	Bacteroidetes	Cytophagia	Cytophagales	Cytophagaceae	Nibrella	uncultured_bacterium
ASV1322	24	0	47	46	344	0	0	0	11	0	0	0	0	0	10	482	Bacteria{superkingdom}(100);Armatimonadetes{phylum}(100);{class}(100);{order}(100);{family}(100);Armatimonadetes_gp4{genus}(100);uncultured_bacterium{species}(100)	Bacteria	Armatimonadetes				Armatimonadetes_gp4	uncultured_bacterium
ASV1323	0	39	0	418	0	0	0	0	0	0	0	0	0	0	0	457	Bacteria{superkingdom}(100);Proteobacteria{phylum}(100);Gammaproteobacteria{class}(100);Xanthomonadales{order}(100);Xanthomonadaceae{family}(100);Lysobacter{genus}(100);Unassigned{species}(0)	Bacteria	Proteobacteria	Gammaproteobacteria	Xanthomonadales	Xanthomonadaceae	Lysobacter	Unassigned
ASV1324	54	71	53	59	51	103	51	31	104	69	128	23	0	18	0	815	Bacteria{superkingdom}(99);Armatimonadetes{phylum}(99);{class}(99);{order}(99);{family}(99);Armatimonadetes_gp4{genus}(99);uncultured_Firmicutes_bacterium{species}(99)	Bacteria	Armatimonadetes				Armatimonadetes_gp4	uncultured_Firmicutes_bacterium
ASV1325	0	211	0	0	0	0	0	10	0	4	0	0	0	0	0	225	Bacteria{superkingdom}(89);Armatimonadetes{phylum}(89);Armatimonadia{class}(89);Armatimonadales{order}(89);Armatimonadaceae{family}(89);Armatimonas/Armatimonadetes_gp1{genus}(89);uncultured_bacterium{species}(89)	Bacteria	Armatimonadetes	Armatimonadia	Armatimonadales	Armatimonadaceae	Armatimonas/Armatimonadetes_gp1	uncultured_bacterium
ASV1326	0	0	0	0	24	0	9	7	9	19	0	0	14	0	0	82	Bacteria{superkingdom}(100);Proteobacteria{phylum}(100);Betaproteobacteria{class}(100);Burkholderiales{order}(100);Burkholderiaceae{family}(100);Cupriavidus{genus}(100);Unassigned{species}(0)	Bacteria	Proteobacteria	Betaproteobacteria	Burkholderiales	Burkholderiaceae	Cupriavidus	Unassigned
ASV1327	0	0	0	0	0	0	0	0	0	0	0	0	11	16	0	27	Bacteria{superkingdom}(98);Chloroflexi{phylum}(98);Chloroflexia{class}(98);{order}(98);{family}(98);{genus}(98);uncultured_bacterium{species}(98)	Bacteria	Chloroflexi	Chloroflexia				uncultured_bacterium
ASV1328	0	0	0	0	0	0	0	20	18	0	15	0	18	0	0	71	Bacteria{superkingdom}(99);Actinobacteria{phylum}(99);Actinobacteria{class}(99);Solirubrobacterales{order}(99);Solirubrobacteraceae{family}(99);Solirubrobacter{genus}(99);Unassigned{species}(0)	Bacteria	Actinobacteria	Actinobacteria	Solirubrobacterales	Solirubrobacteraceae	Solirubrobacter	Unassigned
ASV1330	0	0	0	117	0	0	0	0	0	0	0	0	0	0	0	117	Bacteria{superkingdom}(100);Proteobacteria{phylum}(100);Betaproteobacteria{class}(100);Burkholderiales{order}(100);Oxalobacteraceae{family}(100);Massilia{genus}(100);Unassigned{species}(0)	Bacteria	Proteobacteria	Betaproteobacteria	Burkholderiales	Oxalobacteraceae	Massilia	Unassigned
ASV1332	0	0	0	0	0	0	30	0	0	0	0	0	0	0	0	30	Bacteria{superkingdom}(100);Actinobacteria{phylum}(100);Actinobacteria{class}(100);Actinomycetales{order}(100);Streptosporangiaceae{family}(100);Nonomuraea{genus}(100);Unassigned{species}(0)	Bacteria	Actinobacteria	Actinobacteria	Actinomycetales	Streptosporangiaceae	Nonomuraea	Unassigned
ASV1333	0	0	0	0	0	0	0	13	0	111	0	0	0	0	0	124	Bacteria{superkingdom}(100);Acidobacteria{phylum}(100);Acidobacteria_Gp4{class}(100);{order}(100);{family}(100);Gp4{genus}(100);Unassigned{species}(0)	Bacteria	Acidobacteria	Acidobacteria_Gp4			Gp4	Unassigned
ASV1334	30	1144	8	44	40	50	32	8	63	37	82	0	17	0	36	1591	Bacteria{superkingdom}(94);Proteobacteria{phylum}(94);Deltaproteobacteria{class}(94);Myxococcales{order}(94);Cystobacteraceae{family}(94);{genus}(94);uncultured_delta_proteobacterium{species}(94)	Bacteria	Proteobacteria	Deltaproteobacteria	Myxococcales	Cystobacteraceae		uncultured_delta_proteobacterium
ASV1335	0	23	0	0	0	0	0	0	0	0	0	0	0	0	0	23	Bacteria{superkingdom}(100);Acidobacteria{phylum}(100);Acidobacteria_Gp4{class}(100);{order}(100);{family}(100);Unassigned{genus}(0);Unassigned{species}(0)	Bacteria	Acidobacteria	Acidobacteria_Gp4			Unassigned	Unassigned
ASV1336	0	0	0	0	0	11	0	0	0	0	0	0	187	0	18	216	Bacteria{superkingdom}(91);Acidobacteria{phylum}(91);Acidobacteria_Gp16{class}(91);{order}(91);{family}(91);Gp16{genus}(91);Unassigned{species}(0)	Bacteria	Acidobacteria	Acidobacteria_Gp16			Gp16	Unassigned
ASV1337	6	0	0	0	0	11	7	4	0	86	0	0	124	21	18	277	Bacteria{superkingdom}(100);Unassigned{phylum}(0);Unassigned{class}(0);Unassigned{order}(0);Unassigned{family}(0);Unassigned{genus}(0);Unassigned{species}(0)	Bacteria	Unassigned	Unassigned	Unassigned	Unassigned	Unassigned	Unassigned
ASV1338	14	0	0	0	0	0	0	0	0	0	0	0	0	0	0	14	Bacteria{superkingdom}(100);Acidobacteria{phylum}(100);Acidobacteria_Gp7{class}(100);{order}(100);{family}(100);Gp7{genus}(100);Unassigned{species}(0)	Bacteria	Acidobacteria	Acidobacteria_Gp7			Gp7	Unassigned
ASV1339	0	0	0	0	0	0	0	0	0	0	0	9	0	0	0	9	Bacteria{superkingdom}(99);Actinobacteria{phylum}(99);Actinobacteria{class}(99);Actinomycetales{order}(99);Nocardioidaceae{family}(99);Nocardioides{genus}(99);Unassigned{species}(0)	Bacteria	Actinobacteria	Actinobacteria	Actinomycetales	Nocardioidaceae	Nocardioides	Unassigned
ASV1340	60	147	16	0	225	233	271	80	0	159	0	0	0	46	43	1280	Bacteria{superkingdom}(100);Acidobacteria{phylum}(100);Acidobacteria_Gp6{class}(100);{order}(100);{family}(100);Gp6{genus}(100);Unassigned{species}(0)	Bacteria	Acidobacteria	Acidobacteria_Gp6			Gp6	Unassigned
ASV1341	0	0	0	0	120	47	0	3	96	0	303	10	0	0	0	579	Bacteria{superkingdom}(100);Unassigned{phylum}(0);Unassigned{class}(0);Unassigned{order}(0);Unassigned{family}(0);Unassigned{genus}(0);Unassigned{species}(0)	Bacteria	Unassigned	Unassigned	Unassigned	Unassigned	Unassigned	Unassigned
ASV1343	0	0	24	130	117	0	30	34	0	0	48	21	0	92	26	522	Bacteria{superkingdom}(97);Planctomycetes{phylum}(97);Planctomycetia{class}(97);Planctomycetales{order}(97);Planctomycetaceae{family}(97);Blastopirellula{genus}(97);uncultured_bacterium{species}(97)	Bacteria	Planctomycetes	Planctomycetia	Planctomycetales	Planctomycetaceae	Blastopirellula	uncultured_bacterium
ASV1344	8	0	20	0	0	0	0	88	0	0	0	26	0	0	0	142	Bacteria{superkingdom}(96);Actinobacteria{phylum}(96);Actinobacteria{class}(96);Acidimicrobiales{order}(96);Acidimicrobineae_incertae_sedis{family}(96);Aciditerrimonas{genus}(96);uncultured_Acidimicrobineae_bacterium{species}(96)	Bacteria	Actinobacteria	Actinobacteria	Acidimicrobiales	Acidimicrobineae_incertae_sedis	Aciditerrimonas	uncultured_Acidimicrobineae_bacterium
ASV1345	0	104	0	0	0	0	0	0	0	21	0	0	0	0	0	125	Bacteria{superkingdom}(96);Proteobacteria{phylum}(96);Alphaproteobacteria{class}(96);Rhizobiales{order}(96);{family}(96);{genus}(96);uncultured_endolithic_bacterium{species}(96)	Bacteria	Proteobacteria	Alphaproteobacteria	Rhizobiales			uncultured_endolithic_bacterium
ASV1348	39	23	0	0	251	0	0	130	0	0	0	0	0	0	14	457	Bacteria{superkingdom}(99);Firmicutes{phylum}(99);Bacilli{class}(99);Bacillales{order}(99);Bacillaceae_1{family}(99);Bacillus{genus}(99);Unassigned{species}(0)	Bacteria	Firmicutes	Bacilli	Bacillales	Bacillaceae_1	Bacillus	Unassigned
ASV1349	20	28	0	30	75	0	0	0	0	0	0	0	0	0	0	153	Bacteria{superkingdom}(100);Acidobacteria{phylum}(100);Acidobacteria_Gp3{class}(100);{order}(100);{family}(100);{genus}(100);Acidobacteria_bacterium_IGE-016{species}(100)	Bacteria	Acidobacteria	Acidobacteria_Gp3				Acidobacteria_bacterium_IGE-016
ASV1350	125	0	95	0	0	0	0	0	0	0	0	0	0	0	0	220	Bacteria{superkingdom}(98);Firmicutes{phylum}(98);Bacilli{class}(98);Bacillales{order}(98);Paenibacillaceae_1{family}(98);Paenibacillus{genus}(98);Unassigned{species}(0)	Bacteria	Firmicutes	Bacilli	Bacillales	Paenibacillaceae_1	Paenibacillus	Unassigned
ASV1351	0	0	0	0	0	0	0	0	0	0	0	59	149	0	0	208	Bacteria{superkingdom}(100);Actinobacteria{phylum}(100);Actinobacteria{class}(100);Actinomycetales{order}(100);Pseudonocardiaceae{family}(100);Pseudonocardia{genus}(100);Unassigned{species}(0)	Bacteria	Actinobacteria	Actinobacteria	Actinomycetales	Pseudonocardiaceae	Pseudonocardia	Unassigned
ASV1352	0	0	0	0	35	0	0	0	0	0	0	0	0	0	0	35	Bacteria{superkingdom}(100);Chloroflexi{phylum}(100);{class}(100);{order}(100);{family}(100);{genus}(100);uncultured_endolithic_bacterium{species}(100)	Bacteria	Chloroflexi					uncultured_endolithic_bacterium
ASV1353	0	134	0	0	0	0	57	0	0	172	0	106	107	65	61	702	Bacteria{superkingdom}(100);Actinobacteria{phylum}(100);Actinobacteria{class}(100);Actinomycetales{order}(100);Nocardioidaceae{family}(100);Nocardioides{genus}(100);Unassigned{species}(0)	Bacteria	Actinobacteria	Actinobacteria	Actinomycetales	Nocardioidaceae	Nocardioides	Unassigned
ASV1354	0	0	0	0	0	0	0	51	0	0	0	0	0	47	32	130	Bacteria{superkingdom}(100);Unassigned{phylum}(0);Unassigned{class}(0);Unassigned{order}(0);Unassigned{family}(0);Unassigned{genus}(0);Unassigned{species}(0)	Bacteria	Unassigned	Unassigned	Unassigned	Unassigned	Unassigned	Unassigned
ASV1355	0	0	0	595	0	0	0	0	18	0	0	0	0	0	0	613	Bacteria{superkingdom}(97);Actinobacteria{phylum}(97);Actinobacteria{class}(97);Actinomycetales{order}(97);Nocardiaceae{family}(97);Nocardia{genus}(97);Unassigned{species}(0)	Bacteria	Actinobacteria	Actinobacteria	Actinomycetales	Nocardiaceae	Nocardia	Unassigned
ASV1356	9	0	7	93	24	20	0	0	17	59	8	0	0	0	0	237	Bacteria{superkingdom}(99);Proteobacteria{phylum}(99);Betaproteobacteria{class}(99);Burkholderiales{order}(99);Oxalobacteraceae{family}(99);Massilia{genus}(99);Unassigned{species}(0)	Bacteria	Proteobacteria	Betaproteobacteria	Burkholderiales	Oxalobacteraceae	Massilia	Unassigned
ASV1357	17	165	18	46	120	42	37	30	0	53	0	0	0	0	19	547	Bacteria{superkingdom}(92);Actinobacteria{phylum}(92);Actinobacteria{class}(92);Solirubrobacterales{order}(92);{family}(92);{genus}(92);Unassigned{species}(0)	Bacteria	Actinobacteria	Actinobacteria	Solirubrobacterales			Unassigned
ASV1358	0	0	0	0	0	0	0	35	0	22	0	0	11	0	0	68	Bacteria{superkingdom}(100);Acidobacteria{phylum}(100);Acidobacteria_Gp7{class}(100);{order}(100);{family}(100);Gp7{genus}(100);Unassigned{species}(0)	Bacteria	Acidobacteria	Acidobacteria_Gp7			Gp7	Unassigned
ASV1359	61	8	48	0	0	0	264	0	0	560	36	0	74	200	121	1372	Bacteria{superkingdom}(100);Actinobacteria{phylum}(100);Actinobacteria{class}(100);Solirubrobacterales{order}(100);Unassigned{family}(0);Unassigned{genus}(0);Unassigned{species}(0)	Bacteria	Actinobacteria	Actinobacteria	Solirubrobacterales	Unassigned	Unassigned	Unassigned
ASV1360	88	95	30	46	92	29	32	36	66	37	36	30	21	11	28	677	Bacteria{superkingdom}(92);Proteobacteria{phylum}(92);Gammaproteobacteria{class}(92);Chromatiales{order}(92);Unassigned{family}(0);Unassigned{genus}(0);Unassigned{species}(0)	Bacteria	Proteobacteria	Gammaproteobacteria	Chromatiales	Unassigned	Unassigned	Unassigned
ASV1362	33	66	0	117	204	26	0	19	34	50	24	35	72	27	34	741	Bacteria{superkingdom}(100);Proteobacteria{phylum}(100);Alphaproteobacteria{class}(100);{order}(100);{family}(100);{genus}(100);rhizosphere_soil_bacterium_RSC-II-82{species}(100)	Bacteria	Proteobacteria	Alphaproteobacteria				rhizosphere_soil_bacterium_RSC-II-82
ASV1363	0	0	0	0	0	0	0	0	0	59	0	0	0	0	26	85	Bacteria{superkingdom}(100);Acidobacteria{phylum}(100);Acidobacteria_Gp4{class}(100);{order}(100);{family}(100);Unassigned{genus}(0);Unassigned{species}(0)	Bacteria	Acidobacteria	Acidobacteria_Gp4			Unassigned	Unassigned
ASV1364	45	0	23	159	189	31	0	0	21	4	0	0	0	3	0	475	Bacteria{superkingdom}(100);Planctomycetes{phylum}(100);Planctomycetia{class}(100);Planctomycetales{order}(100);Planctomycetaceae{family}(100);{genus}(100);Unassigned{species}(0)	Bacteria	Planctomycetes	Planctomycetia	Planctomycetales	Planctomycetaceae		Unassigned
ASV1365	0	0	0	28	0	0	0	0	0	0	30	0	0	0	0	58	Bacteria{superkingdom}(100);Proteobacteria{phylum}(100);Deltaproteobacteria{class}(100);Myxococcales{order}(100);Polyangiaceae{family}(100);Unassigned{genus}(0);Unassigned{species}(0)	Bacteria	Proteobacteria	Deltaproteobacteria	Myxococcales	Polyangiaceae	Unassigned	Unassigned
ASV1368	9	359	63	0	61	23	51	1	0	3	0	0	0	0	10	580	Bacteria{superkingdom}(100);Acidobacteria{phylum}(100);Acidobacteria_Gp16{class}(100);{order}(100);{family}(100);Gp16{genus}(100);Unassigned{species}(0)	Bacteria	Acidobacteria	Acidobacteria_Gp16			Gp16	Unassigned
ASV1369	0	43	0	130	1400	25	57	0	0	0	0	0	0	0	12	1667	Bacteria{superkingdom}(100);Unassigned{phylum}(0);Unassigned{class}(0);Unassigned{order}(0);Unassigned{family}(0);Unassigned{genus}(0);Unassigned{species}(0)	Bacteria	Unassigned	Unassigned	Unassigned	Unassigned	Unassigned	Unassigned
ASV1370	26	0	0	0	0	0	0	0	0	0	0	0	0	0	0	26	Bacteria{superkingdom}(100);Proteobacteria{phylum}(100);Betaproteobacteria{class}(100);Burkholderiales{order}(100);Burkholderiaceae{family}(100);Cupriavidus{genus}(100);Unassigned{species}(0)	Bacteria	Proteobacteria	Betaproteobacteria	Burkholderiales	Burkholderiaceae	Cupriavidus	Unassigned
ASV1371	0	0	0	0	0	0	0	0	0	63	0	0	0	0	0	63	Bacteria{superkingdom}(100);Actinobacteria{phylum}(100);Actinobacteria{class}(100);Actinomycetales{order}(100);Nocardioidaceae{family}(100);{genus}(100);Unassigned{species}(0)	Bacteria	Actinobacteria	Actinobacteria	Actinomycetales	Nocardioidaceae		Unassigned
ASV1372	0	0	0	0	0	13	0	0	11	126	0	0	0	0	0	150	Bacteria{superkingdom}(84);Planctomycetes{phylum}(84);Planctomycetia{class}(84);Planctomycetales{order}(84);Planctomycetaceae{family}(84);{genus}(84);Unassigned{species}(0)	Bacteria	Planctomycetes	Planctomycetia	Planctomycetales	Planctomycetaceae		Unassigned
ASV1373	13	28	20	32	89	15	69	25	356	63	0	0	0	0	0	710	Bacteria{superkingdom}(84);Chloroflexi{phylum}(84);Anaerolineae{class}(84);Anaerolineales{order}(84);Anaerolineaceae{family}(84);{genus}(84);Unassigned{species}(0)	Bacteria	Chloroflexi	Anaerolineae	Anaerolineales	Anaerolineaceae		Unassigned
ASV1374	0	0	56	60	72	106	100	0	0	64	0	26	0	0	117	601	Bacteria{superkingdom}(100);Actinobacteria{phylum}(100);Unassigned{class}(0);Unassigned{order}(0);Unassigned{family}(0);Unassigned{genus}(0);Unassigned{species}(0)	Bacteria	Actinobacteria	Unassigned	Unassigned	Unassigned	Unassigned	Unassigned
ASV1375	18	66	15	66	75	0	0	19	17	59	0	0	0	6	0	341	Bacteria{superkingdom}(99);Proteobacteria{phylum}(99);Alphaproteobacteria{class}(99);Rhizobiales{order}(99);Phyllobacteriaceae{family}(99);Mesorhizobium{genus}(99);Unassigned{species}(0)	Bacteria	Proteobacteria	Alphaproteobacteria	Rhizobiales	Phyllobacteriaceae	Mesorhizobium	Unassigned
ASV1376	42	343	141	0	61	0	0	0	0	0	0	0	0	0	0	587	Bacteria{superkingdom}(92);{phylum}(92);{class}(92);{order}(92);{family}(92);{genus}(92);uncultured_Micromonospora_sp.{species}(92)	Bacteria						uncultured_Micromonospora_sp.
ASV1377	18	0	16	0	61	0	344	391	21	116	0	0	99	0	0	1066	Bacteria{superkingdom}(100);Bacteroidetes{phylum}(100);Sphingobacteriia{class}(100);Sphingobacteriales{order}(100);Chitinophagaceae{family}(100);Unassigned{genus}(0);Unassigned{species}(0)	Bacteria	Bacteroidetes	Sphingobacteriia	Sphingobacteriales	Chitinophagaceae	Unassigned	Unassigned
ASV1378	0	0	0	82	32	49	70	0	0	0	0	0	0	7	0	240	Bacteria{superkingdom}(100);Acidobacteria{phylum}(100);Acidobacteria_Gp6{class}(100);{order}(100);{family}(100);Gp6{genus}(100);Unassigned{species}(0)	Bacteria	Acidobacteria	Acidobacteria_Gp6			Gp6	Unassigned
ASV1379	0	0	0	0	0	0	0	0	0	164	0	26	0	0	0	190	Bacteria{superkingdom}(91);Proteobacteria{phylum}(91);Alphaproteobacteria{class}(91);Rhizobiales{order}(91);Hyphomicrobiaceae{family}(91);Devosia{genus}(91);Unassigned{species}(0)	Bacteria	Proteobacteria	Alphaproteobacteria	Rhizobiales	Hyphomicrobiaceae	Devosia	Unassigned
ASV1381	0	41	23	0	48	2	0	0	8	0	0	0	0	0	0	122	Bacteria{superkingdom}(100);Acidobacteria{phylum}(100);Acidobacteria_Gp6{class}(100);{order}(100);{family}(100);Gp6{genus}(100);Unassigned{species}(0)	Bacteria	Acidobacteria	Acidobacteria_Gp6			Gp6	Unassigned
ASV1382	0	87	0	0	0	0	0	47	0	0	0	0	0	0	0	134	Bacteria{superkingdom}(94);Actinobacteria{phylum}(94);{class}(94);{order}(94);{family}(94);{genus}(94);uncultured_Rubrobacteridae_bacterium{species}(94)	Bacteria	Actinobacteria					uncultured_Rubrobacteridae_bacterium
ASV1383	0	10	0	0	0	0	0	27	0	0	0	0	0	0	0	37	Bacteria{superkingdom}(82);Proteobacteria{phylum}(82);Alphaproteobacteria{class}(82);Rhizobiales{order}(82);Methylobacteriaceae{family}(82);{genus}(82);uncultured_bacterium{species}(82)	Bacteria	Proteobacteria	Alphaproteobacteria	Rhizobiales	Methylobacteriaceae		uncultured_bacterium
ASV1384	0	0	0	78	183	0	0	0	0	0	27	0	0	0	50	338	Bacteria{superkingdom}(100);Acidobacteria{phylum}(100);Acidobacteria_Gp6{class}(100);{order}(100);{family}(100);Gp6{genus}(100);Unassigned{species}(0)	Bacteria	Acidobacteria	Acidobacteria_Gp6			Gp6	Unassigned
ASV1386	222	0	0	0	0	0	0	0	0	0	0	0	40	0	0	262	Bacteria{superkingdom}(95);Firmicutes{phylum}(95);Bacilli{class}(95);Bacillales{order}(95);Bacillaceae_1{family}(95);Bacillus{genus}(95);Bacillus_funiculus{species}(95)	Bacteria	Firmicutes	Bacilli	Bacillales	Bacillaceae_1	Bacillus	Bacillus_funiculus
ASV1388	0	30	0	0	0	33	0	8	0	12	0	2	31	51	3	170	Bacteria{superkingdom}(100);Proteobacteria{phylum}(100);Alphaproteobacteria{class}(100);Alphaproteobacteria_incertae_sedis{order}(100);{family}(100);Geminicoccus{genus}(100);Unassigned{species}(0)	Bacteria	Proteobacteria	Alphaproteobacteria	Alphaproteobacteria_incertae_sedis		Geminicoccus	Unassigned
ASV1389	0	0	0	37	0	0	0	0	14	0	0	45	0	0	0	96	Bacteria{superkingdom}(99);Acidobacteria{phylum}(99);Acidobacteria_Gp4{class}(99);{order}(99);{family}(99);Gp4{genus}(99);Unassigned{species}(0)	Bacteria	Acidobacteria	Acidobacteria_Gp4			Gp4	Unassigned
ASV1390	0	0	0	0	0	0	13	16	0	15	0	0	0	5	0	49	Bacteria{superkingdom}(92);Chloroflexi{phylum}(92);Anaerolineae{class}(92);Anaerolineales{order}(92);Anaerolineaceae{family}(92);{genus}(92);Unassigned{species}(0)	Bacteria	Chloroflexi	Anaerolineae	Anaerolineales	Anaerolineaceae		Unassigned
ASV1392	0	71	26	86	0	58	0	0	63	103	69	48	247	0	57	828	Bacteria{superkingdom}(91);Proteobacteria{phylum}(91);Betaproteobacteria{class}(91);Burkholderiales{order}(91);Comamonadaceae{family}(91);Ramlibacter{genus}(91);Unassigned{species}(0)	Bacteria	Proteobacteria	Betaproteobacteria	Burkholderiales	Comamonadaceae	Ramlibacter	Unassigned
ASV1394	70	8	51	108	129	0	10	0	11	0	26	0	0	0	0	413	Bacteria{superkingdom}(82);Actinobacteria{phylum}(82);Actinobacteria{class}(82);Actinomycetales{order}(82);Microbacteriaceae{family}(82);Lysinimonas{genus}(82);uncultured_Microbacteriaceae_bacterium{species}(82)	Bacteria	Actinobacteria	Actinobacteria	Actinomycetales	Microbacteriaceae	Lysinimonas	uncultured_Microbacteriaceae_bacterium
ASV1396	16	21	0	25	0	0	0	36	32	0	0	10	15	0	13	168	Bacteria{superkingdom}(100);Chloroflexi{phylum}(100);Chloroflexia{class}(100);Kallotenuales{order}(100);Kallotenuaceae{family}(100);Kallotenue{genus}(100);Unassigned{species}(0)	Bacteria	Chloroflexi	Chloroflexia	Kallotenuales	Kallotenuaceae	Kallotenue	Unassigned
ASV1397	0	0	0	0	0	30	19	0	0	0	0	0	0	0	0	49	Bacteria{superkingdom}(100);Candidatus_Saccharibacteria{phylum}(100);{class}(100);{order}(100);{family}(100);Saccharibacteria_genera_incertae_sedis{genus}(100);Unassigned{species}(0)	Bacteria	Candidatus_Saccharibacteria				Saccharibacteria_genera_incertae_sedis	Unassigned
ASV1398	0	0	0	0	0	99	62	102	36	99	21	35	92	98	142	786	Bacteria{superkingdom}(91);Omnitrophica{phylum}(91);{class}(91);{order}(91);{family}(91);Omnitrophica_genera_incertae_sedis{genus}(91);uncultured_soil_bacterium{species}(91)	Bacteria	Omnitrophica				Omnitrophica_genera_incertae_sedis	uncultured_soil_bacterium
ASV1399	0	14	0	0	0	0	0	0	16	0	0	64	12	0	0	106	Bacteria{superkingdom}(84);Actinobacteria{phylum}(84);Actinobacteria{class}(84);Actinomycetales{order}(84);Propionibacteriaceae{family}(84);Microlunatus{genus}(84);actinobacterium_CPCC100076{species}(84)	Bacteria	Actinobacteria	Actinobacteria	Actinomycetales	Propionibacteriaceae	Microlunatus	actinobacterium_CPCC100076
ASV1400	22	0	0	35	0	0	19	69	16	174	0	19	0	116	0	470	Bacteria{superkingdom}(80);Chloroflexi{phylum}(80);Unassigned{class}(0);Unassigned{order}(0);Unassigned{family}(0);Unassigned{genus}(0);Unassigned{species}(0)	Bacteria	Chloroflexi	Unassigned	Unassigned	Unassigned	Unassigned	Unassigned
ASV1401	0	0	0	0	348	0	0	0	59	0	0	0	0	0	0	407	Bacteria{superkingdom}(80);Bacteroidetes{phylum}(80);Cytophagia{class}(80);Cytophagales{order}(80);{family}(80);Ohtaekwangia{genus}(80);uncultured_Sphingobacteriales_bacterium{species}(80)	Bacteria	Bacteroidetes	Cytophagia	Cytophagales		Ohtaekwangia	uncultured_Sphingobacteriales_bacterium
ASV1402	0	0	24	0	29	0	0	0	87	0	0	13	0	0	40	193	Bacteria{superkingdom}(99);Actinobacteria{phylum}(99);Actinobacteria{class}(99);Acidimicrobiales{order}(99);Acidimicrobineae_incertae_sedis{family}(99);Aciditerrimonas{genus}(99);Unassigned{species}(0)	Bacteria	Actinobacteria	Actinobacteria	Acidimicrobiales	Acidimicrobineae_incertae_sedis	Aciditerrimonas	Unassigned
ASV1403	0	0	0	1	48	0	0	21	0	0	0	4	0	0	0	74	Bacteria{superkingdom}(100);Verrucomicrobia{phylum}(100);Opitutae{class}(100);Opitutales{order}(100);Opitutaceae{family}(100);Opitutus{genus}(100);Unassigned{species}(0)	Bacteria	Verrucomicrobia	Opitutae	Opitutales	Opitutaceae	Opitutus	Unassigned
ASV1404	3	0	0	0	0	0	0	0	0	0	0	0	0	0	0	3	Bacteria{superkingdom}(100);Chloroflexi{phylum}(100);{class}(100);{order}(100);{family}(100);{genus}(100);uncultured_endolithic_bacterium{species}(100)	Bacteria	Chloroflexi					uncultured_endolithic_bacterium
ASV1405	0	0	59	151	375	0	0	0	0	0	8	0	0	0	0	593	Bacteria{superkingdom}(96);Candidatus_Saccharibacteria{phylum}(96);{class}(96);{order}(96);{family}(96);Saccharibacteria_genera_incertae_sedis{genus}(96);uncultured_candidate_division_TM7_bacterium{species}(96)	Bacteria	Candidatus_Saccharibacteria				Saccharibacteria_genera_incertae_sedis	uncultured_candidate_division_TM7_bacterium
ASV1406	0	0	0	0	0	0	0	0	0	145	0	179	14	20	0	358	Bacteria{superkingdom}(100);Actinobacteria{phylum}(100);Actinobacteria{class}(100);Actinomycetales{order}(100);Streptomycetaceae{family}(100);Streptomyces{genus}(100);Unassigned{species}(0)	Bacteria	Actinobacteria	Actinobacteria	Actinomycetales	Streptomycetaceae	Streptomyces	Unassigned
ASV1408	0	0	0	0	22	0	0	0	0	15	0	12	0	0	0	49	Bacteria{superkingdom}(94);Actinobacteria{phylum}(94);Actinobacteria{class}(94);Acidimicrobiales{order}(94);Acidimicrobineae_incertae_sedis{family}(94);Aciditerrimonas{genus}(94);Unassigned{species}(0)	Bacteria	Actinobacteria	Actinobacteria	Acidimicrobiales	Acidimicrobineae_incertae_sedis	Aciditerrimonas	Unassigned
ASV1409	34	0	60	0	554	0	0	38	0	183	0	0	60	0	44	973	Bacteria{superkingdom}(99);Proteobacteria{phylum}(99);Alphaproteobacteria{class}(99);Rhizobiales{order}(99);Rhizobiaceae{family}(99);Shinella{genus}(99);Unassigned{species}(0)	Bacteria	Proteobacteria	Alphaproteobacteria	Rhizobiales	Rhizobiaceae	Shinella	Unassigned
ASV1410	0	30	0	0	0	0	0	0	0	0	0	0	0	0	0	30	Bacteria{superkingdom}(90);Acidobacteria{phylum}(90);Acidobacteria_Gp4{class}(90);{order}(90);{family}(90);Gp4{genus}(90);uncultured_organism{species}(90)	Bacteria	Acidobacteria	Acidobacteria_Gp4			Gp4	uncultured_organism
ASV1413	0	0	0	0	0	0	0	22	0	35	0	0	18	0	0	75	Bacteria{superkingdom}(100);Proteobacteria{phylum}(100);Alphaproteobacteria{class}(100);Alphaproteobacteria_incertae_sedis{order}(100);{family}(100);Geminicoccus{genus}(100);Unassigned{species}(0)	Bacteria	Proteobacteria	Alphaproteobacteria	Alphaproteobacteria_incertae_sedis		Geminicoccus	Unassigned
ASV1414	0	0	0	0	0	0	0	0	0	0	0	79	68	78	0	225	Bacteria{superkingdom}(99);Acidobacteria{phylum}(99);Acidobacteria_Gp3{class}(99);{order}(99);{family}(99);Gp3{genus}(99);uncultured_Candidatus_Solibacter_sp.{species}(99)	Bacteria	Acidobacteria	Acidobacteria_Gp3			Gp3	uncultured_Candidatus_Solibacter_sp.
ASV1416	0	255	8	0	29	0	21	0	23	88	0	0	0	0	0	424	Bacteria{superkingdom}(88);Actinobacteria{phylum}(88);Actinobacteria{class}(88);Acidimicrobiales{order}(88);Acidimicrobineae_incertae_sedis{family}(88);Aciditerrimonas{genus}(88);Unassigned{species}(0)	Bacteria	Actinobacteria	Actinobacteria	Acidimicrobiales	Acidimicrobineae_incertae_sedis	Aciditerrimonas	Unassigned
ASV1417	0	0	44	117	67	32	22	0	55	138	169	289	41	154	72	1200	Bacteria{superkingdom}(89);Actinobacteria{phylum}(89);Actinobacteria{class}(89);Solirubrobacterales{order}(89);{family}(89);{genus}(89);Unassigned{species}(0)	Bacteria	Actinobacteria	Actinobacteria	Solirubrobacterales			Unassigned
ASV1418	31	0	0	8	100	0	0	0	8	0	0	0	0	0	0	147	Bacteria{superkingdom}(93);Verrucomicrobia{phylum}(93);Opitutae{class}(93);Opitutales{order}(93);Opitutaceae{family}(93);Opitutus{genus}(93);uncultured_Opitutaceae_bacterium{species}(93)	Bacteria	Verrucomicrobia	Opitutae	Opitutales	Opitutaceae	Opitutus	uncultured_Opitutaceae_bacterium
ASV1419	0	0	0	0	0	0	0	30	0	0	0	0	0	0	0	30	Bacteria{superkingdom}(100);Chloroflexi{phylum}(100);Caldilineae{class}(100);Caldilineales{order}(100);Caldilineaceae{family}(100);Litorilinea{genus}(100);Unassigned{species}(0)	Bacteria	Chloroflexi	Caldilineae	Caldilineales	Caldilineaceae	Litorilinea	Unassigned
ASV1420	0	0	0	0	0	0	0	0	0	68	0	30	0	0	0	98	Bacteria{superkingdom}(100);Proteobacteria{phylum}(100);Betaproteobacteria{class}(100);Burkholderiales{order}(100);Oxalobacteraceae{family}(100);Unassigned{genus}(0);Unassigned{species}(0)	Bacteria	Proteobacteria	Betaproteobacteria	Burkholderiales	Oxalobacteraceae	Unassigned	Unassigned
ASV1421	0	167	14	0	0	0	0	0	0	0	0	0	0	0	0	181	Bacteria{superkingdom}(94);Chloroflexi{phylum}(94);{class}(94);{order}(94);{family}(94);{genus}(94);Unassigned{species}(0)	Bacteria	Chloroflexi					Unassigned
ASV1422	0	0	25	0	48	0	6	0	0	13	0	0	0	0	0	92	Bacteria{superkingdom}(99);Chloroflexi{phylum}(99);Anaerolineae{class}(99);Anaerolineales{order}(99);Anaerolineaceae{family}(99);{genus}(99);Unassigned{species}(0)	Bacteria	Chloroflexi	Anaerolineae	Anaerolineales	Anaerolineaceae		Unassigned
ASV1423	16	0	47	48	0	21	0	22	0	46	0	0	0	0	0	200	Bacteria{superkingdom}(100);Chloroflexi{phylum}(100);Chloroflexia{class}(100);Kallotenuales{order}(100);Kallotenuaceae{family}(100);Kallotenue{genus}(100);uncultured_bacterium{species}(100)	Bacteria	Chloroflexi	Chloroflexia	Kallotenuales	Kallotenuaceae	Kallotenue	uncultured_bacterium
ASV1424	0	0	0	0	0	0	0	0	0	83	0	0	102	38	0	223	Bacteria{superkingdom}(100);Bacteroidetes{phylum}(100);Sphingobacteriia{class}(100);Sphingobacteriales{order}(100);Chitinophagaceae{family}(100);Segetibacter{genus}(100);Unassigned{species}(0)	Bacteria	Bacteroidetes	Sphingobacteriia	Sphingobacteriales	Chitinophagaceae	Segetibacter	Unassigned
ASV1425	116	0	15	51	0	0	15	7	0	0	0	0	0	0	0	204	Bacteria{superkingdom}(100);Proteobacteria{phylum}(100);Alphaproteobacteria{class}(100);{order}(100);{family}(100);{genus}(100);Unassigned{species}(0)	Bacteria	Proteobacteria	Alphaproteobacteria				Unassigned
ASV1427	24	0	16	55	504	58	100	16	24	71	0	0	0	0	13	881	Bacteria{superkingdom}(100);Bacteroidetes{phylum}(100);Sphingobacteriia{class}(100);Sphingobacteriales{order}(100);Chitinophagaceae{family}(100);Unassigned{genus}(0);Unassigned{species}(0)	Bacteria	Bacteroidetes	Sphingobacteriia	Sphingobacteriales	Chitinophagaceae	Unassigned	Unassigned
ASV1429	0	0	0	18	9	0	0	0	0	35	0	36	20	22	22	162	Bacteria{superkingdom}(99);Proteobacteria{phylum}(99);Alphaproteobacteria{class}(99);Rhodospirillales{order}(99);{family}(99);{genus}(99);Unassigned{species}(0)	Bacteria	Proteobacteria	Alphaproteobacteria	Rhodospirillales			Unassigned
ASV1430	0	5	2	69	0	0	0	0	0	0	0	0	0	0	0	76	Bacteria{superkingdom}(100);Proteobacteria{phylum}(100);Alphaproteobacteria{class}(100);Rhizobiales{order}(100);Bradyrhizobiaceae{family}(100);Bosea{genus}(100);Unassigned{species}(0)	Bacteria	Proteobacteria	Alphaproteobacteria	Rhizobiales	Bradyrhizobiaceae	Bosea	Unassigned
ASV1431	0	0	0	37	0	56	0	66	0	101	0	0	0	0	0	260	Bacteria{superkingdom}(100);Actinobacteria{phylum}(100);Unassigned{class}(0);Unassigned{order}(0);Unassigned{family}(0);Unassigned{genus}(0);Unassigned{species}(0)	Bacteria	Actinobacteria	Unassigned	Unassigned	Unassigned	Unassigned	Unassigned
ASV1432	19	34	20	0	112	52	67	30	12	126	15	14	0	22	15	538	Bacteria{superkingdom}(100);Proteobacteria{phylum}(100);Alphaproteobacteria{class}(100);Rhizobiales{order}(100);Hyphomicrobiaceae{family}(100);Pedomicrobium{genus}(100);Unassigned{species}(0)	Bacteria	Proteobacteria	Alphaproteobacteria	Rhizobiales	Hyphomicrobiaceae	Pedomicrobium	Unassigned
ASV1433	0	102	38	0	0	20	18	44	0	0	0	0	0	0	0	222	Bacteria{superkingdom}(91);Proteobacteria{phylum}(91);Gammaproteobacteria{class}(91);Chromatiales{order}(91);Unassigned{family}(0);Unassigned{genus}(0);Unassigned{species}(0)	Bacteria	Proteobacteria	Gammaproteobacteria	Chromatiales	Unassigned	Unassigned	Unassigned
ASV1434	0	0	17	59	0	0	0	0	10	0	0	0	769	0	0	855	Bacteria{superkingdom}(100);Actinobacteria{phylum}(100);Actinobacteria{class}(100);Actinomycetales{order}(100);Unassigned{family}(0);Unassigned{genus}(0);Unassigned{species}(0)	Bacteria	Actinobacteria	Actinobacteria	Actinomycetales	Unassigned	Unassigned	Unassigned
ASV1435	0	0	0	0	0	0	0	0	0	0	0	45	0	0	19	64	Bacteria{superkingdom}(82);Proteobacteria{phylum}(82);Alphaproteobacteria{class}(82);Rhodospirillales{order}(82);Acetobacteraceae{family}(82);Belnapia{genus}(82);Unassigned{species}(0)	Bacteria	Proteobacteria	Alphaproteobacteria	Rhodospirillales	Acetobacteraceae	Belnapia	Unassigned
ASV1436	0	0	0	1	0	0	0	0	8	0	0	13	0	0	0	22	Bacteria{superkingdom}(84);Actinobacteria{phylum}(84);Actinobacteria{class}(84);Solirubrobacterales{order}(84);Solirubrobacteraceae{family}(84);Solirubrobacter{genus}(84);uncultured_bacterium{species}(84)	Bacteria	Actinobacteria	Actinobacteria	Solirubrobacterales	Solirubrobacteraceae	Solirubrobacter	uncultured_bacterium
ASV1438	0	0	0	0	43	0	0	0	0	19	0	0	0	0	0	62	Bacteria{superkingdom}(100);Proteobacteria{phylum}(100);Alphaproteobacteria{class}(100);Rhizobiales{order}(100);{family}(100);{genus}(100);uncultured_endolithic_bacterium{species}(100)	Bacteria	Proteobacteria	Alphaproteobacteria	Rhizobiales			uncultured_endolithic_bacterium
ASV1439	41	0	24	73	163	16	0	16	0	0	0	35	0	0	8	376	Bacteria{superkingdom}(100);Armatimonadetes{phylum}(100);{class}(100);{order}(100);{family}(100);Armatimonadetes_gp5{genus}(100);Unassigned{species}(0)	Bacteria	Armatimonadetes				Armatimonadetes_gp5	Unassigned
ASV1440	276	126	103	357	2047	0	0	0	0	0	0	0	0	0	54	2963	Bacteria{superkingdom}(100);Verrucomicrobia{phylum}(100);Opitutae{class}(100);Opitutales{order}(100);Opitutaceae{family}(100);Opitutus{genus}(100);Unassigned{species}(0)	Bacteria	Verrucomicrobia	Opitutae	Opitutales	Opitutaceae	Opitutus	Unassigned
ASV1441	41	0	135	0	78	0	48	78	32	0	0	0	0	0	0	412	Bacteria{superkingdom}(100);Actinobacteria{phylum}(100);Actinobacteria{class}(100);Gaiellales{order}(100);Gaiellaceae{family}(100);Gaiella{genus}(100);Unassigned{species}(0)	Bacteria	Actinobacteria	Actinobacteria	Gaiellales	Gaiellaceae	Gaiella	Unassigned
ASV1442	28	0	19	99	131	0	0	0	0	35	0	35	0	0	0	347	Bacteria{superkingdom}(88);Proteobacteria{phylum}(88);Alphaproteobacteria{class}(88);Rhizobiales{order}(88);Hyphomicrobiaceae{family}(88);Blastochloris{genus}(88);uncultured_alpha_proteobacterium{species}(88)	Bacteria	Proteobacteria	Alphaproteobacteria	Rhizobiales	Hyphomicrobiaceae	Blastochloris	uncultured_alpha_proteobacterium
ASV1443	0	0	15	71	0	37	13	23	41	38	120	32	72	69	41	572	Bacteria{superkingdom}(100);Acidobacteria{phylum}(100);Acidobacteria_Gp6{class}(100);{order}(100);{family}(100);Gp6{genus}(100);Unassigned{species}(0)	Bacteria	Acidobacteria	Acidobacteria_Gp6			Gp6	Unassigned
ASV1444	0	8	0	0	0	0	0	0	0	0	0	0	0	0	0	8	Bacteria{superkingdom}(92);Armatimonadetes{phylum}(92);{class}(92);{order}(92);{family}(92);Armatimonadetes_gp4{genus}(92);uncultured_bacterium{species}(92)	Bacteria	Armatimonadetes				Armatimonadetes_gp4	uncultured_bacterium
ASV1445	0	0	0	0	0	0	0	0	0	0	0	18	0	0	0	18	Bacteria{superkingdom}(97);Proteobacteria{phylum}(97);Alphaproteobacteria{class}(97);Rhizobiales{order}(97);Phyllobacteriaceae{family}(97);{genus}(97);Unassigned{species}(0)	Bacteria	Proteobacteria	Alphaproteobacteria	Rhizobiales	Phyllobacteriaceae		Unassigned
ASV1446	82	0	34	0	0	0	0	0	0	0	0	0	0	0	0	116	Bacteria{superkingdom}(100);Actinobacteria{phylum}(100);Actinobacteria{class}(100);Gaiellales{order}(100);Gaiellaceae{family}(100);Gaiella{genus}(100);Unassigned{species}(0)	Bacteria	Actinobacteria	Actinobacteria	Gaiellales	Gaiellaceae	Gaiella	Unassigned
ASV1447	34	0	32	273	0	0	0	0	28	0	0	0	0	0	47	414	Bacteria{superkingdom}(84);Bacteroidetes{phylum}(84);Sphingobacteriia{class}(84);Sphingobacteriales{order}(84);Chitinophagaceae{family}(84);Niastella{genus}(84);uncultured_bacterium{species}(84)	Bacteria	Bacteroidetes	Sphingobacteriia	Sphingobacteriales	Chitinophagaceae	Niastella	uncultured_bacterium
ASV1448	56	0	0	0	0	0	0	0	0	0	0	0	0	0	0	56	Bacteria{superkingdom}(100);Proteobacteria{phylum}(100);Alphaproteobacteria{class}(100);Rhizobiales{order}(100);Rhodobiaceae{family}(100);Unassigned{genus}(0);Unassigned{species}(0)	Bacteria	Proteobacteria	Alphaproteobacteria	Rhizobiales	Rhodobiaceae	Unassigned	Unassigned
ASV1449	0	0	0	0	0	0	0	0	0	18	0	38	24	15	0	95	Bacteria{superkingdom}(99);Armatimonadetes{phylum}(99);{class}(99);{order}(99);{family}(99);Armatimonadetes_gp4{genus}(99);uncultured_Firmicutes_bacterium{species}(99)	Bacteria	Armatimonadetes				Armatimonadetes_gp4	uncultured_Firmicutes_bacterium
ASV1453	0	0	0	0	0	0	0	0	0	18	0	33	0	32	0	83	Bacteria{superkingdom}(100);Actinobacteria{phylum}(100);Actinobacteria{class}(100);Actinomycetales{order}(100);Nocardioidaceae{family}(100);Nocardioides{genus}(100);Unassigned{species}(0)	Bacteria	Actinobacteria	Actinobacteria	Actinomycetales	Nocardioidaceae	Nocardioides	Unassigned
ASV1454	21	0	44	25	332	15	0	37	0	0	237	17	0	0	143	871	Bacteria{superkingdom}(92);Ignavibacteriae{phylum}(92);Ignavibacteria{class}(92);Ignavibacteriales{order}(92);Ignavibacteriaceae{family}(92);{genus}(92);uncultured_soil_bacterium{species}(92)	Bacteria	Ignavibacteriae	Ignavibacteria	Ignavibacteriales	Ignavibacteriaceae		uncultured_soil_bacterium
[truncated: 16,797 more rows]
