# Supplementary material for: Years of sand fixation with Caragana korshinskii drive the enrichment of its rhizosphere functional microbes by accumulating soil N
Source: PeerJ journal article supplement (doi:10.7717/peerj.14271), 2022-11-01
Supplement: ASV_of_bacteria_in_fall.xlsx [file ASV_of_bacteria_in_fall.xlsx]

## Sheet: OTU
#ASV ID	Ck18-1	Ck18-2	Ck18-3	Ck18-4	Ck18-5	Ck18-6	Ck12-1	Ck12-2	Ck12-3	Ck12-4	Ck12-5	Ck12-6	Ck6-1	Ck6-2	Ck6-3	Ck6-4	Ck6-5	ASVsize	Taxonomy	superkingdom	phylum	class	order	family	genus	species
ASV1	942	702	1056	968	606	913	5098	2975	3150	3157	3144	3323	4697	6870	3523	3274	2956	47354	Bacteria{superkingdom}(99);Proteobacteria{phylum}(99);Gammaproteobacteria{class}(99);Pseudomonadales{order}(99);Pseudomonadaceae{family}(99);Pseudomonas{genus}(99);Unassigned{species}(0)	Bacteria	Proteobacteria	Gammaproteobacteria	Pseudomonadales	Pseudomonadaceae	Pseudomonas	Unassigned
ASV2	1472	811	1361	3731	859	1255	505	424	357	248	227	256	1060	1626	30	1549	3892	19663	Bacteria{superkingdom}(100);Actinobacteria{phylum}(100);Actinobacteria{class}(100);Actinomycetales{order}(100);Streptomycetaceae{family}(100);Streptomyces{genus}(100);Unassigned{species}(0)	Bacteria	Actinobacteria	Actinobacteria	Actinomycetales	Streptomycetaceae	Streptomyces	Unassigned
ASV3	2513	610	2738	2089	1141	1117	2335	940	1651	2790	1473	4038	4307	1877	3631	3717	2380	39347	Bacteria{superkingdom}(97);Actinobacteria{phylum}(97);Actinobacteria{class}(97);Actinomycetales{order}(97);Micrococcaceae{family}(97);Arthrobacter{genus}(97);Unassigned{species}(0)	Bacteria	Actinobacteria	Actinobacteria	Actinomycetales	Micrococcaceae	Arthrobacter	Unassigned
ASV6	1150	433	1012	2496	970	2244	398	26	133	211	294	71	173	426	126	1183	87	11433	Bacteria{superkingdom}(100);Actinobacteria{phylum}(100);Actinobacteria{class}(100);Actinomycetales{order}(100);Nocardioidaceae{family}(100);Kribbella{genus}(100);Unassigned{species}(0)	Bacteria	Actinobacteria	Actinobacteria	Actinomycetales	Nocardioidaceae	Kribbella	Unassigned
ASV7	659	455	933	791	433	687	2049	1133	1050	1315	1218	1133	2020	2435	1180	1095	1090	19676	Bacteria{superkingdom}(98);Proteobacteria{phylum}(98);Alphaproteobacteria{class}(98);Rhizobiales{order}(98);Brucellaceae{family}(98);Ochrobactrum{genus}(98);Unassigned{species}(0)	Bacteria	Proteobacteria	Alphaproteobacteria	Rhizobiales	Brucellaceae	Ochrobactrum	Unassigned
ASV8	1769	353	966	1449	1143	235	884	1481	1217	3344	964	3075	131	730	577	2255	2018	22591	Bacteria{superkingdom}(97);Actinobacteria{phylum}(97);Actinobacteria{class}(97);Actinomycetales{order}(97);Micrococcaceae{family}(97);Arthrobacter{genus}(97);Unassigned{species}(0)	Bacteria	Actinobacteria	Actinobacteria	Actinomycetales	Micrococcaceae	Arthrobacter	Unassigned
ASV9	1810	319	1591	3861	2402	1083	0	46	152	156	0	105	0	0	0	0	0	11525	Bacteria{superkingdom}(99);Actinobacteria{phylum}(99);Actinobacteria{class}(99);Actinomycetales{order}(99);Streptomycetaceae{family}(99);Streptomyces{genus}(99);Unassigned{species}(0)	Bacteria	Actinobacteria	Actinobacteria	Actinomycetales	Streptomycetaceae	Streptomyces	Unassigned
ASV10	368	199	204	1684	316	817	267	54	273	185	110	351	274	146	639	256	287	6430	Bacteria{superkingdom}(83);Actinobacteria{phylum}(83);Actinobacteria{class}(83);Actinomycetales{order}(83);Pseudonocardiaceae{family}(83);Lechevalieria{genus}(83);Unassigned{species}(0)	Bacteria	Actinobacteria	Actinobacteria	Actinomycetales	Pseudonocardiaceae	Lechevalieria	Unassigned
ASV11	0	0	0	32	24	33	0	0	0	0	0	0	0	0	0	0	0	89	Bacteria{superkingdom}(99);Actinobacteria{phylum}(99);Actinobacteria{class}(99);Actinomycetales{order}(99);Streptomycetaceae{family}(99);Streptomyces{genus}(99);Unassigned{species}(0)	Bacteria	Actinobacteria	Actinobacteria	Actinomycetales	Streptomycetaceae	Streptomyces	Unassigned
ASV12	275	197	256	291	290	959	402	0	19	161	67	0	210	13	0	23	53	3216	Bacteria{superkingdom}(100);Acidobacteria{phylum}(100);Acidobacteria_Gp4{class}(100);{order}(100);{family}(100);Gp4{genus}(100);Unassigned{species}(0)	Bacteria	Acidobacteria	Acidobacteria_Gp4			Gp4	Unassigned
ASV13	1084	1209	1802	696	1052	768	798	861	1198	671	885	583	456	606	1613	142	530	14954	Bacteria{superkingdom}(88);Chloroflexi{phylum}(88);Anaerolineae{class}(88);Anaerolineales{order}(88);Anaerolineaceae{family}(88);{genus}(88);uncultured_soil_bacterium{species}(88)	Bacteria	Chloroflexi	Anaerolineae	Anaerolineales	Anaerolineaceae		uncultured_soil_bacterium
ASV14	961	30	803	1374	564	588	64	242	367	890	192	843	341	631	1398	1447	631	11366	Bacteria{superkingdom}(100);Actinobacteria{phylum}(100);Actinobacteria{class}(100);Actinomycetales{order}(100);Microbacteriaceae{family}(100);Agromyces{genus}(100);Unassigned{species}(0)	Bacteria	Actinobacteria	Actinobacteria	Actinomycetales	Microbacteriaceae	Agromyces	Unassigned
ASV15	1139	0	572	1371	917	1498	76	0	69	119	113	0	130	165	777	102	39	7087	Bacteria{superkingdom}(100);Actinobacteria{phylum}(100);Actinobacteria{class}(100);Actinomycetales{order}(100);Pseudonocardiaceae{family}(100);Amycolatopsis{genus}(100);Unassigned{species}(0)	Bacteria	Actinobacteria	Actinobacteria	Actinomycetales	Pseudonocardiaceae	Amycolatopsis	Unassigned
ASV16	815	167	986	304	952	636	137	41	122	19	33	0	114	0	0	33	120	4479	Bacteria{superkingdom}(99);Proteobacteria{phylum}(99);Alphaproteobacteria{class}(99);Rhizobiales{order}(99);Rhizobiaceae{family}(99);Rhizobium{genus}(99);Unassigned{species}(0)	Bacteria	Proteobacteria	Alphaproteobacteria	Rhizobiales	Rhizobiaceae	Rhizobium	Unassigned
ASV17	353	1026	1326	471	828	2053	942	94	222	0	130	29	1537	37	61	38	84	9231	Bacteria{superkingdom}(100);Proteobacteria{phylum}(100);Alphaproteobacteria{class}(100);Rhizobiales{order}(100);Phyllobacteriaceae{family}(100);Mesorhizobium{genus}(100);Unassigned{species}(0)	Bacteria	Proteobacteria	Alphaproteobacteria	Rhizobiales	Phyllobacteriaceae	Mesorhizobium	Unassigned
ASV18	350	0	205	1371	324	713	0	0	0	17	0	0	0	12	0	0	0	2992	Bacteria{superkingdom}(100);Proteobacteria{phylum}(100);Gammaproteobacteria{class}(100);Xanthomonadales{order}(100);Xanthomonadaceae{family}(100);Pseudoxanthomonas{genus}(100);Unassigned{species}(0)	Bacteria	Proteobacteria	Gammaproteobacteria	Xanthomonadales	Xanthomonadaceae	Pseudoxanthomonas	Unassigned
ASV19	646	168	454	703	592	895	216	112	189	154	66	176	589	197	86	641	322	6206	Bacteria{superkingdom}(97);Actinobacteria{phylum}(97);Actinobacteria{class}(97);Actinomycetales{order}(97);Mycobacteriaceae{family}(97);Mycobacterium{genus}(97);Unassigned{species}(0)	Bacteria	Actinobacteria	Actinobacteria	Actinomycetales	Mycobacteriaceae	Mycobacterium	Unassigned
ASV20	704	110	1151	1346	1044	745	245	85	199	213	93	111	157	282	471	183	417	7556	Bacteria{superkingdom}(100);Actinobacteria{phylum}(100);Actinobacteria{class}(100);Actinomycetales{order}(100);Microbacteriaceae{family}(100);Microbacterium{genus}(100);Unassigned{species}(0)	Bacteria	Actinobacteria	Actinobacteria	Actinomycetales	Microbacteriaceae	Microbacterium	Unassigned
ASV21	596	410	260	752	146	488	172	377	263	934	189	793	295	2079	1038	2973	302	12067	Bacteria{superkingdom}(99);Actinobacteria{phylum}(99);Actinobacteria{class}(99);Actinomycetales{order}(99);Nocardioidaceae{family}(99);Aeromicrobium{genus}(99);Unassigned{species}(0)	Bacteria	Actinobacteria	Actinobacteria	Actinomycetales	Nocardioidaceae	Aeromicrobium	Unassigned
ASV22	461	94	360	406	479	331	550	796	353	556	504	691	1226	859	1188	364	952	10170	Bacteria{superkingdom}(99);Proteobacteria{phylum}(99);Alphaproteobacteria{class}(99);Rhizobiales{order}(99);Hyphomicrobiaceae{family}(99);Hyphomicrobium{genus}(99);Unassigned{species}(0)	Bacteria	Proteobacteria	Alphaproteobacteria	Rhizobiales	Hyphomicrobiaceae	Hyphomicrobium	Unassigned
ASV23	184	0	192	497	496	994	117	0	45	0	0	0	234	0	0	0	46	2805	Bacteria{superkingdom}(99);Proteobacteria{phylum}(99);Alphaproteobacteria{class}(99);Rhodospirillales{order}(99);Rhodospirillaceae{family}(99);Dongia{genus}(99);Unassigned{species}(0)	Bacteria	Proteobacteria	Alphaproteobacteria	Rhodospirillales	Rhodospirillaceae	Dongia	Unassigned
ASV24	1990	85	1838	0	3803	237	1202	220	0	251	26	0	0	0	0	0	0	9652	Bacteria{superkingdom}(100);Actinobacteria{phylum}(100);Actinobacteria{class}(100);Actinomycetales{order}(100);Streptomycetaceae{family}(100);Streptomyces{genus}(100);Unassigned{species}(0)	Bacteria	Actinobacteria	Actinobacteria	Actinomycetales	Streptomycetaceae	Streptomyces	Unassigned
ASV25	579	430	390	271	352	552	586	644	577	691	289	227	1832	181	367	221	497	8686	Bacteria{superkingdom}(97);Actinobacteria{phylum}(97);Actinobacteria{class}(97);Acidimicrobiales{order}(97);Acidimicrobineae_incertae_sedis{family}(97);Aciditerrimonas{genus}(97);uncultured_Acidimicrobiales_bacterium{species}(97)	Bacteria	Actinobacteria	Actinobacteria	Acidimicrobiales	Acidimicrobineae_incertae_sedis	Aciditerrimonas	uncultured_Acidimicrobiales_bacterium
ASV26	518	81	1151	213	307	599	1147	2301	1578	358	344	1827	964	17	75	80	2089	13649	Bacteria{superkingdom}(100);{phylum}(100);{class}(100);{order}(100);{family}(100);{genus}(100);uncultured_Actinomyces_sp.{species}(100)	Bacteria						uncultured_Actinomyces_sp.
ASV27	277	47	293	328	385	107	343	142	162	163	165	461	232	262	715	253	144	4479	Bacteria{superkingdom}(100);Actinobacteria{phylum}(100);Actinobacteria{class}(100);Actinomycetales{order}(100);Streptomycetaceae{family}(100);Streptomyces{genus}(100);Unassigned{species}(0)	Bacteria	Actinobacteria	Actinobacteria	Actinomycetales	Streptomycetaceae	Streptomyces	Unassigned
ASV28	517	88	379	603	907	734	93	102	126	102	25	0	99	0	87	0	183	4045	Bacteria{superkingdom}(99);Proteobacteria{phylum}(99);Alphaproteobacteria{class}(99);Rhizobiales{order}(99);{family}(99);{genus}(99);Unassigned{species}(0)	Bacteria	Proteobacteria	Alphaproteobacteria	Rhizobiales			Unassigned
ASV30	0	0	49	0	1257	1331	0	0	0	17	0	0	0	0	0	0	58	2712	Bacteria{superkingdom}(100);Bacteroidetes{phylum}(100);Sphingobacteriia{class}(100);Sphingobacteriales{order}(100);Chitinophagaceae{family}(100);Chitinophaga{genus}(100);Unassigned{species}(0)	Bacteria	Bacteroidetes	Sphingobacteriia	Sphingobacteriales	Chitinophagaceae	Chitinophaga	Unassigned
ASV31	465	48	480	841	408	509	50	53	47	60	39	168	122	111	118	78	128	3725	Bacteria{superkingdom}(100);Proteobacteria{phylum}(100);Alphaproteobacteria{class}(100);Rhizobiales{order}(100);Rhizobiaceae{family}(100);Ensifer{genus}(100);Unassigned{species}(0)	Bacteria	Proteobacteria	Alphaproteobacteria	Rhizobiales	Rhizobiaceae	Ensifer	Unassigned
ASV32	570	296	224	360	190	260	196	676	308	781	114	685	191	363	0	198	410	5822	Bacteria{superkingdom}(97);Proteobacteria{phylum}(97);Alphaproteobacteria{class}(97);Rhizobiales{order}(97);Rhodobiaceae{family}(97);{genus}(97);Unassigned{species}(0)	Bacteria	Proteobacteria	Alphaproteobacteria	Rhizobiales	Rhodobiaceae		Unassigned
ASV33	24	226	0	0	0	0	25	209	94	252	27	249	0	0	0	0	0	1106	Bacteria{superkingdom}(100);Acidobacteria{phylum}(100);Acidobacteria_Gp4{class}(100);{order}(100);{family}(100);Gp4{genus}(100);Unassigned{species}(0)	Bacteria	Acidobacteria	Acidobacteria_Gp4			Gp4	Unassigned
ASV34	248	1136	47	258	101	37	0	336	216	482	55	425	25	116	51	1051	80	4664	Bacteria{superkingdom}(99);Chloroflexi{phylum}(99);Anaerolineae{class}(99);Anaerolineales{order}(99);Anaerolineaceae{family}(99);{genus}(99);uncultured_soil_bacterium{species}(99)	Bacteria	Chloroflexi	Anaerolineae	Anaerolineales	Anaerolineaceae		uncultured_soil_bacterium
ASV35	18	67	39	0	103	48	22	40	149	35	55	51	101	20	37	162	137	1084	Bacteria{superkingdom}(100);Actinobacteria{phylum}(100);Actinobacteria{class}(100);Actinomycetales{order}(100);Pseudonocardiaceae{family}(100);Lentzea{genus}(100);Unassigned{species}(0)	Bacteria	Actinobacteria	Actinobacteria	Actinomycetales	Pseudonocardiaceae	Lentzea	Unassigned
ASV36	207	855	117	24	129	249	0	0	23	67	0	0	0	0	0	69	0	1740	Bacteria{superkingdom}(85);Acidobacteria{phylum}(85);Acidobacteria_Gp4{class}(85);{order}(85);{family}(85);Gp4{genus}(85);uncultured_Rhodopseudomonas_sp.{species}(85)	Bacteria	Acidobacteria	Acidobacteria_Gp4			Gp4	uncultured_Rhodopseudomonas_sp.
ASV37	351	90	856	437	1741	485	50	62	194	192	0	43	148	84	69	152	148	5102	Bacteria{superkingdom}(100);Proteobacteria{phylum}(100);Alphaproteobacteria{class}(100);Sphingomonadales{order}(100);Sphingomonadaceae{family}(100);Sphingomonas{genus}(100);Unassigned{species}(0)	Bacteria	Proteobacteria	Alphaproteobacteria	Sphingomonadales	Sphingomonadaceae	Sphingomonas	Unassigned
ASV38	47	688	39	0	29	0	939	827	409	426	19	559	0	33	27	1015	52	5109	Bacteria{superkingdom}(100);Acidobacteria{phylum}(100);Acidobacteria_Gp4{class}(100);{order}(100);{family}(100);Gp4{genus}(100);uncultured_Candidatus_Chloracidobacterium_sp.{species}(100)	Bacteria	Acidobacteria	Acidobacteria_Gp4			Gp4	uncultured_Candidatus_Chloracidobacterium_sp.
ASV39	154	94	170	861	376	458	112	190	295	996	91	320	211	419	695	490	0	5932	Bacteria{superkingdom}(100);Nitrospirae{phylum}(100);Nitrospira{class}(100);Nitrospirales{order}(100);Nitrospiraceae{family}(100);Nitrospira{genus}(100);Unassigned{species}(0)	Bacteria	Nitrospirae	Nitrospira	Nitrospirales	Nitrospiraceae	Nitrospira	Unassigned
ASV40	699	47	1363	907	163	1540	192	0	175	85	0	114	0	0	0	0	0	5285	Bacteria{superkingdom}(91);Actinobacteria{phylum}(91);Actinobacteria{class}(91);Actinomycetales{order}(91);Pseudonocardiaceae{family}(91);Actinophytocola{genus}(91);uncultured_bacterium{species}(91)	Bacteria	Actinobacteria	Actinobacteria	Actinomycetales	Pseudonocardiaceae	Actinophytocola	uncultured_bacterium
ASV41	376	116	248	485	588	666	198	102	140	179	73	122	122	94	130	141	146	3926	Bacteria{superkingdom}(100);Acidobacteria{phylum}(100);Acidobacteria_Gp6{class}(100);{order}(100);{family}(100);Gp6{genus}(100);Unassigned{species}(0)	Bacteria	Acidobacteria	Acidobacteria_Gp6			Gp6	Unassigned
ASV42	831	0	95	1661	162	685	19	0	0	122	392	117	0	0	0	0	0	4084	Bacteria{superkingdom}(99);Actinobacteria{phylum}(99);Actinobacteria{class}(99);Actinomycetales{order}(99);Streptomycetaceae{family}(99);Streptomyces{genus}(99);Unassigned{species}(0)	Bacteria	Actinobacteria	Actinobacteria	Actinomycetales	Streptomycetaceae	Streptomyces	Unassigned
ASV43	1105	160	696	266	1262	626	361	108	423	388	231	124	206	75	424	53	246	6754	Bacteria{superkingdom}(100);Proteobacteria{phylum}(100);Gammaproteobacteria{class}(100);Xanthomonadales{order}(100);Sinobacteraceae{family}(100);Steroidobacter{genus}(100);Unassigned{species}(0)	Bacteria	Proteobacteria	Gammaproteobacteria	Xanthomonadales	Sinobacteraceae	Steroidobacter	Unassigned
ASV44	136	292	376	220	205	273	472	616	574	660	216	624	508	763	1249	730	955	8869	Bacteria{superkingdom}(100);Acidobacteria{phylum}(100);Acidobacteria_Gp16{class}(100);{order}(100);{family}(100);Gp16{genus}(100);Unassigned{species}(0)	Bacteria	Acidobacteria	Acidobacteria_Gp16			Gp16	Unassigned
ASV45	322	240	193	278	357	398	69	50	94	55	37	104	214	135	89	130	154	2919	Bacteria{superkingdom}(94);Proteobacteria{phylum}(94);Alphaproteobacteria{class}(94);Rhizobiales{order}(94);Bradyrhizobiaceae{family}(94);Bradyrhizobium{genus}(94);Unassigned{species}(0)	Bacteria	Proteobacteria	Alphaproteobacteria	Rhizobiales	Bradyrhizobiaceae	Bradyrhizobium	Unassigned
ASV46	171	107	114	252	176	495	0	28	0	56	0	0	0	58	0	91	0	1548	Bacteria{superkingdom}(91);Proteobacteria{phylum}(91);Gammaproteobacteria{class}(91);Xanthomonadales{order}(91);Sinobacteraceae{family}(91);Steroidobacter{genus}(91);Unassigned{species}(0)	Bacteria	Proteobacteria	Gammaproteobacteria	Xanthomonadales	Sinobacteraceae	Steroidobacter	Unassigned
ASV47	385	0	200	121	487	400	0	0	0	0	99	27	984	0	0	0	16	2719	Bacteria{superkingdom}(98);Acidobacteria{phylum}(98);Acidobacteria_Gp7{class}(98);{order}(98);{family}(98);Gp7{genus}(98);uncultured_Anaeromyxobacter_sp.{species}(98)	Bacteria	Acidobacteria	Acidobacteria_Gp7			Gp7	uncultured_Anaeromyxobacter_sp.
ASV48	544	712	457	167	446	291	248	466	357	144	69	172	13	6	0	72	91	4255	Bacteria{superkingdom}(84);Nitrospirae{phylum}(84);Nitrospira{class}(84);Nitrospirales{order}(84);Nitrospiraceae{family}(84);Nitrospira{genus}(84);uncultured_soil_bacterium{species}(84)	Bacteria	Nitrospirae	Nitrospira	Nitrospirales	Nitrospiraceae	Nitrospira	uncultured_soil_bacterium
ASV49	567	0	585	499	782	154	77	0	40	27	10	0	23	42	42	36	64	2948	Bacteria{superkingdom}(100);Proteobacteria{phylum}(100);Betaproteobacteria{class}(100);Methylophilales{order}(100);Methylophilaceae{family}(100);Unassigned{genus}(0);Unassigned{species}(0)	Bacteria	Proteobacteria	Betaproteobacteria	Methylophilales	Methylophilaceae	Unassigned	Unassigned
ASV50	155	51	241	78	232	881	230	52	103	650	135	75	2193	252	0	30	123	5481	Bacteria{superkingdom}(98);Nitrospirae{phylum}(98);Nitrospira{class}(98);Nitrospirales{order}(98);Nitrospiraceae{family}(98);Nitrospira{genus}(98);uncultured_organism{species}(98)	Bacteria	Nitrospirae	Nitrospira	Nitrospirales	Nitrospiraceae	Nitrospira	uncultured_organism
ASV52	385	73	324	383	155	771	21	31	16	92	19	106	271	1275	222	1229	269	5642	Bacteria{superkingdom}(100);Actinobacteria{phylum}(100);Actinobacteria{class}(100);Actinomycetales{order}(100);Nocardioidaceae{family}(100);Nocardioides{genus}(100);Unassigned{species}(0)	Bacteria	Actinobacteria	Actinobacteria	Actinomycetales	Nocardioidaceae	Nocardioides	Unassigned
ASV53	108	166	21	80	60	35	19	17	18	187	45	224	35	476	967	255	1785	4498	Bacteria{superkingdom}(100);Acidobacteria{phylum}(100);Acidobacteria_Gp4{class}(100);{order}(100);{family}(100);Gp4{genus}(100);Unassigned{species}(0)	Bacteria	Acidobacteria	Acidobacteria_Gp4			Gp4	Unassigned
ASV54	574	99	382	515	860	339	73	0	90	0	53	106	120	22	0	23	62	3318	Bacteria{superkingdom}(89);Proteobacteria{phylum}(89);Betaproteobacteria{class}(89);Burkholderiales{order}(89);Comamonadaceae{family}(89);Variovorax{genus}(89);Unassigned{species}(0)	Bacteria	Proteobacteria	Betaproteobacteria	Burkholderiales	Comamonadaceae	Variovorax	Unassigned
ASV55	409	178	133	389	66	245	44	320	304	292	53	287	189	927	485	1138	218	5677	Bacteria{superkingdom}(100);Actinobacteria{phylum}(100);Actinobacteria{class}(100);Actinomycetales{order}(100);Nocardioidaceae{family}(100);Nocardioides{genus}(100);Unassigned{species}(0)	Bacteria	Actinobacteria	Actinobacteria	Actinomycetales	Nocardioidaceae	Nocardioides	Unassigned
ASV56	0	0	0	350	0	36	0	0	0	97	0	0	0	0	0	0	0	483	Bacteria{superkingdom}(100);Actinobacteria{phylum}(100);Actinobacteria{class}(100);Actinomycetales{order}(100);Streptomycetaceae{family}(100);Streptomyces{genus}(100);Unassigned{species}(0)	Bacteria	Actinobacteria	Actinobacteria	Actinomycetales	Streptomycetaceae	Streptomyces	Unassigned
ASV57	288	220	579	312	115	243	1085	461	526	823	188	228	439	72	386	189	263	6417	Bacteria{superkingdom}(99);Actinobacteria{phylum}(99);Actinobacteria{class}(99);Acidimicrobiales{order}(99);Acidimicrobineae_incertae_sedis{family}(99);Aciditerrimonas{genus}(99);uncultured_Acidimicrobiales_bacterium{species}(99)	Bacteria	Actinobacteria	Actinobacteria	Acidimicrobiales	Acidimicrobineae_incertae_sedis	Aciditerrimonas	uncultured_Acidimicrobiales_bacterium
ASV58	509	92	146	389	329	342	97	284	100	101	53	88	369	461	248	86	435	4129	Bacteria{superkingdom}(100);Proteobacteria{phylum}(100);Alphaproteobacteria{class}(100);Rhizobiales{order}(100);Unassigned{family}(0);Unassigned{genus}(0);Unassigned{species}(0)	Bacteria	Proteobacteria	Alphaproteobacteria	Rhizobiales	Unassigned	Unassigned	Unassigned
ASV60	491	362	705	1017	704	730	170	62	0	143	120	63	235	90	70	0	22	4984	Bacteria{superkingdom}(100);Proteobacteria{phylum}(100);Gammaproteobacteria{class}(100);Xanthomonadales{order}(100);Sinobacteraceae{family}(100);Steroidobacter{genus}(100);Unassigned{species}(0)	Bacteria	Proteobacteria	Gammaproteobacteria	Xanthomonadales	Sinobacteraceae	Steroidobacter	Unassigned
ASV61	93	296	123	129	54	54	240	162	213	155	175	465	1568	1407	674	701	210	6719	Bacteria{superkingdom}(92);Actinobacteria{phylum}(92);Actinobacteria{class}(92);Solirubrobacterales{order}(92);{family}(92);{genus}(92);Unassigned{species}(0)	Bacteria	Actinobacteria	Actinobacteria	Solirubrobacterales			Unassigned
ASV62	267	289	417	210	407	524	283	292	244	230	162	477	164	0	539	272	156	4933	Bacteria{superkingdom}(99);Chloroflexi{phylum}(99);Anaerolineae{class}(99);Anaerolineales{order}(99);Anaerolineaceae{family}(99);{genus}(99);uncultured_soil_bacterium{species}(99)	Bacteria	Chloroflexi	Anaerolineae	Anaerolineales	Anaerolineaceae		uncultured_soil_bacterium
ASV63	0	0	0	0	0	0	0	0	0	43	0	0	0	0	0	0	0	43	Bacteria{superkingdom}(98);Acidobacteria{phylum}(98);Acidobacteria_Gp4{class}(98);{order}(98);{family}(98);Gp4{genus}(98);uncultured_actinobacterium{species}(98)	Bacteria	Acidobacteria	Acidobacteria_Gp4			Gp4	uncultured_actinobacterium
ASV64	350	127	284	282	642	200	71	39	48	70	34	161	48	164	232	165	91	3008	Bacteria{superkingdom}(100);Proteobacteria{phylum}(100);Alphaproteobacteria{class}(100);Rhizobiales{order}(100);Rhizobiaceae{family}(100);Unassigned{genus}(0);Unassigned{species}(0)	Bacteria	Proteobacteria	Alphaproteobacteria	Rhizobiales	Rhizobiaceae	Unassigned	Unassigned
ASV65	109	347	141	244	118	109	488	381	488	483	213	457	238	86	79	312	233	4526	Bacteria{superkingdom}(100);Acidobacteria{phylum}(100);Acidobacteria_Gp6{class}(100);{order}(100);{family}(100);Gp6{genus}(100);Unassigned{species}(0)	Bacteria	Acidobacteria	Acidobacteria_Gp6			Gp6	Unassigned
ASV66	332	109	919	1313	655	626	12	0	121	0	11	0	28	0	0	37	265	4428	Bacteria{superkingdom}(100);Actinobacteria{phylum}(100);Actinobacteria{class}(100);Actinomycetales{order}(100);Pseudonocardiaceae{family}(100);Pseudonocardia{genus}(100);Unassigned{species}(0)	Bacteria	Actinobacteria	Actinobacteria	Actinomycetales	Pseudonocardiaceae	Pseudonocardia	Unassigned
ASV67	165	0	101	612	319	336	0	0	0	0	15	0	223	0	0	0	0	1771	Bacteria{superkingdom}(100);Bacteroidetes{phylum}(100);Sphingobacteriia{class}(100);Sphingobacteriales{order}(100);Chitinophagaceae{family}(100);Chitinophaga{genus}(100);Unassigned{species}(0)	Bacteria	Bacteroidetes	Sphingobacteriia	Sphingobacteriales	Chitinophagaceae	Chitinophaga	Unassigned
ASV68	432	159	101	62	1106	294	9	138	407	0	38	0	132	0	0	22	122	3022	Bacteria{superkingdom}(98);Bacteroidetes{phylum}(98);Sphingobacteriia{class}(98);Sphingobacteriales{order}(98);Chitinophagaceae{family}(98);Chitinophaga{genus}(98);Chitinophaga_japonensis{species}(98)	Bacteria	Bacteroidetes	Sphingobacteriia	Sphingobacteriales	Chitinophagaceae	Chitinophaga	Chitinophaga_japonensis
ASV69	303	87	162	284	171	155	0	19	64	201	42	121	108	280	217	266	184	2664	Bacteria{superkingdom}(100);Proteobacteria{phylum}(100);Alphaproteobacteria{class}(100);Rhizobiales{order}(100);Methylobacteriaceae{family}(100);Microvirga{genus}(100);Unassigned{species}(0)	Bacteria	Proteobacteria	Alphaproteobacteria	Rhizobiales	Methylobacteriaceae	Microvirga	Unassigned
ASV70	88	0	107	49	22	30	143	2352	5041	371	126	1028	276	53	0	0	451	10137	Bacteria{superkingdom}(100);Acidobacteria{phylum}(100);Acidobacteria_Gp4{class}(100);{order}(100);{family}(100);Gp4{genus}(100);Unassigned{species}(0)	Bacteria	Acidobacteria	Acidobacteria_Gp4			Gp4	Unassigned
ASV71	0	45	0	0	0	0	0	0	0	16	0	0	0	8	0	0	0	69	Bacteria{superkingdom}(100);Acidobacteria{phylum}(100);Acidobacteria_Gp4{class}(100);{order}(100);{family}(100);Gp4{genus}(100);uncultured_actinobacterium{species}(100)	Bacteria	Acidobacteria	Acidobacteria_Gp4			Gp4	uncultured_actinobacterium
ASV72	288	0	381	510	1133	193	21	57	0	0	54	0	368	66	13	51	92	3227	Bacteria{superkingdom}(80);Bacteroidetes{phylum}(80);Sphingobacteriia{class}(80);Sphingobacteriales{order}(80);Chitinophagaceae{family}(80);Chitinophaga{genus}(80);uncultured_bacterium{species}(80)	Bacteria	Bacteroidetes	Sphingobacteriia	Sphingobacteriales	Chitinophagaceae	Chitinophaga	uncultured_bacterium
ASV73	369	0	583	549	294	323	39	0	53	49	17	33	47	254	110	395	0	3115	Bacteria{superkingdom}(100);Actinobacteria{phylum}(100);Actinobacteria{class}(100);Actinomycetales{order}(100);Nocardioidaceae{family}(100);Nocardioides{genus}(100);Unassigned{species}(0)	Bacteria	Actinobacteria	Actinobacteria	Actinomycetales	Nocardioidaceae	Nocardioides	Unassigned
ASV74	0	43	30	28	26	27	0	0	0	0	0	533	0	45	132	29	0	893	Bacteria{superkingdom}(99);Proteobacteria{phylum}(99);Betaproteobacteria{class}(99);Burkholderiales{order}(99);Oxalobacteraceae{family}(99);Massilia{genus}(99);Unassigned{species}(0)	Bacteria	Proteobacteria	Betaproteobacteria	Burkholderiales	Oxalobacteraceae	Massilia	Unassigned
ASV75	545	33	393	420	197	413	74	21	169	51	52	83	44	263	328	216	140	3442	Bacteria{superkingdom}(100);Actinobacteria{phylum}(100);Actinobacteria{class}(100);Actinomycetales{order}(100);Nocardioidaceae{family}(100);Nocardioides{genus}(100);Unassigned{species}(0)	Bacteria	Actinobacteria	Actinobacteria	Actinomycetales	Nocardioidaceae	Nocardioides	Unassigned
ASV76	143	72	206	136	164	427	260	104	114	105	78	63	166	38	45	34	234	2389	Bacteria{superkingdom}(100);Proteobacteria{phylum}(100);Alphaproteobacteria{class}(100);Rhodospirillales{order}(100);{family}(100);Reyranella{genus}(100);Unassigned{species}(0)	Bacteria	Proteobacteria	Alphaproteobacteria	Rhodospirillales		Reyranella	Unassigned
ASV78	549	169	330	216	176	509	53	380	143	283	43	272	178	0	51	279	489	4120	Bacteria{superkingdom}(100);Actinobacteria{phylum}(100);Actinobacteria{class}(100);Actinomycetales{order}(100);Nocardioidaceae{family}(100);Nocardioides{genus}(100);Unassigned{species}(0)	Bacteria	Actinobacteria	Actinobacteria	Actinomycetales	Nocardioidaceae	Nocardioides	Unassigned
ASV79	186	63	161	86	113	138	961	688	810	560	170	604	114	244	654	424	512	6488	Bacteria{superkingdom}(100);Acidobacteria{phylum}(100);Acidobacteria_Gp6{class}(100);{order}(100);{family}(100);Gp6{genus}(100);Unassigned{species}(0)	Bacteria	Acidobacteria	Acidobacteria_Gp6			Gp6	Unassigned
ASV80	306	13	130	329	944	139	67	43	66	0	0	0	111	0	12	17	132	2309	Bacteria{superkingdom}(100);Proteobacteria{phylum}(100);Gammaproteobacteria{class}(100);Xanthomonadales{order}(100);Xanthomonadaceae{family}(100);Pseudoxanthomonas{genus}(100);Unassigned{species}(0)	Bacteria	Proteobacteria	Gammaproteobacteria	Xanthomonadales	Xanthomonadaceae	Pseudoxanthomonas	Unassigned
ASV81	91	124	183	377	905	649	62	54	27	46	39	3	521	109	4	56	174	3424	Bacteria{superkingdom}(100);Proteobacteria{phylum}(100);Gammaproteobacteria{class}(100);Xanthomonadales{order}(100);Sinobacteraceae{family}(100);Steroidobacter{genus}(100);Unassigned{species}(0)	Bacteria	Proteobacteria	Gammaproteobacteria	Xanthomonadales	Sinobacteraceae	Steroidobacter	Unassigned
ASV82	88	472	34	79	31	32	63	29	84	357	114	63	0	129	29	25	288	1917	Bacteria{superkingdom}(83);Acidobacteria{phylum}(83);Acidobacteria_Gp4{class}(83);{order}(83);{family}(83);Gp4{genus}(83);Acidobacterium_sp._Ac_12_G8{species}(83)	Bacteria	Acidobacteria	Acidobacteria_Gp4			Gp4	Acidobacterium_sp._Ac_12_G8
ASV83	196	61	399	203	262	84	295	51	91	70	56	55	19	34	14	28	112	2030	Bacteria{superkingdom}(100);Proteobacteria{phylum}(100);Gammaproteobacteria{class}(100);Xanthomonadales{order}(100);Sinobacteraceae{family}(100);Steroidobacter{genus}(100);Unassigned{species}(0)	Bacteria	Proteobacteria	Gammaproteobacteria	Xanthomonadales	Sinobacteraceae	Steroidobacter	Unassigned
ASV84	178	54	130	89	347	249	39	0	221	66	21	17	69	28	0	0	136	1644	Bacteria{superkingdom}(83);Bacteroidetes{phylum}(83);Sphingobacteriia{class}(83);Sphingobacteriales{order}(83);Chitinophagaceae{family}(83);{genus}(83);Unassigned{species}(0)	Bacteria	Bacteroidetes	Sphingobacteriia	Sphingobacteriales	Chitinophagaceae		Unassigned
ASV85	150	144	146	254	409	347	0	0	728	488	45	50	218	29	0	0	17	3025	Bacteria{superkingdom}(100);Acidobacteria{phylum}(100);Acidobacteria_Gp7{class}(100);{order}(100);{family}(100);Gp7{genus}(100);Unassigned{species}(0)	Bacteria	Acidobacteria	Acidobacteria_Gp7			Gp7	Unassigned
ASV86	0	0	0	58	0	51	0	0	0	0	0	0	0	0	0	0	0	109	Bacteria{superkingdom}(90);Proteobacteria{phylum}(90);Gammaproteobacteria{class}(90);Xanthomonadales{order}(90);Sinobacteraceae{family}(90);Steroidobacter{genus}(90);uncultured_gamma_proteobacterium{species}(90)	Bacteria	Proteobacteria	Gammaproteobacteria	Xanthomonadales	Sinobacteraceae	Steroidobacter	uncultured_gamma_proteobacterium
ASV87	138	0	0	83	60	32	0	167	330	361	67	180	196	115	0	0	74	1803	Bacteria{superkingdom}(100);Acidobacteria{phylum}(100);Acidobacteria_Gp4{class}(100);{order}(100);{family}(100);Gp4{genus}(100);Unassigned{species}(0)	Bacteria	Acidobacteria	Acidobacteria_Gp4			Gp4	Unassigned
ASV88	117	86	661	174	229	154	539	214	315	212	275	215	863	517	843	593	453	6460	Bacteria{superkingdom}(98);Actinobacteria{phylum}(98);Actinobacteria{class}(98);Acidimicrobiales{order}(98);Acidimicrobineae_incertae_sedis{family}(98);Aciditerrimonas{genus}(98);uncultured_Acidimicrobiales_bacterium{species}(98)	Bacteria	Actinobacteria	Actinobacteria	Acidimicrobiales	Acidimicrobineae_incertae_sedis	Aciditerrimonas	uncultured_Acidimicrobiales_bacterium
ASV89	130	109	104	119	82	306	243	299	94	97	99	111	489	174	177	0	148	2781	Bacteria{superkingdom}(99);Acidobacteria{phylum}(99);Acidobacteria_Gp6{class}(99);{order}(99);{family}(99);Gp6{genus}(99);Unassigned{species}(0)	Bacteria	Acidobacteria	Acidobacteria_Gp6			Gp6	Unassigned
ASV90	254	186	120	252	199	309	74	59	101	91	55	70	114	151	124	170	161	2490	Bacteria{superkingdom}(98);Proteobacteria{phylum}(98);Alphaproteobacteria{class}(98);Rhizobiales{order}(98);Bradyrhizobiaceae{family}(98);{genus}(98);Unassigned{species}(0)	Bacteria	Proteobacteria	Alphaproteobacteria	Rhizobiales	Bradyrhizobiaceae		Unassigned
ASV91	98	269	172	62	104	230	284	124	96	0	71	32	48	0	0	0	77	1667	Bacteria{superkingdom}(100);Acidobacteria{phylum}(100);Acidobacteria_Gp6{class}(100);{order}(100);{family}(100);Gp6{genus}(100);Unassigned{species}(0)	Bacteria	Acidobacteria	Acidobacteria_Gp6			Gp6	Unassigned
ASV92	1685	0	240	52	382	18	521	44	687	381	411	15	605	70	0	0	17	5128	Bacteria{superkingdom}(96);Firmicutes{phylum}(96);Bacilli{class}(96);Bacillales{order}(96);Bacillaceae_1{family}(96);Bacillus{genus}(96);Unassigned{species}(0)	Bacteria	Firmicutes	Bacilli	Bacillales	Bacillaceae_1	Bacillus	Unassigned
ASV93	0	0	135	543	0	0	92	0	76	102	0	0	0	0	0	0	0	948	Bacteria{superkingdom}(100);Actinobacteria{phylum}(100);Actinobacteria{class}(100);Actinomycetales{order}(100);Streptomycetaceae{family}(100);Streptomyces{genus}(100);Unassigned{species}(0)	Bacteria	Actinobacteria	Actinobacteria	Actinomycetales	Streptomycetaceae	Streptomyces	Unassigned
ASV94	0	38	113	1381	724	0	0	48	84	82	0	95	0	0	0	7	0	2572	Bacteria{superkingdom}(92);Actinobacteria{phylum}(92);Actinobacteria{class}(92);Actinomycetales{order}(92);Pseudonocardiaceae{family}(92);Actinophytocola{genus}(92);uncultured_bacterium{species}(92)	Bacteria	Actinobacteria	Actinobacteria	Actinomycetales	Pseudonocardiaceae	Actinophytocola	uncultured_bacterium
ASV95	127	54	337	38	111	515	182	20	30	13	2	0	0	0	0	5	0	1434	Bacteria{superkingdom}(100);Acidobacteria{phylum}(100);Acidobacteria_Gp4{class}(100);{order}(100);{family}(100);Gp4{genus}(100);Unassigned{species}(0)	Bacteria	Acidobacteria	Acidobacteria_Gp4			Gp4	Unassigned
ASV97	767	119	535	872	608	533	48	0	106	81	29	0	15	32	58	0	201	4004	Bacteria{superkingdom}(89);Proteobacteria{phylum}(89);Alphaproteobacteria{class}(89);Sphingomonadales{order}(89);Sphingomonadaceae{family}(89);Novosphingobium{genus}(89);Unassigned{species}(0)	Bacteria	Proteobacteria	Alphaproteobacteria	Sphingomonadales	Sphingomonadaceae	Novosphingobium	Unassigned
ASV98	145	0	376	207	151	323	0	42	0	0	16	0	0	43	0	0	66	1369	Bacteria{superkingdom}(94);Bacteroidetes{phylum}(94);Sphingobacteriia{class}(94);Sphingobacteriales{order}(94);Chitinophagaceae{family}(94);{genus}(94);uncultured_Cytophaga_sp.{species}(94)	Bacteria	Bacteroidetes	Sphingobacteriia	Sphingobacteriales	Chitinophagaceae		uncultured_Cytophaga_sp.
ASV99	352	38	248	400	90	381	462	145	227	9	59	140	208	149	19	531	388	3846	Bacteria{superkingdom}(100);Chloroflexi{phylum}(100);Thermomicrobia{class}(100);Unassigned{order}(0);Unassigned{family}(0);Unassigned{genus}(0);Unassigned{species}(0)	Bacteria	Chloroflexi	Thermomicrobia	Unassigned	Unassigned	Unassigned	Unassigned
ASV100	118	66	59	218	102	180	115	0	56	49	30	0	39	34	0	0	49	1115	Bacteria{superkingdom}(100);Actinobacteria{phylum}(100);Actinobacteria{class}(100);Actinomycetales{order}(100);Micromonosporaceae{family}(100);Unassigned{genus}(0);Unassigned{species}(0)	Bacteria	Actinobacteria	Actinobacteria	Actinomycetales	Micromonosporaceae	Unassigned	Unassigned
ASV101	0	0	93	367	0	0	93	233	0	881	283	343	0	376	1023	1073	0	4765	Bacteria{superkingdom}(97);Actinobacteria{phylum}(97);Actinobacteria{class}(97);Actinomycetales{order}(97);Micrococcaceae{family}(97);Arthrobacter{genus}(97);Unassigned{species}(0)	Bacteria	Actinobacteria	Actinobacteria	Actinomycetales	Micrococcaceae	Arthrobacter	Unassigned
ASV102	256	16	102	171	242	176	26	0	18	40	0	58	45	19	53	30	42	1294	Bacteria{superkingdom}(92);Proteobacteria{phylum}(92);Alphaproteobacteria{class}(92);Rhizobiales{order}(92);Rhizobiaceae{family}(92);Neorhizobium{genus}(92);Unassigned{species}(0)	Bacteria	Proteobacteria	Alphaproteobacteria	Rhizobiales	Rhizobiaceae	Neorhizobium	Unassigned
ASV103	112	0	167	105	589	55	0	0	50	51	0	0	0	0	10	0	6	1145	Bacteria{superkingdom}(98);Bacteroidetes{phylum}(98);Cytophagia{class}(98);Cytophagales{order}(98);Cytophagaceae{family}(98);Dyadobacter{genus}(98);Dyadobacter_fermentans{species}(98)	Bacteria	Bacteroidetes	Cytophagia	Cytophagales	Cytophagaceae	Dyadobacter	Dyadobacter_fermentans
ASV104	0	0	0	0	0	0	0	0	54	0	0	124	0	237	203	73	0	691	Bacteria{superkingdom}(100);Actinobacteria{phylum}(100);Actinobacteria{class}(100);Actinomycetales{order}(100);Streptomycetaceae{family}(100);Streptomyces{genus}(100);Unassigned{species}(0)	Bacteria	Actinobacteria	Actinobacteria	Actinomycetales	Streptomycetaceae	Streptomyces	Unassigned
ASV105	103	0	194	271	210	568	85	0	0	0	24	0	80	0	0	0	56	1591	Bacteria{superkingdom}(100);Acidobacteria{phylum}(100);Acidobacteria_Gp6{class}(100);{order}(100);{family}(100);Gp6{genus}(100);Unassigned{species}(0)	Bacteria	Acidobacteria	Acidobacteria_Gp6			Gp6	Unassigned
ASV106	270	253	285	0	710	235	77	0	111	164	65	42	427	25	22	33	0	2719	Bacteria{superkingdom}(100);Actinobacteria{phylum}(100);Actinobacteria{class}(100);Actinomycetales{order}(100);Streptomycetaceae{family}(100);Streptomyces{genus}(100);Unassigned{species}(0)	Bacteria	Actinobacteria	Actinobacteria	Actinomycetales	Streptomycetaceae	Streptomyces	Unassigned
ASV108	30	0	367	30	986	213	197	173	400	49	157	682	1103	209	8	0	448	5052	Bacteria{superkingdom}(100);Proteobacteria{phylum}(100);Alphaproteobacteria{class}(100);Rhizobiales{order}(100);Methylobacteriaceae{family}(100);Microvirga{genus}(100);Unassigned{species}(0)	Bacteria	Proteobacteria	Alphaproteobacteria	Rhizobiales	Methylobacteriaceae	Microvirga	Unassigned
ASV109	168	143	0	0	41	68	0	0	0	0	0	0	18	0	0	0	0	438	Bacteria{superkingdom}(94);Acidobacteria{phylum}(94);Acidobacteria_Gp4{class}(94);{order}(94);{family}(94);Gp4{genus}(94);uncultured_Rhodopseudomonas_sp.{species}(94)	Bacteria	Acidobacteria	Acidobacteria_Gp4			Gp4	uncultured_Rhodopseudomonas_sp.
ASV110	0	216	48	0	52	0	205	61	800	205	182	86	189	325	377	305	521	3572	Bacteria{superkingdom}(86);Bacteroidetes{phylum}(86);Sphingobacteriia{class}(86);Sphingobacteriales{order}(86);Chitinophagaceae{family}(86);{genus}(86);Unassigned{species}(0)	Bacteria	Bacteroidetes	Sphingobacteriia	Sphingobacteriales	Chitinophagaceae		Unassigned
ASV111	129	26	145	158	155	148	272	591	555	186	413	309	336	209	419	56	164	4271	Bacteria{superkingdom}(99);Chloroflexi{phylum}(99);Unassigned{class}(0);Unassigned{order}(0);Unassigned{family}(0);Unassigned{genus}(0);Unassigned{species}(0)	Bacteria	Chloroflexi	Unassigned	Unassigned	Unassigned	Unassigned	Unassigned
ASV112	0	151	44	0	0	0	0	2087	724	457	0	1265	0	0	0	0	0	4728	Bacteria{superkingdom}(100);Acidobacteria{phylum}(100);Acidobacteria_Gp4{class}(100);{order}(100);{family}(100);Gp4{genus}(100);Unassigned{species}(0)	Bacteria	Acidobacteria	Acidobacteria_Gp4			Gp4	Unassigned
ASV115	108	70	121	89	75	101	327	118	131	174	221	132	320	354	208	145	143	2837	Bacteria{superkingdom}(100);Actinobacteria{phylum}(100);Actinobacteria{class}(100);Actinomycetales{order}(100);Nocardiaceae{family}(100);Rhodococcus{genus}(100);Unassigned{species}(0)	Bacteria	Actinobacteria	Actinobacteria	Actinomycetales	Nocardiaceae	Rhodococcus	Unassigned
ASV116	314	200	210	144	172	285	96	0	38	84	47	70	20	0	48	102	34	1864	Bacteria{superkingdom}(100);Gemmatimonadetes{phylum}(100);Gemmatimonadetes{class}(100);Gemmatimonadales{order}(100);Gemmatimonadaceae{family}(100);Gemmatimonas{genus}(100);Unassigned{species}(0)	Bacteria	Gemmatimonadetes	Gemmatimonadetes	Gemmatimonadales	Gemmatimonadaceae	Gemmatimonas	Unassigned
ASV117	224	199	247	176	137	221	131	142	0	110	41	127	86	100	221	319	128	2609	Bacteria{superkingdom}(100);Actinobacteria{phylum}(100);Actinobacteria{class}(100);Solirubrobacterales{order}(100);Solirubrobacteraceae{family}(100);Solirubrobacter{genus}(100);Unassigned{species}(0)	Bacteria	Actinobacteria	Actinobacteria	Solirubrobacterales	Solirubrobacteraceae	Solirubrobacter	Unassigned
ASV118	49	26	434	981	990	349	40	20	0	287	118	11	0	0	0	0	0	3305	Bacteria{superkingdom}(81);Bacteroidetes{phylum}(81);Sphingobacteriia{class}(81);Sphingobacteriales{order}(81);Chitinophagaceae{family}(81);Niastella{genus}(81);Unassigned{species}(0)	Bacteria	Bacteroidetes	Sphingobacteriia	Sphingobacteriales	Chitinophagaceae	Niastella	Unassigned
ASV119	142	124	59	241	165	237	0	24	0	38	37	34	307	0	166	0	66	1640	Bacteria{superkingdom}(100);Proteobacteria{phylum}(100);Alphaproteobacteria{class}(100);Rhodospirillales{order}(100);Rhodospirillaceae{family}(100);Dongia{genus}(100);Unassigned{species}(0)	Bacteria	Proteobacteria	Alphaproteobacteria	Rhodospirillales	Rhodospirillaceae	Dongia	Unassigned
ASV120	116	145	133	125	76	56	373	341	142	490	163	238	556	298	747	252	465	4716	Bacteria{superkingdom}(94);Proteobacteria{phylum}(94);Betaproteobacteria{class}(94);{order}(94);{family}(94);{genus}(94);Unassigned{species}(0)	Bacteria	Proteobacteria	Betaproteobacteria				Unassigned
ASV121	159	0	81	688	101	545	0	0	0	0	0	0	0	13	0	53	0	1640	Bacteria{superkingdom}(100);Actinobacteria{phylum}(100);Actinobacteria{class}(100);Actinomycetales{order}(100);Nocardioidaceae{family}(100);Kribbella{genus}(100);Unassigned{species}(0)	Bacteria	Actinobacteria	Actinobacteria	Actinomycetales	Nocardioidaceae	Kribbella	Unassigned
ASV123	160	270	189	134	226	93	83	22	116	198	65	103	0	22	0	0	0	1681	Bacteria{superkingdom}(100);Proteobacteria{phylum}(100);Deltaproteobacteria{class}(100);{order}(100);{family}(100);{genus}(100);Unassigned{species}(0)	Bacteria	Proteobacteria	Deltaproteobacteria				Unassigned
ASV124	179	411	524	212	173	411	77	68	39	217	0	99	0	12	0	254	0	2676	Bacteria{superkingdom}(96);Actinobacteria{phylum}(96);Actinobacteria{class}(96);Solirubrobacterales{order}(96);Conexibacteraceae{family}(96);Conexibacter{genus}(96);Unassigned{species}(0)	Bacteria	Actinobacteria	Actinobacteria	Solirubrobacterales	Conexibacteraceae	Conexibacter	Unassigned
ASV125	8	2	15	150	48	155	12	4	11	25	4	1	3	6	2	16	21	483	Bacteria{superkingdom}(100);Proteobacteria{phylum}(100);Gammaproteobacteria{class}(100);Xanthomonadales{order}(100);Sinobacteraceae{family}(100);Steroidobacter{genus}(100);Unassigned{species}(0)	Bacteria	Proteobacteria	Gammaproteobacteria	Xanthomonadales	Sinobacteraceae	Steroidobacter	Unassigned
ASV126	312	129	139	0	64	744	0	0	0	0	0	0	0	0	0	0	0	1388	Bacteria{superkingdom}(100);Actinobacteria{phylum}(100);Actinobacteria{class}(100);Actinomycetales{order}(100);Pseudonocardiaceae{family}(100);Unassigned{genus}(0);Unassigned{species}(0)	Bacteria	Actinobacteria	Actinobacteria	Actinomycetales	Pseudonocardiaceae	Unassigned	Unassigned
ASV127	0	0	0	70	57	256	0	0	0	0	0	0	115	0	0	0	0	498	Bacteria{superkingdom}(100);Candidatus_Saccharibacteria{phylum}(100);{class}(100);{order}(100);{family}(100);Saccharibacteria_genera_incertae_sedis{genus}(100);Unassigned{species}(0)	Bacteria	Candidatus_Saccharibacteria				Saccharibacteria_genera_incertae_sedis	Unassigned
ASV128	176	145	173	195	119	247	103	98	101	71	58	64	169	127	112	80	168	2206	Bacteria{superkingdom}(96);Proteobacteria{phylum}(96);Alphaproteobacteria{class}(96);Rhizobiales{order}(96);{family}(96);{genus}(96);Unassigned{species}(0)	Bacteria	Proteobacteria	Alphaproteobacteria	Rhizobiales			Unassigned
ASV129	0	0	0	0	21	0	0	0	0	0	0	0	0	0	0	0	0	21	Bacteria{superkingdom}(99);Acidobacteria{phylum}(99);Acidobacteria_Gp4{class}(99);{order}(99);{family}(99);Gp4{genus}(99);Unassigned{species}(0)	Bacteria	Acidobacteria	Acidobacteria_Gp4			Gp4	Unassigned
ASV130	202	151	123	133	132	225	112	31	65	65	0	67	25	0	56	322	0	1709	Bacteria{superkingdom}(100);Actinobacteria{phylum}(100);Actinobacteria{class}(100);Acidimicrobiales{order}(100);Acidimicrobiaceae{family}(100);Ilumatobacter{genus}(100);Unassigned{species}(0)	Bacteria	Actinobacteria	Actinobacteria	Acidimicrobiales	Acidimicrobiaceae	Ilumatobacter	Unassigned
ASV131	210	0	95	191	147	803	0	0	9	0	0	0	0	26	0	14	0	1495	Bacteria{superkingdom}(100);Actinobacteria{phylum}(100);Actinobacteria{class}(100);Actinomycetales{order}(100);Jiangellaceae{family}(100);Unassigned{genus}(0);Unassigned{species}(0)	Bacteria	Actinobacteria	Actinobacteria	Actinomycetales	Jiangellaceae	Unassigned	Unassigned
ASV132	411	0	209	119	400	164	40	22	62	38	27	50	16	115	60	34	0	1767	Bacteria{superkingdom}(100);Chloroflexi{phylum}(100);Thermomicrobia{class}(100);Sphaerobacterales{order}(100);Sphaerobacteraceae{family}(100);Sphaerobacter{genus}(100);uncultured_bacterium{species}(100)	Bacteria	Chloroflexi	Thermomicrobia	Sphaerobacterales	Sphaerobacteraceae	Sphaerobacter	uncultured_bacterium
ASV133	159	66	373	0	96	177	88	0	0	0	0	0	0	0	0	0	0	959	Bacteria{superkingdom}(100);Acidobacteria{phylum}(100);Acidobacteria_Gp6{class}(100);{order}(100);{family}(100);Gp6{genus}(100);Unassigned{species}(0)	Bacteria	Acidobacteria	Acidobacteria_Gp6			Gp6	Unassigned
ASV134	104	83	154	119	76	101	161	177	221	169	130	336	340	132	140	150	224	2817	Bacteria{superkingdom}(89);Actinobacteria{phylum}(89);Actinobacteria{class}(89);Actinomycetales{order}(89);Nocardioidaceae{family}(89);Marmoricola{genus}(89);Unassigned{species}(0)	Bacteria	Actinobacteria	Actinobacteria	Actinomycetales	Nocardioidaceae	Marmoricola	Unassigned
ASV135	534	0	261	98	306	95	121	40	173	276	0	0	0	0	0	13	0	1917	Bacteria{superkingdom}(100);Firmicutes{phylum}(100);Bacilli{class}(100);Bacillales{order}(100);Bacillaceae_1{family}(100);Bacillus{genus}(100);Unassigned{species}(0)	Bacteria	Firmicutes	Bacilli	Bacillales	Bacillaceae_1	Bacillus	Unassigned
ASV136	31	0	18	487	183	267	0	0	0	0	10	11	0	13	24	12	57	1113	Bacteria{superkingdom}(99);Proteobacteria{phylum}(99);Gammaproteobacteria{class}(99);Xanthomonadales{order}(99);Xanthomonadaceae{family}(99);Luteimonas{genus}(99);Unassigned{species}(0)	Bacteria	Proteobacteria	Gammaproteobacteria	Xanthomonadales	Xanthomonadaceae	Luteimonas	Unassigned
ASV137	59	0	0	49	93	114	0	0	0	0	0	0	0	0	0	0	0	315	Bacteria{superkingdom}(92);Proteobacteria{phylum}(92);Gammaproteobacteria{class}(92);Xanthomonadales{order}(92);Sinobacteraceae{family}(92);Unassigned{genus}(0);Unassigned{species}(0)	Bacteria	Proteobacteria	Gammaproteobacteria	Xanthomonadales	Sinobacteraceae	Unassigned	Unassigned
ASV138	306	123	76	229	439	27	0	177	248	286	14	599	350	148	475	389	296	4182	Bacteria{superkingdom}(100);Actinobacteria{phylum}(100);Actinobacteria{class}(100);Actinomycetales{order}(100);Micrococcaceae{family}(100);Arthrobacter{genus}(100);Unassigned{species}(0)	Bacteria	Actinobacteria	Actinobacteria	Actinomycetales	Micrococcaceae	Arthrobacter	Unassigned
ASV139	137	130	197	40	142	119	248	91	142	162	134	105	171	192	108	70	54	2242	Bacteria{superkingdom}(100);Proteobacteria{phylum}(100);Betaproteobacteria{class}(100);{order}(100);{family}(100);{genus}(100);Unassigned{species}(0)	Bacteria	Proteobacteria	Betaproteobacteria				Unassigned
ASV140	31	71	26	34	36	0	59	370	253	379	67	183	62	393	590	841	384	3779	Bacteria{superkingdom}(94);Proteobacteria{phylum}(94);Alphaproteobacteria{class}(94);Rhizobiales{order}(94);Methylobacteriaceae{family}(94);Microvirga{genus}(94);Unassigned{species}(0)	Bacteria	Proteobacteria	Alphaproteobacteria	Rhizobiales	Methylobacteriaceae	Microvirga	Unassigned
ASV141	239	0	127	329	215	95	426	83	47	0	196	262	110	0	0	0	0	2129	Bacteria{superkingdom}(95);Firmicutes{phylum}(95);Bacilli{class}(95);Bacillales{order}(95);Bacillaceae_1{family}(95);Bacillus{genus}(95);Bacillus_funiculus{species}(95)	Bacteria	Firmicutes	Bacilli	Bacillales	Bacillaceae_1	Bacillus	Bacillus_funiculus
ASV142	164	146	121	297	148	310	0	0	0	51	0	0	52	0	0	0	0	1289	Bacteria{superkingdom}(97);Proteobacteria{phylum}(97);Alphaproteobacteria{class}(97);Rhodospirillales{order}(97);Rhodospirillaceae{family}(97);Dongia{genus}(97);Unassigned{species}(0)	Bacteria	Proteobacteria	Alphaproteobacteria	Rhodospirillales	Rhodospirillaceae	Dongia	Unassigned
ASV143	131	195	259	56	140	158	77	113	54	31	112	60	167	166	169	123	206	2217	Bacteria{superkingdom}(86);Actinobacteria{phylum}(86);Actinobacteria{class}(86);{order}(86);{family}(86);{genus}(86);Unassigned{species}(0)	Bacteria	Actinobacteria	Actinobacteria				Unassigned
ASV144	60	108	0	32	194	16	0	4528	27	88	0	253	0	0	0	0	0	5306	Bacteria{superkingdom}(91);Acidobacteria{phylum}(91);Acidobacteria_Gp7{class}(91);{order}(91);{family}(91);Gp7{genus}(91);uncultured_Anaeromyxobacter_sp.{species}(91)	Bacteria	Acidobacteria	Acidobacteria_Gp7			Gp7	uncultured_Anaeromyxobacter_sp.
ASV145	84	0	92	156	185	347	10	20	42	42	32	16	85	10	6	0	17	1144	Bacteria{superkingdom}(100);Chloroflexi{phylum}(100);Caldilineae{class}(100);Caldilineales{order}(100);Caldilineaceae{family}(100);Litorilinea{genus}(100);uncultured_Litorilinea_sp.{species}(100)	Bacteria	Chloroflexi	Caldilineae	Caldilineales	Caldilineaceae	Litorilinea	uncultured_Litorilinea_sp.
ASV146	61	26	155	521	526	529	21	0	17	165	0	0	0	0	0	0	0	2021	Bacteria{superkingdom}(81);Bacteroidetes{phylum}(81);Sphingobacteriia{class}(81);Sphingobacteriales{order}(81);Chitinophagaceae{family}(81);{genus}(81);uncultured_Cytophaga_sp.{species}(81)	Bacteria	Bacteroidetes	Sphingobacteriia	Sphingobacteriales	Chitinophagaceae		uncultured_Cytophaga_sp.
ASV147	156	0	149	151	35	251	33	53	47	0	0	83	84	69	31	775	72	1989	Bacteria{superkingdom}(99);Chloroflexi{phylum}(99);Thermomicrobia{class}(99);Sphaerobacterales{order}(99);Sphaerobacteraceae{family}(99);Unassigned{genus}(0);Unassigned{species}(0)	Bacteria	Chloroflexi	Thermomicrobia	Sphaerobacterales	Sphaerobacteraceae	Unassigned	Unassigned
ASV148	119	0	48	20	35	188	32	89	83	36	51	34	88	46	129	90	93	1181	Bacteria{superkingdom}(100);Chloroflexi{phylum}(100);Caldilineae{class}(100);Caldilineales{order}(100);Caldilineaceae{family}(100);Litorilinea{genus}(100);uncultured_Litorilinea_sp.{species}(100)	Bacteria	Chloroflexi	Caldilineae	Caldilineales	Caldilineaceae	Litorilinea	uncultured_Litorilinea_sp.
ASV149	202	182	83	113	0	60	0	364	386	139	48	431	0	0	0	41	0	2049	Bacteria{superkingdom}(100);Acidobacteria{phylum}(100);Acidobacteria_Gp4{class}(100);{order}(100);{family}(100);Gp4{genus}(100);Unassigned{species}(0)	Bacteria	Acidobacteria	Acidobacteria_Gp4			Gp4	Unassigned
ASV150	0	0	107	991	286	3410	0	0	0	8	76	0	0	0	0	0	0	4878	Bacteria{superkingdom}(100);Actinobacteria{phylum}(100);Actinobacteria{class}(100);Actinomycetales{order}(100);Streptosporangiaceae{family}(100);Nonomuraea{genus}(100);Unassigned{species}(0)	Bacteria	Actinobacteria	Actinobacteria	Actinomycetales	Streptosporangiaceae	Nonomuraea	Unassigned
ASV151	96	0	101	82	0	0	119	94	0	0	0	0	0	0	0	0	0	492	Bacteria{superkingdom}(100);Proteobacteria{phylum}(100);Gammaproteobacteria{class}(100);Xanthomonadales{order}(100);Sinobacteraceae{family}(100);Steroidobacter{genus}(100);Unassigned{species}(0)	Bacteria	Proteobacteria	Gammaproteobacteria	Xanthomonadales	Sinobacteraceae	Steroidobacter	Unassigned
ASV153	111	24	45	40	29	48	48	1278	387	680	74	478	0	97	27	79	281	3726	Bacteria{superkingdom}(100);Actinobacteria{phylum}(100);Actinobacteria{class}(100);{order}(100);{family}(100);{genus}(100);Unassigned{species}(0)	Bacteria	Actinobacteria	Actinobacteria				Unassigned
ASV154	27	0	92	157	140	0	38	450	173	278	236	215	317	0	69	0	242	2434	Bacteria{superkingdom}(100);Bacteroidetes{phylum}(100);Cytophagia{class}(100);Cytophagales{order}(100);Cytophagaceae{family}(100);Adhaeribacter{genus}(100);Unassigned{species}(0)	Bacteria	Bacteroidetes	Cytophagia	Cytophagales	Cytophagaceae	Adhaeribacter	Unassigned
ASV155	171	48	149	166	683	313	28	0	0	0	20	0	0	39	0	28	0	1645	Bacteria{superkingdom}(100);Bacteroidetes{phylum}(100);Sphingobacteriia{class}(100);Sphingobacteriales{order}(100);Chitinophagaceae{family}(100);Flavitalea{genus}(100);Unassigned{species}(0)	Bacteria	Bacteroidetes	Sphingobacteriia	Sphingobacteriales	Chitinophagaceae	Flavitalea	Unassigned
ASV156	49	83	290	86	100	377	30	0	0	0	0	0	53	36	32	0	35	1171	Bacteria{superkingdom}(100);Verrucomicrobia{phylum}(100);Opitutae{class}(100);Opitutales{order}(100);Opitutaceae{family}(100);Opitutus{genus}(100);Unassigned{species}(0)	Bacteria	Verrucomicrobia	Opitutae	Opitutales	Opitutaceae	Opitutus	Unassigned
ASV157	254	154	178	67	221	146	419	253	269	198	125	238	134	21	56	13	129	2875	Bacteria{superkingdom}(100);Acidobacteria{phylum}(100);Acidobacteria_Gp6{class}(100);{order}(100);{family}(100);Gp6{genus}(100);Unassigned{species}(0)	Bacteria	Acidobacteria	Acidobacteria_Gp6			Gp6	Unassigned
ASV158	71	0	132	54	0	74	542	212	523	206	141	282	207	79	917	42	486	3968	Bacteria{superkingdom}(100);Actinobacteria{phylum}(100);Actinobacteria{class}(100);Solirubrobacterales{order}(100);Unassigned{family}(0);Unassigned{genus}(0);Unassigned{species}(0)	Bacteria	Actinobacteria	Actinobacteria	Solirubrobacterales	Unassigned	Unassigned	Unassigned
ASV159	0	0	0	62	0	0	0	0	0	0	0	0	0	0	0	0	0	62	Bacteria{superkingdom}(90);Actinobacteria{phylum}(90);Actinobacteria{class}(90);Actinomycetales{order}(90);Glycomycetaceae{family}(90);Glycomyces{genus}(90);Glycomyces_scopariae{species}(90)	Bacteria	Actinobacteria	Actinobacteria	Actinomycetales	Glycomycetaceae	Glycomyces	Glycomyces_scopariae
ASV160	290	21	156	114	122	178	125	38	129	37	42	24	74	53	73	54	77	1607	Bacteria{superkingdom}(97);Proteobacteria{phylum}(97);Alphaproteobacteria{class}(97);Rhizobiales{order}(97);Xanthobacteraceae{family}(97);Pseudolabrys{genus}(97);Unassigned{species}(0)	Bacteria	Proteobacteria	Alphaproteobacteria	Rhizobiales	Xanthobacteraceae	Pseudolabrys	Unassigned
ASV161	147	26	217	100	118	138	319	194	206	281	187	106	90	103	229	90	99	2650	Bacteria{superkingdom}(99);Chloroflexi{phylum}(99);Chloroflexia{class}(99);{order}(99);{family}(99);{genus}(99);uncultured_bacterium{species}(99)	Bacteria	Chloroflexi	Chloroflexia				uncultured_bacterium
ASV162	178	319	130	145	54	200	41	0	103	0	0	0	0	117	0	59	0	1346	Bacteria{superkingdom}(100);Acidobacteria{phylum}(100);Acidobacteria_Gp6{class}(100);{order}(100);{family}(100);Gp6{genus}(100);Unassigned{species}(0)	Bacteria	Acidobacteria	Acidobacteria_Gp6			Gp6	Unassigned
ASV163	171	115	197	174	124	94	41	77	110	79	72	191	175	0	135	0	26	1781	Bacteria{superkingdom}(100);Actinobacteria{phylum}(100);Actinobacteria{class}(100);Actinomycetales{order}(100);Nocardioidaceae{family}(100);Nocardioides{genus}(100);Unassigned{species}(0)	Bacteria	Actinobacteria	Actinobacteria	Actinomycetales	Nocardioidaceae	Nocardioides	Unassigned
ASV164	0	0	0	101	0	88	0	0	53	76	0	0	0	0	0	0	0	318	Bacteria{superkingdom}(100);Actinobacteria{phylum}(100);Actinobacteria{class}(100);Actinomycetales{order}(100);Micromonosporaceae{family}(100);Unassigned{genus}(0);Unassigned{species}(0)	Bacteria	Actinobacteria	Actinobacteria	Actinomycetales	Micromonosporaceae	Unassigned	Unassigned
ASV165	99	304	58	101	367	62	0	0	0	8	8	17	42	0	0	0	120	1186	Bacteria{superkingdom}(100);Bacteroidetes{phylum}(100);Cytophagia{class}(100);Cytophagales{order}(100);{family}(100);Chryseolinea{genus}(100);Unassigned{species}(0)	Bacteria	Bacteroidetes	Cytophagia	Cytophagales		Chryseolinea	Unassigned
ASV166	52	63	131	77	486	90	18	35	42	73	43	65	122	481	173	215	79	2245	Bacteria{superkingdom}(84);Acidobacteria{phylum}(84);Acidobacteria_Gp3{class}(84);{order}(84);{family}(84);{genus}(84);uncultured_Bacillus_sp.{species}(84)	Bacteria	Acidobacteria	Acidobacteria_Gp3				uncultured_Bacillus_sp.
ASV167	8	11	6	89	4	4	511	166	116	194	256	266	319	548	1501	223	322	4544	Bacteria{superkingdom}(82);Actinobacteria{phylum}(82);Actinobacteria{class}(82);Acidimicrobiales{order}(82);Acidimicrobineae_incertae_sedis{family}(82);Aciditerrimonas{genus}(82);uncultured_Acidimicrobiales_bacterium{species}(82)	Bacteria	Actinobacteria	Actinobacteria	Acidimicrobiales	Acidimicrobineae_incertae_sedis	Aciditerrimonas	uncultured_Acidimicrobiales_bacterium
ASV168	146	122	120	138	139	176	68	28	21	84	25	52	0	47	35	108	62	1371	Bacteria{superkingdom}(100);Actinobacteria{phylum}(100);Actinobacteria{class}(100);Solirubrobacterales{order}(100);Solirubrobacteraceae{family}(100);Solirubrobacter{genus}(100);Unassigned{species}(0)	Bacteria	Actinobacteria	Actinobacteria	Solirubrobacterales	Solirubrobacteraceae	Solirubrobacter	Unassigned
ASV169	40	137	139	0	180	68	214	196	423	667	280	104	0	0	0	0	0	2448	Bacteria{superkingdom}(100);Bacteroidetes{phylum}(100);Cytophagia{class}(100);Cytophagales{order}(100);Cytophagaceae{family}(100);Adhaeribacter{genus}(100);Unassigned{species}(0)	Bacteria	Bacteroidetes	Cytophagia	Cytophagales	Cytophagaceae	Adhaeribacter	Unassigned
ASV170	100	0	47	0	0	41	1005	0	882	0	841	234	490	42	0	0	466	4148	Bacteria{superkingdom}(100);Acidobacteria{phylum}(100);Acidobacteria_Gp10{class}(100);{order}(100);{family}(100);Gp10{genus}(100);Unassigned{species}(0)	Bacteria	Acidobacteria	Acidobacteria_Gp10			Gp10	Unassigned
ASV171	207	0	157	298	558	182	16	0	0	0	0	0	111	0	27	0	76	1632	Bacteria{superkingdom}(100);Chloroflexi{phylum}(100);Thermomicrobia{class}(100);Unassigned{order}(0);Unassigned{family}(0);Unassigned{genus}(0);Unassigned{species}(0)	Bacteria	Chloroflexi	Thermomicrobia	Unassigned	Unassigned	Unassigned	Unassigned
ASV172	0	0	0	0	0	0	0	0	0	0	17	274	30	0	11	0	0	332	Bacteria{superkingdom}(81);Proteobacteria{phylum}(81);Betaproteobacteria{class}(81);Burkholderiales{order}(81);Oxalobacteraceae{family}(81);Massilia{genus}(81);Massilia_dura{species}(81)	Bacteria	Proteobacteria	Betaproteobacteria	Burkholderiales	Oxalobacteraceae	Massilia	Massilia_dura
ASV173	29	0	31	36	107	86	0	0	0	0	21	0	76	0	0	0	21	407	Bacteria{superkingdom}(97);Bacteroidetes{phylum}(97);Cytophagia{class}(97);Cytophagales{order}(97);{family}(97);Chryseolinea{genus}(97);uncultured_Bacteroidetes_bacterium{species}(97)	Bacteria	Bacteroidetes	Cytophagia	Cytophagales		Chryseolinea	uncultured_Bacteroidetes_bacterium
ASV174	26	207	0	0	20	0	0	0	162	474	0	0	0	8	0	0	0	897	Bacteria{superkingdom}(100);Unassigned{phylum}(0);Unassigned{class}(0);Unassigned{order}(0);Unassigned{family}(0);Unassigned{genus}(0);Unassigned{species}(0)	Bacteria	Unassigned	Unassigned	Unassigned	Unassigned	Unassigned	Unassigned
ASV175	0	0	0	132	0	138	0	0	0	0	50	9	0	36	23	146	0	534	Bacteria{superkingdom}(100);Actinobacteria{phylum}(100);Actinobacteria{class}(100);Actinomycetales{order}(100);Pseudonocardiaceae{family}(100);Amycolatopsis{genus}(100);Unassigned{species}(0)	Bacteria	Actinobacteria	Actinobacteria	Actinomycetales	Pseudonocardiaceae	Amycolatopsis	Unassigned
ASV177	137	0	220	130	374	124	61	54	43	0	78	96	57	211	37	106	98	1826	Bacteria{superkingdom}(100);Actinobacteria{phylum}(100);Actinobacteria{class}(100);Unassigned{order}(0);Unassigned{family}(0);Unassigned{genus}(0);Unassigned{species}(0)	Bacteria	Actinobacteria	Actinobacteria	Unassigned	Unassigned	Unassigned	Unassigned
ASV178	0	0	0	0	0	1853	0	0	0	0	0	0	0	0	0	0	0	1853	Bacteria{superkingdom}(98);Actinobacteria{phylum}(98);Actinobacteria{class}(98);Actinomycetales{order}(98);Streptomycetaceae{family}(98);Streptomyces{genus}(98);Unassigned{species}(0)	Bacteria	Actinobacteria	Actinobacteria	Actinomycetales	Streptomycetaceae	Streptomyces	Unassigned
ASV179	119	375	103	72	82	78	274	210	206	87	38	57	30	20	38	0	30	1819	Bacteria{superkingdom}(100);Proteobacteria{phylum}(100);Alphaproteobacteria{class}(100);Rhizobiales{order}(100);Rhodobiaceae{family}(100);{genus}(100);uncultured_soil_bacterium{species}(100)	Bacteria	Proteobacteria	Alphaproteobacteria	Rhizobiales	Rhodobiaceae		uncultured_soil_bacterium
ASV180	135	176	149	124	109	55	202	257	230	32	110	83	56	113	43	105	155	2134	Bacteria{superkingdom}(100);Planctomycetes{phylum}(100);Planctomycetia{class}(100);Planctomycetales{order}(100);Planctomycetaceae{family}(100);Pirellula{genus}(100);Unassigned{species}(0)	Bacteria	Planctomycetes	Planctomycetia	Planctomycetales	Planctomycetaceae	Pirellula	Unassigned
ASV181	0	0	41	52	80	0	486	40	55	59	223	300	233	472	0	0	0	2041	Bacteria{superkingdom}(100);Actinobacteria{phylum}(100);Actinobacteria{class}(100);{order}(100);{family}(100);{genus}(100);uncultured_Actinomycetales_bacterium{species}(100)	Bacteria	Actinobacteria	Actinobacteria				uncultured_Actinomycetales_bacterium
ASV182	112	33	149	12	132	430	13	0	0	0	0	0	0	46	0	64	0	991	Bacteria{superkingdom}(100);Bacteroidetes{phylum}(100);Sphingobacteriia{class}(100);Sphingobacteriales{order}(100);Chitinophagaceae{family}(100);Flavitalea{genus}(100);Unassigned{species}(0)	Bacteria	Bacteroidetes	Sphingobacteriia	Sphingobacteriales	Chitinophagaceae	Flavitalea	Unassigned
ASV183	0	0	0	26	0	0	0	0	0	40	0	0	0	46	0	55	0	167	Bacteria{superkingdom}(96);Proteobacteria{phylum}(96);Gammaproteobacteria{class}(96);{order}(96);{family}(96);{genus}(96);uncultured_Steroidobacter_sp.{species}(96)	Bacteria	Proteobacteria	Gammaproteobacteria				uncultured_Steroidobacter_sp.
ASV184	117	21	65	41	60	82	90	17	79	48	21	9	55	0	0	49	14	768	Bacteria{superkingdom}(85);{phylum}(85);{class}(85);{order}(85);{family}(85);{genus}(85);uncultured_Syntrophobacter_sp.{species}(85)	Bacteria						uncultured_Syntrophobacter_sp.
ASV185	179	52	45	0	732	162	0	11	0	0	0	0	0	0	0	0	0	1181	Bacteria{superkingdom}(100);Bacteroidetes{phylum}(100);Cytophagia{class}(100);Cytophagales{order}(100);{family}(100);Ohtaekwangia{genus}(100);Unassigned{species}(0)	Bacteria	Bacteroidetes	Cytophagia	Cytophagales		Ohtaekwangia	Unassigned
ASV186	0	0	0	0	0	0	0	0	18	0	0	61	0	28	15	103	0	225	Bacteria{superkingdom}(81);Bacteroidetes{phylum}(81);Sphingobacteriia{class}(81);Sphingobacteriales{order}(81);Chitinophagaceae{family}(81);Flavisolibacter{genus}(81);Unassigned{species}(0)	Bacteria	Bacteroidetes	Sphingobacteriia	Sphingobacteriales	Chitinophagaceae	Flavisolibacter	Unassigned
ASV187	0	0	0	0	0	0	0	0	0	0	0	0	0	0	96	0	0	96	Bacteria{superkingdom}(100);Proteobacteria{phylum}(100);Gammaproteobacteria{class}(100);Enterobacteriales{order}(100);Enterobacteriaceae{family}(100);Unassigned{genus}(0);Unassigned{species}(0)	Bacteria	Proteobacteria	Gammaproteobacteria	Enterobacteriales	Enterobacteriaceae	Unassigned	Unassigned
ASV188	17	0	0	40	0	0	0	0	41	99	110	140	0	439	224	506	12	1628	Bacteria{superkingdom}(88);Actinobacteria{phylum}(88);Actinobacteria{class}(88);Actinomycetales{order}(88);Pseudonocardiaceae{family}(88);Actinomycetospora{genus}(88);uncultured_bacterium{species}(88)	Bacteria	Actinobacteria	Actinobacteria	Actinomycetales	Pseudonocardiaceae	Actinomycetospora	uncultured_bacterium
ASV189	111	67	55	13	30	68	97	16	35	28	11	24	0	0	0	0	0	555	Bacteria{superkingdom}(100);Proteobacteria{phylum}(100);Alphaproteobacteria{class}(100);Unassigned{order}(0);Unassigned{family}(0);Unassigned{genus}(0);Unassigned{species}(0)	Bacteria	Proteobacteria	Alphaproteobacteria	Unassigned	Unassigned	Unassigned	Unassigned
ASV190	73	19	169	269	173	203	13	0	0	0	0	0	0	0	0	13	13	945	Bacteria{superkingdom}(100);Proteobacteria{phylum}(100);Alphaproteobacteria{class}(100);Rhizobiales{order}(100);Hyphomicrobiaceae{family}(100);Devosia{genus}(100);Unassigned{species}(0)	Bacteria	Proteobacteria	Alphaproteobacteria	Rhizobiales	Hyphomicrobiaceae	Devosia	Unassigned
ASV191	211	4	154	0	9	785	1	0	0	0	0	0	0	0	0	0	0	1164	Bacteria{superkingdom}(100);Acidobacteria{phylum}(100);Acidobacteria_Gp4{class}(100);{order}(100);{family}(100);Gp4{genus}(100);Unassigned{species}(0)	Bacteria	Acidobacteria	Acidobacteria_Gp4			Gp4	Unassigned
ASV192	76	131	15	0	58	179	12	11	0	0	0	0	32	21	0	28	48	611	Bacteria{superkingdom}(94);Proteobacteria{phylum}(94);Alphaproteobacteria{class}(94);Rhizobiales{order}(94);Rhodobiaceae{family}(94);{genus}(94);Nordella_oligomobilis{species}(94)	Bacteria	Proteobacteria	Alphaproteobacteria	Rhizobiales	Rhodobiaceae		Nordella_oligomobilis
ASV193	50	0	135	135	95	26	41	0	12	0	0	0	0	0	0	7	0	501	Bacteria{superkingdom}(100);Bacteroidetes{phylum}(100);Sphingobacteriia{class}(100);Sphingobacteriales{order}(100);Chitinophagaceae{family}(100);Unassigned{genus}(0);Unassigned{species}(0)	Bacteria	Bacteroidetes	Sphingobacteriia	Sphingobacteriales	Chitinophagaceae	Unassigned	Unassigned
ASV194	79	19	38	216	156	359	0	0	12	0	11	0	11	0	0	33	11	945	Bacteria{superkingdom}(100);Proteobacteria{phylum}(100);Gammaproteobacteria{class}(100);Xanthomonadales{order}(100);Sinobacteraceae{family}(100);Unassigned{genus}(0);Unassigned{species}(0)	Bacteria	Proteobacteria	Gammaproteobacteria	Xanthomonadales	Sinobacteraceae	Unassigned	Unassigned
ASV195	51	96	108	64	62	90	74	67	128	215	127	264	0	117	375	79	113	2030	Bacteria{superkingdom}(99);Chloroflexi{phylum}(99);Anaerolineae{class}(99);Anaerolineales{order}(99);Anaerolineaceae{family}(99);{genus}(99);uncultured_soil_bacterium{species}(99)	Bacteria	Chloroflexi	Anaerolineae	Anaerolineales	Anaerolineaceae		uncultured_soil_bacterium
ASV196	208	0	155	480	318	63	685	0	0	43	210	502	38	0	0	0	0	2702	Bacteria{superkingdom}(90);Firmicutes{phylum}(90);Bacilli{class}(90);Bacillales{order}(90);Bacillaceae_1{family}(90);Bacillus{genus}(90);Unassigned{species}(0)	Bacteria	Firmicutes	Bacilli	Bacillales	Bacillaceae_1	Bacillus	Unassigned
ASV197	0	0	0	162	0	0	0	0	0	84	0	54	0	137	0	446	0	883	Bacteria{superkingdom}(100);Actinobacteria{phylum}(100);Actinobacteria{class}(100);Actinomycetales{order}(100);Nocardioidaceae{family}(100);Kribbella{genus}(100);Unassigned{species}(0)	Bacteria	Actinobacteria	Actinobacteria	Actinomycetales	Nocardioidaceae	Kribbella	Unassigned
ASV198	0	20	0	0	0	0	2	0	0	0	0	0	0	0	0	0	0	22	Bacteria{superkingdom}(100);Bacteroidetes{phylum}(100);Unassigned{class}(0);Unassigned{order}(0);Unassigned{family}(0);Unassigned{genus}(0);Unassigned{species}(0)	Bacteria	Bacteroidetes	Unassigned	Unassigned	Unassigned	Unassigned	Unassigned
ASV199	105	53	20	0	51	125	0	21	12	31	18	42	0	66	82	57	0	683	Bacteria{superkingdom}(100);Proteobacteria{phylum}(100);Gammaproteobacteria{class}(100);{order}(100);{family}(100);{genus}(100);Unassigned{species}(0)	Bacteria	Proteobacteria	Gammaproteobacteria				Unassigned
ASV200	252	0	618	0	55	107	95	6	7	0	0	0	0	0	0	0	0	1140	Bacteria{superkingdom}(91);{phylum}(91);{class}(91);{order}(91);{family}(91);{genus}(91);uncultured_Micromonospora_sp.{species}(91)	Bacteria						uncultured_Micromonospora_sp.
ASV201	34	15	205	13	49	0	304	296	336	499	72	727	823	335	397	146	750	5001	Bacteria{superkingdom}(100);Proteobacteria{phylum}(100);Alphaproteobacteria{class}(100);Rhodobacterales{order}(100);Rhodobacteraceae{family}(100);Rubellimicrobium{genus}(100);Unassigned{species}(0)	Bacteria	Proteobacteria	Alphaproteobacteria	Rhodobacterales	Rhodobacteraceae	Rubellimicrobium	Unassigned
ASV202	0	0	0	287	0	0	0	34	127	167	39	462	84	508	564	738	235	3245	Bacteria{superkingdom}(97);Proteobacteria{phylum}(97);Alphaproteobacteria{class}(97);Rhizobiales{order}(97);Methylobacteriaceae{family}(97);Microvirga{genus}(97);Unassigned{species}(0)	Bacteria	Proteobacteria	Alphaproteobacteria	Rhizobiales	Methylobacteriaceae	Microvirga	Unassigned
ASV203	221	38	255	45	223	142	148	0	38	0	0	0	0	0	0	0	0	1110	Bacteria{superkingdom}(87);Proteobacteria{phylum}(87);Deltaproteobacteria{class}(87);{order}(87);{family}(87);{genus}(87);uncultured_Acidobacteriales_bacterium{species}(87)	Bacteria	Proteobacteria	Deltaproteobacteria				uncultured_Acidobacteriales_bacterium
ASV204	166	304	222	72	41	68	629	367	238	94	82	139	106	54	0	0	160	2742	Bacteria{superkingdom}(95);Proteobacteria{phylum}(95);Betaproteobacteria{class}(95);{order}(95);{family}(95);{genus}(95);Unassigned{species}(0)	Bacteria	Proteobacteria	Betaproteobacteria				Unassigned
ASV205	148	75	177	113	68	125	178	154	112	130	61	114	93	41	116	166	124	1995	Bacteria{superkingdom}(89);Actinobacteria{phylum}(89);Actinobacteria{class}(89);Acidimicrobiales{order}(89);Acidimicrobineae_incertae_sedis{family}(89);Aciditerrimonas{genus}(89);uncultured_Acidimicrobiales_bacterium{species}(89)	Bacteria	Actinobacteria	Actinobacteria	Acidimicrobiales	Acidimicrobineae_incertae_sedis	Aciditerrimonas	uncultured_Acidimicrobiales_bacterium
ASV207	93	0	85	104	222	185	35	27	76	18	0	0	39	34	0	0	66	984	Bacteria{superkingdom}(97);Proteobacteria{phylum}(97);Alphaproteobacteria{class}(97);Rhizobiales{order}(97);Hyphomicrobiaceae{family}(97);Hyphomicrobium{genus}(97);Unassigned{species}(0)	Bacteria	Proteobacteria	Alphaproteobacteria	Rhizobiales	Hyphomicrobiaceae	Hyphomicrobium	Unassigned
ASV208	264	0	198	229	392	0	0	0	34	0	24	0	29	24	0	0	60	1254	Bacteria{superkingdom}(96);Proteobacteria{phylum}(96);Alphaproteobacteria{class}(96);Rhizobiales{order}(96);Rhizobiaceae{family}(96);Rhizobium{genus}(96);Unassigned{species}(0)	Bacteria	Proteobacteria	Alphaproteobacteria	Rhizobiales	Rhizobiaceae	Rhizobium	Unassigned
ASV209	0	26	13	62	59	34	0	0	0	5	0	0	0	0	0	0	0	199	Bacteria{superkingdom}(88);Bacteroidetes{phylum}(88);Cytophagia{class}(88);Cytophagales{order}(88);{family}(88);Chryseolinea{genus}(88);Unassigned{species}(0)	Bacteria	Bacteroidetes	Cytophagia	Cytophagales		Chryseolinea	Unassigned
ASV210	63	131	59	43	36	59	101	92	135	97	56	87	87	159	83	64	98	1450	Bacteria{superkingdom}(100);Unassigned{phylum}(0);Unassigned{class}(0);Unassigned{order}(0);Unassigned{family}(0);Unassigned{genus}(0);Unassigned{species}(0)	Bacteria	Unassigned	Unassigned	Unassigned	Unassigned	Unassigned	Unassigned
ASV211	102	44	82	50	48	55	158	561	132	176	79	166	97	311	45	184	243	2533	Bacteria{superkingdom}(83);Proteobacteria{phylum}(83);Betaproteobacteria{class}(83);{order}(83);{family}(83);{genus}(83);bacterium_Ellin6067{species}(83)	Bacteria	Proteobacteria	Betaproteobacteria				bacterium_Ellin6067
ASV212	62	13	45	144	19	22	35	73	189	640	33	104	0	16	10	24	0	1429	Bacteria{superkingdom}(100);Proteobacteria{phylum}(100);Gammaproteobacteria{class}(100);Unassigned{order}(0);Unassigned{family}(0);Unassigned{genus}(0);Unassigned{species}(0)	Bacteria	Proteobacteria	Gammaproteobacteria	Unassigned	Unassigned	Unassigned	Unassigned
ASV213	0	0	0	22	0	0	0	0	0	0	58	77	0	2043	518	98	0	2816	Bacteria{superkingdom}(80);Actinobacteria{phylum}(80);Actinobacteria{class}(80);Actinomycetales{order}(80);Pseudonocardiaceae{family}(80);Actinophytocola{genus}(80);uncultured_bacterium{species}(80)	Bacteria	Actinobacteria	Actinobacteria	Actinomycetales	Pseudonocardiaceae	Actinophytocola	uncultured_bacterium
ASV214	106	0	274	119	258	339	28	0	0	0	0	0	34	0	0	0	0	1158	Bacteria{superkingdom}(94);Chloroflexi{phylum}(94);Thermomicrobia{class}(94);Sphaerobacterales{order}(94);Sphaerobacteraceae{family}(94);{genus}(94);Unassigned{species}(0)	Bacteria	Chloroflexi	Thermomicrobia	Sphaerobacterales	Sphaerobacteraceae		Unassigned
ASV215	106	0	237	38	73	0	103	0	0	55	39	64	0	0	0	353	0	1068	Bacteria{superkingdom}(80);Proteobacteria{phylum}(80);Deltaproteobacteria{class}(80);Myxococcales{order}(80);Cystobacteraceae{family}(80);Unassigned{genus}(0);Unassigned{species}(0)	Bacteria	Proteobacteria	Deltaproteobacteria	Myxococcales	Cystobacteraceae	Unassigned	Unassigned
ASV216	77	228	184	189	47	98	276	236	146	273	75	292	238	413	35	68	122	2997	Bacteria{superkingdom}(100);Actinobacteria{phylum}(100);Actinobacteria{class}(100);Solirubrobacterales{order}(100);Unassigned{family}(0);Unassigned{genus}(0);Unassigned{species}(0)	Bacteria	Actinobacteria	Actinobacteria	Solirubrobacterales	Unassigned	Unassigned	Unassigned
ASV217	0	0	0	0	98	72	136	0	76	28	0	0	0	0	0	0	0	410	Bacteria{superkingdom}(100);Acidobacteria{phylum}(100);Acidobacteria_Gp4{class}(100);{order}(100);{family}(100);Gp4{genus}(100);Unassigned{species}(0)	Bacteria	Acidobacteria	Acidobacteria_Gp4			Gp4	Unassigned
ASV218	0	0	0	0	134	141	0	0	0	0	0	0	48	0	0	0	0	323	Bacteria{superkingdom}(88);Bacteroidetes{phylum}(88);Cytophagia{class}(88);Cytophagales{order}(88);{family}(88);Ohtaekwangia{genus}(88);uncultured_Bacteroidetes_bacterium{species}(88)	Bacteria	Bacteroidetes	Cytophagia	Cytophagales		Ohtaekwangia	uncultured_Bacteroidetes_bacterium
ASV219	141	83	216	117	106	50	307	261	715	55	79	120	0	0	194	18	80	2542	Bacteria{superkingdom}(97);Chloroflexi{phylum}(97);Anaerolineae{class}(97);Anaerolineales{order}(97);Anaerolineaceae{family}(97);{genus}(97);uncultured_soil_bacterium{species}(97)	Bacteria	Chloroflexi	Anaerolineae	Anaerolineales	Anaerolineaceae		uncultured_soil_bacterium
ASV220	0	45	0	0	0	0	0	0	0	53	0	39	0	0	0	0	67	204	Bacteria{superkingdom}(86);Proteobacteria{phylum}(86);Betaproteobacteria{class}(86);{order}(86);{family}(86);{genus}(86);Unassigned{species}(0)	Bacteria	Proteobacteria	Betaproteobacteria				Unassigned
ASV221	68	214	86	30	31	34	97	75	97	137	109	235	47	145	167	557	311	2440	Bacteria{superkingdom}(100);Actinobacteria{phylum}(100);Actinobacteria{class}(100);Actinomycetales{order}(100);Geodermatophilaceae{family}(100);Blastococcus{genus}(100);Unassigned{species}(0)	Bacteria	Actinobacteria	Actinobacteria	Actinomycetales	Geodermatophilaceae	Blastococcus	Unassigned
ASV222	623	77	771	0	156	163	0	0	0	0	0	0	0	0	0	0	0	1790	Bacteria{superkingdom}(99);Chloroflexi{phylum}(99);{class}(99);{order}(99);{family}(99);{genus}(99);uncultured_Anaerolineae_bacterium{species}(99)	Bacteria	Chloroflexi					uncultured_Anaerolineae_bacterium
ASV224	18	12	8	55	71	443	45	0	0	11	0	7	0	21	0	21	0	712	Bacteria{superkingdom}(84);Actinobacteria{phylum}(84);Actinobacteria{class}(84);Actinomycetales{order}(84);Pseudonocardiaceae{family}(84);Actinophytocola{genus}(84);uncultured_bacterium{species}(84)	Bacteria	Actinobacteria	Actinobacteria	Actinomycetales	Pseudonocardiaceae	Actinophytocola	uncultured_bacterium
ASV225	157	37	148	26	153	68	102	56	77	94	170	101	299	0	0	0	65	1553	Bacteria{superkingdom}(97);Firmicutes{phylum}(97);Bacilli{class}(97);Bacillales{order}(97);Bacillaceae_1{family}(97);Bacillus{genus}(97);Unassigned{species}(0)	Bacteria	Firmicutes	Bacilli	Bacillales	Bacillaceae_1	Bacillus	Unassigned
ASV226	108	0	97	60	170	160	315	320	432	416	81	152	176	99	0	160	153	2899	Bacteria{superkingdom}(100);Nitrospirae{phylum}(100);Nitrospira{class}(100);Nitrospirales{order}(100);Nitrospiraceae{family}(100);Nitrospira{genus}(100);Unassigned{species}(0)	Bacteria	Nitrospirae	Nitrospira	Nitrospirales	Nitrospiraceae	Nitrospira	Unassigned
ASV227	0	287	0	22	0	0	193	108	55	46	159	173	116	574	510	408	158	2809	Bacteria{superkingdom}(94);Actinobacteria{phylum}(94);Actinobacteria{class}(94);Acidimicrobiales{order}(94);{family}(94);{genus}(94);uncultured_Thermobifida_sp.{species}(94)	Bacteria	Actinobacteria	Actinobacteria	Acidimicrobiales			uncultured_Thermobifida_sp.
ASV228	211	49	102	102	201	416	20	0	18	33	17	25	16	21	12	8	78	1329	Bacteria{superkingdom}(98);Actinobacteria{phylum}(98);Actinobacteria{class}(98);Actinomycetales{order}(98);Nocardioidaceae{family}(98);Aeromicrobium{genus}(98);Unassigned{species}(0)	Bacteria	Actinobacteria	Actinobacteria	Actinomycetales	Nocardioidaceae	Aeromicrobium	Unassigned
ASV229	209	27	82	57	472	159	31	93	16	0	50	47	124	33	199	0	80	1679	Bacteria{superkingdom}(100);Acidobacteria{phylum}(100);Acidobacteria_Gp6{class}(100);{order}(100);{family}(100);Gp6{genus}(100);Unassigned{species}(0)	Bacteria	Acidobacteria	Acidobacteria_Gp6			Gp6	Unassigned
ASV230	66	19	15	162	0	13	0	0	0	0	0	0	54	0	0	252	11	592	Bacteria{superkingdom}(100);Acidobacteria{phylum}(100);Acidobacteria_Gp10{class}(100);{order}(100);{family}(100);Gp10{genus}(100);Unassigned{species}(0)	Bacteria	Acidobacteria	Acidobacteria_Gp10			Gp10	Unassigned
ASV231	0	0	20	0	82	49	0	19	0	8	0	19	0	35	23	57	0	312	Bacteria{superkingdom}(100);Proteobacteria{phylum}(100);Gammaproteobacteria{class}(100);Xanthomonadales{order}(100);Sinobacteraceae{family}(100);Steroidobacter{genus}(100);Unassigned{species}(0)	Bacteria	Proteobacteria	Gammaproteobacteria	Xanthomonadales	Sinobacteraceae	Steroidobacter	Unassigned
ASV232	147	120	199	122	285	102	69	224	171	96	40	56	195	37	0	49	56	1968	Bacteria{superkingdom}(100);Chloroflexi{phylum}(100);Chloroflexia{class}(100);Kallotenuales{order}(100);Kallotenuaceae{family}(100);Kallotenue{genus}(100);uncultured_bacterium{species}(100)	Bacteria	Chloroflexi	Chloroflexia	Kallotenuales	Kallotenuaceae	Kallotenue	uncultured_bacterium
ASV233	60	258	78	72	52	0	381	219	126	117	77	250	79	0	38	80	0	1887	Bacteria{superkingdom}(100);Actinobacteria{phylum}(100);Actinobacteria{class}(100);Acidimicrobiales{order}(100);Unassigned{family}(0);Unassigned{genus}(0);Unassigned{species}(0)	Bacteria	Actinobacteria	Actinobacteria	Acidimicrobiales	Unassigned	Unassigned	Unassigned
ASV234	46	320	563	123	1155	0	1294	0	0	53	0	0	0	3	25	0	30	3612	Bacteria{superkingdom}(86);Acidobacteria{phylum}(86);Acidobacteria_Gp10{class}(86);{order}(86);{family}(86);Gp10{genus}(86);uncultured_soil_bacterium{species}(86)	Bacteria	Acidobacteria	Acidobacteria_Gp10			Gp10	uncultured_soil_bacterium
ASV235	63	0	0	0	0	0	0	0	0	0	0	190	0	24	0	21	0	298	Bacteria{superkingdom}(94);Bacteroidetes{phylum}(94);Cytophagia{class}(94);Cytophagales{order}(94);{family}(94);Chryseolinea{genus}(94);Unassigned{species}(0)	Bacteria	Bacteroidetes	Cytophagia	Cytophagales		Chryseolinea	Unassigned
ASV236	0	0	0	63	0	209	0	0	80	81	0	0	0	29	0	44	0	506	Bacteria{superkingdom}(100);Bacteroidetes{phylum}(100);Sphingobacteriia{class}(100);Sphingobacteriales{order}(100);Chitinophagaceae{family}(100);Chitinophaga{genus}(100);Unassigned{species}(0)	Bacteria	Bacteroidetes	Sphingobacteriia	Sphingobacteriales	Chitinophagaceae	Chitinophaga	Unassigned
ASV237	129	52	176	29	74	78	23	26	27	43	0	81	9	34	132	95	48	1056	Bacteria{superkingdom}(100);Proteobacteria{phylum}(100);Alphaproteobacteria{class}(100);Rhizobiales{order}(100);Methylobacteriaceae{family}(100);Microvirga{genus}(100);Unassigned{species}(0)	Bacteria	Proteobacteria	Alphaproteobacteria	Rhizobiales	Methylobacteriaceae	Microvirga	Unassigned
ASV238	47	0	15	102	66	321	0	0	0	0	0	0	8	0	0	5	0	564	Bacteria{superkingdom}(84);Acidobacteria{phylum}(84);Acidobacteria_Gp3{class}(84);{order}(84);{family}(84);Gp3{genus}(84);Unassigned{species}(0)	Bacteria	Acidobacteria	Acidobacteria_Gp3			Gp3	Unassigned
ASV239	77	474	42	134	71	62	60	202	204	228	80	91	544	606	0	264	354	3493	Bacteria{superkingdom}(100);Chloroflexi{phylum}(100);Anaerolineae{class}(100);Anaerolineales{order}(100);Anaerolineaceae{family}(100);{genus}(100);uncultured_soil_bacterium{species}(100)	Bacteria	Chloroflexi	Anaerolineae	Anaerolineales	Anaerolineaceae		uncultured_soil_bacterium
ASV240	110	0	79	161	68	66	111	135	115	103	117	294	68	116	163	105	632	2443	Bacteria{superkingdom}(93);Proteobacteria{phylum}(93);Betaproteobacteria{class}(93);Burkholderiales{order}(93);Comamonadaceae{family}(93);Ramlibacter{genus}(93);Unassigned{species}(0)	Bacteria	Proteobacteria	Betaproteobacteria	Burkholderiales	Comamonadaceae	Ramlibacter	Unassigned
ASV241	105	0	16	462	50	40	93	179	0	256	61	61	355	0	0	0	0	1678	Bacteria{superkingdom}(93);Firmicutes{phylum}(93);Bacilli{class}(93);Bacillales{order}(93);Bacillaceae_1{family}(93);Domibacillus{genus}(93);uncultured_bacterium{species}(93)	Bacteria	Firmicutes	Bacilli	Bacillales	Bacillaceae_1	Domibacillus	uncultured_bacterium
ASV242	0	453	45	122	111	686	32	0	8	130	0	0	0	0	29	189	71	1876	Bacteria{superkingdom}(100);Acidobacteria{phylum}(100);Acidobacteria_Gp7{class}(100);{order}(100);{family}(100);Gp7{genus}(100);Unassigned{species}(0)	Bacteria	Acidobacteria	Acidobacteria_Gp7			Gp7	Unassigned
ASV243	118	0	154	184	113	134	57	0	59	0	0	0	44	0	0	0	0	863	Bacteria{superkingdom}(99);Firmicutes{phylum}(99);Bacilli{class}(99);Bacillales{order}(99);Paenibacillaceae_1{family}(99);Paenibacillus{genus}(99);Unassigned{species}(0)	Bacteria	Firmicutes	Bacilli	Bacillales	Paenibacillaceae_1	Paenibacillus	Unassigned
ASV244	101	50	78	50	88	72	91	99	85	72	70	97	242	99	198	71	116	1679	Bacteria{superkingdom}(100);Proteobacteria{phylum}(100);Alphaproteobacteria{class}(100);Rhizobiales{order}(100);Hyphomicrobiaceae{family}(100);Unassigned{genus}(0);Unassigned{species}(0)	Bacteria	Proteobacteria	Alphaproteobacteria	Rhizobiales	Hyphomicrobiaceae	Unassigned	Unassigned
ASV245	60	35	298	28	589	56	40	0	19	0	0	0	0	0	0	0	0	1125	Bacteria{superkingdom}(100);Bacteroidetes{phylum}(100);Sphingobacteriia{class}(100);Sphingobacteriales{order}(100);Chitinophagaceae{family}(100);Unassigned{genus}(0);Unassigned{species}(0)	Bacteria	Bacteroidetes	Sphingobacteriia	Sphingobacteriales	Chitinophagaceae	Unassigned	Unassigned
ASV246	0	18	0	0	0	0	0	0	61	32	0	0	0	0	0	0	0	111	Bacteria{superkingdom}(98);Acidobacteria{phylum}(98);Acidobacteria_Gp4{class}(98);{order}(98);{family}(98);Gp4{genus}(98);uncultured_actinobacterium{species}(98)	Bacteria	Acidobacteria	Acidobacteria_Gp4			Gp4	uncultured_actinobacterium
ASV247	78	0	27	75	51	37	74	212	198	261	102	159	320	355	50	151	153	2303	Bacteria{superkingdom}(85);Proteobacteria{phylum}(85);Deltaproteobacteria{class}(85);{order}(85);{family}(85);{genus}(85);Alteromonas_sp._Gp-3-7.1{species}(85)	Bacteria	Proteobacteria	Deltaproteobacteria				Alteromonas_sp._Gp-3-7.1
ASV248	39	187	0	53	13	165	0	0	0	0	0	0	24	0	0	0	0	481	Bacteria{superkingdom}(100);Bacteroidetes{phylum}(100);Flavobacteriia{class}(100);Flavobacteriales{order}(100);Flavobacteriaceae{family}(100);Flavobacterium{genus}(100);Unassigned{species}(0)	Bacteria	Bacteroidetes	Flavobacteriia	Flavobacteriales	Flavobacteriaceae	Flavobacterium	Unassigned
ASV249	382	29	106	80	75	24	174	289	355	176	19	151	0	0	0	0	25	1885	Bacteria{superkingdom}(100);Chloroflexi{phylum}(100);Chloroflexia{class}(100);{order}(100);{family}(100);{genus}(100);uncultured_bacterium{species}(100)	Bacteria	Chloroflexi	Chloroflexia				uncultured_bacterium
ASV250	95	22	246	126	135	107	13	21	0	53	0	0	0	0	0	0	0	818	Bacteria{superkingdom}(82);Proteobacteria{phylum}(82);Gammaproteobacteria{class}(82);Xanthomonadales{order}(82);{family}(82);{genus}(82);uncultured_Pseudomonadales_bacterium{species}(82)	Bacteria	Proteobacteria	Gammaproteobacteria	Xanthomonadales			uncultured_Pseudomonadales_bacterium
ASV251	57	258	35	151	45	44	0	0	0	98	0	66	38	34	62	50	0	938	Bacteria{superkingdom}(90);Bacteroidetes{phylum}(90);Cytophagia{class}(90);Cytophagales{order}(90);{family}(90);Ohtaekwangia{genus}(90);uncultured_Sphingobacteriales_bacterium{species}(90)	Bacteria	Bacteroidetes	Cytophagia	Cytophagales		Ohtaekwangia	uncultured_Sphingobacteriales_bacterium
ASV252	16	0	62	31	31	101	90	27	82	11	0	38	0	0	0	0	0	489	Bacteria{superkingdom}(99);Chloroflexi{phylum}(99);{class}(99);{order}(99);{family}(99);{genus}(99);Unassigned{species}(0)	Bacteria	Chloroflexi					Unassigned
ASV253	68	0	51	136	98	201	0	0	0	0	0	0	79	0	0	0	46	679	Bacteria{superkingdom}(100);Proteobacteria{phylum}(100);Alphaproteobacteria{class}(100);Rhodospirillales{order}(100);{family}(100);Reyranella{genus}(100);Unassigned{species}(0)	Bacteria	Proteobacteria	Alphaproteobacteria	Rhodospirillales		Reyranella	Unassigned
ASV254	205	0	92	488	342	143	0	24	82	31	0	56	42	51	83	55	107	1801	Bacteria{superkingdom}(100);Proteobacteria{phylum}(100);Alphaproteobacteria{class}(100);Rhizobiales{order}(100);Bradyrhizobiaceae{family}(100);Bosea{genus}(100);Unassigned{species}(0)	Bacteria	Proteobacteria	Alphaproteobacteria	Rhizobiales	Bradyrhizobiaceae	Bosea	Unassigned
ASV255	41	0	0	0	0	190	0	23	8	48	0	29	15	33	45	0	10	442	Bacteria{superkingdom}(100);Proteobacteria{phylum}(100);Gammaproteobacteria{class}(100);Xanthomonadales{order}(100);Sinobacteraceae{family}(100);Unassigned{genus}(0);Unassigned{species}(0)	Bacteria	Proteobacteria	Gammaproteobacteria	Xanthomonadales	Sinobacteraceae	Unassigned	Unassigned
ASV256	114	0	114	156	139	179	0	0	0	91	0	77	120	57	97	52	61	1257	Bacteria{superkingdom}(100);Proteobacteria{phylum}(100);Alphaproteobacteria{class}(100);Rhizobiales{order}(100);Methylobacteriaceae{family}(100);Microvirga{genus}(100);Unassigned{species}(0)	Bacteria	Proteobacteria	Alphaproteobacteria	Rhizobiales	Methylobacteriaceae	Microvirga	Unassigned
ASV257	0	0	152	79	63	0	0	0	0	15	0	0	3084	113	0	271	0	3777	Bacteria{superkingdom}(100);Acidobacteria{phylum}(100);Acidobacteria_Gp7{class}(100);{order}(100);{family}(100);Gp7{genus}(100);Unassigned{species}(0)	Bacteria	Acidobacteria	Acidobacteria_Gp7			Gp7	Unassigned
ASV259	61	15	138	7	13	60	0	0	0	0	0	0	3	8	0	0	30	335	Bacteria{superkingdom}(100);Acidobacteria{phylum}(100);Acidobacteria_Gp10{class}(100);{order}(100);{family}(100);Gp10{genus}(100);Unassigned{species}(0)	Bacteria	Acidobacteria	Acidobacteria_Gp10			Gp10	Unassigned
ASV260	38	256	10	0	75	60	51	0	0	0	0	0	0	0	0	0	0	490	Bacteria{superkingdom}(90);Acidobacteria{phylum}(90);Acidobacteria_Gp4{class}(90);{order}(90);{family}(90);Gp4{genus}(90);uncultured_Rhodopseudomonas_sp.{species}(90)	Bacteria	Acidobacteria	Acidobacteria_Gp4			Gp4	uncultured_Rhodopseudomonas_sp.
ASV261	50	11	59	61	333	220	28	0	0	23	0	0	0	0	0	0	10	795	Bacteria{superkingdom}(100);Chloroflexi{phylum}(100);Chloroflexia{class}(100);Chloroflexales{order}(100);{family}(100);{genus}(100);uncultured_soil_bacterium{species}(100)	Bacteria	Chloroflexi	Chloroflexia	Chloroflexales			uncultured_soil_bacterium
ASV262	90	0	60	131	168	49	52	31	0	17	26	16	85	0	0	0	0	725	Bacteria{superkingdom}(100);Bacteroidetes{phylum}(100);Cytophagia{class}(100);Cytophagales{order}(100);{family}(100);Ohtaekwangia{genus}(100);Unassigned{species}(0)	Bacteria	Bacteroidetes	Cytophagia	Cytophagales		Ohtaekwangia	Unassigned
ASV263	50	13	0	29	103	66	0	0	0	0	27	0	0	0	0	37	0	325	Bacteria{superkingdom}(94);Actinobacteria{phylum}(94);Actinobacteria{class}(94);Solirubrobacterales{order}(94);Conexibacteraceae{family}(94);Conexibacter{genus}(94);uncultured_Rubrobacteraceae_bacterium{species}(94)	Bacteria	Actinobacteria	Actinobacteria	Solirubrobacterales	Conexibacteraceae	Conexibacter	uncultured_Rubrobacteraceae_bacterium
ASV264	167	0	14	0	0	222	483	0	645	238	88	0	0	0	0	0	0	1857	Bacteria{superkingdom}(100);Chloroflexi{phylum}(100);Anaerolineae{class}(100);Anaerolineales{order}(100);Anaerolineaceae{family}(100);{genus}(100);uncultured_Gemmatimonadetes_bacterium{species}(100)	Bacteria	Chloroflexi	Anaerolineae	Anaerolineales	Anaerolineaceae		uncultured_Gemmatimonadetes_bacterium
ASV265	0	20	0	35	0	0	0	4	5	57	28	42	3	368	180	491	67	1300	Bacteria{superkingdom}(100);Proteobacteria{phylum}(100);Alphaproteobacteria{class}(100);Rhizobiales{order}(100);Methylobacteriaceae{family}(100);Microvirga{genus}(100);Unassigned{species}(0)	Bacteria	Proteobacteria	Alphaproteobacteria	Rhizobiales	Methylobacteriaceae	Microvirga	Unassigned
ASV266	124	0	30	229	117	29	0	37	38	111	0	30	10	0	0	59	0	814	Bacteria{superkingdom}(100);Proteobacteria{phylum}(100);Alphaproteobacteria{class}(100);Rhodospirillales{order}(100);{family}(100);Reyranella{genus}(100);Unassigned{species}(0)	Bacteria	Proteobacteria	Alphaproteobacteria	Rhodospirillales		Reyranella	Unassigned
ASV267	118	0	49	188	3233	17	42	0	18	10	6	56	0	8	0	0	0	3745	Bacteria{superkingdom}(100);Bacteroidetes{phylum}(100);Flavobacteriia{class}(100);Flavobacteriales{order}(100);Flavobacteriaceae{family}(100);Flavobacterium{genus}(100);Unassigned{species}(0)	Bacteria	Bacteroidetes	Flavobacteriia	Flavobacteriales	Flavobacteriaceae	Flavobacterium	Unassigned
ASV268	75	0	50	47	34	35	72	173	43	286	175	173	245	283	1305	53	237	3286	Bacteria{superkingdom}(100);{phylum}(100);{class}(100);{order}(100);{family}(100);{genus}(100);uncultured_Actinomyces_sp.{species}(100)	Bacteria						uncultured_Actinomyces_sp.
ASV269	16	56	24	25	0	614	0	0	0	312	0	0	0	0	0	0	0	1047	Bacteria{superkingdom}(87);Actinobacteria{phylum}(87);Actinobacteria{class}(87);Actinomycetales{order}(87);Pseudonocardiaceae{family}(87);Kibdelosporangium{genus}(87);uncultured_bacterium{species}(87)	Bacteria	Actinobacteria	Actinobacteria	Actinomycetales	Pseudonocardiaceae	Kibdelosporangium	uncultured_bacterium
ASV270	103	144	149	128	109	99	104	65	114	88	35	140	79	54	0	71	85	1567	Bacteria{superkingdom}(100);Proteobacteria{phylum}(100);Unassigned{class}(0);Unassigned{order}(0);Unassigned{family}(0);Unassigned{genus}(0);Unassigned{species}(0)	Bacteria	Proteobacteria	Unassigned	Unassigned	Unassigned	Unassigned	Unassigned
ASV271	85	0	229	90	168	246	39	0	0	0	0	0	23	0	0	66	46	992	Bacteria{superkingdom}(98);Chloroflexi{phylum}(98);Anaerolineae{class}(98);Anaerolineales{order}(98);Anaerolineaceae{family}(98);{genus}(98);uncultured_soil_bacterium{species}(98)	Bacteria	Chloroflexi	Anaerolineae	Anaerolineales	Anaerolineaceae		uncultured_soil_bacterium
ASV272	332	194	103	25	196	159	73	22	69	25	28	15	27	0	0	43	33	1344	Bacteria{superkingdom}(98);Nitrospirae{phylum}(98);Nitrospira{class}(98);Nitrospirales{order}(98);Nitrospiraceae{family}(98);Nitrospira{genus}(98);uncultured_Nitrospiraceae_bacterium{species}(98)	Bacteria	Nitrospirae	Nitrospira	Nitrospirales	Nitrospiraceae	Nitrospira	uncultured_Nitrospiraceae_bacterium
ASV273	57	0	44	0	47	119	0	0	0	0	0	0	0	0	0	0	0	267	Bacteria{superkingdom}(100);Proteobacteria{phylum}(100);Alphaproteobacteria{class}(100);Rhizobiales{order}(100);Hyphomicrobiaceae{family}(100);Pedomicrobium{genus}(100);Unassigned{species}(0)	Bacteria	Proteobacteria	Alphaproteobacteria	Rhizobiales	Hyphomicrobiaceae	Pedomicrobium	Unassigned
ASV274	0	0	0	78	95	0	0	0	0	0	0	0	0	0	0	0	0	173	Bacteria{superkingdom}(83);Actinobacteria{phylum}(83);Actinobacteria{class}(83);Actinomycetales{order}(83);Pseudonocardiaceae{family}(83);Unassigned{genus}(0);Unassigned{species}(0)	Bacteria	Actinobacteria	Actinobacteria	Actinomycetales	Pseudonocardiaceae	Unassigned	Unassigned
ASV275	0	0	0	0	0	0	0	0	0	0	0	27	0	0	9	0	0	36	Bacteria{superkingdom}(99);Proteobacteria{phylum}(99);Gammaproteobacteria{class}(99);Pseudomonadales{order}(99);Pseudomonadaceae{family}(99);Pseudomonas{genus}(99);Unassigned{species}(0)	Bacteria	Proteobacteria	Gammaproteobacteria	Pseudomonadales	Pseudomonadaceae	Pseudomonas	Unassigned
ASV276	88	0	100	88	70	75	67	113	148	399	123	218	0	88	112	76	566	2331	Bacteria{superkingdom}(93);Chloroflexi{phylum}(93);Anaerolineae{class}(93);Anaerolineales{order}(93);Anaerolineaceae{family}(93);{genus}(93);uncultured_Caldilineales_bacterium{species}(93)	Bacteria	Chloroflexi	Anaerolineae	Anaerolineales	Anaerolineaceae		uncultured_Caldilineales_bacterium
ASV277	159	0	50	52	0	53	37	133	42	302	0	257	0	0	135	539	160	1919	Bacteria{superkingdom}(81);Actinobacteria{phylum}(81);Actinobacteria{class}(81);Solirubrobacterales{order}(81);Conexibacteraceae{family}(81);Conexibacter{genus}(81);Unassigned{species}(0)	Bacteria	Actinobacteria	Actinobacteria	Solirubrobacterales	Conexibacteraceae	Conexibacter	Unassigned
ASV278	64	107	0	43	25	0	0	28	687	229	0	37	26	39	0	47	25	1357	Bacteria{superkingdom}(96);Proteobacteria{phylum}(96);Alphaproteobacteria{class}(96);Rhizobiales{order}(96);{family}(96);{genus}(96);uncultured_endolithic_bacterium{species}(96)	Bacteria	Proteobacteria	Alphaproteobacteria	Rhizobiales			uncultured_endolithic_bacterium
ASV279	59	100	110	41	182	65	70	41	87	86	43	73	147	84	73	111	435	1807	Bacteria{superkingdom}(98);Acidobacteria{phylum}(98);Acidobacteria_Gp3{class}(98);{order}(98);{family}(98);Gp3{genus}(98);Unassigned{species}(0)	Bacteria	Acidobacteria	Acidobacteria_Gp3			Gp3	Unassigned
ASV280	95	0	84	275	94	119	0	0	0	0	0	0	0	0	0	0	0	667	Bacteria{superkingdom}(100);Proteobacteria{phylum}(100);Gammaproteobacteria{class}(100);Xanthomonadales{order}(100);Xanthomonadaceae{family}(100);Lysobacter{genus}(100);Unassigned{species}(0)	Bacteria	Proteobacteria	Gammaproteobacteria	Xanthomonadales	Xanthomonadaceae	Lysobacter	Unassigned
ASV281	80	44	48	31	81	195	0	0	0	0	0	0	0	0	0	65	0	544	Bacteria{superkingdom}(83);Acidobacteria{phylum}(83);Acidobacteria_Gp3{class}(83);{order}(83);{family}(83);{genus}(83);uncultured_Candidatus_Solibacter_sp.{species}(83)	Bacteria	Acidobacteria	Acidobacteria_Gp3				uncultured_Candidatus_Solibacter_sp.
ASV282	165	0	76	75	51	105	209	89	0	26	45	21	0	0	0	0	0	862	Bacteria{superkingdom}(94);Proteobacteria{phylum}(94);Gammaproteobacteria{class}(94);{order}(94);{family}(94);{genus}(94);uncultured_Steroidobacter_sp.{species}(94)	Bacteria	Proteobacteria	Gammaproteobacteria				uncultured_Steroidobacter_sp.
ASV283	0	0	0	0	0	101	0	0	0	0	0	0	0	0	0	0	0	101	Bacteria{superkingdom}(87);Actinobacteria{phylum}(87);Actinobacteria{class}(87);Actinomycetales{order}(87);Pseudonocardiaceae{family}(87);Actinophytocola{genus}(87);uncultured_bacterium{species}(87)	Bacteria	Actinobacteria	Actinobacteria	Actinomycetales	Pseudonocardiaceae	Actinophytocola	uncultured_bacterium
ASV284	66	123	102	73	0	58	0	187	43	66	0	127	94	0	233	66	155	1393	Bacteria{superkingdom}(99);Proteobacteria{phylum}(99);Betaproteobacteria{class}(99);{order}(99);{family}(99);{genus}(99);Unassigned{species}(0)	Bacteria	Proteobacteria	Betaproteobacteria				Unassigned
ASV285	48	19	54	345	48	140	0	0	0	0	0	0	0	0	0	0	0	654	Bacteria{superkingdom}(100);Actinobacteria{phylum}(100);Actinobacteria{class}(100);Actinomycetales{order}(100);Pseudonocardiaceae{family}(100);Pseudonocardia{genus}(100);Unassigned{species}(0)	Bacteria	Actinobacteria	Actinobacteria	Actinomycetales	Pseudonocardiaceae	Pseudonocardia	Unassigned
ASV286	390	0	145	144	297	60	9	0	0	0	0	0	163	0	0	0	60	1268	Bacteria{superkingdom}(100);Bacteroidetes{phylum}(100);Cytophagia{class}(100);Cytophagales{order}(100);{family}(100);Ohtaekwangia{genus}(100);Unassigned{species}(0)	Bacteria	Bacteroidetes	Cytophagia	Cytophagales		Ohtaekwangia	Unassigned
ASV287	34	138	0	14	45	150	0	0	0	12	0	0	54	0	0	0	9	456	Bacteria{superkingdom}(85);Actinobacteria{phylum}(85);Actinobacteria{class}(85);Acidimicrobiales{order}(85);Iamiaceae{family}(85);{genus}(85);uncultured_Iamia_sp.{species}(85)	Bacteria	Actinobacteria	Actinobacteria	Acidimicrobiales	Iamiaceae		uncultured_Iamia_sp.
ASV288	213	89	171	45	38	38	300	53	227	117	61	225	0	0	5	35	0	1617	Bacteria{superkingdom}(100);Actinobacteria{phylum}(100);Actinobacteria{class}(100);Actinomycetales{order}(100);Intrasporangiaceae{family}(100);Unassigned{genus}(0);Unassigned{species}(0)	Bacteria	Actinobacteria	Actinobacteria	Actinomycetales	Intrasporangiaceae	Unassigned	Unassigned
ASV289	118	112	0	0	72	0	87	53	10	54	0	138	0	0	23	77	86	830	Bacteria{superkingdom}(99);Acidobacteria{phylum}(99);Acidobacteria_Gp6{class}(99);{order}(99);{family}(99);Gp6{genus}(99);Unassigned{species}(0)	Bacteria	Acidobacteria	Acidobacteria_Gp6			Gp6	Unassigned
ASV290	0	32	21	41	39	54	33	0	0	0	0	0	94	22	0	0	14	350	Bacteria{superkingdom}(100);Actinobacteria{phylum}(100);Actinobacteria{class}(100);Solirubrobacterales{order}(100);Conexibacteraceae{family}(100);Conexibacter{genus}(100);Unassigned{species}(0)	Bacteria	Actinobacteria	Actinobacteria	Solirubrobacterales	Conexibacteraceae	Conexibacter	Unassigned
ASV291	259	0	22	55	121	20	0	31	24	30	0	19	260	0	30	36	70	977	Bacteria{superkingdom}(86);Bacteroidetes{phylum}(86);Sphingobacteriia{class}(86);Sphingobacteriales{order}(86);Chitinophagaceae{family}(86);Niastella{genus}(86);uncultured_bacterium{species}(86)	Bacteria	Bacteroidetes	Sphingobacteriia	Sphingobacteriales	Chitinophagaceae	Niastella	uncultured_bacterium
ASV292	0	0	70	0	142	188	0	0	0	0	0	0	0	0	0	0	0	400	Bacteria{superkingdom}(100);Proteobacteria{phylum}(100);Alphaproteobacteria{class}(100);Rhizobiales{order}(100);Rhizobiaceae{family}(100);Ensifer{genus}(100);Unassigned{species}(0)	Bacteria	Proteobacteria	Alphaproteobacteria	Rhizobiales	Rhizobiaceae	Ensifer	Unassigned
ASV293	81	306	60	64	37	44	44	85	67	122	47	122	140	28	113	32	108	1500	Bacteria{superkingdom}(84);Proteobacteria{phylum}(84);Betaproteobacteria{class}(84);{order}(84);{family}(84);{genus}(84);uncultured_Burkholderiaceae_bacterium{species}(84)	Bacteria	Proteobacteria	Betaproteobacteria				uncultured_Burkholderiaceae_bacterium
ASV294	0	0	0	66	0	0	0	27	26	225	33	361	0	1082	36	389	0	2245	Bacteria{superkingdom}(98);Actinobacteria{phylum}(98);Actinobacteria{class}(98);Actinomycetales{order}(98);Streptomycetaceae{family}(98);Streptomyces{genus}(98);Unassigned{species}(0)	Bacteria	Actinobacteria	Actinobacteria	Actinomycetales	Streptomycetaceae	Streptomyces	Unassigned
ASV295	152	58	314	0	91	59	81	17	37	0	15	0	24	0	0	0	0	848	Bacteria{superkingdom}(100);Proteobacteria{phylum}(100);Alphaproteobacteria{class}(100);Rhizobiales{order}(100);Rhizobiaceae{family}(100);Ensifer{genus}(100);Unassigned{species}(0)	Bacteria	Proteobacteria	Alphaproteobacteria	Rhizobiales	Rhizobiaceae	Ensifer	Unassigned
ASV296	0	84	59	0	151	582	14	0	0	0	29	0	0	39	0	0	20	978	Bacteria{superkingdom}(99);Acidobacteria{phylum}(99);Acidobacteria_Gp4{class}(99);{order}(99);{family}(99);Aridibacter{genus}(99);Unassigned{species}(0)	Bacteria	Acidobacteria	Acidobacteria_Gp4			Aridibacter	Unassigned
ASV297	86	28	72	64	100	57	137	25	165	145	78	49	81	83	0	0	54	1224	Bacteria{superkingdom}(100);Proteobacteria{phylum}(100);Deltaproteobacteria{class}(100);{order}(100);{family}(100);{genus}(100);uncultured_Acidobacteriales_bacterium{species}(100)	Bacteria	Proteobacteria	Deltaproteobacteria				uncultured_Acidobacteriales_bacterium
ASV298	140	63	64	70	74	50	136	86	89	228	32	91	159	23	12	42	28	1387	Bacteria{superkingdom}(100);Firmicutes{phylum}(100);Bacilli{class}(100);Bacillales{order}(100);Bacillaceae_1{family}(100);Bacillus{genus}(100);Unassigned{species}(0)	Bacteria	Firmicutes	Bacilli	Bacillales	Bacillaceae_1	Bacillus	Unassigned
ASV299	20	0	0	0	0	0	0	0	166	37	19	1075	34	144	0	0	31	1526	Bacteria{superkingdom}(100);Acidobacteria{phylum}(100);Acidobacteria_Gp4{class}(100);{order}(100);{family}(100);Gp4{genus}(100);Unassigned{species}(0)	Bacteria	Acidobacteria	Acidobacteria_Gp4			Gp4	Unassigned
ASV300	47	0	0	29	0	0	0	132	0	31	0	99	46	660	88	722	60	1914	Bacteria{superkingdom}(99);Actinobacteria{phylum}(99);Actinobacteria{class}(99);{order}(99);{family}(99);{genus}(99);uncultured_Actinomycetales_bacterium{species}(99)	Bacteria	Actinobacteria	Actinobacteria				uncultured_Actinomycetales_bacterium
ASV301	58	0	151	169	60	0	0	0	0	0	0	0	0	0	0	0	0	438	Bacteria{superkingdom}(100);Proteobacteria{phylum}(100);Alphaproteobacteria{class}(100);Rhizobiales{order}(100);Rhizobiaceae{family}(100);Ensifer{genus}(100);Unassigned{species}(0)	Bacteria	Proteobacteria	Alphaproteobacteria	Rhizobiales	Rhizobiaceae	Ensifer	Unassigned
ASV302	81	0	122	232	51	0	153	0	102	0	42	86	0	0	0	0	0	869	Bacteria{superkingdom}(100);Actinobacteria{phylum}(100);Actinobacteria{class}(100);Actinomycetales{order}(100);Nocardioidaceae{family}(100);Nocardioides{genus}(100);Unassigned{species}(0)	Bacteria	Actinobacteria	Actinobacteria	Actinomycetales	Nocardioidaceae	Nocardioides	Unassigned
ASV304	38	0	0	72	75	53	0	0	0	0	0	0	0	0	0	0	0	238	Bacteria{superkingdom}(100);Acidobacteria{phylum}(100);Acidobacteria_Gp6{class}(100);{order}(100);{family}(100);Gp6{genus}(100);Unassigned{species}(0)	Bacteria	Acidobacteria	Acidobacteria_Gp6			Gp6	Unassigned
ASV306	155	70	266	69	99	93	153	19	36	26	68	85	0	0	8	0	28	1175	Bacteria{superkingdom}(100);Chloroflexi{phylum}(100);Chloroflexia{class}(100);{order}(100);{family}(100);{genus}(100);uncultured_soil_bacterium{species}(100)	Bacteria	Chloroflexi	Chloroflexia				uncultured_soil_bacterium
ASV307	39	15	9	70	50	97	0	0	0	0	0	0	40	0	0	0	11	331	Bacteria{superkingdom}(100);Proteobacteria{phylum}(100);Alphaproteobacteria{class}(100);Rhodospirillales{order}(100);Rhodospirillaceae{family}(100);Inquilinus{genus}(100);Unassigned{species}(0)	Bacteria	Proteobacteria	Alphaproteobacteria	Rhodospirillales	Rhodospirillaceae	Inquilinus	Unassigned
ASV308	110	48	91	59	49	62	56	130	100	123	89	160	280	171	0	101	228	1857	Bacteria{superkingdom}(82);Proteobacteria{phylum}(82);Alphaproteobacteria{class}(82);Rhodospirillales{order}(82);Rhodospirillaceae{family}(82);{genus}(82);Unassigned{species}(0)	Bacteria	Proteobacteria	Alphaproteobacteria	Rhodospirillales	Rhodospirillaceae		Unassigned
ASV309	27	0	0	0	0	0	0	0	0	0	0	0	0	0	0	0	0	27	Bacteria{superkingdom}(100);Acidobacteria{phylum}(100);Acidobacteria_Gp10{class}(100);{order}(100);{family}(100);Gp10{genus}(100);Unassigned{species}(0)	Bacteria	Acidobacteria	Acidobacteria_Gp10			Gp10	Unassigned
ASV310	116	116	151	115	123	116	173	90	140	149	20	42	0	0	0	0	19	1370	Bacteria{superkingdom}(100);Gemmatimonadetes{phylum}(100);Gemmatimonadetes{class}(100);Gemmatimonadales{order}(100);Gemmatimonadaceae{family}(100);Gemmatimonas{genus}(100);Unassigned{species}(0)	Bacteria	Gemmatimonadetes	Gemmatimonadetes	Gemmatimonadales	Gemmatimonadaceae	Gemmatimonas	Unassigned
ASV311	275	29	0	0	506	0	115	0	0	0	0	0	0	0	0	0	0	925	Bacteria{superkingdom}(100);Bacteroidetes{phylum}(100);Sphingobacteriia{class}(100);Sphingobacteriales{order}(100);Chitinophagaceae{family}(100);Chitinophaga{genus}(100);Unassigned{species}(0)	Bacteria	Bacteroidetes	Sphingobacteriia	Sphingobacteriales	Chitinophagaceae	Chitinophaga	Unassigned
ASV312	21	145	0	0	0	0	0	0	0	0	0	17	0	0	0	59	0	242	Bacteria{superkingdom}(94);Acidobacteria{phylum}(94);Acidobacteria_Gp4{class}(94);{order}(94);{family}(94);Aridibacter{genus}(94);Unassigned{species}(0)	Bacteria	Acidobacteria	Acidobacteria_Gp4			Aridibacter	Unassigned
ASV313	167	61	159	0	0	37	57	0	0	0	0	0	0	0	0	49	0	530	Bacteria{superkingdom}(99);Actinobacteria{phylum}(99);Actinobacteria{class}(99);Actinomycetales{order}(99);Streptomycetaceae{family}(99);Streptomyces{genus}(99);Unassigned{species}(0)	Bacteria	Actinobacteria	Actinobacteria	Actinomycetales	Streptomycetaceae	Streptomyces	Unassigned
ASV314	80	123	38	44	28	18	0	0	0	317	45	41	0	0	0	404	0	1138	Bacteria{superkingdom}(100);Proteobacteria{phylum}(100);Alphaproteobacteria{class}(100);Rhizobiales{order}(100);{family}(100);{genus}(100);uncultured_endolithic_bacterium{species}(100)	Bacteria	Proteobacteria	Alphaproteobacteria	Rhizobiales			uncultured_endolithic_bacterium
ASV315	115	99	36	57	0	69	488	293	219	132	36	50	0	81	57	129	56	1917	Bacteria{superkingdom}(100);Actinobacteria{phylum}(100);Actinobacteria{class}(100);Gaiellales{order}(100);Gaiellaceae{family}(100);Gaiella{genus}(100);Unassigned{species}(0)	Bacteria	Actinobacteria	Actinobacteria	Gaiellales	Gaiellaceae	Gaiella	Unassigned
ASV316	308	46	81	86	88	35	167	167	329	131	20	112	0	0	0	0	0	1570	Bacteria{superkingdom}(100);Chloroflexi{phylum}(100);Chloroflexia{class}(100);{order}(100);{family}(100);{genus}(100);uncultured_bacterium{species}(100)	Bacteria	Chloroflexi	Chloroflexia				uncultured_bacterium
ASV317	1168	50	143	0	0	0	297	0	0	0	0	0	0	0	0	0	0	1658	Bacteria{superkingdom}(100);Bacteroidetes{phylum}(100);Sphingobacteriia{class}(100);Sphingobacteriales{order}(100);Chitinophagaceae{family}(100);Chitinophaga{genus}(100);Unassigned{species}(0)	Bacteria	Bacteroidetes	Sphingobacteriia	Sphingobacteriales	Chitinophagaceae	Chitinophaga	Unassigned
ASV318	85	84	100	13	69	152	161	262	190	72	54	69	96	0	10	86	28	1531	Bacteria{superkingdom}(80);Chloroflexi{phylum}(80);Thermomicrobia{class}(80);Sphaerobacterales{order}(80);Sphaerobacteraceae{family}(80);Nitrolancea{genus}(80);Unassigned{species}(0)	Bacteria	Chloroflexi	Thermomicrobia	Sphaerobacterales	Sphaerobacteraceae	Nitrolancea	Unassigned
ASV319	118	218	175	104	131	89	12	0	40	38	6	81	0	32	9	64	0	1117	Bacteria{superkingdom}(100);Chloroflexi{phylum}(100);Thermomicrobia{class}(100);Sphaerobacterales{order}(100);Sphaerobacteraceae{family}(100);{genus}(100);Unassigned{species}(0)	Bacteria	Chloroflexi	Thermomicrobia	Sphaerobacterales	Sphaerobacteraceae		Unassigned
ASV320	11	45	30	7	7	0	0	0	0	11	0	798	0	38	14	21	18	1000	Bacteria{superkingdom}(97);Proteobacteria{phylum}(97);Betaproteobacteria{class}(97);Burkholderiales{order}(97);Oxalobacteraceae{family}(97);Massilia{genus}(97);Unassigned{species}(0)	Bacteria	Proteobacteria	Betaproteobacteria	Burkholderiales	Oxalobacteraceae	Massilia	Unassigned
ASV321	75	0	0	0	0	0	0	0	0	0	0	0	0	0	0	26	0	101	Bacteria{superkingdom}(100);Bacteroidetes{phylum}(100);Sphingobacteriia{class}(100);Sphingobacteriales{order}(100);Chitinophagaceae{family}(100);{genus}(100);uncultured_Cytophaga_sp.{species}(100)	Bacteria	Bacteroidetes	Sphingobacteriia	Sphingobacteriales	Chitinophagaceae		uncultured_Cytophaga_sp.
ASV322	33	0	22	56	29	71	101	78	24	53	20	40	0	111	4	6	10	658	Bacteria{superkingdom}(100);Actinobacteria{phylum}(100);Actinobacteria{class}(100);Actinomycetales{order}(100);Micromonosporaceae{family}(100);Unassigned{genus}(0);Unassigned{species}(0)	Bacteria	Actinobacteria	Actinobacteria	Actinomycetales	Micromonosporaceae	Unassigned	Unassigned
ASV323	127	0	196	0	0	0	224	728	268	56	70	234	30	0	32	83	199	2247	Bacteria{superkingdom}(97);Actinobacteria{phylum}(97);Actinobacteria{class}(97);{order}(97);{family}(97);{genus}(97);uncultured_Acidothermaceae_bacterium{species}(97)	Bacteria	Actinobacteria	Actinobacteria				uncultured_Acidothermaceae_bacterium
ASV324	107	0	67	36	56	179	87	6	0	0	0	0	13	0	19	0	0	570	Bacteria{superkingdom}(100);Gemmatimonadetes{phylum}(100);Gemmatimonadetes{class}(100);Gemmatimonadales{order}(100);Gemmatimonadaceae{family}(100);Gemmatimonas{genus}(100);Unassigned{species}(0)	Bacteria	Gemmatimonadetes	Gemmatimonadetes	Gemmatimonadales	Gemmatimonadaceae	Gemmatimonas	Unassigned
ASV325	139	57	88	54	57	65	119	29	103	30	70	0	31	0	0	30	0	872	Bacteria{superkingdom}(99);Proteobacteria{phylum}(99);Deltaproteobacteria{class}(99);{order}(99);{family}(99);{genus}(99);Unassigned{species}(0)	Bacteria	Proteobacteria	Deltaproteobacteria				Unassigned
ASV326	107	0	49	48	104	58	60	131	62	300	0	66	0	56	0	32	0	1073	Bacteria{superkingdom}(99);Proteobacteria{phylum}(99);Alphaproteobacteria{class}(99);Rhizobiales{order}(99);Hyphomicrobiaceae{family}(99);Hyphomicrobium{genus}(99);Unassigned{species}(0)	Bacteria	Proteobacteria	Alphaproteobacteria	Rhizobiales	Hyphomicrobiaceae	Hyphomicrobium	Unassigned
ASV327	6	69	12	0	11	0	51	61	82	142	15	87	17	348	186	259	33	1379	Bacteria{superkingdom}(100);{phylum}(100);{class}(100);{order}(100);{family}(100);{genus}(100);uncultured_candidate_division_WYO_bacterium{species}(100)	Bacteria						uncultured_candidate_division_WYO_bacterium
ASV328	0	0	118	67	56	65	0	0	0	0	0	0	0	0	0	0	0	306	Bacteria{superkingdom}(98);Proteobacteria{phylum}(98);Alphaproteobacteria{class}(98);Rhizobiales{order}(98);Rhizobiaceae{family}(98);Rhizobium{genus}(98);Unassigned{species}(0)	Bacteria	Proteobacteria	Alphaproteobacteria	Rhizobiales	Rhizobiaceae	Rhizobium	Unassigned
ASV329	175	0	0	0	136	248	0	0	0	0	0	0	0	0	0	0	0	559	Bacteria{superkingdom}(85);Proteobacteria{phylum}(85);Alphaproteobacteria{class}(85);Rhizobiales{order}(85);Hyphomicrobiaceae{family}(85);Hyphomicrobium{genus}(85);Unassigned{species}(0)	Bacteria	Proteobacteria	Alphaproteobacteria	Rhizobiales	Hyphomicrobiaceae	Hyphomicrobium	Unassigned
ASV330	87	61	61	107	257	105	8	6	7	0	7	15	7	22	12	32	8	802	Bacteria{superkingdom}(100);Actinobacteria{phylum}(100);Actinobacteria{class}(100);Acidimicrobiales{order}(100);Iamiaceae{family}(100);Iamia{genus}(100);uncultured_bacterium{species}(100)	Bacteria	Actinobacteria	Actinobacteria	Acidimicrobiales	Iamiaceae	Iamia	uncultured_bacterium
ASV331	162	483	74	0	98	0	92	1107	451	58	0	125	0	0	0	0	0	2650	Bacteria{superkingdom}(99);Chloroflexi{phylum}(99);Unassigned{class}(0);Unassigned{order}(0);Unassigned{family}(0);Unassigned{genus}(0);Unassigned{species}(0)	Bacteria	Chloroflexi	Unassigned	Unassigned	Unassigned	Unassigned	Unassigned
ASV332	122	0	122	52	204	34	62	80	65	0	32	103	296	236	0	40	473	1921	Bacteria{superkingdom}(94);Planctomycetes{phylum}(94);Planctomycetia{class}(94);Planctomycetales{order}(94);Planctomycetaceae{family}(94);Gimesia{genus}(94);uncultured_Planctomyces_sp.{species}(94)	Bacteria	Planctomycetes	Planctomycetia	Planctomycetales	Planctomycetaceae	Gimesia	uncultured_Planctomyces_sp.
ASV333	84	18	158	248	191	241	15	0	0	0	0	31	11	25	45	32	0	1099	Bacteria{superkingdom}(100);Bacteroidetes{phylum}(100);Sphingobacteriia{class}(100);Sphingobacteriales{order}(100);Chitinophagaceae{family}(100);Ferruginibacter{genus}(100);Unassigned{species}(0)	Bacteria	Bacteroidetes	Sphingobacteriia	Sphingobacteriales	Chitinophagaceae	Ferruginibacter	Unassigned
ASV334	0	27	0	0	0	0	0	0	0	0	0	0	0	0	0	0	0	27	Bacteria{superkingdom}(90);Actinobacteria{phylum}(90);Actinobacteria{class}(90);Actinomycetales{order}(90);Pseudonocardiaceae{family}(90);Amycolatopsis{genus}(90);Unassigned{species}(0)	Bacteria	Actinobacteria	Actinobacteria	Actinomycetales	Pseudonocardiaceae	Amycolatopsis	Unassigned
ASV335	85	8	56	55	91	44	23	18	28	61	0	43	117	66	52	48	76	871	Bacteria{superkingdom}(100);Proteobacteria{phylum}(100);Alphaproteobacteria{class}(100);Rhizobiales{order}(100);Hyphomicrobiaceae{family}(100);Devosia{genus}(100);Unassigned{species}(0)	Bacteria	Proteobacteria	Alphaproteobacteria	Rhizobiales	Hyphomicrobiaceae	Devosia	Unassigned
ASV337	100	75	73	157	0	0	75	123	50	254	49	142	0	16	53	63	28	1258	Bacteria{superkingdom}(99);Chloroflexi{phylum}(99);Thermomicrobia{class}(99);Sphaerobacterales{order}(99);Sphaerobacteraceae{family}(99);Unassigned{genus}(0);Unassigned{species}(0)	Bacteria	Chloroflexi	Thermomicrobia	Sphaerobacterales	Sphaerobacteraceae	Unassigned	Unassigned
ASV338	321	0	0	0	113	320	0	0	0	0	0	0	0	0	0	0	0	754	Bacteria{superkingdom}(82);Proteobacteria{phylum}(82);Deltaproteobacteria{class}(82);Myxococcales{order}(82);Kofleriaceae{family}(82);Kofleria{genus}(82);Kofleria_flava{species}(82)	Bacteria	Proteobacteria	Deltaproteobacteria	Myxococcales	Kofleriaceae	Kofleria	Kofleria_flava
ASV339	0	0	0	0	89	96	0	0	0	0	0	0	0	0	0	0	0	185	Bacteria{superkingdom}(97);Planctomycetes{phylum}(97);Planctomycetia{class}(97);Planctomycetales{order}(97);Planctomycetaceae{family}(97);{genus}(97);Planctomyces_sp.{species}(97)	Bacteria	Planctomycetes	Planctomycetia	Planctomycetales	Planctomycetaceae		Planctomyces_sp.
ASV340	100	36	100	130	115	0	37	0	22	9	0	0	0	122	65	35	12	783	Bacteria{superkingdom}(100);Actinobacteria{phylum}(100);Actinobacteria{class}(100);Actinomycetales{order}(100);Nocardioidaceae{family}(100);Nocardioides{genus}(100);Unassigned{species}(0)	Bacteria	Actinobacteria	Actinobacteria	Actinomycetales	Nocardioidaceae	Nocardioides	Unassigned
ASV341	121	0	273	99	76	71	0	0	0	98	0	67	0	102	25	114	0	1046	Bacteria{superkingdom}(100);Chloroflexi{phylum}(100);{class}(100);{order}(100);{family}(100);{genus}(100);uncultured_Anaerolineae_bacterium{species}(100)	Bacteria	Chloroflexi					uncultured_Anaerolineae_bacterium
ASV342	19	0	11	40	21	28	29	55	58	79	74	103	306	100	229	32	137	1321	Bacteria{superkingdom}(99);Proteobacteria{phylum}(99);Betaproteobacteria{class}(99);Burkholderiales{order}(99);Comamonadaceae{family}(99);Unassigned{genus}(0);Unassigned{species}(0)	Bacteria	Proteobacteria	Betaproteobacteria	Burkholderiales	Comamonadaceae	Unassigned	Unassigned
ASV343	169	129	183	43	0	0	0	0	0	534	0	0	0	69	0	0	0	1127	Bacteria{superkingdom}(100);Acidobacteria{phylum}(100);Acidobacteria_Gp10{class}(100);{order}(100);{family}(100);Gp10{genus}(100);Unassigned{species}(0)	Bacteria	Acidobacteria	Acidobacteria_Gp10			Gp10	Unassigned
ASV344	42	82	160	0	74	85	220	38	195	0	0	40	0	0	0	0	0	936	Bacteria{superkingdom}(96);Chloroflexi{phylum}(96);Anaerolineae{class}(96);Anaerolineales{order}(96);Anaerolineaceae{family}(96);{genus}(96);uncultured_soil_bacterium{species}(96)	Bacteria	Chloroflexi	Anaerolineae	Anaerolineales	Anaerolineaceae		uncultured_soil_bacterium
ASV345	37	127	0	0	0	0	34	23	73	0	0	35	0	0	0	163	0	492	Bacteria{superkingdom}(100);Actinobacteria{phylum}(100);Actinobacteria{class}(100);Actinomycetales{order}(100);Streptomycetaceae{family}(100);Streptomyces{genus}(100);Unassigned{species}(0)	Bacteria	Actinobacteria	Actinobacteria	Actinomycetales	Streptomycetaceae	Streptomyces	Unassigned
ASV346	53	244	17	31	36	19	54	19	12	84	25	44	12	173	176	186	27	1212	Bacteria{superkingdom}(100);Acidobacteria{phylum}(100);Acidobacteria_Gp6{class}(100);{order}(100);{family}(100);Gp6{genus}(100);Unassigned{species}(0)	Bacteria	Acidobacteria	Acidobacteria_Gp6			Gp6	Unassigned
ASV347	53	15	60	138	162	17	17	18	16	14	11	13	54	52	27	0	57	724	Bacteria{superkingdom}(100);Chloroflexi{phylum}(100);Caldilineae{class}(100);Caldilineales{order}(100);Caldilineaceae{family}(100);Litorilinea{genus}(100);Unassigned{species}(0)	Bacteria	Chloroflexi	Caldilineae	Caldilineales	Caldilineaceae	Litorilinea	Unassigned
ASV348	43	27	25	74	19	14	13	11	8	70	16	20	19	71	58	150	20	658	Bacteria{superkingdom}(96);Actinobacteria{phylum}(96);Actinobacteria{class}(96);Actinomycetales{order}(96);Mycobacteriaceae{family}(96);Mycobacterium{genus}(96);Unassigned{species}(0)	Bacteria	Actinobacteria	Actinobacteria	Actinomycetales	Mycobacteriaceae	Mycobacterium	Unassigned
ASV349	0	0	0	0	128	0	0	0	0	0	0	0	0	29	11	0	0	168	Bacteria{superkingdom}(100);Bacteroidetes{phylum}(100);Sphingobacteriia{class}(100);Sphingobacteriales{order}(100);Chitinophagaceae{family}(100);Chitinophaga{genus}(100);Unassigned{species}(0)	Bacteria	Bacteroidetes	Sphingobacteriia	Sphingobacteriales	Chitinophagaceae	Chitinophaga	Unassigned
ASV350	307	0	57	23	87	0	81	235	132	305	37	123	52	60	175	71	222	1967	Bacteria{superkingdom}(94);Proteobacteria{phylum}(94);Betaproteobacteria{class}(94);Burkholderiales{order}(94);Comamonadaceae{family}(94);Ramlibacter{genus}(94);Unassigned{species}(0)	Bacteria	Proteobacteria	Betaproteobacteria	Burkholderiales	Comamonadaceae	Ramlibacter	Unassigned
ASV352	0	267	69	0	283	55	30	0	264	78	0	0	60	0	73	35	0	1214	Bacteria{superkingdom}(100);Proteobacteria{phylum}(100);Alphaproteobacteria{class}(100);Rhizobiales{order}(100);Rhizobiaceae{family}(100);Rhizobium{genus}(100);Unassigned{species}(0)	Bacteria	Proteobacteria	Alphaproteobacteria	Rhizobiales	Rhizobiaceae	Rhizobium	Unassigned
ASV354	161	120	83	62	88	66	149	56	193	63	33	113	0	62	0	98	24	1371	Bacteria{superkingdom}(100);Acidobacteria{phylum}(100);Acidobacteria_Gp16{class}(100);{order}(100);{family}(100);Gp16{genus}(100);Unassigned{species}(0)	Bacteria	Acidobacteria	Acidobacteria_Gp16			Gp16	Unassigned
ASV355	70	43	200	0	46	62	600	124	131	0	0	180	0	0	0	0	125	1581	Bacteria{superkingdom}(100);Planctomycetes{phylum}(100);Planctomycetia{class}(100);Planctomycetales{order}(100);Planctomycetaceae{family}(100);Gimesia{genus}(100);Unassigned{species}(0)	Bacteria	Planctomycetes	Planctomycetia	Planctomycetales	Planctomycetaceae	Gimesia	Unassigned
ASV356	75	29	63	35	94	227	24	0	39	10	16	0	0	0	0	22	0	634	Bacteria{superkingdom}(99);Chloroflexi{phylum}(99);Caldilineae{class}(99);Caldilineales{order}(99);Caldilineaceae{family}(99);{genus}(99);uncultured_Chloroflexi_bacterium{species}(99)	Bacteria	Chloroflexi	Caldilineae	Caldilineales	Caldilineaceae		uncultured_Chloroflexi_bacterium
ASV358	21	0	0	0	0	0	36	0	42	0	0	0	0	0	0	47	0	146	Bacteria{superkingdom}(100);Proteobacteria{phylum}(100);Alphaproteobacteria{class}(100);Unassigned{order}(0);Unassigned{family}(0);Unassigned{genus}(0);Unassigned{species}(0)	Bacteria	Proteobacteria	Alphaproteobacteria	Unassigned	Unassigned	Unassigned	Unassigned
ASV359	55	113	0	1093	32	86	6	0	0	7	0	0	0	0	0	0	0	1392	Bacteria{superkingdom}(89);Actinobacteria{phylum}(89);Actinobacteria{class}(89);Actinomycetales{order}(89);Nocardioidaceae{family}(89);Nocardioides{genus}(89);Nocardioides_albus{species}(89)	Bacteria	Actinobacteria	Actinobacteria	Actinomycetales	Nocardioidaceae	Nocardioides	Nocardioides_albus
ASV360	0	0	25	84	0	0	0	0	29	14	0	22	0	0	0	0	0	174	Bacteria{superkingdom}(100);Bacteroidetes{phylum}(100);Sphingobacteriia{class}(100);Sphingobacteriales{order}(100);Chitinophagaceae{family}(100);Niastella{genus}(100);Unassigned{species}(0)	Bacteria	Bacteroidetes	Sphingobacteriia	Sphingobacteriales	Chitinophagaceae	Niastella	Unassigned
ASV361	0	0	7	0	0	0	0	0	0	1016	0	115	0	0	0	0	0	1138	Bacteria{superkingdom}(80);Acidobacteria{phylum}(80);Acidobacteria_Gp4{class}(80);{order}(80);{family}(80);Gp4{genus}(80);uncultured_Acidobacteriaceae_bacterium{species}(80)	Bacteria	Acidobacteria	Acidobacteria_Gp4			Gp4	uncultured_Acidobacteriaceae_bacterium
ASV362	0	0	0	0	0	37	0	0	173	0	0	0	0	0	0	0	0	210	Bacteria{superkingdom}(99);Proteobacteria{phylum}(99);Gammaproteobacteria{class}(99);{order}(99);{family}(99);{genus}(99);uncultured_Steroidobacter_sp.{species}(99)	Bacteria	Proteobacteria	Gammaproteobacteria				uncultured_Steroidobacter_sp.
ASV365	30	62	0	0	0	35	19	0	0	0	0	0	0	0	0	17	0	163	Bacteria{superkingdom}(100);Acidobacteria{phylum}(100);Acidobacteria_Gp6{class}(100);{order}(100);{family}(100);Gp6{genus}(100);Unassigned{species}(0)	Bacteria	Acidobacteria	Acidobacteria_Gp6			Gp6	Unassigned
ASV367	0	0	0	0	0	0	29	0	0	27	0	0	15	21	45	39	68	244	Bacteria{superkingdom}(100);Bacteroidetes{phylum}(100);Sphingobacteriia{class}(100);Sphingobacteriales{order}(100);Chitinophagaceae{family}(100);Chitinophaga{genus}(100);Unassigned{species}(0)	Bacteria	Bacteroidetes	Sphingobacteriia	Sphingobacteriales	Chitinophagaceae	Chitinophaga	Unassigned
ASV368	46	0	13	11	4	17	426	331	225	16	27	484	186	277	85	11	45	2204	Bacteria{superkingdom}(99);Actinobacteria{phylum}(99);Actinobacteria{class}(99);Actinomycetales{order}(99);Nocardioidaceae{family}(99);Nocardioides{genus}(99);Unassigned{species}(0)	Bacteria	Actinobacteria	Actinobacteria	Actinomycetales	Nocardioidaceae	Nocardioides	Unassigned
ASV369	98	0	39	0	65	92	44	0	0	0	0	0	24	0	0	114	0	476	Bacteria{superkingdom}(97);Planctomycetes{phylum}(97);Planctomycetia{class}(97);Planctomycetales{order}(97);Planctomycetaceae{family}(97);Blastopirellula{genus}(97);uncultured_bacterium{species}(97)	Bacteria	Planctomycetes	Planctomycetia	Planctomycetales	Planctomycetaceae	Blastopirellula	uncultured_bacterium
ASV370	0	0	0	0	0	0	12	0	0	0	0	0	0	0	0	0	0	12	Bacteria{superkingdom}(88);Chloroflexi{phylum}(88);Unassigned{class}(0);Unassigned{order}(0);Unassigned{family}(0);Unassigned{genus}(0);Unassigned{species}(0)	Bacteria	Chloroflexi	Unassigned	Unassigned	Unassigned	Unassigned	Unassigned
ASV371	0	0	40	79	71	0	60	0	0	0	33	0	0	0	0	0	0	283	Bacteria{superkingdom}(80);Proteobacteria{phylum}(80);Gammaproteobacteria{class}(80);Xanthomonadales{order}(80);Sinobacteraceae{family}(80);Povalibacter{genus}(80);uncultured_Burkholderiales_bacterium{species}(80)	Bacteria	Proteobacteria	Gammaproteobacteria	Xanthomonadales	Sinobacteraceae	Povalibacter	uncultured_Burkholderiales_bacterium
ASV372	71	77	91	168	45	42	0	35	15	143	0	33	0	0	0	42	0	762	Bacteria{superkingdom}(100);Actinobacteria{phylum}(100);Actinobacteria{class}(100);Rubrobacterales{order}(100);Rubrobacteraceae{family}(100);Rubrobacter{genus}(100);Unassigned{species}(0)	Bacteria	Actinobacteria	Actinobacteria	Rubrobacterales	Rubrobacteraceae	Rubrobacter	Unassigned
ASV373	139	0	76	51	34	39	56	183	182	217	16	144	0	0	44	105	202	1488	Bacteria{superkingdom}(99);Chloroflexi{phylum}(99);{class}(99);{order}(99);{family}(99);{genus}(99);Unassigned{species}(0)	Bacteria	Chloroflexi					Unassigned
ASV374	114	31	17	77	165	43	0	0	0	0	0	0	33	48	57	39	42	666	Bacteria{superkingdom}(92);Proteobacteria{phylum}(92);Alphaproteobacteria{class}(92);Rhizobiales{order}(92);Hyphomicrobiaceae{family}(92);Devosia{genus}(92);Unassigned{species}(0)	Bacteria	Proteobacteria	Alphaproteobacteria	Rhizobiales	Hyphomicrobiaceae	Devosia	Unassigned
ASV375	0	0	0	0	122	0	0	25	0	19	0	0	0	23	13	26	0	228	Bacteria{superkingdom}(98);Proteobacteria{phylum}(98);Betaproteobacteria{class}(98);Burkholderiales{order}(98);Comamonadaceae{family}(98);Variovorax{genus}(98);Unassigned{species}(0)	Bacteria	Proteobacteria	Betaproteobacteria	Burkholderiales	Comamonadaceae	Variovorax	Unassigned
ASV376	17	0	0	140	780	492	0	0	0	0	0	67	81	15	20	0	0	1612	Bacteria{superkingdom}(96);Bacteroidetes{phylum}(96);Sphingobacteriia{class}(96);Sphingobacteriales{order}(96);Chitinophagaceae{family}(96);{genus}(96);Unassigned{species}(0)	Bacteria	Bacteroidetes	Sphingobacteriia	Sphingobacteriales	Chitinophagaceae		Unassigned
ASV378	107	0	28	56	122	58	47	19	68	144	61	99	52	48	65	40	74	1088	Bacteria{superkingdom}(99);Proteobacteria{phylum}(99);Alphaproteobacteria{class}(99);Rhizobiales{order}(99);{family}(99);{genus}(99);uncultured_Nordella_sp.{species}(99)	Bacteria	Proteobacteria	Alphaproteobacteria	Rhizobiales			uncultured_Nordella_sp.
ASV379	0	0	0	0	10	0	0	0	0	0	0	0	0	0	0	0	0	10	Bacteria{superkingdom}(83);Bacteroidetes{phylum}(83);Flavobacteriia{class}(83);Flavobacteriales{order}(83);Flavobacteriaceae{family}(83);Chryseobacterium{genus}(83);Chryseobacterium_hagamense{species}(83)	Bacteria	Bacteroidetes	Flavobacteriia	Flavobacteriales	Flavobacteriaceae	Chryseobacterium	Chryseobacterium_hagamense
ASV380	70	0	27	94	0	185	0	0	24	29	7	0	0	0	0	0	0	436	Bacteria{superkingdom}(86);Proteobacteria{phylum}(86);Alphaproteobacteria{class}(86);Rhizobiales{order}(86);Hyphomicrobiaceae{family}(86);Pedomicrobium{genus}(86);uncultured_alpha_proteobacterium{species}(86)	Bacteria	Proteobacteria	Alphaproteobacteria	Rhizobiales	Hyphomicrobiaceae	Pedomicrobium	uncultured_alpha_proteobacterium
ASV381	80	35	31	0	23	70	0	15	0	0	0	0	81	0	0	34	27	396	Bacteria{superkingdom}(88);Proteobacteria{phylum}(88);Alphaproteobacteria{class}(88);Rhizobiales{order}(88);Hyphomicrobiaceae{family}(88);Pedomicrobium{genus}(88);uncultured_alpha_proteobacterium{species}(88)	Bacteria	Proteobacteria	Alphaproteobacteria	Rhizobiales	Hyphomicrobiaceae	Pedomicrobium	uncultured_alpha_proteobacterium
ASV382	82	0	80	44	84	0	242	0	0	231	42	52	38	0	95	0	48	1038	Bacteria{superkingdom}(86);Firmicutes{phylum}(86);Bacilli{class}(86);Bacillales{order}(86);Bacillaceae_1{family}(86);Bacillus{genus}(86);Bacillus_funiculus{species}(86)	Bacteria	Firmicutes	Bacilli	Bacillales	Bacillaceae_1	Bacillus	Bacillus_funiculus
ASV383	49	74	58	38	40	82	21	42	52	103	34	93	126	72	190	71	131	1276	Bacteria{superkingdom}(100);Proteobacteria{phylum}(100);Alphaproteobacteria{class}(100);Rhizobiales{order}(100);Rhizobiales_incertae_sedis{family}(100);Vasilyevaea{genus}(100);Unassigned{species}(0)	Bacteria	Proteobacteria	Alphaproteobacteria	Rhizobiales	Rhizobiales_incertae_sedis	Vasilyevaea	Unassigned
ASV384	24	0	0	69	52	82	0	0	0	0	0	0	0	0	0	0	0	227	Bacteria{superkingdom}(100);Planctomycetes{phylum}(100);Planctomycetia{class}(100);Planctomycetales{order}(100);Planctomycetaceae{family}(100);{genus}(100);uncultured_Pasteuria_sp.{species}(100)	Bacteria	Planctomycetes	Planctomycetia	Planctomycetales	Planctomycetaceae		uncultured_Pasteuria_sp.
ASV385	65	48	44	47	191	89	76	182	417	170	29	72	13	46	36	43	21	1589	Bacteria{superkingdom}(82);Bacteroidetes{phylum}(82);Sphingobacteriia{class}(82);Sphingobacteriales{order}(82);Chitinophagaceae{family}(82);{genus}(82);Unassigned{species}(0)	Bacteria	Bacteroidetes	Sphingobacteriia	Sphingobacteriales	Chitinophagaceae		Unassigned
ASV386	173	0	0	0	0	180	98	0	0	0	0	0	0	0	0	0	10	461	Bacteria{superkingdom}(100);Bacteroidetes{phylum}(100);Sphingobacteriia{class}(100);Sphingobacteriales{order}(100);Chitinophagaceae{family}(100);Unassigned{genus}(0);Unassigned{species}(0)	Bacteria	Bacteroidetes	Sphingobacteriia	Sphingobacteriales	Chitinophagaceae	Unassigned	Unassigned
ASV387	81	81	79	36	25	28	49	10	0	43	67	8	67	44	0	0	77	695	Bacteria{superkingdom}(100);Proteobacteria{phylum}(100);Betaproteobacteria{class}(100);{order}(100);{family}(100);{genus}(100);Unassigned{species}(0)	Bacteria	Proteobacteria	Betaproteobacteria				Unassigned
ASV388	82	29	199	24	96	191	90	121	82	49	76	41	321	10	0	8	77	1496	Bacteria{superkingdom}(99);Chloroflexi{phylum}(99);Thermomicrobia{class}(99);Sphaerobacterales{order}(99);Sphaerobacteraceae{family}(99);Unassigned{genus}(0);Unassigned{species}(0)	Bacteria	Chloroflexi	Thermomicrobia	Sphaerobacterales	Sphaerobacteraceae	Unassigned	Unassigned
ASV389	66	10	31	213	149	75	0	13	26	11	0	18	33	0	0	67	0	712	Bacteria{superkingdom}(95);Chloroflexi{phylum}(95);Unassigned{class}(0);Unassigned{order}(0);Unassigned{family}(0);Unassigned{genus}(0);Unassigned{species}(0)	Bacteria	Chloroflexi	Unassigned	Unassigned	Unassigned	Unassigned	Unassigned
ASV390	108	0	134	64	105	0	30	13	30	39	24	58	0	0	0	0	0	605	Bacteria{superkingdom}(96);Proteobacteria{phylum}(96);Betaproteobacteria{class}(96);Burkholderiales{order}(96);Oxalobacteraceae{family}(96);Massilia{genus}(96);Unassigned{species}(0)	Bacteria	Proteobacteria	Betaproteobacteria	Burkholderiales	Oxalobacteraceae	Massilia	Unassigned
ASV391	0	13	0	0	0	0	0	0	0	0	0	0	0	0	0	0	0	13	Bacteria{superkingdom}(94);Bacteroidetes{phylum}(94);Sphingobacteriia{class}(94);Sphingobacteriales{order}(94);Chitinophagaceae{family}(94);Flavitalea{genus}(94);uncultured_Niastella_sp.{species}(94)	Bacteria	Bacteroidetes	Sphingobacteriia	Sphingobacteriales	Chitinophagaceae	Flavitalea	uncultured_Niastella_sp.
ASV392	30	98	52	50	36	0	46	54	0	31	13	78	30	69	62	77	50	776	Bacteria{superkingdom}(100);Proteobacteria{phylum}(100);Alphaproteobacteria{class}(100);Caulobacterales{order}(100);Caulobacteraceae{family}(100);Phenylobacterium{genus}(100);Unassigned{species}(0)	Bacteria	Proteobacteria	Alphaproteobacteria	Caulobacterales	Caulobacteraceae	Phenylobacterium	Unassigned
ASV393	70	13	50	136	115	173	13	51	118	0	17	7	0	0	0	0	0	763	Bacteria{superkingdom}(100);Chloroflexi{phylum}(100);{class}(100);{order}(100);{family}(100);{genus}(100);Unassigned{species}(0)	Bacteria	Chloroflexi					Unassigned
ASV394	22	0	21	64	230	67	5	2	0	0	0	11	453	0	0	0	53	928	Bacteria{superkingdom}(87);Chloroflexi{phylum}(87);Unassigned{class}(0);Unassigned{order}(0);Unassigned{family}(0);Unassigned{genus}(0);Unassigned{species}(0)	Bacteria	Chloroflexi	Unassigned	Unassigned	Unassigned	Unassigned	Unassigned
ASV395	50	0	627	45	0	325	19	0	0	0	0	0	0	0	0	0	0	1066	Bacteria{superkingdom}(100);Unassigned{phylum}(0);Unassigned{class}(0);Unassigned{order}(0);Unassigned{family}(0);Unassigned{genus}(0);Unassigned{species}(0)	Bacteria	Unassigned	Unassigned	Unassigned	Unassigned	Unassigned	Unassigned
ASV396	34	74	27	36	18	62	38	150	35	103	51	49	68	33	123	129	77	1107	Bacteria{superkingdom}(100);Acidobacteria{phylum}(100);Acidobacteria_Gp6{class}(100);{order}(100);{family}(100);Gp6{genus}(100);Unassigned{species}(0)	Bacteria	Acidobacteria	Acidobacteria_Gp6			Gp6	Unassigned
ASV397	69	0	52	0	74	33	150	114	205	205	99	82	256	145	21	81	178	1764	Bacteria{superkingdom}(100);Planctomycetes{phylum}(100);Planctomycetia{class}(100);Planctomycetales{order}(100);Planctomycetaceae{family}(100);Unassigned{genus}(0);Unassigned{species}(0)	Bacteria	Planctomycetes	Planctomycetia	Planctomycetales	Planctomycetaceae	Unassigned	Unassigned
ASV398	0	0	0	72	81	93	0	0	0	85	0	0	42	0	0	0	0	373	Bacteria{superkingdom}(86);Actinobacteria{phylum}(86);Actinobacteria{class}(86);Acidimicrobiales{order}(86);Iamiaceae{family}(86);{genus}(86);Unassigned{species}(0)	Bacteria	Actinobacteria	Actinobacteria	Acidimicrobiales	Iamiaceae		Unassigned
ASV399	0	0	0	29	0	0	0	0	0	137	0	133	0	70	75	292	59	795	Bacteria{superkingdom}(100);Proteobacteria{phylum}(100);Alphaproteobacteria{class}(100);Rhizobiales{order}(100);Methylobacteriaceae{family}(100);Microvirga{genus}(100);Unassigned{species}(0)	Bacteria	Proteobacteria	Alphaproteobacteria	Rhizobiales	Methylobacteriaceae	Microvirga	Unassigned
ASV400	86	33	48	0	85	26	216	94	156	23	23	54	99	21	34	34	82	1114	Bacteria{superkingdom}(93);Proteobacteria{phylum}(93);Alphaproteobacteria{class}(93);Rhizobiales{order}(93);Rhodobiaceae{family}(93);{genus}(93);Unassigned{species}(0)	Bacteria	Proteobacteria	Alphaproteobacteria	Rhizobiales	Rhodobiaceae		Unassigned
ASV401	0	50	0	13	0	0	17	0	0	17	0	19	0	0	0	7	24	147	Bacteria{superkingdom}(95);Proteobacteria{phylum}(95);Alphaproteobacteria{class}(95);Sphingomonadales{order}(95);Erythrobacteraceae{family}(95);Altererythrobacter{genus}(95);Unassigned{species}(0)	Bacteria	Proteobacteria	Alphaproteobacteria	Sphingomonadales	Erythrobacteraceae	Altererythrobacter	Unassigned
ASV402	159	0	0	53	133	69	0	0	0	0	0	0	0	0	0	0	0	414	Bacteria{superkingdom}(100);Actinobacteria{phylum}(100);Actinobacteria{class}(100);Actinomycetales{order}(100);Nocardioidaceae{family}(100);Nocardioides{genus}(100);Unassigned{species}(0)	Bacteria	Actinobacteria	Actinobacteria	Actinomycetales	Nocardioidaceae	Nocardioides	Unassigned
ASV403	79	0	62	112	46	133	87	142	111	166	0	40	97	96	0	41	78	1290	Bacteria{superkingdom}(100);Acidobacteria{phylum}(100);Acidobacteria_Gp6{class}(100);{order}(100);{family}(100);Gp6{genus}(100);Unassigned{species}(0)	Bacteria	Acidobacteria	Acidobacteria_Gp6			Gp6	Unassigned
ASV404	276	0	48	41	0	27	24	170	87	54	26	226	32	34	0	28	105	1178	Bacteria{superkingdom}(89);Actinobacteria{phylum}(89);Actinobacteria{class}(89);Solirubrobacterales{order}(89);Conexibacteraceae{family}(89);Conexibacter{genus}(89);uncultured_bacterium{species}(89)	Bacteria	Actinobacteria	Actinobacteria	Solirubrobacterales	Conexibacteraceae	Conexibacter	uncultured_bacterium
ASV406	47	0	28	106	0	319	27	0	0	0	19	0	0	0	0	0	0	546	Bacteria{superkingdom}(86);Actinobacteria{phylum}(86);Actinobacteria{class}(86);Actinomycetales{order}(86);Nocardioidaceae{family}(86);{genus}(86);Unassigned{species}(0)	Bacteria	Actinobacteria	Actinobacteria	Actinomycetales	Nocardioidaceae		Unassigned
ASV407	42	0	70	36	109	16	0	0	0	0	0	0	28	27	31	0	26	385	Bacteria{superkingdom}(100);Bacteroidetes{phylum}(100);Sphingobacteriia{class}(100);Sphingobacteriales{order}(100);Sphingobacteriaceae{family}(100);Pedobacter{genus}(100);Unassigned{species}(0)	Bacteria	Bacteroidetes	Sphingobacteriia	Sphingobacteriales	Sphingobacteriaceae	Pedobacter	Unassigned
ASV408	16	0	76	23	32	77	69	0	0	0	32	0	1034	1098	243	66	82	2848	Bacteria{superkingdom}(100);Actinobacteria{phylum}(100);Actinobacteria{class}(100);Solirubrobacterales{order}(100);Unassigned{family}(0);Unassigned{genus}(0);Unassigned{species}(0)	Bacteria	Actinobacteria	Actinobacteria	Solirubrobacterales	Unassigned	Unassigned	Unassigned
ASV409	41	23	115	105	115	117	95	55	23	126	0	0	0	0	0	0	29	844	Bacteria{superkingdom}(100);Proteobacteria{phylum}(100);Alphaproteobacteria{class}(100);Rhodospirillales{order}(100);{family}(100);Reyranella{genus}(100);Unassigned{species}(0)	Bacteria	Proteobacteria	Alphaproteobacteria	Rhodospirillales		Reyranella	Unassigned
ASV411	50	201	18	89	28	0	0	0	0	21	0	0	0	0	0	0	0	407	Bacteria{superkingdom}(80);Acidobacteria{phylum}(80);Acidobacteria_Gp10{class}(80);{order}(80);{family}(80);Gp10{genus}(80);uncultured_Pelobacter_sp.{species}(80)	Bacteria	Acidobacteria	Acidobacteria_Gp10			Gp10	uncultured_Pelobacter_sp.
ASV412	0	0	13	0	0	66	0	0	0	0	0	0	0	0	0	0	0	79	Bacteria{superkingdom}(100);Bacteroidetes{phylum}(100);Cytophagia{class}(100);Cytophagales{order}(100);{family}(100);Ohtaekwangia{genus}(100);Unassigned{species}(0)	Bacteria	Bacteroidetes	Cytophagia	Cytophagales		Ohtaekwangia	Unassigned
ASV413	0	0	29	0	103	59	15	0	0	0	8	0	12	0	0	0	0	226	Bacteria{superkingdom}(99);Bacteroidetes{phylum}(99);Sphingobacteriia{class}(99);Sphingobacteriales{order}(99);Chitinophagaceae{family}(99);Terrimonas{genus}(99);Unassigned{species}(0)	Bacteria	Bacteroidetes	Sphingobacteriia	Sphingobacteriales	Chitinophagaceae	Terrimonas	Unassigned
ASV414	119	10	117	105	110	15	2	0	4	0	0	16	0	22	0	0	31	551	Bacteria{superkingdom}(100);Planctomycetes{phylum}(100);Planctomycetia{class}(100);Planctomycetales{order}(100);Planctomycetaceae{family}(100);{genus}(100);Unassigned{species}(0)	Bacteria	Planctomycetes	Planctomycetia	Planctomycetales	Planctomycetaceae		Unassigned
ASV415	67	602	0	0	0	98	58	0	0	0	0	0	0	0	0	0	0	825	Bacteria{superkingdom}(100);Acidobacteria{phylum}(100);Acidobacteria_Gp4{class}(100);{order}(100);{family}(100);Gp4{genus}(100);Unassigned{species}(0)	Bacteria	Acidobacteria	Acidobacteria_Gp4			Gp4	Unassigned
ASV416	141	0	121	48	90	71	0	0	22	42	0	80	147	0	73	21	68	924	Bacteria{superkingdom}(100);Acidobacteria{phylum}(100);Acidobacteria_Gp6{class}(100);{order}(100);{family}(100);Gp6{genus}(100);Unassigned{species}(0)	Bacteria	Acidobacteria	Acidobacteria_Gp6			Gp6	Unassigned
ASV417	20	0	0	36	174	40	0	16	0	39	0	0	30	0	0	0	0	355	Bacteria{superkingdom}(100);Proteobacteria{phylum}(100);Gammaproteobacteria{class}(100);{order}(100);{family}(100);{genus}(100);Unassigned{species}(0)	Bacteria	Proteobacteria	Gammaproteobacteria				Unassigned
ASV418	105	23	109	94	0	100	0	0	0	0	0	67	0	190	0	23	0	711	Bacteria{superkingdom}(94);Chloroflexi{phylum}(94);Thermomicrobia{class}(94);Sphaerobacterales{order}(94);Sphaerobacteraceae{family}(94);{genus}(94);uncultured_Thermomicrobium_sp.{species}(94)	Bacteria	Chloroflexi	Thermomicrobia	Sphaerobacterales	Sphaerobacteraceae		uncultured_Thermomicrobium_sp.
ASV419	81	50	61	129	92	161	12	0	49	5	0	0	24	44	89	45	67	909	Bacteria{superkingdom}(100);Proteobacteria{phylum}(100);Alphaproteobacteria{class}(100);Caulobacterales{order}(100);Caulobacteraceae{family}(100);Phenylobacterium{genus}(100);Unassigned{species}(0)	Bacteria	Proteobacteria	Alphaproteobacteria	Caulobacterales	Caulobacteraceae	Phenylobacterium	Unassigned
ASV420	58	31	16	19	207	96	20	0	31	51	0	27	51	15	0	0	38	660	Bacteria{superkingdom}(93);Planctomycetes{phylum}(93);Planctomycetia{class}(93);Planctomycetales{order}(93);Planctomycetaceae{family}(93);{genus}(93);Planctomyces_sp.{species}(93)	Bacteria	Planctomycetes	Planctomycetia	Planctomycetales	Planctomycetaceae		Planctomyces_sp.
ASV421	0	0	0	0	0	0	0	0	0	0	0	16	0	0	0	0	0	16	Bacteria{superkingdom}(100);Chloroflexi{phylum}(100);Chloroflexia{class}(100);Kallotenuales{order}(100);Kallotenuaceae{family}(100);Kallotenue{genus}(100);Unassigned{species}(0)	Bacteria	Chloroflexi	Chloroflexia	Kallotenuales	Kallotenuaceae	Kallotenue	Unassigned
ASV422	76	94	98	49	106	93	26	0	0	0	53	0	86	0	0	0	50	731	Bacteria{superkingdom}(100);Bacteroidetes{phylum}(100);Cytophagia{class}(100);Cytophagales{order}(100);{family}(100);Ohtaekwangia{genus}(100);Unassigned{species}(0)	Bacteria	Bacteroidetes	Cytophagia	Cytophagales		Ohtaekwangia	Unassigned
ASV423	76	0	19	0	25	0	38	0	28	55	90	46	679	1115	46	226	825	3268	Bacteria{superkingdom}(93);Actinobacteria{phylum}(93);Actinobacteria{class}(93);Solirubrobacterales{order}(93);Conexibacteraceae{family}(93);Conexibacter{genus}(93);Unassigned{species}(0)	Bacteria	Actinobacteria	Actinobacteria	Solirubrobacterales	Conexibacteraceae	Conexibacter	Unassigned
ASV424	0	105	27	61	76	0	28	24	132	0	0	66	34	48	130	68	60	859	Bacteria{superkingdom}(100);Proteobacteria{phylum}(100);Betaproteobacteria{class}(100);Burkholderiales{order}(100);Comamonadaceae{family}(100);Unassigned{genus}(0);Unassigned{species}(0)	Bacteria	Proteobacteria	Betaproteobacteria	Burkholderiales	Comamonadaceae	Unassigned	Unassigned
ASV425	123	50	0	34	16	35	0	34	0	30	0	30	51	51	47	68	59	628	Bacteria{superkingdom}(100);Actinobacteria{phylum}(100);Actinobacteria{class}(100);Actinomycetales{order}(100);Sporichthyaceae{family}(100);Sporichthya{genus}(100);Unassigned{species}(0)	Bacteria	Actinobacteria	Actinobacteria	Actinomycetales	Sporichthyaceae	Sporichthya	Unassigned
ASV426	47	20	42	100	54	60	17	95	29	177	17	18	9	0	38	0	52	775	Bacteria{superkingdom}(95);Chloroflexi{phylum}(95);{class}(95);{order}(95);{family}(95);{genus}(95);Unassigned{species}(0)	Bacteria	Chloroflexi					Unassigned
ASV427	0	0	31	0	52	0	18	69	170	190	107	276	201	94	104	35	233	1580	Bacteria{superkingdom}(100);Proteobacteria{phylum}(100);Betaproteobacteria{class}(100);Burkholderiales{order}(100);Oxalobacteraceae{family}(100);Unassigned{genus}(0);Unassigned{species}(0)	Bacteria	Proteobacteria	Betaproteobacteria	Burkholderiales	Oxalobacteraceae	Unassigned	Unassigned
ASV428	76	28	136	104	44	104	333	267	96	0	204	0	0	0	0	26	58	1476	Bacteria{superkingdom}(100);Actinobacteria{phylum}(100);Unassigned{class}(0);Unassigned{order}(0);Unassigned{family}(0);Unassigned{genus}(0);Unassigned{species}(0)	Bacteria	Actinobacteria	Unassigned	Unassigned	Unassigned	Unassigned	Unassigned
ASV429	77	17	179	109	44	114	18	0	0	14	0	19	47	142	105	56	37	978	Bacteria{superkingdom}(90);Actinobacteria{phylum}(90);Actinobacteria{class}(90);Solirubrobacterales{order}(90);{family}(90);{genus}(90);Unassigned{species}(0)	Bacteria	Actinobacteria	Actinobacteria	Solirubrobacterales			Unassigned
ASV430	70	0	38	103	109	110	0	0	0	0	0	66	140	25	0	0	0	661	Bacteria{superkingdom}(85);Proteobacteria{phylum}(85);Betaproteobacteria{class}(85);{order}(85);{family}(85);{genus}(85);uncultured_Alcaligenaceae_bacterium{species}(85)	Bacteria	Proteobacteria	Betaproteobacteria				uncultured_Alcaligenaceae_bacterium
ASV431	59	5	0	99	29	155	0	0	0	0	0	0	95	47	0	278	0	767	Bacteria{superkingdom}(98);Proteobacteria{phylum}(98);Alphaproteobacteria{class}(98);Rhodospirillales{order}(98);Rhodospirillaceae{family}(98);Dongia{genus}(98);Unassigned{species}(0)	Bacteria	Proteobacteria	Alphaproteobacteria	Rhodospirillales	Rhodospirillaceae	Dongia	Unassigned
ASV432	0	2654	7	36	0	30	0	0	0	0	0	0	28	0	36	11	8	2810	Bacteria{superkingdom}(99);Proteobacteria{phylum}(99);Gammaproteobacteria{class}(99);Pseudomonadales{order}(99);Pseudomonadaceae{family}(99);Azotobacter{genus}(99);Unassigned{species}(0)	Bacteria	Proteobacteria	Gammaproteobacteria	Pseudomonadales	Pseudomonadaceae	Azotobacter	Unassigned
ASV433	64	0	56	63	130	215	60	0	108	0	0	80	153	0	0	0	87	1016	Bacteria{superkingdom}(96);Actinobacteria{phylum}(96);{class}(96);{order}(96);{family}(96);{genus}(96);uncultured_Rubrobacteridae_bacterium{species}(96)	Bacteria	Actinobacteria					uncultured_Rubrobacteridae_bacterium
ASV434	122	125	124	0	25	100	0	0	0	0	0	0	0	0	0	0	0	496	Bacteria{superkingdom}(100);Actinobacteria{phylum}(100);Actinobacteria{class}(100);Actinomycetales{order}(100);Pseudonocardiaceae{family}(100);Pseudonocardia{genus}(100);Unassigned{species}(0)	Bacteria	Actinobacteria	Actinobacteria	Actinomycetales	Pseudonocardiaceae	Pseudonocardia	Unassigned
ASV435	121	15	95	92	144	85	23	11	10	14	0	0	5	26	17	14	0	672	Bacteria{superkingdom}(86);Actinobacteria{phylum}(86);Actinobacteria{class}(86);Acidimicrobiales{order}(86);{family}(86);{genus}(86);uncultured_Rhodococcus_sp.{species}(86)	Bacteria	Actinobacteria	Actinobacteria	Acidimicrobiales			uncultured_Rhodococcus_sp.
ASV436	174	0	147	38	305	285	0	0	0	0	0	117	0	0	0	0	0	1066	Bacteria{superkingdom}(100);Verrucomicrobia{phylum}(100);Opitutae{class}(100);Opitutales{order}(100);Opitutaceae{family}(100);Opitutus{genus}(100);Unassigned{species}(0)	Bacteria	Verrucomicrobia	Opitutae	Opitutales	Opitutaceae	Opitutus	Unassigned
ASV437	77	352	55	17	60	27	40	0	0	0	27	54	0	20	46	26	0	801	Bacteria{superkingdom}(100);Bacteroidetes{phylum}(100);Sphingobacteriia{class}(100);Sphingobacteriales{order}(100);Chitinophagaceae{family}(100);Flavitalea{genus}(100);Unassigned{species}(0)	Bacteria	Bacteroidetes	Sphingobacteriia	Sphingobacteriales	Chitinophagaceae	Flavitalea	Unassigned
ASV438	0	252	30	0	0	0	62	0	1736	124	0	0	88	0	0	0	0	2292	Bacteria{superkingdom}(100);Bacteroidetes{phylum}(100);Sphingobacteriia{class}(100);Sphingobacteriales{order}(100);Chitinophagaceae{family}(100);Unassigned{genus}(0);Unassigned{species}(0)	Bacteria	Bacteroidetes	Sphingobacteriia	Sphingobacteriales	Chitinophagaceae	Unassigned	Unassigned
ASV439	0	0	0	0	18	0	0	75	109	169	21	146	519	571	1301	0	0	2929	Bacteria{superkingdom}(100);Bacteroidetes{phylum}(100);Sphingobacteriia{class}(100);Sphingobacteriales{order}(100);Chitinophagaceae{family}(100);Unassigned{genus}(0);Unassigned{species}(0)	Bacteria	Bacteroidetes	Sphingobacteriia	Sphingobacteriales	Chitinophagaceae	Unassigned	Unassigned
ASV440	47	0	17	67	70	188	45	17	56	33	22	86	167	130	36	41	19	1041	Bacteria{superkingdom}(94);Actinobacteria{phylum}(94);Actinobacteria{class}(94);Actinomycetales{order}(94);Micromonosporaceae{family}(94);Catelliglobosispora{genus}(94);Unassigned{species}(0)	Bacteria	Actinobacteria	Actinobacteria	Actinomycetales	Micromonosporaceae	Catelliglobosispora	Unassigned
ASV441	97	0	107	66	81	65	154	26	77	33	33	32	18	15	12	6	29	851	Bacteria{superkingdom}(95);Acidobacteria{phylum}(95);Acidobacteria_Gp6{class}(95);{order}(95);{family}(95);Gp6{genus}(95);agricultural_soil_bacterium_SC-I-9{species}(95)	Bacteria	Acidobacteria	Acidobacteria_Gp6			Gp6	agricultural_soil_bacterium_SC-I-9
ASV442	17	0	0	39	25	429	0	0	0	0	0	0	0	0	0	0	0	510	Bacteria{superkingdom}(100);Proteobacteria{phylum}(100);Gammaproteobacteria{class}(100);Xanthomonadales{order}(100);Xanthomonadaceae{family}(100);Pseudofulvimonas{genus}(100);Unassigned{species}(0)	Bacteria	Proteobacteria	Gammaproteobacteria	Xanthomonadales	Xanthomonadaceae	Pseudofulvimonas	Unassigned
ASV443	0	0	44	0	128	85	0	0	0	0	0	0	0	0	0	0	0	257	Bacteria{superkingdom}(100);Planctomycetes{phylum}(100);Planctomycetia{class}(100);Planctomycetales{order}(100);Planctomycetaceae{family}(100);Unassigned{genus}(0);Unassigned{species}(0)	Bacteria	Planctomycetes	Planctomycetia	Planctomycetales	Planctomycetaceae	Unassigned	Unassigned
ASV444	133	0	563	27	0	0	0	0	0	23	0	0	49	0	0	0	0	795	Bacteria{superkingdom}(94);Bacteroidetes{phylum}(94);Sphingobacteriia{class}(94);Sphingobacteriales{order}(94);Chitinophagaceae{family}(94);Taibaiella{genus}(94);uncultured_bacterium{species}(94)	Bacteria	Bacteroidetes	Sphingobacteriia	Sphingobacteriales	Chitinophagaceae	Taibaiella	uncultured_bacterium
ASV445	84	0	71	67	37	58	0	0	0	24	0	0	110	32	84	72	46	685	Bacteria{superkingdom}(97);Planctomycetes{phylum}(97);Planctomycetia{class}(97);Planctomycetales{order}(97);Planctomycetaceae{family}(97);Blastopirellula{genus}(97);uncultured_bacterium{species}(97)	Bacteria	Planctomycetes	Planctomycetia	Planctomycetales	Planctomycetaceae	Blastopirellula	uncultured_bacterium
ASV447	55	10	51	36	53	52	36	0	28	28	34	24	40	0	0	0	0	447	Bacteria{superkingdom}(95);Proteobacteria{phylum}(95);Alphaproteobacteria{class}(95);Rhizobiales{order}(95);{family}(95);{genus}(95);uncultured_Methylocystis_sp.{species}(95)	Bacteria	Proteobacteria	Alphaproteobacteria	Rhizobiales			uncultured_Methylocystis_sp.
ASV448	0	12	71	55	62	116	17	23	25	22	0	0	0	0	0	0	0	403	Bacteria{superkingdom}(85);Verrucomicrobia{phylum}(85);Opitutae{class}(85);Opitutales{order}(85);Opitutaceae{family}(85);Opitutus{genus}(85);uncultured_Opitutaceae_bacterium{species}(85)	Bacteria	Verrucomicrobia	Opitutae	Opitutales	Opitutaceae	Opitutus	uncultured_Opitutaceae_bacterium
ASV449	0	170	0	0	0	0	0	0	0	75	0	0	0	0	0	0	0	245	Bacteria{superkingdom}(100);Acidobacteria{phylum}(100);Acidobacteria_Gp4{class}(100);{order}(100);{family}(100);Gp4{genus}(100);Unassigned{species}(0)	Bacteria	Acidobacteria	Acidobacteria_Gp4			Gp4	Unassigned
ASV450	0	0	0	0	0	0	0	0	0	0	0	0	0	0	0	0	17	17	Bacteria{superkingdom}(95);Bacteroidetes{phylum}(95);Sphingobacteriia{class}(95);Sphingobacteriales{order}(95);Chitinophagaceae{family}(95);Segetibacter{genus}(95);uncultured_bacterium{species}(95)	Bacteria	Bacteroidetes	Sphingobacteriia	Sphingobacteriales	Chitinophagaceae	Segetibacter	uncultured_bacterium
ASV451	58	38	56	67	142	68	0	0	27	17	0	71	97	0	130	0	113	884	Bacteria{superkingdom}(100);Proteobacteria{phylum}(100);Alphaproteobacteria{class}(100);Sphingomonadales{order}(100);Sphingomonadaceae{family}(100);Novosphingobium{genus}(100);Unassigned{species}(0)	Bacteria	Proteobacteria	Alphaproteobacteria	Sphingomonadales	Sphingomonadaceae	Novosphingobium	Unassigned
ASV452	65	140	40	0	31	15	100	49	64	74	22	130	26	37	56	99	45	993	Bacteria{superkingdom}(100);Planctomycetes{phylum}(100);Planctomycetia{class}(100);Planctomycetales{order}(100);Planctomycetaceae{family}(100);Pirellula{genus}(100);Unassigned{species}(0)	Bacteria	Planctomycetes	Planctomycetia	Planctomycetales	Planctomycetaceae	Pirellula	Unassigned
ASV453	47	98	31	0	0	0	0	83	0	49	0	29	0	42	41	64	0	484	Bacteria{superkingdom}(100);Acidobacteria{phylum}(100);Acidobacteria_Gp6{class}(100);{order}(100);{family}(100);Gp6{genus}(100);Unassigned{species}(0)	Bacteria	Acidobacteria	Acidobacteria_Gp6			Gp6	Unassigned
ASV454	10	0	0	0	0	18	0	0	0	0	0	0	0	0	0	0	0	28	Bacteria{superkingdom}(100);Proteobacteria{phylum}(100);Gammaproteobacteria{class}(100);{order}(100);{family}(100);{genus}(100);Unassigned{species}(0)	Bacteria	Proteobacteria	Gammaproteobacteria				Unassigned
ASV455	0	0	0	85	0	0	230	254	95	232	132	57	403	195	76	29	254	2042	Bacteria{superkingdom}(100);Proteobacteria{phylum}(100);Deltaproteobacteria{class}(100);{order}(100);{family}(100);{genus}(100);uncultured_Syntrophobacterales_bacterium{species}(100)	Bacteria	Proteobacteria	Deltaproteobacteria				uncultured_Syntrophobacterales_bacterium
ASV456	0	0	11	0	0	0	87	91	104	156	56	215	72	531	481	27	65	1896	Bacteria{superkingdom}(100);Actinobacteria{phylum}(100);Actinobacteria{class}(100);Actinomycetales{order}(100);Nocardioidaceae{family}(100);Nocardioides{genus}(100);Unassigned{species}(0)	Bacteria	Actinobacteria	Actinobacteria	Actinomycetales	Nocardioidaceae	Nocardioides	Unassigned
ASV457	0	0	0	0	143	0	0	0	0	0	0	0	0	0	0	0	0	143	Bacteria{superkingdom}(100);Bacteroidetes{phylum}(100);Sphingobacteriia{class}(100);Sphingobacteriales{order}(100);Sphingobacteriaceae{family}(100);Sphingobacterium{genus}(100);Unassigned{species}(0)	Bacteria	Bacteroidetes	Sphingobacteriia	Sphingobacteriales	Sphingobacteriaceae	Sphingobacterium	Unassigned
ASV458	0	0	60	53	243	118	42	0	31	40	0	0	0	0	29	0	45	661	Bacteria{superkingdom}(99);Proteobacteria{phylum}(99);Alphaproteobacteria{class}(99);Rhizobiales{order}(99);Rhizobiaceae{family}(99);Shinella{genus}(99);Unassigned{species}(0)	Bacteria	Proteobacteria	Alphaproteobacteria	Rhizobiales	Rhizobiaceae	Shinella	Unassigned
ASV459	72	0	112	99	282	234	0	0	0	0	0	2	3	0	1	2	17	824	Bacteria{superkingdom}(100);Actinobacteria{phylum}(100);Actinobacteria{class}(100);Actinomycetales{order}(100);Microbacteriaceae{family}(100);Unassigned{genus}(0);Unassigned{species}(0)	Bacteria	Actinobacteria	Actinobacteria	Actinomycetales	Microbacteriaceae	Unassigned	Unassigned
ASV460	0	0	0	48	0	128	0	0	0	0	0	0	0	0	0	0	0	176	Bacteria{superkingdom}(100);Proteobacteria{phylum}(100);Alphaproteobacteria{class}(100);Rhizobiales{order}(100);Unassigned{family}(0);Unassigned{genus}(0);Unassigned{species}(0)	Bacteria	Proteobacteria	Alphaproteobacteria	Rhizobiales	Unassigned	Unassigned	Unassigned
ASV461	0	153	0	0	26	0	0	30	345	69	0	174	0	99	140	167	0	1203	Bacteria{superkingdom}(97);Acidobacteria{phylum}(97);Acidobacteria_Gp3{class}(97);{order}(97);{family}(97);Gp3{genus}(97);Unassigned{species}(0)	Bacteria	Acidobacteria	Acidobacteria_Gp3			Gp3	Unassigned
ASV462	38	82	0	26	40	12	0	63	17	55	0	38	33	38	0	75	16	533	Bacteria{superkingdom}(100);Proteobacteria{phylum}(100);Alphaproteobacteria{class}(100);Rhizobiales{order}(100);Hyphomicrobiaceae{family}(100);Unassigned{genus}(0);Unassigned{species}(0)	Bacteria	Proteobacteria	Alphaproteobacteria	Rhizobiales	Hyphomicrobiaceae	Unassigned	Unassigned
ASV463	118	157	194	0	0	130	366	179	120	0	0	94	114	0	0	0	0	1472	Bacteria{superkingdom}(93);Actinobacteria{phylum}(93);Actinobacteria{class}(93);Acidimicrobiales{order}(93);Acidimicrobineae_incertae_sedis{family}(93);Aciditerrimonas{genus}(93);uncultured_Acidimicrobiales_bacterium{species}(93)	Bacteria	Actinobacteria	Actinobacteria	Acidimicrobiales	Acidimicrobineae_incertae_sedis	Aciditerrimonas	uncultured_Acidimicrobiales_bacterium
ASV464	0	200	76	0	0	182	0	0	0	0	0	0	0	37	0	0	0	495	Bacteria{superkingdom}(86);Actinobacteria{phylum}(86);Actinobacteria{class}(86);Solirubrobacterales{order}(86);Conexibacteraceae{family}(86);Conexibacter{genus}(86);uncultured_Thermoleophilum_sp.{species}(86)	Bacteria	Actinobacteria	Actinobacteria	Solirubrobacterales	Conexibacteraceae	Conexibacter	uncultured_Thermoleophilum_sp.
ASV465	0	0	29	333	70	173	0	0	0	21	0	0	0	0	0	0	0	626	Bacteria{superkingdom}(84);Proteobacteria{phylum}(84);Oligoflexia{class}(84);Oligoflexales{order}(84);Oligoflexaceae{family}(84);Oligoflexus{genus}(84);uncultured_bacterium{species}(84)	Bacteria	Proteobacteria	Oligoflexia	Oligoflexales	Oligoflexaceae	Oligoflexus	uncultured_bacterium
ASV466	57	273	24	44	16	19	30	37	49	92	29	107	72	45	137	135	39	1205	Bacteria{superkingdom}(100);Acidobacteria{phylum}(100);Acidobacteria_Gp6{class}(100);{order}(100);{family}(100);Gp6{genus}(100);Unassigned{species}(0)	Bacteria	Acidobacteria	Acidobacteria_Gp6			Gp6	Unassigned
ASV467	46	26	34	62	119	18	26	20	25	22	0	119	37	60	39	47	47	747	Bacteria{superkingdom}(100);Proteobacteria{phylum}(100);Alphaproteobacteria{class}(100);Rhizobiales{order}(100);Hyphomicrobiaceae{family}(100);Devosia{genus}(100);Unassigned{species}(0)	Bacteria	Proteobacteria	Alphaproteobacteria	Rhizobiales	Hyphomicrobiaceae	Devosia	Unassigned
ASV468	39	39	62	96	73	115	0	21	35	25	30	51	58	33	0	168	20	865	Bacteria{superkingdom}(100);Chloroflexi{phylum}(100);Caldilineae{class}(100);Caldilineales{order}(100);Caldilineaceae{family}(100);Litorilinea{genus}(100);Unassigned{species}(0)	Bacteria	Chloroflexi	Caldilineae	Caldilineales	Caldilineaceae	Litorilinea	Unassigned
ASV469	133	244	108	0	0	166	0	0	0	0	0	0	0	0	0	0	0	651	Bacteria{superkingdom}(91);Actinobacteria{phylum}(91);Actinobacteria{class}(91);Solirubrobacterales{order}(91);Conexibacteraceae{family}(91);Conexibacter{genus}(91);uncultured_Thermoleophilum_sp.{species}(91)	Bacteria	Actinobacteria	Actinobacteria	Solirubrobacterales	Conexibacteraceae	Conexibacter	uncultured_Thermoleophilum_sp.
ASV470	59	0	0	0	0	142	0	0	0	0	0	0	0	0	0	0	0	201	Bacteria{superkingdom}(100);Bacteroidetes{phylum}(100);Cytophagia{class}(100);Cytophagales{order}(100);{family}(100);Ohtaekwangia{genus}(100);Unassigned{species}(0)	Bacteria	Bacteroidetes	Cytophagia	Cytophagales		Ohtaekwangia	Unassigned
ASV471	0	0	0	0	0	0	0	4	0	0	0	0	0	616	0	30	0	650	Bacteria{superkingdom}(100);Actinobacteria{phylum}(100);Actinobacteria{class}(100);Actinomycetales{order}(100);Glycomycetaceae{family}(100);Glycomyces{genus}(100);Unassigned{species}(0)	Bacteria	Actinobacteria	Actinobacteria	Actinomycetales	Glycomycetaceae	Glycomyces	Unassigned
ASV472	65	0	51	103	53	43	177	235	100	74	75	0	68	0	0	0	35	1079	Bacteria{superkingdom}(100);Proteobacteria{phylum}(100);Betaproteobacteria{class}(100);{order}(100);{family}(100);{genus}(100);Unassigned{species}(0)	Bacteria	Proteobacteria	Betaproteobacteria				Unassigned
ASV473	74	0	58	82	34	45	53	26	27	14	10	33	51	70	32	34	45	688	Bacteria{superkingdom}(92);Proteobacteria{phylum}(92);Alphaproteobacteria{class}(92);Rhizobiales{order}(92);Phyllobacteriaceae{family}(92);Mesorhizobium{genus}(92);Unassigned{species}(0)	Bacteria	Proteobacteria	Alphaproteobacteria	Rhizobiales	Phyllobacteriaceae	Mesorhizobium	Unassigned
ASV474	85	117	98	80	46	26	61	0	56	65	31	38	0	49	0	50	0	802	Bacteria{superkingdom}(100);Actinobacteria{phylum}(100);Actinobacteria{class}(100);Solirubrobacterales{order}(100);Solirubrobacteraceae{family}(100);Solirubrobacter{genus}(100);Unassigned{species}(0)	Bacteria	Actinobacteria	Actinobacteria	Solirubrobacterales	Solirubrobacteraceae	Solirubrobacter	Unassigned
ASV475	0	36	0	0	0	0	0	0	0	0	0	0	0	0	0	0	0	36	Bacteria{superkingdom}(100);Proteobacteria{phylum}(100);Alphaproteobacteria{class}(100);Rhizobiales{order}(100);Phyllobacteriaceae{family}(100);Mesorhizobium{genus}(100);Unassigned{species}(0)	Bacteria	Proteobacteria	Alphaproteobacteria	Rhizobiales	Phyllobacteriaceae	Mesorhizobium	Unassigned
ASV476	0	29	0	0	0	0	0	0	0	0	0	0	0	0	0	0	0	29	Bacteria{superkingdom}(99);Bacteroidetes{phylum}(99);Sphingobacteriia{class}(99);Sphingobacteriales{order}(99);Chitinophagaceae{family}(99);Segetibacter{genus}(99);uncultured_bacterium{species}(99)	Bacteria	Bacteroidetes	Sphingobacteriia	Sphingobacteriales	Chitinophagaceae	Segetibacter	uncultured_bacterium
ASV478	38	0	0	0	97	0	0	0	0	0	0	0	0	13	0	0	0	148	Bacteria{superkingdom}(80);Bacteroidetes{phylum}(80);Cytophagia{class}(80);Cytophagales{order}(80);{family}(80);Ohtaekwangia{genus}(80);uncultured_Sphingobacteriales_bacterium{species}(80)	Bacteria	Bacteroidetes	Cytophagia	Cytophagales		Ohtaekwangia	uncultured_Sphingobacteriales_bacterium
ASV479	0	280	28	0	28	0	0	0	0	0	0	0	0	0	0	0	0	336	Bacteria{superkingdom}(93);Bacteroidetes{phylum}(93);Sphingobacteriia{class}(93);Sphingobacteriales{order}(93);Chitinophagaceae{family}(93);{genus}(93);Unassigned{species}(0)	Bacteria	Bacteroidetes	Sphingobacteriia	Sphingobacteriales	Chitinophagaceae		Unassigned
ASV480	56	0	48	39	133	139	0	0	0	0	0	0	22	0	0	0	0	437	Bacteria{superkingdom}(100);Proteobacteria{phylum}(100);Alphaproteobacteria{class}(100);Rhizobiales{order}(100);{family}(100);{genus}(100);Unassigned{species}(0)	Bacteria	Proteobacteria	Alphaproteobacteria	Rhizobiales			Unassigned
ASV481	50	0	95	92	0	42	0	0	0	32	39	0	52	0	0	0	71	473	Bacteria{superkingdom}(100);Actinobacteria{phylum}(100);Actinobacteria{class}(100);Actinomycetales{order}(100);Nocardioidaceae{family}(100);Nocardioides{genus}(100);Unassigned{species}(0)	Bacteria	Actinobacteria	Actinobacteria	Actinomycetales	Nocardioidaceae	Nocardioides	Unassigned
ASV482	0	0	0	0	0	0	0	0	0	54	0	0	0	0	0	0	0	54	Bacteria{superkingdom}(99);Actinobacteria{phylum}(99);Actinobacteria{class}(99);Actinomycetales{order}(99);Pseudonocardiaceae{family}(99);Kibdelosporangium{genus}(99);Unassigned{species}(0)	Bacteria	Actinobacteria	Actinobacteria	Actinomycetales	Pseudonocardiaceae	Kibdelosporangium	Unassigned
ASV483	0	0	7	0	0	0	6	0	0	15	0	27	0	0	0	31	0	86	Bacteria{superkingdom}(100);Proteobacteria{phylum}(100);Alphaproteobacteria{class}(100);Rhizobiales{order}(100);Rhizobiaceae{family}(100);Rhizobium{genus}(100);Unassigned{species}(0)	Bacteria	Proteobacteria	Alphaproteobacteria	Rhizobiales	Rhizobiaceae	Rhizobium	Unassigned
ASV484	72	0	130	55	72	101	92	50	68	96	139	133	194	0	0	22	74	1298	Bacteria{superkingdom}(97);Planctomycetes{phylum}(97);Planctomycetia{class}(97);Planctomycetales{order}(97);Planctomycetaceae{family}(97);Pirellula{genus}(97);uncultured_Firmicutes_bacterium{species}(97)	Bacteria	Planctomycetes	Planctomycetia	Planctomycetales	Planctomycetaceae	Pirellula	uncultured_Firmicutes_bacterium
ASV485	63	99	88	38	50	24	272	120	190	139	53	74	91	39	0	0	81	1421	Bacteria{superkingdom}(100);Proteobacteria{phylum}(100);Betaproteobacteria{class}(100);{order}(100);{family}(100);{genus}(100);Unassigned{species}(0)	Bacteria	Proteobacteria	Betaproteobacteria				Unassigned
ASV486	0	0	0	0	0	0	0	0	0	118	106	39	272	23	390	146	233	1327	Bacteria{superkingdom}(100);Bacteroidetes{phylum}(100);Cytophagia{class}(100);Cytophagales{order}(100);Cytophagaceae{family}(100);Adhaeribacter{genus}(100);Unassigned{species}(0)	Bacteria	Bacteroidetes	Cytophagia	Cytophagales	Cytophagaceae	Adhaeribacter	Unassigned
ASV487	97	8	83	105	50	68	0	26	39	7	16	39	24	137	10	126	78	913	Bacteria{superkingdom}(100);Chloroflexi{phylum}(100);Thermomicrobia{class}(100);Unassigned{order}(0);Unassigned{family}(0);Unassigned{genus}(0);Unassigned{species}(0)	Bacteria	Chloroflexi	Thermomicrobia	Unassigned	Unassigned	Unassigned	Unassigned
ASV488	0	0	0	0	6	0	0	0	0	0	0	0	0	0	0	0	0	6	Bacteria{superkingdom}(94);Cyanobacteria/Chloroplast{phylum}(94);Cyanobacteria{class}(94);{order}(94);Family_I{family}(94);GpI{genus}(94);uncultured_Scytonema_sp.{species}(94)	Bacteria	Cyanobacteria/Chloroplast	Cyanobacteria		Family_I	GpI	uncultured_Scytonema_sp.
ASV489	30	7	20	38	68	49	21	0	0	14	0	0	49	0	0	0	24	320	Bacteria{superkingdom}(82);Proteobacteria{phylum}(82);Gammaproteobacteria{class}(82);{order}(82);{family}(82);{genus}(82);uncultured_Steroidobacter_sp.{species}(82)	Bacteria	Proteobacteria	Gammaproteobacteria				uncultured_Steroidobacter_sp.
ASV490	0	0	0	76	0	0	0	0	64	47	0	0	129	0	0	0	0	316	Bacteria{superkingdom}(100);Proteobacteria{phylum}(100);Gammaproteobacteria{class}(100);Xanthomonadales{order}(100);Sinobacteraceae{family}(100);Steroidobacter{genus}(100);Unassigned{species}(0)	Bacteria	Proteobacteria	Gammaproteobacteria	Xanthomonadales	Sinobacteraceae	Steroidobacter	Unassigned
ASV491	0	0	0	0	0	0	0	0	0	0	217	0	0	0	0	0	0	217	Bacteria{superkingdom}(100);Acidobacteria{phylum}(100);Acidobacteria_Gp7{class}(100);{order}(100);{family}(100);Gp7{genus}(100);Unassigned{species}(0)	Bacteria	Acidobacteria	Acidobacteria_Gp7			Gp7	Unassigned
ASV492	0	0	0	18	0	32	0	0	0	0	0	5	0	0	0	0	0	55	Bacteria{superkingdom}(100);Bacteroidetes{phylum}(100);Sphingobacteriia{class}(100);Sphingobacteriales{order}(100);Chitinophagaceae{family}(100);Unassigned{genus}(0);Unassigned{species}(0)	Bacteria	Bacteroidetes	Sphingobacteriia	Sphingobacteriales	Chitinophagaceae	Unassigned	Unassigned
ASV493	0	92	0	15	0	0	0	0	0	0	0	0	0	84	11	0	0	202	Bacteria{superkingdom}(100);Acidobacteria{phylum}(100);Acidobacteria_Gp10{class}(100);{order}(100);{family}(100);Gp10{genus}(100);Unassigned{species}(0)	Bacteria	Acidobacteria	Acidobacteria_Gp10			Gp10	Unassigned
ASV494	0	0	0	27	0	0	0	0	0	0	0	0	0	0	38	76	0	141	Bacteria{superkingdom}(100);Actinobacteria{phylum}(100);Actinobacteria{class}(100);Actinomycetales{order}(100);Pseudonocardiaceae{family}(100);Lentzea{genus}(100);Unassigned{species}(0)	Bacteria	Actinobacteria	Actinobacteria	Actinomycetales	Pseudonocardiaceae	Lentzea	Unassigned
ASV495	34	80	15	23	0	21	16	0	39	66	54	105	267	475	30	86	88	1399	Bacteria{superkingdom}(100);Proteobacteria{phylum}(100);Betaproteobacteria{class}(100);Nitrosomonadales{order}(100);Nitrosomonadaceae{family}(100);Nitrosospira{genus}(100);Unassigned{species}(0)	Bacteria	Proteobacteria	Betaproteobacteria	Nitrosomonadales	Nitrosomonadaceae	Nitrosospira	Unassigned
ASV496	140	0	148	84	58	86	26	0	23	0	0	0	0	0	0	0	0	565	Bacteria{superkingdom}(100);Actinobacteria{phylum}(100);Actinobacteria{class}(100);Actinomycetales{order}(100);Nocardioidaceae{family}(100);Nocardioides{genus}(100);Unassigned{species}(0)	Bacteria	Actinobacteria	Actinobacteria	Actinomycetales	Nocardioidaceae	Nocardioides	Unassigned
ASV498	39	0	17	0	23	0	14	0	0	0	0	0	0	0	0	0	0	93	Bacteria{superkingdom}(84);candidate_division_WPS-1{phylum}(84);{class}(84);{order}(84);{family}(84);WPS-1_genera_incertae_sedis{genus}(84);uncultured_bacterium{species}(84)	Bacteria	candidate_division_WPS-1				WPS-1_genera_incertae_sedis	uncultured_bacterium
ASV499	39	38	65	37	25	107	165	0	0	0	43	35	0	66	84	76	289	1069	Bacteria{superkingdom}(87);Actinobacteria{phylum}(87);Actinobacteria{class}(87);Solirubrobacterales{order}(87);Solirubrobacteraceae{family}(87);Solirubrobacter{genus}(87);uncultured_bacterium{species}(87)	Bacteria	Actinobacteria	Actinobacteria	Solirubrobacterales	Solirubrobacteraceae	Solirubrobacter	uncultured_bacterium
ASV500	192	271	319	0	0	64	0	70	56	0	0	0	0	0	0	207	0	1179	Bacteria{superkingdom}(100);Chloroflexi{phylum}(100);{class}(100);{order}(100);{family}(100);{genus}(100);uncultured_Anaerolineae_bacterium{species}(100)	Bacteria	Chloroflexi					uncultured_Anaerolineae_bacterium
ASV501	0	0	9	70	4	0	0	0	0	0	64	0	3046	883	0	0	22	4098	Bacteria{superkingdom}(84);Acidobacteria{phylum}(84);Acidobacteria_Gp10{class}(84);{order}(84);{family}(84);Gp10{genus}(84);uncultured_Firmicutes_bacterium{species}(84)	Bacteria	Acidobacteria	Acidobacteria_Gp10			Gp10	uncultured_Firmicutes_bacterium
ASV502	33	319	0	89	26	43	7	5	45	37	0	46	190	219	37	185	71	1352	Bacteria{superkingdom}(99);Acidobacteria{phylum}(99);Acidobacteria_Gp4{class}(99);{order}(99);{family}(99);Aridibacter{genus}(99);Unassigned{species}(0)	Bacteria	Acidobacteria	Acidobacteria_Gp4			Aridibacter	Unassigned
ASV503	0	0	140	10	0	263	17	0	0	23	0	0	111	48	15	62	60	749	Bacteria{superkingdom}(91);Proteobacteria{phylum}(91);Deltaproteobacteria{class}(91);Myxococcales{order}(91);Polyangiaceae{family}(91);{genus}(91);Unassigned{species}(0)	Bacteria	Proteobacteria	Deltaproteobacteria	Myxococcales	Polyangiaceae		Unassigned
ASV504	46	0	39	423	141	128	0	0	0	0	13	0	30	0	11	0	0	831	Bacteria{superkingdom}(85);Proteobacteria{phylum}(85);Gammaproteobacteria{class}(85);Xanthomonadales{order}(85);Sinobacteraceae{family}(85);Povalibacter{genus}(85);uncultured_bacterium{species}(85)	Bacteria	Proteobacteria	Gammaproteobacteria	Xanthomonadales	Sinobacteraceae	Povalibacter	uncultured_bacterium
ASV505	68	38	0	140	55	122	0	0	0	0	0	0	175	0	0	0	0	598	Bacteria{superkingdom}(100);Proteobacteria{phylum}(100);Betaproteobacteria{class}(100);Burkholderiales{order}(100);Oxalobacteraceae{family}(100);Unassigned{genus}(0);Unassigned{species}(0)	Bacteria	Proteobacteria	Betaproteobacteria	Burkholderiales	Oxalobacteraceae	Unassigned	Unassigned
ASV506	0	0	51	81	150	63	0	0	0	0	0	0	0	0	0	0	0	345	Bacteria{superkingdom}(97);Proteobacteria{phylum}(97);Alphaproteobacteria{class}(97);Rhizobiales{order}(97);Hyphomicrobiaceae{family}(97);Devosia{genus}(97);Unassigned{species}(0)	Bacteria	Proteobacteria	Alphaproteobacteria	Rhizobiales	Hyphomicrobiaceae	Devosia	Unassigned
ASV507	92	0	51	67	111	97	0	22	18	11	0	31	118	59	109	0	38	824	Bacteria{superkingdom}(100);Proteobacteria{phylum}(100);Alphaproteobacteria{class}(100);Rhizobiales{order}(100);Unassigned{family}(0);Unassigned{genus}(0);Unassigned{species}(0)	Bacteria	Proteobacteria	Alphaproteobacteria	Rhizobiales	Unassigned	Unassigned	Unassigned
ASV508	0	72	41	53	0	36	106	144	123	103	50	0	66	35	62	0	70	961	Bacteria{superkingdom}(98);Acidobacteria{phylum}(98);Acidobacteria_Gp6{class}(98);{order}(98);{family}(98);Gp6{genus}(98);Unassigned{species}(0)	Bacteria	Acidobacteria	Acidobacteria_Gp6			Gp6	Unassigned
ASV509	28	14	28	25	125	91	9	14	9	0	0	0	17	0	15	0	16	391	Bacteria{superkingdom}(100);Proteobacteria{phylum}(100);Alphaproteobacteria{class}(100);Rhizobiales{order}(100);Xanthobacteraceae{family}(100);Unassigned{genus}(0);Unassigned{species}(0)	Bacteria	Proteobacteria	Alphaproteobacteria	Rhizobiales	Xanthobacteraceae	Unassigned	Unassigned
ASV510	80	0	26	68	0	40	6	66	14	0	0	158	152	68	0	76	48	802	Bacteria{superkingdom}(99);Chloroflexi{phylum}(99);Thermomicrobia{class}(99);Sphaerobacterales{order}(99);Sphaerobacteraceae{family}(99);Unassigned{genus}(0);Unassigned{species}(0)	Bacteria	Chloroflexi	Thermomicrobia	Sphaerobacterales	Sphaerobacteraceae	Unassigned	Unassigned
ASV511	77	48	79	25	96	34	30	103	79	49	24	13	89	9	0	9	113	877	Bacteria{superkingdom}(100);Chloroflexi{phylum}(100);Caldilineae{class}(100);Caldilineales{order}(100);Caldilineaceae{family}(100);Litorilinea{genus}(100);Unassigned{species}(0)	Bacteria	Chloroflexi	Caldilineae	Caldilineales	Caldilineaceae	Litorilinea	Unassigned
ASV512	83	210	72	35	51	127	47	0	41	43	0	33	0	0	0	0	0	742	Bacteria{superkingdom}(100);Actinobacteria{phylum}(100);Unassigned{class}(0);Unassigned{order}(0);Unassigned{family}(0);Unassigned{genus}(0);Unassigned{species}(0)	Bacteria	Actinobacteria	Unassigned	Unassigned	Unassigned	Unassigned	Unassigned
ASV513	33	15	11	4	13	26	2	7	9	0	0	4	0	6	1	3	4	138	Bacteria{superkingdom}(96);Proteobacteria{phylum}(96);Alphaproteobacteria{class}(96);Rhizobiales{order}(96);Rhizobiales_incertae_sedis{family}(96);Vasilyevaea{genus}(96);uncultured_bacterium{species}(96)	Bacteria	Proteobacteria	Alphaproteobacteria	Rhizobiales	Rhizobiales_incertae_sedis	Vasilyevaea	uncultured_bacterium
ASV514	171	0	30	0	0	0	0	0	0	52	0	459	0	0	0	0	106	818	Bacteria{superkingdom}(84);Acidobacteria{phylum}(84);Acidobacteria_Gp7{class}(84);{order}(84);{family}(84);Gp7{genus}(84);uncultured_soil_bacterium{species}(84)	Bacteria	Acidobacteria	Acidobacteria_Gp7			Gp7	uncultured_soil_bacterium
ASV515	40	20	0	8	39	80	0	0	0	0	0	0	0	0	0	0	0	187	Bacteria{superkingdom}(100);Acidobacteria{phylum}(100);Acidobacteria_Gp3{class}(100);{order}(100);{family}(100);{genus}(100);Acidobacteria_bacterium_IGE-016{species}(100)	Bacteria	Acidobacteria	Acidobacteria_Gp3				Acidobacteria_bacterium_IGE-016
ASV516	67	21	71	82	41	124	111	0	67	173	0	42	20	0	63	97	55	1034	Bacteria{superkingdom}(99);Gemmatimonadetes{phylum}(99);Gemmatimonadetes{class}(99);Gemmatimonadales{order}(99);Gemmatimonadaceae{family}(99);Gemmatimonas{genus}(99);Unassigned{species}(0)	Bacteria	Gemmatimonadetes	Gemmatimonadetes	Gemmatimonadales	Gemmatimonadaceae	Gemmatimonas	Unassigned
ASV518	207	90	78	218	437	226	36	17	0	19	0	0	84	0	9	0	49	1470	Bacteria{superkingdom}(90);Proteobacteria{phylum}(90);Gammaproteobacteria{class}(90);Xanthomonadales{order}(90);Sinobacteraceae{family}(90);Steroidobacter{genus}(90);uncultured_gamma_proteobacterium{species}(90)	Bacteria	Proteobacteria	Gammaproteobacteria	Xanthomonadales	Sinobacteraceae	Steroidobacter	uncultured_gamma_proteobacterium
ASV519	70	237	81	22	0	29	0	0	0	26	0	0	0	0	0	0	0	465	Bacteria{superkingdom}(89);Acidobacteria{phylum}(89);Acidobacteria_Gp4{class}(89);{order}(89);{family}(89);Gp4{genus}(89);uncultured_Rhodopseudomonas_sp.{species}(89)	Bacteria	Acidobacteria	Acidobacteria_Gp4			Gp4	uncultured_Rhodopseudomonas_sp.
ASV520	0	0	0	0	0	0	0	0	0	4260	0	0	0	0	0	0	0	4260	Bacteria{superkingdom}(99);Acidobacteria{phylum}(99);Acidobacteria_Gp4{class}(99);{order}(99);{family}(99);Gp4{genus}(99);Unassigned{species}(0)	Bacteria	Acidobacteria	Acidobacteria_Gp4			Gp4	Unassigned
ASV521	0	65	74	0	19	34	35	0	0	0	0	0	0	0	0	0	0	227	Bacteria{superkingdom}(100);Acidobacteria{phylum}(100);Acidobacteria_Gp6{class}(100);{order}(100);{family}(100);Gp6{genus}(100);Unassigned{species}(0)	Bacteria	Acidobacteria	Acidobacteria_Gp6			Gp6	Unassigned
ASV522	58	87	88	45	40	48	161	64	211	64	86	33	4	16	0	0	280	1285	Bacteria{superkingdom}(99);Actinobacteria{phylum}(99);Actinobacteria{class}(99);Unassigned{order}(0);Unassigned{family}(0);Unassigned{genus}(0);Unassigned{species}(0)	Bacteria	Actinobacteria	Actinobacteria	Unassigned	Unassigned	Unassigned	Unassigned
ASV523	161	39	114	15	42	149	52	14	0	5	0	21	0	18	0	53	21	704	Bacteria{superkingdom}(100);Planctomycetes{phylum}(100);Planctomycetia{class}(100);Planctomycetales{order}(100);Planctomycetaceae{family}(100);Pirellula{genus}(100);Unassigned{species}(0)	Bacteria	Planctomycetes	Planctomycetia	Planctomycetales	Planctomycetaceae	Pirellula	Unassigned
ASV524	116	30	0	67	36	103	78	0	0	0	0	0	0	29	0	0	0	459	Bacteria{superkingdom}(100);Bacteroidetes{phylum}(100);Sphingobacteriia{class}(100);Sphingobacteriales{order}(100);Chitinophagaceae{family}(100);Niastella{genus}(100);Unassigned{species}(0)	Bacteria	Bacteroidetes	Sphingobacteriia	Sphingobacteriales	Chitinophagaceae	Niastella	Unassigned
ASV525	73	0	15	23	359	134	0	0	19	0	0	0	27	0	0	0	0	650	Bacteria{superkingdom}(100);Planctomycetes{phylum}(100);Planctomycetia{class}(100);Planctomycetales{order}(100);Planctomycetaceae{family}(100);Pirellula{genus}(100);Unassigned{species}(0)	Bacteria	Planctomycetes	Planctomycetia	Planctomycetales	Planctomycetaceae	Pirellula	Unassigned
ASV526	254	0	0	0	60	0	0	0	0	0	0	89	0	17	67	45	18	550	Bacteria{superkingdom}(100);Actinobacteria{phylum}(100);Actinobacteria{class}(100);Actinomycetales{order}(100);Microbacteriaceae{family}(100);Microbacterium{genus}(100);Unassigned{species}(0)	Bacteria	Actinobacteria	Actinobacteria	Actinomycetales	Microbacteriaceae	Microbacterium	Unassigned
ASV527	83	0	74	0	20	74	45	28	0	39	0	0	16	0	0	63	0	442	Bacteria{superkingdom}(100);Actinobacteria{phylum}(100);Unassigned{class}(0);Unassigned{order}(0);Unassigned{family}(0);Unassigned{genus}(0);Unassigned{species}(0)	Bacteria	Actinobacteria	Unassigned	Unassigned	Unassigned	Unassigned	Unassigned
ASV528	88	0	0	108	33	0	0	61	58	193	100	211	0	53	60	62	0	1027	Bacteria{superkingdom}(100);Actinobacteria{phylum}(100);Actinobacteria{class}(100);Actinomycetales{order}(100);Nocardioidaceae{family}(100);Nocardioides{genus}(100);Unassigned{species}(0)	Bacteria	Actinobacteria	Actinobacteria	Actinomycetales	Nocardioidaceae	Nocardioides	Unassigned
ASV529	200	0	27	76	9	113	0	0	7	27	0	58	0	105	0	33	0	655	Bacteria{superkingdom}(81);Chloroflexi{phylum}(81);Thermomicrobia{class}(81);Sphaerobacterales{order}(81);Sphaerobacteraceae{family}(81);Nitrolancea{genus}(81);uncultured_bacterium{species}(81)	Bacteria	Chloroflexi	Thermomicrobia	Sphaerobacterales	Sphaerobacteraceae	Nitrolancea	uncultured_bacterium
ASV530	0	0	0	6	0	0	0	0	0	0	0	0	0	0	0	0	0	6	Bacteria{superkingdom}(100);Proteobacteria{phylum}(100);Alphaproteobacteria{class}(100);Caulobacterales{order}(100);Caulobacteraceae{family}(100);Unassigned{genus}(0);Unassigned{species}(0)	Bacteria	Proteobacteria	Alphaproteobacteria	Caulobacterales	Caulobacteraceae	Unassigned	Unassigned
ASV531	95	0	199	136	68	115	28	26	23	126	0	42	56	68	62	0	30	1074	Bacteria{superkingdom}(100);Actinobacteria{phylum}(100);Actinobacteria{class}(100);Actinomycetales{order}(100);Nocardioidaceae{family}(100);Nocardioides{genus}(100);Unassigned{species}(0)	Bacteria	Actinobacteria	Actinobacteria	Actinomycetales	Nocardioidaceae	Nocardioides	Unassigned
ASV532	66	0	114	0	186	117	0	0	0	0	0	0	0	0	0	0	0	483	Bacteria{superkingdom}(100);Chloroflexi{phylum}(100);Thermomicrobia{class}(100);Sphaerobacterales{order}(100);Sphaerobacteraceae{family}(100);{genus}(100);Unassigned{species}(0)	Bacteria	Chloroflexi	Thermomicrobia	Sphaerobacterales	Sphaerobacteraceae		Unassigned
ASV533	0	0	7	20	0	0	0	0	0	0	0	20	0	0	0	0	0	47	Bacteria{superkingdom}(100);Proteobacteria{phylum}(100);Betaproteobacteria{class}(100);Burkholderiales{order}(100);Oxalobacteraceae{family}(100);Massilia{genus}(100);Unassigned{species}(0)	Bacteria	Proteobacteria	Betaproteobacteria	Burkholderiales	Oxalobacteraceae	Massilia	Unassigned
ASV534	0	0	32	26	19	0	31	81	34	137	78	146	164	62	340	82	74	1306	Bacteria{superkingdom}(100);Proteobacteria{phylum}(100);Betaproteobacteria{class}(100);Burkholderiales{order}(100);Comamonadaceae{family}(100);Unassigned{genus}(0);Unassigned{species}(0)	Bacteria	Proteobacteria	Betaproteobacteria	Burkholderiales	Comamonadaceae	Unassigned	Unassigned
ASV535	91	0	121	0	59	119	307	119	201	0	23	29	0	0	0	0	36	1105	Bacteria{superkingdom}(80);Chloroflexi{phylum}(80);{class}(80);{order}(80);{family}(80);{genus}(80);uncultured_soil_bacterium{species}(80)	Bacteria	Chloroflexi					uncultured_soil_bacterium
ASV537	124	0	67	0	0	0	227	14	15	31	0	12	0	0	0	0	0	490	Bacteria{superkingdom}(100);Proteobacteria{phylum}(100);Alphaproteobacteria{class}(100);{order}(100);{family}(100);{genus}(100);Unassigned{species}(0)	Bacteria	Proteobacteria	Alphaproteobacteria				Unassigned
ASV538	42	0	47	81	52	77	34	0	0	0	0	0	43	0	0	0	49	425	Bacteria{superkingdom}(100);Armatimonadetes{phylum}(100);Chthonomonadetes{class}(100);Chthonomonadales{order}(100);Chthonomonadaceae{family}(100);Chthonomonas/Armatimonadetes_gp3{genus}(100);Unassigned{species}(0)	Bacteria	Armatimonadetes	Chthonomonadetes	Chthonomonadales	Chthonomonadaceae	Chthonomonas/Armatimonadetes_gp3	Unassigned
ASV539	182	0	44	75	67	81	0	0	0	0	0	0	0	0	0	0	0	449	Bacteria{superkingdom}(92);Actinobacteria{phylum}(92);Actinobacteria{class}(92);Actinomycetales{order}(92);Pseudonocardiaceae{family}(92);Actinophytocola{genus}(92);uncultured_bacterium{species}(92)	Bacteria	Actinobacteria	Actinobacteria	Actinomycetales	Pseudonocardiaceae	Actinophytocola	uncultured_bacterium
ASV540	32	0	159	165	97	69	28	0	37	11	24	0	10	0	0	0	0	632	Bacteria{superkingdom}(95);Proteobacteria{phylum}(95);Alphaproteobacteria{class}(95);Sphingomonadales{order}(95);Sphingomonadaceae{family}(95);Sphingomonas{genus}(95);Sphingomonas_koreensis{species}(95)	Bacteria	Proteobacteria	Alphaproteobacteria	Sphingomonadales	Sphingomonadaceae	Sphingomonas	Sphingomonas_koreensis
ASV541	26	0	30	0	103	61	0	21	11	0	8	55	68	82	35	32	27	559	Bacteria{superkingdom}(96);Proteobacteria{phylum}(96);Alphaproteobacteria{class}(96);Rhizobiales{order}(96);Rhodobiaceae{family}(96);Rhodoligotrophos{genus}(96);uncultured_Rhizobiales_bacterium{species}(96)	Bacteria	Proteobacteria	Alphaproteobacteria	Rhizobiales	Rhodobiaceae	Rhodoligotrophos	uncultured_Rhizobiales_bacterium
ASV542	2	4	3	0	5	5	0	0	0	408	0	419	12	191	25	82	189	1345	Bacteria{superkingdom}(100);Actinobacteria{phylum}(100);Actinobacteria{class}(100);Actinomycetales{order}(100);Pseudonocardiaceae{family}(100);Unassigned{genus}(0);Unassigned{species}(0)	Bacteria	Actinobacteria	Actinobacteria	Actinomycetales	Pseudonocardiaceae	Unassigned	Unassigned
ASV543	0	0	0	27	0	0	0	0	0	0	0	0	0	0	0	0	0	27	Bacteria{superkingdom}(100);Bacteroidetes{phylum}(100);Sphingobacteriia{class}(100);Sphingobacteriales{order}(100);Chitinophagaceae{family}(100);Unassigned{genus}(0);Unassigned{species}(0)	Bacteria	Bacteroidetes	Sphingobacteriia	Sphingobacteriales	Chitinophagaceae	Unassigned	Unassigned
ASV544	0	0	31	0	75	16	0	0	10	0	0	15	0	0	0	0	0	147	Bacteria{superkingdom}(99);Chloroflexi{phylum}(99);Anaerolineae{class}(99);Anaerolineales{order}(99);Anaerolineaceae{family}(99);{genus}(99);Unassigned{species}(0)	Bacteria	Chloroflexi	Anaerolineae	Anaerolineales	Anaerolineaceae		Unassigned
ASV545	0	0	37	0	30	0	47	0	385	263	37	284	217	13	0	0	73	1386	Bacteria{superkingdom}(100);Proteobacteria{phylum}(100);Unassigned{class}(0);Unassigned{order}(0);Unassigned{family}(0);Unassigned{genus}(0);Unassigned{species}(0)	Bacteria	Proteobacteria	Unassigned	Unassigned	Unassigned	Unassigned	Unassigned
ASV548	68	0	24	0	0	18	64	695	90	204	38	37	63	0	34	0	30	1365	Bacteria{superkingdom}(100);Actinobacteria{phylum}(100);Unassigned{class}(0);Unassigned{order}(0);Unassigned{family}(0);Unassigned{genus}(0);Unassigned{species}(0)	Bacteria	Actinobacteria	Unassigned	Unassigned	Unassigned	Unassigned	Unassigned
ASV549	60	47	19	12	10	77	12	0	6	0	2	0	2	0	0	0	4	251	Bacteria{superkingdom}(99);Proteobacteria{phylum}(99);Deltaproteobacteria{class}(99);{order}(99);{family}(99);{genus}(99);uncultured_Acidobacteriales_bacterium{species}(99)	Bacteria	Proteobacteria	Deltaproteobacteria				uncultured_Acidobacteriales_bacterium
ASV550	0	101	0	0	16	0	20	105	282	171	0	136	13	19	218	347	93	1521	Bacteria{superkingdom}(90);Proteobacteria{phylum}(90);Alphaproteobacteria{class}(90);Alphaproteobacteria_incertae_sedis{order}(90);{family}(90);Geminicoccus{genus}(90);uncultured_bacterium{species}(90)	Bacteria	Proteobacteria	Alphaproteobacteria	Alphaproteobacteria_incertae_sedis		Geminicoccus	uncultured_bacterium
ASV552	0	0	30	0	59	0	0	70	173	155	9	231	0	0	0	0	0	727	Bacteria{superkingdom}(100);Proteobacteria{phylum}(100);Alphaproteobacteria{class}(100);Rhizobiales{order}(100);Xanthobacteraceae{family}(100);Pseudolabrys{genus}(100);Unassigned{species}(0)	Bacteria	Proteobacteria	Alphaproteobacteria	Rhizobiales	Xanthobacteraceae	Pseudolabrys	Unassigned
ASV553	29	40	0	0	60	24	0	0	0	0	0	0	0	0	0	0	0	153	Bacteria{superkingdom}(97);Bacteroidetes{phylum}(97);Cytophagia{class}(97);Cytophagales{order}(97);{family}(97);Chryseolinea{genus}(97);Unassigned{species}(0)	Bacteria	Bacteroidetes	Cytophagia	Cytophagales		Chryseolinea	Unassigned
ASV554	0	0	101	38	52	17	27	13	102	85	69	155	310	64	246	0	95	1374	Bacteria{superkingdom}(100);Bacteroidetes{phylum}(100);Cytophagia{class}(100);Cytophagales{order}(100);{family}(100);Ohtaekwangia{genus}(100);Unassigned{species}(0)	Bacteria	Bacteroidetes	Cytophagia	Cytophagales		Ohtaekwangia	Unassigned
ASV555	36	0	0	63	43	0	0	0	0	0	48	76	0	188	108	92	0	654	Bacteria{superkingdom}(100);Actinobacteria{phylum}(100);Actinobacteria{class}(100);Actinomycetales{order}(100);Nocardioidaceae{family}(100);Nocardioides{genus}(100);Unassigned{species}(0)	Bacteria	Actinobacteria	Actinobacteria	Actinomycetales	Nocardioidaceae	Nocardioides	Unassigned
ASV556	0	0	0	48	51	0	35	204	147	208	39	319	452	206	0	118	368	2195	Bacteria{superkingdom}(98);Chloroflexi{phylum}(98);Anaerolineae{class}(98);Anaerolineales{order}(98);Anaerolineaceae{family}(98);{genus}(98);uncultured_soil_bacterium{species}(98)	Bacteria	Chloroflexi	Anaerolineae	Anaerolineales	Anaerolineaceae		uncultured_soil_bacterium
ASV557	48	68	92	60	15	18	95	119	110	112	0	183	131	267	338	113	250	2019	Bacteria{superkingdom}(100);Proteobacteria{phylum}(100);Alphaproteobacteria{class}(100);Rhizobiales{order}(100);Methylobacteriaceae{family}(100);Microvirga{genus}(100);Unassigned{species}(0)	Bacteria	Proteobacteria	Alphaproteobacteria	Rhizobiales	Methylobacteriaceae	Microvirga	Unassigned
ASV558	65	156	81	41	70	22	79	28	90	49	11	72	9	128	0	152	8	1061	Bacteria{superkingdom}(100);Planctomycetes{phylum}(100);Planctomycetia{class}(100);Planctomycetales{order}(100);Planctomycetaceae{family}(100);Pirellula{genus}(100);Unassigned{species}(0)	Bacteria	Planctomycetes	Planctomycetia	Planctomycetales	Planctomycetaceae	Pirellula	Unassigned
ASV559	28	0	30	15	31	48	0	0	0	0	12	0	0	0	0	22	0	186	Bacteria{superkingdom}(97);Planctomycetes{phylum}(97);Planctomycetia{class}(97);Planctomycetales{order}(97);Planctomycetaceae{family}(97);{genus}(97);uncultured_Planctomyces_sp.{species}(97)	Bacteria	Planctomycetes	Planctomycetia	Planctomycetales	Planctomycetaceae		uncultured_Planctomyces_sp.
ASV560	240	0	68	0	23	0	0	146	0	0	0	0	0	0	0	0	42	519	Bacteria{superkingdom}(100);Acidobacteria{phylum}(100);Acidobacteria_Gp10{class}(100);{order}(100);{family}(100);Gp10{genus}(100);Unassigned{species}(0)	Bacteria	Acidobacteria	Acidobacteria_Gp10			Gp10	Unassigned
ASV562	22	0	25	13	63	135	0	0	0	17	0	0	0	0	0	0	0	275	Bacteria{superkingdom}(100);Chloroflexi{phylum}(100);Caldilineae{class}(100);Caldilineales{order}(100);Caldilineaceae{family}(100);Litorilinea{genus}(100);uncultured_Litorilinea_sp.{species}(100)	Bacteria	Chloroflexi	Caldilineae	Caldilineales	Caldilineaceae	Litorilinea	uncultured_Litorilinea_sp.
ASV563	0	54	123	15	16	0	24	0	0	23	14	71	0	80	109	118	0	647	Bacteria{superkingdom}(100);Proteobacteria{phylum}(100);Alphaproteobacteria{class}(100);Rhodobacterales{order}(100);Rhodobacteraceae{family}(100);Rubellimicrobium{genus}(100);Unassigned{species}(0)	Bacteria	Proteobacteria	Alphaproteobacteria	Rhodobacterales	Rhodobacteraceae	Rubellimicrobium	Unassigned
ASV564	0	0	0	58	0	74	0	0	33	0	25	0	0	0	0	8	0	198	Bacteria{superkingdom}(100);Acidobacteria{phylum}(100);Acidobacteria_Gp6{class}(100);{order}(100);{family}(100);Gp6{genus}(100);Unassigned{species}(0)	Bacteria	Acidobacteria	Acidobacteria_Gp6			Gp6	Unassigned
ASV565	0	0	0	0	23	0	0	0	0	0	0	0	0	0	53	0	0	76	Bacteria{superkingdom}(99);Proteobacteria{phylum}(99);Alphaproteobacteria{class}(99);Rhizobiales{order}(99);Rhizobiaceae{family}(99);Rhizobium{genus}(99);Unassigned{species}(0)	Bacteria	Proteobacteria	Alphaproteobacteria	Rhizobiales	Rhizobiaceae	Rhizobium	Unassigned
ASV566	112	51	0	30	87	318	0	0	0	0	0	0	28	0	0	0	0	626	Bacteria{superkingdom}(96);Proteobacteria{phylum}(96);Betaproteobacteria{class}(96);Burkholderiales{order}(96);Oxalobacteraceae{family}(96);Unassigned{genus}(0);Unassigned{species}(0)	Bacteria	Proteobacteria	Betaproteobacteria	Burkholderiales	Oxalobacteraceae	Unassigned	Unassigned
ASV567	97	0	92	0	0	59	0	0	58	0	0	0	0	0	0	0	30	336	Bacteria{superkingdom}(100);Actinobacteria{phylum}(100);Actinobacteria{class}(100);Acidimicrobiales{order}(100);Unassigned{family}(0);Unassigned{genus}(0);Unassigned{species}(0)	Bacteria	Actinobacteria	Actinobacteria	Acidimicrobiales	Unassigned	Unassigned	Unassigned
ASV568	48	5	68	91	130	33	0	0	40	0	9	51	25	27	0	0	46	573	Bacteria{superkingdom}(89);Proteobacteria{phylum}(89);Alphaproteobacteria{class}(89);Rhizobiales{order}(89);Hyphomicrobiaceae{family}(89);Devosia{genus}(89);Unassigned{species}(0)	Bacteria	Proteobacteria	Alphaproteobacteria	Rhizobiales	Hyphomicrobiaceae	Devosia	Unassigned
ASV569	50	0	38	94	23	52	55	23	125	115	180	30	56	52	23	23	24	963	Bacteria{superkingdom}(96);{phylum}(96);{class}(96);{order}(96);{family}(96);{genus}(96);Unassigned{species}(0)	Bacteria						Unassigned
ASV570	54	0	0	99	0	49	80	87	54	129	82	120	1163	57	0	0	87	2061	Bacteria{superkingdom}(100);Bacteroidetes{phylum}(100);Cytophagia{class}(100);Cytophagales{order}(100);{family}(100);Ohtaekwangia{genus}(100);Unassigned{species}(0)	Bacteria	Bacteroidetes	Cytophagia	Cytophagales		Ohtaekwangia	Unassigned
ASV571	39	68	46	25	35	43	50	9	48	42	25	0	18	18	78	31	0	575	Bacteria{superkingdom}(92);Chloroflexi{phylum}(92);Dehalococcoidia{class}(92);Dehalococcoidales{order}(92);Dehalococcoidaceae{family}(92);Dehalococcoides{genus}(92);uncultured_soil_bacterium{species}(92)	Bacteria	Chloroflexi	Dehalococcoidia	Dehalococcoidales	Dehalococcoidaceae	Dehalococcoides	uncultured_soil_bacterium
ASV572	38	0	47	11	235	68	0	0	0	0	0	0	0	0	0	0	0	399	Bacteria{superkingdom}(98);Bacteroidetes{phylum}(98);Sphingobacteriia{class}(98);Sphingobacteriales{order}(98);Chitinophagaceae{family}(98);Terrimonas{genus}(98);Unassigned{species}(0)	Bacteria	Bacteroidetes	Sphingobacteriia	Sphingobacteriales	Chitinophagaceae	Terrimonas	Unassigned
ASV573	72	103	24	0	0	0	0	0	0	0	0	0	0	0	0	0	0	199	Bacteria{superkingdom}(100);Acidobacteria{phylum}(100);Acidobacteria_Gp6{class}(100);{order}(100);{family}(100);Gp6{genus}(100);Unassigned{species}(0)	Bacteria	Acidobacteria	Acidobacteria_Gp6			Gp6	Unassigned
ASV574	126	6	61	118	152	155	38	0	0	35	0	0	25	15	0	0	17	748	Bacteria{superkingdom}(100);Proteobacteria{phylum}(100);Alphaproteobacteria{class}(100);Caulobacterales{order}(100);Caulobacteraceae{family}(100);Phenylobacterium{genus}(100);Unassigned{species}(0)	Bacteria	Proteobacteria	Alphaproteobacteria	Caulobacterales	Caulobacteraceae	Phenylobacterium	Unassigned
ASV575	203	0	211	13	93	63	8	0	0	9	0	0	18	0	0	9	0	627	Bacteria{superkingdom}(82);{phylum}(82);{class}(82);{order}(82);{family}(82);{genus}(82);uncultured_Gemmatimonadetes_bacterium{species}(82)	Bacteria						uncultured_Gemmatimonadetes_bacterium
ASV576	38	0	0	35	0	79	0	0	0	0	0	0	0	0	0	0	0	152	Bacteria{superkingdom}(86);Planctomycetes{phylum}(86);Planctomycetia{class}(86);Planctomycetales{order}(86);Planctomycetaceae{family}(86);{genus}(86);Unassigned{species}(0)	Bacteria	Planctomycetes	Planctomycetia	Planctomycetales	Planctomycetaceae		Unassigned
ASV577	20	0	15	0	29	71	0	29	0	0	0	0	8	0	0	0	0	172	Bacteria{superkingdom}(100);Ignavibacteriae{phylum}(100);Ignavibacteria{class}(100);Ignavibacteriales{order}(100);Ignavibacteriaceae{family}(100);Unassigned{genus}(0);Unassigned{species}(0)	Bacteria	Ignavibacteriae	Ignavibacteria	Ignavibacteriales	Ignavibacteriaceae	Unassigned	Unassigned
ASV578	0	39	0	0	0	34	0	0	0	63	0	0	0	0	0	0	0	136	Bacteria{superkingdom}(100);Acidobacteria{phylum}(100);Acidobacteria_Gp4{class}(100);{order}(100);{family}(100);Gp4{genus}(100);uncultured_Candidatus_Chloracidobacterium_sp.{species}(100)	Bacteria	Acidobacteria	Acidobacteria_Gp4			Gp4	uncultured_Candidatus_Chloracidobacterium_sp.
ASV579	0	0	0	61	35	64	48	56	53	126	23	94	67	100	161	33	68	989	Bacteria{superkingdom}(100);Proteobacteria{phylum}(100);Alphaproteobacteria{class}(100);Rhizobiales{order}(100);Unassigned{family}(0);Unassigned{genus}(0);Unassigned{species}(0)	Bacteria	Proteobacteria	Alphaproteobacteria	Rhizobiales	Unassigned	Unassigned	Unassigned
ASV580	25	0	15	0	0	53	0	0	10	0	0	0	26	0	0	36	0	165	Bacteria{superkingdom}(100);Unassigned{phylum}(0);Unassigned{class}(0);Unassigned{order}(0);Unassigned{family}(0);Unassigned{genus}(0);Unassigned{species}(0)	Bacteria	Unassigned	Unassigned	Unassigned	Unassigned	Unassigned	Unassigned
ASV581	59	38	83	96	43	56	19	36	33	89	28	65	49	127	17	24	16	878	Bacteria{superkingdom}(94);candidate_division_WPS-1{phylum}(94);{class}(94);{order}(94);{family}(94);WPS-1_genera_incertae_sedis{genus}(94);uncultured_bacterium{species}(94)	Bacteria	candidate_division_WPS-1				WPS-1_genera_incertae_sedis	uncultured_bacterium
ASV582	71	105	0	0	0	94	81	263	221	125	0	86	0	0	0	45	0	1091	Bacteria{superkingdom}(100);Acidobacteria{phylum}(100);Acidobacteria_Gp6{class}(100);{order}(100);{family}(100);Gp6{genus}(100);Unassigned{species}(0)	Bacteria	Acidobacteria	Acidobacteria_Gp6			Gp6	Unassigned
ASV583	123	37	168	118	75	89	8	19	0	48	0	0	25	15	0	0	0	725	Bacteria{superkingdom}(85);Actinobacteria{phylum}(85);Actinobacteria{class}(85);Rubrobacterales{order}(85);Rubrobacteraceae{family}(85);Rubrobacter{genus}(85);uncultured_bacterium{species}(85)	Bacteria	Actinobacteria	Actinobacteria	Rubrobacterales	Rubrobacteraceae	Rubrobacter	uncultured_bacterium
ASV584	101	45	68	0	432	0	11	0	7	0	0	0	0	0	0	0	43	707	Bacteria{superkingdom}(90);Bacteroidetes{phylum}(90);Cytophagia{class}(90);Cytophagales{order}(90);{family}(90);Ohtaekwangia{genus}(90);Bacteroidetes_bacterium_GS{species}(90)	Bacteria	Bacteroidetes	Cytophagia	Cytophagales		Ohtaekwangia	Bacteroidetes_bacterium_GS
ASV585	0	0	10	26	38	0	74	27	30	541	129	46	124	42	525	19	0	1631	Bacteria{superkingdom}(100);Bacteroidetes{phylum}(100);Sphingobacteriia{class}(100);Sphingobacteriales{order}(100);Chitinophagaceae{family}(100);Unassigned{genus}(0);Unassigned{species}(0)	Bacteria	Bacteroidetes	Sphingobacteriia	Sphingobacteriales	Chitinophagaceae	Unassigned	Unassigned
ASV586	96	0	0	148	111	0	0	0	0	0	0	57	19	55	53	46	19	604	Bacteria{superkingdom}(100);Armatimonadetes{phylum}(100);{class}(100);{order}(100);{family}(100);Armatimonadetes_gp4{genus}(100);uncultured_candidate_division_OP10_bacterium{species}(100)	Bacteria	Armatimonadetes				Armatimonadetes_gp4	uncultured_candidate_division_OP10_bacterium
ASV587	0	26	15	7	18	23	8	0	0	0	0	0	0	0	0	0	0	97	Bacteria{superkingdom}(100);Acidobacteria{phylum}(100);Acidobacteria_Gp6{class}(100);{order}(100);{family}(100);Gp6{genus}(100);Unassigned{species}(0)	Bacteria	Acidobacteria	Acidobacteria_Gp6			Gp6	Unassigned
ASV588	0	0	0	0	0	0	19	116	0	0	0	329	0	0	0	0	0	464	Bacteria{superkingdom}(80);Bacteroidetes{phylum}(80);Sphingobacteriia{class}(80);Sphingobacteriales{order}(80);Chitinophagaceae{family}(80);Flavitalea{genus}(80);uncultured_Niastella_sp.{species}(80)	Bacteria	Bacteroidetes	Sphingobacteriia	Sphingobacteriales	Chitinophagaceae	Flavitalea	uncultured_Niastella_sp.
ASV589	69	0	150	66	86	37	151	0	67	353	128	130	62	0	0	0	104	1403	Bacteria{superkingdom}(99);Proteobacteria{phylum}(99);Betaproteobacteria{class}(99);Burkholderiales{order}(99);Comamonadaceae{family}(99);Unassigned{genus}(0);Unassigned{species}(0)	Bacteria	Proteobacteria	Betaproteobacteria	Burkholderiales	Comamonadaceae	Unassigned	Unassigned
ASV592	24	16	0	0	22	0	0	0	14	29	0	45	0	88	0	104	0	342	Bacteria{superkingdom}(97);Proteobacteria{phylum}(97);Alphaproteobacteria{class}(97);Rhizobiales{order}(97);Xanthobacteraceae{family}(97);Pseudolabrys{genus}(97);Unassigned{species}(0)	Bacteria	Proteobacteria	Alphaproteobacteria	Rhizobiales	Xanthobacteraceae	Pseudolabrys	Unassigned
ASV593	106	26	58	0	0	0	0	0	36	20	0	0	0	0	0	0	0	246	Bacteria{superkingdom}(91);Proteobacteria{phylum}(91);Betaproteobacteria{class}(91);{order}(91);{family}(91);{genus}(91);uncultured_Alcaligenaceae_bacterium{species}(91)	Bacteria	Proteobacteria	Betaproteobacteria				uncultured_Alcaligenaceae_bacterium
ASV595	61	0	46	112	0	0	0	0	0	0	0	0	0	0	0	0	13	232	Bacteria{superkingdom}(84);Bacteroidetes{phylum}(84);Sphingobacteriia{class}(84);Sphingobacteriales{order}(84);Chitinophagaceae{family}(84);Niastella{genus}(84);uncultured_bacterium{species}(84)	Bacteria	Bacteroidetes	Sphingobacteriia	Sphingobacteriales	Chitinophagaceae	Niastella	uncultured_bacterium
ASV596	29	0	63	72	19	0	0	0	21	21	0	0	0	25	0	0	0	250	Bacteria{superkingdom}(100);Firmicutes{phylum}(100);Bacilli{class}(100);Bacillales{order}(100);Paenibacillaceae_1{family}(100);Paenibacillus{genus}(100);Unassigned{species}(0)	Bacteria	Firmicutes	Bacilli	Bacillales	Paenibacillaceae_1	Paenibacillus	Unassigned
ASV597	0	0	0	0	14	0	59	47	0	35	55	123	118	769	932	53	0	2205	Bacteria{superkingdom}(90);Actinobacteria{phylum}(90);Actinobacteria{class}(90);Acidimicrobiales{order}(90);Acidimicrobineae_incertae_sedis{family}(90);Aciditerrimonas{genus}(90);Unassigned{species}(0)	Bacteria	Actinobacteria	Actinobacteria	Acidimicrobiales	Acidimicrobineae_incertae_sedis	Aciditerrimonas	Unassigned
ASV598	59	35	32	47	51	16	37	63	69	103	38	23	72	99	37	58	79	918	Bacteria{superkingdom}(98);Chloroflexi{phylum}(98);{class}(98);{order}(98);{family}(98);{genus}(98);uncultured_Firmicutes_bacterium{species}(98)	Bacteria	Chloroflexi					uncultured_Firmicutes_bacterium
ASV599	24	73	37	0	53	18	38	59	135	112	26	103	65	91	169	100	106	1209	Bacteria{superkingdom}(100);Proteobacteria{phylum}(100);Alphaproteobacteria{class}(100);Caulobacterales{order}(100);Caulobacteraceae{family}(100);{genus}(100);Unassigned{species}(0)	Bacteria	Proteobacteria	Alphaproteobacteria	Caulobacterales	Caulobacteraceae		Unassigned
ASV600	0	0	0	82	0	0	47	55	38	32	34	44	51	281	423	77	136	1300	Bacteria{superkingdom}(100);Actinobacteria{phylum}(100);Actinobacteria{class}(100);Acidimicrobiales{order}(100);Unassigned{family}(0);Unassigned{genus}(0);Unassigned{species}(0)	Bacteria	Actinobacteria	Actinobacteria	Acidimicrobiales	Unassigned	Unassigned	Unassigned
ASV602	37	17	0	56	46	0	0	0	0	0	27	54	47	57	47	88	76	552	Bacteria{superkingdom}(100);Acidobacteria{phylum}(100);Acidobacteria_Gp6{class}(100);{order}(100);{family}(100);Gp6{genus}(100);Unassigned{species}(0)	Bacteria	Acidobacteria	Acidobacteria_Gp6			Gp6	Unassigned
ASV603	146	42	46	0	57	46	60	68	123	28	0	36	0	0	0	0	0	652	Bacteria{superkingdom}(93);Planctomycetes{phylum}(93);Planctomycetia{class}(93);Planctomycetales{order}(93);Planctomycetaceae{family}(93);Pirellula{genus}(93);uncultured_Planctomycetacia_bacterium{species}(93)	Bacteria	Planctomycetes	Planctomycetia	Planctomycetales	Planctomycetaceae	Pirellula	uncultured_Planctomycetacia_bacterium
ASV604	51	165	58	27	37	29	227	186	130	83	37	0	23	0	0	0	39	1092	Bacteria{superkingdom}(100);Proteobacteria{phylum}(100);Betaproteobacteria{class}(100);{order}(100);{family}(100);{genus}(100);Unassigned{species}(0)	Bacteria	Proteobacteria	Betaproteobacteria				Unassigned
ASV605	29	50	12	8	35	10	52	46	113	169	10	137	0	0	0	112	37	820	Bacteria{superkingdom}(98);Chloroflexi{phylum}(98);Chloroflexia{class}(98);{order}(98);{family}(98);{genus}(98);uncultured_soil_bacterium{species}(98)	Bacteria	Chloroflexi	Chloroflexia				uncultured_soil_bacterium
ASV606	95	0	52	50	39	63	38	0	212	24	0	111	15	0	21	200	65	985	Bacteria{superkingdom}(92);Actinobacteria{phylum}(92);Actinobacteria{class}(92);Acidimicrobiales{order}(92);Acidimicrobineae_incertae_sedis{family}(92);Aciditerrimonas{genus}(92);uncultured_bacterium{species}(92)	Bacteria	Actinobacteria	Actinobacteria	Acidimicrobiales	Acidimicrobineae_incertae_sedis	Aciditerrimonas	uncultured_bacterium
ASV607	29	0	70	10	0	0	15	12	12	0	9	21	0	0	0	0	33	211	Bacteria{superkingdom}(99);Proteobacteria{phylum}(99);Alphaproteobacteria{class}(99);Rhizobiales{order}(99);Rhizobiaceae{family}(99);Rhizobium{genus}(99);Unassigned{species}(0)	Bacteria	Proteobacteria	Alphaproteobacteria	Rhizobiales	Rhizobiaceae	Rhizobium	Unassigned
ASV608	0	25	0	0	0	0	0	0	0	36	0	0	0	0	0	0	0	61	Bacteria{superkingdom}(97);Bacteroidetes{phylum}(97);Sphingobacteriia{class}(97);Sphingobacteriales{order}(97);Chitinophagaceae{family}(97);Segetibacter{genus}(97);uncultured_bacterium{species}(97)	Bacteria	Bacteroidetes	Sphingobacteriia	Sphingobacteriales	Chitinophagaceae	Segetibacter	uncultured_bacterium
ASV610	31	20	57	15	142	236	0	0	9	16	0	0	30	6	0	18	0	580	Bacteria{superkingdom}(100);Armatimonadetes{phylum}(100);{class}(100);{order}(100);{family}(100);Armatimonadetes_gp4{genus}(100);uncultured_bacterium{species}(100)	Bacteria	Armatimonadetes				Armatimonadetes_gp4	uncultured_bacterium
ASV611	113	20	99	110	71	117	10	16	7	9	0	0	8	6	12	23	25	646	Bacteria{superkingdom}(100);Proteobacteria{phylum}(100);Alphaproteobacteria{class}(100);Caulobacterales{order}(100);Caulobacteraceae{family}(100);Unassigned{genus}(0);Unassigned{species}(0)	Bacteria	Proteobacteria	Alphaproteobacteria	Caulobacterales	Caulobacteraceae	Unassigned	Unassigned
ASV612	82	0	37	49	67	233	0	0	0	0	0	0	0	0	0	0	35	503	Bacteria{superkingdom}(100);Acidobacteria{phylum}(100);Acidobacteria_Gp6{class}(100);{order}(100);{family}(100);Gp6{genus}(100);Unassigned{species}(0)	Bacteria	Acidobacteria	Acidobacteria_Gp6			Gp6	Unassigned
ASV613	46	38	58	33	64	87	0	0	0	0	0	0	0	0	0	0	0	326	Bacteria{superkingdom}(96);{phylum}(96);{class}(96);{order}(96);{family}(96);{genus}(96);uncultured_Anaerolineae_bacterium{species}(96)	Bacteria						uncultured_Anaerolineae_bacterium
ASV614	69	0	43	76	25	55	0	0	0	54	29	13	25	26	0	161	0	576	Bacteria{superkingdom}(91);Planctomycetes{phylum}(91);Planctomycetia{class}(91);Planctomycetales{order}(91);Planctomycetaceae{family}(91);Singulisphaera{genus}(91);uncultured_Planctomycetacia_bacterium{species}(91)	Bacteria	Planctomycetes	Planctomycetia	Planctomycetales	Planctomycetaceae	Singulisphaera	uncultured_Planctomycetacia_bacterium
ASV615	53	73	73	0	32	55	101	104	133	54	34	57	58	24	85	31	51	1018	Bacteria{superkingdom}(91);Proteobacteria{phylum}(91);Alphaproteobacteria{class}(91);Rhizobiales{order}(91);Hyphomicrobiaceae{family}(91);Rhodoplanes{genus}(91);Unassigned{species}(0)	Bacteria	Proteobacteria	Alphaproteobacteria	Rhizobiales	Hyphomicrobiaceae	Rhodoplanes	Unassigned
ASV616	0	35	0	0	0	0	0	0	0	0	0	28	0	125	77	110	0	375	Bacteria{superkingdom}(100);Chloroflexi{phylum}(100);Thermomicrobia{class}(100);Unassigned{order}(0);Unassigned{family}(0);Unassigned{genus}(0);Unassigned{species}(0)	Bacteria	Chloroflexi	Thermomicrobia	Unassigned	Unassigned	Unassigned	Unassigned
ASV617	0	0	0	0	378	0	0	0	0	0	0	0	0	0	0	0	0	378	Bacteria{superkingdom}(100);Acidobacteria{phylum}(100);Acidobacteria_Gp7{class}(100);{order}(100);{family}(100);Gp7{genus}(100);Unassigned{species}(0)	Bacteria	Acidobacteria	Acidobacteria_Gp7			Gp7	Unassigned
ASV618	0	82	0	0	0	32	37	123	22	51	55	72	69	99	97	50	71	860	Bacteria{superkingdom}(94);Verrucomicrobia{phylum}(94);Opitutae{class}(94);Opitutales{order}(94);Opitutaceae{family}(94);Opitutus{genus}(94);uncultured_Opitutaceae_bacterium{species}(94)	Bacteria	Verrucomicrobia	Opitutae	Opitutales	Opitutaceae	Opitutus	uncultured_Opitutaceae_bacterium
ASV619	57	0	84	57	45	48	31	10	57	80	23	26	11	129	0	140	32	830	Bacteria{superkingdom}(100);Proteobacteria{phylum}(100);Alphaproteobacteria{class}(100);Caulobacterales{order}(100);Caulobacteraceae{family}(100);Unassigned{genus}(0);Unassigned{species}(0)	Bacteria	Proteobacteria	Alphaproteobacteria	Caulobacterales	Caulobacteraceae	Unassigned	Unassigned
ASV620	63	120	95	54	55	72	78	105	94	148	26	57	0	15	36	41	31	1090	Bacteria{superkingdom}(100);Actinobacteria{phylum}(100);Actinobacteria{class}(100);Gaiellales{order}(100);Gaiellaceae{family}(100);Gaiella{genus}(100);Unassigned{species}(0)	Bacteria	Actinobacteria	Actinobacteria	Gaiellales	Gaiellaceae	Gaiella	Unassigned
ASV621	28	0	0	0	153	139	25	11	11	35	53	12	303	0	0	0	0	770	Bacteria{superkingdom}(80);Firmicutes{phylum}(80);Bacilli{class}(80);Bacillales{order}(80);Planococcaceae{family}(80);Lysinibacillus{genus}(80);Unassigned{species}(0)	Bacteria	Firmicutes	Bacilli	Bacillales	Planococcaceae	Lysinibacillus	Unassigned
ASV622	56	0	0	0	0	34	0	0	0	0	0	0	0	0	0	0	0	90	Bacteria{superkingdom}(97);Planctomycetes{phylum}(97);Planctomycetia{class}(97);Planctomycetales{order}(97);Planctomycetaceae{family}(97);Blastopirellula{genus}(97);uncultured_bacterium{species}(97)	Bacteria	Planctomycetes	Planctomycetia	Planctomycetales	Planctomycetaceae	Blastopirellula	uncultured_bacterium
ASV623	65	0	0	0	0	0	0	0	0	0	0	53	0	165	49	173	0	505	Bacteria{superkingdom}(100);Actinobacteria{phylum}(100);Actinobacteria{class}(100);Actinomycetales{order}(100);Pseudonocardiaceae{family}(100);Lentzea{genus}(100);Unassigned{species}(0)	Bacteria	Actinobacteria	Actinobacteria	Actinomycetales	Pseudonocardiaceae	Lentzea	Unassigned
ASV624	55	0	0	60	107	0	28	97	149	159	38	79	118	113	91	19	135	1248	Bacteria{superkingdom}(100);Bacteroidetes{phylum}(100);Sphingobacteriia{class}(100);Sphingobacteriales{order}(100);Chitinophagaceae{family}(100);Flavitalea{genus}(100);Unassigned{species}(0)	Bacteria	Bacteroidetes	Sphingobacteriia	Sphingobacteriales	Chitinophagaceae	Flavitalea	Unassigned
ASV625	0	0	0	0	0	0	0	6	0	0	0	0	0	0	0	0	0	6	Bacteria{superkingdom}(100);Proteobacteria{phylum}(100);Alphaproteobacteria{class}(100);Rhizobiales{order}(100);Hyphomicrobiaceae{family}(100);Devosia{genus}(100);Unassigned{species}(0)	Bacteria	Proteobacteria	Alphaproteobacteria	Rhizobiales	Hyphomicrobiaceae	Devosia	Unassigned
ASV626	18	0	72	35	14	18	130	488	128	15	96	62	127	28	0	0	58	1289	Bacteria{superkingdom}(100);Planctomycetes{phylum}(100);Planctomycetia{class}(100);Planctomycetales{order}(100);Planctomycetaceae{family}(100);Unassigned{genus}(0);Unassigned{species}(0)	Bacteria	Planctomycetes	Planctomycetia	Planctomycetales	Planctomycetaceae	Unassigned	Unassigned
ASV627	110	0	0	52	0	0	0	0	0	48	119	0	0	25	113	100	0	567	Bacteria{superkingdom}(100);Acidobacteria{phylum}(100);Acidobacteria_Gp7{class}(100);{order}(100);{family}(100);Gp7{genus}(100);Unassigned{species}(0)	Bacteria	Acidobacteria	Acidobacteria_Gp7			Gp7	Unassigned
ASV628	0	37	54	55	0	0	146	79	81	138	119	59	0	0	0	0	103	871	Bacteria{superkingdom}(100);Acidobacteria{phylum}(100);Acidobacteria_Gp6{class}(100);{order}(100);{family}(100);Gp6{genus}(100);Unassigned{species}(0)	Bacteria	Acidobacteria	Acidobacteria_Gp6			Gp6	Unassigned
ASV629	38	541	54	0	24	0	0	0	11	0	0	7	0	0	0	0	0	675	Bacteria{superkingdom}(100);Verrucomicrobia{phylum}(100);Opitutae{class}(100);Opitutales{order}(100);Opitutaceae{family}(100);Opitutus{genus}(100);Unassigned{species}(0)	Bacteria	Verrucomicrobia	Opitutae	Opitutales	Opitutaceae	Opitutus	Unassigned
ASV631	58	0	49	0	0	29	304	0	281	15	0	280	107	16	136	289	312	1876	Bacteria{superkingdom}(100);Actinobacteria{phylum}(100);Actinobacteria{class}(100);Solirubrobacterales{order}(100);Unassigned{family}(0);Unassigned{genus}(0);Unassigned{species}(0)	Bacteria	Actinobacteria	Actinobacteria	Solirubrobacterales	Unassigned	Unassigned	Unassigned
ASV632	29	74	88	61	25	64	0	52	0	15	34	22	111	125	139	47	211	1097	Bacteria{superkingdom}(100);Acidobacteria{phylum}(100);Acidobacteria_Gp16{class}(100);{order}(100);{family}(100);Gp16{genus}(100);Unassigned{species}(0)	Bacteria	Acidobacteria	Acidobacteria_Gp16			Gp16	Unassigned
ASV633	96	0	110	56	55	63	56	59	81	48	37	59	0	0	0	0	0	720	Bacteria{superkingdom}(100);Chloroflexi{phylum}(100);Chloroflexia{class}(100);{order}(100);{family}(100);{genus}(100);uncultured_bacterium{species}(100)	Bacteria	Chloroflexi	Chloroflexia				uncultured_bacterium
ASV634	105	0	16	0	48	142	33	0	0	0	26	0	0	0	0	0	0	370	Bacteria{superkingdom}(100);Bacteroidetes{phylum}(100);Sphingobacteriia{class}(100);Sphingobacteriales{order}(100);Chitinophagaceae{family}(100);Niastella{genus}(100);Unassigned{species}(0)	Bacteria	Bacteroidetes	Sphingobacteriia	Sphingobacteriales	Chitinophagaceae	Niastella	Unassigned
ASV635	0	0	0	47	0	41	0	0	0	0	0	0	0	0	0	0	0	88	Bacteria{superkingdom}(100);Acidobacteria{phylum}(100);Acidobacteria_Gp6{class}(100);{order}(100);{family}(100);Gp6{genus}(100);Unassigned{species}(0)	Bacteria	Acidobacteria	Acidobacteria_Gp6			Gp6	Unassigned
ASV636	0	9	0	0	0	0	0	0	0	0	0	46	0	0	0	0	0	55	Bacteria{superkingdom}(92);Proteobacteria{phylum}(92);Betaproteobacteria{class}(92);Burkholderiales{order}(92);Comamonadaceae{family}(92);Variovorax{genus}(92);Unassigned{species}(0)	Bacteria	Proteobacteria	Betaproteobacteria	Burkholderiales	Comamonadaceae	Variovorax	Unassigned
ASV637	160	37	118	0	20	26	247	176	75	173	19	176	14	0	0	25	0	1266	Bacteria{superkingdom}(93);Actinobacteria{phylum}(93);Actinobacteria{class}(93);Solirubrobacterales{order}(93);{family}(93);{genus}(93);Unassigned{species}(0)	Bacteria	Actinobacteria	Actinobacteria	Solirubrobacterales			Unassigned
ASV638	44	35	24	76	54	63	96	35	0	11	20	42	38	11	47	29	42	667	Bacteria{superkingdom}(100);Proteobacteria{phylum}(100);Alphaproteobacteria{class}(100);{order}(100);{family}(100);{genus}(100);rhizosphere_soil_bacterium_RSC-II-82{species}(100)	Bacteria	Proteobacteria	Alphaproteobacteria				rhizosphere_soil_bacterium_RSC-II-82
ASV639	77	39	15	37	0	26	29	13	26	65	44	0	16	142	0	90	72	691	Bacteria{superkingdom}(94);Planctomycetes{phylum}(94);Planctomycetia{class}(94);Planctomycetales{order}(94);Planctomycetaceae{family}(94);Pirellula{genus}(94);uncultured_Firmicutes_bacterium{species}(94)	Bacteria	Planctomycetes	Planctomycetia	Planctomycetales	Planctomycetaceae	Pirellula	uncultured_Firmicutes_bacterium
ASV640	0	0	17	0	0	18	0	0	0	0	0	0	0	0	12	0	0	47	Bacteria{superkingdom}(85);Actinobacteria{phylum}(85);Actinobacteria{class}(85);Actinomycetales{order}(85);Microbacteriaceae{family}(85);Lysinimonas{genus}(85);uncultured_Microbacteriaceae_bacterium{species}(85)	Bacteria	Actinobacteria	Actinobacteria	Actinomycetales	Microbacteriaceae	Lysinimonas	uncultured_Microbacteriaceae_bacterium
ASV641	0	93	63	0	72	0	97	149	138	65	0	93	0	0	0	0	45	815	Bacteria{superkingdom}(100);Proteobacteria{phylum}(100);Betaproteobacteria{class}(100);{order}(100);{family}(100);{genus}(100);Unassigned{species}(0)	Bacteria	Proteobacteria	Betaproteobacteria				Unassigned
ASV642	58	39	44	0	49	30	80	71	50	0	33	23	86	51	13	75	54	756	Bacteria{superkingdom}(94);Planctomycetes{phylum}(94);Planctomycetia{class}(94);Planctomycetales{order}(94);Planctomycetaceae{family}(94);Thermogutta{genus}(94);Unassigned{species}(0)	Bacteria	Planctomycetes	Planctomycetia	Planctomycetales	Planctomycetaceae	Thermogutta	Unassigned
ASV643	0	0	0	56	0	52	0	21	0	8	0	0	0	0	0	0	0	137	Bacteria{superkingdom}(100);Candidatus_Saccharibacteria{phylum}(100);{class}(100);{order}(100);{family}(100);Saccharibacteria_genera_incertae_sedis{genus}(100);Unassigned{species}(0)	Bacteria	Candidatus_Saccharibacteria				Saccharibacteria_genera_incertae_sedis	Unassigned
ASV644	0	31	0	43	186	0	0	36	0	31	31	113	169	67	127	44	114	992	Bacteria{superkingdom}(99);Proteobacteria{phylum}(99);Betaproteobacteria{class}(99);Burkholderiales{order}(99);Burkholderiales_incertae_sedis{family}(99);Unassigned{genus}(0);Unassigned{species}(0)	Bacteria	Proteobacteria	Betaproteobacteria	Burkholderiales	Burkholderiales_incertae_sedis	Unassigned	Unassigned
ASV645	0	0	0	0	112	318	0	0	0	0	0	0	0	0	0	0	0	430	Bacteria{superkingdom}(97);Proteobacteria{phylum}(97);Alphaproteobacteria{class}(97);Rhizobiales{order}(97);Bradyrhizobiaceae{family}(97);Bradyrhizobium{genus}(97);Unassigned{species}(0)	Bacteria	Proteobacteria	Alphaproteobacteria	Rhizobiales	Bradyrhizobiaceae	Bradyrhizobium	Unassigned
ASV646	84	6	71	97	73	62	0	0	0	0	0	2	16	8	0	0	0	419	Bacteria{superkingdom}(100);Planctomycetes{phylum}(100);Planctomycetia{class}(100);Planctomycetales{order}(100);Planctomycetaceae{family}(100);{genus}(100);Unassigned{species}(0)	Bacteria	Planctomycetes	Planctomycetia	Planctomycetales	Planctomycetaceae		Unassigned
ASV647	0	73	0	0	0	0	0	0	0	21	0	16	29	118	123	182	0	562	Bacteria{superkingdom}(89);Bacteroidetes{phylum}(89);Sphingobacteriia{class}(89);Sphingobacteriales{order}(89);Chitinophagaceae{family}(89);Flavisolibacter{genus}(89);uncultured_Bacteroidetes_bacterium{species}(89)	Bacteria	Bacteroidetes	Sphingobacteriia	Sphingobacteriales	Chitinophagaceae	Flavisolibacter	uncultured_Bacteroidetes_bacterium
ASV648	33	120	47	64	162	74	87	74	85	82	0	55	0	61	0	0	0	944	Bacteria{superkingdom}(100);Bacteroidetes{phylum}(100);Sphingobacteriia{class}(100);Sphingobacteriales{order}(100);Chitinophagaceae{family}(100);Flavisolibacter{genus}(100);Unassigned{species}(0)	Bacteria	Bacteroidetes	Sphingobacteriia	Sphingobacteriales	Chitinophagaceae	Flavisolibacter	Unassigned
ASV649	43	0	44	65	138	89	0	0	0	0	0	0	0	0	0	0	0	379	Bacteria{superkingdom}(100);Planctomycetes{phylum}(100);Planctomycetia{class}(100);Planctomycetales{order}(100);Planctomycetaceae{family}(100);Gemmata{genus}(100);Unassigned{species}(0)	Bacteria	Planctomycetes	Planctomycetia	Planctomycetales	Planctomycetaceae	Gemmata	Unassigned
ASV650	0	0	0	0	0	0	0	1018	215	206	0	0	0	0	0	0	0	1439	Bacteria{superkingdom}(100);Proteobacteria{phylum}(100);Alphaproteobacteria{class}(100);Rhizobiales{order}(100);Methylobacteriaceae{family}(100);Microvirga{genus}(100);Unassigned{species}(0)	Bacteria	Proteobacteria	Alphaproteobacteria	Rhizobiales	Methylobacteriaceae	Microvirga	Unassigned
ASV651	52	79	169	16	18	94	54	18	5	6	0	6	0	0	0	0	10	527	Bacteria{superkingdom}(100);Acidobacteria{phylum}(100);Acidobacteria_Gp16{class}(100);{order}(100);{family}(100);Gp16{genus}(100);Unassigned{species}(0)	Bacteria	Acidobacteria	Acidobacteria_Gp16			Gp16	Unassigned
ASV652	122	37	345	35	0	48	0	0	0	25	28	28	0	0	0	0	99	767	Bacteria{superkingdom}(100);Acidobacteria{phylum}(100);Acidobacteria_Gp7{class}(100);{order}(100);{family}(100);Gp7{genus}(100);Unassigned{species}(0)	Bacteria	Acidobacteria	Acidobacteria_Gp7			Gp7	Unassigned
ASV653	0	23	0	0	15	0	20	13	59	52	0	18	757	47	160	83	0	1247	Bacteria{superkingdom}(100);Bacteroidetes{phylum}(100);Sphingobacteriia{class}(100);Sphingobacteriales{order}(100);Chitinophagaceae{family}(100);Unassigned{genus}(0);Unassigned{species}(0)	Bacteria	Bacteroidetes	Sphingobacteriia	Sphingobacteriales	Chitinophagaceae	Unassigned	Unassigned
ASV654	0	80	3	0	0	0	0	49	67	75	10	19	92	62	164	101	227	949	Bacteria{superkingdom}(98);Chloroflexi{phylum}(98);Chloroflexia{class}(98);{order}(98);{family}(98);{genus}(98);uncultured_bacterium{species}(98)	Bacteria	Chloroflexi	Chloroflexia				uncultured_bacterium
ASV655	0	138	0	0	0	0	0	0	0	108	0	0	0	0	25	63	0	334	Bacteria{superkingdom}(100);Actinobacteria{phylum}(100);Actinobacteria{class}(100);Actinomycetales{order}(100);Pseudonocardiaceae{family}(100);Pseudonocardia{genus}(100);Unassigned{species}(0)	Bacteria	Actinobacteria	Actinobacteria	Actinomycetales	Pseudonocardiaceae	Pseudonocardia	Unassigned
ASV656	0	0	0	0	0	0	0	0	0	0	22	37	0	187	48	113	9	416	Bacteria{superkingdom}(100);Chloroflexi{phylum}(100);Thermomicrobia{class}(100);Unassigned{order}(0);Unassigned{family}(0);Unassigned{genus}(0);Unassigned{species}(0)	Bacteria	Chloroflexi	Thermomicrobia	Unassigned	Unassigned	Unassigned	Unassigned
ASV657	31	56	40	22	15	19	85	19	71	77	53	36	50	89	112	55	130	960	Bacteria{superkingdom}(83);Chloroflexi{phylum}(83);Anaerolineae{class}(83);Anaerolineales{order}(83);Anaerolineaceae{family}(83);{genus}(83);Unassigned{species}(0)	Bacteria	Chloroflexi	Anaerolineae	Anaerolineales	Anaerolineaceae		Unassigned
ASV659	80	45	20	0	0	32	67	40	122	21	0	0	0	0	0	65	0	492	Bacteria{superkingdom}(100);Acidobacteria{phylum}(100);Acidobacteria_Gp6{class}(100);{order}(100);{family}(100);Gp6{genus}(100);Unassigned{species}(0)	Bacteria	Acidobacteria	Acidobacteria_Gp6			Gp6	Unassigned
ASV662	60	0	0	0	0	0	0	0	0	0	0	0	0	0	0	0	0	60	Bacteria{superkingdom}(93);Proteobacteria{phylum}(93);Deltaproteobacteria{class}(93);{order}(93);{family}(93);{genus}(93);uncultured_Acidobacteriales_bacterium{species}(93)	Bacteria	Proteobacteria	Deltaproteobacteria				uncultured_Acidobacteriales_bacterium
ASV663	0	205	0	0	0	0	54	383	83	77	0	76	0	0	0	58	0	936	Bacteria{superkingdom}(100);Bacteroidetes{phylum}(100);Sphingobacteriia{class}(100);Sphingobacteriales{order}(100);Chitinophagaceae{family}(100);Unassigned{genus}(0);Unassigned{species}(0)	Bacteria	Bacteroidetes	Sphingobacteriia	Sphingobacteriales	Chitinophagaceae	Unassigned	Unassigned
ASV664	26	0	55	93	0	54	409	69	43	30	80	90	117	204	71	26	71	1438	Bacteria{superkingdom}(100);Actinobacteria{phylum}(100);Actinobacteria{class}(100);Gaiellales{order}(100);Gaiellaceae{family}(100);Gaiella{genus}(100);uncultured_Actinomycetales_bacterium{species}(100)	Bacteria	Actinobacteria	Actinobacteria	Gaiellales	Gaiellaceae	Gaiella	uncultured_Actinomycetales_bacterium
ASV665	52	0	19	38	0	39	94	42	0	0	109	0	66	33	0	0	49	541	Bacteria{superkingdom}(99);{phylum}(99);{class}(99);{order}(99);{family}(99);{genus}(99);uncultured_Syntrophobacterales_bacterium{species}(99)	Bacteria						uncultured_Syntrophobacterales_bacterium
ASV666	67	23	52	24	21	20	26	3	15	14	17	16	25	14	8	0	4	349	Bacteria{superkingdom}(100);Proteobacteria{phylum}(100);Alphaproteobacteria{class}(100);Rhizobiales{order}(100);Unassigned{family}(0);Unassigned{genus}(0);Unassigned{species}(0)	Bacteria	Proteobacteria	Alphaproteobacteria	Rhizobiales	Unassigned	Unassigned	Unassigned
ASV667	31	52	106	33	60	73	32	36	13	0	29	14	73	45	0	10	42	649	Bacteria{superkingdom}(86);Chloroflexi{phylum}(86);Anaerolineae{class}(86);Anaerolineales{order}(86);Anaerolineaceae{family}(86);Unassigned{genus}(0);Unassigned{species}(0)	Bacteria	Chloroflexi	Anaerolineae	Anaerolineales	Anaerolineaceae	Unassigned	Unassigned
ASV668	86	0	153	0	271	315	0	0	117	136	0	0	0	0	0	0	0	1078	Bacteria{superkingdom}(100);Actinobacteria{phylum}(100);Actinobacteria{class}(100);Actinomycetales{order}(100);Nocardioidaceae{family}(100);Kribbella{genus}(100);Unassigned{species}(0)	Bacteria	Actinobacteria	Actinobacteria	Actinomycetales	Nocardioidaceae	Kribbella	Unassigned
ASV669	62	52	68	38	33	29	53	242	97	81	24	68	19	44	0	12	18	940	Bacteria{superkingdom}(84);Chloroflexi{phylum}(84);Chloroflexia{class}(84);{order}(84);{family}(84);{genus}(84);uncultured_bacterium{species}(84)	Bacteria	Chloroflexi	Chloroflexia				uncultured_bacterium
ASV670	59	0	20	0	0	39	133	0	0	0	44	0	0	0	0	0	0	295	Bacteria{superkingdom}(100);Proteobacteria{phylum}(100);Betaproteobacteria{class}(100);{order}(100);{family}(100);{genus}(100);Unassigned{species}(0)	Bacteria	Proteobacteria	Betaproteobacteria				Unassigned
ASV671	72	9	0	227	0	0	0	0	68	220	53	29	116	0	82	0	11	887	Bacteria{superkingdom}(87);Firmicutes{phylum}(87);Bacilli{class}(87);Bacillales{order}(87);Bacillaceae_1{family}(87);Domibacillus{genus}(87);uncultured_bacterium{species}(87)	Bacteria	Firmicutes	Bacilli	Bacillales	Bacillaceae_1	Domibacillus	uncultured_bacterium
ASV672	22	0	45	63	48	0	0	34	43	62	0	48	22	0	0	0	38	425	Bacteria{superkingdom}(100);Proteobacteria{phylum}(100);Betaproteobacteria{class}(100);Burkholderiales{order}(100);Unassigned{family}(0);Unassigned{genus}(0);Unassigned{species}(0)	Bacteria	Proteobacteria	Betaproteobacteria	Burkholderiales	Unassigned	Unassigned	Unassigned
ASV673	22	24	8	38	0	41	9	0	0	0	0	0	0	0	0	0	16	158	Bacteria{superkingdom}(100);Proteobacteria{phylum}(100);Alphaproteobacteria{class}(100);Rhizobiales{order}(100);Bradyrhizobiaceae{family}(100);Bosea{genus}(100);Unassigned{species}(0)	Bacteria	Proteobacteria	Alphaproteobacteria	Rhizobiales	Bradyrhizobiaceae	Bosea	Unassigned
ASV674	22	0	0	68	15	102	0	0	0	0	0	0	0	0	0	0	61	268	Bacteria{superkingdom}(100);Proteobacteria{phylum}(100);Alphaproteobacteria{class}(100);Rhodospirillales{order}(100);Rhodospirillaceae{family}(100);Dongia{genus}(100);Unassigned{species}(0)	Bacteria	Proteobacteria	Alphaproteobacteria	Rhodospirillales	Rhodospirillaceae	Dongia	Unassigned
ASV675	28	0	24	43	456	21	0	6	11	0	0	0	0	0	0	0	0	589	Bacteria{superkingdom}(97);Bacteroidetes{phylum}(97);Sphingobacteriia{class}(97);Sphingobacteriales{order}(97);Chitinophagaceae{family}(97);{genus}(97);Unassigned{species}(0)	Bacteria	Bacteroidetes	Sphingobacteriia	Sphingobacteriales	Chitinophagaceae		Unassigned
ASV676	3	0	66	140	52	12	25	38	10	22	100	8	267	0	0	0	7	750	Bacteria{superkingdom}(94);Firmicutes{phylum}(94);Bacilli{class}(94);Bacillales{order}(94);Bacillaceae_1{family}(94);Bacillus{genus}(94);Unassigned{species}(0)	Bacteria	Firmicutes	Bacilli	Bacillales	Bacillaceae_1	Bacillus	Unassigned
ASV678	0	0	0	240	0	0	4	0	0	0	10	0	0	0	0	0	0	254	Bacteria{superkingdom}(97);Actinobacteria{phylum}(97);Actinobacteria{class}(97);Actinomycetales{order}(97);Nocardiaceae{family}(97);Nocardia{genus}(97);Unassigned{species}(0)	Bacteria	Actinobacteria	Actinobacteria	Actinomycetales	Nocardiaceae	Nocardia	Unassigned
ASV680	53	21	47	28	141	52	46	43	73	40	10	34	0	22	0	0	0	610	Bacteria{superkingdom}(100);Bacteroidetes{phylum}(100);Sphingobacteriia{class}(100);Sphingobacteriales{order}(100);Chitinophagaceae{family}(100);Unassigned{genus}(0);Unassigned{species}(0)	Bacteria	Bacteroidetes	Sphingobacteriia	Sphingobacteriales	Chitinophagaceae	Unassigned	Unassigned
ASV681	14	12	52	0	19	54	35	31	0	0	22	7	0	0	0	0	0	246	Bacteria{superkingdom}(98);Chloroflexi{phylum}(98);Unassigned{class}(0);Unassigned{order}(0);Unassigned{family}(0);Unassigned{genus}(0);Unassigned{species}(0)	Bacteria	Chloroflexi	Unassigned	Unassigned	Unassigned	Unassigned	Unassigned
ASV683	56	0	101	83	83	49	0	84	83	0	0	73	0	0	0	0	79	691	Bacteria{superkingdom}(100);Chloroflexi{phylum}(100);Anaerolineae{class}(100);Anaerolineales{order}(100);Anaerolineaceae{family}(100);{genus}(100);uncultured_soil_bacterium{species}(100)	Bacteria	Chloroflexi	Anaerolineae	Anaerolineales	Anaerolineaceae		uncultured_soil_bacterium
ASV684	0	0	39	76	31	0	45	23	0	36	44	20	146	95	23	19	67	664	Bacteria{superkingdom}(93);Actinobacteria{phylum}(93);Actinobacteria{class}(93);Acidimicrobiales{order}(93);Iamiaceae{family}(93);{genus}(93);uncultured_Iamia_sp.{species}(93)	Bacteria	Actinobacteria	Actinobacteria	Acidimicrobiales	Iamiaceae		uncultured_Iamia_sp.
ASV685	0	65	0	100	76	0	0	0	0	0	0	0	0	0	0	0	0	241	Bacteria{superkingdom}(100);Chloroflexi{phylum}(100);Thermomicrobia{class}(100);Sphaerobacterales{order}(100);Sphaerobacteraceae{family}(100);Sphaerobacter{genus}(100);uncultured_bacterium{species}(100)	Bacteria	Chloroflexi	Thermomicrobia	Sphaerobacterales	Sphaerobacteraceae	Sphaerobacter	uncultured_bacterium
ASV686	0	38	0	0	0	0	16	41	63	48	0	54	0	0	16	115	39	430	Bacteria{superkingdom}(90);Armatimonadetes{phylum}(90);Armatimonadia{class}(90);Armatimonadales{order}(90);Armatimonadaceae{family}(90);Armatimonas/Armatimonadetes_gp1{genus}(90);uncultured_bacterium{species}(90)	Bacteria	Armatimonadetes	Armatimonadia	Armatimonadales	Armatimonadaceae	Armatimonas/Armatimonadetes_gp1	uncultured_bacterium
ASV687	20	0	25	0	0	19	141	0	7	0	84	0	0	0	0	0	63	359	Bacteria{superkingdom}(99);{phylum}(99);{class}(99);{order}(99);{family}(99);{genus}(99);uncultured_Actinomyces_sp.{species}(99)	Bacteria						uncultured_Actinomyces_sp.
ASV688	0	36	0	0	0	0	0	11	0	55	0	20	0	0	0	0	0	122	Bacteria{superkingdom}(100);Chloroflexi{phylum}(100);Caldilineae{class}(100);Caldilineales{order}(100);Caldilineaceae{family}(100);Litorilinea{genus}(100);uncultured_Rubrobacter_sp.{species}(100)	Bacteria	Chloroflexi	Caldilineae	Caldilineales	Caldilineaceae	Litorilinea	uncultured_Rubrobacter_sp.
ASV689	27	0	20	31	0	0	302	418	233	81	0	187	32	17	0	10	141	1499	Bacteria{superkingdom}(97);Acidobacteria{phylum}(97);Acidobacteria_Gp6{class}(97);{order}(97);{family}(97);Gp6{genus}(97);uncultured_Acidobacterium_sp.{species}(97)	Bacteria	Acidobacteria	Acidobacteria_Gp6			Gp6	uncultured_Acidobacterium_sp.
ASV690	0	0	0	28	0	137	0	0	0	0	0	0	0	0	0	0	0	165	Bacteria{superkingdom}(99);Actinobacteria{phylum}(99);Actinobacteria{class}(99);Actinomycetales{order}(99);Streptomycetaceae{family}(99);Streptomyces{genus}(99);Unassigned{species}(0)	Bacteria	Actinobacteria	Actinobacteria	Actinomycetales	Streptomycetaceae	Streptomyces	Unassigned
ASV691	12	429	0	93	14	0	0	0	0	43	0	76	0	375	31	59	176	1308	Bacteria{superkingdom}(100);Actinobacteria{phylum}(100);Unassigned{class}(0);Unassigned{order}(0);Unassigned{family}(0);Unassigned{genus}(0);Unassigned{species}(0)	Bacteria	Actinobacteria	Unassigned	Unassigned	Unassigned	Unassigned	Unassigned
ASV692	0	125	0	0	0	0	0	0	0	0	0	0	0	0	0	0	0	125	Bacteria{superkingdom}(100);Actinobacteria{phylum}(100);Actinobacteria{class}(100);Actinomycetales{order}(100);Streptomycetaceae{family}(100);Streptomyces{genus}(100);Unassigned{species}(0)	Bacteria	Actinobacteria	Actinobacteria	Actinomycetales	Streptomycetaceae	Streptomyces	Unassigned
ASV693	0	39	0	52	0	57	0	0	0	80	0	70	43	96	160	84	89	770	Bacteria{superkingdom}(100);Proteobacteria{phylum}(100);Betaproteobacteria{class}(100);{order}(100);{family}(100);{genus}(100);Unassigned{species}(0)	Bacteria	Proteobacteria	Betaproteobacteria				Unassigned
ASV694	49	78	58	38	27	34	140	61	84	50	17	44	27	83	48	66	107	1011	Bacteria{superkingdom}(89);{phylum}(89);{class}(89);{order}(89);{family}(89);{genus}(89);uncultured_Heliobacterium_sp.{species}(89)	Bacteria						uncultured_Heliobacterium_sp.
ASV695	29	0	38	124	161	74	0	0	0	0	8	0	9	0	0	0	0	443	Bacteria{superkingdom}(100);Proteobacteria{phylum}(100);Alphaproteobacteria{class}(100);Rhodospirillales{order}(100);Rhodospirillaceae{family}(100);Dongia{genus}(100);Unassigned{species}(0)	Bacteria	Proteobacteria	Alphaproteobacteria	Rhodospirillales	Rhodospirillaceae	Dongia	Unassigned
ASV696	36	4	4	0	33	0	0	0	8	0	0	1	0	0	0	0	0	86	Bacteria{superkingdom}(100);Proteobacteria{phylum}(100);Alphaproteobacteria{class}(100);Rhizobiales{order}(100);Unassigned{family}(0);Unassigned{genus}(0);Unassigned{species}(0)	Bacteria	Proteobacteria	Alphaproteobacteria	Rhizobiales	Unassigned	Unassigned	Unassigned
ASV697	169	32	45	0	0	0	0	0	54	50	0	0	0	0	0	0	35	385	Bacteria{superkingdom}(98);Acidobacteria{phylum}(98);Acidobacteria_Gp16{class}(98);{order}(98);{family}(98);Gp16{genus}(98);uncultured_bacterium{species}(98)	Bacteria	Acidobacteria	Acidobacteria_Gp16			Gp16	uncultured_bacterium
ASV698	35	0	4	25	199	0	0	0	0	0	0	0	0	0	0	0	0	263	Bacteria{superkingdom}(91);Proteobacteria{phylum}(91);Alphaproteobacteria{class}(91);Rhizobiales{order}(91);Phyllobacteriaceae{family}(91);Phyllobacterium{genus}(91);Phyllobacterium_ifriqiyense{species}(91)	Bacteria	Proteobacteria	Alphaproteobacteria	Rhizobiales	Phyllobacteriaceae	Phyllobacterium	Phyllobacterium_ifriqiyense
ASV699	61	0	51	52	24	95	42	44	15	38	28	0	130	42	61	47	79	809	Bacteria{superkingdom}(88);Chloroflexi{phylum}(88);{class}(88);{order}(88);{family}(88);{genus}(88);Unassigned{species}(0)	Bacteria	Chloroflexi					Unassigned
ASV700	27	0	29	86	27	148	30	0	0	0	0	0	65	0	0	0	26	438	Bacteria{superkingdom}(100);Acidobacteria{phylum}(100);Acidobacteria_Gp6{class}(100);{order}(100);{family}(100);Gp6{genus}(100);Unassigned{species}(0)	Bacteria	Acidobacteria	Acidobacteria_Gp6			Gp6	Unassigned
ASV701	36	18	69	0	130	0	0	9	0	0	0	0	0	0	0	0	17	279	Bacteria{superkingdom}(100);Bacteroidetes{phylum}(100);Sphingobacteriia{class}(100);Sphingobacteriales{order}(100);Chitinophagaceae{family}(100);Unassigned{genus}(0);Unassigned{species}(0)	Bacteria	Bacteroidetes	Sphingobacteriia	Sphingobacteriales	Chitinophagaceae	Unassigned	Unassigned
ASV702	113	0	72	75	65	0	0	16	0	0	0	0	0	0	0	20	0	361	Bacteria{superkingdom}(98);Proteobacteria{phylum}(98);Alphaproteobacteria{class}(98);Rhizobiales{order}(98);Rhizobiaceae{family}(98);Shinella{genus}(98);Unassigned{species}(0)	Bacteria	Proteobacteria	Alphaproteobacteria	Rhizobiales	Rhizobiaceae	Shinella	Unassigned
ASV703	32	21	39	47	42	43	2	0	0	0	0	12	0	14	0	0	21	273	Bacteria{superkingdom}(99);Proteobacteria{phylum}(99);Alphaproteobacteria{class}(99);Rhizobiales{order}(99);Phyllobacteriaceae{family}(99);Mesorhizobium{genus}(99);Unassigned{species}(0)	Bacteria	Proteobacteria	Alphaproteobacteria	Rhizobiales	Phyllobacteriaceae	Mesorhizobium	Unassigned
ASV704	19	0	27	16	0	48	0	0	0	0	0	0	0	0	0	0	0	110	Bacteria{superkingdom}(100);Armatimonadetes{phylum}(100);{class}(100);{order}(100);{family}(100);Armatimonadetes_gp4{genus}(100);Unassigned{species}(0)	Bacteria	Armatimonadetes				Armatimonadetes_gp4	Unassigned
ASV705	0	0	20	0	1111	106	52	17	43	0	0	0	0	0	0	35	0	1384	Bacteria{superkingdom}(86);Bacteroidetes{phylum}(86);Sphingobacteriia{class}(86);Sphingobacteriales{order}(86);Chitinophagaceae{family}(86);Taibaiella{genus}(86);Unassigned{species}(0)	Bacteria	Bacteroidetes	Sphingobacteriia	Sphingobacteriales	Chitinophagaceae	Taibaiella	Unassigned
ASV706	0	87	82	63	19	70	37	0	0	0	0	0	0	0	0	0	0	358	Bacteria{superkingdom}(100);Acidobacteria{phylum}(100);Acidobacteria_Gp6{class}(100);{order}(100);{family}(100);Gp6{genus}(100);Unassigned{species}(0)	Bacteria	Acidobacteria	Acidobacteria_Gp6			Gp6	Unassigned
ASV707	255	0	773	23	47	142	0	0	0	0	0	0	395	0	0	0	10	1645	Bacteria{superkingdom}(100);{phylum}(100);{class}(100);{order}(100);{family}(100);{genus}(100);uncultured_Gemmatimonadetes_bacterium{species}(100)	Bacteria						uncultured_Gemmatimonadetes_bacterium
ASV708	109	0	291	111	142	108	0	0	0	0	24	0	132	0	0	0	0	917	Bacteria{superkingdom}(100);Actinobacteria{phylum}(100);Actinobacteria{class}(100);Acidimicrobiales{order}(100);Unassigned{family}(0);Unassigned{genus}(0);Unassigned{species}(0)	Bacteria	Actinobacteria	Actinobacteria	Acidimicrobiales	Unassigned	Unassigned	Unassigned
ASV709	54	0	232	0	36	26	190	62	50	114	20	0	0	0	0	0	0	784	Bacteria{superkingdom}(100);Actinobacteria{phylum}(100);Actinobacteria{class}(100);Gaiellales{order}(100);Gaiellaceae{family}(100);Gaiella{genus}(100);Unassigned{species}(0)	Bacteria	Actinobacteria	Actinobacteria	Gaiellales	Gaiellaceae	Gaiella	Unassigned
ASV710	0	33	10	0	0	0	0	0	0	0	0	0	0	0	0	0	0	43	Bacteria{superkingdom}(96);Actinobacteria{phylum}(96);Actinobacteria{class}(96);Actinomycetales{order}(96);Pseudonocardiaceae{family}(96);Amycolatopsis{genus}(96);Unassigned{species}(0)	Bacteria	Actinobacteria	Actinobacteria	Actinomycetales	Pseudonocardiaceae	Amycolatopsis	Unassigned
ASV711	54	0	0	34	0	0	0	0	27	107	0	14	0	48	36	26	4	350	Bacteria{superkingdom}(100);Firmicutes{phylum}(100);Bacilli{class}(100);Bacillales{order}(100);Bacillaceae_1{family}(100);Domibacillus{genus}(100);Unassigned{species}(0)	Bacteria	Firmicutes	Bacilli	Bacillales	Bacillaceae_1	Domibacillus	Unassigned
ASV713	63	12	60	0	68	64	72	90	21	0	20	36	0	0	0	0	32	538	Bacteria{superkingdom}(94);Chloroflexi{phylum}(94);{class}(94);{order}(94);{family}(94);{genus}(94);Unassigned{species}(0)	Bacteria	Chloroflexi					Unassigned
ASV714	0	145	40	0	27	0	0	58	53	80	0	0	0	0	0	12	0	415	Bacteria{superkingdom}(98);Proteobacteria{phylum}(98);Betaproteobacteria{class}(98);{order}(98);{family}(98);{genus}(98);Unassigned{species}(0)	Bacteria	Proteobacteria	Betaproteobacteria				Unassigned
ASV715	38	30	39	27	21	27	103	72	40	65	0	66	64	131	69	48	66	906	Bacteria{superkingdom}(100);Proteobacteria{phylum}(100);Betaproteobacteria{class}(100);Burkholderiales{order}(100);Burkholderiaceae{family}(100);Ralstonia{genus}(100);Unassigned{species}(0)	Bacteria	Proteobacteria	Betaproteobacteria	Burkholderiales	Burkholderiaceae	Ralstonia	Unassigned
ASV716	32	0	38	48	15	0	21	16	18	78	18	34	5	0	54	19	0	396	Bacteria{superkingdom}(100);Actinobacteria{phylum}(100);Actinobacteria{class}(100);Actinomycetales{order}(100);Nocardioidaceae{family}(100);Nocardioides{genus}(100);Unassigned{species}(0)	Bacteria	Actinobacteria	Actinobacteria	Actinomycetales	Nocardioidaceae	Nocardioides	Unassigned
ASV717	69	0	48	0	27	54	0	0	0	0	0	0	73	0	33	45	0	349	Bacteria{superkingdom}(85);Actinobacteria{phylum}(85);Actinobacteria{class}(85);Solirubrobacterales{order}(85);Solirubrobacteraceae{family}(85);Solirubrobacter{genus}(85);uncultured_bacterium{species}(85)	Bacteria	Actinobacteria	Actinobacteria	Solirubrobacterales	Solirubrobacteraceae	Solirubrobacter	uncultured_bacterium
ASV718	83	0	106	182	136	176	136	14	21	26	23	0	0	0	52	0	18	973	Bacteria{superkingdom}(100);Firmicutes{phylum}(100);Bacilli{class}(100);Bacillales{order}(100);Paenibacillaceae_1{family}(100);Paenibacillus{genus}(100);Unassigned{species}(0)	Bacteria	Firmicutes	Bacilli	Bacillales	Paenibacillaceae_1	Paenibacillus	Unassigned
ASV719	64	13	84	30	27	41	30	13	25	27	36	0	0	0	0	0	26	416	Bacteria{superkingdom}(100);Verrucomicrobia{phylum}(100);Verrucomicrobiae{class}(100);Verrucomicrobiales{order}(100);Verrucomicrobiaceae{family}(100);{genus}(100);uncultured_Haloferula_sp.{species}(100)	Bacteria	Verrucomicrobia	Verrucomicrobiae	Verrucomicrobiales	Verrucomicrobiaceae		uncultured_Haloferula_sp.
ASV720	114	0	77	39	13	0	37	0	20	21	10	29	105	69	27	15	187	763	Bacteria{superkingdom}(99);Actinobacteria{phylum}(99);Actinobacteria{class}(99);Actinomycetales{order}(99);Nocardioidaceae{family}(99);Aeromicrobium{genus}(99);Unassigned{species}(0)	Bacteria	Actinobacteria	Actinobacteria	Actinomycetales	Nocardioidaceae	Aeromicrobium	Unassigned
ASV721	26	0	0	0	0	0	45	0	0	0	0	0	0	0	0	34	0	105	Bacteria{superkingdom}(99);Actinobacteria{phylum}(99);Actinobacteria{class}(99);Solirubrobacterales{order}(99);Conexibacteraceae{family}(99);Conexibacter{genus}(99);Unassigned{species}(0)	Bacteria	Actinobacteria	Actinobacteria	Solirubrobacterales	Conexibacteraceae	Conexibacter	Unassigned
ASV722	0	0	29	0	62	57	0	13	16	0	0	8	12	0	0	0	0	197	Bacteria{superkingdom}(97);Planctomycetes{phylum}(97);Planctomycetia{class}(97);Planctomycetales{order}(97);Planctomycetaceae{family}(97);Blastopirellula{genus}(97);Unassigned{species}(0)	Bacteria	Planctomycetes	Planctomycetia	Planctomycetales	Planctomycetaceae	Blastopirellula	Unassigned
ASV723	0	18	0	44	473	35	51	20	66	0	0	0	0	0	0	0	0	707	Bacteria{superkingdom}(100);Unassigned{phylum}(0);Unassigned{class}(0);Unassigned{order}(0);Unassigned{family}(0);Unassigned{genus}(0);Unassigned{species}(0)	Bacteria	Unassigned	Unassigned	Unassigned	Unassigned	Unassigned	Unassigned
ASV724	12	14	33	88	19	0	68	50	64	90	31	49	0	74	76	70	74	812	Bacteria{superkingdom}(98);Proteobacteria{phylum}(98);Deltaproteobacteria{class}(98);Myxococcales{order}(98);{family}(98);{genus}(98);Unassigned{species}(0)	Bacteria	Proteobacteria	Deltaproteobacteria	Myxococcales			Unassigned
ASV726	37	63	23	24	20	0	14	94	73	89	0	91	15	128	215	168	80	1134	Bacteria{superkingdom}(87);Actinobacteria{phylum}(87);Actinobacteria{class}(87);Actinomycetales{order}(87);Geodermatophilaceae{family}(87);Blastococcus{genus}(87);Unassigned{species}(0)	Bacteria	Actinobacteria	Actinobacteria	Actinomycetales	Geodermatophilaceae	Blastococcus	Unassigned
ASV727	0	0	0	0	30	0	0	0	0	0	0	0	0	0	0	0	0	30	Bacteria{superkingdom}(100);Bacteroidetes{phylum}(100);Cytophagia{class}(100);Cytophagales{order}(100);{family}(100);Ohtaekwangia{genus}(100);Unassigned{species}(0)	Bacteria	Bacteroidetes	Cytophagia	Cytophagales		Ohtaekwangia	Unassigned
ASV728	23	63	20	41	40	27	0	28	41	63	0	30	0	10	29	15	0	430	Bacteria{superkingdom}(92);Actinobacteria{phylum}(92);Actinobacteria{class}(92);Solirubrobacterales{order}(92);{family}(92);{genus}(92);Unassigned{species}(0)	Bacteria	Actinobacteria	Actinobacteria	Solirubrobacterales			Unassigned
ASV729	5	0	0	0	72	32	0	0	0	0	0	0	11	0	0	0	0	120	Bacteria{superkingdom}(99);Planctomycetes{phylum}(99);Planctomycetia{class}(99);Planctomycetales{order}(99);Planctomycetaceae{family}(99);{genus}(99);uncultured_Planctomyces_sp.{species}(99)	Bacteria	Planctomycetes	Planctomycetia	Planctomycetales	Planctomycetaceae		uncultured_Planctomyces_sp.
ASV730	41	44	29	41	39	26	17	0	0	49	39	40	22	23	18	17	71	516	Bacteria{superkingdom}(83);Proteobacteria{phylum}(83);Alphaproteobacteria{class}(83);Rhizobiales{order}(83);Rhizobiales_incertae_sedis{family}(83);Vasilyevaea{genus}(83);uncultured_bacterium{species}(83)	Bacteria	Proteobacteria	Alphaproteobacteria	Rhizobiales	Rhizobiales_incertae_sedis	Vasilyevaea	uncultured_bacterium
ASV731	0	0	61	58	91	47	0	0	9	0	0	2	0	0	0	0	0	268	Bacteria{superkingdom}(96);Candidatus_Saccharibacteria{phylum}(96);{class}(96);{order}(96);{family}(96);Saccharibacteria_genera_incertae_sedis{genus}(96);uncultured_candidate_division_TM7_bacterium{species}(96)	Bacteria	Candidatus_Saccharibacteria				Saccharibacteria_genera_incertae_sedis	uncultured_candidate_division_TM7_bacterium
ASV732	82	42	32	54	31	0	23	43	28	59	0	72	116	83	92	65	73	895	Bacteria{superkingdom}(86);Actinobacteria{phylum}(86);Actinobacteria{class}(86);{order}(86);{family}(86);{genus}(86);Unassigned{species}(0)	Bacteria	Actinobacteria	Actinobacteria				Unassigned
ASV733	30	14	0	32	27	17	12	18	0	13	0	0	10	16	54	0	14	257	Bacteria{superkingdom}(91);Bacteroidetes{phylum}(91);Sphingobacteriia{class}(91);Sphingobacteriales{order}(91);Chitinophagaceae{family}(91);{genus}(91);uncultured_Cytophaga_sp.{species}(91)	Bacteria	Bacteroidetes	Sphingobacteriia	Sphingobacteriales	Chitinophagaceae		uncultured_Cytophaga_sp.
ASV734	13	0	3	0	17	19	0	0	0	0	4	0	50	0	0	0	0	106	Bacteria{superkingdom}(100);Unassigned{phylum}(0);Unassigned{class}(0);Unassigned{order}(0);Unassigned{family}(0);Unassigned{genus}(0);Unassigned{species}(0)	Bacteria	Unassigned	Unassigned	Unassigned	Unassigned	Unassigned	Unassigned
ASV735	57	0	12	18	30	0	20	32	101	117	59	101	70	21	142	120	42	942	Bacteria{superkingdom}(92);Proteobacteria{phylum}(92);Betaproteobacteria{class}(92);Burkholderiales{order}(92);Comamonadaceae{family}(92);Ramlibacter{genus}(92);Unassigned{species}(0)	Bacteria	Proteobacteria	Betaproteobacteria	Burkholderiales	Comamonadaceae	Ramlibacter	Unassigned
ASV736	31	0	29	0	0	89	0	0	0	0	0	0	0	0	0	43	0	192	Bacteria{superkingdom}(100);Chloroflexi{phylum}(100);Thermomicrobia{class}(100);Sphaerobacterales{order}(100);Sphaerobacteraceae{family}(100);Unassigned{genus}(0);Unassigned{species}(0)	Bacteria	Chloroflexi	Thermomicrobia	Sphaerobacterales	Sphaerobacteraceae	Unassigned	Unassigned
ASV737	0	0	0	28	0	0	0	0	0	0	0	0	0	0	0	0	0	28	Bacteria{superkingdom}(94);Actinobacteria{phylum}(94);Actinobacteria{class}(94);Actinomycetales{order}(94);Pseudonocardiaceae{family}(94);Amycolatopsis{genus}(94);Unassigned{species}(0)	Bacteria	Actinobacteria	Actinobacteria	Actinomycetales	Pseudonocardiaceae	Amycolatopsis	Unassigned
ASV738	0	0	0	0	31	0	0	0	7	0	0	29	0	0	60	41	0	168	Bacteria{superkingdom}(100);Bacteroidetes{phylum}(100);Sphingobacteriia{class}(100);Sphingobacteriales{order}(100);Chitinophagaceae{family}(100);{genus}(100);Unassigned{species}(0)	Bacteria	Bacteroidetes	Sphingobacteriia	Sphingobacteriales	Chitinophagaceae		Unassigned
ASV739	0	0	0	0	0	0	0	0	0	0	0	147	0	0	0	15	0	162	Bacteria{superkingdom}(100);Bacteroidetes{phylum}(100);Cytophagia{class}(100);Cytophagales{order}(100);Cytophagaceae{family}(100);Adhaeribacter{genus}(100);Unassigned{species}(0)	Bacteria	Bacteroidetes	Cytophagia	Cytophagales	Cytophagaceae	Adhaeribacter	Unassigned
ASV740	58	0	29	86	94	0	0	0	0	0	0	0	0	18	0	0	0	285	Bacteria{superkingdom}(84);Proteobacteria{phylum}(84);Alphaproteobacteria{class}(84);Rhizobiales{order}(84);Hyphomicrobiaceae{family}(84);Pedomicrobium{genus}(84);uncultured_alpha_proteobacterium{species}(84)	Bacteria	Proteobacteria	Alphaproteobacteria	Rhizobiales	Hyphomicrobiaceae	Pedomicrobium	uncultured_alpha_proteobacterium
ASV741	0	39	0	0	55	42	0	0	0	0	0	0	0	0	0	0	0	136	Bacteria{superkingdom}(100);Cyanobacteria/Chloroplast{phylum}(100);Cyanobacteria{class}(100);{order}(100);Unassigned{family}(0);Unassigned{genus}(0);Unassigned{species}(0)	Bacteria	Cyanobacteria/Chloroplast	Cyanobacteria		Unassigned	Unassigned	Unassigned
ASV742	0	0	0	0	0	292	0	0	0	0	0	0	0	0	0	0	0	292	Bacteria{superkingdom}(97);Actinobacteria{phylum}(97);Actinobacteria{class}(97);Actinomycetales{order}(97);Pseudonocardiaceae{family}(97);Saccharopolyspora{genus}(97);Saccharopolyspora_erythraea{species}(97)	Bacteria	Actinobacteria	Actinobacteria	Actinomycetales	Pseudonocardiaceae	Saccharopolyspora	Saccharopolyspora_erythraea
ASV743	27	0	28	53	58	75	0	0	0	0	0	0	0	0	0	0	0	241	Bacteria{superkingdom}(100);Proteobacteria{phylum}(100);Alphaproteobacteria{class}(100);Rhizobiales{order}(100);Unassigned{family}(0);Unassigned{genus}(0);Unassigned{species}(0)	Bacteria	Proteobacteria	Alphaproteobacteria	Rhizobiales	Unassigned	Unassigned	Unassigned
ASV744	9	15	9	0	10	0	127	399	214	173	110	57	95	27	46	15	276	1582	Bacteria{superkingdom}(97);{phylum}(97);{class}(97);{order}(97);{family}(97);{genus}(97);uncultured_Gemmatimonadetes_bacterium{species}(97)	Bacteria						uncultured_Gemmatimonadetes_bacterium
ASV745	44	0	39	36	100	38	0	0	0	0	0	27	31	40	0	10	24	389	Bacteria{superkingdom}(99);Planctomycetes{phylum}(99);Planctomycetia{class}(99);Planctomycetales{order}(99);Planctomycetaceae{family}(99);{genus}(99);Planctomycetaceae_bacterium_LX124{species}(99)	Bacteria	Planctomycetes	Planctomycetia	Planctomycetales	Planctomycetaceae		Planctomycetaceae_bacterium_LX124
ASV746	88	0	23	51	53	216	0	0	0	0	0	0	22	0	0	10	0	463	Bacteria{superkingdom}(100);Planctomycetes{phylum}(100);Planctomycetia{class}(100);Planctomycetales{order}(100);Planctomycetaceae{family}(100);Singulisphaera{genus}(100);Unassigned{species}(0)	Bacteria	Planctomycetes	Planctomycetia	Planctomycetales	Planctomycetaceae	Singulisphaera	Unassigned
ASV747	0	0	0	0	0	130	0	0	0	0	0	0	0	0	0	5	0	135	Bacteria{superkingdom}(100);Chloroflexi{phylum}(100);Caldilineae{class}(100);Caldilineales{order}(100);Caldilineaceae{family}(100);Litorilinea{genus}(100);uncultured_Litorilinea_sp.{species}(100)	Bacteria	Chloroflexi	Caldilineae	Caldilineales	Caldilineaceae	Litorilinea	uncultured_Litorilinea_sp.
ASV748	74	0	0	0	0	21	36	0	0	0	0	0	0	0	0	0	35	166	Bacteria{superkingdom}(100);Proteobacteria{phylum}(100);Alphaproteobacteria{class}(100);Rhizobiales{order}(100);Unassigned{family}(0);Unassigned{genus}(0);Unassigned{species}(0)	Bacteria	Proteobacteria	Alphaproteobacteria	Rhizobiales	Unassigned	Unassigned	Unassigned
ASV749	0	0	14	17	50	0	6	0	0	0	0	141	38	61	53	40	12	432	Bacteria{superkingdom}(95);Proteobacteria{phylum}(95);Gammaproteobacteria{class}(95);{order}(95);{family}(95);{genus}(95);uncultured_Saccharophagus_sp.{species}(95)	Bacteria	Proteobacteria	Gammaproteobacteria				uncultured_Saccharophagus_sp.
ASV750	0	0	0	0	0	0	0	77	201	0	0	61	0	0	0	0	0	339	Bacteria{superkingdom}(95);Bacteroidetes{phylum}(95);Sphingobacteriia{class}(95);Sphingobacteriales{order}(95);Chitinophagaceae{family}(95);{genus}(95);Unassigned{species}(0)	Bacteria	Bacteroidetes	Sphingobacteriia	Sphingobacteriales	Chitinophagaceae		Unassigned
ASV751	0	0	0	66	0	78	0	0	0	0	0	0	0	0	0	0	0	144	Bacteria{superkingdom}(100);Actinobacteria{phylum}(100);Actinobacteria{class}(100);Actinomycetales{order}(100);Pseudonocardiaceae{family}(100);Amycolatopsis{genus}(100);Unassigned{species}(0)	Bacteria	Actinobacteria	Actinobacteria	Actinomycetales	Pseudonocardiaceae	Amycolatopsis	Unassigned
ASV752	113	30	27	0	59	34	0	66	73	0	0	54	67	0	0	0	0	523	Bacteria{superkingdom}(100);Proteobacteria{phylum}(100);Alphaproteobacteria{class}(100);Rhizobiales{order}(100);Unassigned{family}(0);Unassigned{genus}(0);Unassigned{species}(0)	Bacteria	Proteobacteria	Alphaproteobacteria	Rhizobiales	Unassigned	Unassigned	Unassigned
ASV753	68	0	0	0	0	0	0	0	0	0	0	0	0	0	0	0	60	128	Bacteria{superkingdom}(100);Proteobacteria{phylum}(100);Alphaproteobacteria{class}(100);Rhizobiales{order}(100);Rhodobiaceae{family}(100);Unassigned{genus}(0);Unassigned{species}(0)	Bacteria	Proteobacteria	Alphaproteobacteria	Rhizobiales	Rhodobiaceae	Unassigned	Unassigned
ASV754	49	0	49	31	95	65	0	0	14	8	0	0	0	21	6	0	36	374	Bacteria{superkingdom}(98);Proteobacteria{phylum}(98);Alphaproteobacteria{class}(98);Rhizobiales{order}(98);Phyllobacteriaceae{family}(98);Mesorhizobium{genus}(98);Unassigned{species}(0)	Bacteria	Proteobacteria	Alphaproteobacteria	Rhizobiales	Phyllobacteriaceae	Mesorhizobium	Unassigned
ASV755	281	59	82	267	985	112	0	0	0	0	0	0	0	0	0	0	83	1869	Bacteria{superkingdom}(100);Verrucomicrobia{phylum}(100);Opitutae{class}(100);Opitutales{order}(100);Opitutaceae{family}(100);Opitutus{genus}(100);Unassigned{species}(0)	Bacteria	Verrucomicrobia	Opitutae	Opitutales	Opitutaceae	Opitutus	Unassigned
ASV756	65	0	47	0	74	80	36	0	50	0	0	0	0	28	0	348	0	728	Bacteria{superkingdom}(100);Actinobacteria{phylum}(100);Actinobacteria{class}(100);Actinomycetales{order}(100);Nocardioidaceae{family}(100);Nocardioides{genus}(100);Unassigned{species}(0)	Bacteria	Actinobacteria	Actinobacteria	Actinomycetales	Nocardioidaceae	Nocardioides	Unassigned
ASV757	51	0	19	48	0	29	26	107	90	91	9	39	32	70	63	144	106	924	Bacteria{superkingdom}(86);Chloroflexi{phylum}(86);Thermomicrobia{class}(86);Sphaerobacterales{order}(86);Sphaerobacteraceae{family}(86);{genus}(86);Unassigned{species}(0)	Bacteria	Chloroflexi	Thermomicrobia	Sphaerobacterales	Sphaerobacteraceae		Unassigned
ASV758	100	0	0	160	50	482	0	0	38	0	0	0	0	0	0	0	0	830	Bacteria{superkingdom}(92);Proteobacteria{phylum}(92);Oligoflexia{class}(92);Oligoflexales{order}(92);Oligoflexaceae{family}(92);Oligoflexus{genus}(92);uncultured_bacterium{species}(92)	Bacteria	Proteobacteria	Oligoflexia	Oligoflexales	Oligoflexaceae	Oligoflexus	uncultured_bacterium
ASV760	43	48	12	21	4	21	22	8	26	32	22	48	0	9	0	26	0	342	Bacteria{superkingdom}(100);Planctomycetes{phylum}(100);Planctomycetia{class}(100);Planctomycetales{order}(100);Planctomycetaceae{family}(100);{genus}(100);uncultured_Blastopirellula_sp.{species}(100)	Bacteria	Planctomycetes	Planctomycetia	Planctomycetales	Planctomycetaceae		uncultured_Blastopirellula_sp.
ASV761	64	20	56	0	32	42	70	97	58	61	7	74	42	0	0	0	23	646	Bacteria{superkingdom}(100);Proteobacteria{phylum}(100);Alphaproteobacteria{class}(100);Rhizobiales{order}(100);Hyphomicrobiaceae{family}(100);Pedomicrobium{genus}(100);Unassigned{species}(0)	Bacteria	Proteobacteria	Alphaproteobacteria	Rhizobiales	Hyphomicrobiaceae	Pedomicrobium	Unassigned
ASV762	0	0	0	0	101	10	0	0	0	0	0	0	0	0	9	6	0	126	Bacteria{superkingdom}(100);Proteobacteria{phylum}(100);Alphaproteobacteria{class}(100);Sphingomonadales{order}(100);Sphingomonadaceae{family}(100);Sphingopyxis{genus}(100);Unassigned{species}(0)	Bacteria	Proteobacteria	Alphaproteobacteria	Sphingomonadales	Sphingomonadaceae	Sphingopyxis	Unassigned
ASV763	42	0	35	29	29	30	80	100	88	70	22	64	45	89	105	49	50	927	Bacteria{superkingdom}(99);Actinobacteria{phylum}(99);Actinobacteria{class}(99);Gaiellales{order}(99);Gaiellaceae{family}(99);Gaiella{genus}(99);uncultured_Actinomycetales_bacterium{species}(99)	Bacteria	Actinobacteria	Actinobacteria	Gaiellales	Gaiellaceae	Gaiella	uncultured_Actinomycetales_bacterium
ASV764	0	0	0	14	0	10	0	0	0	0	17	38	15	92	83	100	51	420	Bacteria{superkingdom}(86);Verrucomicrobia{phylum}(86);Opitutae{class}(86);Opitutales{order}(86);Opitutaceae{family}(86);Opitutus{genus}(86);uncultured_Opitutaceae_bacterium{species}(86)	Bacteria	Verrucomicrobia	Opitutae	Opitutales	Opitutaceae	Opitutus	uncultured_Opitutaceae_bacterium
ASV765	6	0	0	0	3	7	0	0	0	0	0	0	0	0	0	0	0	16	Bacteria{superkingdom}(97);Chloroflexi{phylum}(97);Anaerolineae{class}(97);Anaerolineales{order}(97);Anaerolineaceae{family}(97);{genus}(97);Unassigned{species}(0)	Bacteria	Chloroflexi	Anaerolineae	Anaerolineales	Anaerolineaceae		Unassigned
ASV768	36	0	43	50	60	84	0	0	23	0	0	0	0	0	0	0	18	314	Bacteria{superkingdom}(82);Bacteroidetes{phylum}(82);Sphingobacteriia{class}(82);Sphingobacteriales{order}(82);Chitinophagaceae{family}(82);{genus}(82);uncultured_Chitinophagaceae_bacterium{species}(82)	Bacteria	Bacteroidetes	Sphingobacteriia	Sphingobacteriales	Chitinophagaceae		uncultured_Chitinophagaceae_bacterium
ASV769	0	0	0	20	0	0	0	0	0	0	0	68	0	23	12	4	8	135	Bacteria{superkingdom}(99);Proteobacteria{phylum}(99);Alphaproteobacteria{class}(99);Rhodospirillales{order}(99);{family}(99);{genus}(99);Unassigned{species}(0)	Bacteria	Proteobacteria	Alphaproteobacteria	Rhodospirillales			Unassigned
ASV770	26	22	49	55	55	53	0	0	0	0	0	0	0	0	0	0	0	260	Bacteria{superkingdom}(90);Planctomycetes{phylum}(90);Planctomycetia{class}(90);Planctomycetales{order}(90);Planctomycetaceae{family}(90);Pirellula{genus}(90);uncultured_Pirellula_sp.{species}(90)	Bacteria	Planctomycetes	Planctomycetia	Planctomycetales	Planctomycetaceae	Pirellula	uncultured_Pirellula_sp.
ASV771	0	0	34	12	41	48	0	0	0	0	0	0	0	20	0	6	0	161	Bacteria{superkingdom}(90);Armatimonadetes{phylum}(90);{class}(90);{order}(90);{family}(90);Armatimonadetes_gp5{genus}(90);uncultured_actinobacterium{species}(90)	Bacteria	Armatimonadetes				Armatimonadetes_gp5	uncultured_actinobacterium
ASV772	8	18	0	55	7	10	11	10	42	97	29	53	19	128	236	108	28	859	Bacteria{superkingdom}(88);Chloroflexi{phylum}(88);Chloroflexia{class}(88);Kallotenuales{order}(88);Kallotenuaceae{family}(88);Kallotenue{genus}(88);uncultured_soil_bacterium{species}(88)	Bacteria	Chloroflexi	Chloroflexia	Kallotenuales	Kallotenuaceae	Kallotenue	uncultured_soil_bacterium
ASV773	29	0	0	28	90	40	0	0	0	0	0	15	27	25	2	0	0	256	Bacteria{superkingdom}(100);Proteobacteria{phylum}(100);Alphaproteobacteria{class}(100);Rhizobiales{order}(100);Hyphomicrobiaceae{family}(100);Devosia{genus}(100);Unassigned{species}(0)	Bacteria	Proteobacteria	Alphaproteobacteria	Rhizobiales	Hyphomicrobiaceae	Devosia	Unassigned
ASV774	0	20	0	0	0	0	0	0	0	0	0	0	0	69	41	0	0	130	Bacteria{superkingdom}(100);Bacteroidetes{phylum}(100);Cytophagia{class}(100);Cytophagales{order}(100);{family}(100);Ohtaekwangia{genus}(100);Unassigned{species}(0)	Bacteria	Bacteroidetes	Cytophagia	Cytophagales		Ohtaekwangia	Unassigned
ASV775	0	0	0	0	0	0	12	0	38	0	0	0	0	0	0	0	0	50	Bacteria{superkingdom}(94);Proteobacteria{phylum}(94);Gammaproteobacteria{class}(94);{order}(94);{family}(94);{genus}(94);uncultured_Steroidobacter_sp.{species}(94)	Bacteria	Proteobacteria	Gammaproteobacteria				uncultured_Steroidobacter_sp.
ASV776	30	41	25	26	17	33	37	47	31	31	14	23	22	44	0	51	33	505	Bacteria{superkingdom}(100);Proteobacteria{phylum}(100);Gammaproteobacteria{class}(100);Enterobacteriales{order}(100);Enterobacteriaceae{family}(100);Escherichia/Shigella{genus}(100);Unassigned{species}(0)	Bacteria	Proteobacteria	Gammaproteobacteria	Enterobacteriales	Enterobacteriaceae	Escherichia/Shigella	Unassigned
ASV777	0	0	0	0	0	0	0	0	0	0	0	35	0	82	38	112	12	279	Bacteria{superkingdom}(100);Proteobacteria{phylum}(100);Alphaproteobacteria{class}(100);Rhodospirillales{order}(100);Rhodospirillaceae{family}(100);Skermanella{genus}(100);Unassigned{species}(0)	Bacteria	Proteobacteria	Alphaproteobacteria	Rhodospirillales	Rhodospirillaceae	Skermanella	Unassigned
ASV778	0	0	0	0	67	0	0	0	0	0	14	0	0	0	0	0	0	81	Bacteria{superkingdom}(99);Proteobacteria{phylum}(99);Gammaproteobacteria{class}(99);Pseudomonadales{order}(99);Pseudomonadaceae{family}(99);Pseudomonas{genus}(99);Unassigned{species}(0)	Bacteria	Proteobacteria	Gammaproteobacteria	Pseudomonadales	Pseudomonadaceae	Pseudomonas	Unassigned
ASV779	39	0	33	21	36	31	51	92	82	62	76	41	104	75	0	20	120	883	Bacteria{superkingdom}(94);Acidobacteria{phylum}(94);Acidobacteria_Gp3{class}(94);{order}(94);{family}(94);{genus}(94);uncultured_Candidatus_Solibacter_sp.{species}(94)	Bacteria	Acidobacteria	Acidobacteria_Gp3				uncultured_Candidatus_Solibacter_sp.
ASV780	0	0	63	0	29	16	107	0	44	0	9	35	0	0	0	0	0	303	Bacteria{superkingdom}(100);Chloroflexi{phylum}(100);Chloroflexia{class}(100);{order}(100);{family}(100);{genus}(100);Unassigned{species}(0)	Bacteria	Chloroflexi	Chloroflexia				Unassigned
ASV781	105	0	0	0	1261	0	0	0	0	28	0	9	0	0	0	0	0	1403	Bacteria{superkingdom}(96);Bacteroidetes{phylum}(96);Sphingobacteriia{class}(96);Sphingobacteriales{order}(96);Chitinophagaceae{family}(96);Taibaiella{genus}(96);uncultured_bacterium{species}(96)	Bacteria	Bacteroidetes	Sphingobacteriia	Sphingobacteriales	Chitinophagaceae	Taibaiella	uncultured_bacterium
ASV782	16	38	0	0	46	3	108	14	604	32	0	23	0	12	0	0	0	896	Bacteria{superkingdom}(100);Chloroflexi{phylum}(100);Chloroflexia{class}(100);Chloroflexales{order}(100);Oscillochloridaceae{family}(100);Oscillochloris{genus}(100);uncultured_bacterium{species}(100)	Bacteria	Chloroflexi	Chloroflexia	Chloroflexales	Oscillochloridaceae	Oscillochloris	uncultured_bacterium
ASV783	69	44	113	0	65	68	16	0	11	0	0	0	0	0	0	0	0	386	Bacteria{superkingdom}(84);Bacteroidetes{phylum}(84);Sphingobacteriia{class}(84);Sphingobacteriales{order}(84);Chitinophagaceae{family}(84);Cnuella{genus}(84);uncultured_Chitinophaga_sp.{species}(84)	Bacteria	Bacteroidetes	Sphingobacteriia	Sphingobacteriales	Chitinophagaceae	Cnuella	uncultured_Chitinophaga_sp.
ASV784	31	0	0	29	0	37	186	291	85	48	159	11	207	30	0	0	104	1218	Bacteria{superkingdom}(94);{phylum}(94);{class}(94);{order}(94);{family}(94);{genus}(94);uncultured_candidate_division_SPAM_bacterium{species}(94)	Bacteria						uncultured_candidate_division_SPAM_bacterium
ASV785	0	0	0	0	3	0	0	0	0	0	0	0	0	0	0	0	0	3	Bacteria{superkingdom}(94);Cyanobacteria/Chloroplast{phylum}(94);Cyanobacteria{class}(94);{order}(94);{family}(94);{genus}(94);Unassigned{species}(0)	Bacteria	Cyanobacteria/Chloroplast	Cyanobacteria				Unassigned
ASV786	51	9	0	0	741	13	0	0	9	7	0	0	33	0	3	0	7	873	Bacteria{superkingdom}(92);Bacteroidetes{phylum}(92);Flavobacteriia{class}(92);Flavobacteriales{order}(92);Cryomorphaceae{family}(92);{genus}(92);Unassigned{species}(0)	Bacteria	Bacteroidetes	Flavobacteriia	Flavobacteriales	Cryomorphaceae		Unassigned
ASV788	47	0	0	8	20	0	0	0	0	0	0	0	0	0	0	0	0	75	Bacteria{superkingdom}(84);Chloroflexi{phylum}(84);Chloroflexia{class}(84);Kallotenuales{order}(84);Kallotenuaceae{family}(84);Kallotenue{genus}(84);uncultured_bacterium{species}(84)	Bacteria	Chloroflexi	Chloroflexia	Kallotenuales	Kallotenuaceae	Kallotenue	uncultured_bacterium
ASV789	0	0	0	22	0	80	0	0	0	0	0	0	0	0	0	0	0	102	Bacteria{superkingdom}(100);Acidobacteria{phylum}(100);Acidobacteria_Gp7{class}(100);{order}(100);{family}(100);Gp7{genus}(100);Unassigned{species}(0)	Bacteria	Acidobacteria	Acidobacteria_Gp7			Gp7	Unassigned
ASV790	37	0	284	131	0	105	0	0	0	0	21	0	0	0	0	0	0	578	Bacteria{superkingdom}(100);Bacteroidetes{phylum}(100);Cytophagia{class}(100);Cytophagales{order}(100);{family}(100);Ohtaekwangia{genus}(100);Unassigned{species}(0)	Bacteria	Bacteroidetes	Cytophagia	Cytophagales		Ohtaekwangia	Unassigned
ASV791	59	0	50	53	44	38	75	35	0	81	78	0	40	70	0	42	0	665	Bacteria{superkingdom}(80);Acidobacteria{phylum}(80);{class}(80);{order}(80);{family}(80);{genus}(80);uncultured_microorganism{species}(80)	Bacteria	Acidobacteria					uncultured_microorganism
ASV792	0	0	0	16	0	1	0	0	0	0	0	33	0	81	0	0	0	131	Bacteria{superkingdom}(98);Actinobacteria{phylum}(98);Actinobacteria{class}(98);Solirubrobacterales{order}(98);Conexibacteraceae{family}(98);Conexibacter{genus}(98);uncultured_Rubrobacteraceae_bacterium{species}(98)	Bacteria	Actinobacteria	Actinobacteria	Solirubrobacterales	Conexibacteraceae	Conexibacter	uncultured_Rubrobacteraceae_bacterium
ASV793	54	0	54	68	70	83	0	0	0	0	0	0	0	0	0	0	11	340	Bacteria{superkingdom}(88);Proteobacteria{phylum}(88);Alphaproteobacteria{class}(88);Rhizobiales{order}(88);Hyphomicrobiaceae{family}(88);Blastochloris{genus}(88);uncultured_alpha_proteobacterium{species}(88)	Bacteria	Proteobacteria	Alphaproteobacteria	Rhizobiales	Hyphomicrobiaceae	Blastochloris	uncultured_alpha_proteobacterium
ASV794	21	0	0	53	0	0	0	41	0	41	0	40	0	0	20	0	0	216	Bacteria{superkingdom}(100);Bacteroidetes{phylum}(100);Sphingobacteriia{class}(100);Sphingobacteriales{order}(100);Chitinophagaceae{family}(100);Niastella{genus}(100);Unassigned{species}(0)	Bacteria	Bacteroidetes	Sphingobacteriia	Sphingobacteriales	Chitinophagaceae	Niastella	Unassigned
ASV795	93	80	0	0	0	116	0	0	0	0	0	0	0	0	0	0	0	289	Bacteria{superkingdom}(100);Actinobacteria{phylum}(100);Actinobacteria{class}(100);Actinomycetales{order}(100);Nocardioidaceae{family}(100);Nocardioides{genus}(100);Unassigned{species}(0)	Bacteria	Actinobacteria	Actinobacteria	Actinomycetales	Nocardioidaceae	Nocardioides	Unassigned
ASV796	61	0	58	41	13	47	1	0	0	0	0	0	30	0	0	0	0	251	Bacteria{superkingdom}(100);Acidobacteria{phylum}(100);Acidobacteria_Gp6{class}(100);{order}(100);{family}(100);Gp6{genus}(100);Unassigned{species}(0)	Bacteria	Acidobacteria	Acidobacteria_Gp6			Gp6	Unassigned
ASV797	58	0	43	76	43	71	0	0	19	0	0	0	12	35	88	55	57	557	Bacteria{superkingdom}(81);Proteobacteria{phylum}(81);Alphaproteobacteria{class}(81);Sphingomonadales{order}(81);Sphingomonadaceae{family}(81);Novosphingobium{genus}(81);Unassigned{species}(0)	Bacteria	Proteobacteria	Alphaproteobacteria	Sphingomonadales	Sphingomonadaceae	Novosphingobium	Unassigned
ASV798	15	13	0	14	0	0	0	28	21	29	0	21	28	45	170	69	14	467	Bacteria{superkingdom}(97);Acidobacteria{phylum}(97);{class}(97);{order}(97);{family}(97);{genus}(97);uncultured_Acidobacteriales_bacterium{species}(97)	Bacteria	Acidobacteria					uncultured_Acidobacteriales_bacterium
ASV799	44	17	34	0	21	0	0	0	0	0	0	23	0	50	14	36	0	239	Bacteria{superkingdom}(100);Actinobacteria{phylum}(100);Actinobacteria{class}(100);Actinomycetales{order}(100);Nocardioidaceae{family}(100);Nocardioides{genus}(100);Unassigned{species}(0)	Bacteria	Actinobacteria	Actinobacteria	Actinomycetales	Nocardioidaceae	Nocardioides	Unassigned
ASV800	57	9	30	93	50	25	6	7	6	0	5	0	18	13	17	0	0	336	Bacteria{superkingdom}(82);Actinobacteria{phylum}(82);Actinobacteria{class}(82);Actinomycetales{order}(82);Microbacteriaceae{family}(82);Lysinimonas{genus}(82);uncultured_Microbacteriaceae_bacterium{species}(82)	Bacteria	Actinobacteria	Actinobacteria	Actinomycetales	Microbacteriaceae	Lysinimonas	uncultured_Microbacteriaceae_bacterium
ASV801	18	0	0	0	0	45	0	0	0	0	0	0	0	0	0	0	0	63	Bacteria{superkingdom}(100);Acidobacteria{phylum}(100);Acidobacteria_Gp7{class}(100);{order}(100);{family}(100);Gp7{genus}(100);Unassigned{species}(0)	Bacteria	Acidobacteria	Acidobacteria_Gp7			Gp7	Unassigned
ASV802	0	39	0	0	0	0	0	0	0	0	0	114	82	91	143	165	69	703	Bacteria{superkingdom}(89);Proteobacteria{phylum}(89);Alphaproteobacteria{class}(89);Rhizobiales{order}(89);Methylobacteriaceae{family}(89);Microvirga{genus}(89);Unassigned{species}(0)	Bacteria	Proteobacteria	Alphaproteobacteria	Rhizobiales	Methylobacteriaceae	Microvirga	Unassigned
ASV803	16	0	45	102	13	121	194	25	11	0	75	29	200	22	0	39	95	987	Bacteria{superkingdom}(93);Acidobacteria{phylum}(93);Acidobacteria_Gp6{class}(93);{order}(93);{family}(93);Gp6{genus}(93);Unassigned{species}(0)	Bacteria	Acidobacteria	Acidobacteria_Gp6			Gp6	Unassigned
ASV804	0	221	0	0	0	0	0	0	0	88	0	29	0	0	0	0	0	338	Bacteria{superkingdom}(100);Acidobacteria{phylum}(100);Acidobacteria_Gp4{class}(100);{order}(100);{family}(100);Gp4{genus}(100);Unassigned{species}(0)	Bacteria	Acidobacteria	Acidobacteria_Gp4			Gp4	Unassigned
ASV805	0	0	0	5	0	57	0	0	0	0	8	1	0	0	20	0	0	91	Bacteria{superkingdom}(100);Verrucomicrobia{phylum}(100);Opitutae{class}(100);Opitutales{order}(100);Opitutaceae{family}(100);Opitutus{genus}(100);Unassigned{species}(0)	Bacteria	Verrucomicrobia	Opitutae	Opitutales	Opitutaceae	Opitutus	Unassigned
ASV806	0	0	0	0	0	205	0	0	0	0	0	0	0	0	0	0	0	205	Bacteria{superkingdom}(82);Bacteroidetes{phylum}(82);Sphingobacteriia{class}(82);Sphingobacteriales{order}(82);Chitinophagaceae{family}(82);Chitinophaga{genus}(82);uncultured_bacterium{species}(82)	Bacteria	Bacteroidetes	Sphingobacteriia	Sphingobacteriales	Chitinophagaceae	Chitinophaga	uncultured_bacterium
ASV807	34	17	87	0	21	66	34	64	14	11	12	14	43	0	33	0	176	626	Bacteria{superkingdom}(95);Chloroflexi{phylum}(95);{class}(95);{order}(95);{family}(95);{genus}(95);Unassigned{species}(0)	Bacteria	Chloroflexi					Unassigned
ASV808	47	0	22	0	24	0	0	129	35	74	0	58	0	0	0	0	0	389	Bacteria{superkingdom}(98);Proteobacteria{phylum}(98);Alphaproteobacteria{class}(98);Rhizobiales{order}(98);Rhodobiaceae{family}(98);Methyloceanibacter{genus}(98);Unassigned{species}(0)	Bacteria	Proteobacteria	Alphaproteobacteria	Rhizobiales	Rhodobiaceae	Methyloceanibacter	Unassigned
ASV809	100	0	35	0	153	86	0	0	0	0	0	0	0	0	0	0	0	374	Bacteria{superkingdom}(86);Planctomycetes{phylum}(86);Phycisphaerae{class}(86);Phycisphaerales{order}(86);Phycisphaeraceae{family}(86);Phycisphaera{genus}(86);uncultured_bacterium{species}(86)	Bacteria	Planctomycetes	Phycisphaerae	Phycisphaerales	Phycisphaeraceae	Phycisphaera	uncultured_bacterium
ASV810	46	0	65	54	58	0	0	0	0	0	33	0	0	0	0	0	0	256	Bacteria{superkingdom}(98);Firmicutes{phylum}(98);Bacilli{class}(98);Bacillales{order}(98);Paenibacillaceae_1{family}(98);Paenibacillus{genus}(98);Unassigned{species}(0)	Bacteria	Firmicutes	Bacilli	Bacillales	Paenibacillaceae_1	Paenibacillus	Unassigned
ASV811	0	0	61	0	12	0	0	0	397	281	0	52	0	0	79	0	0	882	Bacteria{superkingdom}(100);Bacteroidetes{phylum}(100);Sphingobacteriia{class}(100);Sphingobacteriales{order}(100);Chitinophagaceae{family}(100);Unassigned{genus}(0);Unassigned{species}(0)	Bacteria	Bacteroidetes	Sphingobacteriia	Sphingobacteriales	Chitinophagaceae	Unassigned	Unassigned
ASV812	0	0	36	0	0	0	0	0	6	0	2	0	0	0	0	5	0	49	Bacteria{superkingdom}(83);Candidatus_Saccharibacteria{phylum}(83);{class}(83);{order}(83);{family}(83);Saccharibacteria_genera_incertae_sedis{genus}(83);uncultured_bacterium{species}(83)	Bacteria	Candidatus_Saccharibacteria				Saccharibacteria_genera_incertae_sedis	uncultured_bacterium
ASV813	8	8	18	0	0	0	216	183	123	123	40	105	162	36	103	0	84	1209	Bacteria{superkingdom}(100);Unassigned{phylum}(0);Unassigned{class}(0);Unassigned{order}(0);Unassigned{family}(0);Unassigned{genus}(0);Unassigned{species}(0)	Bacteria	Unassigned	Unassigned	Unassigned	Unassigned	Unassigned	Unassigned
ASV814	24	0	0	0	0	110	0	0	0	0	0	0	0	0	0	0	0	134	Bacteria{superkingdom}(80);Proteobacteria{phylum}(80);Alphaproteobacteria{class}(80);Rhizobiales{order}(80);Hyphomicrobiaceae{family}(80);Unassigned{genus}(0);Unassigned{species}(0)	Bacteria	Proteobacteria	Alphaproteobacteria	Rhizobiales	Hyphomicrobiaceae	Unassigned	Unassigned
ASV815	62	81	33	26	30	37	50	25	32	34	21	11	47	25	0	11	32	557	Bacteria{superkingdom}(92);Proteobacteria{phylum}(92);Gammaproteobacteria{class}(92);Chromatiales{order}(92);Unassigned{family}(0);Unassigned{genus}(0);Unassigned{species}(0)	Bacteria	Proteobacteria	Gammaproteobacteria	Chromatiales	Unassigned	Unassigned	Unassigned
ASV816	13	13	4	0	0	0	23	36	32	77	39	58	225	172	53	99	258	1102	Bacteria{superkingdom}(99);Acidobacteria{phylum}(99);Acidobacteria_Gp16{class}(99);{order}(99);{family}(99);Gp16{genus}(99);Unassigned{species}(0)	Bacteria	Acidobacteria	Acidobacteria_Gp16			Gp16	Unassigned
ASV818	7	0	0	0	0	0	48	0	0	0	0	0	0	0	0	0	0	55	Bacteria{superkingdom}(88);Chloroflexi{phylum}(88);Anaerolineae{class}(88);Anaerolineales{order}(88);Anaerolineaceae{family}(88);{genus}(88);Unassigned{species}(0)	Bacteria	Chloroflexi	Anaerolineae	Anaerolineales	Anaerolineaceae		Unassigned
ASV819	130	11	145	0	61	79	0	0	0	0	0	0	0	0	0	0	0	426	Bacteria{superkingdom}(100);Proteobacteria{phylum}(100);Betaproteobacteria{class}(100);Burkholderiales{order}(100);Burkholderiaceae{family}(100);Cupriavidus{genus}(100);Unassigned{species}(0)	Bacteria	Proteobacteria	Betaproteobacteria	Burkholderiales	Burkholderiaceae	Cupriavidus	Unassigned
ASV820	27	29	23	17	18	14	57	26	56	39	61	25	49	50	39	23	0	553	Bacteria{superkingdom}(100);Proteobacteria{phylum}(100);Betaproteobacteria{class}(100);Burkholderiales{order}(100);Burkholderiaceae{family}(100);Ralstonia{genus}(100);Unassigned{species}(0)	Bacteria	Proteobacteria	Betaproteobacteria	Burkholderiales	Burkholderiaceae	Ralstonia	Unassigned
ASV821	11	13	0	18	0	0	0	0	0	44	17	73	0	34	0	49	0	259	Bacteria{superkingdom}(97);Actinobacteria{phylum}(97);Actinobacteria{class}(97);Actinomycetales{order}(97);Mycobacteriaceae{family}(97);Mycobacterium{genus}(97);Unassigned{species}(0)	Bacteria	Actinobacteria	Actinobacteria	Actinomycetales	Mycobacteriaceae	Mycobacterium	Unassigned
ASV822	0	108	0	0	0	29	0	15	0	21	20	25	0	0	0	26	7	251	Bacteria{superkingdom}(100);Unassigned{phylum}(0);Unassigned{class}(0);Unassigned{order}(0);Unassigned{family}(0);Unassigned{genus}(0);Unassigned{species}(0)	Bacteria	Unassigned	Unassigned	Unassigned	Unassigned	Unassigned	Unassigned
ASV823	86	29	0	0	23	0	0	0	0	0	0	0	0	0	0	59	0	197	Bacteria{superkingdom}(92);Actinobacteria{phylum}(92);Actinobacteria{class}(92);Actinomycetales{order}(92);Nocardioidaceae{family}(92);Nocardioides{genus}(92);uncultured_Actinomyces_sp.{species}(92)	Bacteria	Actinobacteria	Actinobacteria	Actinomycetales	Nocardioidaceae	Nocardioides	uncultured_Actinomyces_sp.
ASV824	0	45	0	0	0	0	0	0	28	170	0	0	0	0	0	0	0	243	Bacteria{superkingdom}(97);Chloroflexi{phylum}(97);Chloroflexia{class}(97);{order}(97);{family}(97);{genus}(97);uncultured_bacterium{species}(97)	Bacteria	Chloroflexi	Chloroflexia				uncultured_bacterium
ASV825	41	102	0	0	31	0	45	288	172	68	0	53	0	0	0	0	0	800	Bacteria{superkingdom}(99);Chloroflexi{phylum}(99);Caldilineae{class}(99);Caldilineales{order}(99);Caldilineaceae{family}(99);Litorilinea{genus}(99);uncultured_Litorilinea_sp.{species}(99)	Bacteria	Chloroflexi	Caldilineae	Caldilineales	Caldilineaceae	Litorilinea	uncultured_Litorilinea_sp.
ASV826	0	15	18	16	0	21	0	0	14	12	14	0	0	77	59	25	0	271	Bacteria{superkingdom}(100);Actinobacteria{phylum}(100);Actinobacteria{class}(100);Actinomycetales{order}(100);Microbacteriaceae{family}(100);Unassigned{genus}(0);Unassigned{species}(0)	Bacteria	Actinobacteria	Actinobacteria	Actinomycetales	Microbacteriaceae	Unassigned	Unassigned
ASV828	50	0	47	37	0	128	0	0	0	22	0	0	0	0	0	341	368	993	Bacteria{superkingdom}(95);Acidobacteria{phylum}(95);Acidobacteria_Gp16{class}(95);{order}(95);{family}(95);Gp16{genus}(95);uncultured_Chloroflexi_bacterium{species}(95)	Bacteria	Acidobacteria	Acidobacteria_Gp16			Gp16	uncultured_Chloroflexi_bacterium
ASV830	0	12	0	0	0	0	0	0	0	0	0	0	0	0	0	0	0	12	Bacteria{superkingdom}(100);Bacteroidetes{phylum}(100);Cytophagia{class}(100);Cytophagales{order}(100);Cytophagaceae{family}(100);Adhaeribacter{genus}(100);Unassigned{species}(0)	Bacteria	Bacteroidetes	Cytophagia	Cytophagales	Cytophagaceae	Adhaeribacter	Unassigned
ASV831	0	0	0	0	0	0	0	0	0	45	0	25	0	24	0	21	0	115	Bacteria{superkingdom}(100);Proteobacteria{phylum}(100);Gammaproteobacteria{class}(100);Xanthomonadales{order}(100);Sinobacteraceae{family}(100);Unassigned{genus}(0);Unassigned{species}(0)	Bacteria	Proteobacteria	Gammaproteobacteria	Xanthomonadales	Sinobacteraceae	Unassigned	Unassigned
ASV832	20	0	26	38	0	49	9	0	0	0	0	0	0	0	0	0	0	142	Bacteria{superkingdom}(100);candidate_division_WPS-1{phylum}(100);{class}(100);{order}(100);{family}(100);WPS-1_genera_incertae_sedis{genus}(100);Unassigned{species}(0)	Bacteria	candidate_division_WPS-1				WPS-1_genera_incertae_sedis	Unassigned
ASV833	54	0	13	72	38	97	0	0	0	0	0	0	64	0	0	46	32	416	Bacteria{superkingdom}(100);Proteobacteria{phylum}(100);Deltaproteobacteria{class}(100);Myxococcales{order}(100);{family}(100);{genus}(100);Unassigned{species}(0)	Bacteria	Proteobacteria	Deltaproteobacteria	Myxococcales			Unassigned
ASV834	52	29	12	16	26	12	29	8	0	0	0	28	0	0	0	0	0	212	Bacteria{superkingdom}(100);Actinobacteria{phylum}(100);Actinobacteria{class}(100);Actinomycetales{order}(100);Micromonosporaceae{family}(100);Unassigned{genus}(0);Unassigned{species}(0)	Bacteria	Actinobacteria	Actinobacteria	Actinomycetales	Micromonosporaceae	Unassigned	Unassigned
ASV835	42	0	38	23	31	58	0	10	0	21	0	0	29	0	9	14	19	294	Bacteria{superkingdom}(100);Proteobacteria{phylum}(100);Alphaproteobacteria{class}(100);Rhodospirillales{order}(100);{family}(100);{genus}(100);Unassigned{species}(0)	Bacteria	Proteobacteria	Alphaproteobacteria	Rhodospirillales			Unassigned
ASV836	33	0	0	0	0	132	24	0	0	0	0	0	0	0	0	0	0	189	Bacteria{superkingdom}(91);Proteobacteria{phylum}(91);Gammaproteobacteria{class}(91);Xanthomonadales{order}(91);Sinobacteraceae{family}(91);Steroidobacter{genus}(91);Unassigned{species}(0)	Bacteria	Proteobacteria	Gammaproteobacteria	Xanthomonadales	Sinobacteraceae	Steroidobacter	Unassigned
ASV837	0	27	0	0	0	0	16	0	0	0	21	51	0	0	0	0	0	115	Bacteria{superkingdom}(84);Planctomycetes{phylum}(84);Planctomycetia{class}(84);Planctomycetales{order}(84);Planctomycetaceae{family}(84);{genus}(84);Unassigned{species}(0)	Bacteria	Planctomycetes	Planctomycetia	Planctomycetales	Planctomycetaceae		Unassigned
ASV838	0	0	0	0	0	0	0	0	0	84	0	205	0	34	19	8	0	350	Bacteria{superkingdom}(100);Acidobacteria{phylum}(100);Acidobacteria_Gp4{class}(100);{order}(100);{family}(100);Gp4{genus}(100);Unassigned{species}(0)	Bacteria	Acidobacteria	Acidobacteria_Gp4			Gp4	Unassigned
ASV840	0	0	0	0	0	50	22	0	0	0	0	0	0	0	0	0	0	72	Bacteria{superkingdom}(82);{phylum}(82);{class}(82);{order}(82);{family}(82);{genus}(82);uncultured_Candidatus_Entotheonella_sp.{species}(82)	Bacteria						uncultured_Candidatus_Entotheonella_sp.
ASV841	75	0	57	25	77	30	33	34	26	59	30	58	17	46	37	35	76	715	Bacteria{superkingdom}(100);candidate_division_WPS-1{phylum}(100);{class}(100);{order}(100);{family}(100);WPS-1_genera_incertae_sedis{genus}(100);Unassigned{species}(0)	Bacteria	candidate_division_WPS-1				WPS-1_genera_incertae_sedis	Unassigned
ASV842	71	0	27	23	22	155	0	0	0	0	0	0	0	0	0	0	0	298	Bacteria{superkingdom}(98);Proteobacteria{phylum}(98);Deltaproteobacteria{class}(98);Myxococcales{order}(98);Nannocystaceae{family}(98);{genus}(98);uncultured_bacterium{species}(98)	Bacteria	Proteobacteria	Deltaproteobacteria	Myxococcales	Nannocystaceae		uncultured_bacterium
ASV843	38	0	102	75	290	41	0	0	0	9	0	0	41	0	10	0	0	606	Bacteria{superkingdom}(99);Chloroflexi{phylum}(99);Anaerolineae{class}(99);Anaerolineales{order}(99);Anaerolineaceae{family}(99);{genus}(99);Unassigned{species}(0)	Bacteria	Chloroflexi	Anaerolineae	Anaerolineales	Anaerolineaceae		Unassigned
ASV844	8	66	25	15	21	25	0	0	0	45	0	0	0	54	0	0	0	259	Bacteria{superkingdom}(88);Actinobacteria{phylum}(88);Actinobacteria{class}(88);Actinomycetales{order}(88);Pseudonocardiaceae{family}(88);Actinophytocola{genus}(88);uncultured_bacterium{species}(88)	Bacteria	Actinobacteria	Actinobacteria	Actinomycetales	Pseudonocardiaceae	Actinophytocola	uncultured_bacterium
ASV845	0	5	0	0	0	0	0	0	0	0	0	10	0	0	0	0	0	15	Bacteria{superkingdom}(100);Armatimonadetes{phylum}(100);Armatimonadia{class}(100);Armatimonadales{order}(100);Armatimonadaceae{family}(100);Armatimonas/Armatimonadetes_gp1{genus}(100);Unassigned{species}(0)	Bacteria	Armatimonadetes	Armatimonadia	Armatimonadales	Armatimonadaceae	Armatimonas/Armatimonadetes_gp1	Unassigned
ASV846	0	0	0	0	0	0	0	0	0	0	0	0	0	11	73	40	0	124	Bacteria{superkingdom}(100);Bacteroidetes{phylum}(100);Sphingobacteriia{class}(100);Sphingobacteriales{order}(100);Chitinophagaceae{family}(100);Unassigned{genus}(0);Unassigned{species}(0)	Bacteria	Bacteroidetes	Sphingobacteriia	Sphingobacteriales	Chitinophagaceae	Unassigned	Unassigned
ASV847	0	0	0	0	16	30	0	0	0	0	0	0	0	0	0	0	0	46	Bacteria{superkingdom}(84);Proteobacteria{phylum}(84);Alphaproteobacteria{class}(84);Rhizobiales{order}(84);{family}(84);{genus}(84);uncultured_Methylocystaceae_bacterium{species}(84)	Bacteria	Proteobacteria	Alphaproteobacteria	Rhizobiales			uncultured_Methylocystaceae_bacterium
ASV848	27	0	0	0	0	41	0	0	0	0	0	0	0	0	0	20	0	88	Bacteria{superkingdom}(98);Bacteroidetes{phylum}(98);Cytophagia{class}(98);Cytophagales{order}(98);{family}(98);Chryseolinea{genus}(98);Unassigned{species}(0)	Bacteria	Bacteroidetes	Cytophagia	Cytophagales		Chryseolinea	Unassigned
ASV849	0	0	0	0	195	0	100	0	0	0	0	0	0	0	0	0	0	295	Bacteria{superkingdom}(100);Proteobacteria{phylum}(100);Gammaproteobacteria{class}(100);Xanthomonadales{order}(100);Xanthomonadaceae{family}(100);Unassigned{genus}(0);Unassigned{species}(0)	Bacteria	Proteobacteria	Gammaproteobacteria	Xanthomonadales	Xanthomonadaceae	Unassigned	Unassigned
ASV850	95	0	24	59	293	66	17	0	0	6	0	0	19	0	0	0	0	579	Bacteria{superkingdom}(99);Proteobacteria{phylum}(99);Gammaproteobacteria{class}(99);Xanthomonadales{order}(99);Xanthomonadaceae{family}(99);{genus}(99);Aquimonas_sp._enrichment_culture_clone_03SUJ1{species}(99)	Bacteria	Proteobacteria	Gammaproteobacteria	Xanthomonadales	Xanthomonadaceae		Aquimonas_sp._enrichment_culture_clone_03SUJ1
ASV851	0	0	0	0	165	0	0	5	0	0	0	35	0	0	0	0	0	205	Bacteria{superkingdom}(100);Proteobacteria{phylum}(100);Gammaproteobacteria{class}(100);Xanthomonadales{order}(100);Xanthomonadaceae{family}(100);Pseudoxanthomonas{genus}(100);Unassigned{species}(0)	Bacteria	Proteobacteria	Gammaproteobacteria	Xanthomonadales	Xanthomonadaceae	Pseudoxanthomonas	Unassigned
ASV852	223	22	531	0	139	77	67	24	13	70	0	0	22	0	0	0	0	1188	Bacteria{superkingdom}(99);Firmicutes{phylum}(99);Bacilli{class}(99);Bacillales{order}(99);Bacillaceae_1{family}(99);Bacillus{genus}(99);Unassigned{species}(0)	Bacteria	Firmicutes	Bacilli	Bacillales	Bacillaceae_1	Bacillus	Unassigned
ASV853	33	0	105	0	0	34	0	0	0	0	0	0	0	0	0	0	0	172	Bacteria{superkingdom}(94);Acidobacteria{phylum}(94);Acidobacteria_Gp10{class}(94);{order}(94);{family}(94);Gp10{genus}(94);uncultured_Firmicutes_bacterium{species}(94)	Bacteria	Acidobacteria	Acidobacteria_Gp10			Gp10	uncultured_Firmicutes_bacterium
ASV854	23	0	0	41	0	0	0	0	22	58	0	24	0	68	22	114	0	372	Bacteria{superkingdom}(95);Acidobacteria{phylum}(95);{class}(95);{order}(95);{family}(95);{genus}(95);uncultured_Geobacter_sp.{species}(95)	Bacteria	Acidobacteria					uncultured_Geobacter_sp.
ASV855	83	0	212	37	0	61	79	0	0	0	0	34	0	0	0	0	0	506	Bacteria{superkingdom}(99);Actinobacteria{phylum}(99);Unassigned{class}(0);Unassigned{order}(0);Unassigned{family}(0);Unassigned{genus}(0);Unassigned{species}(0)	Bacteria	Actinobacteria	Unassigned	Unassigned	Unassigned	Unassigned	Unassigned
ASV856	65	0	27	0	0	42	56	6	61	0	0	20	40	0	0	0	0	317	Bacteria{superkingdom}(96);Planctomycetes{phylum}(96);Planctomycetia{class}(96);Planctomycetales{order}(96);Planctomycetaceae{family}(96);Blastopirellula{genus}(96);uncultured_bacterium{species}(96)	Bacteria	Planctomycetes	Planctomycetia	Planctomycetales	Planctomycetaceae	Blastopirellula	uncultured_bacterium
ASV857	0	91	0	0	0	0	0	11	0	32	0	17	0	0	0	10	0	161	Bacteria{superkingdom}(99);Chloroflexi{phylum}(99);Unassigned{class}(0);Unassigned{order}(0);Unassigned{family}(0);Unassigned{genus}(0);Unassigned{species}(0)	Bacteria	Chloroflexi	Unassigned	Unassigned	Unassigned	Unassigned	Unassigned
ASV858	13	0	37	14	36	0	166	0	0	21	156	0	104	97	136	0	25	805	Bacteria{superkingdom}(95);Actinobacteria{phylum}(95);Actinobacteria{class}(95);Solirubrobacterales{order}(95);{family}(95);{genus}(95);Unassigned{species}(0)	Bacteria	Actinobacteria	Actinobacteria	Solirubrobacterales			Unassigned
ASV859	0	0	0	120	0	69	0	0	0	0	48	24	0	91	0	145	90	587	Bacteria{superkingdom}(99);Chloroflexi{phylum}(99);{class}(99);{order}(99);{family}(99);{genus}(99);uncultured_Anaerolineae_bacterium{species}(99)	Bacteria	Chloroflexi					uncultured_Anaerolineae_bacterium
ASV860	173	22	95	137	104	131	14	13	36	19	13	0	95	0	0	0	60	912	Bacteria{superkingdom}(87);Proteobacteria{phylum}(87);Deltaproteobacteria{class}(87);Myxococcales{order}(87);Labilitrichaceae{family}(87);Labilithrix{genus}(87);uncultured_delta_proteobacterium{species}(87)	Bacteria	Proteobacteria	Deltaproteobacteria	Myxococcales	Labilitrichaceae	Labilithrix	uncultured_delta_proteobacterium
ASV861	0	0	50	0	44	16	0	0	43	0	0	0	0	0	0	0	0	153	Bacteria{superkingdom}(100);Acidobacteria{phylum}(100);Acidobacteria_Gp10{class}(100);{order}(100);{family}(100);Gp10{genus}(100);Unassigned{species}(0)	Bacteria	Acidobacteria	Acidobacteria_Gp10			Gp10	Unassigned
ASV862	0	71	0	0	0	0	84	29	36	0	36	58	60	0	84	70	57	585	Bacteria{superkingdom}(100);Proteobacteria{phylum}(100);Betaproteobacteria{class}(100);{order}(100);{family}(100);{genus}(100);Unassigned{species}(0)	Bacteria	Proteobacteria	Betaproteobacteria				Unassigned
ASV863	19	131	48	0	0	72	0	0	0	0	0	91	0	120	252	0	0	733	Bacteria{superkingdom}(88);Actinobacteria{phylum}(88);Actinobacteria{class}(88);Actinomycetales{order}(88);Nocardioidaceae{family}(88);Marmoricola{genus}(88);Unassigned{species}(0)	Bacteria	Actinobacteria	Actinobacteria	Actinomycetales	Nocardioidaceae	Marmoricola	Unassigned
ASV864	65	14	91	34	108	86	0	0	0	0	0	17	0	68	17	75	34	609	Bacteria{superkingdom}(96);Actinobacteria{phylum}(96);Actinobacteria{class}(96);Actinomycetales{order}(96);Sporichthyaceae{family}(96);Sporichthya{genus}(96);Sporichthya_polymorpha{species}(96)	Bacteria	Actinobacteria	Actinobacteria	Actinomycetales	Sporichthyaceae	Sporichthya	Sporichthya_polymorpha
ASV866	0	0	0	0	0	22	0	0	0	0	0	0	255	275	31	132	19	734	Bacteria{superkingdom}(100);Actinobacteria{phylum}(100);Actinobacteria{class}(100);Actinomycetales{order}(100);Pseudonocardiaceae{family}(100);Saccharothrix{genus}(100);Unassigned{species}(0)	Bacteria	Actinobacteria	Actinobacteria	Actinomycetales	Pseudonocardiaceae	Saccharothrix	Unassigned
ASV867	31	0	74	0	0	129	0	0	0	0	0	0	0	0	0	0	0	234	Bacteria{superkingdom}(100);Acidobacteria{phylum}(100);Acidobacteria_Gp10{class}(100);{order}(100);{family}(100);Gp10{genus}(100);Unassigned{species}(0)	Bacteria	Acidobacteria	Acidobacteria_Gp10			Gp10	Unassigned
ASV868	0	247	0	0	0	0	125	70	112	0	47	0	0	0	88	0	281	970	Bacteria{superkingdom}(96);Proteobacteria{phylum}(96);Alphaproteobacteria{class}(96);Rhizobiales{order}(96);Rhodobiaceae{family}(96);{genus}(96);Unassigned{species}(0)	Bacteria	Proteobacteria	Alphaproteobacteria	Rhizobiales	Rhodobiaceae		Unassigned
ASV869	0	0	29	123	115	36	0	0	0	0	0	0	0	0	0	0	11	314	Bacteria{superkingdom}(100);Unassigned{phylum}(0);Unassigned{class}(0);Unassigned{order}(0);Unassigned{family}(0);Unassigned{genus}(0);Unassigned{species}(0)	Bacteria	Unassigned	Unassigned	Unassigned	Unassigned	Unassigned	Unassigned
ASV870	53	46	0	57	24	152	6	0	0	0	0	0	0	0	0	185	38	561	Bacteria{superkingdom}(83);Proteobacteria{phylum}(83);Betaproteobacteria{class}(83);{order}(83);{family}(83);{genus}(83);uncultured_microorganism{species}(83)	Bacteria	Proteobacteria	Betaproteobacteria				uncultured_microorganism
ASV871	75	0	93	27	29	115	0	0	0	0	0	0	10	0	0	0	0	349	Bacteria{superkingdom}(100);candidate_division_WPS-1{phylum}(100);{class}(100);{order}(100);{family}(100);WPS-1_genera_incertae_sedis{genus}(100);Unassigned{species}(0)	Bacteria	candidate_division_WPS-1				WPS-1_genera_incertae_sedis	Unassigned
ASV872	37	0	50	42	0	73	0	0	0	47	35	0	202	0	15	25	0	526	Bacteria{superkingdom}(98);Chloroflexi{phylum}(98);Chloroflexia{class}(98);Kallotenuales{order}(98);Kallotenuaceae{family}(98);Kallotenue{genus}(98);uncultured_bacterium{species}(98)	Bacteria	Chloroflexi	Chloroflexia	Kallotenuales	Kallotenuaceae	Kallotenue	uncultured_bacterium
ASV873	0	0	0	0	0	165	0	0	0	0	0	0	0	0	0	0	0	165	Bacteria{superkingdom}(99);Proteobacteria{phylum}(99);Gammaproteobacteria{class}(99);Xanthomonadales{order}(99);Sinobacteraceae{family}(99);Povalibacter{genus}(99);Unassigned{species}(0)	Bacteria	Proteobacteria	Gammaproteobacteria	Xanthomonadales	Sinobacteraceae	Povalibacter	Unassigned
ASV874	0	0	0	0	0	0	0	0	0	0	0	0	0	0	0	13	52	65	Bacteria{superkingdom}(91);Candidatus_Saccharibacteria{phylum}(91);{class}(91);{order}(91);{family}(91);Saccharibacteria_genera_incertae_sedis{genus}(91);uncultured_bacterium{species}(91)	Bacteria	Candidatus_Saccharibacteria				Saccharibacteria_genera_incertae_sedis	uncultured_bacterium
ASV875	123	199	57	0	39	0	0	160	0	122	0	86	0	0	0	110	11	907	Bacteria{superkingdom}(82);Actinobacteria{phylum}(82);Actinobacteria{class}(82);Solirubrobacterales{order}(82);Conexibacteraceae{family}(82);Conexibacter{genus}(82);uncultured_bacterium{species}(82)	Bacteria	Actinobacteria	Actinobacteria	Solirubrobacterales	Conexibacteraceae	Conexibacter	uncultured_bacterium
ASV876	67	0	69	35	52	62	18	34	0	29	0	15	0	0	0	0	0	381	Bacteria{superkingdom}(100);Chloroflexi{phylum}(100);Chloroflexia{class}(100);{order}(100);{family}(100);{genus}(100);uncultured_bacterium{species}(100)	Bacteria	Chloroflexi	Chloroflexia				uncultured_bacterium
ASV877	91	0	0	101	250	142	25	0	14	0	0	0	0	0	0	0	0	623	Bacteria{superkingdom}(100);Armatimonadetes{phylum}(100);{class}(100);{order}(100);{family}(100);Armatimonadetes_gp5{genus}(100);Unassigned{species}(0)	Bacteria	Armatimonadetes				Armatimonadetes_gp5	Unassigned
ASV878	142	0	49	191	140	0	0	0	0	0	0	0	0	0	0	0	0	522	Bacteria{superkingdom}(99);Proteobacteria{phylum}(99);Gammaproteobacteria{class}(99);Xanthomonadales{order}(99);Sinobacteraceae{family}(99);Povalibacter{genus}(99);Unassigned{species}(0)	Bacteria	Proteobacteria	Gammaproteobacteria	Xanthomonadales	Sinobacteraceae	Povalibacter	Unassigned
ASV879	96	0	47	0	0	29	0	0	0	0	0	0	0	0	0	33	0	205	Bacteria{superkingdom}(100);Acidobacteria{phylum}(100);Acidobacteria_Gp6{class}(100);{order}(100);{family}(100);Gp6{genus}(100);Unassigned{species}(0)	Bacteria	Acidobacteria	Acidobacteria_Gp6			Gp6	Unassigned
ASV880	0	0	0	0	0	39	199	19	0	0	146	0	0	0	688	0	254	1345	Bacteria{superkingdom}(99);Actinobacteria{phylum}(99);Actinobacteria{class}(99);{order}(99);{family}(99);{genus}(99);uncultured_Actinomycetales_bacterium{species}(99)	Bacteria	Actinobacteria	Actinobacteria				uncultured_Actinomycetales_bacterium
ASV881	60	0	64	73	0	100	33	62	55	135	40	56	0	115	0	45	70	908	Bacteria{superkingdom}(89);Actinobacteria{phylum}(89);Actinobacteria{class}(89);Solirubrobacterales{order}(89);Solirubrobacteraceae{family}(89);Solirubrobacter{genus}(89);Unassigned{species}(0)	Bacteria	Actinobacteria	Actinobacteria	Solirubrobacterales	Solirubrobacteraceae	Solirubrobacter	Unassigned
ASV882	35	0	35	35	0	40	0	0	0	0	0	0	0	0	102	0	0	247	Bacteria{superkingdom}(99);Proteobacteria{phylum}(99);Alphaproteobacteria{class}(99);Rhizobiales{order}(99);Phyllobacteriaceae{family}(99);Mesorhizobium{genus}(99);Unassigned{species}(0)	Bacteria	Proteobacteria	Alphaproteobacteria	Rhizobiales	Phyllobacteriaceae	Mesorhizobium	Unassigned
ASV883	0	0	29	44	30	0	47	180	351	139	23	204	34	17	0	0	40	1138	Bacteria{superkingdom}(100);Actinobacteria{phylum}(100);Actinobacteria{class}(100);Solirubrobacterales{order}(100);Unassigned{family}(0);Unassigned{genus}(0);Unassigned{species}(0)	Bacteria	Actinobacteria	Actinobacteria	Solirubrobacterales	Unassigned	Unassigned	Unassigned
ASV885	23	0	0	0	0	13	0	0	13	0	0	25	0	0	61	0	0	135	Bacteria{superkingdom}(100);Proteobacteria{phylum}(100);Alphaproteobacteria{class}(100);Rhizobiales{order}(100);Unassigned{family}(0);Unassigned{genus}(0);Unassigned{species}(0)	Bacteria	Proteobacteria	Alphaproteobacteria	Rhizobiales	Unassigned	Unassigned	Unassigned
ASV886	26	44	26	26	174	72	0	0	0	0	0	0	19	0	0	0	0	387	Bacteria{superkingdom}(100);Actinobacteria{phylum}(100);Actinobacteria{class}(100);Actinomycetales{order}(100);Micromonosporaceae{family}(100);Unassigned{genus}(0);Unassigned{species}(0)	Bacteria	Actinobacteria	Actinobacteria	Actinomycetales	Micromonosporaceae	Unassigned	Unassigned
ASV887	0	55	0	98	156	83	10	0	0	0	0	0	0	0	0	0	39	441	Bacteria{superkingdom}(100);Actinobacteria{phylum}(100);Actinobacteria{class}(100);Actinomycetales{order}(100);Jiangellaceae{family}(100);Unassigned{genus}(0);Unassigned{species}(0)	Bacteria	Actinobacteria	Actinobacteria	Actinomycetales	Jiangellaceae	Unassigned	Unassigned
ASV888	0	34	0	0	27	0	0	0	64	83	41	44	31	19	42	79	149	613	Bacteria{superkingdom}(91);Omnitrophica{phylum}(91);{class}(91);{order}(91);{family}(91);Omnitrophica_genera_incertae_sedis{genus}(91);uncultured_soil_bacterium{species}(91)	Bacteria	Omnitrophica				Omnitrophica_genera_incertae_sedis	uncultured_soil_bacterium
ASV889	31	0	55	1	58	26	0	0	0	0	0	21	7	21	0	13	8	241	Bacteria{superkingdom}(100);Planctomycetes{phylum}(100);Planctomycetia{class}(100);Planctomycetales{order}(100);Planctomycetaceae{family}(100);Pirellula{genus}(100);Unassigned{species}(0)	Bacteria	Planctomycetes	Planctomycetia	Planctomycetales	Planctomycetaceae	Pirellula	Unassigned
ASV890	27	15	26	0	0	0	0	45	25	0	70	0	31	0	8	0	0	247	Bacteria{superkingdom}(100);Acidobacteria{phylum}(100);Acidobacteria_Gp6{class}(100);{order}(100);{family}(100);Gp6{genus}(100);Unassigned{species}(0)	Bacteria	Acidobacteria	Acidobacteria_Gp6			Gp6	Unassigned
ASV891	0	0	0	0	0	0	5	0	10	0	0	0	0	0	0	0	0	15	Bacteria{superkingdom}(99);{phylum}(99);{class}(99);{order}(99);{family}(99);{genus}(99);Unassigned{species}(0)	Bacteria						Unassigned
ASV892	0	0	63	23	52	0	14	0	138	50	11	59	224	279	64	0	454	1431	Bacteria{superkingdom}(100);Gemmatimonadetes{phylum}(100);Gemmatimonadetes{class}(100);Gemmatimonadales{order}(100);Gemmatimonadaceae{family}(100);Gemmatimonas{genus}(100);Unassigned{species}(0)	Bacteria	Gemmatimonadetes	Gemmatimonadetes	Gemmatimonadales	Gemmatimonadaceae	Gemmatimonas	Unassigned
ASV893	25	0	0	23	0	0	0	0	23	16	11	21	0	50	33	29	0	231	Bacteria{superkingdom}(98);Acidobacteria{phylum}(98);Acidobacteria_Gp4{class}(98);{order}(98);{family}(98);Aridibacter{genus}(98);uncultured_organism{species}(98)	Bacteria	Acidobacteria	Acidobacteria_Gp4			Aridibacter	uncultured_organism
ASV894	0	0	0	0	0	0	0	17	0	0	0	34	0	0	0	0	0	51	Bacteria{superkingdom}(100);Actinobacteria{phylum}(100);Actinobacteria{class}(100);Actinomycetales{order}(100);Nocardiaceae{family}(100);Nocardia{genus}(100);Unassigned{species}(0)	Bacteria	Actinobacteria	Actinobacteria	Actinomycetales	Nocardiaceae	Nocardia	Unassigned
ASV895	0	0	0	26	11	432	0	0	0	0	0	0	13	0	0	0	0	482	Bacteria{superkingdom}(99);Acidobacteria{phylum}(99);Acidobacteria_Gp4{class}(99);{order}(99);{family}(99);Aridibacter{genus}(99);Unassigned{species}(0)	Bacteria	Acidobacteria	Acidobacteria_Gp4			Aridibacter	Unassigned
ASV896	0	0	0	48	0	0	0	0	0	0	0	0	0	0	0	0	0	48	Bacteria{superkingdom}(100);Bacteroidetes{phylum}(100);Cytophagia{class}(100);Cytophagales{order}(100);Cytophagaceae{family}(100);Hymenobacter{genus}(100);Unassigned{species}(0)	Bacteria	Bacteroidetes	Cytophagia	Cytophagales	Cytophagaceae	Hymenobacter	Unassigned
ASV897	91	0	66	0	70	51	37	8	116	0	0	0	0	0	0	0	0	439	Bacteria{superkingdom}(92);Gemmatimonadetes{phylum}(92);Gemmatimonadetes{class}(92);Gemmatimonadales{order}(92);Gemmatimonadaceae{family}(92);Gemmatimonas{genus}(92);Unassigned{species}(0)	Bacteria	Gemmatimonadetes	Gemmatimonadetes	Gemmatimonadales	Gemmatimonadaceae	Gemmatimonas	Unassigned
ASV898	40	48	0	0	24	71	0	0	142	0	0	61	17	0	0	33	0	436	Bacteria{superkingdom}(100);{phylum}(100);{class}(100);{order}(100);{family}(100);{genus}(100);uncultured_candidate_division_SPAM_bacterium{species}(100)	Bacteria						uncultured_candidate_division_SPAM_bacterium
ASV899	0	0	0	0	0	0	0	0	10	23	0	0	0	0	0	0	0	33	Bacteria{superkingdom}(99);Actinobacteria{phylum}(99);Actinobacteria{class}(99);Solirubrobacterales{order}(99);Conexibacteraceae{family}(99);Conexibacter{genus}(99);Unassigned{species}(0)	Bacteria	Actinobacteria	Actinobacteria	Solirubrobacterales	Conexibacteraceae	Conexibacter	Unassigned
ASV900	69	95	137	0	32	85	35	0	0	0	0	0	0	0	0	0	0	453	Bacteria{superkingdom}(92);{phylum}(92);{class}(92);{order}(92);{family}(92);{genus}(92);uncultured_Micromonospora_sp.{species}(92)	Bacteria						uncultured_Micromonospora_sp.
ASV901	9	31	0	0	0	52	48	12	54	41	19	46	16	38	86	66	13	531	Bacteria{superkingdom}(100);Verrucomicrobia{phylum}(100);Subdivision3{class}(100);{order}(100);{family}(100);Subdivision3_genera_incertae_sedis{genus}(100);Unassigned{species}(0)	Bacteria	Verrucomicrobia	Subdivision3			Subdivision3_genera_incertae_sedis	Unassigned
ASV903	0	0	0	49	0	0	44	0	0	0	0	0	65	95	88	176	127	644	Bacteria{superkingdom}(96);Proteobacteria{phylum}(96);Alphaproteobacteria{class}(96);Rhizobiales{order}(96);Xanthobacteraceae{family}(96);Pseudolabrys{genus}(96);Unassigned{species}(0)	Bacteria	Proteobacteria	Alphaproteobacteria	Rhizobiales	Xanthobacteraceae	Pseudolabrys	Unassigned
ASV904	60	18	50	0	0	81	23	0	0	0	0	0	0	0	0	0	0	232	Bacteria{superkingdom}(100);Acidobacteria{phylum}(100);Acidobacteria_Gp6{class}(100);{order}(100);{family}(100);Gp6{genus}(100);Unassigned{species}(0)	Bacteria	Acidobacteria	Acidobacteria_Gp6			Gp6	Unassigned
ASV905	0	0	0	0	107	39	0	0	0	0	0	0	0	0	0	0	0	146	Bacteria{superkingdom}(100);Proteobacteria{phylum}(100);Alphaproteobacteria{class}(100);Rhizobiales{order}(100);Phyllobacteriaceae{family}(100);Unassigned{genus}(0);Unassigned{species}(0)	Bacteria	Proteobacteria	Alphaproteobacteria	Rhizobiales	Phyllobacteriaceae	Unassigned	Unassigned
ASV906	0	0	0	0	288	262	0	0	0	0	0	0	0	0	0	0	0	550	Bacteria{superkingdom}(100);Bacteroidetes{phylum}(100);Flavobacteriia{class}(100);Flavobacteriales{order}(100);Flavobacteriaceae{family}(100);Chryseobacterium{genus}(100);Unassigned{species}(0)	Bacteria	Bacteroidetes	Flavobacteriia	Flavobacteriales	Flavobacteriaceae	Chryseobacterium	Unassigned
ASV907	60	0	52	0	71	0	0	16	75	26	0	87	0	0	0	0	90	477	Bacteria{superkingdom}(100);Chloroflexi{phylum}(100);Chloroflexia{class}(100);Kallotenuales{order}(100);Kallotenuaceae{family}(100);Kallotenue{genus}(100);uncultured_bacterium{species}(100)	Bacteria	Chloroflexi	Chloroflexia	Kallotenuales	Kallotenuaceae	Kallotenue	uncultured_bacterium
ASV908	25	142	99	0	0	24	21	0	0	0	0	0	0	0	0	0	5	316	Bacteria{superkingdom}(99);Proteobacteria{phylum}(99);Deltaproteobacteria{class}(99);{order}(99);{family}(99);{genus}(99);Unassigned{species}(0)	Bacteria	Proteobacteria	Deltaproteobacteria				Unassigned
ASV909	31	126	22	0	0	0	0	68	28	140	0	0	0	0	0	0	30	445	Bacteria{superkingdom}(100);Chloroflexi{phylum}(100);{class}(100);{order}(100);{family}(100);{genus}(100);uncultured_Firmicutes_bacterium{species}(100)	Bacteria	Chloroflexi					uncultured_Firmicutes_bacterium
ASV910	0	0	172	67	20	0	0	0	0	0	32	0	195	0	0	0	42	528	Bacteria{superkingdom}(100);Bacteroidetes{phylum}(100);Cytophagia{class}(100);Cytophagales{order}(100);Cytophagaceae{family}(100);Adhaeribacter{genus}(100);Unassigned{species}(0)	Bacteria	Bacteroidetes	Cytophagia	Cytophagales	Cytophagaceae	Adhaeribacter	Unassigned
ASV911	22	0	0	167	0	0	0	0	0	205	0	13	0	0	0	0	134	541	Bacteria{superkingdom}(100);Acidobacteria{phylum}(100);Acidobacteria_Gp10{class}(100);{order}(100);{family}(100);Gp10{genus}(100);Unassigned{species}(0)	Bacteria	Acidobacteria	Acidobacteria_Gp10			Gp10	Unassigned
ASV912	0	0	0	0	0	0	0	0	0	0	0	0	0	0	0	13	30	43	Bacteria{superkingdom}(100);{phylum}(100);{class}(100);{order}(100);{family}(100);{genus}(100);Unassigned{species}(0)	Bacteria						Unassigned
ASV913	0	0	0	29	0	0	0	0	0	0	0	0	34	69	2	0	0	134	Bacteria{superkingdom}(87);Candidatus_Saccharibacteria{phylum}(87);{class}(87);{order}(87);{family}(87);Saccharibacteria_genera_incertae_sedis{genus}(87);uncultured_bacterium{species}(87)	Bacteria	Candidatus_Saccharibacteria				Saccharibacteria_genera_incertae_sedis	uncultured_bacterium
ASV914	36	0	0	38	48	41	0	0	0	0	0	0	0	0	0	0	0	163	Bacteria{superkingdom}(86);Proteobacteria{phylum}(86);Gammaproteobacteria{class}(86);Xanthomonadales{order}(86);Sinobacteraceae{family}(86);Povalibacter{genus}(86);uncultured_bacterium{species}(86)	Bacteria	Proteobacteria	Gammaproteobacteria	Xanthomonadales	Sinobacteraceae	Povalibacter	uncultured_bacterium
ASV915	0	0	0	0	44	0	0	0	0	0	0	0	0	0	0	0	0	44	Bacteria{superkingdom}(95);Acidobacteria{phylum}(95);Acidobacteria_Gp10{class}(95);{order}(95);{family}(95);Gp10{genus}(95);uncultured_Pelobacter_sp.{species}(95)	Bacteria	Acidobacteria	Acidobacteria_Gp10			Gp10	uncultured_Pelobacter_sp.
ASV916	27	85	40	0	21	29	35	7	0	15	0	8	0	0	0	0	0	267	Bacteria{superkingdom}(100);candidate_division_WPS-1{phylum}(100);{class}(100);{order}(100);{family}(100);WPS-1_genera_incertae_sedis{genus}(100);Unassigned{species}(0)	Bacteria	candidate_division_WPS-1				WPS-1_genera_incertae_sedis	Unassigned
ASV917	0	0	0	26	45	23	0	0	0	0	6	17	0	0	0	11	0	128	Bacteria{superkingdom}(98);Planctomycetes{phylum}(98);Planctomycetia{class}(98);Planctomycetales{order}(98);Planctomycetaceae{family}(98);Blastopirellula{genus}(98);uncultured_Planctomycetaceae_bacterium{species}(98)	Bacteria	Planctomycetes	Planctomycetia	Planctomycetales	Planctomycetaceae	Blastopirellula	uncultured_Planctomycetaceae_bacterium
ASV918	19	0	60	92	20	43	17	18	20	0	33	47	287	230	31	120	102	1139	Bacteria{superkingdom}(89);Actinobacteria{phylum}(89);Actinobacteria{class}(89);Solirubrobacterales{order}(89);{family}(89);{genus}(89);Unassigned{species}(0)	Bacteria	Actinobacteria	Actinobacteria	Solirubrobacterales			Unassigned
ASV919	0	0	29	54	43	4	0	0	0	0	0	0	0	0	0	0	0	130	Bacteria{superkingdom}(100);Armatimonadetes{phylum}(100);{class}(100);{order}(100);{family}(100);Armatimonadetes_gp5{genus}(100);Unassigned{species}(0)	Bacteria	Armatimonadetes				Armatimonadetes_gp5	Unassigned
ASV920	34	136	0	60	38	26	0	29	15	44	35	10	0	0	0	44	21	492	Bacteria{superkingdom}(100);Chloroflexi{phylum}(100);{class}(100);{order}(100);{family}(100);{genus}(100);uncultured_Anaerolineae_bacterium{species}(100)	Bacteria	Chloroflexi					uncultured_Anaerolineae_bacterium
ASV921	79	15	0	38	0	32	0	0	0	89	0	0	0	0	0	590	0	843	Bacteria{superkingdom}(100);Unassigned{phylum}(0);Unassigned{class}(0);Unassigned{order}(0);Unassigned{family}(0);Unassigned{genus}(0);Unassigned{species}(0)	Bacteria	Unassigned	Unassigned	Unassigned	Unassigned	Unassigned	Unassigned
ASV922	31	0	29	8	91	0	54	0	0	16	0	0	50	19	0	0	157	455	Bacteria{superkingdom}(92);Ignavibacteriae{phylum}(92);Ignavibacteria{class}(92);Ignavibacteriales{order}(92);Ignavibacteriaceae{family}(92);{genus}(92);uncultured_soil_bacterium{species}(92)	Bacteria	Ignavibacteriae	Ignavibacteria	Ignavibacteriales	Ignavibacteriaceae		uncultured_soil_bacterium
ASV924	55	44	52	23	0	47	21	0	47	43	0	0	0	0	0	0	0	332	Bacteria{superkingdom}(100);Gemmatimonadetes{phylum}(100);Gemmatimonadetes{class}(100);Gemmatimonadales{order}(100);Gemmatimonadaceae{family}(100);Gemmatimonas{genus}(100);Unassigned{species}(0)	Bacteria	Gemmatimonadetes	Gemmatimonadetes	Gemmatimonadales	Gemmatimonadaceae	Gemmatimonas	Unassigned
ASV926	34	0	37	42	63	0	0	12	0	0	27	20	7	19	9	25	0	295	Bacteria{superkingdom}(100);Proteobacteria{phylum}(100);Alphaproteobacteria{class}(100);Caulobacterales{order}(100);Caulobacteraceae{family}(100);Brevundimonas{genus}(100);Unassigned{species}(0)	Bacteria	Proteobacteria	Alphaproteobacteria	Caulobacterales	Caulobacteraceae	Brevundimonas	Unassigned
ASV927	53	33	10	0	8	53	0	0	0	0	0	0	0	0	0	15	0	172	Bacteria{superkingdom}(100);Chloroflexi{phylum}(100);Thermomicrobia{class}(100);Sphaerobacterales{order}(100);Sphaerobacteraceae{family}(100);Unassigned{genus}(0);Unassigned{species}(0)	Bacteria	Chloroflexi	Thermomicrobia	Sphaerobacterales	Sphaerobacteraceae	Unassigned	Unassigned
ASV928	0	265	0	0	0	0	0	0	0	0	0	0	0	0	0	0	0	265	Bacteria{superkingdom}(83);Bacteroidetes{phylum}(83);Sphingobacteriia{class}(83);Sphingobacteriales{order}(83);Chitinophagaceae{family}(83);{genus}(83);Unassigned{species}(0)	Bacteria	Bacteroidetes	Sphingobacteriia	Sphingobacteriales	Chitinophagaceae		Unassigned
ASV929	28	18	24	0	0	0	55	122	67	82	0	212	0	13	0	0	173	794	Bacteria{superkingdom}(100);Planctomycetes{phylum}(100);Planctomycetia{class}(100);Planctomycetales{order}(100);Planctomycetaceae{family}(100);Unassigned{genus}(0);Unassigned{species}(0)	Bacteria	Planctomycetes	Planctomycetia	Planctomycetales	Planctomycetaceae	Unassigned	Unassigned
ASV930	0	0	34	47	71	199	0	12	0	0	24	0	0	0	0	15	0	402	Bacteria{superkingdom}(100);Proteobacteria{phylum}(100);Deltaproteobacteria{class}(100);Myxococcales{order}(100);Unassigned{family}(0);Unassigned{genus}(0);Unassigned{species}(0)	Bacteria	Proteobacteria	Deltaproteobacteria	Myxococcales	Unassigned	Unassigned	Unassigned
ASV931	0	0	24	71	0	0	0	0	0	0	0	0	0	0	0	0	0	95	Bacteria{superkingdom}(99);Proteobacteria{phylum}(99);Gammaproteobacteria{class}(99);Xanthomonadales{order}(99);Sinobacteraceae{family}(99);Steroidobacter{genus}(99);Unassigned{species}(0)	Bacteria	Proteobacteria	Gammaproteobacteria	Xanthomonadales	Sinobacteraceae	Steroidobacter	Unassigned
ASV932	0	0	0	5	0	0	0	0	0	0	0	0	0	0	0	0	0	5	Bacteria{superkingdom}(100);Acidobacteria{phylum}(100);Acidobacteria_Gp7{class}(100);{order}(100);{family}(100);Gp7{genus}(100);Unassigned{species}(0)	Bacteria	Acidobacteria	Acidobacteria_Gp7			Gp7	Unassigned
ASV933	0	0	25	12	0	39	47	0	55	0	38	0	276	9	0	0	39	540	Bacteria{superkingdom}(100);Chloroflexi{phylum}(100);{class}(100);{order}(100);{family}(100);{genus}(100);Unassigned{species}(0)	Bacteria	Chloroflexi					Unassigned
ASV935	53	0	0	0	0	0	94	156	114	0	59	85	25	23	34	60	0	703	Bacteria{superkingdom}(100);Proteobacteria{phylum}(100);Alphaproteobacteria{class}(100);Rhizobiales{order}(100);Rhodobiaceae{family}(100);Unassigned{genus}(0);Unassigned{species}(0)	Bacteria	Proteobacteria	Alphaproteobacteria	Rhizobiales	Rhodobiaceae	Unassigned	Unassigned
ASV936	75	0	56	82	91	84	0	0	0	0	0	0	226	0	0	0	0	614	Bacteria{superkingdom}(98);Proteobacteria{phylum}(98);Betaproteobacteria{class}(98);Burkholderiales{order}(98);Burkholderiales_incertae_sedis{family}(98);Unassigned{genus}(0);Unassigned{species}(0)	Bacteria	Proteobacteria	Betaproteobacteria	Burkholderiales	Burkholderiales_incertae_sedis	Unassigned	Unassigned
ASV937	0	17	0	0	29	49	0	0	11	39	0	16	58	0	57	81	67	424	Bacteria{superkingdom}(91);Armatimonadetes{phylum}(91);{class}(91);{order}(91);{family}(91);Armatimonadetes_gp4{genus}(91);uncultured_actinobacterium{species}(91)	Bacteria	Armatimonadetes				Armatimonadetes_gp4	uncultured_actinobacterium
ASV938	0	0	0	0	85	0	0	0	0	0	0	0	0	49	0	34	0	168	Bacteria{superkingdom}(100);Verrucomicrobia{phylum}(100);Opitutae{class}(100);Opitutales{order}(100);Opitutaceae{family}(100);Opitutus{genus}(100);Unassigned{species}(0)	Bacteria	Verrucomicrobia	Opitutae	Opitutales	Opitutaceae	Opitutus	Unassigned
ASV939	0	0	0	0	257	10	0	0	0	0	0	0	0	0	0	0	0	267	Bacteria{superkingdom}(100);Proteobacteria{phylum}(100);Deltaproteobacteria{class}(100);Bdellovibrionales{order}(100);Bdellovibrionaceae{family}(100);Vampirovibrio{genus}(100);Unassigned{species}(0)	Bacteria	Proteobacteria	Deltaproteobacteria	Bdellovibrionales	Bdellovibrionaceae	Vampirovibrio	Unassigned
ASV940	53	0	68	120	55	31	0	0	0	0	0	0	0	0	0	0	0	327	Bacteria{superkingdom}(97);Proteobacteria{phylum}(97);Alphaproteobacteria{class}(97);Rhizobiales{order}(97);Phyllobacteriaceae{family}(97);Mesorhizobium{genus}(97);Unassigned{species}(0)	Bacteria	Proteobacteria	Alphaproteobacteria	Rhizobiales	Phyllobacteriaceae	Mesorhizobium	Unassigned
ASV941	83	0	11	79	50	0	3	0	0	24	0	0	0	0	0	0	47	297	Bacteria{superkingdom}(83);Proteobacteria{phylum}(83);Deltaproteobacteria{class}(83);Myxococcales{order}(83);{family}(83);{genus}(83);Unassigned{species}(0)	Bacteria	Proteobacteria	Deltaproteobacteria	Myxococcales			Unassigned
ASV942	0	19	101	0	0	67	45	0	0	0	39	0	16	0	129	0	0	416	Bacteria{superkingdom}(100);Acidobacteria{phylum}(100);Acidobacteria_Gp16{class}(100);{order}(100);{family}(100);Gp16{genus}(100);Unassigned{species}(0)	Bacteria	Acidobacteria	Acidobacteria_Gp16			Gp16	Unassigned
ASV943	0	0	0	63	38	0	0	32	0	0	0	0	0	0	0	0	22	155	Bacteria{superkingdom}(99);Actinobacteria{phylum}(99);Actinobacteria{class}(99);Actinomycetales{order}(99);Nocardioidaceae{family}(99);Nocardioides{genus}(99);Unassigned{species}(0)	Bacteria	Actinobacteria	Actinobacteria	Actinomycetales	Nocardioidaceae	Nocardioides	Unassigned
ASV944	0	0	0	0	0	23	76	49	124	70	0	0	32	21	33	49	108	585	Bacteria{superkingdom}(98);Acidobacteria{phylum}(98);Acidobacteria_Gp6{class}(98);{order}(98);{family}(98);Gp6{genus}(98);Unassigned{species}(0)	Bacteria	Acidobacteria	Acidobacteria_Gp6			Gp6	Unassigned
ASV945	0	41	28	15	23	0	40	47	87	121	17	82	100	58	73	105	337	1174	Bacteria{superkingdom}(100);Proteobacteria{phylum}(100);Alphaproteobacteria{class}(100);Rhodobacterales{order}(100);Rhodobacteraceae{family}(100);Rubellimicrobium{genus}(100);Unassigned{species}(0)	Bacteria	Proteobacteria	Alphaproteobacteria	Rhodobacterales	Rhodobacteraceae	Rubellimicrobium	Unassigned
ASV946	32	0	33	12	22	0	0	0	39	56	0	21	123	22	0	19	69	448	Bacteria{superkingdom}(81);Proteobacteria{phylum}(81);Deltaproteobacteria{class}(81);Myxococcales{order}(81);Kofleriaceae{family}(81);Kofleria{genus}(81);uncultured_delta_proteobacterium{species}(81)	Bacteria	Proteobacteria	Deltaproteobacteria	Myxococcales	Kofleriaceae	Kofleria	uncultured_delta_proteobacterium
ASV947	0	0	0	27	0	0	37	0	27	0	0	0	0	0	0	0	0	91	Bacteria{superkingdom}(98);Bacteroidetes{phylum}(98);Sphingobacteriia{class}(98);Sphingobacteriales{order}(98);Chitinophagaceae{family}(98);Niastella{genus}(98);Unassigned{species}(0)	Bacteria	Bacteroidetes	Sphingobacteriia	Sphingobacteriales	Chitinophagaceae	Niastella	Unassigned
ASV948	30	17	15	32	39	22	0	29	16	49	0	69	15	0	52	42	125	552	Bacteria{superkingdom}(100);Proteobacteria{phylum}(100);Alphaproteobacteria{class}(100);Rhizobiales{order}(100);Unassigned{family}(0);Unassigned{genus}(0);Unassigned{species}(0)	Bacteria	Proteobacteria	Alphaproteobacteria	Rhizobiales	Unassigned	Unassigned	Unassigned
ASV949	74	0	52	26	0	45	0	76	43	86	0	58	31	0	0	0	40	531	Bacteria{superkingdom}(100);Planctomycetes{phylum}(100);Planctomycetia{class}(100);Planctomycetales{order}(100);Planctomycetaceae{family}(100);Pirellula{genus}(100);Unassigned{species}(0)	Bacteria	Planctomycetes	Planctomycetia	Planctomycetales	Planctomycetaceae	Pirellula	Unassigned
ASV950	0	9	0	0	67	0	0	0	0	0	0	0	19	14	11	0	0	120	Bacteria{superkingdom}(100);Proteobacteria{phylum}(100);Alphaproteobacteria{class}(100);Rhizobiales{order}(100);{family}(100);{genus}(100);Unassigned{species}(0)	Bacteria	Proteobacteria	Alphaproteobacteria	Rhizobiales			Unassigned
ASV951	27	87	47	16	0	21	0	33	52	91	64	37	34	34	54	0	31	628	Bacteria{superkingdom}(98);Acidobacteria{phylum}(98);Acidobacteria_Gp3{class}(98);{order}(98);{family}(98);Gp3{genus}(98);uncultured_Candidatus_Solibacter_sp.{species}(98)	Bacteria	Acidobacteria	Acidobacteria_Gp3			Gp3	uncultured_Candidatus_Solibacter_sp.
ASV952	39	0	64	111	47	153	0	0	0	0	0	0	0	0	0	0	0	414	Bacteria{superkingdom}(100);Actinobacteria{phylum}(100);Actinobacteria{class}(100);Actinomycetales{order}(100);Nocardioidaceae{family}(100);Nocardioides{genus}(100);Unassigned{species}(0)	Bacteria	Actinobacteria	Actinobacteria	Actinomycetales	Nocardioidaceae	Nocardioides	Unassigned
ASV953	24	0	27	32	15	27	0	0	0	16	0	13	20	42	20	42	24	302	Bacteria{superkingdom}(99);Proteobacteria{phylum}(99);Betaproteobacteria{class}(99);{order}(99);{family}(99);{genus}(99);uncultured_Burkholderiaceae_bacterium{species}(99)	Bacteria	Proteobacteria	Betaproteobacteria				uncultured_Burkholderiaceae_bacterium
ASV954	136	0	0	219	40	118	0	0	0	17	0	0	0	0	0	0	0	530	Bacteria{superkingdom}(92);Proteobacteria{phylum}(92);Gammaproteobacteria{class}(92);Xanthomonadales{order}(92);Xanthomonadaceae{family}(92);Luteimonas{genus}(92);Unassigned{species}(0)	Bacteria	Proteobacteria	Gammaproteobacteria	Xanthomonadales	Xanthomonadaceae	Luteimonas	Unassigned
ASV955	53	0	0	113	74	0	0	0	0	0	0	0	0	0	0	0	0	240	Bacteria{superkingdom}(100);Proteobacteria{phylum}(100);Alphaproteobacteria{class}(100);Rhizobiales{order}(100);Phyllobacteriaceae{family}(100);Mesorhizobium{genus}(100);Unassigned{species}(0)	Bacteria	Proteobacteria	Alphaproteobacteria	Rhizobiales	Phyllobacteriaceae	Mesorhizobium	Unassigned
ASV956	71	0	62	39	17	76	34	0	19	7	0	0	0	0	0	0	0	325	Bacteria{superkingdom}(82);Proteobacteria{phylum}(82);Gammaproteobacteria{class}(82);Xanthomonadales{order}(82);Sinobacteraceae{family}(82);Unassigned{genus}(0);Unassigned{species}(0)	Bacteria	Proteobacteria	Gammaproteobacteria	Xanthomonadales	Sinobacteraceae	Unassigned	Unassigned
ASV957	0	0	37	95	57	27	0	0	0	21	0	0	0	0	0	0	0	237	Bacteria{superkingdom}(98);Proteobacteria{phylum}(98);Gammaproteobacteria{class}(98);{order}(98);{family}(98);{genus}(98);uncultured_Steroidobacter_sp.{species}(98)	Bacteria	Proteobacteria	Gammaproteobacteria				uncultured_Steroidobacter_sp.
ASV958	23	0	18	12	23	29	0	0	0	0	0	0	6	0	0	0	0	111	Bacteria{superkingdom}(99);Proteobacteria{phylum}(99);Alphaproteobacteria{class}(99);{order}(99);{family}(99);{genus}(99);Unassigned{species}(0)	Bacteria	Proteobacteria	Alphaproteobacteria				Unassigned
ASV959	844	188	0	0	0	0	0	0	0	0	0	0	0	0	0	0	0	1032	Bacteria{superkingdom}(99);Actinobacteria{phylum}(99);Actinobacteria{class}(99);Actinomycetales{order}(99);Streptomycetaceae{family}(99);Streptomyces{genus}(99);Unassigned{species}(0)	Bacteria	Actinobacteria	Actinobacteria	Actinomycetales	Streptomycetaceae	Streptomyces	Unassigned
ASV960	44	0	37	283	57	21	0	0	0	0	0	0	0	0	0	0	0	442	Bacteria{superkingdom}(95);Proteobacteria{phylum}(95);Gammaproteobacteria{class}(95);Xanthomonadales{order}(95);Xanthomonadaceae{family}(95);Lysobacter{genus}(95);Unassigned{species}(0)	Bacteria	Proteobacteria	Gammaproteobacteria	Xanthomonadales	Xanthomonadaceae	Lysobacter	Unassigned
ASV961	0	19	0	0	10	0	0	0	0	19	0	38	0	95	37	225	247	690	Bacteria{superkingdom}(100);Actinobacteria{phylum}(100);Actinobacteria{class}(100);Actinomycetales{order}(100);Thermomonosporaceae{family}(100);Actinomadura{genus}(100);Unassigned{species}(0)	Bacteria	Actinobacteria	Actinobacteria	Actinomycetales	Thermomonosporaceae	Actinomadura	Unassigned
ASV962	119	0	100	44	0	24	117	167	179	73	0	144	0	0	0	0	0	967	Bacteria{superkingdom}(100);Actinobacteria{phylum}(100);Actinobacteria{class}(100);Solirubrobacterales{order}(100);Unassigned{family}(0);Unassigned{genus}(0);Unassigned{species}(0)	Bacteria	Actinobacteria	Actinobacteria	Solirubrobacterales	Unassigned	Unassigned	Unassigned
ASV963	13	0	0	58	86	7	0	0	0	6	0	0	26	5	11	8	19	239	Bacteria{superkingdom}(99);Bacteroidetes{phylum}(99);Cytophagia{class}(99);Cytophagales{order}(99);Cytophagaceae{family}(99);Larkinella{genus}(99);uncultured_bacterium{species}(99)	Bacteria	Bacteroidetes	Cytophagia	Cytophagales	Cytophagaceae	Larkinella	uncultured_bacterium
ASV964	7	0	334	0	0	0	0	0	0	93	0	0	0	0	0	0	0	434	Bacteria{superkingdom}(100);Acidobacteria{phylum}(100);Acidobacteria_Gp7{class}(100);{order}(100);{family}(100);Gp7{genus}(100);Unassigned{species}(0)	Bacteria	Acidobacteria	Acidobacteria_Gp7			Gp7	Unassigned
ASV965	18	17	44	17	19	19	31	39	39	40	29	8	18	18	12	13	23	404	Bacteria{superkingdom}(100);Unassigned{phylum}(0);Unassigned{class}(0);Unassigned{order}(0);Unassigned{family}(0);Unassigned{genus}(0);Unassigned{species}(0)	Bacteria	Unassigned	Unassigned	Unassigned	Unassigned	Unassigned	Unassigned
ASV966	0	0	0	54	0	190	0	0	0	0	0	0	0	0	0	0	0	244	Bacteria{superkingdom}(100);Proteobacteria{phylum}(100);Betaproteobacteria{class}(100);Burkholderiales{order}(100);Oxalobacteraceae{family}(100);Massilia{genus}(100);Unassigned{species}(0)	Bacteria	Proteobacteria	Betaproteobacteria	Burkholderiales	Oxalobacteraceae	Massilia	Unassigned
ASV967	63	58	65	0	15	0	24	0	20	0	0	19	0	0	0	0	21	285	Bacteria{superkingdom}(100);Unassigned{phylum}(0);Unassigned{class}(0);Unassigned{order}(0);Unassigned{family}(0);Unassigned{genus}(0);Unassigned{species}(0)	Bacteria	Unassigned	Unassigned	Unassigned	Unassigned	Unassigned	Unassigned
ASV968	34	33	61	0	33	100	37	0	0	0	9	6	128	25	0	0	88	554	Bacteria{superkingdom}(99);Actinobacteria{phylum}(99);Actinobacteria{class}(99);Solirubrobacterales{order}(99);Unassigned{family}(0);Unassigned{genus}(0);Unassigned{species}(0)	Bacteria	Actinobacteria	Actinobacteria	Solirubrobacterales	Unassigned	Unassigned	Unassigned
ASV969	28	0	24	26	53	38	0	12	18	0	0	22	0	0	21	0	0	242	Bacteria{superkingdom}(91);Proteobacteria{phylum}(91);Alphaproteobacteria{class}(91);Sphingomonadales{order}(91);Erythrobacteraceae{family}(91);Altererythrobacter{genus}(91);Unassigned{species}(0)	Bacteria	Proteobacteria	Alphaproteobacteria	Sphingomonadales	Erythrobacteraceae	Altererythrobacter	Unassigned
ASV970	319	0	0	0	0	0	0	0	0	0	0	0	0	0	0	0	0	319	Bacteria{superkingdom}(100);Actinobacteria{phylum}(100);Actinobacteria{class}(100);Actinomycetales{order}(100);Pseudonocardiaceae{family}(100);Unassigned{genus}(0);Unassigned{species}(0)	Bacteria	Actinobacteria	Actinobacteria	Actinomycetales	Pseudonocardiaceae	Unassigned	Unassigned
ASV972	70	0	26	33	0	52	0	0	0	0	0	0	0	5	16	30	0	232	Bacteria{superkingdom}(99);Planctomycetes{phylum}(99);Planctomycetia{class}(99);Planctomycetales{order}(99);Planctomycetaceae{family}(99);{genus}(99);Planctomycetaceae_bacterium_LX124{species}(99)	Bacteria	Planctomycetes	Planctomycetia	Planctomycetales	Planctomycetaceae		Planctomycetaceae_bacterium_LX124
ASV973	0	40	40	0	0	27	0	0	14	0	0	0	0	0	16	0	0	137	Bacteria{superkingdom}(100);Proteobacteria{phylum}(100);Alphaproteobacteria{class}(100);Rhizobiales{order}(100);Phyllobacteriaceae{family}(100);Mesorhizobium{genus}(100);Unassigned{species}(0)	Bacteria	Proteobacteria	Alphaproteobacteria	Rhizobiales	Phyllobacteriaceae	Mesorhizobium	Unassigned
ASV974	53	0	5	101	38	92	0	0	0	0	0	0	0	0	0	0	0	289	Bacteria{superkingdom}(83);Proteobacteria{phylum}(83);Gammaproteobacteria{class}(83);Xanthomonadales{order}(83);Sinobacteraceae{family}(83);Unassigned{genus}(0);Unassigned{species}(0)	Bacteria	Proteobacteria	Gammaproteobacteria	Xanthomonadales	Sinobacteraceae	Unassigned	Unassigned
ASV975	46	105	15	0	0	76	26	0	0	46	0	0	0	0	0	20	0	334	Bacteria{superkingdom}(98);Actinobacteria{phylum}(98);Actinobacteria{class}(98);Solirubrobacterales{order}(98);{family}(98);{genus}(98);Unassigned{species}(0)	Bacteria	Actinobacteria	Actinobacteria	Solirubrobacterales			Unassigned
ASV976	29	24	0	0	19	39	0	0	0	13	0	0	0	30	0	27	38	219	Bacteria{superkingdom}(100);{phylum}(100);{class}(100);{order}(100);{family}(100);{genus}(100);uncultured_Anaerolineae_bacterium{species}(100)	Bacteria						uncultured_Anaerolineae_bacterium
ASV977	0	0	109	9	77	0	157	28	244	0	55	165	0	0	0	0	0	844	Bacteria{superkingdom}(100);Planctomycetes{phylum}(100);Planctomycetia{class}(100);Planctomycetales{order}(100);Planctomycetaceae{family}(100);Pirellula{genus}(100);Unassigned{species}(0)	Bacteria	Planctomycetes	Planctomycetia	Planctomycetales	Planctomycetaceae	Pirellula	Unassigned
ASV978	32	9	14	31	54	20	0	0	0	9	0	15	0	14	0	0	0	198	Bacteria{superkingdom}(99);Proteobacteria{phylum}(99);Alphaproteobacteria{class}(99);Rhizobiales{order}(99);Phyllobacteriaceae{family}(99);Mesorhizobium{genus}(99);Unassigned{species}(0)	Bacteria	Proteobacteria	Alphaproteobacteria	Rhizobiales	Phyllobacteriaceae	Mesorhizobium	Unassigned
ASV979	0	0	0	0	786	110	0	0	0	0	0	0	0	0	0	0	7	903	Bacteria{superkingdom}(93);Bacteroidetes{phylum}(93);Cytophagia{class}(93);Cytophagales{order}(93);{family}(93);Ohtaekwangia{genus}(93);uncultured_bacterium{species}(93)	Bacteria	Bacteroidetes	Cytophagia	Cytophagales		Ohtaekwangia	uncultured_bacterium
ASV981	21	14	47	17	22	27	23	120	99	70	21	53	70	10	60	18	73	765	Bacteria{superkingdom}(100);Unassigned{phylum}(0);Unassigned{class}(0);Unassigned{order}(0);Unassigned{family}(0);Unassigned{genus}(0);Unassigned{species}(0)	Bacteria	Unassigned	Unassigned	Unassigned	Unassigned	Unassigned	Unassigned
ASV982	0	0	0	0	0	46	0	0	0	0	0	0	0	0	0	0	0	46	Bacteria{superkingdom}(100);Acidobacteria{phylum}(100);Acidobacteria_Gp7{class}(100);{order}(100);{family}(100);Gp7{genus}(100);Unassigned{species}(0)	Bacteria	Acidobacteria	Acidobacteria_Gp7			Gp7	Unassigned
ASV983	28	0	60	11	68	53	53	0	28	11	32	0	13	11	0	0	19	387	Bacteria{superkingdom}(98);Chloroflexi{phylum}(98);Chloroflexia{class}(98);Kallotenuales{order}(98);Kallotenuaceae{family}(98);Kallotenue{genus}(98);uncultured_bacterium{species}(98)	Bacteria	Chloroflexi	Chloroflexia	Kallotenuales	Kallotenuaceae	Kallotenue	uncultured_bacterium
ASV984	0	0	0	9	1	0	0	0	0	37	14	24	0	53	28	96	0	262	Bacteria{superkingdom}(100);Proteobacteria{phylum}(100);Alphaproteobacteria{class}(100);Rhizobiales{order}(100);Methylobacteriaceae{family}(100);Microvirga{genus}(100);Unassigned{species}(0)	Bacteria	Proteobacteria	Alphaproteobacteria	Rhizobiales	Methylobacteriaceae	Microvirga	Unassigned
ASV985	151	0	83	108	38	0	0	0	0	0	0	0	0	0	0	0	0	380	Bacteria{superkingdom}(100);Proteobacteria{phylum}(100);Gammaproteobacteria{class}(100);Oceanospirillales{order}(100);{family}(100);{genus}(100);gamma_proteobacterium_Y-134{species}(100)	Bacteria	Proteobacteria	Gammaproteobacteria	Oceanospirillales			gamma_proteobacterium_Y-134
ASV986	10	8	0	0	242	0	0	0	0	0	0	0	0	24	0	0	0	284	Bacteria{superkingdom}(100);Chloroflexi{phylum}(100);{class}(100);{order}(100);{family}(100);{genus}(100);unidentified_marine_bacterioplankton{species}(100)	Bacteria	Chloroflexi					unidentified_marine_bacterioplankton
ASV987	0	0	0	0	24	0	47	0	0	0	0	0	61	0	0	0	0	132	Bacteria{superkingdom}(97);Acidobacteria{phylum}(97);Acidobacteria_Gp4{class}(97);{order}(97);{family}(97);Gp4{genus}(97);uncultured_Acidobacteriales_bacterium{species}(97)	Bacteria	Acidobacteria	Acidobacteria_Gp4			Gp4	uncultured_Acidobacteriales_bacterium
ASV988	0	15	52	38	0	77	131	167	109	0	0	28	155	95	0	0	90	957	Bacteria{superkingdom}(100);Acidobacteria{phylum}(100);Acidobacteria_Gp6{class}(100);{order}(100);{family}(100);Gp6{genus}(100);Unassigned{species}(0)	Bacteria	Acidobacteria	Acidobacteria_Gp6			Gp6	Unassigned
ASV989	0	64	32	42	0	14	31	51	0	0	0	62	95	36	124	0	111	662	Bacteria{superkingdom}(91);Proteobacteria{phylum}(91);Betaproteobacteria{class}(91);Burkholderiales{order}(91);Comamonadaceae{family}(91);Ramlibacter{genus}(91);Unassigned{species}(0)	Bacteria	Proteobacteria	Betaproteobacteria	Burkholderiales	Comamonadaceae	Ramlibacter	Unassigned
ASV990	29	0	53	22	112	50	29	0	0	24	0	0	0	22	13	25	22	401	Bacteria{superkingdom}(100);Proteobacteria{phylum}(100);Alphaproteobacteria{class}(100);Caulobacterales{order}(100);Caulobacteraceae{family}(100);Brevundimonas{genus}(100);Unassigned{species}(0)	Bacteria	Proteobacteria	Alphaproteobacteria	Caulobacterales	Caulobacteraceae	Brevundimonas	Unassigned
ASV991	59	0	26	0	50	0	0	0	14	20	0	26	59	8	0	61	0	323	Bacteria{superkingdom}(86);Proteobacteria{phylum}(86);Alphaproteobacteria{class}(86);Rhodospirillales{order}(86);{family}(86);{genus}(86);uncultured_Rhodospirillales_bacterium{species}(86)	Bacteria	Proteobacteria	Alphaproteobacteria	Rhodospirillales			uncultured_Rhodospirillales_bacterium
ASV992	47	24	29	31	25	24	81	39	44	102	44	0	0	0	0	0	45	535	Bacteria{superkingdom}(100);Armatimonadetes{phylum}(100);Chthonomonadetes{class}(100);Chthonomonadales{order}(100);Chthonomonadaceae{family}(100);Chthonomonas/Armatimonadetes_gp3{genus}(100);Unassigned{species}(0)	Bacteria	Armatimonadetes	Chthonomonadetes	Chthonomonadales	Chthonomonadaceae	Chthonomonas/Armatimonadetes_gp3	Unassigned
ASV993	0	0	0	0	0	0	0	0	0	0	0	0	0	150	0	0	0	150	Bacteria{superkingdom}(100);Chloroflexi{phylum}(100);Chloroflexia{class}(100);Kallotenuales{order}(100);Kallotenuaceae{family}(100);Kallotenue{genus}(100);Unassigned{species}(0)	Bacteria	Chloroflexi	Chloroflexia	Kallotenuales	Kallotenuaceae	Kallotenue	Unassigned
ASV994	0	0	0	0	0	85	0	0	0	0	0	0	0	0	0	0	0	85	Bacteria{superkingdom}(100);Actinobacteria{phylum}(100);Actinobacteria{class}(100);Actinomycetales{order}(100);Streptosporangiaceae{family}(100);Nonomuraea{genus}(100);Unassigned{species}(0)	Bacteria	Actinobacteria	Actinobacteria	Actinomycetales	Streptosporangiaceae	Nonomuraea	Unassigned
ASV995	0	0	0	14	0	98	0	0	0	0	0	0	0	0	0	0	0	112	Bacteria{superkingdom}(98);Actinobacteria{phylum}(98);Actinobacteria{class}(98);Solirubrobacterales{order}(98);Conexibacteraceae{family}(98);Conexibacter{genus}(98);uncultured_Rubrobacteraceae_bacterium{species}(98)	Bacteria	Actinobacteria	Actinobacteria	Solirubrobacterales	Conexibacteraceae	Conexibacter	uncultured_Rubrobacteraceae_bacterium
ASV996	27	22	131	30	25	37	0	35	39	11	0	0	0	0	0	0	28	385	Bacteria{superkingdom}(90);{phylum}(90);{class}(90);{order}(90);{family}(90);{genus}(90);uncultured_Actinomyces_sp.{species}(90)	Bacteria						uncultured_Actinomyces_sp.
ASV999	103	0	67	69	35	45	13	0	0	0	0	0	0	0	0	0	19	351	Bacteria{superkingdom}(100);Acidobacteria{phylum}(100);Acidobacteria_Gp6{class}(100);{order}(100);{family}(100);Gp6{genus}(100);Unassigned{species}(0)	Bacteria	Acidobacteria	Acidobacteria_Gp6			Gp6	Unassigned
ASV1002	45	0	34	0	45	36	0	0	30	0	0	0	0	0	0	0	0	190	Bacteria{superkingdom}(98);Planctomycetes{phylum}(98);Planctomycetia{class}(98);Planctomycetales{order}(98);Planctomycetaceae{family}(98);Blastopirellula{genus}(98);uncultured_bacterium{species}(98)	Bacteria	Planctomycetes	Planctomycetia	Planctomycetales	Planctomycetaceae	Blastopirellula	uncultured_bacterium
ASV1003	2	0	58	207	0	46	0	0	0	0	0	0	0	0	0	0	0	313	Bacteria{superkingdom}(100);Bacteroidetes{phylum}(100);Cytophagia{class}(100);Cytophagales{order}(100);{family}(100);Ohtaekwangia{genus}(100);Unassigned{species}(0)	Bacteria	Bacteroidetes	Cytophagia	Cytophagales		Ohtaekwangia	Unassigned
ASV1004	31	0	31	0	0	46	22	0	32	0	15	18	5	8	27	0	26	261	Bacteria{superkingdom}(100);Chloroflexi{phylum}(100);Chloroflexia{class}(100);{order}(100);{family}(100);{genus}(100);uncultured_bacterium{species}(100)	Bacteria	Chloroflexi	Chloroflexia				uncultured_bacterium
ASV1005	0	0	0	0	119	0	44	0	0	0	0	0	0	0	0	0	0	163	Bacteria{superkingdom}(87);Planctomycetes{phylum}(87);Planctomycetia{class}(87);Planctomycetales{order}(87);Planctomycetaceae{family}(87);Blastopirellula{genus}(87);uncultured_bacterium{species}(87)	Bacteria	Planctomycetes	Planctomycetia	Planctomycetales	Planctomycetaceae	Blastopirellula	uncultured_bacterium
ASV1006	27	0	0	332	171	361	0	0	0	0	11	0	0	0	0	0	0	902	Bacteria{superkingdom}(100);Acidobacteria{phylum}(100);Acidobacteria_Gp7{class}(100);{order}(100);{family}(100);Gp7{genus}(100);Unassigned{species}(0)	Bacteria	Acidobacteria	Acidobacteria_Gp7			Gp7	Unassigned
ASV1008	44	31	28	14	0	0	114	154	118	77	26	43	48	14	0	13	60	784	Bacteria{superkingdom}(94);Chloroflexi{phylum}(94);{class}(94);{order}(94);{family}(94);{genus}(94);bacterium_Ellin6543{species}(94)	Bacteria	Chloroflexi					bacterium_Ellin6543
ASV1009	28	41	29	54	45	10	0	0	0	16	0	14	0	14	0	13	0	264	Bacteria{superkingdom}(100);Proteobacteria{phylum}(100);Deltaproteobacteria{class}(100);Myxococcales{order}(100);Unassigned{family}(0);Unassigned{genus}(0);Unassigned{species}(0)	Bacteria	Proteobacteria	Deltaproteobacteria	Myxococcales	Unassigned	Unassigned	Unassigned
ASV1010	21	9	7	14	0	45	41	46	36	32	19	17	72	0	0	0	25	384	Bacteria{superkingdom}(100);Acidobacteria{phylum}(100);Acidobacteria_Gp5{class}(100);{order}(100);{family}(100);Gp5{genus}(100);Unassigned{species}(0)	Bacteria	Acidobacteria	Acidobacteria_Gp5			Gp5	Unassigned
ASV1011	0	37	0	25	22	10	26	0	0	21	0	0	0	101	0	0	14	256	Bacteria{superkingdom}(99);Proteobacteria{phylum}(99);Deltaproteobacteria{class}(99);Myxococcales{order}(99);Polyangiaceae{family}(99);{genus}(99);Unassigned{species}(0)	Bacteria	Proteobacteria	Deltaproteobacteria	Myxococcales	Polyangiaceae		Unassigned
ASV1012	0	0	0	45	0	0	45	142	82	87	0	358	0	160	0	0	115	1034	Bacteria{superkingdom}(100);{phylum}(100);{class}(100);{order}(100);{family}(100);{genus}(100);uncultured_Actinomyces_sp.{species}(100)	Bacteria						uncultured_Actinomyces_sp.
ASV1013	44	0	78	25	15	16	52	32	21	67	18	20	0	0	55	0	12	455	Bacteria{superkingdom}(100);Actinobacteria{phylum}(100);Actinobacteria{class}(100);Gaiellales{order}(100);Gaiellaceae{family}(100);Gaiella{genus}(100);Unassigned{species}(0)	Bacteria	Actinobacteria	Actinobacteria	Gaiellales	Gaiellaceae	Gaiella	Unassigned
ASV1014	0	0	12	23	0	0	0	18	0	0	18	35	184	337	212	135	116	1090	Bacteria{superkingdom}(94);Actinobacteria{phylum}(94);{class}(94);{order}(94);{family}(94);{genus}(94);uncultured_soil_bacterium{species}(94)	Bacteria	Actinobacteria					uncultured_soil_bacterium
ASV1015	0	152	5	20	0	6	0	0	0	63	21	0	34	21	145	0	179	646	Bacteria{superkingdom}(87);Bacteroidetes{phylum}(87);Cytophagia{class}(87);Cytophagales{order}(87);{family}(87);Ohtaekwangia{genus}(87);uncultured_Bacteroidetes_bacterium{species}(87)	Bacteria	Bacteroidetes	Cytophagia	Cytophagales		Ohtaekwangia	uncultured_Bacteroidetes_bacterium
ASV1016	11	40	9	11	0	0	39	25	0	24	12	135	38	123	161	282	517	1427	Bacteria{superkingdom}(90);Proteobacteria{phylum}(90);Alphaproteobacteria{class}(90);Sphingomonadales{order}(90);Sphingomonadaceae{family}(90);Novosphingobium{genus}(90);Unassigned{species}(0)	Bacteria	Proteobacteria	Alphaproteobacteria	Sphingomonadales	Sphingomonadaceae	Novosphingobium	Unassigned
ASV1017	0	0	0	219	12	0	0	0	0	0	0	0	0	0	0	0	9	240	Bacteria{superkingdom}(88);Bacteroidetes{phylum}(88);Sphingobacteriia{class}(88);Sphingobacteriales{order}(88);Chitinophagaceae{family}(88);{genus}(88);uncultured_Chitinophagaceae_bacterium{species}(88)	Bacteria	Bacteroidetes	Sphingobacteriia	Sphingobacteriales	Chitinophagaceae		uncultured_Chitinophagaceae_bacterium
ASV1018	0	18	0	0	0	7	0	0	0	0	0	0	0	0	0	0	0	25	Bacteria{superkingdom}(81);Actinobacteria{phylum}(81);Actinobacteria{class}(81);Actinomycetales{order}(81);Nocardioidaceae{family}(81);Marmoricola{genus}(81);Unassigned{species}(0)	Bacteria	Actinobacteria	Actinobacteria	Actinomycetales	Nocardioidaceae	Marmoricola	Unassigned
ASV1019	0	0	65	51	0	49	0	65	51	50	0	59	0	21	0	0	164	575	Bacteria{superkingdom}(100);Actinobacteria{phylum}(100);Unassigned{class}(0);Unassigned{order}(0);Unassigned{family}(0);Unassigned{genus}(0);Unassigned{species}(0)	Bacteria	Actinobacteria	Unassigned	Unassigned	Unassigned	Unassigned	Unassigned
ASV1020	28	0	54	7	34	0	31	0	161	40	0	38	14	28	21	65	284	805	Bacteria{superkingdom}(88);Proteobacteria{phylum}(88);Alphaproteobacteria{class}(88);Sphingomonadales{order}(88);Sphingomonadaceae{family}(88);Sphingosinicella{genus}(88);Unassigned{species}(0)	Bacteria	Proteobacteria	Alphaproteobacteria	Sphingomonadales	Sphingomonadaceae	Sphingosinicella	Unassigned
ASV1021	38	19	23	75	29	64	0	0	0	17	0	19	0	0	0	0	0	284	Bacteria{superkingdom}(100);Gemmatimonadetes{phylum}(100);Gemmatimonadetes{class}(100);Gemmatimonadales{order}(100);Gemmatimonadaceae{family}(100);Gemmatimonas{genus}(100);uncultured_Pelobacter_sp.{species}(100)	Bacteria	Gemmatimonadetes	Gemmatimonadetes	Gemmatimonadales	Gemmatimonadaceae	Gemmatimonas	uncultured_Pelobacter_sp.
ASV1022	0	27	0	0	0	0	0	0	0	0	0	16	0	0	27	57	0	127	Bacteria{superkingdom}(100);Actinobacteria{phylum}(100);Actinobacteria{class}(100);Actinomycetales{order}(100);Micromonosporaceae{family}(100);Unassigned{genus}(0);Unassigned{species}(0)	Bacteria	Actinobacteria	Actinobacteria	Actinomycetales	Micromonosporaceae	Unassigned	Unassigned
ASV1023	36	0	20	28	36	79	0	0	0	0	0	0	0	0	0	21	11	231	Bacteria{superkingdom}(98);Planctomycetes{phylum}(98);Planctomycetia{class}(98);Planctomycetales{order}(98);Planctomycetaceae{family}(98);Pirellula{genus}(98);uncultured_soil_bacterium{species}(98)	Bacteria	Planctomycetes	Planctomycetia	Planctomycetales	Planctomycetaceae	Pirellula	uncultured_soil_bacterium
ASV1024	0	13	0	9	0	0	0	0	0	0	0	31	31	98	181	407	87	857	Bacteria{superkingdom}(100);Actinobacteria{phylum}(100);Actinobacteria{class}(100);Actinomycetales{order}(100);Microbacteriaceae{family}(100);Unassigned{genus}(0);Unassigned{species}(0)	Bacteria	Actinobacteria	Actinobacteria	Actinomycetales	Microbacteriaceae	Unassigned	Unassigned
ASV1025	28	0	0	0	88	99	0	0	4	18	0	10	0	0	0	0	0	247	Bacteria{superkingdom}(97);Chloroflexi{phylum}(97);Anaerolineae{class}(97);Anaerolineales{order}(97);Anaerolineaceae{family}(97);{genus}(97);Unassigned{species}(0)	Bacteria	Chloroflexi	Anaerolineae	Anaerolineales	Anaerolineaceae		Unassigned
ASV1026	9	0	13	12	13	24	0	0	0	0	0	0	24	0	0	0	4	99	Bacteria{superkingdom}(99);Proteobacteria{phylum}(99);Deltaproteobacteria{class}(99);Bdellovibrionales{order}(99);Bdellovibrionaceae{family}(99);Vampirovibrio{genus}(99);uncultured_bacterium{species}(99)	Bacteria	Proteobacteria	Deltaproteobacteria	Bdellovibrionales	Bdellovibrionaceae	Vampirovibrio	uncultured_bacterium
ASV1027	26	0	80	0	32	52	37	0	24	0	0	117	0	20	16	21	0	425	Bacteria{superkingdom}(99);Actinobacteria{phylum}(99);Actinobacteria{class}(99);Actinomycetales{order}(99);Nocardioidaceae{family}(99);Marmoricola{genus}(99);Unassigned{species}(0)	Bacteria	Actinobacteria	Actinobacteria	Actinomycetales	Nocardioidaceae	Marmoricola	Unassigned
ASV1028	0	0	0	0	0	0	0	0	0	0	0	35	0	45	65	51	0	196	Bacteria{superkingdom}(98);Proteobacteria{phylum}(98);Betaproteobacteria{class}(98);Burkholderiales{order}(98);Oxalobacteraceae{family}(98);Noviherbaspirillum{genus}(98);Unassigned{species}(0)	Bacteria	Proteobacteria	Betaproteobacteria	Burkholderiales	Oxalobacteraceae	Noviherbaspirillum	Unassigned
ASV1029	0	0	0	0	0	0	0	0	393	0	0	11	61	0	0	0	184	649	Bacteria{superkingdom}(97);Actinobacteria{phylum}(97);Actinobacteria{class}(97);Solirubrobacterales{order}(97);Unassigned{family}(0);Unassigned{genus}(0);Unassigned{species}(0)	Bacteria	Actinobacteria	Actinobacteria	Solirubrobacterales	Unassigned	Unassigned	Unassigned
ASV1030	13	0	28	0	30	35	116	6	9	0	11	0	8	0	0	0	0	256	Bacteria{superkingdom}(99);Chloroflexi{phylum}(99);Unassigned{class}(0);Unassigned{order}(0);Unassigned{family}(0);Unassigned{genus}(0);Unassigned{species}(0)	Bacteria	Chloroflexi	Unassigned	Unassigned	Unassigned	Unassigned	Unassigned
ASV1031	35	0	64	0	24	71	62	0	0	0	0	0	0	0	0	0	0	256	Bacteria{superkingdom}(100);Acidobacteria{phylum}(100);Acidobacteria_Gp6{class}(100);{order}(100);{family}(100);Gp6{genus}(100);Unassigned{species}(0)	Bacteria	Acidobacteria	Acidobacteria_Gp6			Gp6	Unassigned
ASV1032	28	13	13	18	17	35	36	71	42	37	27	26	79	71	125	66	74	778	Bacteria{superkingdom}(99);Chloroflexi{phylum}(99);{class}(99);{order}(99);{family}(99);{genus}(99);uncultured_Firmicutes_bacterium{species}(99)	Bacteria	Chloroflexi					uncultured_Firmicutes_bacterium
ASV1033	0	0	97	51	0	188	0	0	0	0	0	0	0	0	0	0	0	336	Bacteria{superkingdom}(84);Bacteroidetes{phylum}(84);Sphingobacteriia{class}(84);Sphingobacteriales{order}(84);Chitinophagaceae{family}(84);{genus}(84);uncultured_Cytophaga_sp.{species}(84)	Bacteria	Bacteroidetes	Sphingobacteriia	Sphingobacteriales	Chitinophagaceae		uncultured_Cytophaga_sp.
ASV1034	15	82	0	0	0	0	0	0	20	47	24	66	92	137	0	0	0	483	Bacteria{superkingdom}(95);Actinobacteria{phylum}(95);Actinobacteria{class}(95);Acidimicrobiales{order}(95);Acidimicrobineae_incertae_sedis{family}(95);Aciditerrimonas{genus}(95);Unassigned{species}(0)	Bacteria	Actinobacteria	Actinobacteria	Acidimicrobiales	Acidimicrobineae_incertae_sedis	Aciditerrimonas	Unassigned
ASV1035	0	0	0	35	0	0	0	0	0	0	0	0	0	278	0	0	0	313	Bacteria{superkingdom}(90);Actinobacteria{phylum}(90);Actinobacteria{class}(90);Actinomycetales{order}(90);Pseudonocardiaceae{family}(90);Actinophytocola{genus}(90);uncultured_bacterium{species}(90)	Bacteria	Actinobacteria	Actinobacteria	Actinomycetales	Pseudonocardiaceae	Actinophytocola	uncultured_bacterium
ASV1036	0	0	21	99	39	33	0	0	0	0	0	0	0	0	0	0	0	192	Bacteria{superkingdom}(100);Chloroflexi{phylum}(100);Anaerolineae{class}(100);Anaerolineales{order}(100);Anaerolineaceae{family}(100);{genus}(100);uncultured_Caldilineaceae_bacterium{species}(100)	Bacteria	Chloroflexi	Anaerolineae	Anaerolineales	Anaerolineaceae		uncultured_Caldilineaceae_bacterium
ASV1037	0	0	0	0	54	20	0	0	0	0	0	0	13	0	0	0	0	87	Bacteria{superkingdom}(81);Chloroflexi{phylum}(81);Anaerolineae{class}(81);Anaerolineales{order}(81);Anaerolineaceae{family}(81);{genus}(81);Unassigned{species}(0)	Bacteria	Chloroflexi	Anaerolineae	Anaerolineales	Anaerolineaceae		Unassigned
ASV1038	55	0	0	69	61	61	0	0	0	0	0	0	0	0	0	0	22	268	Bacteria{superkingdom}(88);Planctomycetes{phylum}(88);Planctomycetia{class}(88);Planctomycetales{order}(88);Planctomycetaceae{family}(88);Pirellula{genus}(88);uncultured_planctomycete{species}(88)	Bacteria	Planctomycetes	Planctomycetia	Planctomycetales	Planctomycetaceae	Pirellula	uncultured_planctomycete
ASV1039	31	0	38	273	37	186	0	0	33	0	0	0	229	0	0	0	0	827	Bacteria{superkingdom}(100);Proteobacteria{phylum}(100);Deltaproteobacteria{class}(100);Myxococcales{order}(100);Cystobacteraceae{family}(100);Unassigned{genus}(0);Unassigned{species}(0)	Bacteria	Proteobacteria	Deltaproteobacteria	Myxococcales	Cystobacteraceae	Unassigned	Unassigned
ASV1040	0	0	0	6	0	0	0	0	9	7	9	24	0	0	28	0	0	83	Bacteria{superkingdom}(95);{phylum}(95);{class}(95);{order}(95);{family}(95);{genus}(95);uncultured_Malonomonas_sp.{species}(95)	Bacteria						uncultured_Malonomonas_sp.
ASV1041	10	15	21	36	19	35	14	0	9	0	0	0	0	0	0	19	15	193	Bacteria{superkingdom}(100);Proteobacteria{phylum}(100);Alphaproteobacteria{class}(100);Rhizobiales{order}(100);Unassigned{family}(0);Unassigned{genus}(0);Unassigned{species}(0)	Bacteria	Proteobacteria	Alphaproteobacteria	Rhizobiales	Unassigned	Unassigned	Unassigned
ASV1042	17	6	0	0	14	10	11	15	16	0	3	21	28	11	62	222	71	507	Bacteria{superkingdom}(87);Proteobacteria{phylum}(87);Gammaproteobacteria{class}(87);Xanthomonadales{order}(87);Sinobacteraceae{family}(87);Fontimonas{genus}(87);uncultured_bacterium{species}(87)	Bacteria	Proteobacteria	Gammaproteobacteria	Xanthomonadales	Sinobacteraceae	Fontimonas	uncultured_bacterium
ASV1044	0	0	0	0	13	0	0	0	0	0	0	0	0	0	0	0	0	13	Bacteria{superkingdom}(100);Bacteroidetes{phylum}(100);Flavobacteriia{class}(100);Flavobacteriales{order}(100);Flavobacteriaceae{family}(100);Flavobacterium{genus}(100);Unassigned{species}(0)	Bacteria	Bacteroidetes	Flavobacteriia	Flavobacteriales	Flavobacteriaceae	Flavobacterium	Unassigned
ASV1045	0	0	0	0	50	58	0	30	0	0	0	0	0	0	0	0	0	138	Bacteria{superkingdom}(100);Acidobacteria{phylum}(100);Acidobacteria_Gp6{class}(100);{order}(100);{family}(100);Gp6{genus}(100);Unassigned{species}(0)	Bacteria	Acidobacteria	Acidobacteria_Gp6			Gp6	Unassigned
ASV1046	0	0	0	0	0	0	0	0	0	0	0	0	0	0	34	0	0	34	Bacteria{superkingdom}(100);Bacteroidetes{phylum}(100);Sphingobacteriia{class}(100);Sphingobacteriales{order}(100);Chitinophagaceae{family}(100);Chitinophaga{genus}(100);Unassigned{species}(0)	Bacteria	Bacteroidetes	Sphingobacteriia	Sphingobacteriales	Chitinophagaceae	Chitinophaga	Unassigned
ASV1047	18	40	0	34	0	35	0	0	0	25	0	0	0	0	0	0	0	152	Bacteria{superkingdom}(100);Proteobacteria{phylum}(100);Deltaproteobacteria{class}(100);Myxococcales{order}(100);Unassigned{family}(0);Unassigned{genus}(0);Unassigned{species}(0)	Bacteria	Proteobacteria	Deltaproteobacteria	Myxococcales	Unassigned	Unassigned	Unassigned
ASV1050	21	0	27	40	76	0	0	0	53	56	9	59	27	51	76	47	19	561	Bacteria{superkingdom}(99);Chloroflexi{phylum}(99);Unassigned{class}(0);Unassigned{order}(0);Unassigned{family}(0);Unassigned{genus}(0);Unassigned{species}(0)	Bacteria	Chloroflexi	Unassigned	Unassigned	Unassigned	Unassigned	Unassigned
ASV1051	46	0	26	30	26	0	11	27	61	12	0	23	0	0	0	0	0	262	Bacteria{superkingdom}(100);Actinobacteria{phylum}(100);Actinobacteria{class}(100);Unassigned{order}(0);Unassigned{family}(0);Unassigned{genus}(0);Unassigned{species}(0)	Bacteria	Actinobacteria	Actinobacteria	Unassigned	Unassigned	Unassigned	Unassigned
ASV1052	0	0	0	0	0	0	0	0	0	0	0	96	0	0	0	0	0	96	Bacteria{superkingdom}(100);Bacteroidetes{phylum}(100);Flavobacteriia{class}(100);Flavobacteriales{order}(100);Flavobacteriaceae{family}(100);Chryseobacterium{genus}(100);Unassigned{species}(0)	Bacteria	Bacteroidetes	Flavobacteriia	Flavobacteriales	Flavobacteriaceae	Chryseobacterium	Unassigned
ASV1053	0	0	0	0	0	0	0	0	0	0	0	69	0	66	0	22	0	157	Bacteria{superkingdom}(100);Actinobacteria{phylum}(100);Actinobacteria{class}(100);Actinomycetales{order}(100);Streptomycetaceae{family}(100);Streptomyces{genus}(100);Unassigned{species}(0)	Bacteria	Actinobacteria	Actinobacteria	Actinomycetales	Streptomycetaceae	Streptomyces	Unassigned
ASV1054	5	7	21	37	7	20	0	0	0	1	0	0	0	0	0	0	0	98	Bacteria{superkingdom}(90);Actinobacteria{phylum}(90);Actinobacteria{class}(90);Actinomycetales{order}(90);Pseudonocardiaceae{family}(90);Actinophytocola{genus}(90);uncultured_bacterium{species}(90)	Bacteria	Actinobacteria	Actinobacteria	Actinomycetales	Pseudonocardiaceae	Actinophytocola	uncultured_bacterium
ASV1055	0	0	0	0	0	0	0	0	0	0	0	131	0	0	7	36	0	174	Bacteria{superkingdom}(88);Proteobacteria{phylum}(88);Betaproteobacteria{class}(88);Burkholderiales{order}(88);Oxalobacteraceae{family}(88);Massilia{genus}(88);Massilia_dura{species}(88)	Bacteria	Proteobacteria	Betaproteobacteria	Burkholderiales	Oxalobacteraceae	Massilia	Massilia_dura
ASV1056	119	34	91	149	33	31	51	0	0	0	0	0	0	0	0	0	0	508	Bacteria{superkingdom}(100);Acidobacteria{phylum}(100);Acidobacteria_Gp6{class}(100);{order}(100);{family}(100);Gp6{genus}(100);Unassigned{species}(0)	Bacteria	Acidobacteria	Acidobacteria_Gp6			Gp6	Unassigned
ASV1057	28	0	0	0	0	61	0	0	0	0	0	0	33	0	0	30	0	152	Bacteria{superkingdom}(82);Actinobacteria{phylum}(82);Actinobacteria{class}(82);Solirubrobacterales{order}(82);{family}(82);{genus}(82);Unassigned{species}(0)	Bacteria	Actinobacteria	Actinobacteria	Solirubrobacterales			Unassigned
ASV1058	0	0	0	0	0	0	0	58	0	0	0	0	0	0	0	0	0	58	Bacteria{superkingdom}(100);Proteobacteria{phylum}(100);Betaproteobacteria{class}(100);{order}(100);{family}(100);{genus}(100);Unassigned{species}(0)	Bacteria	Proteobacteria	Betaproteobacteria				Unassigned
ASV1059	29	25	0	71	0	0	10	12	5	70	5	67	0	21	63	30	7	415	Bacteria{superkingdom}(99);Chloroflexi{phylum}(99);Thermomicrobia{class}(99);Sphaerobacterales{order}(99);Sphaerobacteraceae{family}(99);Unassigned{genus}(0);Unassigned{species}(0)	Bacteria	Chloroflexi	Thermomicrobia	Sphaerobacterales	Sphaerobacteraceae	Unassigned	Unassigned
ASV1060	14	0	0	0	62	0	0	0	0	12	0	0	0	0	0	0	0	88	Bacteria{superkingdom}(98);Proteobacteria{phylum}(98);Gammaproteobacteria{class}(98);{order}(98);{family}(98);{genus}(98);uncultured_Saccharophagus_sp.{species}(98)	Bacteria	Proteobacteria	Gammaproteobacteria				uncultured_Saccharophagus_sp.
ASV1061	0	0	0	0	0	0	0	0	0	0	0	83	0	13	31	0	0	127	Bacteria{superkingdom}(99);Proteobacteria{phylum}(99);Alphaproteobacteria{class}(99);Rhodobacterales{order}(99);Rhodobacteraceae{family}(99);Paracoccus{genus}(99);Unassigned{species}(0)	Bacteria	Proteobacteria	Alphaproteobacteria	Rhodobacterales	Rhodobacteraceae	Paracoccus	Unassigned
ASV1062	0	21	0	57	692	0	0	0	44	0	0	0	0	0	0	0	0	814	Bacteria{superkingdom}(100);Bacteroidetes{phylum}(100);Sphingobacteriia{class}(100);Sphingobacteriales{order}(100);Sphingobacteriaceae{family}(100);Pedobacter{genus}(100);Unassigned{species}(0)	Bacteria	Bacteroidetes	Sphingobacteriia	Sphingobacteriales	Sphingobacteriaceae	Pedobacter	Unassigned
ASV1064	0	0	0	0	0	0	0	0	567	23	0	29	0	216	245	91	123	1294	Bacteria{superkingdom}(100);Bacteroidetes{phylum}(100);Sphingobacteriia{class}(100);Sphingobacteriales{order}(100);Chitinophagaceae{family}(100);Unassigned{genus}(0);Unassigned{species}(0)	Bacteria	Bacteroidetes	Sphingobacteriia	Sphingobacteriales	Chitinophagaceae	Unassigned	Unassigned
ASV1066	17	0	47	0	25	26	30	16	16	0	0	150	0	0	0	0	0	327	Bacteria{superkingdom}(90);Gemmatimonadetes{phylum}(90);Gemmatimonadetes{class}(90);Gemmatimonadales{order}(90);Gemmatimonadaceae{family}(90);Gemmatimonas{genus}(90);uncultured_Gemmatimonadales_bacterium{species}(90)	Bacteria	Gemmatimonadetes	Gemmatimonadetes	Gemmatimonadales	Gemmatimonadaceae	Gemmatimonas	uncultured_Gemmatimonadales_bacterium
ASV1067	0	0	0	11	73	36	0	0	0	0	0	0	0	0	0	0	0	120	Bacteria{superkingdom}(100);Bacteroidetes{phylum}(100);Sphingobacteriia{class}(100);Sphingobacteriales{order}(100);Chitinophagaceae{family}(100);{genus}(100);Unassigned{species}(0)	Bacteria	Bacteroidetes	Sphingobacteriia	Sphingobacteriales	Chitinophagaceae		Unassigned
ASV1068	31	0	0	0	0	105	0	0	0	0	0	0	0	0	0	0	0	136	Bacteria{superkingdom}(83);Planctomycetes{phylum}(83);Planctomycetia{class}(83);Planctomycetales{order}(83);Planctomycetaceae{family}(83);Blastopirellula{genus}(83);Unassigned{species}(0)	Bacteria	Planctomycetes	Planctomycetia	Planctomycetales	Planctomycetaceae	Blastopirellula	Unassigned
ASV1069	0	0	0	0	0	0	0	0	0	0	0	17	0	8	21	0	0	46	Bacteria{superkingdom}(100);Proteobacteria{phylum}(100);Alphaproteobacteria{class}(100);Rhizobiales{order}(100);Hyphomicrobiaceae{family}(100);Devosia{genus}(100);Unassigned{species}(0)	Bacteria	Proteobacteria	Alphaproteobacteria	Rhizobiales	Hyphomicrobiaceae	Devosia	Unassigned
ASV1070	0	33	24	0	0	0	88	65	60	49	0	56	65	55	136	76	0	707	Bacteria{superkingdom}(100);Acidobacteria{phylum}(100);Acidobacteria_Gp6{class}(100);{order}(100);{family}(100);Gp6{genus}(100);Unassigned{species}(0)	Bacteria	Acidobacteria	Acidobacteria_Gp6			Gp6	Unassigned
ASV1071	12	0	0	33	0	25	0	0	0	0	0	0	0	0	0	0	0	70	Bacteria{superkingdom}(100);Acidobacteria{phylum}(100);Acidobacteria_Gp10{class}(100);{order}(100);{family}(100);Gp10{genus}(100);Unassigned{species}(0)	Bacteria	Acidobacteria	Acidobacteria_Gp10			Gp10	Unassigned
ASV1072	0	0	0	0	0	12	0	0	0	0	0	0	0	0	0	0	0	12	Bacteria{superkingdom}(91);Proteobacteria{phylum}(91);Alphaproteobacteria{class}(91);Rhizobiales{order}(91);{family}(91);{genus}(91);Unassigned{species}(0)	Bacteria	Proteobacteria	Alphaproteobacteria	Rhizobiales			Unassigned
ASV1073	21	10	28	27	57	62	0	0	0	0	0	0	0	0	0	0	0	205	Bacteria{superkingdom}(94);Verrucomicrobia{phylum}(94);Subdivision3{class}(94);{order}(94);{family}(94);Subdivision3_genera_incertae_sedis{genus}(94);uncultured_Moorella_sp.{species}(94)	Bacteria	Verrucomicrobia	Subdivision3			Subdivision3_genera_incertae_sedis	uncultured_Moorella_sp.
ASV1074	21	0	0	0	0	40	0	0	0	31	0	20	0	15	16	0	0	143	Bacteria{superkingdom}(100);Proteobacteria{phylum}(100);Betaproteobacteria{class}(100);Burkholderiales{order}(100);Burkholderiaceae{family}(100);Cupriavidus{genus}(100);Unassigned{species}(0)	Bacteria	Proteobacteria	Betaproteobacteria	Burkholderiales	Burkholderiaceae	Cupriavidus	Unassigned
ASV1075	88	101	103	0	0	58	0	0	0	0	0	0	0	0	0	0	0	350	Bacteria{superkingdom}(100);Gemmatimonadetes{phylum}(100);Gemmatimonadetes{class}(100);Gemmatimonadales{order}(100);Gemmatimonadaceae{family}(100);Gemmatimonas{genus}(100);Unassigned{species}(0)	Bacteria	Gemmatimonadetes	Gemmatimonadetes	Gemmatimonadales	Gemmatimonadaceae	Gemmatimonas	Unassigned
ASV1076	88	51	66	0	66	34	78	117	87	16	0	0	0	0	0	0	12	615	Bacteria{superkingdom}(100);Chloroflexi{phylum}(100);Chloroflexia{class}(100);{order}(100);{family}(100);{genus}(100);uncultured_bacterium{species}(100)	Bacteria	Chloroflexi	Chloroflexia				uncultured_bacterium
ASV1077	22	0	40	40	0	32	0	55	0	39	0	61	20	0	19	0	8	336	Bacteria{superkingdom}(98);Firmicutes{phylum}(98);Bacilli{class}(98);Bacillales{order}(98);Paenibacillaceae_1{family}(98);Paenibacillus{genus}(98);Unassigned{species}(0)	Bacteria	Firmicutes	Bacilli	Bacillales	Paenibacillaceae_1	Paenibacillus	Unassigned
ASV1078	0	0	56	0	21	0	0	0	0	0	0	0	0	0	0	11	0	88	Bacteria{superkingdom}(100);Chloroflexi{phylum}(100);{class}(100);{order}(100);{family}(100);{genus}(100);uncultured_sludge_bacterium_S14{species}(100)	Bacteria	Chloroflexi					uncultured_sludge_bacterium_S14
ASV1080	13	0	25	20	0	15	42	0	0	73	101	0	53	27	164	55	24	612	Bacteria{superkingdom}(100);Bacteroidetes{phylum}(100);Sphingobacteriia{class}(100);Sphingobacteriales{order}(100);Chitinophagaceae{family}(100);Unassigned{genus}(0);Unassigned{species}(0)	Bacteria	Bacteroidetes	Sphingobacteriia	Sphingobacteriales	Chitinophagaceae	Unassigned	Unassigned
ASV1081	18	0	59	47	54	46	12	0	9	22	0	0	0	20	43	0	27	357	Bacteria{superkingdom}(92);Armatimonadetes{phylum}(92);{class}(92);{order}(92);{family}(92);Armatimonadetes_gp4{genus}(92);uncultured_bacterium{species}(92)	Bacteria	Armatimonadetes				Armatimonadetes_gp4	uncultured_bacterium
ASV1082	12	0	0	0	0	19	0	0	5	0	0	0	0	0	0	0	0	36	Bacteria{superkingdom}(98);Chloroflexi{phylum}(98);Caldilineae{class}(98);Caldilineales{order}(98);Caldilineaceae{family}(98);Litorilinea{genus}(98);uncultured_Rubrobacter_sp.{species}(98)	Bacteria	Chloroflexi	Caldilineae	Caldilineales	Caldilineaceae	Litorilinea	uncultured_Rubrobacter_sp.
ASV1083	0	0	55	78	41	0	127	0	0	0	50	102	79	0	0	0	36	568	Bacteria{superkingdom}(90);Firmicutes{phylum}(90);Bacilli{class}(90);Bacillales{order}(90);Bacillaceae_1{family}(90);Bacillus{genus}(90);Bacillus_funiculus{species}(90)	Bacteria	Firmicutes	Bacilli	Bacillales	Bacillaceae_1	Bacillus	Bacillus_funiculus
ASV1084	0	0	0	0	0	0	0	0	0	0	0	0	0	34	37	26	26	123	Bacteria{superkingdom}(100);Actinobacteria{phylum}(100);Actinobacteria{class}(100);Actinomycetales{order}(100);Unassigned{family}(0);Unassigned{genus}(0);Unassigned{species}(0)	Bacteria	Actinobacteria	Actinobacteria	Actinomycetales	Unassigned	Unassigned	Unassigned
ASV1085	25	25	50	18	0	46	12	75	32	27	40	38	219	32	0	19	21	679	Bacteria{superkingdom}(99);Armatimonadetes{phylum}(99);{class}(99);{order}(99);{family}(99);Armatimonadetes_gp4{genus}(99);uncultured_Firmicutes_bacterium{species}(99)	Bacteria	Armatimonadetes				Armatimonadetes_gp4	uncultured_Firmicutes_bacterium
ASV1086	15	0	0	0	0	69	0	0	0	11	0	0	0	0	0	56	0	151	Bacteria{superkingdom}(100);Acidobacteria{phylum}(100);Acidobacteria_Gp4{class}(100);{order}(100);{family}(100);Gp4{genus}(100);Unassigned{species}(0)	Bacteria	Acidobacteria	Acidobacteria_Gp4			Gp4	Unassigned
ASV1087	20	0	0	0	0	0	81	96	64	185	82	60	38	72	0	40	71	809	Bacteria{superkingdom}(98);Chloroflexi{phylum}(98);Chloroflexia{class}(98);{order}(98);{family}(98);{genus}(98);uncultured_bacterium{species}(98)	Bacteria	Chloroflexi	Chloroflexia				uncultured_bacterium
ASV1088	24	185	71	10	61	12	136	0	203	0	32	15	0	0	0	0	10	759	Bacteria{superkingdom}(99);Proteobacteria{phylum}(99);Betaproteobacteria{class}(99);{order}(99);{family}(99);{genus}(99);Unassigned{species}(0)	Bacteria	Proteobacteria	Betaproteobacteria				Unassigned
ASV1089	21	21	0	28	32	34	0	16	0	28	0	0	43	75	43	31	55	427	Bacteria{superkingdom}(100);Planctomycetes{phylum}(100);Planctomycetia{class}(100);Planctomycetales{order}(100);Planctomycetaceae{family}(100);{genus}(100);uncultured_Planctomyces_sp.{species}(100)	Bacteria	Planctomycetes	Planctomycetia	Planctomycetales	Planctomycetaceae		uncultured_Planctomyces_sp.
ASV1090	38	0	34	91	0	0	0	66	0	57	0	69	0	0	107	0	0	462	Bacteria{superkingdom}(92);Actinobacteria{phylum}(92);Actinobacteria{class}(92);Actinomycetales{order}(92);Nocardioidaceae{family}(92);Marmoricola{genus}(92);Unassigned{species}(0)	Bacteria	Actinobacteria	Actinobacteria	Actinomycetales	Nocardioidaceae	Marmoricola	Unassigned
ASV1091	0	0	0	0	0	0	0	0	0	0	0	0	0	0	1901	0	0	1901	Bacteria{superkingdom}(100);Bacteroidetes{phylum}(100);Sphingobacteriia{class}(100);Sphingobacteriales{order}(100);Chitinophagaceae{family}(100);Unassigned{genus}(0);Unassigned{species}(0)	Bacteria	Bacteroidetes	Sphingobacteriia	Sphingobacteriales	Chitinophagaceae	Unassigned	Unassigned
ASV1092	9	17	0	3	0	0	0	0	0	0	0	0	0	0	0	0	0	29	Bacteria{superkingdom}(99);Proteobacteria{phylum}(99);Betaproteobacteria{class}(99);Burkholderiales{order}(99);{family}(99);{genus}(99);Unassigned{species}(0)	Bacteria	Proteobacteria	Betaproteobacteria	Burkholderiales			Unassigned
ASV1093	31	0	39	14	31	10	57	69	49	49	48	11	0	0	0	0	0	408	Bacteria{superkingdom}(99);Gemmatimonadetes{phylum}(99);Gemmatimonadetes{class}(99);Gemmatimonadales{order}(99);Gemmatimonadaceae{family}(99);Gemmatimonas{genus}(99);uncultured_prokaryote{species}(99)	Bacteria	Gemmatimonadetes	Gemmatimonadetes	Gemmatimonadales	Gemmatimonadaceae	Gemmatimonas	uncultured_prokaryote
ASV1094	0	0	0	0	19	0	29	0	19	0	0	0	0	0	0	0	592	659	Bacteria{superkingdom}(100);Chloroflexi{phylum}(100);Chloroflexia{class}(100);{order}(100);{family}(100);{genus}(100);uncultured_Herpetosiphon_sp.{species}(100)	Bacteria	Chloroflexi	Chloroflexia				uncultured_Herpetosiphon_sp.
ASV1095	0	0	64	0	34	0	0	0	0	0	0	0	0	0	0	0	0	98	Bacteria{superkingdom}(97);Proteobacteria{phylum}(97);Alphaproteobacteria{class}(97);Sphingomonadales{order}(97);Sphingomonadaceae{family}(97);Novosphingobium{genus}(97);Unassigned{species}(0)	Bacteria	Proteobacteria	Alphaproteobacteria	Sphingomonadales	Sphingomonadaceae	Novosphingobium	Unassigned
ASV1096	27	251	0	80	0	0	0	48	85	105	0	141	0	0	0	41	0	778	Bacteria{superkingdom}(99);Acidobacteria{phylum}(99);Acidobacteria_Gp16{class}(99);{order}(99);{family}(99);Gp16{genus}(99);uncultured_bacterium{species}(99)	Bacteria	Acidobacteria	Acidobacteria_Gp16			Gp16	uncultured_bacterium
ASV1097	9	21	0	0	8	23	0	0	79	0	0	0	0	0	0	0	28	168	Bacteria{superkingdom}(100);Proteobacteria{phylum}(100);Deltaproteobacteria{class}(100);Myxococcales{order}(100);Kofleriaceae{family}(100);Kofleria{genus}(100);uncultured_soil_bacterium{species}(100)	Bacteria	Proteobacteria	Deltaproteobacteria	Myxococcales	Kofleriaceae	Kofleria	uncultured_soil_bacterium
ASV1098	39	49	13	9	0	0	21	11	12	24	0	41	0	0	0	17	0	236	Bacteria{superkingdom}(100);Actinobacteria{phylum}(100);Actinobacteria{class}(100);Rubrobacterales{order}(100);Rubrobacteraceae{family}(100);Rubrobacter{genus}(100);Unassigned{species}(0)	Bacteria	Actinobacteria	Actinobacteria	Rubrobacterales	Rubrobacteraceae	Rubrobacter	Unassigned
ASV1099	0	0	18	0	0	30	19	0	0	0	0	0	52	0	58	0	55	232	Bacteria{superkingdom}(97);Chloroflexi{phylum}(97);{class}(97);{order}(97);{family}(97);{genus}(97);uncultured_Firmicutes_bacterium{species}(97)	Bacteria	Chloroflexi					uncultured_Firmicutes_bacterium
ASV1101	0	30	0	0	0	0	0	0	0	0	9	42	0	0	0	0	0	81	Bacteria{superkingdom}(98);Armatimonadetes{phylum}(98);Armatimonadia{class}(98);Armatimonadales{order}(98);Armatimonadaceae{family}(98);Armatimonas/Armatimonadetes_gp1{genus}(98);uncultured_bacterium{species}(98)	Bacteria	Armatimonadetes	Armatimonadia	Armatimonadales	Armatimonadaceae	Armatimonas/Armatimonadetes_gp1	uncultured_bacterium
ASV1102	25	97	10	39	71	40	6	0	0	16	0	0	0	0	0	0	0	304	Bacteria{superkingdom}(100);Proteobacteria{phylum}(100);Alphaproteobacteria{class}(100);Caulobacterales{order}(100);Caulobacteraceae{family}(100);Phenylobacterium{genus}(100);Unassigned{species}(0)	Bacteria	Proteobacteria	Alphaproteobacteria	Caulobacterales	Caulobacteraceae	Phenylobacterium	Unassigned
ASV1103	70	0	33	28	44	0	21	9	42	12	56	148	148	0	0	0	9	620	Bacteria{superkingdom}(87);Actinobacteria{phylum}(87);Actinobacteria{class}(87);Actinomycetales{order}(87);Micrococcaceae{family}(87);Arthrobacter{genus}(87);Unassigned{species}(0)	Bacteria	Actinobacteria	Actinobacteria	Actinomycetales	Micrococcaceae	Arthrobacter	Unassigned
ASV1104	22	0	16	88	25	19	0	89	27	81	17	129	0	9	0	27	35	584	Bacteria{superkingdom}(100);Gemmatimonadetes{phylum}(100);Gemmatimonadetes{class}(100);Gemmatimonadales{order}(100);Gemmatimonadaceae{family}(100);Gemmatimonas{genus}(100);Unassigned{species}(0)	Bacteria	Gemmatimonadetes	Gemmatimonadetes	Gemmatimonadales	Gemmatimonadaceae	Gemmatimonas	Unassigned
ASV1105	0	0	0	0	0	0	35	0	0	0	0	0	0	0	0	0	0	35	Bacteria{superkingdom}(100);Chloroflexi{phylum}(100);Unassigned{class}(0);Unassigned{order}(0);Unassigned{family}(0);Unassigned{genus}(0);Unassigned{species}(0)	Bacteria	Chloroflexi	Unassigned	Unassigned	Unassigned	Unassigned	Unassigned
ASV1106	0	142	0	0	0	0	0	53	98	51	0	39	0	0	86	0	0	469	Bacteria{superkingdom}(100);Proteobacteria{phylum}(100);Betaproteobacteria{class}(100);{order}(100);{family}(100);{genus}(100);Unassigned{species}(0)	Bacteria	Proteobacteria	Betaproteobacteria				Unassigned
ASV1107	32	58	17	27	18	18	0	0	19	50	0	15	27	84	16	76	17	474	Bacteria{superkingdom}(99);Proteobacteria{phylum}(99);Alphaproteobacteria{class}(99);Sphingomonadales{order}(99);Sphingomonadaceae{family}(99);Sphingomonas{genus}(99);Unassigned{species}(0)	Bacteria	Proteobacteria	Alphaproteobacteria	Sphingomonadales	Sphingomonadaceae	Sphingomonas	Unassigned
ASV1108	0	0	0	0	0	0	0	0	0	0	0	0	0	79	220	0	0	299	Bacteria{superkingdom}(100);Actinobacteria{phylum}(100);Actinobacteria{class}(100);Actinomycetales{order}(100);Glycomycetaceae{family}(100);Glycomyces{genus}(100);Unassigned{species}(0)	Bacteria	Actinobacteria	Actinobacteria	Actinomycetales	Glycomycetaceae	Glycomyces	Unassigned
ASV1109	0	0	0	5	8	57	0	0	0	0	0	0	0	0	0	0	0	70	Bacteria{superkingdom}(90);Proteobacteria{phylum}(90);Betaproteobacteria{class}(90);Burkholderiales{order}(90);{family}(90);{genus}(90);Unassigned{species}(0)	Bacteria	Proteobacteria	Betaproteobacteria	Burkholderiales			Unassigned
ASV1110	0	0	0	0	0	0	40	0	0	14	28	165	148	85	125	30	96	731	Bacteria{superkingdom}(92);Acidobacteria{phylum}(92);Acidobacteria_Gp6{class}(92);{order}(92);{family}(92);Gp6{genus}(92);agricultural_soil_bacterium_SC-I-9{species}(92)	Bacteria	Acidobacteria	Acidobacteria_Gp6			Gp6	agricultural_soil_bacterium_SC-I-9
ASV1112	21	6	0	0	58	34	0	0	0	0	0	0	0	0	0	0	0	119	Bacteria{superkingdom}(95);Planctomycetes{phylum}(95);Planctomycetia{class}(95);Planctomycetales{order}(95);Planctomycetaceae{family}(95);Blastopirellula{genus}(95);uncultured_bacterium{species}(95)	Bacteria	Planctomycetes	Planctomycetia	Planctomycetales	Planctomycetaceae	Blastopirellula	uncultured_bacterium
ASV1113	0	59	0	0	0	0	34	286	0	0	42	0	0	0	337	0	332	1090	Bacteria{superkingdom}(99);Actinobacteria{phylum}(99);Actinobacteria{class}(99);{order}(99);{family}(99);{genus}(99);uncultured_Actinomycetales_bacterium{species}(99)	Bacteria	Actinobacteria	Actinobacteria				uncultured_Actinomycetales_bacterium
ASV1115	74	340	0	0	0	204	0	0	0	0	0	0	0	0	0	0	0	618	Bacteria{superkingdom}(99);Actinobacteria{phylum}(99);Actinobacteria{class}(99);Actinomycetales{order}(99);Nocardioidaceae{family}(99);Aeromicrobium{genus}(99);Unassigned{species}(0)	Bacteria	Actinobacteria	Actinobacteria	Actinomycetales	Nocardioidaceae	Aeromicrobium	Unassigned
ASV1116	59	9	0	28	0	44	0	15	17	0	0	0	90	96	0	60	59	477	Bacteria{superkingdom}(87);Actinobacteria{phylum}(87);Actinobacteria{class}(87);Solirubrobacterales{order}(87);Conexibacteraceae{family}(87);Conexibacter{genus}(87);Unassigned{species}(0)	Bacteria	Actinobacteria	Actinobacteria	Solirubrobacterales	Conexibacteraceae	Conexibacter	Unassigned
ASV1117	0	0	23	0	0	106	0	0	0	0	0	0	0	0	0	0	0	129	Bacteria{superkingdom}(93);Planctomycetes{phylum}(93);Planctomycetia{class}(93);Planctomycetales{order}(93);Planctomycetaceae{family}(93);Thermogutta{genus}(93);Unassigned{species}(0)	Bacteria	Planctomycetes	Planctomycetia	Planctomycetales	Planctomycetaceae	Thermogutta	Unassigned
ASV1119	0	0	13	0	7	54	0	0	0	0	0	0	140	0	0	0	0	214	Bacteria{superkingdom}(100);candidate_division_WPS-1{phylum}(100);{class}(100);{order}(100);{family}(100);WPS-1_genera_incertae_sedis{genus}(100);Unassigned{species}(0)	Bacteria	candidate_division_WPS-1				WPS-1_genera_incertae_sedis	Unassigned
ASV1120	0	0	0	0	0	0	158	66	90	68	77	206	156	85	26	12	158	1102	Bacteria{superkingdom}(98);Proteobacteria{phylum}(98);Alphaproteobacteria{class}(98);Rhodospirillales{order}(98);Acetobacteraceae{family}(98);Roseomonas{genus}(98);Unassigned{species}(0)	Bacteria	Proteobacteria	Alphaproteobacteria	Rhodospirillales	Acetobacteraceae	Roseomonas	Unassigned
ASV1121	0	311	5	0	0	0	16	12	466	34	0	47	0	0	9	43	12	955	Bacteria{superkingdom}(100);Proteobacteria{phylum}(100);Alphaproteobacteria{class}(100);Sphingomonadales{order}(100);Sphingomonadaceae{family}(100);Unassigned{genus}(0);Unassigned{species}(0)	Bacteria	Proteobacteria	Alphaproteobacteria	Sphingomonadales	Sphingomonadaceae	Unassigned	Unassigned
ASV1122	0	0	51	0	0	0	186	0	229	50	66	77	0	0	0	0	0	659	Bacteria{superkingdom}(100);Acidobacteria{phylum}(100);Acidobacteria_Gp6{class}(100);{order}(100);{family}(100);Gp6{genus}(100);Unassigned{species}(0)	Bacteria	Acidobacteria	Acidobacteria_Gp6			Gp6	Unassigned
ASV1123	115	0	83	131	56	127	0	13	26	19	0	0	0	0	0	0	0	570	Bacteria{superkingdom}(85);Actinobacteria{phylum}(85);Actinobacteria{class}(85);Solirubrobacterales{order}(85);Conexibacteraceae{family}(85);Conexibacter{genus}(85);uncultured_Rubrobacteraceae_bacterium{species}(85)	Bacteria	Actinobacteria	Actinobacteria	Solirubrobacterales	Conexibacteraceae	Conexibacter	uncultured_Rubrobacteraceae_bacterium
ASV1124	71	0	102	59	46	61	44	0	0	0	0	0	0	0	0	0	41	424	Bacteria{superkingdom}(100);Acidobacteria{phylum}(100);Acidobacteria_Gp6{class}(100);{order}(100);{family}(100);Gp6{genus}(100);Unassigned{species}(0)	Bacteria	Acidobacteria	Acidobacteria_Gp6			Gp6	Unassigned
ASV1125	38	24	0	0	9	69	0	0	0	0	0	10	138	0	0	21	0	309	Bacteria{superkingdom}(95);Proteobacteria{phylum}(95);Deltaproteobacteria{class}(95);Myxococcales{order}(95);Sandaracinaceae{family}(95);Sandaracinus{genus}(95);uncultured_Myxococcales_bacterium{species}(95)	Bacteria	Proteobacteria	Deltaproteobacteria	Myxococcales	Sandaracinaceae	Sandaracinus	uncultured_Myxococcales_bacterium
ASV1126	0	34	0	0	0	25	0	23	0	0	13	52	157	0	0	65	208	577	Bacteria{superkingdom}(90);Actinobacteria{phylum}(90);Actinobacteria{class}(90);Acidimicrobiales{order}(90);Unassigned{family}(0);Unassigned{genus}(0);Unassigned{species}(0)	Bacteria	Actinobacteria	Actinobacteria	Acidimicrobiales	Unassigned	Unassigned	Unassigned
ASV1127	0	0	0	0	0	19	0	0	0	0	0	0	0	0	0	0	0	19	Bacteria{superkingdom}(100);Proteobacteria{phylum}(100);Alphaproteobacteria{class}(100);Rhizobiales{order}(100);Unassigned{family}(0);Unassigned{genus}(0);Unassigned{species}(0)	Bacteria	Proteobacteria	Alphaproteobacteria	Rhizobiales	Unassigned	Unassigned	Unassigned
ASV1128	22	0	6	0	0	0	0	0	0	0	0	0	0	0	0	0	0	28	Bacteria{superkingdom}(100);Actinobacteria{phylum}(100);Actinobacteria{class}(100);Actinomycetales{order}(100);Promicromonosporaceae{family}(100);Promicromonospora{genus}(100);Unassigned{species}(0)	Bacteria	Actinobacteria	Actinobacteria	Actinomycetales	Promicromonosporaceae	Promicromonospora	Unassigned
ASV1129	66	87	0	0	0	0	0	0	0	0	0	0	0	0	0	0	0	153	Bacteria{superkingdom}(99);Actinobacteria{phylum}(99);Actinobacteria{class}(99);Actinomycetales{order}(99);{family}(99);{genus}(99);uncultured_Blastococcus_sp.{species}(99)	Bacteria	Actinobacteria	Actinobacteria	Actinomycetales			uncultured_Blastococcus_sp.
ASV1130	29	9	17	20	19	0	27	17	50	17	0	10	38	4	0	0	59	316	Bacteria{superkingdom}(99);Proteobacteria{phylum}(99);Deltaproteobacteria{class}(99);Bdellovibrionales{order}(99);Bdellovibrionaceae{family}(99);Vampirovibrio{genus}(99);uncultured_bacterium{species}(99)	Bacteria	Proteobacteria	Deltaproteobacteria	Bdellovibrionales	Bdellovibrionaceae	Vampirovibrio	uncultured_bacterium
ASV1131	41	0	12	138	0	16	0	0	0	0	45	83	108	94	97	43	48	725	Bacteria{superkingdom}(100);Nitrospirae{phylum}(100);Nitrospira{class}(100);Nitrospirales{order}(100);Nitrospiraceae{family}(100);Nitrospira{genus}(100);Unassigned{species}(0)	Bacteria	Nitrospirae	Nitrospira	Nitrospirales	Nitrospiraceae	Nitrospira	Unassigned
ASV1132	0	0	0	18	31	0	23	0	0	0	0	0	0	0	0	0	0	72	Bacteria{superkingdom}(100);Acidobacteria{phylum}(100);Acidobacteria_Gp7{class}(100);{order}(100);{family}(100);Gp7{genus}(100);Unassigned{species}(0)	Bacteria	Acidobacteria	Acidobacteria_Gp7			Gp7	Unassigned
ASV1133	0	1125	0	0	0	0	0	0	0	0	0	0	0	0	0	0	0	1125	Bacteria{superkingdom}(94);Acidobacteria{phylum}(94);Acidobacteria_Gp6{class}(94);{order}(94);{family}(94);Gp6{genus}(94);uncultured_Desulfitobacterium_sp.{species}(94)	Bacteria	Acidobacteria	Acidobacteria_Gp6			Gp6	uncultured_Desulfitobacterium_sp.
ASV1134	0	0	43	27	0	72	0	0	0	0	0	0	15	0	0	0	19	176	Bacteria{superkingdom}(100);Planctomycetes{phylum}(100);Planctomycetia{class}(100);Planctomycetales{order}(100);Planctomycetaceae{family}(100);{genus}(100);planctomycete_WY69{species}(100)	Bacteria	Planctomycetes	Planctomycetia	Planctomycetales	Planctomycetaceae		planctomycete_WY69
ASV1135	0	0	59	0	0	0	0	0	0	0	0	0	16	0	0	0	8	83	Bacteria{superkingdom}(97);Acidobacteria{phylum}(97);Acidobacteria_Gp4{class}(97);{order}(97);{family}(97);Aridibacter{genus}(97);Unassigned{species}(0)	Bacteria	Acidobacteria	Acidobacteria_Gp4			Aridibacter	Unassigned
ASV1137	6	0	19	163	27	0	0	0	0	0	0	0	0	0	0	0	0	215	Bacteria{superkingdom}(99);Bacteroidetes{phylum}(99);Sphingobacteriia{class}(99);Sphingobacteriales{order}(99);Chitinophagaceae{family}(99);{genus}(99);Unassigned{species}(0)	Bacteria	Bacteroidetes	Sphingobacteriia	Sphingobacteriales	Chitinophagaceae		Unassigned
ASV1138	0	245	0	0	0	0	51	0	0	0	22	0	42	0	0	23	0	383	Bacteria{superkingdom}(100);Acidobacteria{phylum}(100);Acidobacteria_Gp6{class}(100);{order}(100);{family}(100);Gp6{genus}(100);Unassigned{species}(0)	Bacteria	Acidobacteria	Acidobacteria_Gp6			Gp6	Unassigned
ASV1139	82	18	0	0	0	21	0	0	0	0	0	0	0	0	0	0	0	121	Bacteria{superkingdom}(100);Chloroflexi{phylum}(100);Caldilineae{class}(100);Caldilineales{order}(100);Caldilineaceae{family}(100);Litorilinea{genus}(100);Unassigned{species}(0)	Bacteria	Chloroflexi	Caldilineae	Caldilineales	Caldilineaceae	Litorilinea	Unassigned
ASV1140	28	0	0	0	0	45	33	0	49	0	0	40	26	86	0	31	83	421	Bacteria{superkingdom}(100);Chloroflexi{phylum}(100);{class}(100);{order}(100);{family}(100);{genus}(100);uncultured_Anaerolineae_bacterium{species}(100)	Bacteria	Chloroflexi					uncultured_Anaerolineae_bacterium
ASV1141	0	0	0	0	0	17	31	0	0	0	0	0	0	0	0	0	0	48	Bacteria{superkingdom}(100);Acidobacteria{phylum}(100);Acidobacteria_Gp6{class}(100);{order}(100);{family}(100);Gp6{genus}(100);Unassigned{species}(0)	Bacteria	Acidobacteria	Acidobacteria_Gp6			Gp6	Unassigned
ASV1142	0	0	0	49	16	54	0	0	0	0	0	0	0	0	0	0	0	119	Bacteria{superkingdom}(98);Proteobacteria{phylum}(98);Alphaproteobacteria{class}(98);Rhodospirillales{order}(98);Acetobacteraceae{family}(98);Roseomonas{genus}(98);Unassigned{species}(0)	Bacteria	Proteobacteria	Alphaproteobacteria	Rhodospirillales	Acetobacteraceae	Roseomonas	Unassigned
ASV1143	0	0	15	12	26	17	309	335	64	246	6	33	0	0	0	0	0	1063	Bacteria{superkingdom}(100);Bacteroidetes{phylum}(100);Sphingobacteriia{class}(100);Sphingobacteriales{order}(100);Chitinophagaceae{family}(100);{genus}(100);Unassigned{species}(0)	Bacteria	Bacteroidetes	Sphingobacteriia	Sphingobacteriales	Chitinophagaceae		Unassigned
ASV1144	0	0	0	0	0	0	0	0	0	0	18	0	0	0	0	0	0	18	Bacteria{superkingdom}(100);Bacteroidetes{phylum}(100);Sphingobacteriia{class}(100);Sphingobacteriales{order}(100);Chitinophagaceae{family}(100);Unassigned{genus}(0);Unassigned{species}(0)	Bacteria	Bacteroidetes	Sphingobacteriia	Sphingobacteriales	Chitinophagaceae	Unassigned	Unassigned
ASV1146	0	0	130	46	0	34	0	0	0	0	0	0	0	0	0	0	0	210	Bacteria{superkingdom}(100);Actinobacteria{phylum}(100);Actinobacteria{class}(100);Actinomycetales{order}(100);Streptosporangiaceae{family}(100);Nonomuraea{genus}(100);Unassigned{species}(0)	Bacteria	Actinobacteria	Actinobacteria	Actinomycetales	Streptosporangiaceae	Nonomuraea	Unassigned
ASV1147	0	0	0	0	29	0	11	11	23	0	0	17	56	0	0	0	14	161	Bacteria{superkingdom}(94);Bacteroidetes{phylum}(94);Sphingobacteriia{class}(94);Sphingobacteriales{order}(94);Chitinophagaceae{family}(94);{genus}(94);uncultured_Cytophaga_sp.{species}(94)	Bacteria	Bacteroidetes	Sphingobacteriia	Sphingobacteriales	Chitinophagaceae		uncultured_Cytophaga_sp.
ASV1148	19	15	135	34	11	57	93	64	11	73	24	52	19	16	178	0	82	883	Bacteria{superkingdom}(100);Actinobacteria{phylum}(100);Actinobacteria{class}(100);Acidimicrobiales{order}(100);Unassigned{family}(0);Unassigned{genus}(0);Unassigned{species}(0)	Bacteria	Actinobacteria	Actinobacteria	Acidimicrobiales	Unassigned	Unassigned	Unassigned
ASV1149	0	22	0	0	0	0	0	0	0	0	0	0	0	0	0	30	0	52	Bacteria{superkingdom}(100);Actinobacteria{phylum}(100);Actinobacteria{class}(100);Actinomycetales{order}(100);Streptomycetaceae{family}(100);Streptomyces{genus}(100);Unassigned{species}(0)	Bacteria	Actinobacteria	Actinobacteria	Actinomycetales	Streptomycetaceae	Streptomyces	Unassigned
ASV1150	0	0	0	0	0	0	0	0	0	0	0	0	0	0	0	50	0	50	Bacteria{superkingdom}(100);Chloroflexi{phylum}(100);Chloroflexia{class}(100);Kallotenuales{order}(100);Kallotenuaceae{family}(100);Kallotenue{genus}(100);Unassigned{species}(0)	Bacteria	Chloroflexi	Chloroflexia	Kallotenuales	Kallotenuaceae	Kallotenue	Unassigned
ASV1151	24	0	8	19	90	64	0	0	0	0	0	0	0	0	0	0	23	228	Bacteria{superkingdom}(100);Verrucomicrobia{phylum}(100);Opitutae{class}(100);Opitutales{order}(100);Opitutaceae{family}(100);Opitutus{genus}(100);Unassigned{species}(0)	Bacteria	Verrucomicrobia	Opitutae	Opitutales	Opitutaceae	Opitutus	Unassigned
ASV1152	20	0	0	114	12	176	0	0	0	0	0	0	0	0	0	0	0	322	Bacteria{superkingdom}(100);Actinobacteria{phylum}(100);Actinobacteria{class}(100);Actinomycetales{order}(100);Propionibacteriaceae{family}(100);Microlunatus{genus}(100);Unassigned{species}(0)	Bacteria	Actinobacteria	Actinobacteria	Actinomycetales	Propionibacteriaceae	Microlunatus	Unassigned
ASV1153	0	0	0	0	0	0	0	0	0	108	0	0	0	0	0	0	0	108	Bacteria{superkingdom}(93);Acidobacteria{phylum}(93);Acidobacteria_Gp4{class}(93);{order}(93);{family}(93);Gp4{genus}(93);uncultured_Rhodopseudomonas_sp.{species}(93)	Bacteria	Acidobacteria	Acidobacteria_Gp4			Gp4	uncultured_Rhodopseudomonas_sp.
ASV1154	51	24	24	18	31	13	17	0	0	12	0	15	0	19	22	56	0	302	Bacteria{superkingdom}(97);Actinobacteria{phylum}(97);Actinobacteria{class}(97);Solirubrobacterales{order}(97);{family}(97);{genus}(97);uncultured_bacterium{species}(97)	Bacteria	Actinobacteria	Actinobacteria	Solirubrobacterales			uncultured_bacterium
ASV1155	0	0	252	112	0	0	0	0	0	0	0	0	0	0	0	0	0	364	Bacteria{superkingdom}(94);Actinobacteria{phylum}(94);Actinobacteria{class}(94);Actinomycetales{order}(94);Pseudonocardiaceae{family}(94);Kibdelosporangium{genus}(94);Unassigned{species}(0)	Bacteria	Actinobacteria	Actinobacteria	Actinomycetales	Pseudonocardiaceae	Kibdelosporangium	Unassigned
ASV1156	0	0	0	115	0	0	0	0	0	0	0	0	0	0	0	0	0	115	Bacteria{superkingdom}(100);Actinobacteria{phylum}(100);Actinobacteria{class}(100);Actinomycetales{order}(100);Micromonosporaceae{family}(100);Phytomonospora{genus}(100);Unassigned{species}(0)	Bacteria	Actinobacteria	Actinobacteria	Actinomycetales	Micromonosporaceae	Phytomonospora	Unassigned
ASV1157	0	0	0	8	15	29	0	0	0	0	0	0	0	16	0	0	0	68	Bacteria{superkingdom}(97);Proteobacteria{phylum}(97);Gammaproteobacteria{class}(97);{order}(97);{family}(97);{genus}(97);uncultured_Steroidobacter_sp.{species}(97)	Bacteria	Proteobacteria	Gammaproteobacteria				uncultured_Steroidobacter_sp.
ASV1158	0	13	0	0	0	0	0	0	0	0	0	0	0	0	5	0	0	18	Bacteria{superkingdom}(100);Proteobacteria{phylum}(100);Gammaproteobacteria{class}(100);{order}(100);{family}(100);{genus}(100);bacterium_endosymbiont_of_Onthophagus_Taurus{species}(100)	Bacteria	Proteobacteria	Gammaproteobacteria				bacterium_endosymbiont_of_Onthophagus_Taurus
ASV1159	73	27	54	44	0	0	24	0	19	16	0	0	0	0	0	0	0	257	Bacteria{superkingdom}(95);Proteobacteria{phylum}(95);Deltaproteobacteria{class}(95);{order}(95);{family}(95);{genus}(95);Unassigned{species}(0)	Bacteria	Proteobacteria	Deltaproteobacteria				Unassigned
ASV1160	0	13	32	27	63	39	36	50	43	34	29	41	95	139	173	68	124	1006	Bacteria{superkingdom}(87);Actinobacteria{phylum}(87);Actinobacteria{class}(87);Actinomycetales{order}(87);Nocardioidaceae{family}(87);Nocardioides{genus}(87);Nocardioides_dilutus{species}(87)	Bacteria	Actinobacteria	Actinobacteria	Actinomycetales	Nocardioidaceae	Nocardioides	Nocardioides_dilutus
ASV1161	0	0	40	0	13	8	125	338	61	31	28	47	0	8	0	0	414	1113	Bacteria{superkingdom}(94);Bacteroidetes{phylum}(94);Sphingobacteriia{class}(94);Sphingobacteriales{order}(94);Rhodothermaceae{family}(94);{genus}(94);uncultured_bacterium{species}(94)	Bacteria	Bacteroidetes	Sphingobacteriia	Sphingobacteriales	Rhodothermaceae		uncultured_bacterium
ASV1162	0	29	47	0	0	0	27	42	0	68	0	18	15	0	27	0	0	273	Bacteria{superkingdom}(100);Bacteroidetes{phylum}(100);Sphingobacteriia{class}(100);Sphingobacteriales{order}(100);Chitinophagaceae{family}(100);Unassigned{genus}(0);Unassigned{species}(0)	Bacteria	Bacteroidetes	Sphingobacteriia	Sphingobacteriales	Chitinophagaceae	Unassigned	Unassigned
ASV1163	134	0	0	356	0	146	0	0	0	0	126	0	0	0	0	0	0	762	Bacteria{superkingdom}(99);Actinobacteria{phylum}(99);Actinobacteria{class}(99);Actinomycetales{order}(99);Streptomycetaceae{family}(99);Streptomyces{genus}(99);Unassigned{species}(0)	Bacteria	Actinobacteria	Actinobacteria	Actinomycetales	Streptomycetaceae	Streptomyces	Unassigned
ASV1164	23	0	60	7	58	41	0	0	0	15	11	24	68	55	12	33	49	456	Bacteria{superkingdom}(88);candidate_division_WPS-1{phylum}(88);{class}(88);{order}(88);{family}(88);WPS-1_genera_incertae_sedis{genus}(88);uncultured_Phycisphaera_sp.{species}(88)	Bacteria	candidate_division_WPS-1				WPS-1_genera_incertae_sedis	uncultured_Phycisphaera_sp.
ASV1166	0	16	0	62	0	32	0	0	0	30	0	0	20	71	52	68	71	422	Bacteria{superkingdom}(100);Acidobacteria{phylum}(100);Acidobacteria_Gp6{class}(100);{order}(100);{family}(100);Gp6{genus}(100);Unassigned{species}(0)	Bacteria	Acidobacteria	Acidobacteria_Gp6			Gp6	Unassigned
ASV1167	0	134	0	0	0	0	0	38	118	0	0	73	0	0	0	0	0	363	Bacteria{superkingdom}(87);Bacteroidetes{phylum}(87);Sphingobacteriia{class}(87);Sphingobacteriales{order}(87);Chitinophagaceae{family}(87);{genus}(87);Unassigned{species}(0)	Bacteria	Bacteroidetes	Sphingobacteriia	Sphingobacteriales	Chitinophagaceae		Unassigned
ASV1168	15	0	4	0	0	0	8	0	0	0	0	0	0	0	0	10	0	37	Bacteria{superkingdom}(100);Proteobacteria{phylum}(100);Alphaproteobacteria{class}(100);Rhizobiales{order}(100);{family}(100);{genus}(100);Unassigned{species}(0)	Bacteria	Proteobacteria	Alphaproteobacteria	Rhizobiales			Unassigned
ASV1169	64	0	31	23	0	59	131	27	104	0	0	0	47	0	0	0	18	504	Bacteria{superkingdom}(90);Proteobacteria{phylum}(90);Deltaproteobacteria{class}(90);Myxococcales{order}(90);Labilitrichaceae{family}(90);Labilithrix{genus}(90);uncultured_delta_proteobacterium{species}(90)	Bacteria	Proteobacteria	Deltaproteobacteria	Myxococcales	Labilitrichaceae	Labilithrix	uncultured_delta_proteobacterium
ASV1170	0	87	0	0	0	0	0	66	0	160	0	0	0	0	505	0	0	818	Bacteria{superkingdom}(100);Actinobacteria{phylum}(100);Unassigned{class}(0);Unassigned{order}(0);Unassigned{family}(0);Unassigned{genus}(0);Unassigned{species}(0)	Bacteria	Actinobacteria	Unassigned	Unassigned	Unassigned	Unassigned	Unassigned
ASV1171	0	14	0	0	25	36	0	0	15	19	0	16	28	0	0	0	0	153	Bacteria{superkingdom}(82);Planctomycetes{phylum}(82);Planctomycetia{class}(82);Planctomycetales{order}(82);Planctomycetaceae{family}(82);Pirellula{genus}(82);Unassigned{species}(0)	Bacteria	Planctomycetes	Planctomycetia	Planctomycetales	Planctomycetaceae	Pirellula	Unassigned
ASV1172	42	0	0	34	115	47	0	0	0	0	0	0	0	0	0	0	0	238	Bacteria{superkingdom}(100);Proteobacteria{phylum}(100);Alphaproteobacteria{class}(100);Rhizobiales{order}(100);Hyphomicrobiaceae{family}(100);Hyphomicrobium{genus}(100);Unassigned{species}(0)	Bacteria	Proteobacteria	Alphaproteobacteria	Rhizobiales	Hyphomicrobiaceae	Hyphomicrobium	Unassigned
ASV1174	80	0	0	0	0	0	32	0	0	0	0	0	0	0	0	0	0	112	Bacteria{superkingdom}(100);{phylum}(100);{class}(100);{order}(100);{family}(100);{genus}(100);uncultured_Actinomyces_sp.{species}(100)	Bacteria						uncultured_Actinomyces_sp.
ASV1175	49	0	44	0	11	0	0	0	42	0	0	0	0	0	0	0	0	146	Bacteria{superkingdom}(100);Planctomycetes{phylum}(100);Planctomycetia{class}(100);Planctomycetales{order}(100);Planctomycetaceae{family}(100);Unassigned{genus}(0);Unassigned{species}(0)	Bacteria	Planctomycetes	Planctomycetia	Planctomycetales	Planctomycetaceae	Unassigned	Unassigned
ASV1176	0	30	20	12	0	0	70	91	31	87	0	55	51	43	123	53	41	707	Bacteria{superkingdom}(100);Proteobacteria{phylum}(100);Alphaproteobacteria{class}(100);Rhodospirillales{order}(100);Rhodospirillaceae{family}(100);Constrictibacter{genus}(100);uncultured_bacterium{species}(100)	Bacteria	Proteobacteria	Alphaproteobacteria	Rhodospirillales	Rhodospirillaceae	Constrictibacter	uncultured_bacterium
ASV1178	29	0	18	0	32	0	24	0	0	0	0	35	78	0	0	0	0	216	Bacteria{superkingdom}(95);Proteobacteria{phylum}(95);Alphaproteobacteria{class}(95);Rhodospirillales{order}(95);Unassigned{family}(0);Unassigned{genus}(0);Unassigned{species}(0)	Bacteria	Proteobacteria	Alphaproteobacteria	Rhodospirillales	Unassigned	Unassigned	Unassigned
ASV1179	0	77	0	0	80	160	0	0	0	0	0	0	68	0	0	75	124	584	Bacteria{superkingdom}(100);Actinobacteria{phylum}(100);Actinobacteria{class}(100);Actinomycetales{order}(100);Nocardioidaceae{family}(100);Nocardioides{genus}(100);Unassigned{species}(0)	Bacteria	Actinobacteria	Actinobacteria	Actinomycetales	Nocardioidaceae	Nocardioides	Unassigned
ASV1180	0	64	0	42	0	32	0	58	0	146	0	116	0	0	0	0	29	487	Bacteria{superkingdom}(100);Chloroflexi{phylum}(100);{class}(100);{order}(100);{family}(100);{genus}(100);uncultured_Anaerolineae_bacterium{species}(100)	Bacteria	Chloroflexi					uncultured_Anaerolineae_bacterium
ASV1181	41	0	81	0	0	28	0	0	0	0	0	0	0	0	0	0	0	150	Bacteria{superkingdom}(86);Actinobacteria{phylum}(86);Actinobacteria{class}(86);Actinomycetales{order}(86);Unassigned{family}(0);Unassigned{genus}(0);Unassigned{species}(0)	Bacteria	Actinobacteria	Actinobacteria	Actinomycetales	Unassigned	Unassigned	Unassigned
ASV1182	16	0	22	8	0	0	28	68	36	69	32	17	169	0	15	0	194	674	Bacteria{superkingdom}(100);Acidobacteria{phylum}(100);Acidobacteria_Gp6{class}(100);{order}(100);{family}(100);Gp6{genus}(100);Unassigned{species}(0)	Bacteria	Acidobacteria	Acidobacteria_Gp6			Gp6	Unassigned
ASV1183	24	0	0	0	40	26	27	0	0	0	0	0	0	0	0	0	0	117	Bacteria{superkingdom}(97);Proteobacteria{phylum}(97);Gammaproteobacteria{class}(97);{order}(97);{family}(97);{genus}(97);uncultured_Steroidobacter_sp.{species}(97)	Bacteria	Proteobacteria	Gammaproteobacteria				uncultured_Steroidobacter_sp.
ASV1184	0	73	0	0	0	0	55	0	58	0	0	55	53	112	281	124	109	920	Bacteria{superkingdom}(100);Proteobacteria{phylum}(100);Betaproteobacteria{class}(100);{order}(100);{family}(100);{genus}(100);Unassigned{species}(0)	Bacteria	Proteobacteria	Betaproteobacteria				Unassigned
ASV1185	0	0	0	43	0	0	0	0	0	0	0	0	0	0	0	0	0	43	Bacteria{superkingdom}(100);Acidobacteria{phylum}(100);Acidobacteria_Gp7{class}(100);{order}(100);{family}(100);Gp7{genus}(100);Unassigned{species}(0)	Bacteria	Acidobacteria	Acidobacteria_Gp7			Gp7	Unassigned
ASV1187	51	0	46	73	23	57	0	9	7	0	52	18	9	0	0	0	24	369	Bacteria{superkingdom}(89);Planctomycetes{phylum}(89);Planctomycetia{class}(89);Planctomycetales{order}(89);Planctomycetaceae{family}(89);{genus}(89);Unassigned{species}(0)	Bacteria	Planctomycetes	Planctomycetia	Planctomycetales	Planctomycetaceae		Unassigned
ASV1188	13	0	0	44	15	57	0	15	0	22	0	0	10	39	0	0	18	233	Bacteria{superkingdom}(100);Proteobacteria{phylum}(100);Alphaproteobacteria{class}(100);Rhizobiales{order}(100);Unassigned{family}(0);Unassigned{genus}(0);Unassigned{species}(0)	Bacteria	Proteobacteria	Alphaproteobacteria	Rhizobiales	Unassigned	Unassigned	Unassigned
ASV1189	0	0	0	0	0	0	0	0	0	0	0	632	0	0	0	0	0	632	Bacteria{superkingdom}(94);Bacteroidetes{phylum}(94);Cytophagia{class}(94);Cytophagales{order}(94);Cytophagaceae{family}(94);Rufibacter{genus}(94);uncultured_bacterium{species}(94)	Bacteria	Bacteroidetes	Cytophagia	Cytophagales	Cytophagaceae	Rufibacter	uncultured_bacterium
ASV1190	28	48	0	0	86	0	0	29	0	0	0	0	86	0	0	0	77	354	Bacteria{superkingdom}(86);Planctomycetes{phylum}(86);Planctomycetia{class}(86);Planctomycetales{order}(86);Planctomycetaceae{family}(86);Gimesia{genus}(86);Unassigned{species}(0)	Bacteria	Planctomycetes	Planctomycetia	Planctomycetales	Planctomycetaceae	Gimesia	Unassigned
ASV1191	26	0	0	0	0	0	0	0	0	0	0	0	0	0	0	0	0	26	Bacteria{superkingdom}(100);Proteobacteria{phylum}(100);Betaproteobacteria{class}(100);Burkholderiales{order}(100);Burkholderiaceae{family}(100);Cupriavidus{genus}(100);Unassigned{species}(0)	Bacteria	Proteobacteria	Betaproteobacteria	Burkholderiales	Burkholderiaceae	Cupriavidus	Unassigned
ASV1192	0	0	0	12	12	0	0	0	0	0	0	23	22	17	44	18	0	148	Bacteria{superkingdom}(100);Proteobacteria{phylum}(100);Alphaproteobacteria{class}(100);Alphaproteobacteria_incertae_sedis{order}(100);{family}(100);Rhizomicrobium{genus}(100);Unassigned{species}(0)	Bacteria	Proteobacteria	Alphaproteobacteria	Alphaproteobacteria_incertae_sedis		Rhizomicrobium	Unassigned
ASV1193	39	0	26	0	0	65	0	34	0	0	0	17	0	0	0	59	0	240	Bacteria{superkingdom}(100);{phylum}(100);{class}(100);{order}(100);{family}(100);{genus}(100);uncultured_Actinomyces_sp.{species}(100)	Bacteria						uncultured_Actinomyces_sp.
ASV1194	5	0	0	0	5	25	0	0	0	0	0	51	0	0	49	71	0	206	Bacteria{superkingdom}(95);Proteobacteria{phylum}(95);Deltaproteobacteria{class}(95);Myxococcales{order}(95);Kofleriaceae{family}(95);Kofleria{genus}(95);uncultured_Anaeromyxobacter_sp.{species}(95)	Bacteria	Proteobacteria	Deltaproteobacteria	Myxococcales	Kofleriaceae	Kofleria	uncultured_Anaeromyxobacter_sp.
ASV1195	0	0	0	0	113	0	0	0	0	0	0	0	0	0	0	0	0	113	Bacteria{superkingdom}(100);Bacteroidetes{phylum}(100);Flavobacteriia{class}(100);Flavobacteriales{order}(100);Flavobacteriaceae{family}(100);Flavobacterium{genus}(100);Unassigned{species}(0)	Bacteria	Bacteroidetes	Flavobacteriia	Flavobacteriales	Flavobacteriaceae	Flavobacterium	Unassigned
ASV1196	8	0	193	0	28	0	28	224	174	36	0	59	0	0	0	0	0	750	Bacteria{superkingdom}(84);Proteobacteria{phylum}(84);Gammaproteobacteria{class}(84);Xanthomonadales{order}(84);Sinobacteraceae{family}(84);{genus}(84);Unassigned{species}(0)	Bacteria	Proteobacteria	Gammaproteobacteria	Xanthomonadales	Sinobacteraceae		Unassigned
ASV1197	269	0	66	29	112	24	0	0	0	0	0	0	0	0	0	0	0	500	Bacteria{superkingdom}(100);Proteobacteria{phylum}(100);Gammaproteobacteria{class}(100);Unassigned{order}(0);Unassigned{family}(0);Unassigned{genus}(0);Unassigned{species}(0)	Bacteria	Proteobacteria	Gammaproteobacteria	Unassigned	Unassigned	Unassigned	Unassigned
ASV1198	53	0	18	0	0	0	0	0	0	0	7	0	0	0	0	0	0	78	Bacteria{superkingdom}(97);Planctomycetes{phylum}(97);Planctomycetia{class}(97);Planctomycetales{order}(97);Planctomycetaceae{family}(97);Blastopirellula{genus}(97);uncultured_bacterium{species}(97)	Bacteria	Planctomycetes	Planctomycetia	Planctomycetales	Planctomycetaceae	Blastopirellula	uncultured_bacterium
ASV1199	0	0	26	0	22	20	9	0	0	0	0	0	0	0	0	10	0	87	Bacteria{superkingdom}(100);Planctomycetes{phylum}(100);Planctomycetia{class}(100);Planctomycetales{order}(100);Planctomycetaceae{family}(100);Unassigned{genus}(0);Unassigned{species}(0)	Bacteria	Planctomycetes	Planctomycetia	Planctomycetales	Planctomycetaceae	Unassigned	Unassigned
ASV1200	0	0	0	77	79	0	7	21	0	0	60	8	14	38	54	186	0	544	Bacteria{superkingdom}(100);Bacteroidetes{phylum}(100);Cytophagia{class}(100);Cytophagales{order}(100);Cytophagaceae{family}(100);Dyadobacter{genus}(100);Unassigned{species}(0)	Bacteria	Bacteroidetes	Cytophagia	Cytophagales	Cytophagaceae	Dyadobacter	Unassigned
ASV1201	44	73	0	0	32	0	75	0	44	34	44	40	0	0	0	0	0	386	Bacteria{superkingdom}(92);Proteobacteria{phylum}(92);Betaproteobacteria{class}(92);{order}(92);{family}(92);{genus}(92);uncultured_Alcaligenaceae_bacterium{species}(92)	Bacteria	Proteobacteria	Betaproteobacteria				uncultured_Alcaligenaceae_bacterium
ASV1202	4	163	0	0	17	0	76	0	355	55	0	38	0	0	0	0	0	708	Bacteria{superkingdom}(99);Chloroflexi{phylum}(99);Chloroflexia{class}(99);{order}(99);{family}(99);{genus}(99);uncultured_bacterium{species}(99)	Bacteria	Chloroflexi	Chloroflexia				uncultured_bacterium
ASV1204	27	0	65	79	55	84	0	0	0	0	0	0	0	0	0	0	0	310	Bacteria{superkingdom}(100);Proteobacteria{phylum}(100);Alphaproteobacteria{class}(100);Rhizobiales{order}(100);Hyphomicrobiaceae{family}(100);Devosia{genus}(100);Unassigned{species}(0)	Bacteria	Proteobacteria	Alphaproteobacteria	Rhizobiales	Hyphomicrobiaceae	Devosia	Unassigned
ASV1206	20	0	27	19	24	34	18	23	11	16	0	17	7	0	0	0	34	250	Bacteria{superkingdom}(95);Chloroflexi{phylum}(95);{class}(95);{order}(95);{family}(95);{genus}(95);uncultured_Firmicutes_bacterium{species}(95)	Bacteria	Chloroflexi					uncultured_Firmicutes_bacterium
ASV1207	58	0	0	0	0	106	0	0	0	0	0	0	0	0	0	0	0	164	Bacteria{superkingdom}(100);Acidobacteria{phylum}(100);Acidobacteria_Gp6{class}(100);{order}(100);{family}(100);Gp6{genus}(100);Unassigned{species}(0)	Bacteria	Acidobacteria	Acidobacteria_Gp6			Gp6	Unassigned
ASV1208	32	0	6	2	0	63	0	0	0	0	0	0	0	0	0	0	0	103	Bacteria{superkingdom}(84);Chloroflexi{phylum}(84);Thermomicrobia{class}(84);Sphaerobacterales{order}(84);Sphaerobacteraceae{family}(84);Nitrolancea{genus}(84);Unassigned{species}(0)	Bacteria	Chloroflexi	Thermomicrobia	Sphaerobacterales	Sphaerobacteraceae	Nitrolancea	Unassigned
ASV1209	35	9	0	12	26	19	134	299	77	89	33	27	101	0	0	0	64	925	Bacteria{superkingdom}(100);Acidobacteria{phylum}(100);Acidobacteria_Gp4{class}(100);{order}(100);{family}(100);{genus}(100);uncultured_Pelobacter_sp.{species}(100)	Bacteria	Acidobacteria	Acidobacteria_Gp4				uncultured_Pelobacter_sp.
ASV1210	16	54	51	35	50	30	0	0	0	27	0	0	76	20	11	10	20	400	Bacteria{superkingdom}(93);{phylum}(93);{class}(93);{order}(93);{family}(93);{genus}(93);Unassigned{species}(0)	Bacteria						Unassigned
ASV1211	31	0	33	60	41	87	0	0	0	0	5	0	25	22	0	41	9	354	Bacteria{superkingdom}(80);Proteobacteria{phylum}(80);Alphaproteobacteria{class}(80);Rhodospirillales{order}(80);{family}(80);{genus}(80);uncultured_Gluconobacter_sp.{species}(80)	Bacteria	Proteobacteria	Alphaproteobacteria	Rhodospirillales			uncultured_Gluconobacter_sp.
ASV1212	87	0	60	124	29	112	0	0	0	0	0	0	0	0	0	124	0	536	Bacteria{superkingdom}(94);Actinobacteria{phylum}(94);Actinobacteria{class}(94);Actinomycetales{order}(94);Nocardioidaceae{family}(94);Nocardioides{genus}(94);uncultured_Actinomyces_sp.{species}(94)	Bacteria	Actinobacteria	Actinobacteria	Actinomycetales	Nocardioidaceae	Nocardioides	uncultured_Actinomyces_sp.
ASV1213	59	0	56	0	0	58	105	0	147	0	0	58	53	0	59	0	118	713	Bacteria{superkingdom}(91);Actinobacteria{phylum}(91);Actinobacteria{class}(91);Actinomycetales{order}(91);Nocardioidaceae{family}(91);Marmoricola{genus}(91);Unassigned{species}(0)	Bacteria	Actinobacteria	Actinobacteria	Actinomycetales	Nocardioidaceae	Marmoricola	Unassigned
ASV1214	0	33	0	0	0	0	0	0	0	0	0	0	0	0	0	0	0	33	Bacteria{superkingdom}(86);Bacteroidetes{phylum}(86);Sphingobacteriia{class}(86);Sphingobacteriales{order}(86);Chitinophagaceae{family}(86);Niastella{genus}(86);Unassigned{species}(0)	Bacteria	Bacteroidetes	Sphingobacteriia	Sphingobacteriales	Chitinophagaceae	Niastella	Unassigned
ASV1215	50	27	0	8	0	0	0	0	0	0	5	65	0	0	7	87	0	249	Bacteria{superkingdom}(100);Actinobacteria{phylum}(100);Actinobacteria{class}(100);Actinomycetales{order}(100);Nocardioidaceae{family}(100);Nocardioides{genus}(100);Unassigned{species}(0)	Bacteria	Actinobacteria	Actinobacteria	Actinomycetales	Nocardioidaceae	Nocardioides	Unassigned
ASV1216	72	51	48	33	0	37	48	18	0	0	33	0	30	0	0	18	0	388	Bacteria{superkingdom}(100);{phylum}(100);{class}(100);{order}(100);{family}(100);{genus}(100);uncultured_Syntrophobacterales_bacterium{species}(100)	Bacteria						uncultured_Syntrophobacterales_bacterium
ASV1217	39	0	118	0	0	8	325	10	4	64	20	15	18	22	0	36	23	702	Bacteria{superkingdom}(100);Planctomycetes{phylum}(100);Planctomycetia{class}(100);Planctomycetales{order}(100);Planctomycetaceae{family}(100);Pirellula{genus}(100);Unassigned{species}(0)	Bacteria	Planctomycetes	Planctomycetia	Planctomycetales	Planctomycetaceae	Pirellula	Unassigned
ASV1218	0	0	0	56	0	59	0	0	0	0	0	0	0	72	0	89	40	316	Bacteria{superkingdom}(96);Chloroflexi{phylum}(96);{class}(96);{order}(96);{family}(96);{genus}(96);uncultured_Firmicutes_bacterium{species}(96)	Bacteria	Chloroflexi					uncultured_Firmicutes_bacterium
ASV1219	22	31	81	0	33	0	83	42	102	31	16	0	0	0	0	0	0	441	Bacteria{superkingdom}(100);Acidobacteria{phylum}(100);Acidobacteria_Gp6{class}(100);{order}(100);{family}(100);Gp6{genus}(100);Unassigned{species}(0)	Bacteria	Acidobacteria	Acidobacteria_Gp6			Gp6	Unassigned
ASV1221	46	0	0	0	0	13	0	0	0	0	0	0	0	0	0	0	0	59	Bacteria{superkingdom}(97);Proteobacteria{phylum}(97);Alphaproteobacteria{class}(97);Rhizobiales{order}(97);Phyllobacteriaceae{family}(97);Mesorhizobium{genus}(97);Unassigned{species}(0)	Bacteria	Proteobacteria	Alphaproteobacteria	Rhizobiales	Phyllobacteriaceae	Mesorhizobium	Unassigned
ASV1222	25	21	22	15	11	23	36	99	104	138	13	49	6	13	11	0	0	586	Bacteria{superkingdom}(91);Chloroflexi{phylum}(91);{class}(91);{order}(91);{family}(91);{genus}(91);uncultured_Sphaerobacter_sp.{species}(91)	Bacteria	Chloroflexi					uncultured_Sphaerobacter_sp.
ASV1223	6	26	36	19	25	51	44	28	10	25	0	0	43	0	0	45	0	358	Bacteria{superkingdom}(100);Proteobacteria{phylum}(100);Alphaproteobacteria{class}(100);Rhizobiales{order}(100);Rhodobiaceae{family}(100);Unassigned{genus}(0);Unassigned{species}(0)	Bacteria	Proteobacteria	Alphaproteobacteria	Rhizobiales	Rhodobiaceae	Unassigned	Unassigned
ASV1224	0	82	0	0	0	0	0	39	0	0	20	37	25	120	46	51	0	420	Bacteria{superkingdom}(100);Actinobacteria{phylum}(100);Unassigned{class}(0);Unassigned{order}(0);Unassigned{family}(0);Unassigned{genus}(0);Unassigned{species}(0)	Bacteria	Actinobacteria	Unassigned	Unassigned	Unassigned	Unassigned	Unassigned
ASV1225	0	0	0	0	0	29	17	0	0	0	0	0	39	0	0	0	0	85	Bacteria{superkingdom}(97);Chloroflexi{phylum}(97);{class}(97);{order}(97);{family}(97);{genus}(97);uncultured_sludge_bacterium_H8{species}(97)	Bacteria	Chloroflexi					uncultured_sludge_bacterium_H8
ASV1226	13	0	0	0	0	0	0	0	0	0	0	0	0	15	17	62	0	107	Bacteria{superkingdom}(100);Bacteroidetes{phylum}(100);Sphingobacteriia{class}(100);Sphingobacteriales{order}(100);Chitinophagaceae{family}(100);{genus}(100);Unassigned{species}(0)	Bacteria	Bacteroidetes	Sphingobacteriia	Sphingobacteriales	Chitinophagaceae		Unassigned
ASV1227	0	0	0	0	0	0	0	0	0	0	0	13	0	48	29	62	0	152	Bacteria{superkingdom}(99);Proteobacteria{phylum}(99);Alphaproteobacteria{class}(99);Rhizobiales{order}(99);Methylobacteriaceae{family}(99);Microvirga{genus}(99);Unassigned{species}(0)	Bacteria	Proteobacteria	Alphaproteobacteria	Rhizobiales	Methylobacteriaceae	Microvirga	Unassigned
ASV1229	0	0	19	47	0	21	44	54	0	23	40	21	72	29	0	0	52	422	Bacteria{superkingdom}(100);Proteobacteria{phylum}(100);Gammaproteobacteria{class}(100);Xanthomonadales{order}(100);Sinobacteraceae{family}(100);Fontimonas{genus}(100);uncultured_bacterium{species}(100)	Bacteria	Proteobacteria	Gammaproteobacteria	Xanthomonadales	Sinobacteraceae	Fontimonas	uncultured_bacterium
ASV1230	26	0	56	49	0	27	68	14	0	29	28	28	39	19	0	0	50	433	Bacteria{superkingdom}(98);Actinobacteria{phylum}(98);Actinobacteria{class}(98);Acidimicrobiales{order}(98);{family}(98);{genus}(98);Unassigned{species}(0)	Bacteria	Actinobacteria	Actinobacteria	Acidimicrobiales			Unassigned
ASV1231	10	0	50	13	33	70	0	0	0	0	0	14	0	0	0	0	10	200	Bacteria{superkingdom}(100);candidate_division_WPS-1{phylum}(100);{class}(100);{order}(100);{family}(100);WPS-1_genera_incertae_sedis{genus}(100);Unassigned{species}(0)	Bacteria	candidate_division_WPS-1				WPS-1_genera_incertae_sedis	Unassigned
ASV1232	91	0	89	38	81	27	0	0	0	0	0	0	15	0	0	9	0	350	Bacteria{superkingdom}(100);Planctomycetes{phylum}(100);Planctomycetia{class}(100);Planctomycetales{order}(100);Planctomycetaceae{family}(100);{genus}(100);Planctomycete_enrichment_culture_clone_Ac-C5{species}(100)	Bacteria	Planctomycetes	Planctomycetia	Planctomycetales	Planctomycetaceae		Planctomycete_enrichment_culture_clone_Ac-C5
ASV1233	0	0	0	0	10	0	0	0	0	0	0	0	0	0	0	0	0	10	Bacteria{superkingdom}(98);Proteobacteria{phylum}(98);Alphaproteobacteria{class}(98);Rhizobiales{order}(98);Phyllobacteriaceae{family}(98);Mesorhizobium{genus}(98);Unassigned{species}(0)	Bacteria	Proteobacteria	Alphaproteobacteria	Rhizobiales	Phyllobacteriaceae	Mesorhizobium	Unassigned
ASV1234	19	0	29	0	9	0	23	0	6	0	0	0	0	0	0	0	0	86	Bacteria{superkingdom}(86);Actinobacteria{phylum}(86);Actinobacteria{class}(86);Acidimicrobiales{order}(86);{family}(86);{genus}(86);uncultured_organism{species}(86)	Bacteria	Actinobacteria	Actinobacteria	Acidimicrobiales			uncultured_organism
ASV1235	15	17	39	0	29	29	304	26	23	0	22	0	0	0	0	0	58	562	Bacteria{superkingdom}(99);Actinobacteria{phylum}(99);Actinobacteria{class}(99);Acidimicrobiales{order}(99);Acidimicrobineae_incertae_sedis{family}(99);Aciditerrimonas{genus}(99);Unassigned{species}(0)	Bacteria	Actinobacteria	Actinobacteria	Acidimicrobiales	Acidimicrobineae_incertae_sedis	Aciditerrimonas	Unassigned
ASV1236	15	0	74	0	40	38	19	50	0	0	17	0	56	0	0	0	40	349	Bacteria{superkingdom}(100);Acidobacteria{phylum}(100);Acidobacteria_Gp4{class}(100);{order}(100);{family}(100);Unassigned{genus}(0);Unassigned{species}(0)	Bacteria	Acidobacteria	Acidobacteria_Gp4			Unassigned	Unassigned
ASV1239	0	154	86	0	0	69	112	50	100	84	0	0	0	0	0	0	0	655	Bacteria{superkingdom}(100);Gemmatimonadetes{phylum}(100);Gemmatimonadetes{class}(100);Gemmatimonadales{order}(100);Gemmatimonadaceae{family}(100);Gemmatimonas{genus}(100);Unassigned{species}(0)	Bacteria	Gemmatimonadetes	Gemmatimonadetes	Gemmatimonadales	Gemmatimonadaceae	Gemmatimonas	Unassigned
ASV1240	63	16	22	23	55	22	0	0	0	20	0	0	26	0	0	22	19	288	Bacteria{superkingdom}(99);Planctomycetes{phylum}(99);Planctomycetia{class}(99);Planctomycetales{order}(99);Planctomycetaceae{family}(99);{genus}(99);uncultured_Planctomyces_sp.{species}(99)	Bacteria	Planctomycetes	Planctomycetia	Planctomycetales	Planctomycetaceae		uncultured_Planctomyces_sp.
ASV1241	15	0	14	0	76	0	0	0	60	0	0	64	6	0	61	16	0	312	Bacteria{superkingdom}(100);Bacteroidetes{phylum}(100);Sphingobacteriia{class}(100);Sphingobacteriales{order}(100);Chitinophagaceae{family}(100);{genus}(100);agricultural_soil_bacterium_SC-I-64{species}(100)	Bacteria	Bacteroidetes	Sphingobacteriia	Sphingobacteriales	Chitinophagaceae		agricultural_soil_bacterium_SC-I-64
ASV1242	0	0	0	18	0	0	0	0	0	0	0	0	0	0	0	0	0	18	Bacteria{superkingdom}(99);Proteobacteria{phylum}(99);Gammaproteobacteria{class}(99);{order}(99);{family}(99);{genus}(99);Unassigned{species}(0)	Bacteria	Proteobacteria	Gammaproteobacteria				Unassigned
ASV1243	76	14	150	0	17	71	25	0	0	0	0	0	0	0	0	0	0	353	Bacteria{superkingdom}(85);Acidobacteria{phylum}(85);Acidobacteria_Gp25{class}(85);{order}(85);{family}(85);Gp25{genus}(85);uncultured_Syntrophobacter_sp.{species}(85)	Bacteria	Acidobacteria	Acidobacteria_Gp25			Gp25	uncultured_Syntrophobacter_sp.
ASV1244	150	0	48	0	0	67	0	0	0	0	0	0	0	0	0	0	0	265	Bacteria{superkingdom}(100);Armatimonadetes{phylum}(100);{class}(100);{order}(100);{family}(100);Armatimonadetes_gp4{genus}(100);uncultured_candidate_division_OP10_bacterium{species}(100)	Bacteria	Armatimonadetes				Armatimonadetes_gp4	uncultured_candidate_division_OP10_bacterium
ASV1245	111	28	124	64	51	0	0	0	0	0	0	0	0	0	0	0	0	378	Bacteria{superkingdom}(94);Firmicutes{phylum}(94);Bacilli{class}(94);Bacillales{order}(94);Bacillaceae_1{family}(94);Bacillus{genus}(94);Unassigned{species}(0)	Bacteria	Firmicutes	Bacilli	Bacillales	Bacillaceae_1	Bacillus	Unassigned
ASV1246	0	48	0	0	0	0	0	0	0	0	0	46	0	0	21	0	0	115	Bacteria{superkingdom}(100);Acidobacteria{phylum}(100);Acidobacteria_Gp4{class}(100);{order}(100);{family}(100);Unassigned{genus}(0);Unassigned{species}(0)	Bacteria	Acidobacteria	Acidobacteria_Gp4			Unassigned	Unassigned
ASV1247	0	0	0	0	0	27	0	21	36	0	10	0	0	0	0	12	0	106	Bacteria{superkingdom}(100);Unassigned{phylum}(0);Unassigned{class}(0);Unassigned{order}(0);Unassigned{family}(0);Unassigned{genus}(0);Unassigned{species}(0)	Bacteria	Unassigned	Unassigned	Unassigned	Unassigned	Unassigned	Unassigned
ASV1248	25	0	15	0	0	0	49	418	18	115	0	56	0	0	0	70	0	766	Bacteria{superkingdom}(100);Actinobacteria{phylum}(100);Unassigned{class}(0);Unassigned{order}(0);Unassigned{family}(0);Unassigned{genus}(0);Unassigned{species}(0)	Bacteria	Actinobacteria	Unassigned	Unassigned	Unassigned	Unassigned	Unassigned
ASV1249	0	86	20	0	7	0	259	19	21	9	0	48	0	0	0	0	0	469	Bacteria{superkingdom}(88);Actinobacteria{phylum}(88);Actinobacteria{class}(88);Acidimicrobiales{order}(88);Acidimicrobineae_incertae_sedis{family}(88);Aciditerrimonas{genus}(88);Unassigned{species}(0)	Bacteria	Actinobacteria	Actinobacteria	Acidimicrobiales	Acidimicrobineae_incertae_sedis	Aciditerrimonas	Unassigned
ASV1250	20	0	0	41	0	22	61	0	0	0	0	0	0	0	0	0	0	144	Bacteria{superkingdom}(100);Acidobacteria{phylum}(100);Acidobacteria_Gp7{class}(100);{order}(100);{family}(100);Gp7{genus}(100);Unassigned{species}(0)	Bacteria	Acidobacteria	Acidobacteria_Gp7			Gp7	Unassigned
ASV1251	0	16	0	34	0	0	0	0	0	0	0	0	0	0	0	45	0	95	Bacteria{superkingdom}(100);Actinobacteria{phylum}(100);Actinobacteria{class}(100);Actinomycetales{order}(100);Nocardioidaceae{family}(100);Kribbella{genus}(100);Unassigned{species}(0)	Bacteria	Actinobacteria	Actinobacteria	Actinomycetales	Nocardioidaceae	Kribbella	Unassigned
ASV1252	0	0	0	0	0	0	0	0	0	0	0	0	0	0	0	11	0	11	Bacteria{superkingdom}(100);Proteobacteria{phylum}(100);Gammaproteobacteria{class}(100);Unassigned{order}(0);Unassigned{family}(0);Unassigned{genus}(0);Unassigned{species}(0)	Bacteria	Proteobacteria	Gammaproteobacteria	Unassigned	Unassigned	Unassigned	Unassigned
ASV1253	0	172	23	0	27	0	0	0	0	0	0	0	0	0	0	0	0	222	Bacteria{superkingdom}(84);Actinobacteria{phylum}(84);Actinobacteria{class}(84);Solirubrobacterales{order}(84);Unassigned{family}(0);Unassigned{genus}(0);Unassigned{species}(0)	Bacteria	Actinobacteria	Actinobacteria	Solirubrobacterales	Unassigned	Unassigned	Unassigned
ASV1254	26	0	0	0	0	0	0	0	0	0	0	0	0	0	0	0	0	26	Bacteria{superkingdom}(100);Actinobacteria{phylum}(100);Actinobacteria{class}(100);Actinomycetales{order}(100);Micromonosporaceae{family}(100);Unassigned{genus}(0);Unassigned{species}(0)	Bacteria	Actinobacteria	Actinobacteria	Actinomycetales	Micromonosporaceae	Unassigned	Unassigned
ASV1255	21	0	0	10	15	47	0	0	0	0	0	0	0	0	0	0	0	93	Bacteria{superkingdom}(100);Actinobacteria{phylum}(100);Actinobacteria{class}(100);Gaiellales{order}(100);Gaiellaceae{family}(100);Gaiella{genus}(100);Unassigned{species}(0)	Bacteria	Actinobacteria	Actinobacteria	Gaiellales	Gaiellaceae	Gaiella	Unassigned
ASV1256	149	0	41	42	31	0	0	0	0	24	0	44	0	0	0	0	0	331	Bacteria{superkingdom}(91);Proteobacteria{phylum}(91);Betaproteobacteria{class}(91);Burkholderiales{order}(91);Oxalobacteraceae{family}(91);Massilia{genus}(91);Unassigned{species}(0)	Bacteria	Proteobacteria	Betaproteobacteria	Burkholderiales	Oxalobacteraceae	Massilia	Unassigned
ASV1257	0	18	0	0	0	0	0	0	0	0	0	18	0	44	0	47	0	127	Bacteria{superkingdom}(100);Actinobacteria{phylum}(100);Actinobacteria{class}(100);Actinomycetales{order}(100);Pseudonocardiaceae{family}(100);Actinomycetospora{genus}(100);Unassigned{species}(0)	Bacteria	Actinobacteria	Actinobacteria	Actinomycetales	Pseudonocardiaceae	Actinomycetospora	Unassigned
ASV1258	103	45	28	0	117	28	0	0	88	0	0	0	0	0	30	0	0	439	Bacteria{superkingdom}(100);Proteobacteria{phylum}(100);Deltaproteobacteria{class}(100);{order}(100);{family}(100);{genus}(100);uncultured_Syntrophobacterales_bacterium{species}(100)	Bacteria	Proteobacteria	Deltaproteobacteria				uncultured_Syntrophobacterales_bacterium
ASV1259	60	0	123	192	40	51	0	0	0	0	0	0	58	23	0	0	0	547	Bacteria{superkingdom}(100);Planctomycetes{phylum}(100);Planctomycetia{class}(100);Planctomycetales{order}(100);Planctomycetaceae{family}(100);{genus}(100);Planctomycete_enrichment_culture_clone_Ac-C5{species}(100)	Bacteria	Planctomycetes	Planctomycetia	Planctomycetales	Planctomycetaceae		Planctomycete_enrichment_culture_clone_Ac-C5
ASV1260	10	0	0	0	0	0	0	0	0	49	0	22	0	44	0	73	0	198	Bacteria{superkingdom}(100);Actinobacteria{phylum}(100);Actinobacteria{class}(100);Actinomycetales{order}(100);Pseudonocardiaceae{family}(100);Pseudonocardia{genus}(100);Unassigned{species}(0)	Bacteria	Actinobacteria	Actinobacteria	Actinomycetales	Pseudonocardiaceae	Pseudonocardia	Unassigned
ASV1261	0	0	20	0	0	23	8	5	59	17	22	10	34	24	9	0	39	270	Bacteria{superkingdom}(98);Proteobacteria{phylum}(98);Betaproteobacteria{class}(98);{order}(98);{family}(98);{genus}(98);Unassigned{species}(0)	Bacteria	Proteobacteria	Betaproteobacteria				Unassigned
ASV1262	18	0	12	12	29	0	293	41	140	30	215	0	0	0	0	0	18	808	Bacteria{superkingdom}(84);Chloroflexi{phylum}(84);Anaerolineae{class}(84);Anaerolineales{order}(84);Anaerolineaceae{family}(84);{genus}(84);Unassigned{species}(0)	Bacteria	Chloroflexi	Anaerolineae	Anaerolineales	Anaerolineaceae		Unassigned
ASV1263	0	31	0	0	6	0	31	11	42	18	0	69	0	0	0	0	0	208	Bacteria{superkingdom}(80);Proteobacteria{phylum}(80);Betaproteobacteria{class}(80);Burkholderiales{order}(80);Burkholderiaceae{family}(80);Lautropia{genus}(80);uncultured_Derxia_sp.{species}(80)	Bacteria	Proteobacteria	Betaproteobacteria	Burkholderiales	Burkholderiaceae	Lautropia	uncultured_Derxia_sp.
ASV1264	0	0	63	148	65	114	37	7	17	14	9	0	0	0	24	0	0	498	Bacteria{superkingdom}(100);Firmicutes{phylum}(100);Bacilli{class}(100);Bacillales{order}(100);Paenibacillaceae_1{family}(100);Paenibacillus{genus}(100);Unassigned{species}(0)	Bacteria	Firmicutes	Bacilli	Bacillales	Paenibacillaceae_1	Paenibacillus	Unassigned
ASV1265	21	0	84	0	13	9	60	15	9	0	15	41	0	0	98	0	0	365	Bacteria{superkingdom}(85);Actinobacteria{phylum}(85);Actinobacteria{class}(85);Gaiellales{order}(85);Gaiellaceae{family}(85);Gaiella{genus}(85);uncultured_actinobacterium{species}(85)	Bacteria	Actinobacteria	Actinobacteria	Gaiellales	Gaiellaceae	Gaiella	uncultured_actinobacterium
ASV1267	11	0	14	43	27	31	16	4	0	0	0	19	0	0	0	0	0	165	Bacteria{superkingdom}(89);Chloroflexi{phylum}(89);Anaerolineae{class}(89);Anaerolineales{order}(89);Anaerolineaceae{family}(89);{genus}(89);Unassigned{species}(0)	Bacteria	Chloroflexi	Anaerolineae	Anaerolineales	Anaerolineaceae		Unassigned
ASV1268	0	22	0	0	0	0	0	0	11	9	0	0	0	0	0	23	0	65	Bacteria{superkingdom}(84);Bacteroidetes{phylum}(84);Sphingobacteriia{class}(84);Sphingobacteriales{order}(84);Chitinophagaceae{family}(84);Flavisolibacter{genus}(84);Unassigned{species}(0)	Bacteria	Bacteroidetes	Sphingobacteriia	Sphingobacteriales	Chitinophagaceae	Flavisolibacter	Unassigned
ASV1269	0	244	0	0	0	0	0	0	0	0	0	0	0	0	0	0	0	244	Bacteria{superkingdom}(97);Acidobacteria{phylum}(97);Acidobacteria_Gp6{class}(97);{order}(97);{family}(97);Gp6{genus}(97);Unassigned{species}(0)	Bacteria	Acidobacteria	Acidobacteria_Gp6			Gp6	Unassigned
ASV1270	0	155	0	0	0	0	97	0	0	0	50	0	494	0	0	0	64	860	Bacteria{superkingdom}(90);Actinobacteria{phylum}(90);Actinobacteria{class}(90);Solirubrobacterales{order}(90);{family}(90);{genus}(90);Unassigned{species}(0)	Bacteria	Actinobacteria	Actinobacteria	Solirubrobacterales			Unassigned
ASV1271	0	83	0	0	0	0	0	0	0	0	0	0	0	0	0	0	0	83	Bacteria{superkingdom}(100);Proteobacteria{phylum}(100);Betaproteobacteria{class}(100);{order}(100);{family}(100);{genus}(100);Unassigned{species}(0)	Bacteria	Proteobacteria	Betaproteobacteria				Unassigned
ASV1272	40	0	66	0	0	0	91	162	167	0	0	88	0	0	0	0	131	745	Bacteria{superkingdom}(100);Actinobacteria{phylum}(100);Actinobacteria{class}(100);Solirubrobacterales{order}(100);Unassigned{family}(0);Unassigned{genus}(0);Unassigned{species}(0)	Bacteria	Actinobacteria	Actinobacteria	Solirubrobacterales	Unassigned	Unassigned	Unassigned
ASV1273	32	0	0	0	23	13	0	0	4	0	0	0	0	0	0	0	0	72	Bacteria{superkingdom}(98);Chloroflexi{phylum}(98);Anaerolineae{class}(98);Anaerolineales{order}(98);Anaerolineaceae{family}(98);{genus}(98);Unassigned{species}(0)	Bacteria	Chloroflexi	Anaerolineae	Anaerolineales	Anaerolineaceae		Unassigned
ASV1274	0	0	30	29	0	0	0	27	28	58	0	45	77	0	27	0	42	363	Bacteria{superkingdom}(100);{phylum}(100);{class}(100);{order}(100);{family}(100);{genus}(100);uncultured_Actinomyces_sp.{species}(100)	Bacteria						uncultured_Actinomyces_sp.
ASV1275	0	46	19	0	37	0	0	0	0	0	0	0	0	0	0	0	53	155	Bacteria{superkingdom}(100);Bacteroidetes{phylum}(100);Cytophagia{class}(100);Cytophagales{order}(100);{family}(100);Ohtaekwangia{genus}(100);Unassigned{species}(0)	Bacteria	Bacteroidetes	Cytophagia	Cytophagales		Ohtaekwangia	Unassigned
ASV1276	37	13	63	35	24	33	0	0	0	0	0	0	0	0	0	0	0	205	Bacteria{superkingdom}(93);Planctomycetes{phylum}(93);Planctomycetia{class}(93);Planctomycetales{order}(93);Planctomycetaceae{family}(93);Blastopirellula{genus}(93);uncultured_bacterium{species}(93)	Bacteria	Planctomycetes	Planctomycetia	Planctomycetales	Planctomycetaceae	Blastopirellula	uncultured_bacterium
ASV1278	0	28	0	0	0	0	0	0	0	24	0	0	0	0	0	6	0	58	Bacteria{superkingdom}(100);Actinobacteria{phylum}(100);Actinobacteria{class}(100);Actinomycetales{order}(100);Pseudonocardiaceae{family}(100);Pseudonocardia{genus}(100);Unassigned{species}(0)	Bacteria	Actinobacteria	Actinobacteria	Actinomycetales	Pseudonocardiaceae	Pseudonocardia	Unassigned
ASV1281	57	0	8	0	9	10	0	0	7	0	0	0	0	0	0	0	0	91	Bacteria{superkingdom}(99);{phylum}(99);{class}(99);{order}(99);{family}(99);{genus}(99);uncultured_Gemmatimonadetes_bacterium{species}(99)	Bacteria						uncultured_Gemmatimonadetes_bacterium
ASV1282	73	0	0	0	0	59	0	0	0	0	7	0	0	0	0	0	0	139	Bacteria{superkingdom}(100);Bacteroidetes{phylum}(100);Sphingobacteriia{class}(100);Sphingobacteriales{order}(100);Chitinophagaceae{family}(100);Unassigned{genus}(0);Unassigned{species}(0)	Bacteria	Bacteroidetes	Sphingobacteriia	Sphingobacteriales	Chitinophagaceae	Unassigned	Unassigned
ASV1283	57	0	28	0	51	0	0	0	45	0	0	0	0	0	0	0	0	181	Bacteria{superkingdom}(100);Planctomycetes{phylum}(100);Planctomycetia{class}(100);Planctomycetales{order}(100);Planctomycetaceae{family}(100);Unassigned{genus}(0);Unassigned{species}(0)	Bacteria	Planctomycetes	Planctomycetia	Planctomycetales	Planctomycetaceae	Unassigned	Unassigned
ASV1284	10	0	0	25	0	14	0	0	0	0	0	0	0	13	9	9	0	80	Bacteria{superkingdom}(100);Chloroflexi{phylum}(100);Anaerolineae{class}(100);Anaerolineales{order}(100);Anaerolineaceae{family}(100);{genus}(100);unidentified_marine_bacterioplankton{species}(100)	Bacteria	Chloroflexi	Anaerolineae	Anaerolineales	Anaerolineaceae		unidentified_marine_bacterioplankton
ASV1285	19	79	15	0	0	0	149	69	0	0	26	0	0	0	61	43	98	559	Bacteria{superkingdom}(97);Actinobacteria{phylum}(97);Actinobacteria{class}(97);Acidimicrobiales{order}(97);Acidimicrobineae_incertae_sedis{family}(97);Aciditerrimonas{genus}(97);Unassigned{species}(0)	Bacteria	Actinobacteria	Actinobacteria	Acidimicrobiales	Acidimicrobineae_incertae_sedis	Aciditerrimonas	Unassigned
ASV1286	0	292	56	0	0	0	438	74	267	190	0	0	0	0	0	0	0	1317	Bacteria{superkingdom}(100);{phylum}(100);{class}(100);{order}(100);{family}(100);{genus}(100);uncultured_Syntrophobacterales_bacterium{species}(100)	Bacteria						uncultured_Syntrophobacterales_bacterium
ASV1287	0	0	14	0	0	0	0	0	0	17	0	0	0	6	0	12	19	68	Bacteria{superkingdom}(96);Candidatus_Saccharibacteria{phylum}(96);{class}(96);{order}(96);{family}(96);Saccharibacteria_genera_incertae_sedis{genus}(96);uncultured_candidate_division_TM7_bacterium{species}(96)	Bacteria	Candidatus_Saccharibacteria				Saccharibacteria_genera_incertae_sedis	uncultured_candidate_division_TM7_bacterium
ASV1288	34	0	55	0	12	30	0	0	0	0	0	0	0	0	0	0	0	131	Bacteria{superkingdom}(90);Acidobacteria{phylum}(90);Acidobacteria_Gp16{class}(90);{order}(90);{family}(90);Gp16{genus}(90);uncultured_Chloroflexi_bacterium{species}(90)	Bacteria	Acidobacteria	Acidobacteria_Gp16			Gp16	uncultured_Chloroflexi_bacterium
ASV1289	31	354	35	30	24	19	16	49	10	16	37	16	72	7	0	0	25	741	Bacteria{superkingdom}(94);Proteobacteria{phylum}(94);Deltaproteobacteria{class}(94);Myxococcales{order}(94);Cystobacteraceae{family}(94);{genus}(94);uncultured_delta_proteobacterium{species}(94)	Bacteria	Proteobacteria	Deltaproteobacteria	Myxococcales	Cystobacteraceae		uncultured_delta_proteobacterium
ASV1290	23	0	15	0	20	79	20	9	0	0	0	0	20	0	0	0	0	186	Bacteria{superkingdom}(100);Proteobacteria{phylum}(100);Deltaproteobacteria{class}(100);Myxococcales{order}(100);Polyangiaceae{family}(100);{genus}(100);uncultured_Myxococcales_bacterium{species}(100)	Bacteria	Proteobacteria	Deltaproteobacteria	Myxococcales	Polyangiaceae		uncultured_Myxococcales_bacterium
ASV1291	18	0	31	70	47	89	0	0	0	0	0	0	0	0	0	0	0	255	Bacteria{superkingdom}(91);Planctomycetes{phylum}(91);Phycisphaerae{class}(91);{order}(91);{family}(91);{genus}(91);uncultured_Planctomycetales_bacterium_HF0500_02G17{species}(91)	Bacteria	Planctomycetes	Phycisphaerae				uncultured_Planctomycetales_bacterium_HF0500_02G17
ASV1292	32	0	28	6	20	25	0	0	0	0	0	0	0	25	0	24	0	160	Bacteria{superkingdom}(90);Chloroflexi{phylum}(90);Thermomicrobia{class}(90);Sphaerobacterales{order}(90);Sphaerobacteraceae{family}(90);{genus}(90);Unassigned{species}(0)	Bacteria	Chloroflexi	Thermomicrobia	Sphaerobacterales	Sphaerobacteraceae		Unassigned
ASV1293	23	10	26	14	11	0	52	189	50	155	12	79	28	37	0	40	144	870	Bacteria{superkingdom}(99);Chloroflexi{phylum}(99);Chloroflexia{class}(99);{order}(99);{family}(99);{genus}(99);uncultured_bacterium{species}(99)	Bacteria	Chloroflexi	Chloroflexia				uncultured_bacterium
ASV1295	26	22	102	7	30	22	133	61	107	30	7	0	0	0	0	0	15	562	Bacteria{superkingdom}(96);Acidobacteria{phylum}(96);Acidobacteria_Gp3{class}(96);{order}(96);{family}(96);Gp3{genus}(96);uncultured_Candidatus_Solibacter_sp.{species}(96)	Bacteria	Acidobacteria	Acidobacteria_Gp3			Gp3	uncultured_Candidatus_Solibacter_sp.
ASV1296	0	197	0	0	0	0	0	0	0	0	11	0	0	0	0	0	81	289	Bacteria{superkingdom}(81);Actinobacteria{phylum}(81);Actinobacteria{class}(81);Acidimicrobiales{order}(81);Iamiaceae{family}(81);{genus}(81);Unassigned{species}(0)	Bacteria	Actinobacteria	Actinobacteria	Acidimicrobiales	Iamiaceae		Unassigned
ASV1297	16	0	33	17	25	0	20	0	40	21	0	13	17	40	33	20	46	341	Bacteria{superkingdom}(89);Proteobacteria{phylum}(89);Alphaproteobacteria{class}(89);Rhizobiales{order}(89);Hyphomicrobiaceae{family}(89);Prosthecomicrobium{genus}(89);uncultured_alpha_proteobacterium{species}(89)	Bacteria	Proteobacteria	Alphaproteobacteria	Rhizobiales	Hyphomicrobiaceae	Prosthecomicrobium	uncultured_alpha_proteobacterium
ASV1298	42	0	67	13	60	83	43	39	22	0	14	51	98	50	0	0	81	663	Bacteria{superkingdom}(94);Proteobacteria{phylum}(94);Alphaproteobacteria{class}(94);Sphingomonadales{order}(94);Sphingomonadaceae{family}(94);Sphingomonas{genus}(94);Unassigned{species}(0)	Bacteria	Proteobacteria	Alphaproteobacteria	Sphingomonadales	Sphingomonadaceae	Sphingomonas	Unassigned
ASV1299	0	0	8	0	0	0	0	0	0	0	0	0	0	0	0	30	0	38	Bacteria{superkingdom}(100);{phylum}(100);{class}(100);{order}(100);{family}(100);{genus}(100);uncultured_Gemmatimonadetes_bacterium{species}(100)	Bacteria						uncultured_Gemmatimonadetes_bacterium
ASV1300	0	0	0	11	0	0	0	0	0	0	0	0	0	72	23	32	0	138	Bacteria{superkingdom}(100);Bacteroidetes{phylum}(100);Cytophagia{class}(100);Cytophagales{order}(100);{family}(100);Ohtaekwangia{genus}(100);Unassigned{species}(0)	Bacteria	Bacteroidetes	Cytophagia	Cytophagales		Ohtaekwangia	Unassigned
ASV1301	0	0	0	0	0	31	57	0	0	80	0	0	0	0	0	0	82	250	Bacteria{superkingdom}(95);Proteobacteria{phylum}(95);Deltaproteobacteria{class}(95);Myxococcales{order}(95);{family}(95);{genus}(95);Unassigned{species}(0)	Bacteria	Proteobacteria	Deltaproteobacteria	Myxococcales			Unassigned
ASV1302	43	59	74	5	63	24	0	64	75	13	0	15	0	0	0	0	0	435	Bacteria{superkingdom}(99);Chloroflexi{phylum}(99);Chloroflexia{class}(99);{order}(99);{family}(99);{genus}(99);uncultured_bacterium{species}(99)	Bacteria	Chloroflexi	Chloroflexia				uncultured_bacterium
ASV1303	0	0	0	0	0	0	0	0	0	0	0	0	0	0	0	0	7	7	Bacteria{superkingdom}(100);Acidobacteria{phylum}(100);Acidobacteria_Gp6{class}(100);{order}(100);{family}(100);Gp6{genus}(100);Unassigned{species}(0)	Bacteria	Acidobacteria	Acidobacteria_Gp6			Gp6	Unassigned
ASV1304	0	0	0	0	0	0	43	35	0	54	0	0	0	0	0	0	0	132	Bacteria{superkingdom}(100);Proteobacteria{phylum}(100);Gammaproteobacteria{class}(100);Unassigned{order}(0);Unassigned{family}(0);Unassigned{genus}(0);Unassigned{species}(0)	Bacteria	Proteobacteria	Gammaproteobacteria	Unassigned	Unassigned	Unassigned	Unassigned
ASV1305	0	60	0	0	0	0	0	10	25	59	19	0	0	0	0	0	0	173	Bacteria{superkingdom}(89);Actinobacteria{phylum}(89);Actinobacteria{class}(89);Acidimicrobiales{order}(89);Acidimicrobineae_incertae_sedis{family}(89);Aciditerrimonas{genus}(89);uncultured_bacterium{species}(89)	Bacteria	Actinobacteria	Actinobacteria	Acidimicrobiales	Acidimicrobineae_incertae_sedis	Aciditerrimonas	uncultured_bacterium
ASV1306	0	0	0	6	0	0	20	0	0	0	0	0	11	0	1	17	14	69	Bacteria{superkingdom}(84);Bacteroidetes{phylum}(84);Cytophagia{class}(84);Cytophagales{order}(84);Cytophagaceae{family}(84);Dyadobacter{genus}(84);Dyadobacter_fermentans{species}(84)	Bacteria	Bacteroidetes	Cytophagia	Cytophagales	Cytophagaceae	Dyadobacter	Dyadobacter_fermentans
ASV1308	67	0	11	105	0	65	0	0	0	0	0	0	0	0	0	0	0	248	Bacteria{superkingdom}(88);Proteobacteria{phylum}(88);Gammaproteobacteria{class}(88);Xanthomonadales{order}(88);Sinobacteraceae{family}(88);Povalibacter{genus}(88);uncultured_bacterium{species}(88)	Bacteria	Proteobacteria	Gammaproteobacteria	Xanthomonadales	Sinobacteraceae	Povalibacter	uncultured_bacterium
ASV1309	29	0	0	35	24	22	21	17	16	44	0	40	197	0	0	19	22	486	Bacteria{superkingdom}(83);Acidobacteria{phylum}(83);Acidobacteria_Gp3{class}(83);{order}(83);{family}(83);Gp3{genus}(83);Unassigned{species}(0)	Bacteria	Acidobacteria	Acidobacteria_Gp3			Gp3	Unassigned
ASV1310	0	0	0	15	0	0	0	52	34	54	0	155	0	0	0	0	0	310	Bacteria{superkingdom}(87);Actinobacteria{phylum}(87);Actinobacteria{class}(87);Unassigned{order}(0);Unassigned{family}(0);Unassigned{genus}(0);Unassigned{species}(0)	Bacteria	Actinobacteria	Actinobacteria	Unassigned	Unassigned	Unassigned	Unassigned
ASV1312	40	20	55	28	27	37	17	36	36	21	0	21	9	28	0	0	59	434	Bacteria{superkingdom}(95);Proteobacteria{phylum}(95);Alphaproteobacteria{class}(95);Rhodospirillales{order}(95);Rhodospirillaceae{family}(95);{genus}(95);uncultured_Nitrobacter_sp.{species}(95)	Bacteria	Proteobacteria	Alphaproteobacteria	Rhodospirillales	Rhodospirillaceae		uncultured_Nitrobacter_sp.
ASV1313	0	0	0	11	0	0	0	0	0	0	0	0	0	0	0	0	0	11	Bacteria{superkingdom}(100);Actinobacteria{phylum}(100);Actinobacteria{class}(100);Actinomycetales{order}(100);Promicromonosporaceae{family}(100);Promicromonospora{genus}(100);Unassigned{species}(0)	Bacteria	Actinobacteria	Actinobacteria	Actinomycetales	Promicromonosporaceae	Promicromonospora	Unassigned
ASV1314	0	0	42	0	19	26	0	0	0	0	0	0	0	0	127	0	0	214	Bacteria{superkingdom}(82);Proteobacteria{phylum}(82);Deltaproteobacteria{class}(82);Myxococcales{order}(82);Polyangiaceae{family}(82);Byssovorax{genus}(82);uncultured_bacterium{species}(82)	Bacteria	Proteobacteria	Deltaproteobacteria	Myxococcales	Polyangiaceae	Byssovorax	uncultured_bacterium
ASV1315	0	41	12	0	0	0	24	27	116	67	0	30	34	223	153	28	66	821	Bacteria{superkingdom}(100);Bacteroidetes{phylum}(100);Sphingobacteriia{class}(100);Sphingobacteriales{order}(100);Chitinophagaceae{family}(100);Unassigned{genus}(0);Unassigned{species}(0)	Bacteria	Bacteroidetes	Sphingobacteriia	Sphingobacteriales	Chitinophagaceae	Unassigned	Unassigned
ASV1316	0	0	0	16	9	0	0	75	37	189	0	50	45	98	210	10	89	828	Bacteria{superkingdom}(90);Actinobacteria{phylum}(90);Actinobacteria{class}(90);{order}(90);{family}(90);{genus}(90);uncultured_Frankia_sp.{species}(90)	Bacteria	Actinobacteria	Actinobacteria				uncultured_Frankia_sp.
ASV1317	13	0	34	0	0	0	118	92	104	59	0	54	0	0	0	0	54	528	Bacteria{superkingdom}(88);Actinobacteria{phylum}(88);Actinobacteria{class}(88);Actinomycetales{order}(88);Propionibacteriaceae{family}(88);Microlunatus{genus}(88);Unassigned{species}(0)	Bacteria	Actinobacteria	Actinobacteria	Actinomycetales	Propionibacteriaceae	Microlunatus	Unassigned
ASV1318	0	22	0	0	0	0	0	0	0	0	0	0	0	0	0	0	0	22	Bacteria{superkingdom}(87);Proteobacteria{phylum}(87);Alphaproteobacteria{class}(87);Rhizobiales{order}(87);Rhizobiales_incertae_sedis{family}(87);Variibacter{genus}(87);Unassigned{species}(0)	Bacteria	Proteobacteria	Alphaproteobacteria	Rhizobiales	Rhizobiales_incertae_sedis	Variibacter	Unassigned
ASV1319	62	0	40	0	25	29	34	27	0	0	0	0	0	0	24	0	0	241	Bacteria{superkingdom}(100);Actinobacteria{phylum}(100);Actinobacteria{class}(100);Gaiellales{order}(100);Gaiellaceae{family}(100);Gaiella{genus}(100);Unassigned{species}(0)	Bacteria	Actinobacteria	Actinobacteria	Gaiellales	Gaiellaceae	Gaiella	Unassigned
ASV1320	98	6	40	0	26	40	0	0	0	0	0	0	0	0	0	0	0	210	Bacteria{superkingdom}(100);Acidobacteria{phylum}(100);Acidobacteria_Gp6{class}(100);{order}(100);{family}(100);Gp6{genus}(100);Unassigned{species}(0)	Bacteria	Acidobacteria	Acidobacteria_Gp6			Gp6	Unassigned
ASV1321	0	0	56	0	0	0	0	0	0	0	0	0	0	0	0	0	0	56	Bacteria{superkingdom}(100);Acidobacteria{phylum}(100);Acidobacteria_Gp6{class}(100);{order}(100);{family}(100);Gp6{genus}(100);Unassigned{species}(0)	Bacteria	Acidobacteria	Acidobacteria_Gp6			Gp6	Unassigned
ASV1322	26	0	27	32	35	25	24	11	18	0	0	0	0	0	0	0	0	198	Bacteria{superkingdom}(89);Proteobacteria{phylum}(89);Alphaproteobacteria{class}(89);Rhizobiales{order}(89);{family}(89);{genus}(89);Unassigned{species}(0)	Bacteria	Proteobacteria	Alphaproteobacteria	Rhizobiales			Unassigned
ASV1323	24	0	0	0	10	0	13	0	74	58	0	0	0	0	0	0	0	179	Bacteria{superkingdom}(97);Chloroflexi{phylum}(97);Anaerolineae{class}(97);Anaerolineales{order}(97);Anaerolineaceae{family}(97);{genus}(97);uncultured_Gemmatimonadetes_bacterium{species}(97)	Bacteria	Chloroflexi	Anaerolineae	Anaerolineales	Anaerolineaceae		uncultured_Gemmatimonadetes_bacterium
ASV1325	54	0	39	0	21	27	34	98	56	0	0	0	0	0	0	0	0	329	Bacteria{superkingdom}(84);Proteobacteria{phylum}(84);Alphaproteobacteria{class}(84);Rhizobiales{order}(84);Rhodobiaceae{family}(84);{genus}(84);Unassigned{species}(0)	Bacteria	Proteobacteria	Alphaproteobacteria	Rhizobiales	Rhodobiaceae		Unassigned
ASV1326	17	0	0	43	11	0	134	0	44	50	40	0	144	43	0	0	0	526	Bacteria{superkingdom}(98);Proteobacteria{phylum}(98);Deltaproteobacteria{class}(98);{order}(98);{family}(98);{genus}(98);Unassigned{species}(0)	Bacteria	Proteobacteria	Deltaproteobacteria				Unassigned
ASV1327	25	0	0	0	0	16	0	0	0	0	0	0	0	0	0	0	0	41	Bacteria{superkingdom}(100);Proteobacteria{phylum}(100);Deltaproteobacteria{class}(100);Myxococcales{order}(100);Sandaracinaceae{family}(100);Sandaracinus{genus}(100);delta_proteobacterium_WY32{species}(100)	Bacteria	Proteobacteria	Deltaproteobacteria	Myxococcales	Sandaracinaceae	Sandaracinus	delta_proteobacterium_WY32
ASV1328	0	0	0	0	0	0	5	0	217	71	121	0	0	0	0	0	0	414	Bacteria{superkingdom}(100);Bacteroidetes{phylum}(100);Sphingobacteriia{class}(100);Sphingobacteriales{order}(100);Chitinophagaceae{family}(100);Unassigned{genus}(0);Unassigned{species}(0)	Bacteria	Bacteroidetes	Sphingobacteriia	Sphingobacteriales	Chitinophagaceae	Unassigned	Unassigned
ASV1329	0	0	0	0	8	7	0	0	0	0	0	0	0	0	0	0	0	15	Bacteria{superkingdom}(91);Candidatus_Saccharibacteria{phylum}(91);{class}(91);{order}(91);{family}(91);Saccharibacteria_genera_incertae_sedis{genus}(91);uncultured_bacterium{species}(91)	Bacteria	Candidatus_Saccharibacteria				Saccharibacteria_genera_incertae_sedis	uncultured_bacterium
ASV1330	30	63	29	37	22	5	0	0	0	33	7	27	0	26	19	20	11	329	Bacteria{superkingdom}(100);candidate_division_WPS-1{phylum}(100);{class}(100);{order}(100);{family}(100);WPS-1_genera_incertae_sedis{genus}(100);Unassigned{species}(0)	Bacteria	candidate_division_WPS-1				WPS-1_genera_incertae_sedis	Unassigned
ASV1331	35	100	23	18	0	18	0	4	0	0	0	0	0	0	0	0	0	198	Bacteria{superkingdom}(100);{phylum}(100);{class}(100);{order}(100);{family}(100);{genus}(100);Unassigned{species}(0)	Bacteria						Unassigned
ASV1332	24	0	0	0	0	26	0	0	0	0	0	0	0	0	0	0	14	64	Bacteria{superkingdom}(100);Chloroflexi{phylum}(100);{class}(100);{order}(100);{family}(100);{genus}(100);uncultured_sludge_bacterium_S14{species}(100)	Bacteria	Chloroflexi					uncultured_sludge_bacterium_S14
ASV1333	29	0	58	0	0	36	43	0	0	0	0	0	0	0	0	0	0	166	Bacteria{superkingdom}(100);Planctomycetes{phylum}(100);Planctomycetia{class}(100);Planctomycetales{order}(100);Planctomycetaceae{family}(100);Unassigned{genus}(0);Unassigned{species}(0)	Bacteria	Planctomycetes	Planctomycetia	Planctomycetales	Planctomycetaceae	Unassigned	Unassigned
ASV1334	0	0	0	0	0	0	9	0	0	0	0	0	0	0	0	0	0	9	Bacteria{superkingdom}(100);Chloroflexi{phylum}(100);{class}(100);{order}(100);{family}(100);{genus}(100);uncultured_sludge_bacterium_S14{species}(100)	Bacteria	Chloroflexi					uncultured_sludge_bacterium_S14
ASV1335	0	0	0	0	0	0	0	0	0	0	0	0	0	0	8	0	0	8	Bacteria{superkingdom}(91);Chloroflexi{phylum}(91);Chloroflexia{class}(91);Chloroflexales{order}(91);Unassigned{family}(0);Unassigned{genus}(0);Unassigned{species}(0)	Bacteria	Chloroflexi	Chloroflexia	Chloroflexales	Unassigned	Unassigned	Unassigned
ASV1336	0	0	0	0	0	0	461	0	346	0	0	0	0	0	0	0	0	807	Bacteria{superkingdom}(80);Planctomycetes{phylum}(80);Planctomycetia{class}(80);Planctomycetales{order}(80);Planctomycetaceae{family}(80);{genus}(80);Unassigned{species}(0)	Bacteria	Planctomycetes	Planctomycetia	Planctomycetales	Planctomycetaceae		Unassigned
ASV1338	9	0	0	36	99	25	0	0	0	0	0	0	0	0	0	0	72	241	Bacteria{superkingdom}(86);Proteobacteria{phylum}(86);Alphaproteobacteria{class}(86);Sphingomonadales{order}(86);Sphingomonadaceae{family}(86);Sphingomonas{genus}(86);Unassigned{species}(0)	Bacteria	Proteobacteria	Alphaproteobacteria	Sphingomonadales	Sphingomonadaceae	Sphingomonas	Unassigned
ASV1340	32	41	56	33	0	24	10	0	0	0	0	0	0	0	0	45	0	241	Bacteria{superkingdom}(100);candidate_division_WPS-1{phylum}(100);{class}(100);{order}(100);{family}(100);WPS-1_genera_incertae_sedis{genus}(100);Unassigned{species}(0)	Bacteria	candidate_division_WPS-1				WPS-1_genera_incertae_sedis	Unassigned
ASV1342	0	0	0	0	0	0	0	71	100	83	0	39	485	92	0	0	137	1007	Bacteria{superkingdom}(100);Actinobacteria{phylum}(100);Actinobacteria{class}(100);{order}(100);{family}(100);{genus}(100);Unassigned{species}(0)	Bacteria	Actinobacteria	Actinobacteria				Unassigned
[truncated: 18,269 more rows]
