# Supplementary material for: Years of sand fixation with Caragana korshinskii drive the enrichment of its rhizosphere functional microbes by accumulating soil N
Source: PeerJ journal article supplement (doi:10.7717/peerj.14271), 2022-11-01
Supplement: ASV_of_bacteria_in_summer.xlsx [file ASV_of_bacteria_in_summer.xlsx]

## Sheet: otu
#ASV ID	Ck18-1	Ck18-2	Ck18-3	Ck18-4	Ck18-5	Ck12-1	Ck12-2	Ck12-3	Ck12-4	Ck12-5	Ck6-1	Ck6-2	Ck6-3	Ck6-4	Ck6-5	ASVsize	Taxonomy	superkingdom	phylum	class	order	family	genus	species
ASV1	2557	931	3475	2047	1102	1160	1705	3008	3393	4293	3961	2620	3557	3023	2702	39534	Bacteria{superkingdom}(97);Actinobacteria{phylum}(97);Actinobacteria{class}(97);Actinomycetales{order}(97);Micrococcaceae{family}(97);Arthrobacter{genus}(97);Unassigned{species}(0)	Bacteria	Actinobacteria	Actinobacteria	Actinomycetales	Micrococcaceae	Arthrobacter	Unassigned
ASV2	2040	642	1314	1496	1049	1628	1266	4126	2130	3750	180	1056	705	2344	2384	26110	Bacteria{superkingdom}(97);Actinobacteria{phylum}(97);Actinobacteria{class}(97);Actinomycetales{order}(97);Micrococcaceae{family}(97);Arthrobacter{genus}(97);Unassigned{species}(0)	Bacteria	Actinobacteria	Actinobacteria	Actinomycetales	Micrococcaceae	Arthrobacter	Unassigned
ASV4	145	461	175	150	99	201	200	157	394	623	1260	1635	847	586	235	7168	Bacteria{superkingdom}(92);Actinobacteria{phylum}(92);Actinobacteria{class}(92);Solirubrobacterales{order}(92);{family}(92);{genus}(92);Unassigned{species}(0)	Bacteria	Actinobacteria	Actinobacteria	Solirubrobacterales			Unassigned
ASV5	1142	1297	1569	2454	765	649	244	213	553	275	1478	1912	51	2129	3202	17933	Bacteria{superkingdom}(100);Actinobacteria{phylum}(100);Actinobacteria{class}(100);Actinomycetales{order}(100);Streptomycetaceae{family}(100);Streptomyces{genus}(100);Unassigned{species}(0)	Bacteria	Actinobacteria	Actinobacteria	Actinomycetales	Streptomycetaceae	Streptomyces	Unassigned
ASV7	47	343	30	107	92	37	33	206	125	175	80	739	1118	363	1609	5104	Bacteria{superkingdom}(100);Acidobacteria{phylum}(100);Acidobacteria_Gp4{class}(100);{order}(100);{family}(100);Gp4{genus}(100);Unassigned{species}(0)	Bacteria	Acidobacteria	Acidobacteria_Gp4			Gp4	Unassigned
ASV8	991	459	1101	2103	799	36	142	179	641	66	118	734	60	1347	73	8849	Bacteria{superkingdom}(100);Actinobacteria{phylum}(100);Actinobacteria{class}(100);Actinomycetales{order}(100);Nocardioidaceae{family}(100);Kribbella{genus}(100);Unassigned{species}(0)	Bacteria	Actinobacteria	Actinobacteria	Actinomycetales	Nocardioidaceae	Kribbella	Unassigned
ASV9	6	15	14	9	19	9	0	0	10	137	7	0	0	12	8	246	Bacteria{superkingdom}(84);Chloroflexi{phylum}(84);{class}(84);{order}(84);{family}(84);{genus}(84);uncultured_Sphaerobacter_sp.{species}(84)	Bacteria	Chloroflexi					uncultured_Sphaerobacter_sp.
ASV11	1770	1312	2251	719	1081	558	1095	921	2176	699	427	646	1799	184	737	16375	Bacteria{superkingdom}(88);Chloroflexi{phylum}(88);Anaerolineae{class}(88);Anaerolineales{order}(88);Anaerolineaceae{family}(88);{genus}(88);uncultured_soil_bacterium{species}(88)	Bacteria	Chloroflexi	Anaerolineae	Anaerolineales	Anaerolineaceae		uncultured_soil_bacterium
ASV12	0	21	0	66	0	0	39	60	52	150	12	606	182	686	152	2026	Bacteria{superkingdom}(100);Proteobacteria{phylum}(100);Alphaproteobacteria{class}(100);Rhizobiales{order}(100);Methylobacteriaceae{family}(100);Microvirga{genus}(100);Unassigned{species}(0)	Bacteria	Proteobacteria	Alphaproteobacteria	Rhizobiales	Methylobacteriaceae	Microvirga	Unassigned
ASV13	0	0	0	67	81	0	40	167	445	389	191	601	0	0	0	1981	Bacteria{superkingdom}(100);Actinobacteria{phylum}(100);Actinobacteria{class}(100);{order}(100);{family}(100);{genus}(100);uncultured_Actinomycetales_bacterium{species}(100)	Bacteria	Actinobacteria	Actinobacteria				uncultured_Actinomycetales_bacterium
ASV14	0	0	0	373	64	177	0	1003	536	496	148	535	1184	945	0	5461	Bacteria{superkingdom}(97);Actinobacteria{phylum}(97);Actinobacteria{class}(97);Actinomycetales{order}(97);Micrococcaceae{family}(97);Arthrobacter{genus}(97);Unassigned{species}(0)	Bacteria	Actinobacteria	Actinobacteria	Actinomycetales	Micrococcaceae	Arthrobacter	Unassigned
ASV15	32	153	39	36	36	259	219	415	110	255	78	502	600	626	422	3782	Bacteria{superkingdom}(94);Proteobacteria{phylum}(94);Alphaproteobacteria{class}(94);Rhizobiales{order}(94);Methylobacteriaceae{family}(94);Microvirga{genus}(94);Unassigned{species}(0)	Bacteria	Proteobacteria	Alphaproteobacteria	Rhizobiales	Methylobacteriaceae	Microvirga	Unassigned
ASV16	0	0	0	39	40	0	0	0	0	0	0	0	0	0	0	79	Bacteria{superkingdom}(99);Actinobacteria{phylum}(99);Actinobacteria{class}(99);Actinomycetales{order}(99);Streptomycetaceae{family}(99);Streptomyces{genus}(99);Unassigned{species}(0)	Bacteria	Actinobacteria	Actinobacteria	Actinomycetales	Streptomycetaceae	Streptomyces	Unassigned
ASV17	1381	380	1896	3705	2570	27	183	114	64	148	0	0	0	0	0	10468	Bacteria{superkingdom}(99);Actinobacteria{phylum}(99);Actinobacteria{class}(99);Actinomycetales{order}(99);Streptomycetaceae{family}(99);Streptomyces{genus}(99);Unassigned{species}(0)	Bacteria	Actinobacteria	Actinobacteria	Actinomycetales	Streptomycetaceae	Streptomyces	Unassigned
ASV18	1052	56	986	1082	490	220	322	822	332	731	231	784	1420	792	519	9839	Bacteria{superkingdom}(100);Actinobacteria{phylum}(100);Actinobacteria{class}(100);Actinomycetales{order}(100);Microbacteriaceae{family}(100);Agromyces{genus}(100);Unassigned{species}(0)	Bacteria	Actinobacteria	Actinobacteria	Actinomycetales	Microbacteriaceae	Agromyces	Unassigned
ASV19	544	772	258	452	199	128	127	610	310	505	301	2156	957	1499	215	9033	Bacteria{superkingdom}(99);Actinobacteria{phylum}(99);Actinobacteria{class}(99);Actinomycetales{order}(99);Nocardioidaceae{family}(99);Aeromicrobium{genus}(99);Unassigned{species}(0)	Bacteria	Actinobacteria	Actinobacteria	Actinomycetales	Nocardioidaceae	Aeromicrobium	Unassigned
ASV20	635	1482	60	294	97	349	230	582	89	444	0	143	41	1776	187	6409	Bacteria{superkingdom}(99);Chloroflexi{phylum}(99);Anaerolineae{class}(99);Anaerolineales{order}(99);Anaerolineaceae{family}(99);{genus}(99);uncultured_soil_bacterium{species}(99)	Bacteria	Chloroflexi	Anaerolineae	Anaerolineales	Anaerolineaceae		uncultured_soil_bacterium
ASV21	286	121	142	317	402	0	0	147	282	0	896	15	0	32	66	2706	Bacteria{superkingdom}(100);Acidobacteria{phylum}(100);Acidobacteria_Gp4{class}(100);{order}(100);{family}(100);Gp4{genus}(100);Unassigned{species}(0)	Bacteria	Acidobacteria	Acidobacteria_Gp4			Gp4	Unassigned
ASV22	261	275	188	958	236	57	171	91	196	243	188	190	443	222	212	3931	Bacteria{superkingdom}(83);Actinobacteria{phylum}(83);Actinobacteria{class}(83);Actinomycetales{order}(83);Pseudonocardiaceae{family}(83);Lechevalieria{genus}(83);Unassigned{species}(0)	Bacteria	Actinobacteria	Actinobacteria	Actinomycetales	Pseudonocardiaceae	Lechevalieria	Unassigned
ASV23	347	289	386	235	142	223	129	219	564	183	219	371	225	163	163	3858	Bacteria{superkingdom}(100);Proteobacteria{phylum}(100);Betaproteobacteria{class}(100);Burkholderiales{order}(100);Burkholderiaceae{family}(100);Ralstonia{genus}(100);Unassigned{species}(0)	Bacteria	Proteobacteria	Betaproteobacteria	Burkholderiales	Burkholderiaceae	Ralstonia	Unassigned
ASV24	242	1647	1269	409	720	231	135	0	331	37	2283	39	43	26	76	7488	Bacteria{superkingdom}(100);Proteobacteria{phylum}(100);Alphaproteobacteria{class}(100);Rhizobiales{order}(100);Phyllobacteriaceae{family}(100);Mesorhizobium{genus}(100);Unassigned{species}(0)	Bacteria	Proteobacteria	Alphaproteobacteria	Rhizobiales	Phyllobacteriaceae	Mesorhizobium	Unassigned
ASV25	12	24	0	45	22	0	0	23	19	245	0	82	52	0	20	544	Bacteria{superkingdom}(99);Proteobacteria{phylum}(99);Betaproteobacteria{class}(99);Burkholderiales{order}(99);Oxalobacteraceae{family}(99);Massilia{genus}(99);Unassigned{species}(0)	Bacteria	Proteobacteria	Betaproteobacteria	Burkholderiales	Oxalobacteraceae	Massilia	Unassigned
ASV26	43	837	25	0	55	2059	360	465	36	588	0	81	67	1288	199	6103	Bacteria{superkingdom}(100);Acidobacteria{phylum}(100);Acidobacteria_Gp4{class}(100);{order}(100);{family}(100);Gp4{genus}(100);uncultured_Candidatus_Chloracidobacterium_sp.{species}(100)	Bacteria	Acidobacteria	Acidobacteria_Gp4			Gp4	uncultured_Candidatus_Chloracidobacterium_sp.
ASV27	82	40	99	1001	322	332	412	1350	270	361	190	595	1099	785	79	7017	Bacteria{superkingdom}(100);Nitrospirae{phylum}(100);Nitrospira{class}(100);Nitrospirales{order}(100);Nitrospiraceae{family}(100);Nitrospira{genus}(100);Unassigned{species}(0)	Bacteria	Nitrospirae	Nitrospira	Nitrospirales	Nitrospiraceae	Nitrospira	Unassigned
ASV28	353	58	130	363	144	121	106	342	74	276	184	592	248	362	535	3888	Bacteria{superkingdom}(100);Proteobacteria{phylum}(100);Alphaproteobacteria{class}(100);Rhizobiales{order}(100);Methylobacteriaceae{family}(100);Microvirga{genus}(100);Unassigned{species}(0)	Bacteria	Proteobacteria	Alphaproteobacteria	Rhizobiales	Methylobacteriaceae	Microvirga	Unassigned
ASV29	3	3	4	4	0	0	0	0	4	5	4	0	4	5	0	36	Bacteria{superkingdom}(100);Cyanobacteria/Chloroplast{phylum}(100);Cyanobacteria{class}(100);{order}(100);Unassigned{family}(0);Unassigned{genus}(0);Unassigned{species}(0)	Bacteria	Cyanobacteria/Chloroplast	Cyanobacteria		Unassigned	Unassigned	Unassigned
ASV30	1051	0	671	1804	692	10	66	109	196	0	201	178	289	285	18	5570	Bacteria{superkingdom}(100);Actinobacteria{phylum}(100);Actinobacteria{class}(100);Actinomycetales{order}(100);Pseudonocardiaceae{family}(100);Amycolatopsis{genus}(100);Unassigned{species}(0)	Bacteria	Actinobacteria	Actinobacteria	Actinomycetales	Pseudonocardiaceae	Amycolatopsis	Unassigned
ASV31	812	119	953	292	652	151	103	19	73	32	75	0	0	50	217	3548	Bacteria{superkingdom}(99);Proteobacteria{phylum}(99);Alphaproteobacteria{class}(99);Rhizobiales{order}(99);Rhizobiaceae{family}(99);Rhizobium{genus}(99);Unassigned{species}(0)	Bacteria	Proteobacteria	Alphaproteobacteria	Rhizobiales	Rhizobiaceae	Rhizobium	Unassigned
ASV32	80	101	93	216	73	31	0	286	27	61	0	0	23	43	0	1034	Bacteria{superkingdom}(100);Actinobacteria{phylum}(100);Actinobacteria{class}(100);Rubrobacterales{order}(100);Rubrobacteraceae{family}(100);Rubrobacter{genus}(100);Unassigned{species}(0)	Bacteria	Actinobacteria	Actinobacteria	Rubrobacterales	Rubrobacteraceae	Rubrobacter	Unassigned
ASV33	65	412	55	92	51	0	71	360	160	72	0	168	49	42	445	2042	Bacteria{superkingdom}(83);Acidobacteria{phylum}(83);Acidobacteria_Gp4{class}(83);{order}(83);{family}(83);Gp4{genus}(83);Acidobacterium_sp._Ac_12_G8{species}(83)	Bacteria	Acidobacteria	Acidobacteria_Gp4			Gp4	Acidobacterium_sp._Ac_12_G8
ASV34	199	37	282	270	442	202	253	225	289	686	277	404	1026	470	243	5305	Bacteria{superkingdom}(100);Actinobacteria{phylum}(100);Actinobacteria{class}(100);Actinomycetales{order}(100);Streptomycetaceae{family}(100);Streptomyces{genus}(100);Unassigned{species}(0)	Bacteria	Actinobacteria	Actinobacteria	Actinomycetales	Streptomycetaceae	Streptomyces	Unassigned
ASV35	289	396	316	569	490	171	161	132	121	240	464	142	70	508	263	4332	Bacteria{superkingdom}(97);Actinobacteria{phylum}(97);Actinobacteria{class}(97);Actinomycetales{order}(97);Mycobacteriaceae{family}(97);Mycobacterium{genus}(97);Unassigned{species}(0)	Bacteria	Actinobacteria	Actinobacteria	Actinomycetales	Mycobacteriaceae	Mycobacterium	Unassigned
ASV36	0	402	45	0	64	67	54	72	239	219	156	736	717	333	283	3387	Bacteria{superkingdom}(94);Actinobacteria{phylum}(94);Actinobacteria{class}(94);Acidimicrobiales{order}(94);{family}(94);{genus}(94);uncultured_Thermobifida_sp.{species}(94)	Bacteria	Actinobacteria	Actinobacteria	Acidimicrobiales			uncultured_Thermobifida_sp.
ASV38	234	371	149	336	254	666	263	771	239	809	94	404	0	261	566	5417	Bacteria{superkingdom}(97);Proteobacteria{phylum}(97);Alphaproteobacteria{class}(97);Rhizobiales{order}(97);Rhodobiaceae{family}(97);{genus}(97);Unassigned{species}(0)	Bacteria	Proteobacteria	Alphaproteobacteria	Rhizobiales	Rhodobiaceae		Unassigned
ASV39	544	108	869	931	843	41	204	148	115	152	154	216	314	199	282	5120	Bacteria{superkingdom}(100);Actinobacteria{phylum}(100);Actinobacteria{class}(100);Actinomycetales{order}(100);Microbacteriaceae{family}(100);Microbacterium{genus}(100);Unassigned{species}(0)	Bacteria	Actinobacteria	Actinobacteria	Actinomycetales	Microbacteriaceae	Microbacterium	Unassigned
ASV40	413	542	317	231	483	357	329	551	599	205	1852	162	380	208	419	7048	Bacteria{superkingdom}(97);Actinobacteria{phylum}(97);Actinobacteria{class}(97);Acidimicrobiales{order}(97);Acidimicrobineae_incertae_sedis{family}(97);Aciditerrimonas{genus}(97);uncultured_Acidimicrobiales_bacterium{species}(97)	Bacteria	Actinobacteria	Actinobacteria	Acidimicrobiales	Acidimicrobineae_incertae_sedis	Aciditerrimonas	uncultured_Acidimicrobiales_bacterium
ASV41	201	64	179	393	505	875	392	466	876	826	783	919	1268	492	753	8992	Bacteria{superkingdom}(99);Proteobacteria{phylum}(99);Alphaproteobacteria{class}(99);Rhizobiales{order}(99);Hyphomicrobiaceae{family}(99);Hyphomicrobium{genus}(99);Unassigned{species}(0)	Bacteria	Proteobacteria	Alphaproteobacteria	Rhizobiales	Hyphomicrobiaceae	Hyphomicrobium	Unassigned
ASV42	37	227	105	29	51	77	611	234	158	143	176	624	662	580	715	4429	Bacteria{superkingdom}(86);Bacteroidetes{phylum}(86);Sphingobacteriia{class}(86);Sphingobacteriales{order}(86);Chitinophagaceae{family}(86);{genus}(86);Unassigned{species}(0)	Bacteria	Bacteroidetes	Sphingobacteriia	Sphingobacteriales	Chitinophagaceae		Unassigned
ASV43	0	0	0	0	0	0	26	0	0	0	0	48	0	15	0	89	Bacteria{superkingdom}(99);Firmicutes{phylum}(99);Bacilli{class}(99);Bacillales{order}(99);Planococcaceae{family}(99);Unassigned{genus}(0);Unassigned{species}(0)	Bacteria	Firmicutes	Bacilli	Bacillales	Planococcaceae	Unassigned	Unassigned
ASV44	80	198	55	42	28	96	91	200	175	335	63	322	329	499	370	2883	Bacteria{superkingdom}(100);Actinobacteria{phylum}(100);Actinobacteria{class}(100);Actinomycetales{order}(100);Geodermatophilaceae{family}(100);Blastococcus{genus}(100);Unassigned{species}(0)	Bacteria	Actinobacteria	Actinobacteria	Actinomycetales	Geodermatophilaceae	Blastococcus	Unassigned
ASV45	60	13	0	60	18	24	23	83	91	189	0	535	245	518	32	1891	Bacteria{superkingdom}(88);Actinobacteria{phylum}(88);Actinobacteria{class}(88);Actinomycetales{order}(88);Pseudonocardiaceae{family}(88);Actinomycetospora{genus}(88);uncultured_bacterium{species}(88)	Bacteria	Actinobacteria	Actinobacteria	Actinomycetales	Pseudonocardiaceae	Actinomycetospora	uncultured_bacterium
ASV47	15	75	0	14	0	134	154	346	58	225	17	434	341	1017	109	2939	Bacteria{superkingdom}(100);{phylum}(100);{class}(100);{order}(100);{family}(100);{genus}(100);uncultured_candidate_division_WYO_bacterium{species}(100)	Bacteria						uncultured_candidate_division_WYO_bacterium
ASV48	99	367	90	122	40	48	61	330	130	232	0	51	58	25	32	1685	Bacteria{superkingdom}(99);Chloroflexi{phylum}(99);Thermomicrobia{class}(99);Sphaerobacterales{order}(99);Sphaerobacteraceae{family}(99);Unassigned{genus}(0);Unassigned{species}(0)	Bacteria	Chloroflexi	Thermomicrobia	Sphaerobacterales	Sphaerobacteraceae	Unassigned	Unassigned
ASV49	216	599	420	217	239	423	512	665	364	955	318	957	1626	704	1056	9271	Bacteria{superkingdom}(100);Acidobacteria{phylum}(100);Acidobacteria_Gp16{class}(100);{order}(100);{family}(100);Gp16{genus}(100);Unassigned{species}(0)	Bacteria	Acidobacteria	Acidobacteria_Gp16			Gp16	Unassigned
ASV50	0	61	0	336	0	60	173	201	127	830	75	706	631	794	432	4426	Bacteria{superkingdom}(97);Proteobacteria{phylum}(97);Alphaproteobacteria{class}(97);Rhizobiales{order}(97);Methylobacteriaceae{family}(97);Microvirga{genus}(97);Unassigned{species}(0)	Bacteria	Proteobacteria	Alphaproteobacteria	Rhizobiales	Methylobacteriaceae	Microvirga	Unassigned
ASV51	2982	220	2530	0	4349	387	0	347	71	0	0	0	0	0	0	10886	Bacteria{superkingdom}(100);Actinobacteria{phylum}(100);Actinobacteria{class}(100);Actinomycetales{order}(100);Streptomycetaceae{family}(100);Streptomyces{genus}(100);Unassigned{species}(0)	Bacteria	Actinobacteria	Actinobacteria	Actinomycetales	Streptomycetaceae	Streptomyces	Unassigned
ASV52	85	350	40	33	22	21	0	154	48	83	0	0	0	219	0	1055	Bacteria{superkingdom}(100);Proteobacteria{phylum}(100);Alphaproteobacteria{class}(100);Rhizobiales{order}(100);{family}(100);{genus}(100);uncultured_endolithic_bacterium{species}(100)	Bacteria	Proteobacteria	Alphaproteobacteria	Rhizobiales			uncultured_endolithic_bacterium
ASV53	133	98	240	63	221	842	579	1235	1038	255	0	0	0	0	0	4704	Bacteria{superkingdom}(100);Bacteroidetes{phylum}(100);Cytophagia{class}(100);Cytophagales{order}(100);Cytophagaceae{family}(100);Adhaeribacter{genus}(100);Unassigned{species}(0)	Bacteria	Bacteroidetes	Cytophagia	Cytophagales	Cytophagaceae	Adhaeribacter	Unassigned
ASV54	364	100	710	166	413	1399	1937	274	617	2178	566	14	68	99	1689	10594	Bacteria{superkingdom}(100);{phylum}(100);{class}(100);{order}(100);{family}(100);{genus}(100);uncultured_Actinomyces_sp.{species}(100)	Bacteria						uncultured_Actinomyces_sp.
ASV55	0	0	0	0	6	0	0	0	5	0	0	0	0	0	0	11	Bacteria{superkingdom}(94);Cyanobacteria/Chloroplast{phylum}(94);Cyanobacteria{class}(94);{order}(94);Family_I{family}(94);GpI{genus}(94);uncultured_Scytonema_sp.{species}(94)	Bacteria	Cyanobacteria/Chloroplast	Cyanobacteria		Family_I	GpI	uncultured_Scytonema_sp.
ASV56	0	336	0	7	24	456	120	249	0	296	0	0	0	0	0	1488	Bacteria{superkingdom}(100);Acidobacteria{phylum}(100);Acidobacteria_Gp4{class}(100);{order}(100);{family}(100);Gp4{genus}(100);Unassigned{species}(0)	Bacteria	Acidobacteria	Acidobacteria_Gp4			Gp4	Unassigned
ASV57	115	0	118	1429	288	0	0	15	20	0	0	33	0	15	0	2033	Bacteria{superkingdom}(100);Proteobacteria{phylum}(100);Gammaproteobacteria{class}(100);Xanthomonadales{order}(100);Xanthomonadaceae{family}(100);Pseudoxanthomonas{genus}(100);Unassigned{species}(0)	Bacteria	Proteobacteria	Gammaproteobacteria	Xanthomonadales	Xanthomonadaceae	Pseudoxanthomonas	Unassigned
ASV58	420	127	548	1000	418	100	111	93	98	362	142	158	214	117	127	4035	Bacteria{superkingdom}(100);Proteobacteria{phylum}(100);Alphaproteobacteria{class}(100);Rhizobiales{order}(100);Rhizobiaceae{family}(100);Ensifer{genus}(100);Unassigned{species}(0)	Bacteria	Proteobacteria	Alphaproteobacteria	Rhizobiales	Rhizobiaceae	Ensifer	Unassigned
ASV59	0	11	0	0	6	0	0	17	0	31	0	0	0	0	0	65	Bacteria{superkingdom}(100);Actinobacteria{phylum}(100);Actinobacteria{class}(100);Rubrobacterales{order}(100);Rubrobacteraceae{family}(100);Rubrobacter{genus}(100);Unassigned{species}(0)	Bacteria	Actinobacteria	Actinobacteria	Rubrobacterales	Rubrobacteraceae	Rubrobacter	Unassigned
ASV60	58	194	87	305	111	481	574	554	296	544	150	185	83	431	287	4340	Bacteria{superkingdom}(100);Acidobacteria{phylum}(100);Acidobacteria_Gp6{class}(100);{order}(100);{family}(100);Gp6{genus}(100);Unassigned{species}(0)	Bacteria	Acidobacteria	Acidobacteria_Gp6			Gp6	Unassigned
ASV61	161	0	62	164	33	96	191	941	113	156	0	51	9	27	0	2004	Bacteria{superkingdom}(100);Proteobacteria{phylum}(100);Gammaproteobacteria{class}(100);Unassigned{order}(0);Unassigned{family}(0);Unassigned{genus}(0);Unassigned{species}(0)	Bacteria	Proteobacteria	Gammaproteobacteria	Unassigned	Unassigned	Unassigned	Unassigned
ASV62	60	0	71	105	38	2298	5342	447	312	1206	317	34	0	0	458	10688	Bacteria{superkingdom}(100);Acidobacteria{phylum}(100);Acidobacteria_Gp4{class}(100);{order}(100);{family}(100);Gp4{genus}(100);Unassigned{species}(0)	Bacteria	Acidobacteria	Acidobacteria_Gp4			Gp4	Unassigned
ASV63	157	336	47	68	105	0	0	64	23	0	34	0	0	53	34	921	Bacteria{superkingdom}(85);Acidobacteria{phylum}(85);Acidobacteria_Gp4{class}(85);{order}(85);{family}(85);Gp4{genus}(85);uncultured_Rhodopseudomonas_sp.{species}(85)	Bacteria	Acidobacteria	Acidobacteria_Gp4			Gp4	uncultured_Rhodopseudomonas_sp.
ASV64	0	0	0	0	0	0	0	0	0	138	89	141	216	202	185	971	Bacteria{superkingdom}(89);Proteobacteria{phylum}(89);Alphaproteobacteria{class}(89);Rhizobiales{order}(89);Methylobacteriaceae{family}(89);Microvirga{genus}(89);Unassigned{species}(0)	Bacteria	Proteobacteria	Alphaproteobacteria	Rhizobiales	Methylobacteriaceae	Microvirga	Unassigned
ASV66	0	0	0	0	0	0	0	0	94	133	0	0	0	0	0	227	Bacteria{superkingdom}(100);Actinobacteria{phylum}(100);Actinobacteria{class}(100);Acidimicrobiales{order}(100);Unassigned{family}(0);Unassigned{genus}(0);Unassigned{species}(0)	Bacteria	Actinobacteria	Actinobacteria	Acidimicrobiales	Unassigned	Unassigned	Unassigned
ASV67	317	0	179	73	558	0	0	0	276	12	372	0	0	0	25	1812	Bacteria{superkingdom}(98);Acidobacteria{phylum}(98);Acidobacteria_Gp7{class}(98);{order}(98);{family}(98);Gp7{genus}(98);uncultured_Anaeromyxobacter_sp.{species}(98)	Bacteria	Acidobacteria	Acidobacteria_Gp7			Gp7	uncultured_Anaeromyxobacter_sp.
ASV68	34	300	19	31	34	0	331	184	17	66	0	68	0	14	21	1119	Bacteria{superkingdom}(96);Proteobacteria{phylum}(96);Alphaproteobacteria{class}(96);Rhizobiales{order}(96);{family}(96);{genus}(96);uncultured_endolithic_bacterium{species}(96)	Bacteria	Proteobacteria	Alphaproteobacteria	Rhizobiales			uncultured_endolithic_bacterium
ASV69	327	350	119	271	92	172	166	214	96	242	177	778	369	755	248	4376	Bacteria{superkingdom}(100);Actinobacteria{phylum}(100);Actinobacteria{class}(100);Actinomycetales{order}(100);Nocardioidaceae{family}(100);Nocardioides{genus}(100);Unassigned{species}(0)	Bacteria	Actinobacteria	Actinobacteria	Actinomycetales	Nocardioidaceae	Nocardioides	Unassigned
ASV70	441	0	75	691	25	1456	48	582	480	184	789	0	52	0	0	4823	Bacteria{superkingdom}(93);Firmicutes{phylum}(93);Bacilli{class}(93);Bacillales{order}(93);Bacillaceae_1{family}(93);Domibacillus{genus}(93);uncultured_bacterium{species}(93)	Bacteria	Firmicutes	Bacilli	Bacillales	Bacillaceae_1	Domibacillus	uncultured_bacterium
ASV71	104	103	131	82	0	71	135	299	234	285	106	100	384	146	150	2330	Bacteria{superkingdom}(99);Chloroflexi{phylum}(99);Anaerolineae{class}(99);Anaerolineales{order}(99);Anaerolineaceae{family}(99);{genus}(99);uncultured_soil_bacterium{species}(99)	Bacteria	Chloroflexi	Anaerolineae	Anaerolineales	Anaerolineaceae		uncultured_soil_bacterium
ASV72	170	366	483	251	146	320	357	693	382	245	429	74	474	203	256	4849	Bacteria{superkingdom}(99);Actinobacteria{phylum}(99);Actinobacteria{class}(99);Acidimicrobiales{order}(99);Acidimicrobineae_incertae_sedis{family}(99);Aciditerrimonas{genus}(99);uncultured_Acidimicrobiales_bacterium{species}(99)	Bacteria	Actinobacteria	Actinobacteria	Acidimicrobiales	Acidimicrobineae_incertae_sedis	Aciditerrimonas	uncultured_Acidimicrobiales_bacterium
ASV73	94	341	55	64	0	93	121	125	210	220	62	57	76	48	0	1566	Bacteria{superkingdom}(100);Actinobacteria{phylum}(100);Actinobacteria{class}(100);Acidimicrobiales{order}(100);Unassigned{family}(0);Unassigned{genus}(0);Unassigned{species}(0)	Bacteria	Actinobacteria	Actinobacteria	Acidimicrobiales	Unassigned	Unassigned	Unassigned
ASV74	840	0	137	1937	105	0	12	54	1240	269	0	0	0	0	0	4594	Bacteria{superkingdom}(99);Actinobacteria{phylum}(99);Actinobacteria{class}(99);Actinomycetales{order}(99);Streptomycetaceae{family}(99);Streptomyces{genus}(99);Unassigned{species}(0)	Bacteria	Actinobacteria	Actinobacteria	Actinomycetales	Streptomycetaceae	Streptomyces	Unassigned
ASV75	316	68	215	844	719	157	116	139	69	0	111	71	83	82	150	3140	Bacteria{superkingdom}(99);Proteobacteria{phylum}(99);Alphaproteobacteria{class}(99);Rhizobiales{order}(99);{family}(99);{genus}(99);Unassigned{species}(0)	Bacteria	Proteobacteria	Alphaproteobacteria	Rhizobiales			Unassigned
ASV76	9	66	94	14	22	26	0	30	22	96	0	94	121	74	0	668	Bacteria{superkingdom}(100);Proteobacteria{phylum}(100);Alphaproteobacteria{class}(100);Rhodobacterales{order}(100);Rhodobacteraceae{family}(100);Rubellimicrobium{genus}(100);Unassigned{species}(0)	Bacteria	Proteobacteria	Alphaproteobacteria	Rhodobacterales	Rhodobacteraceae	Rubellimicrobium	Unassigned
ASV77	782	402	435	128	447	724	356	213	169	233	24	16	0	142	141	4212	Bacteria{superkingdom}(84);Nitrospirae{phylum}(84);Nitrospira{class}(84);Nitrospirales{order}(84);Nitrospiraceae{family}(84);Nitrospira{genus}(84);uncultured_soil_bacterium{species}(84)	Bacteria	Nitrospirae	Nitrospira	Nitrospirales	Nitrospiraceae	Nitrospira	uncultured_soil_bacterium
ASV78	83	0	78	399	346	38	0	40	0	0	191	0	0	0	74	1249	Bacteria{superkingdom}(99);Proteobacteria{phylum}(99);Alphaproteobacteria{class}(99);Rhodospirillales{order}(99);Rhodospirillaceae{family}(99);Dongia{genus}(99);Unassigned{species}(0)	Bacteria	Proteobacteria	Alphaproteobacteria	Rhodospirillales	Rhodospirillaceae	Dongia	Unassigned
ASV79	1	18	4	81	11	139	109	161	488	251	199	613	1441	235	243	3994	Bacteria{superkingdom}(82);Actinobacteria{phylum}(82);Actinobacteria{class}(82);Acidimicrobiales{order}(82);Acidimicrobineae_incertae_sedis{family}(82);Aciditerrimonas{genus}(82);uncultured_Acidimicrobiales_bacterium{species}(82)	Bacteria	Actinobacteria	Actinobacteria	Acidimicrobiales	Acidimicrobineae_incertae_sedis	Aciditerrimonas	uncultured_Acidimicrobiales_bacterium
ASV80	441	0	384	489	265	318	65	166	1044	403	197	0	56	0	60	3888	Bacteria{superkingdom}(95);Firmicutes{phylum}(95);Bacilli{class}(95);Bacillales{order}(95);Bacillaceae_1{family}(95);Bacillus{genus}(95);Bacillus_funiculus{species}(95)	Bacteria	Firmicutes	Bacilli	Bacillales	Bacillaceae_1	Bacillus	Bacillus_funiculus
ASV81	0	74	0	0	0	0	0	0	0	157	0	0	46	0	0	277	Bacteria{superkingdom}(100);Actinobacteria{phylum}(100);Actinobacteria{class}(100);Solirubrobacterales{order}(100);Unassigned{family}(0);Unassigned{genus}(0);Unassigned{species}(0)	Bacteria	Actinobacteria	Actinobacteria	Solirubrobacterales	Unassigned	Unassigned	Unassigned
ASV82	0	0	0	45	0	0	30	155	27	326	0	147	119	329	114	1292	Bacteria{superkingdom}(100);Proteobacteria{phylum}(100);Alphaproteobacteria{class}(100);Rhizobiales{order}(100);Methylobacteriaceae{family}(100);Microvirga{genus}(100);Unassigned{species}(0)	Bacteria	Proteobacteria	Alphaproteobacteria	Rhizobiales	Methylobacteriaceae	Microvirga	Unassigned
ASV83	0	0	0	0	0	0	0	0	0	0	0	59	0	0	0	59	Bacteria{superkingdom}(97);Firmicutes{phylum}(97);Bacilli{class}(97);Bacillales{order}(97);Planococcaceae{family}(97);Unassigned{genus}(0);Unassigned{species}(0)	Bacteria	Firmicutes	Bacilli	Bacillales	Planococcaceae	Unassigned	Unassigned
ASV84	491	305	528	177	408	570	232	208	482	461	197	41	556	454	234	5344	Bacteria{superkingdom}(99);Chloroflexi{phylum}(99);Anaerolineae{class}(99);Anaerolineales{order}(99);Anaerolineaceae{family}(99);{genus}(99);uncultured_soil_bacterium{species}(99)	Bacteria	Chloroflexi	Anaerolineae	Anaerolineales	Anaerolineaceae		uncultured_soil_bacterium
ASV85	0	29	0	0	12	0	9	0	0	31	0	57	0	30	56	224	Bacteria{superkingdom}(100);Actinobacteria{phylum}(100);Actinobacteria{class}(100);Actinomycetales{order}(100);Unassigned{family}(0);Unassigned{genus}(0);Unassigned{species}(0)	Bacteria	Actinobacteria	Actinobacteria	Actinomycetales	Unassigned	Unassigned	Unassigned
ASV86	93	154	180	129	68	147	226	150	168	336	252	165	212	105	194	2579	Bacteria{superkingdom}(89);Actinobacteria{phylum}(89);Actinobacteria{class}(89);Actinomycetales{order}(89);Nocardioidaceae{family}(89);Marmoricola{genus}(89);Unassigned{species}(0)	Bacteria	Actinobacteria	Actinobacteria	Actinomycetales	Nocardioidaceae	Marmoricola	Unassigned
ASV87	0	0	0	0	0	0	0	0	0	76	0	29	0	27	0	132	Bacteria{superkingdom}(100);Bacteroidetes{phylum}(100);Cytophagia{class}(100);Cytophagales{order}(100);Cytophagaceae{family}(100);Adhaeribacter{genus}(100);Unassigned{species}(0)	Bacteria	Bacteroidetes	Cytophagia	Cytophagales	Cytophagaceae	Adhaeribacter	Unassigned
ASV88	0	0	0	0	0	0	0	59	0	0	0	0	0	0	0	59	Bacteria{superkingdom}(89);Acidobacteria{phylum}(89);Acidobacteria_Gp10{class}(89);{order}(89);{family}(89);Gp10{genus}(89);uncultured_Pelobacter_sp.{species}(89)	Bacteria	Acidobacteria	Acidobacteria_Gp10			Gp10	uncultured_Pelobacter_sp.
ASV89	112	485	160	173	37	193	83	247	121	249	169	267	0	34	122	2452	Bacteria{superkingdom}(100);Actinobacteria{phylum}(100);Actinobacteria{class}(100);Solirubrobacterales{order}(100);Unassigned{family}(0);Unassigned{genus}(0);Unassigned{species}(0)	Bacteria	Actinobacteria	Actinobacteria	Solirubrobacterales	Unassigned	Unassigned	Unassigned
ASV90	416	46	191	153	153	1059	597	186	1075	423	279	222	749	55	264	5868	Bacteria{superkingdom}(99);Chloroflexi{phylum}(99);Unassigned{class}(0);Unassigned{order}(0);Unassigned{family}(0);Unassigned{genus}(0);Unassigned{species}(0)	Bacteria	Chloroflexi	Unassigned	Unassigned	Unassigned	Unassigned	Unassigned
ASV91	3151	0	555	77	302	146	700	1193	3152	23	811	50	15	15	31	10221	Bacteria{superkingdom}(96);Firmicutes{phylum}(96);Bacilli{class}(96);Bacillales{order}(96);Bacillaceae_1{family}(96);Bacillus{genus}(96);Unassigned{species}(0)	Bacteria	Firmicutes	Bacilli	Bacillales	Bacillaceae_1	Bacillus	Unassigned
ASV92	96	127	572	124	270	172	241	212	550	280	593	489	936	537	417	5616	Bacteria{superkingdom}(98);Actinobacteria{phylum}(98);Actinobacteria{class}(98);Acidimicrobiales{order}(98);Acidimicrobineae_incertae_sedis{family}(98);Aciditerrimonas{genus}(98);uncultured_Acidimicrobiales_bacterium{species}(98)	Bacteria	Actinobacteria	Actinobacteria	Acidimicrobiales	Acidimicrobineae_incertae_sedis	Aciditerrimonas	uncultured_Acidimicrobiales_bacterium
ASV93	177	55	154	374	448	165	108	116	144	164	145	133	126	156	145	2610	Bacteria{superkingdom}(100);Acidobacteria{phylum}(100);Acidobacteria_Gp6{class}(100);{order}(100);{family}(100);Gp6{genus}(100);Unassigned{species}(0)	Bacteria	Acidobacteria	Acidobacteria_Gp6			Gp6	Unassigned
ASV94	634	0	625	694	732	0	37	34	43	0	8	53	50	30	26	2966	Bacteria{superkingdom}(100);Proteobacteria{phylum}(100);Betaproteobacteria{class}(100);Methylophilales{order}(100);Methylophilaceae{family}(100);Unassigned{genus}(0);Unassigned{species}(0)	Bacteria	Proteobacteria	Betaproteobacteria	Methylophilales	Methylophilaceae	Unassigned	Unassigned
ASV95	0	0	0	0	0	0	0	0	0	224	0	332	150	55	0	761	Bacteria{superkingdom}(100);Actinobacteria{phylum}(100);Actinobacteria{class}(100);Actinomycetales{order}(100);Streptomycetaceae{family}(100);Streptomyces{genus}(100);Unassigned{species}(0)	Bacteria	Actinobacteria	Actinobacteria	Actinomycetales	Streptomycetaceae	Streptomyces	Unassigned
ASV97	535	79	374	229	1159	172	403	372	485	147	189	106	288	63	300	4901	Bacteria{superkingdom}(100);Proteobacteria{phylum}(100);Gammaproteobacteria{class}(100);Xanthomonadales{order}(100);Sinobacteraceae{family}(100);Steroidobacter{genus}(100);Unassigned{species}(0)	Bacteria	Proteobacteria	Gammaproteobacteria	Xanthomonadales	Sinobacteraceae	Steroidobacter	Unassigned
ASV98	24	502	508	98	1671	0	0	70	18	9	0	11	0	107	0	3018	Bacteria{superkingdom}(86);Acidobacteria{phylum}(86);Acidobacteria_Gp10{class}(86);{order}(86);{family}(86);Gp10{genus}(86);uncultured_soil_bacterium{species}(86)	Bacteria	Acidobacteria	Acidobacteria_Gp10			Gp10	uncultured_soil_bacterium
ASV99	37	7	74	29	28	0	0	0	25	0	0	64	131	99	266	760	Bacteria{superkingdom}(87);Actinobacteria{phylum}(87);Actinobacteria{class}(87);Solirubrobacterales{order}(87);Solirubrobacteraceae{family}(87);Solirubrobacter{genus}(87);uncultured_bacterium{species}(87)	Bacteria	Actinobacteria	Actinobacteria	Solirubrobacterales	Solirubrobacteraceae	Solirubrobacter	uncultured_bacterium
ASV100	0	0	0	0	0	0	0	0	0	0	0	37	0	0	0	37	Bacteria{superkingdom}(97);Proteobacteria{phylum}(97);Alphaproteobacteria{class}(97);Rhodobacterales{order}(97);Rhodobacteraceae{family}(97);Rubellimicrobium{genus}(97);uncultured_bacterium{species}(97)	Bacteria	Proteobacteria	Alphaproteobacteria	Rhodobacterales	Rhodobacteraceae	Rubellimicrobium	uncultured_bacterium
ASV101	216	201	539	281	680	178	114	100	26	33	257	106	32	168	216	3147	Bacteria{superkingdom}(100);Proteobacteria{phylum}(100);Alphaproteobacteria{class}(100);Sphingomonadales{order}(100);Sphingomonadaceae{family}(100);Sphingomonas{genus}(100);Unassigned{species}(0)	Bacteria	Proteobacteria	Alphaproteobacteria	Sphingomonadales	Sphingomonadaceae	Sphingomonas	Unassigned
ASV102	186	133	105	183	198	60	119	271	209	139	0	0	21	0	55	1679	Bacteria{superkingdom}(100);Proteobacteria{phylum}(100);Deltaproteobacteria{class}(100);{order}(100);{family}(100);{genus}(100);Unassigned{species}(0)	Bacteria	Proteobacteria	Deltaproteobacteria				Unassigned
ASV103	0	0	40	0	708	0	0	0	16	0	0	0	0	0	29	793	Bacteria{superkingdom}(100);Bacteroidetes{phylum}(100);Sphingobacteriia{class}(100);Sphingobacteriales{order}(100);Chitinophagaceae{family}(100);Chitinophaga{genus}(100);Unassigned{species}(0)	Bacteria	Bacteroidetes	Sphingobacteriia	Sphingobacteriales	Chitinophagaceae	Chitinophaga	Unassigned
ASV104	351	0	534	396	282	0	68	29	45	36	59	220	44	286	0	2350	Bacteria{superkingdom}(100);Actinobacteria{phylum}(100);Actinobacteria{class}(100);Actinomycetales{order}(100);Nocardioidaceae{family}(100);Nocardioides{genus}(100);Unassigned{species}(0)	Bacteria	Actinobacteria	Actinobacteria	Actinomycetales	Nocardioidaceae	Nocardioides	Unassigned
ASV105	180	75	1033	585	174	0	70	0	20	139	0	0	0	13	0	2289	Bacteria{superkingdom}(91);Actinobacteria{phylum}(91);Actinobacteria{class}(91);Actinomycetales{order}(91);Pseudonocardiaceae{family}(91);Actinophytocola{genus}(91);uncultured_bacterium{species}(91)	Bacteria	Actinobacteria	Actinobacteria	Actinomycetales	Pseudonocardiaceae	Actinophytocola	uncultured_bacterium
ASV106	0	0	9	0	0	0	0	0	0	0	0	0	0	0	0	9	Bacteria{superkingdom}(100);Proteobacteria{phylum}(100);Betaproteobacteria{class}(100);Burkholderiales{order}(100);Oxalobacteraceae{family}(100);Massilia{genus}(100);Unassigned{species}(0)	Bacteria	Proteobacteria	Betaproteobacteria	Burkholderiales	Oxalobacteraceae	Massilia	Unassigned
ASV107	0	0	0	0	0	22	0	0	0	89	0	291	58	114	0	574	Bacteria{superkingdom}(100);Chloroflexi{phylum}(100);Thermomicrobia{class}(100);Unassigned{order}(0);Unassigned{family}(0);Unassigned{genus}(0);Unassigned{species}(0)	Bacteria	Chloroflexi	Thermomicrobia	Unassigned	Unassigned	Unassigned	Unassigned
ASV108	0	42	0	16	24	20	0	24	66	74	7	125	49	187	38	672	Bacteria{superkingdom}(99);Proteobacteria{phylum}(99);Alphaproteobacteria{class}(99);Rhizobiales{order}(99);Methylobacteriaceae{family}(99);Microvirga{genus}(99);Unassigned{species}(0)	Bacteria	Proteobacteria	Alphaproteobacteria	Rhizobiales	Methylobacteriaceae	Microvirga	Unassigned
ASV109	204	0	295	18	82	28	22	80	39	84	46	92	32	1308	0	2330	Bacteria{superkingdom}(80);Proteobacteria{phylum}(80);Deltaproteobacteria{class}(80);Myxococcales{order}(80);Cystobacteraceae{family}(80);Unassigned{genus}(0);Unassigned{species}(0)	Bacteria	Proteobacteria	Deltaproteobacteria	Myxococcales	Cystobacteraceae	Unassigned	Unassigned
ASV110	0	0	0	0	0	0	0	0	0	0	0	36	0	0	0	36	Bacteria{superkingdom}(91);Actinobacteria{phylum}(91);Actinobacteria{class}(91);Actinomycetales{order}(91);Micrococcaceae{family}(91);Arthrobacter{genus}(91);Unassigned{species}(0)	Bacteria	Actinobacteria	Actinobacteria	Actinomycetales	Micrococcaceae	Arthrobacter	Unassigned
ASV111	85	0	87	74	80	573	551	383	357	549	116	233	746	371	565	4770	Bacteria{superkingdom}(100);Acidobacteria{phylum}(100);Acidobacteria_Gp6{class}(100);{order}(100);{family}(100);Gp6{genus}(100);Unassigned{species}(0)	Bacteria	Acidobacteria	Acidobacteria_Gp6			Gp6	Unassigned
ASV112	0	37	0	38	0	0	0	15	0	32	204	23	0	0	0	349	Bacteria{superkingdom}(100);Acidobacteria{phylum}(100);Acidobacteria_Gp10{class}(100);{order}(100);{family}(100);Gp10{genus}(100);Unassigned{species}(0)	Bacteria	Acidobacteria	Acidobacteria_Gp10			Gp10	Unassigned
ASV113	0	0	0	0	0	3	0	0	7	0	0	0	0	0	0	10	Bacteria{superkingdom}(94);Cyanobacteria/Chloroplast{phylum}(94);Cyanobacteria{class}(94);{order}(94);{family}(94);{genus}(94);Unassigned{species}(0)	Bacteria	Cyanobacteria/Chloroplast	Cyanobacteria				Unassigned
ASV114	334	202	314	291	553	37	92	102	79	210	62	245	281	173	77	3052	Bacteria{superkingdom}(100);Proteobacteria{phylum}(100);Alphaproteobacteria{class}(100);Rhizobiales{order}(100);Rhizobiaceae{family}(100);Unassigned{genus}(0);Unassigned{species}(0)	Bacteria	Proteobacteria	Alphaproteobacteria	Rhizobiales	Rhizobiaceae	Unassigned	Unassigned
ASV115	287	71	57	451	306	287	76	111	119	109	261	450	156	200	383	3324	Bacteria{superkingdom}(100);Proteobacteria{phylum}(100);Alphaproteobacteria{class}(100);Rhizobiales{order}(100);Unassigned{family}(0);Unassigned{genus}(0);Unassigned{species}(0)	Bacteria	Proteobacteria	Alphaproteobacteria	Rhizobiales	Unassigned	Unassigned	Unassigned
ASV116	0	0	0	0	0	0	0	0	0	0	0	24	0	0	0	24	Bacteria{superkingdom}(100);Firmicutes{phylum}(100);Bacilli{class}(100);Bacillales{order}(100);Bacillaceae_1{family}(100);Domibacillus{genus}(100);Unassigned{species}(0)	Bacteria	Firmicutes	Bacilli	Bacillales	Bacillaceae_1	Domibacillus	Unassigned
ASV117	411	36	301	306	214	21	122	44	80	84	62	275	354	147	107	2564	Bacteria{superkingdom}(100);Actinobacteria{phylum}(100);Actinobacteria{class}(100);Actinomycetales{order}(100);Nocardioidaceae{family}(100);Nocardioides{genus}(100);Unassigned{species}(0)	Bacteria	Actinobacteria	Actinobacteria	Actinomycetales	Nocardioidaceae	Nocardioides	Unassigned
ASV118	150	162	179	292	539	0	734	393	100	82	934	28	0	0	43	3636	Bacteria{superkingdom}(100);Acidobacteria{phylum}(100);Acidobacteria_Gp7{class}(100);{order}(100);{family}(100);Gp7{genus}(100);Unassigned{species}(0)	Bacteria	Acidobacteria	Acidobacteria_Gp7			Gp7	Unassigned
ASV119	229	229	251	139	149	75	66	113	165	113	63	45	82	99	44	1862	Bacteria{superkingdom}(100);Gemmatimonadetes{phylum}(100);Gemmatimonadetes{class}(100);Gemmatimonadales{order}(100);Gemmatimonadaceae{family}(100);Gemmatimonas{genus}(100);Unassigned{species}(0)	Bacteria	Gemmatimonadetes	Gemmatimonadetes	Gemmatimonadales	Gemmatimonadaceae	Gemmatimonas	Unassigned
ASV120	41	0	0	0	0	0	0	0	0	0	0	0	0	0	476	517	Bacteria{superkingdom}(98);Acidobacteria{phylum}(98);Acidobacteria_Gp4{class}(98);{order}(98);{family}(98);Gp4{genus}(98);uncultured_actinobacterium{species}(98)	Bacteria	Acidobacteria	Acidobacteria_Gp4			Gp4	uncultured_actinobacterium
ASV121	121	130	134	158	111	452	158	60	214	85	54	98	31	78	228	2112	Bacteria{superkingdom}(100);Planctomycetes{phylum}(100);Planctomycetia{class}(100);Planctomycetales{order}(100);Planctomycetaceae{family}(100);Pirellula{genus}(100);Unassigned{species}(0)	Bacteria	Planctomycetes	Planctomycetia	Planctomycetales	Planctomycetaceae	Pirellula	Unassigned
ASV122	0	22	0	0	0	0	0	0	0	34	0	0	0	0	0	56	Bacteria{superkingdom}(100);Acidobacteria{phylum}(100);Acidobacteria_Gp4{class}(100);{order}(100);{family}(100);Gp4{genus}(100);Unassigned{species}(0)	Bacteria	Acidobacteria	Acidobacteria_Gp4			Gp4	Unassigned
ASV123	0	0	0	356	0	0	0	49	0	0	0	0	0	0	0	405	Bacteria{superkingdom}(100);Actinobacteria{phylum}(100);Actinobacteria{class}(100);Actinomycetales{order}(100);Streptomycetaceae{family}(100);Streptomyces{genus}(100);Unassigned{species}(0)	Bacteria	Actinobacteria	Actinobacteria	Actinomycetales	Streptomycetaceae	Streptomyces	Unassigned
ASV124	45	0	135	265	174	376	174	532	566	303	444	38	157	136	497	3842	Bacteria{superkingdom}(100);Bacteroidetes{phylum}(100);Cytophagia{class}(100);Cytophagales{order}(100);Cytophagaceae{family}(100);Adhaeribacter{genus}(100);Unassigned{species}(0)	Bacteria	Bacteroidetes	Cytophagia	Cytophagales	Cytophagaceae	Adhaeribacter	Unassigned
ASV125	0	0	0	0	21	0	0	0	0	31	0	19	0	0	0	71	Bacteria{superkingdom}(99);Acidobacteria{phylum}(99);Acidobacteria_Gp4{class}(99);{order}(99);{family}(99);Gp4{genus}(99);Unassigned{species}(0)	Bacteria	Acidobacteria	Acidobacteria_Gp4			Gp4	Unassigned
ASV126	46	89	0	32	0	95	0	65	0	138	82	664	128	306	104	1749	Bacteria{superkingdom}(99);Actinobacteria{phylum}(99);Actinobacteria{class}(99);{order}(99);{family}(99);{genus}(99);uncultured_Actinomycetales_bacterium{species}(99)	Bacteria	Actinobacteria	Actinobacteria				uncultured_Actinomycetales_bacterium
ASV127	176	29	207	101	227	167	91	887	459	121	1851	501	65	57	248	5187	Bacteria{superkingdom}(98);Nitrospirae{phylum}(98);Nitrospira{class}(98);Nitrospirales{order}(98);Nitrospiraceae{family}(98);Nitrospira{genus}(98);uncultured_organism{species}(98)	Bacteria	Nitrospirae	Nitrospira	Nitrospirales	Nitrospiraceae	Nitrospira	uncultured_organism
ASV129	0	178	19	25	89	87	100	0	165	43	63	53	23	128	169	1142	Bacteria{superkingdom}(100);Actinobacteria{phylum}(100);Actinobacteria{class}(100);Actinomycetales{order}(100);Pseudonocardiaceae{family}(100);Lentzea{genus}(100);Unassigned{species}(0)	Bacteria	Actinobacteria	Actinobacteria	Actinomycetales	Pseudonocardiaceae	Lentzea	Unassigned
ASV130	154	290	174	132	109	115	0	118	0	152	79	83	252	443	158	2259	Bacteria{superkingdom}(100);Actinobacteria{phylum}(100);Actinobacteria{class}(100);Solirubrobacterales{order}(100);Solirubrobacteraceae{family}(100);Solirubrobacter{genus}(100);Unassigned{species}(0)	Bacteria	Actinobacteria	Actinobacteria	Solirubrobacterales	Solirubrobacteraceae	Solirubrobacter	Unassigned
ASV131	42	34	20	56	5	7	120	186	99	103	9	178	467	113	64	1503	Bacteria{superkingdom}(88);Chloroflexi{phylum}(88);Chloroflexia{class}(88);Kallotenuales{order}(88);Kallotenuaceae{family}(88);Kallotenue{genus}(88);uncultured_soil_bacterium{species}(88)	Bacteria	Chloroflexi	Chloroflexia	Kallotenuales	Kallotenuaceae	Kallotenue	uncultured_soil_bacterium
ASV132	317	162	234	1088	611	49	33	173	245	0	339	115	90	29	39	3524	Bacteria{superkingdom}(100);Proteobacteria{phylum}(100);Gammaproteobacteria{class}(100);Xanthomonadales{order}(100);Sinobacteraceae{family}(100);Steroidobacter{genus}(100);Unassigned{species}(0)	Bacteria	Proteobacteria	Gammaproteobacteria	Xanthomonadales	Sinobacteraceae	Steroidobacter	Unassigned
ASV133	0	76	0	0	30	0	0	0	14	0	0	15	0	0	0	135	Bacteria{superkingdom}(100);Acidobacteria{phylum}(100);Acidobacteria_Gp4{class}(100);{order}(100);{family}(100);Gp4{genus}(100);uncultured_actinobacterium{species}(100)	Bacteria	Acidobacteria	Acidobacteria_Gp4			Gp4	uncultured_actinobacterium
ASV134	0	119	0	0	6	0	0	73	0	29	0	38	25	15	60	365	Bacteria{superkingdom}(86);Proteobacteria{phylum}(86);Betaproteobacteria{class}(86);{order}(86);{family}(86);{genus}(86);Unassigned{species}(0)	Bacteria	Proteobacteria	Betaproteobacteria				Unassigned
ASV135	136	172	160	49	81	66	168	57	53	139	0	83	35	75	26	1300	Bacteria{superkingdom}(100);Acidobacteria{phylum}(100);Acidobacteria_Gp16{class}(100);{order}(100);{family}(100);Gp16{genus}(100);Unassigned{species}(0)	Bacteria	Acidobacteria	Acidobacteria_Gp16			Gp16	Unassigned
ASV136	86	41	0	225	187	50	0	98	0	0	0	47	0	68	46	848	Bacteria{superkingdom}(91);Proteobacteria{phylum}(91);Gammaproteobacteria{class}(91);Xanthomonadales{order}(91);Sinobacteraceae{family}(91);Steroidobacter{genus}(91);Unassigned{species}(0)	Bacteria	Proteobacteria	Gammaproteobacteria	Xanthomonadales	Sinobacteraceae	Steroidobacter	Unassigned
ASV137	120	194	85	249	224	105	75	45	74	179	169	125	114	195	136	2089	Bacteria{superkingdom}(94);Proteobacteria{phylum}(94);Alphaproteobacteria{class}(94);Rhizobiales{order}(94);Bradyrhizobiaceae{family}(94);Bradyrhizobium{genus}(94);Unassigned{species}(0)	Bacteria	Proteobacteria	Alphaproteobacteria	Rhizobiales	Bradyrhizobiaceae	Bradyrhizobium	Unassigned
ASV138	0	14	0	0	0	0	0	0	0	0	0	0	0	0	0	14	Bacteria{superkingdom}(100);Acidobacteria{phylum}(100);Acidobacteria_Gp4{class}(100);{order}(100);{family}(100);Gp4{genus}(100);Unassigned{species}(0)	Bacteria	Acidobacteria	Acidobacteria_Gp4			Gp4	Unassigned
ASV139	0	0	251	408	0	0	114	78	141	0	0	0	0	0	0	992	Bacteria{superkingdom}(100);Actinobacteria{phylum}(100);Actinobacteria{class}(100);Actinomycetales{order}(100);Streptomycetaceae{family}(100);Streptomyces{genus}(100);Unassigned{species}(0)	Bacteria	Actinobacteria	Actinobacteria	Actinomycetales	Streptomycetaceae	Streptomyces	Unassigned
ASV140	0	449	52	119	112	0	14	151	7	0	0	0	0	1088	272	2264	Bacteria{superkingdom}(100);Acidobacteria{phylum}(100);Acidobacteria_Gp7{class}(100);{order}(100);{family}(100);Gp7{genus}(100);Unassigned{species}(0)	Bacteria	Acidobacteria	Acidobacteria_Gp7			Gp7	Unassigned
ASV141	160	936	886	226	94	76	0	232	18	104	0	0	23	213	0	2968	Bacteria{superkingdom}(96);Actinobacteria{phylum}(96);Actinobacteria{class}(96);Solirubrobacterales{order}(96);Conexibacteraceae{family}(96);Conexibacter{genus}(96);Unassigned{species}(0)	Bacteria	Actinobacteria	Actinobacteria	Solirubrobacterales	Conexibacteraceae	Conexibacter	Unassigned
ASV142	270	183	233	262	186	16	13	41	61	82	123	796	106	1149	249	3770	Bacteria{superkingdom}(100);Actinobacteria{phylum}(100);Actinobacteria{class}(100);Actinomycetales{order}(100);Nocardioidaceae{family}(100);Nocardioides{genus}(100);Unassigned{species}(0)	Bacteria	Actinobacteria	Actinobacteria	Actinomycetales	Nocardioidaceae	Nocardioides	Unassigned
ASV143	187	53	198	114	64	344	257	260	529	144	217	128	313	94	132	3034	Bacteria{superkingdom}(99);Chloroflexi{phylum}(99);Chloroflexia{class}(99);{order}(99);{family}(99);{genus}(99);uncultured_bacterium{species}(99)	Bacteria	Chloroflexi	Chloroflexia				uncultured_bacterium
ASV146	157	17	161	109	61	88	144	478	153	280	104	36	80	81	533	2482	Bacteria{superkingdom}(93);Chloroflexi{phylum}(93);Anaerolineae{class}(93);Anaerolineales{order}(93);Anaerolineaceae{family}(93);{genus}(93);uncultured_Caldilineales_bacterium{species}(93)	Bacteria	Chloroflexi	Anaerolineae	Anaerolineales	Anaerolineaceae		uncultured_Caldilineales_bacterium
ASV147	0	0	0	0	0	0	0	0	0	0	0	5	0	0	0	5	Bacteria{superkingdom}(100);Bacteroidetes{phylum}(100);Cytophagia{class}(100);Cytophagales{order}(100);Cytophagaceae{family}(100);Rufibacter{genus}(100);uncultured_bacterium{species}(100)	Bacteria	Bacteroidetes	Cytophagia	Cytophagales	Cytophagaceae	Rufibacter	uncultured_bacterium
ASV148	291	140	26	45	807	42	178	0	112	0	50	31	0	63	113	1898	Bacteria{superkingdom}(98);Bacteroidetes{phylum}(98);Sphingobacteriia{class}(98);Sphingobacteriales{order}(98);Chitinophagaceae{family}(98);Chitinophaga{genus}(98);Chitinophaga_japonensis{species}(98)	Bacteria	Bacteroidetes	Sphingobacteriia	Sphingobacteriales	Chitinophagaceae	Chitinophaga	Chitinophaga_japonensis
ASV149	405	37	321	49	211	351	65	189	895	170	300	0	0	0	139	3132	Bacteria{superkingdom}(97);Firmicutes{phylum}(97);Bacilli{class}(97);Bacillales{order}(97);Bacillaceae_1{family}(97);Bacillus{genus}(97);Unassigned{species}(0)	Bacteria	Firmicutes	Bacilli	Bacillales	Bacillaceae_1	Bacillus	Unassigned
ASV150	145	0	160	113	379	0	38	19	28	81	0	129	43	21	0	1156	Bacteria{superkingdom}(100);Chloroflexi{phylum}(100);Thermomicrobia{class}(100);Sphaerobacterales{order}(100);Sphaerobacteraceae{family}(100);Sphaerobacter{genus}(100);uncultured_bacterium{species}(100)	Bacteria	Chloroflexi	Thermomicrobia	Sphaerobacterales	Sphaerobacteraceae	Sphaerobacter	uncultured_bacterium
ASV151	578	361	289	165	198	192	122	199	164	234	114	0	37	320	467	3440	Bacteria{superkingdom}(100);Actinobacteria{phylum}(100);Actinobacteria{class}(100);Actinomycetales{order}(100);Nocardioidaceae{family}(100);Nocardioides{genus}(100);Unassigned{species}(0)	Bacteria	Actinobacteria	Actinobacteria	Actinomycetales	Nocardioidaceae	Nocardioides	Unassigned
ASV152	209	65	205	402	522	36	48	29	73	105	104	21	0	40	78	1937	Bacteria{superkingdom}(89);Proteobacteria{phylum}(89);Betaproteobacteria{class}(89);Burkholderiales{order}(89);Comamonadaceae{family}(89);Variovorax{genus}(89);Unassigned{species}(0)	Bacteria	Proteobacteria	Betaproteobacteria	Burkholderiales	Comamonadaceae	Variovorax	Unassigned
ASV153	23	15	0	131	0	0	12	164	23	0	40	0	0	0	34	442	Bacteria{superkingdom}(100);Acidobacteria{phylum}(100);Acidobacteria_Gp10{class}(100);{order}(100);{family}(100);Gp10{genus}(100);Unassigned{species}(0)	Bacteria	Acidobacteria	Acidobacteria_Gp10			Gp10	Unassigned
ASV154	116	0	85	617	131	0	0	0	20	0	202	0	0	0	0	1171	Bacteria{superkingdom}(100);Bacteroidetes{phylum}(100);Sphingobacteriia{class}(100);Sphingobacteriales{order}(100);Chitinophagaceae{family}(100);Chitinophaga{genus}(100);Unassigned{species}(0)	Bacteria	Bacteroidetes	Sphingobacteriia	Sphingobacteriales	Chitinophagaceae	Chitinophaga	Unassigned
ASV155	0	0	0	0	6	0	0	68	0	56	0	33	0	108	0	271	Bacteria{superkingdom}(100);Proteobacteria{phylum}(100);Alphaproteobacteria{class}(100);Rhizobiales{order}(100);Methylobacteriaceae{family}(100);Microvirga{genus}(100);Unassigned{species}(0)	Bacteria	Proteobacteria	Alphaproteobacteria	Rhizobiales	Methylobacteriaceae	Microvirga	Unassigned
ASV156	0	7	16	6	0	0	0	0	0	4	4	0	0	0	0	37	Bacteria{superkingdom}(90);Cyanobacteria/Chloroplast{phylum}(90);Cyanobacteria{class}(90);{order}(90);Family_XIII{family}(90);GpXIII{genus}(90);uncultured_soil_bacterium{species}(90)	Bacteria	Cyanobacteria/Chloroplast	Cyanobacteria		Family_XIII	GpXIII	uncultured_soil_bacterium
ASV157	383	48	86	103	61	197	350	138	48	256	0	0	0	5	32	1707	Bacteria{superkingdom}(100);Chloroflexi{phylum}(100);Chloroflexia{class}(100);{order}(100);{family}(100);{genus}(100);uncultured_bacterium{species}(100)	Bacteria	Chloroflexi	Chloroflexia				uncultured_bacterium
ASV158	172	259	174	342	95	138	144	74	100	194	220	109	0	259	215	2495	Bacteria{superkingdom}(100);Chloroflexi{phylum}(100);Thermomicrobia{class}(100);Unassigned{order}(0);Unassigned{family}(0);Unassigned{genus}(0);Unassigned{species}(0)	Bacteria	Chloroflexi	Thermomicrobia	Unassigned	Unassigned	Unassigned	Unassigned
ASV159	85	125	125	68	50	134	141	116	209	137	131	202	100	98	111	1832	Bacteria{superkingdom}(100);Unassigned{phylum}(0);Unassigned{class}(0);Unassigned{order}(0);Unassigned{family}(0);Unassigned{genus}(0);Unassigned{species}(0)	Bacteria	Unassigned	Unassigned	Unassigned	Unassigned	Unassigned	Unassigned
ASV160	35	118	33	102	82	188	119	311	194	221	435	279	685	136	338	3276	Bacteria{superkingdom}(94);Proteobacteria{phylum}(94);Betaproteobacteria{class}(94);{order}(94);{family}(94);{genus}(94);Unassigned{species}(0)	Bacteria	Proteobacteria	Betaproteobacteria				Unassigned
ASV161	0	117	0	0	0	0	0	59	0	54	0	0	0	0	0	230	Bacteria{superkingdom}(100);Acidobacteria{phylum}(100);Acidobacteria_Gp4{class}(100);{order}(100);{family}(100);Gp4{genus}(100);Unassigned{species}(0)	Bacteria	Acidobacteria	Acidobacteria_Gp4			Gp4	Unassigned
ASV162	1285	0	607	154	373	245	117	573	45	0	37	0	0	16	0	3452	Bacteria{superkingdom}(100);Firmicutes{phylum}(100);Bacilli{class}(100);Bacillales{order}(100);Bacillaceae_1{family}(100);Bacillus{genus}(100);Unassigned{species}(0)	Bacteria	Firmicutes	Bacilli	Bacillales	Bacillaceae_1	Bacillus	Unassigned
ASV163	81	17	150	270	179	87	85	76	128	17	19	41	47	40	146	1383	Bacteria{superkingdom}(100);Proteobacteria{phylum}(100);Gammaproteobacteria{class}(100);Xanthomonadales{order}(100);Sinobacteraceae{family}(100);Steroidobacter{genus}(100);Unassigned{species}(0)	Bacteria	Proteobacteria	Gammaproteobacteria	Xanthomonadales	Sinobacteraceae	Steroidobacter	Unassigned
ASV164	302	161	993	1133	663	20	73	0	27	0	29	0	0	166	155	3722	Bacteria{superkingdom}(100);Actinobacteria{phylum}(100);Actinobacteria{class}(100);Actinomycetales{order}(100);Pseudonocardiaceae{family}(100);Pseudonocardia{genus}(100);Unassigned{species}(0)	Bacteria	Actinobacteria	Actinobacteria	Actinomycetales	Pseudonocardiaceae	Pseudonocardia	Unassigned
ASV165	145	0	109	213	108	41	44	137	63	126	148	133	153	146	151	1717	Bacteria{superkingdom}(100);Proteobacteria{phylum}(100);Alphaproteobacteria{class}(100);Rhizobiales{order}(100);Methylobacteriaceae{family}(100);Microvirga{genus}(100);Unassigned{species}(0)	Bacteria	Proteobacteria	Alphaproteobacteria	Rhizobiales	Methylobacteriaceae	Microvirga	Unassigned
ASV166	82	117	161	43	125	78	102	192	256	119	174	316	144	89	123	2121	Bacteria{superkingdom}(100);Proteobacteria{phylum}(100);Betaproteobacteria{class}(100);{order}(100);{family}(100);{genus}(100);Unassigned{species}(0)	Bacteria	Proteobacteria	Betaproteobacteria				Unassigned
ASV167	16	0	75	0	0	0	487	0	1650	725	642	44	0	0	334	3973	Bacteria{superkingdom}(100);Acidobacteria{phylum}(100);Acidobacteria_Gp10{class}(100);{order}(100);{family}(100);Gp10{genus}(100);Unassigned{species}(0)	Bacteria	Acidobacteria	Acidobacteria_Gp10			Gp10	Unassigned
ASV168	8	15	0	0	5	0	0	0	13	0	0	84	41	30	0	196	Bacteria{superkingdom}(99);Actinobacteria{phylum}(99);Actinobacteria{class}(99);Actinomycetales{order}(99);Streptomycetaceae{family}(99);Streptomyces{genus}(99);Unassigned{species}(0)	Bacteria	Actinobacteria	Actinobacteria	Actinomycetales	Streptomycetaceae	Streptomyces	Unassigned
ASV169	263	430	360	0	633	0	154	176	47	0	390	7	18	14	0	2492	Bacteria{superkingdom}(100);Actinobacteria{phylum}(100);Actinobacteria{class}(100);Actinomycetales{order}(100);Streptomycetaceae{family}(100);Streptomyces{genus}(100);Unassigned{species}(0)	Bacteria	Actinobacteria	Actinobacteria	Actinomycetales	Streptomycetaceae	Streptomyces	Unassigned
ASV170	0	0	0	0	0	0	0	0	0	38	0	80	0	43	0	161	Bacteria{superkingdom}(99);Proteobacteria{phylum}(99);Alphaproteobacteria{class}(99);Rhizobiales{order}(99);Methylobacteriaceae{family}(99);Microvirga{genus}(99);Unassigned{species}(0)	Bacteria	Proteobacteria	Alphaproteobacteria	Rhizobiales	Methylobacteriaceae	Microvirga	Unassigned
ASV172	0	0	0	0	0	0	0	20	0	0	0	0	0	75	0	95	Bacteria{superkingdom}(100);Chloroflexi{phylum}(100);Chloroflexia{class}(100);Kallotenuales{order}(100);Kallotenuaceae{family}(100);Kallotenue{genus}(100);Unassigned{species}(0)	Bacteria	Chloroflexi	Chloroflexia	Kallotenuales	Kallotenuaceae	Kallotenue	Unassigned
ASV173	140	61	177	123	143	28	28	57	54	73	0	74	38	128	92	1216	Bacteria{superkingdom}(100);Actinobacteria{phylum}(100);Actinobacteria{class}(100);Solirubrobacterales{order}(100);Solirubrobacteraceae{family}(100);Solirubrobacter{genus}(100);Unassigned{species}(0)	Bacteria	Actinobacteria	Actinobacteria	Solirubrobacterales	Solirubrobacteraceae	Solirubrobacter	Unassigned
ASV174	0	120	0	0	0	900	315	738	0	1147	0	0	0	0	0	3220	Bacteria{superkingdom}(100);Acidobacteria{phylum}(100);Acidobacteria_Gp4{class}(100);{order}(100);{family}(100);Gp4{genus}(100);Unassigned{species}(0)	Bacteria	Acidobacteria	Acidobacteria_Gp4			Gp4	Unassigned
ASV176	48	0	17	19	0	0	0	70	0	948	0	0	0	0	108	1210	Bacteria{superkingdom}(84);Acidobacteria{phylum}(84);Acidobacteria_Gp7{class}(84);{order}(84);{family}(84);Gp7{genus}(84);uncultured_soil_bacterium{species}(84)	Bacteria	Acidobacteria	Acidobacteria_Gp7			Gp7	uncultured_soil_bacterium
ASV177	0	0	0	44	0	0	0	0	0	0	0	0	0	0	0	44	Bacteria{superkingdom}(100);Acidobacteria{phylum}(100);Acidobacteria_Gp10{class}(100);{order}(100);{family}(100);Gp10{genus}(100);Unassigned{species}(0)	Bacteria	Acidobacteria	Acidobacteria_Gp10			Gp10	Unassigned
ASV178	321	61	170	96	82	205	183	453	236	162	195	15	15	95	66	2355	Bacteria{superkingdom}(100);Firmicutes{phylum}(100);Bacilli{class}(100);Bacillales{order}(100);Bacillaceae_1{family}(100);Bacillus{genus}(100);Unassigned{species}(0)	Bacteria	Firmicutes	Bacilli	Bacillales	Bacillaceae_1	Bacillus	Unassigned
ASV179	268	21	141	111	119	45	88	62	97	66	94	51	64	75	68	1370	Bacteria{superkingdom}(97);Proteobacteria{phylum}(97);Alphaproteobacteria{class}(97);Rhizobiales{order}(97);Xanthobacteraceae{family}(97);Pseudolabrys{genus}(97);Unassigned{species}(0)	Bacteria	Proteobacteria	Alphaproteobacteria	Rhizobiales	Xanthobacteraceae	Pseudolabrys	Unassigned
ASV180	71	61	15	22	25	426	255	321	127	511	0	95	22	66	273	2290	Bacteria{superkingdom}(100);Actinobacteria{phylum}(100);Actinobacteria{class}(100);{order}(100);{family}(100);{genus}(100);Unassigned{species}(0)	Bacteria	Actinobacteria	Actinobacteria				Unassigned
ASV181	0	59	51	101	100	224	89	70	222	118	314	172	153	0	118	1791	Bacteria{superkingdom}(99);Acidobacteria{phylum}(99);Acidobacteria_Gp6{class}(99);{order}(99);{family}(99);Gp6{genus}(99);Unassigned{species}(0)	Bacteria	Acidobacteria	Acidobacteria_Gp6			Gp6	Unassigned
ASV183	0	0	305	56	1112	338	515	125	299	828	1277	300	15	1	453	5624	Bacteria{superkingdom}(100);Proteobacteria{phylum}(100);Alphaproteobacteria{class}(100);Rhizobiales{order}(100);Methylobacteriaceae{family}(100);Microvirga{genus}(100);Unassigned{species}(0)	Bacteria	Proteobacteria	Alphaproteobacteria	Rhizobiales	Methylobacteriaceae	Microvirga	Unassigned
ASV184	0	0	0	0	0	0	0	0	0	0	0	0	4	0	5	9	Bacteria{superkingdom}(100);Bacteroidetes{phylum}(100);Sphingobacteriia{class}(100);Sphingobacteriales{order}(100);Sphingobacteriaceae{family}(100);Olivibacter{genus}(100);Unassigned{species}(0)	Bacteria	Bacteroidetes	Sphingobacteriia	Sphingobacteriales	Sphingobacteriaceae	Olivibacter	Unassigned
ASV185	20	50	25	108	0	0	0	0	0	0	26	0	0	180	22	431	Bacteria{superkingdom}(100);Acidobacteria{phylum}(100);Acidobacteria_Gp10{class}(100);{order}(100);{family}(100);Gp10{genus}(100);Unassigned{species}(0)	Bacteria	Acidobacteria	Acidobacteria_Gp10			Gp10	Unassigned
ASV186	362	65	92	108	49	275	390	144	0	237	0	0	0	0	27	1749	Bacteria{superkingdom}(100);Chloroflexi{phylum}(100);Chloroflexia{class}(100);{order}(100);{family}(100);{genus}(100);uncultured_bacterium{species}(100)	Bacteria	Chloroflexi	Chloroflexia				uncultured_bacterium
ASV187	0	0	0	177	16	0	0	0	39	22	0	35	0	119	0	408	Bacteria{superkingdom}(100);Actinobacteria{phylum}(100);Actinobacteria{class}(100);Actinomycetales{order}(100);Pseudonocardiaceae{family}(100);Amycolatopsis{genus}(100);Unassigned{species}(0)	Bacteria	Actinobacteria	Actinobacteria	Actinomycetales	Pseudonocardiaceae	Amycolatopsis	Unassigned
ASV188	0	238	0	0	11	60	268	177	0	188	19	35	259	418	84	1757	Bacteria{superkingdom}(90);Proteobacteria{phylum}(90);Alphaproteobacteria{class}(90);Alphaproteobacteria_incertae_sedis{order}(90);{family}(90);Geminicoccus{genus}(90);uncultured_bacterium{species}(90)	Bacteria	Proteobacteria	Alphaproteobacteria	Alphaproteobacteria_incertae_sedis		Geminicoccus	uncultured_bacterium
ASV189	432	0	553	840	345	30	0	91	1103	561	68	0	0	0	0	4023	Bacteria{superkingdom}(90);Firmicutes{phylum}(90);Bacilli{class}(90);Bacillales{order}(90);Bacillaceae_1{family}(90);Bacillus{genus}(90);Unassigned{species}(0)	Bacteria	Firmicutes	Bacilli	Bacillales	Bacillaceae_1	Bacillus	Unassigned
ASV190	0	0	0	0	0	0	0	0	17	421	0	0	0	0	0	438	Bacteria{superkingdom}(94);Bacteroidetes{phylum}(94);Cytophagia{class}(94);Cytophagales{order}(94);Cytophagaceae{family}(94);Rufibacter{genus}(94);uncultured_bacterium{species}(94)	Bacteria	Bacteroidetes	Cytophagia	Cytophagales	Cytophagaceae	Rufibacter	uncultured_bacterium
ASV191	0	0	0	18	0	0	0	0	20	48	0	56	45	33	0	220	Bacteria{superkingdom}(98);Proteobacteria{phylum}(98);Betaproteobacteria{class}(98);Burkholderiales{order}(98);Oxalobacteraceae{family}(98);Noviherbaspirillum{genus}(98);Unassigned{species}(0)	Bacteria	Proteobacteria	Betaproteobacteria	Burkholderiales	Oxalobacteraceae	Noviherbaspirillum	Unassigned
ASV192	0	0	0	0	0	0	0	0	13	51	0	0	0	0	0	64	Bacteria{superkingdom}(99);Proteobacteria{phylum}(99);Alphaproteobacteria{class}(99);Rhodobacterales{order}(99);Rhodobacteraceae{family}(99);Paracoccus{genus}(99);Unassigned{species}(0)	Bacteria	Proteobacteria	Alphaproteobacteria	Rhodobacterales	Rhodobacteraceae	Paracoccus	Unassigned
ASV193	0	0	88	1025	670	128	42	69	0	85	0	46	0	0	0	2153	Bacteria{superkingdom}(92);Actinobacteria{phylum}(92);Actinobacteria{class}(92);Actinomycetales{order}(92);Pseudonocardiaceae{family}(92);Actinophytocola{genus}(92);uncultured_bacterium{species}(92)	Bacteria	Actinobacteria	Actinobacteria	Actinomycetales	Pseudonocardiaceae	Actinophytocola	uncultured_bacterium
ASV194	0	0	0	0	57	0	0	207	349	77	522	12	1208	289	541	3262	Bacteria{superkingdom}(100);Bacteroidetes{phylum}(100);Cytophagia{class}(100);Cytophagales{order}(100);Cytophagaceae{family}(100);Adhaeribacter{genus}(100);Unassigned{species}(0)	Bacteria	Bacteroidetes	Cytophagia	Cytophagales	Cytophagaceae	Adhaeribacter	Unassigned
ASV195	74	31	44	119	108	57	188	221	249	107	88	119	0	0	97	1502	Bacteria{superkingdom}(100);Proteobacteria{phylum}(100);Deltaproteobacteria{class}(100);{order}(100);{family}(100);{genus}(100);uncultured_Acidobacteriales_bacterium{species}(100)	Bacteria	Proteobacteria	Deltaproteobacteria				uncultured_Acidobacteriales_bacterium
ASV196	107	274	58	87	77	254	142	136	102	61	30	21	36	10	50	1445	Bacteria{superkingdom}(100);Proteobacteria{phylum}(100);Alphaproteobacteria{class}(100);Rhizobiales{order}(100);Rhodobiaceae{family}(100);{genus}(100);uncultured_soil_bacterium{species}(100)	Bacteria	Proteobacteria	Alphaproteobacteria	Rhizobiales	Rhodobiaceae		uncultured_soil_bacterium
ASV197	0	61	0	60	0	0	0	43	33	43	0	397	101	108	0	846	Bacteria{superkingdom}(100);Chloroflexi{phylum}(100);Thermomicrobia{class}(100);Unassigned{order}(0);Unassigned{family}(0);Unassigned{genus}(0);Unassigned{species}(0)	Bacteria	Chloroflexi	Thermomicrobia	Unassigned	Unassigned	Unassigned	Unassigned
ASV198	49	160	56	0	154	141	41	57	125	59	39	0	0	0	69	950	Bacteria{superkingdom}(100);Acidobacteria{phylum}(100);Acidobacteria_Gp6{class}(100);{order}(100);{family}(100);Gp6{genus}(100);Unassigned{species}(0)	Bacteria	Acidobacteria	Acidobacteria_Gp6			Gp6	Unassigned
ASV200	11	15	14	29	14	43	23	91	217	110	512	75	285	47	206	1692	Bacteria{superkingdom}(99);Proteobacteria{phylum}(99);Betaproteobacteria{class}(99);Burkholderiales{order}(99);Comamonadaceae{family}(99);Unassigned{genus}(0);Unassigned{species}(0)	Bacteria	Proteobacteria	Betaproteobacteria	Burkholderiales	Comamonadaceae	Unassigned	Unassigned
ASV201	234	172	114	230	384	156	320	363	49	739	500	234	438	644	328	4905	Bacteria{superkingdom}(100);Actinobacteria{phylum}(100);Actinobacteria{class}(100);Actinomycetales{order}(100);Micrococcaceae{family}(100);Arthrobacter{genus}(100);Unassigned{species}(0)	Bacteria	Actinobacteria	Actinobacteria	Actinomycetales	Micrococcaceae	Arthrobacter	Unassigned
ASV202	0	93	0	4	0	45	65	64	0	96	5	17	75	259	74	797	Bacteria{superkingdom}(90);Armatimonadetes{phylum}(90);Armatimonadia{class}(90);Armatimonadales{order}(90);Armatimonadaceae{family}(90);Armatimonas/Armatimonadetes_gp1{genus}(90);uncultured_bacterium{species}(90)	Bacteria	Armatimonadetes	Armatimonadia	Armatimonadales	Armatimonadaceae	Armatimonas/Armatimonadetes_gp1	uncultured_bacterium
ASV203	85	21	5	0	0	0	28	136	14	104	0	197	0	0	0	590	Bacteria{superkingdom}(92);Chloroflexi{phylum}(92);Chloroflexia{class}(92);Kallotenuales{order}(92);Kallotenuaceae{family}(92);Kallotenue{genus}(92);uncultured_bacterium{species}(92)	Bacteria	Chloroflexi	Chloroflexia	Kallotenuales	Kallotenuaceae	Kallotenue	uncultured_bacterium
ASV204	47	248	0	0	12	0	71	586	8	0	0	0	0	0	0	972	Bacteria{superkingdom}(100);Unassigned{phylum}(0);Unassigned{class}(0);Unassigned{order}(0);Unassigned{family}(0);Unassigned{genus}(0);Unassigned{species}(0)	Bacteria	Unassigned	Unassigned	Unassigned	Unassigned	Unassigned	Unassigned
ASV205	0	0	0	71	0	87	124	229	284	276	160	96	192	46	345	1910	Bacteria{superkingdom}(100);Proteobacteria{phylum}(100);Betaproteobacteria{class}(100);Burkholderiales{order}(100);Oxalobacteraceae{family}(100);Unassigned{genus}(0);Unassigned{species}(0)	Bacteria	Proteobacteria	Betaproteobacteria	Burkholderiales	Oxalobacteraceae	Unassigned	Unassigned
ASV206	88	170	124	154	48	46	43	141	38	178	211	151	30	718	116	2256	Bacteria{superkingdom}(99);Chloroflexi{phylum}(99);Thermomicrobia{class}(99);Sphaerobacterales{order}(99);Sphaerobacteraceae{family}(99);Unassigned{genus}(0);Unassigned{species}(0)	Bacteria	Chloroflexi	Thermomicrobia	Sphaerobacterales	Sphaerobacteraceae	Unassigned	Unassigned
ASV207	0	0	0	0	0	0	0	0	0	0	0	0	36	0	0	36	Bacteria{superkingdom}(100);Chloroflexi{phylum}(100);Chloroflexia{class}(100);Kallotenuales{order}(100);Kallotenuaceae{family}(100);Kallotenue{genus}(100);Unassigned{species}(0)	Bacteria	Chloroflexi	Chloroflexia	Kallotenuales	Kallotenuaceae	Kallotenue	Unassigned
ASV208	221	0	266	71	124	40	0	321	230	102	97	36	129	75	59	1771	Bacteria{superkingdom}(86);Firmicutes{phylum}(86);Bacilli{class}(86);Bacillales{order}(86);Bacillaceae_1{family}(86);Bacillus{genus}(86);Bacillus_funiculus{species}(86)	Bacteria	Firmicutes	Bacilli	Bacillales	Bacillaceae_1	Bacillus	Bacillus_funiculus
ASV209	0	39	0	13	0	0	0	69	0	58	0	0	0	12	0	191	Bacteria{superkingdom}(100);Actinobacteria{phylum}(100);Actinobacteria{class}(100);Rubrobacterales{order}(100);Rubrobacteraceae{family}(100);Rubrobacter{genus}(100);Unassigned{species}(0)	Bacteria	Actinobacteria	Actinobacteria	Rubrobacterales	Rubrobacteraceae	Rubrobacter	Unassigned
ASV210	0	33	0	12	0	0	0	0	45	64	0	1860	182	61	0	2257	Bacteria{superkingdom}(80);Actinobacteria{phylum}(80);Actinobacteria{class}(80);Actinomycetales{order}(80);Pseudonocardiaceae{family}(80);Actinophytocola{genus}(80);uncultured_bacterium{species}(80)	Bacteria	Actinobacteria	Actinobacteria	Actinomycetales	Pseudonocardiaceae	Actinophytocola	uncultured_bacterium
ASV211	121	0	75	236	150	72	61	76	229	25	144	33	46	17	79	1364	Bacteria{superkingdom}(100);Chloroflexi{phylum}(100);Caldilineae{class}(100);Caldilineales{order}(100);Caldilineaceae{family}(100);Litorilinea{genus}(100);uncultured_Litorilinea_sp.{species}(100)	Bacteria	Chloroflexi	Caldilineae	Caldilineales	Caldilineaceae	Litorilinea	uncultured_Litorilinea_sp.
ASV212	54	0	114	50	0	194	286	191	256	370	118	52	853	25	298	2861	Bacteria{superkingdom}(100);Actinobacteria{phylum}(100);Actinobacteria{class}(100);Solirubrobacterales{order}(100);Unassigned{family}(0);Unassigned{genus}(0);Unassigned{species}(0)	Bacteria	Actinobacteria	Actinobacteria	Solirubrobacterales	Unassigned	Unassigned	Unassigned
ASV213	66	109	0	0	95	0	0	0	0	0	0	0	0	0	0	270	Bacteria{superkingdom}(94);Acidobacteria{phylum}(94);Acidobacteria_Gp4{class}(94);{order}(94);{family}(94);Gp4{genus}(94);uncultured_Rhodopseudomonas_sp.{species}(94)	Bacteria	Acidobacteria	Acidobacteria_Gp4			Gp4	uncultured_Rhodopseudomonas_sp.
ASV214	79	71	122	129	129	227	102	58	122	132	150	37	91	99	229	1777	Bacteria{superkingdom}(100);Proteobacteria{phylum}(100);Alphaproteobacteria{class}(100);Rhodospirillales{order}(100);{family}(100);Reyranella{genus}(100);Unassigned{species}(0)	Bacteria	Proteobacteria	Alphaproteobacteria	Rhodospirillales		Reyranella	Unassigned
ASV215	0	0	0	0	27	0	0	0	0	0	0	0	0	72	0	99	Bacteria{superkingdom}(90);Actinobacteria{phylum}(90);Actinobacteria{class}(90);Actinomycetales{order}(90);Streptomycetaceae{family}(90);Streptomyces{genus}(90);Unassigned{species}(0)	Bacteria	Actinobacteria	Actinobacteria	Actinomycetales	Streptomycetaceae	Streptomyces	Unassigned
ASV216	237	387	350	39	169	148	38	25	252	82	269	155	182	201	296	2830	Bacteria{superkingdom}(86);Actinobacteria{phylum}(86);Actinobacteria{class}(86);{order}(86);{family}(86);{genus}(86);Unassigned{species}(0)	Bacteria	Actinobacteria	Actinobacteria				Unassigned
ASV217	57	159	0	31	196	4773	29	78	0	258	16	0	0	0	15	5612	Bacteria{superkingdom}(91);Acidobacteria{phylum}(91);Acidobacteria_Gp7{class}(91);{order}(91);{family}(91);Gp7{genus}(91);uncultured_Anaeromyxobacter_sp.{species}(91)	Bacteria	Acidobacteria	Acidobacteria_Gp7			Gp7	uncultured_Anaeromyxobacter_sp.
ASV218	115	0	58	85	47	47	95	165	145	207	0	71	86	36	0	1157	Bacteria{superkingdom}(100);Actinobacteria{phylum}(100);Actinobacteria{class}(100);Actinomycetales{order}(100);Nocardioidaceae{family}(100);Nocardioides{genus}(100);Unassigned{species}(0)	Bacteria	Actinobacteria	Actinobacteria	Actinomycetales	Nocardioidaceae	Nocardioides	Unassigned
ASV220	26	61	39	26	13	41	82	115	42	105	20	199	238	167	119	1293	Bacteria{superkingdom}(87);Actinobacteria{phylum}(87);Actinobacteria{class}(87);Actinomycetales{order}(87);Geodermatophilaceae{family}(87);Blastococcus{genus}(87);Unassigned{species}(0)	Bacteria	Actinobacteria	Actinobacteria	Actinomycetales	Geodermatophilaceae	Blastococcus	Unassigned
ASV221	57	17	190	38	162	21	18	12	34	22	0	0	0	9	2	582	Bacteria{superkingdom}(100);Acidobacteria{phylum}(100);Acidobacteria_Gp4{class}(100);{order}(100);{family}(100);Gp4{genus}(100);Unassigned{species}(0)	Bacteria	Acidobacteria	Acidobacteria_Gp4			Gp4	Unassigned
ASV222	0	0	0	0	0	0	0	0	20	207	0	17	59	0	0	303	Bacteria{superkingdom}(100);Acidobacteria{phylum}(100);Acidobacteria_Gp4{class}(100);{order}(100);{family}(100);Gp4{genus}(100);Unassigned{species}(0)	Bacteria	Acidobacteria	Acidobacteria_Gp4			Gp4	Unassigned
ASV223	71	38	69	450	645	97	58	107	43	6	686	164	4	74	176	2688	Bacteria{superkingdom}(100);Proteobacteria{phylum}(100);Gammaproteobacteria{class}(100);Xanthomonadales{order}(100);Sinobacteraceae{family}(100);Steroidobacter{genus}(100);Unassigned{species}(0)	Bacteria	Proteobacteria	Gammaproteobacteria	Xanthomonadales	Sinobacteraceae	Steroidobacter	Unassigned
ASV224	316	181	404	716	337	0	138	64	55	0	19	29	76	0	200	2535	Bacteria{superkingdom}(89);Proteobacteria{phylum}(89);Alphaproteobacteria{class}(89);Sphingomonadales{order}(89);Sphingomonadaceae{family}(89);Novosphingobium{genus}(89);Unassigned{species}(0)	Bacteria	Proteobacteria	Alphaproteobacteria	Sphingomonadales	Sphingomonadaceae	Novosphingobium	Unassigned
ASV226	217	135	339	205	252	600	166	151	154	94	142	39	13	90	130	2727	Bacteria{superkingdom}(100);Chloroflexi{phylum}(100);Chloroflexia{class}(100);Kallotenuales{order}(100);Kallotenuaceae{family}(100);Kallotenue{genus}(100);uncultured_bacterium{species}(100)	Bacteria	Chloroflexi	Chloroflexia	Kallotenuales	Kallotenuaceae	Kallotenue	uncultured_bacterium
ASV227	150	54	171	140	168	0	0	20	57	0	0	20	0	0	0	780	Bacteria{superkingdom}(100);Actinobacteria{phylum}(100);Actinobacteria{class}(100);Actinomycetales{order}(100);Jiangellaceae{family}(100);Unassigned{genus}(0);Unassigned{species}(0)	Bacteria	Actinobacteria	Actinobacteria	Actinomycetales	Jiangellaceae	Unassigned	Unassigned
ASV228	172	21	122	308	174	48	42	49	17	49	41	0	88	61	53	1245	Bacteria{superkingdom}(92);Proteobacteria{phylum}(92);Alphaproteobacteria{class}(92);Rhizobiales{order}(92);Rhizobiaceae{family}(92);Neorhizobium{genus}(92);Unassigned{species}(0)	Bacteria	Proteobacteria	Alphaproteobacteria	Rhizobiales	Rhizobiaceae	Neorhizobium	Unassigned
ASV229	148	109	313	0	78	0	0	81	0	59	0	63	29	71	0	951	Bacteria{superkingdom}(100);Chloroflexi{phylum}(100);{class}(100);{order}(100);{family}(100);{genus}(100);uncultured_Anaerolineae_bacterium{species}(100)	Bacteria	Chloroflexi					uncultured_Anaerolineae_bacterium
ASV230	0	12	0	0	0	0	0	0	0	24	0	197	0	30	0	263	Bacteria{superkingdom}(100);Chloroflexi{phylum}(100);Chloroflexia{class}(100);Kallotenuales{order}(100);Kallotenuaceae{family}(100);Kallotenue{genus}(100);Unassigned{species}(0)	Bacteria	Chloroflexi	Chloroflexia	Kallotenuales	Kallotenuaceae	Kallotenue	Unassigned
ASV231	181	287	152	132	145	82	62	60	23	108	0	23	55	330	17	1657	Bacteria{superkingdom}(100);Actinobacteria{phylum}(100);Actinobacteria{class}(100);Acidimicrobiales{order}(100);Acidimicrobiaceae{family}(100);Ilumatobacter{genus}(100);Unassigned{species}(0)	Bacteria	Actinobacteria	Actinobacteria	Acidimicrobiales	Acidimicrobiaceae	Ilumatobacter	Unassigned
ASV232	0	0	0	81	0	0	0	0	0	0	0	0	0	0	0	81	Bacteria{superkingdom}(90);Actinobacteria{phylum}(90);Actinobacteria{class}(90);Actinomycetales{order}(90);Glycomycetaceae{family}(90);Glycomyces{genus}(90);Glycomyces_scopariae{species}(90)	Bacteria	Actinobacteria	Actinobacteria	Actinomycetales	Glycomycetaceae	Glycomyces	Glycomyces_scopariae
ASV233	174	13	0	397	52	203	58	545	414	42	419	31	318	18	14	2698	Bacteria{superkingdom}(87);Firmicutes{phylum}(87);Bacilli{class}(87);Bacillales{order}(87);Bacillaceae_1{family}(87);Domibacillus{genus}(87);uncultured_bacterium{species}(87)	Bacteria	Firmicutes	Bacilli	Bacillales	Bacillaceae_1	Domibacillus	uncultured_bacterium
ASV234	0	82	0	0	0	0	265	121	69	174	0	99	222	255	0	1287	Bacteria{superkingdom}(97);Acidobacteria{phylum}(97);Acidobacteria_Gp3{class}(97);{order}(97);{family}(97);Gp3{genus}(97);Unassigned{species}(0)	Bacteria	Acidobacteria	Acidobacteria_Gp3			Gp3	Unassigned
ASV235	62	0	57	35	0	42	38	88	42	72	0	83	24	52	85	680	Bacteria{superkingdom}(89);Actinobacteria{phylum}(89);Actinobacteria{class}(89);Solirubrobacterales{order}(89);Solirubrobacteraceae{family}(89);Solirubrobacter{genus}(89);Unassigned{species}(0)	Bacteria	Actinobacteria	Actinobacteria	Solirubrobacterales	Solirubrobacteraceae	Solirubrobacter	Unassigned
ASV236	0	238	43	0	0	0	0	112	0	57	0	0	0	0	0	450	Bacteria{superkingdom}(81);Chloroflexi{phylum}(81);Thermomicrobia{class}(81);Sphaerobacterales{order}(81);Sphaerobacteraceae{family}(81);Nitrolancea{genus}(81);Unassigned{species}(0)	Bacteria	Chloroflexi	Thermomicrobia	Sphaerobacterales	Sphaerobacteraceae	Nitrolancea	Unassigned
ASV237	0	0	0	0	50	0	0	0	0	0	0	0	0	45	0	95	Bacteria{superkingdom}(100);Acidobacteria{phylum}(100);Acidobacteria_Gp4{class}(100);{order}(100);{family}(100);Blastocatella{genus}(100);Unassigned{species}(0)	Bacteria	Acidobacteria	Acidobacteria_Gp4			Blastocatella	Unassigned
ASV238	71	0	42	63	162	607	496	476	389	196	139	152	13	238	262	3306	Bacteria{superkingdom}(100);Nitrospirae{phylum}(100);Nitrospira{class}(100);Nitrospirales{order}(100);Nitrospiraceae{family}(100);Nitrospira{genus}(100);Unassigned{species}(0)	Bacteria	Nitrospirae	Nitrospira	Nitrospirales	Nitrospiraceae	Nitrospira	Unassigned
ASV239	0	28	0	0	0	0	0	0	0	26	0	0	20	0	0	74	Bacteria{superkingdom}(100);Proteobacteria{phylum}(100);Alphaproteobacteria{class}(100);Rhizobiales{order}(100);Hyphomicrobiaceae{family}(100);Devosia{genus}(100);Unassigned{species}(0)	Bacteria	Proteobacteria	Alphaproteobacteria	Rhizobiales	Hyphomicrobiaceae	Devosia	Unassigned
ASV240	0	0	0	0	0	0	0	0	0	33	10	39	34	37	0	153	Bacteria{superkingdom}(92);Proteobacteria{phylum}(92);Alphaproteobacteria{class}(92);Rhizobiales{order}(92);{family}(92);{genus}(92);uncultured_endolithic_bacterium{species}(92)	Bacteria	Proteobacteria	Alphaproteobacteria	Rhizobiales			uncultured_endolithic_bacterium
ASV241	153	96	189	0	0	0	0	0	0	43	0	0	0	0	0	481	Bacteria{superkingdom}(99);Actinobacteria{phylum}(99);Actinobacteria{class}(99);Actinomycetales{order}(99);Streptomycetaceae{family}(99);Streptomyces{genus}(99);Unassigned{species}(0)	Bacteria	Actinobacteria	Actinobacteria	Actinomycetales	Streptomycetaceae	Streptomyces	Unassigned
ASV243	62	0	196	215	141	142	0	41	60	0	0	24	0	0	49	930	Bacteria{superkingdom}(94);Bacteroidetes{phylum}(94);Sphingobacteriia{class}(94);Sphingobacteriales{order}(94);Chitinophagaceae{family}(94);{genus}(94);uncultured_Cytophaga_sp.{species}(94)	Bacteria	Bacteroidetes	Sphingobacteriia	Sphingobacteriales	Chitinophagaceae		uncultured_Cytophaga_sp.
ASV244	191	177	253	135	192	66	112	56	97	147	198	0	113	29	42	1808	Bacteria{superkingdom}(100);Actinobacteria{phylum}(100);Actinobacteria{class}(100);Actinomycetales{order}(100);Nocardioidaceae{family}(100);Nocardioides{genus}(100);Unassigned{species}(0)	Bacteria	Actinobacteria	Actinobacteria	Actinomycetales	Nocardioidaceae	Nocardioides	Unassigned
ASV245	94	102	87	160	109	40	43	0	104	0	106	43	0	0	61	949	Bacteria{superkingdom}(100);Actinobacteria{phylum}(100);Actinobacteria{class}(100);Actinomycetales{order}(100);Micromonosporaceae{family}(100);Unassigned{genus}(0);Unassigned{species}(0)	Bacteria	Actinobacteria	Actinobacteria	Actinomycetales	Micromonosporaceae	Unassigned	Unassigned
ASV246	0	16	0	0	36	0	0	30	15	58	54	39	0	41	32	321	Bacteria{superkingdom}(93);Proteobacteria{phylum}(93);Alphaproteobacteria{class}(93);Rhizobiales{order}(93);Methylobacteriaceae{family}(93);Microvirga{genus}(93);uncultured_alpha_proteobacterium{species}(93)	Bacteria	Proteobacteria	Alphaproteobacteria	Rhizobiales	Methylobacteriaceae	Microvirga	uncultured_alpha_proteobacterium
ASV247	0	13	0	0	0	0	0	0	15	14	0	14	0	56	0	112	Bacteria{superkingdom}(97);Chloroflexi{phylum}(97);Chloroflexia{class}(97);Kallotenuales{order}(97);Kallotenuaceae{family}(97);Kallotenue{genus}(97);uncultured_endolithic_bacterium{species}(97)	Bacteria	Chloroflexi	Chloroflexia	Kallotenuales	Kallotenuaceae	Kallotenue	uncultured_endolithic_bacterium
ASV248	0	0	0	0	0	0	0	0	0	0	0	26	0	0	0	26	Bacteria{superkingdom}(100);Bacteroidetes{phylum}(100);Cytophagia{class}(100);Cytophagales{order}(100);Cytophagaceae{family}(100);Dyadobacter{genus}(100);Cytophagaceae_bacterium_PTR3{species}(100)	Bacteria	Bacteroidetes	Cytophagia	Cytophagales	Cytophagaceae	Dyadobacter	Cytophagaceae_bacterium_PTR3
ASV249	0	0	7	45	0	46	91	156	71	225	75	608	594	14	80	2012	Bacteria{superkingdom}(100);Actinobacteria{phylum}(100);Actinobacteria{class}(100);Actinomycetales{order}(100);Nocardioidaceae{family}(100);Nocardioides{genus}(100);Unassigned{species}(0)	Bacteria	Actinobacteria	Actinobacteria	Actinomycetales	Nocardioidaceae	Nocardioides	Unassigned
ASV250	9	0	7	14	0	0	0	43	42	37	0	129	33	52	10	376	Bacteria{superkingdom}(99);Actinobacteria{phylum}(99);Actinobacteria{class}(99);Actinomycetales{order}(99);Geodermatophilaceae{family}(99);Geodermatophilus{genus}(99);Unassigned{species}(0)	Bacteria	Actinobacteria	Actinobacteria	Actinomycetales	Geodermatophilaceae	Geodermatophilus	Unassigned
ASV251	0	0	0	68	80	399	229	321	79	311	278	307	0	88	500	2660	Bacteria{superkingdom}(98);Chloroflexi{phylum}(98);Anaerolineae{class}(98);Anaerolineales{order}(98);Anaerolineaceae{family}(98);{genus}(98);uncultured_soil_bacterium{species}(98)	Bacteria	Chloroflexi	Anaerolineae	Anaerolineales	Anaerolineaceae		uncultured_soil_bacterium
ASV252	0	14	0	0	26	0	0	0	0	0	0	0	0	0	0	40	Bacteria{superkingdom}(95);Acidobacteria{phylum}(95);Acidobacteria_Gp10{class}(95);{order}(95);{family}(95);Gp10{genus}(95);uncultured_Pelobacter_sp.{species}(95)	Bacteria	Acidobacteria	Acidobacteria_Gp10			Gp10	uncultured_Pelobacter_sp.
ASV253	240	106	296	142	112	310	500	110	166	138	14	0	124	21	154	2433	Bacteria{superkingdom}(97);Chloroflexi{phylum}(97);Anaerolineae{class}(97);Anaerolineales{order}(97);Anaerolineaceae{family}(97);{genus}(97);uncultured_soil_bacterium{species}(97)	Bacteria	Chloroflexi	Anaerolineae	Anaerolineales	Anaerolineaceae		uncultured_soil_bacterium
ASV254	24	158	0	0	0	0	0	0	0	0	9	0	0	38	0	229	Bacteria{superkingdom}(94);Acidobacteria{phylum}(94);Acidobacteria_Gp4{class}(94);{order}(94);{family}(94);Aridibacter{genus}(94);Unassigned{species}(0)	Bacteria	Acidobacteria	Acidobacteria_Gp4			Aridibacter	Unassigned
ASV256	0	0	0	0	0	8	17	20	49	35	9	131	66	39	16	390	Bacteria{superkingdom}(99);Actinobacteria{phylum}(99);Actinobacteria{class}(99);Acidimicrobiales{order}(99);{family}(99);{genus}(99);uncultured_organism{species}(99)	Bacteria	Actinobacteria	Actinobacteria	Acidimicrobiales			uncultured_organism
ASV257	151	0	0	66	0	32	34	316	18	19	0	132	63	43	6	880	Bacteria{superkingdom}(100);Firmicutes{phylum}(100);Bacilli{class}(100);Bacillales{order}(100);Bacillaceae_1{family}(100);Domibacillus{genus}(100);Unassigned{species}(0)	Bacteria	Firmicutes	Bacilli	Bacillales	Bacillaceae_1	Domibacillus	Unassigned
ASV258	36	72	51	72	0	0	35	127	45	58	0	54	41	80	25	696	Bacteria{superkingdom}(98);Acidobacteria{phylum}(98);Acidobacteria_Gp3{class}(98);{order}(98);{family}(98);Gp3{genus}(98);uncultured_Candidatus_Solibacter_sp.{species}(98)	Bacteria	Acidobacteria	Acidobacteria_Gp3			Gp3	uncultured_Candidatus_Solibacter_sp.
ASV259	0	0	0	0	0	0	0	0	0	0	0	134	0	0	0	134	Bacteria{superkingdom}(100);Proteobacteria{phylum}(100);Alphaproteobacteria{class}(100);Rhizobiales{order}(100);Hyphomicrobiaceae{family}(100);Devosia{genus}(100);Unassigned{species}(0)	Bacteria	Proteobacteria	Alphaproteobacteria	Rhizobiales	Hyphomicrobiaceae	Devosia	Unassigned
ASV260	81	162	177	53	0	0	0	550	26	0	42	89	0	0	0	1180	Bacteria{superkingdom}(100);Acidobacteria{phylum}(100);Acidobacteria_Gp10{class}(100);{order}(100);{family}(100);Gp10{genus}(100);Unassigned{species}(0)	Bacteria	Acidobacteria	Acidobacteria_Gp10			Gp10	Unassigned
ASV261	39	156	47	0	65	37	101	75	54	124	48	81	235	133	124	1319	Bacteria{superkingdom}(100);Proteobacteria{phylum}(100);Alphaproteobacteria{class}(100);Caulobacterales{order}(100);Caulobacteraceae{family}(100);{genus}(100);Unassigned{species}(0)	Bacteria	Proteobacteria	Alphaproteobacteria	Caulobacterales	Caulobacteraceae		Unassigned
ASV262	77	152	54	205	174	74	54	36	72	114	103	128	86	112	144	1585	Bacteria{superkingdom}(98);Proteobacteria{phylum}(98);Alphaproteobacteria{class}(98);Rhizobiales{order}(98);Bradyrhizobiaceae{family}(98);{genus}(98);Unassigned{species}(0)	Bacteria	Proteobacteria	Alphaproteobacteria	Rhizobiales	Bradyrhizobiaceae		Unassigned
ASV263	79	0	114	56	234	72	103	156	118	119	203	112	178	264	547	2355	Bacteria{superkingdom}(98);Acidobacteria{phylum}(98);Acidobacteria_Gp3{class}(98);{order}(98);{family}(98);Gp3{genus}(98);Unassigned{species}(0)	Bacteria	Acidobacteria	Acidobacteria_Gp3			Gp3	Unassigned
ASV264	92	49	78	95	441	0	204	59	52	23	49	8	0	0	35	1185	Bacteria{superkingdom}(83);Bacteroidetes{phylum}(83);Sphingobacteriia{class}(83);Sphingobacteriales{order}(83);Chitinophagaceae{family}(83);{genus}(83);Unassigned{species}(0)	Bacteria	Bacteroidetes	Sphingobacteriia	Sphingobacteriales	Chitinophagaceae		Unassigned
ASV265	51	0	0	6	0	0	0	0	0	0	0	0	0	0	0	57	Bacteria{superkingdom}(94);Chloroflexi{phylum}(94);Chloroflexia{class}(94);Kallotenuales{order}(94);Kallotenuaceae{family}(94);Kallotenue{genus}(94);uncultured_bacterium{species}(94)	Bacteria	Chloroflexi	Chloroflexia	Kallotenuales	Kallotenuaceae	Kallotenue	uncultured_bacterium
ASV266	0	10	0	0	0	0	0	0	0	16	0	39	16	0	0	81	Bacteria{superkingdom}(98);Proteobacteria{phylum}(98);Alphaproteobacteria{class}(98);Sphingomonadales{order}(98);Sphingomonadaceae{family}(98);Novosphingobium{genus}(98);Unassigned{species}(0)	Bacteria	Proteobacteria	Alphaproteobacteria	Sphingomonadales	Sphingomonadaceae	Novosphingobium	Unassigned
ASV267	153	323	283	179	217	0	37	60	11	148	0	40	0	66	0	1517	Bacteria{superkingdom}(100);Chloroflexi{phylum}(100);Thermomicrobia{class}(100);Sphaerobacterales{order}(100);Sphaerobacteraceae{family}(100);{genus}(100);Unassigned{species}(0)	Bacteria	Chloroflexi	Thermomicrobia	Sphaerobacterales	Sphaerobacteraceae		Unassigned
ASV268	125	64	70	25	21	196	216	78	54	107	43	134	3	14	79	1229	Bacteria{superkingdom}(84);Chloroflexi{phylum}(84);Chloroflexia{class}(84);{order}(84);{family}(84);{genus}(84);uncultured_bacterium{species}(84)	Bacteria	Chloroflexi	Chloroflexia				uncultured_bacterium
ASV269	90	51	241	23	618	0	18	27	0	0	0	0	0	0	0	1068	Bacteria{superkingdom}(100);Bacteroidetes{phylum}(100);Sphingobacteriia{class}(100);Sphingobacteriales{order}(100);Chitinophagaceae{family}(100);Unassigned{genus}(0);Unassigned{species}(0)	Bacteria	Bacteroidetes	Sphingobacteriia	Sphingobacteriales	Chitinophagaceae	Unassigned	Unassigned
ASV270	77	0	0	91	66	207	453	502	129	212	128	108	0	0	85	2058	Bacteria{superkingdom}(100);Acidobacteria{phylum}(100);Acidobacteria_Gp4{class}(100);{order}(100);{family}(100);Gp4{genus}(100);Unassigned{species}(0)	Bacteria	Acidobacteria	Acidobacteria_Gp4			Gp4	Unassigned
ASV271	71	237	33	131	52	0	63	0	0	42	0	95	0	82	0	806	Bacteria{superkingdom}(100);Acidobacteria{phylum}(100);Acidobacteria_Gp6{class}(100);{order}(100);{family}(100);Gp6{genus}(100);Unassigned{species}(0)	Bacteria	Acidobacteria	Acidobacteria_Gp6			Gp6	Unassigned
ASV272	86	22	65	99	71	125	127	114	196	388	75	111	300	112	993	2884	Bacteria{superkingdom}(93);Proteobacteria{phylum}(93);Betaproteobacteria{class}(93);Burkholderiales{order}(93);Comamonadaceae{family}(93);Ramlibacter{genus}(93);Unassigned{species}(0)	Bacteria	Proteobacteria	Betaproteobacteria	Burkholderiales	Comamonadaceae	Ramlibacter	Unassigned
ASV273	182	0	379	114	573	20	25	0	115	110	65	232	27	96	98	2036	Bacteria{superkingdom}(100);Actinobacteria{phylum}(100);Actinobacteria{class}(100);Unassigned{order}(0);Unassigned{family}(0);Unassigned{genus}(0);Unassigned{species}(0)	Bacteria	Actinobacteria	Actinobacteria	Unassigned	Unassigned	Unassigned	Unassigned
ASV274	32	0	74	176	80	0	0	0	30	0	0	0	0	0	0	392	Bacteria{superkingdom}(100);Bacteroidetes{phylum}(100);Sphingobacteriia{class}(100);Sphingobacteriales{order}(100);Chitinophagaceae{family}(100);Unassigned{genus}(0);Unassigned{species}(0)	Bacteria	Bacteroidetes	Sphingobacteriia	Sphingobacteriales	Chitinophagaceae	Unassigned	Unassigned
ASV275	196	0	119	58	63	52	136	140	119	48	88	8	0	103	36	1166	Bacteria{superkingdom}(85);{phylum}(85);{class}(85);{order}(85);{family}(85);{genus}(85);uncultured_Syntrophobacter_sp.{species}(85)	Bacteria						uncultured_Syntrophobacter_sp.
ASV276	72	0	22	16	22	0	0	78	36	57	0	223	167	97	97	887	Bacteria{superkingdom}(95);Actinobacteria{phylum}(95);Actinobacteria{class}(95);Actinomycetales{order}(95);Geodermatophilaceae{family}(95);Geodermatophilus{genus}(95);Unassigned{species}(0)	Bacteria	Actinobacteria	Actinobacteria	Actinomycetales	Geodermatophilaceae	Geodermatophilus	Unassigned
ASV278	80	65	0	118	69	842	406	194	177	458	0	0	0	44	104	2557	Bacteria{superkingdom}(100);Acidobacteria{phylum}(100);Acidobacteria_Gp4{class}(100);{order}(100);{family}(100);Gp4{genus}(100);Unassigned{species}(0)	Bacteria	Acidobacteria	Acidobacteria_Gp4			Gp4	Unassigned
ASV279	66	0	39	28	43	78	43	221	299	223	166	397	1638	72	265	3578	Bacteria{superkingdom}(100);{phylum}(100);{class}(100);{order}(100);{family}(100);{genus}(100);uncultured_Actinomyces_sp.{species}(100)	Bacteria						uncultured_Actinomyces_sp.
ASV280	227	35	140	43	35	156	107	19	151	65	143	36	130	104	197	1588	Bacteria{superkingdom}(100);Chloroflexi{phylum}(100);Caldilineae{class}(100);Caldilineales{order}(100);Caldilineaceae{family}(100);Litorilinea{genus}(100);uncultured_Litorilinea_sp.{species}(100)	Bacteria	Chloroflexi	Caldilineae	Caldilineales	Caldilineaceae	Litorilinea	uncultured_Litorilinea_sp.
ASV281	63	24	327	1189	961	0	0	301	300	0	0	0	0	0	0	3165	Bacteria{superkingdom}(81);Bacteroidetes{phylum}(81);Sphingobacteriia{class}(81);Sphingobacteriales{order}(81);Chitinophagaceae{family}(81);Niastella{genus}(81);Unassigned{species}(0)	Bacteria	Bacteroidetes	Sphingobacteriia	Sphingobacteriales	Chitinophagaceae	Niastella	Unassigned
ASV282	39	0	0	2	0	0	0	0	0	0	0	0	0	0	0	41	Bacteria{superkingdom}(94);Acidobacteria{phylum}(94);Acidobacteria_Gp10{class}(94);{order}(94);{family}(94);Gp10{genus}(94);uncultured_soil_bacterium{species}(94)	Bacteria	Acidobacteria	Acidobacteria_Gp10			Gp10	uncultured_soil_bacterium
ASV283	212	0	252	675	661	84	28	15	0	0	296	79	19	84	128	2533	Bacteria{superkingdom}(80);Bacteroidetes{phylum}(80);Sphingobacteriia{class}(80);Sphingobacteriales{order}(80);Chitinophagaceae{family}(80);Chitinophaga{genus}(80);uncultured_bacterium{species}(80)	Bacteria	Bacteroidetes	Sphingobacteriia	Sphingobacteriales	Chitinophagaceae	Chitinophaga	uncultured_bacterium
ASV285	147	640	58	160	64	287	144	287	131	94	407	650	0	387	492	3948	Bacteria{superkingdom}(100);Chloroflexi{phylum}(100);Anaerolineae{class}(100);Anaerolineales{order}(100);Anaerolineaceae{family}(100);{genus}(100);uncultured_soil_bacterium{species}(100)	Bacteria	Chloroflexi	Anaerolineae	Anaerolineales	Anaerolineaceae		uncultured_soil_bacterium
ASV286	301	0	397	444	614	82	25	26	31	0	210	0	0	0	168	2298	Bacteria{superkingdom}(100);Chloroflexi{phylum}(100);Thermomicrobia{class}(100);Unassigned{order}(0);Unassigned{family}(0);Unassigned{genus}(0);Unassigned{species}(0)	Bacteria	Chloroflexi	Thermomicrobia	Unassigned	Unassigned	Unassigned	Unassigned
ASV287	0	0	0	0	0	0	0	0	0	35	0	0	0	51	0	86	Bacteria{superkingdom}(100);Actinobacteria{phylum}(100);Actinobacteria{class}(100);Actinomycetales{order}(100);Micromonosporaceae{family}(100);Unassigned{genus}(0);Unassigned{species}(0)	Bacteria	Actinobacteria	Actinobacteria	Actinomycetales	Micromonosporaceae	Unassigned	Unassigned
ASV288	0	0	0	0	0	0	0	71	33	56	49	146	253	137	96	841	Bacteria{superkingdom}(100);Proteobacteria{phylum}(100);Betaproteobacteria{class}(100);{order}(100);{family}(100);{genus}(100);Unassigned{species}(0)	Bacteria	Proteobacteria	Betaproteobacteria				Unassigned
ASV289	68	0	82	272	184	45	0	0	70	0	124	0	0	0	47	892	Bacteria{superkingdom}(100);Acidobacteria{phylum}(100);Acidobacteria_Gp6{class}(100);{order}(100);{family}(100);Gp6{genus}(100);Unassigned{species}(0)	Bacteria	Acidobacteria	Acidobacteria_Gp6			Gp6	Unassigned
ASV290	0	77	20	0	0	59	42	48	54	66	52	63	137	122	84	824	Bacteria{superkingdom}(100);Proteobacteria{phylum}(100);Betaproteobacteria{class}(100);{order}(100);{family}(100);{genus}(100);Unassigned{species}(0)	Bacteria	Proteobacteria	Betaproteobacteria				Unassigned
ASV292	224	0	0	0	0	73	38	36	0	315	0	0	0	0	0	686	Bacteria{superkingdom}(100);Chloroflexi{phylum}(100);Chloroflexia{class}(100);{order}(100);{family}(100);{genus}(100);uncultured_Herpetosiphon_sp.{species}(100)	Bacteria	Chloroflexi	Chloroflexia				uncultured_Herpetosiphon_sp.
ASV293	138	97	187	89	82	50	67	52	100	128	9	0	8	39	36	1082	Bacteria{superkingdom}(100);Chloroflexi{phylum}(100);Chloroflexia{class}(100);{order}(100);{family}(100);{genus}(100);uncultured_soil_bacterium{species}(100)	Bacteria	Chloroflexi	Chloroflexia				uncultured_soil_bacterium
ASV294	0	0	0	0	0	0	0	0	20	9	0	52	0	22	0	103	Bacteria{superkingdom}(100);Chloroflexi{phylum}(100);Thermomicrobia{class}(100);Sphaerobacterales{order}(100);Sphaerobacteraceae{family}(100);{genus}(100);uncultured_Thermomicrobium_sp.{species}(100)	Bacteria	Chloroflexi	Thermomicrobia	Sphaerobacterales	Sphaerobacteraceae		uncultured_Thermomicrobium_sp.
ASV295	42	0	0	62	0	0	0	0	215	0	0	33	95	124	0	571	Bacteria{superkingdom}(100);Acidobacteria{phylum}(100);Acidobacteria_Gp7{class}(100);{order}(100);{family}(100);Gp7{genus}(100);Unassigned{species}(0)	Bacteria	Acidobacteria	Acidobacteria_Gp7			Gp7	Unassigned
ASV296	82	35	130	36	67	32	49	47	19	101	13	53	73	80	38	855	Bacteria{superkingdom}(100);Proteobacteria{phylum}(100);Alphaproteobacteria{class}(100);Rhizobiales{order}(100);Methylobacteriaceae{family}(100);Microvirga{genus}(100);Unassigned{species}(0)	Bacteria	Proteobacteria	Alphaproteobacteria	Rhizobiales	Methylobacteriaceae	Microvirga	Unassigned
ASV297	205	0	185	100	413	0	67	44	0	0	0	5	21	19	59	1118	Bacteria{superkingdom}(98);Bacteroidetes{phylum}(98);Cytophagia{class}(98);Cytophagales{order}(98);Cytophagaceae{family}(98);Dyadobacter{genus}(98);Dyadobacter_fermentans{species}(98)	Bacteria	Bacteroidetes	Cytophagia	Cytophagales	Cytophagaceae	Dyadobacter	Dyadobacter_fermentans
ASV298	100	41	131	83	398	66	49	109	128	77	144	547	258	353	195	2679	Bacteria{superkingdom}(84);Acidobacteria{phylum}(84);Acidobacteria_Gp3{class}(84);{order}(84);{family}(84);{genus}(84);uncultured_Bacillus_sp.{species}(84)	Bacteria	Acidobacteria	Acidobacteria_Gp3				uncultured_Bacillus_sp.
ASV299	0	115	0	0	0	0	15	0	0	10	0	0	0	0	0	140	Bacteria{superkingdom}(95);Actinobacteria{phylum}(95);Actinobacteria{class}(95);Actinomycetales{order}(95);Unassigned{family}(0);Unassigned{genus}(0);Unassigned{species}(0)	Bacteria	Actinobacteria	Actinobacteria	Actinomycetales	Unassigned	Unassigned	Unassigned
ASV300	244	220	160	0	50	0	0	0	0	0	0	0	0	0	0	674	Bacteria{superkingdom}(100);Actinobacteria{phylum}(100);Actinobacteria{class}(100);Actinomycetales{order}(100);Pseudonocardiaceae{family}(100);Unassigned{genus}(0);Unassigned{species}(0)	Bacteria	Actinobacteria	Actinobacteria	Actinomycetales	Pseudonocardiaceae	Unassigned	Unassigned
ASV301	13	116	0	10	0	27	0	41	31	259	90	131	265	254	791	2028	Bacteria{superkingdom}(90);Proteobacteria{phylum}(90);Alphaproteobacteria{class}(90);Sphingomonadales{order}(90);Sphingomonadaceae{family}(90);Novosphingobium{genus}(90);Unassigned{species}(0)	Bacteria	Proteobacteria	Alphaproteobacteria	Sphingomonadales	Sphingomonadaceae	Novosphingobium	Unassigned
ASV303	0	0	0	49	0	42	22	141	0	458	0	991	39	384	0	2126	Bacteria{superkingdom}(98);Actinobacteria{phylum}(98);Actinobacteria{class}(98);Actinomycetales{order}(98);Streptomycetaceae{family}(98);Streptomyces{genus}(98);Unassigned{species}(0)	Bacteria	Actinobacteria	Actinobacteria	Actinomycetales	Streptomycetaceae	Streptomyces	Unassigned
ASV304	24	14	107	621	507	0	29	195	51	0	0	0	0	0	0	1548	Bacteria{superkingdom}(81);Bacteroidetes{phylum}(81);Sphingobacteriia{class}(81);Sphingobacteriales{order}(81);Chitinophagaceae{family}(81);{genus}(81);uncultured_Cytophaga_sp.{species}(81)	Bacteria	Bacteroidetes	Sphingobacteriia	Sphingobacteriales	Chitinophagaceae		uncultured_Cytophaga_sp.
ASV305	77	90	70	61	212	503	252	192	117	308	157	17	30	16	116	2218	Bacteria{superkingdom}(100);Acidobacteria{phylum}(100);Acidobacteria_Gp6{class}(100);{order}(100);{family}(100);Gp6{genus}(100);Unassigned{species}(0)	Bacteria	Acidobacteria	Acidobacteria_Gp6			Gp6	Unassigned
ASV306	299	466	79	25	69	1119	586	89	57	206	0	0	0	0	0	2995	Bacteria{superkingdom}(99);Chloroflexi{phylum}(99);Unassigned{class}(0);Unassigned{order}(0);Unassigned{family}(0);Unassigned{genus}(0);Unassigned{species}(0)	Bacteria	Chloroflexi	Unassigned	Unassigned	Unassigned	Unassigned	Unassigned
ASV307	0	0	14	0	0	0	0	0	0	0	0	100	120	315	91	640	Bacteria{superkingdom}(100);Actinobacteria{phylum}(100);Actinobacteria{class}(100);Actinomycetales{order}(100);Microbacteriaceae{family}(100);Unassigned{genus}(0);Unassigned{species}(0)	Bacteria	Actinobacteria	Actinobacteria	Actinomycetales	Microbacteriaceae	Unassigned	Unassigned
ASV308	51	35	0	73	236	192	315	188	52	78	0	78	38	65	0	1401	Bacteria{superkingdom}(82);Bacteroidetes{phylum}(82);Sphingobacteriia{class}(82);Sphingobacteriales{order}(82);Chitinophagaceae{family}(82);{genus}(82);Unassigned{species}(0)	Bacteria	Bacteroidetes	Sphingobacteriia	Sphingobacteriales	Chitinophagaceae		Unassigned
ASV310	0	0	0	0	0	0	0	0	52	0	0	93	0	0	0	145	Bacteria{superkingdom}(100);Chloroflexi{phylum}(100);Chloroflexia{class}(100);Kallotenuales{order}(100);Kallotenuaceae{family}(100);Kallotenue{genus}(100);Unassigned{species}(0)	Bacteria	Chloroflexi	Chloroflexia	Kallotenuales	Kallotenuaceae	Kallotenue	Unassigned
ASV311	16	49	141	0	74	425	350	356	81	1062	535	401	382	146	577	4595	Bacteria{superkingdom}(100);Proteobacteria{phylum}(100);Alphaproteobacteria{class}(100);Rhodobacterales{order}(100);Rhodobacteraceae{family}(100);Rubellimicrobium{genus}(100);Unassigned{species}(0)	Bacteria	Proteobacteria	Alphaproteobacteria	Rhodobacterales	Rhodobacteraceae	Rubellimicrobium	Unassigned
ASV312	233	39	81	78	66	70	156	65	344	30	31	25	0	23	29	1270	Bacteria{superkingdom}(99);Proteobacteria{phylum}(99);Deltaproteobacteria{class}(99);{order}(99);{family}(99);{genus}(99);Unassigned{species}(0)	Bacteria	Proteobacteria	Deltaproteobacteria				Unassigned
ASV313	0	0	0	138	95	0	0	0	0	0	101	0	0	0	0	334	Bacteria{superkingdom}(100);Candidatus_Saccharibacteria{phylum}(100);{class}(100);{order}(100);{family}(100);Saccharibacteria_genera_incertae_sedis{genus}(100);Unassigned{species}(0)	Bacteria	Candidatus_Saccharibacteria				Saccharibacteria_genera_incertae_sedis	Unassigned
ASV314	0	0	0	0	0	18	0	0	0	65	0	0	0	0	0	83	Bacteria{superkingdom}(100);Actinobacteria{phylum}(100);Actinobacteria{class}(100);Solirubrobacterales{order}(100);Unassigned{family}(0);Unassigned{genus}(0);Unassigned{species}(0)	Bacteria	Actinobacteria	Actinobacteria	Solirubrobacterales	Unassigned	Unassigned	Unassigned
ASV315	0	0	0	0	0	0	0	0	0	0	0	30	0	24	0	54	Bacteria{superkingdom}(85);Bacteroidetes{phylum}(85);Cytophagia{class}(85);Cytophagales{order}(85);Cytophagaceae{family}(85);Adhaeribacter{genus}(85);uncultured_bacterium{species}(85)	Bacteria	Bacteroidetes	Cytophagia	Cytophagales	Cytophagaceae	Adhaeribacter	uncultured_bacterium
ASV316	86	0	123	588	102	0	0	0	0	0	24	44	0	39	0	1006	Bacteria{superkingdom}(100);Actinobacteria{phylum}(100);Actinobacteria{class}(100);Actinomycetales{order}(100);Nocardioidaceae{family}(100);Kribbella{genus}(100);Unassigned{species}(0)	Bacteria	Actinobacteria	Actinobacteria	Actinomycetales	Nocardioidaceae	Kribbella	Unassigned
ASV317	54	55	249	67	122	0	0	0	0	0	152	52	43	0	20	814	Bacteria{superkingdom}(100);Verrucomicrobia{phylum}(100);Opitutae{class}(100);Opitutales{order}(100);Opitutaceae{family}(100);Opitutus{genus}(100);Unassigned{species}(0)	Bacteria	Verrucomicrobia	Opitutae	Opitutales	Opitutaceae	Opitutus	Unassigned
ASV318	32	0	0	39	0	22	24	31	23	28	0	46	44	25	17	331	Bacteria{superkingdom}(98);Acidobacteria{phylum}(98);Acidobacteria_Gp4{class}(98);{order}(98);{family}(98);Aridibacter{genus}(98);uncultured_organism{species}(98)	Bacteria	Acidobacteria	Acidobacteria_Gp4			Aridibacter	uncultured_organism
ASV319	20	22	31	5	11	0	36	46	19	318	0	27	32	34	35	636	Bacteria{superkingdom}(97);Proteobacteria{phylum}(97);Betaproteobacteria{class}(97);Burkholderiales{order}(97);Oxalobacteraceae{family}(97);Massilia{genus}(97);Unassigned{species}(0)	Bacteria	Proteobacteria	Betaproteobacteria	Burkholderiales	Oxalobacteraceae	Massilia	Unassigned
ASV320	0	101	24	0	0	0	0	0	0	23	197	109	10	89	0	553	Bacteria{superkingdom}(100);Acidobacteria{phylum}(100);Acidobacteria_Gp10{class}(100);{order}(100);{family}(100);Gp10{genus}(100);Unassigned{species}(0)	Bacteria	Acidobacteria	Acidobacteria_Gp10			Gp10	Unassigned
ASV321	0	83	0	213	152	82	0	0	70	43	162	0	259	0	52	1116	Bacteria{superkingdom}(100);Proteobacteria{phylum}(100);Alphaproteobacteria{class}(100);Rhodospirillales{order}(100);Rhodospirillaceae{family}(100);Dongia{genus}(100);Unassigned{species}(0)	Bacteria	Proteobacteria	Alphaproteobacteria	Rhodospirillales	Rhodospirillaceae	Dongia	Unassigned
ASV322	0	0	0	77	0	0	0	0	0	0	0	0	0	0	0	77	Bacteria{superkingdom}(90);Proteobacteria{phylum}(90);Gammaproteobacteria{class}(90);Xanthomonadales{order}(90);Sinobacteraceae{family}(90);Steroidobacter{genus}(90);uncultured_gamma_proteobacterium{species}(90)	Bacteria	Proteobacteria	Gammaproteobacteria	Xanthomonadales	Sinobacteraceae	Steroidobacter	uncultured_gamma_proteobacterium
ASV323	0	0	0	0	0	0	0	101	0	35	0	0	0	59	0	195	Bacteria{superkingdom}(83);Actinobacteria{phylum}(83);Actinobacteria{class}(83);Rubrobacterales{order}(83);Rubrobacteraceae{family}(83);Rubrobacter{genus}(83);uncultured_bacterium{species}(83)	Bacteria	Actinobacteria	Actinobacteria	Rubrobacterales	Rubrobacteraceae	Rubrobacter	uncultured_bacterium
ASV324	0	123	2	47	8	1	13	73	18	97	0	15	52	25	7	481	Bacteria{superkingdom}(99);Chloroflexi{phylum}(99);Thermomicrobia{class}(99);Sphaerobacterales{order}(99);Sphaerobacteraceae{family}(99);Unassigned{genus}(0);Unassigned{species}(0)	Bacteria	Chloroflexi	Thermomicrobia	Sphaerobacterales	Sphaerobacteraceae	Unassigned	Unassigned
ASV325	137	111	51	310	190	0	13	69	21	0	0	0	0	0	27	929	Bacteria{superkingdom}(97);Proteobacteria{phylum}(97);Alphaproteobacteria{class}(97);Rhodospirillales{order}(97);Rhodospirillaceae{family}(97);Dongia{genus}(97);Unassigned{species}(0)	Bacteria	Proteobacteria	Alphaproteobacteria	Rhodospirillales	Rhodospirillaceae	Dongia	Unassigned
ASV326	133	155	43	41	0	160	108	130	62	54	0	91	57	131	66	1231	Bacteria{superkingdom}(100);Actinobacteria{phylum}(100);Actinobacteria{class}(100);Gaiellales{order}(100);Gaiellaceae{family}(100);Gaiella{genus}(100);Unassigned{species}(0)	Bacteria	Actinobacteria	Actinobacteria	Gaiellales	Gaiellaceae	Gaiella	Unassigned
ASV327	126	74	165	101	33	0	25	0	0	68	22	30	0	0	0	644	Bacteria{superkingdom}(85);Actinobacteria{phylum}(85);Actinobacteria{class}(85);Rubrobacterales{order}(85);Rubrobacteraceae{family}(85);Rubrobacter{genus}(85);uncultured_bacterium{species}(85)	Bacteria	Actinobacteria	Actinobacteria	Rubrobacterales	Rubrobacteraceae	Rubrobacter	uncultured_bacterium
ASV328	0	126	0	0	0	0	0	113	0	0	0	0	0	0	0	239	Bacteria{superkingdom}(100);Acidobacteria{phylum}(100);Acidobacteria_Gp4{class}(100);{order}(100);{family}(100);Gp4{genus}(100);Unassigned{species}(0)	Bacteria	Acidobacteria	Acidobacteria_Gp4			Gp4	Unassigned
ASV329	0	0	0	96	0	167	0	0	70	0	0	65	0	0	0	398	Bacteria{superkingdom}(100);Proteobacteria{phylum}(100);Gammaproteobacteria{class}(100);Xanthomonadales{order}(100);Sinobacteraceae{family}(100);Steroidobacter{genus}(100);Unassigned{species}(0)	Bacteria	Proteobacteria	Gammaproteobacteria	Xanthomonadales	Sinobacteraceae	Steroidobacter	Unassigned
ASV330	0	0	0	27	27	123	47	213	168	182	218	104	493	75	126	1803	Bacteria{superkingdom}(100);Proteobacteria{phylum}(100);Betaproteobacteria{class}(100);Burkholderiales{order}(100);Comamonadaceae{family}(100);Unassigned{genus}(0);Unassigned{species}(0)	Bacteria	Proteobacteria	Betaproteobacteria	Burkholderiales	Comamonadaceae	Unassigned	Unassigned
ASV331	157	211	164	14	112	319	283	171	79	109	213	11	0	209	57	2109	Bacteria{superkingdom}(80);Chloroflexi{phylum}(80);Thermomicrobia{class}(80);Sphaerobacterales{order}(80);Sphaerobacteraceae{family}(80);Nitrolancea{genus}(80);Unassigned{species}(0)	Bacteria	Chloroflexi	Thermomicrobia	Sphaerobacterales	Sphaerobacteraceae	Nitrolancea	Unassigned
ASV334	112	246	162	94	37	0	31	73	0	49	0	77	31	0	0	912	Bacteria{superkingdom}(100);Actinobacteria{phylum}(100);Actinobacteria{class}(100);Solirubrobacterales{order}(100);Solirubrobacteraceae{family}(100);Solirubrobacter{genus}(100);Unassigned{species}(0)	Bacteria	Actinobacteria	Actinobacteria	Solirubrobacterales	Solirubrobacteraceae	Solirubrobacter	Unassigned
ASV335	78	161	46	98	119	85	67	46	92	68	162	89	92	88	135	1426	Bacteria{superkingdom}(96);Proteobacteria{phylum}(96);Alphaproteobacteria{class}(96);Rhizobiales{order}(96);{family}(96);{genus}(96);Unassigned{species}(0)	Bacteria	Proteobacteria	Alphaproteobacteria	Rhizobiales			Unassigned
ASV336	101	50	65	169	29	0	0	0	0	0	96	0	0	0	0	510	Bacteria{superkingdom}(100);Proteobacteria{phylum}(100);Betaproteobacteria{class}(100);Burkholderiales{order}(100);Oxalobacteraceae{family}(100);Unassigned{genus}(0);Unassigned{species}(0)	Bacteria	Proteobacteria	Betaproteobacteria	Burkholderiales	Oxalobacteraceae	Unassigned	Unassigned
ASV337	23	0	16	292	156	0	0	17	5	12	0	19	0	11	0	551	Bacteria{superkingdom}(99);Proteobacteria{phylum}(99);Gammaproteobacteria{class}(99);Xanthomonadales{order}(99);Xanthomonadaceae{family}(99);Luteimonas{genus}(99);Unassigned{species}(0)	Bacteria	Proteobacteria	Gammaproteobacteria	Xanthomonadales	Xanthomonadaceae	Luteimonas	Unassigned
ASV338	105	4	53	312	476	94	33	0	0	33	229	0	0	0	66	1405	Bacteria{superkingdom}(100);Proteobacteria{phylum}(100);Gammaproteobacteria{class}(100);Xanthomonadales{order}(100);Xanthomonadaceae{family}(100);Pseudoxanthomonas{genus}(100);Unassigned{species}(0)	Bacteria	Proteobacteria	Gammaproteobacteria	Xanthomonadales	Xanthomonadaceae	Pseudoxanthomonas	Unassigned
ASV340	31	47	17	18	55	0	8	39	29	0	18	96	115	82	0	555	Bacteria{superkingdom}(100);Proteobacteria{phylum}(100);Gammaproteobacteria{class}(100);{order}(100);{family}(100);{genus}(100);Unassigned{species}(0)	Bacteria	Proteobacteria	Gammaproteobacteria				Unassigned
ASV341	0	98	15	0	14	65	19	84	56	71	24	70	268	81	73	938	Bacteria{superkingdom}(100);Proteobacteria{phylum}(100);Alphaproteobacteria{class}(100);Rhodospirillales{order}(100);Rhodospirillaceae{family}(100);Constrictibacter{genus}(100);uncultured_bacterium{species}(100)	Bacteria	Proteobacteria	Alphaproteobacteria	Rhodospirillales	Rhodospirillaceae	Constrictibacter	uncultured_bacterium
ASV342	105	409	154	44	73	0	24	46	18	0	0	0	0	0	0	873	Bacteria{superkingdom}(100);Actinobacteria{phylum}(100);Unassigned{class}(0);Unassigned{order}(0);Unassigned{family}(0);Unassigned{genus}(0);Unassigned{species}(0)	Bacteria	Actinobacteria	Unassigned	Unassigned	Unassigned	Unassigned	Unassigned
ASV343	0	34	0	0	0	47	0	55	125	159	119	1014	1026	59	0	2638	Bacteria{superkingdom}(90);Actinobacteria{phylum}(90);Actinobacteria{class}(90);Acidimicrobiales{order}(90);Acidimicrobineae_incertae_sedis{family}(90);Aciditerrimonas{genus}(90);Unassigned{species}(0)	Bacteria	Actinobacteria	Actinobacteria	Acidimicrobiales	Acidimicrobineae_incertae_sedis	Aciditerrimonas	Unassigned
ASV344	89	0	135	9	96	9	8	0	0	0	0	0	0	0	0	346	Bacteria{superkingdom}(100);Acidobacteria{phylum}(100);Acidobacteria_Gp6{class}(100);{order}(100);{family}(100);Gp6{genus}(100);Unassigned{species}(0)	Bacteria	Acidobacteria	Acidobacteria_Gp6			Gp6	Unassigned
ASV346	0	20	27	13	0	0	0	31	0	22	0	0	25	88	0	226	Bacteria{superkingdom}(99);Actinobacteria{phylum}(99);Actinobacteria{class}(99);Actinomycetales{order}(99);Geodermatophilaceae{family}(99);Geodermatophilus{genus}(99);Unassigned{species}(0)	Bacteria	Actinobacteria	Actinobacteria	Actinomycetales	Geodermatophilaceae	Geodermatophilus	Unassigned
ASV347	111	222	56	64	280	0	17	22	30	33	7	26	20	0	35	923	Bacteria{superkingdom}(98);Actinobacteria{phylum}(98);Actinobacteria{class}(98);Actinomycetales{order}(98);Nocardioidaceae{family}(98);Aeromicrobium{genus}(98);Unassigned{species}(0)	Bacteria	Actinobacteria	Actinobacteria	Actinomycetales	Nocardioidaceae	Aeromicrobium	Unassigned
ASV348	144	212	122	116	95	45	85	73	161	104	70	35	122	133	73	1590	Bacteria{superkingdom}(89);Actinobacteria{phylum}(89);Actinobacteria{class}(89);Acidimicrobiales{order}(89);Acidimicrobineae_incertae_sedis{family}(89);Aciditerrimonas{genus}(89);uncultured_Acidimicrobiales_bacterium{species}(89)	Bacteria	Actinobacteria	Actinobacteria	Acidimicrobiales	Acidimicrobineae_incertae_sedis	Aciditerrimonas	uncultured_Acidimicrobiales_bacterium
ASV349	0	0	0	0	0	0	0	0	0	0	0	0	15	0	0	15	Bacteria{superkingdom}(100);Acidobacteria{phylum}(100);Acidobacteria_Gp7{class}(100);{order}(100);{family}(100);Gp7{genus}(100);Unassigned{species}(0)	Bacteria	Acidobacteria	Acidobacteria_Gp7			Gp7	Unassigned
ASV350	19	73	10	43	0	0	0	58	16	49	0	53	12	87	14	434	Bacteria{superkingdom}(96);Actinobacteria{phylum}(96);Actinobacteria{class}(96);Actinomycetales{order}(96);Mycobacteriaceae{family}(96);Mycobacterium{genus}(96);Unassigned{species}(0)	Bacteria	Actinobacteria	Actinobacteria	Actinomycetales	Mycobacteriaceae	Mycobacterium	Unassigned
ASV351	86	67	366	167	270	0	0	0	47	0	73	0	0	0	0	1076	Bacteria{superkingdom}(94);Chloroflexi{phylum}(94);Thermomicrobia{class}(94);Sphaerobacterales{order}(94);Sphaerobacteraceae{family}(94);{genus}(94);Unassigned{species}(0)	Bacteria	Chloroflexi	Thermomicrobia	Sphaerobacterales	Sphaerobacteraceae		Unassigned
ASV353	0	0	0	15	0	0	0	40	22	60	0	99	59	205	42	542	Bacteria{superkingdom}(100);Proteobacteria{phylum}(100);Alphaproteobacteria{class}(100);Rhodospirillales{order}(100);Rhodospirillaceae{family}(100);Skermanella{genus}(100);Unassigned{species}(0)	Bacteria	Proteobacteria	Alphaproteobacteria	Rhodospirillales	Rhodospirillaceae	Skermanella	Unassigned
ASV354	58	61	26	11	18	37	168	184	42	146	9	18	14	132	103	1027	Bacteria{superkingdom}(98);Chloroflexi{phylum}(98);Chloroflexia{class}(98);{order}(98);{family}(98);{genus}(98);uncultured_soil_bacterium{species}(98)	Bacteria	Chloroflexi	Chloroflexia				uncultured_soil_bacterium
ASV355	0	18	0	0	0	20	42	13	20	123	0	0	0	52	14	302	Bacteria{superkingdom}(80);Proteobacteria{phylum}(80);Betaproteobacteria{class}(80);Burkholderiales{order}(80);Burkholderiaceae{family}(80);Lautropia{genus}(80);uncultured_Derxia_sp.{species}(80)	Bacteria	Proteobacteria	Betaproteobacteria	Burkholderiales	Burkholderiaceae	Lautropia	uncultured_Derxia_sp.
ASV356	0	0	0	106	0	0	0	0	0	0	0	0	0	0	0	106	Bacteria{superkingdom}(100);Actinobacteria{phylum}(100);Actinobacteria{class}(100);Actinomycetales{order}(100);Micromonosporaceae{family}(100);Unassigned{genus}(0);Unassigned{species}(0)	Bacteria	Actinobacteria	Actinobacteria	Actinomycetales	Micromonosporaceae	Unassigned	Unassigned
ASV358	0	0	0	150	0	0	0	0	0	68	0	0	0	274	0	492	Bacteria{superkingdom}(100);Actinobacteria{phylum}(100);Actinobacteria{class}(100);Actinomycetales{order}(100);Nocardioidaceae{family}(100);Kribbella{genus}(100);Unassigned{species}(0)	Bacteria	Actinobacteria	Actinobacteria	Actinomycetales	Nocardioidaceae	Kribbella	Unassigned
ASV359	0	58	0	18	0	15	0	17	0	41	36	183	195	224	0	787	Bacteria{superkingdom}(89);Bacteroidetes{phylum}(89);Sphingobacteriia{class}(89);Sphingobacteriales{order}(89);Chitinophagaceae{family}(89);Flavisolibacter{genus}(89);uncultured_Bacteroidetes_bacterium{species}(89)	Bacteria	Bacteroidetes	Sphingobacteriia	Sphingobacteriales	Chitinophagaceae	Flavisolibacter	uncultured_Bacteroidetes_bacterium
ASV360	175	0	185	369	225	26	0	0	61	0	51	26	332	0	91	1541	Bacteria{superkingdom}(96);Proteobacteria{phylum}(96);Alphaproteobacteria{class}(96);Rhizobiales{order}(96);Rhizobiaceae{family}(96);Rhizobium{genus}(96);Unassigned{species}(0)	Bacteria	Proteobacteria	Alphaproteobacteria	Rhizobiales	Rhizobiaceae	Rhizobium	Unassigned
ASV361	0	0	0	0	13	0	0	0	0	0	0	0	0	0	0	13	Bacteria{superkingdom}(82);Acidobacteria{phylum}(82);Acidobacteria_Gp4{class}(82);{order}(82);{family}(82);Blastocatella{genus}(82);Unassigned{species}(0)	Bacteria	Acidobacteria	Acidobacteria_Gp4			Blastocatella	Unassigned
ASV362	84	0	23	32	32	21	23	35	126	55	764	1318	36	286	1554	4389	Bacteria{superkingdom}(93);Actinobacteria{phylum}(93);Actinobacteria{class}(93);Solirubrobacterales{order}(93);Conexibacteraceae{family}(93);Conexibacter{genus}(93);Unassigned{species}(0)	Bacteria	Actinobacteria	Actinobacteria	Solirubrobacterales	Conexibacteraceae	Conexibacter	Unassigned
ASV363	92	18	0	84	0	0	0	94	111	13	0	137	74	52	78	753	Bacteria{superkingdom}(94);Planctomycetes{phylum}(94);Planctomycetia{class}(94);Planctomycetales{order}(94);Planctomycetaceae{family}(94);Pirellula{genus}(94);uncultured_Firmicutes_bacterium{species}(94)	Bacteria	Planctomycetes	Planctomycetia	Planctomycetales	Planctomycetaceae	Pirellula	uncultured_Firmicutes_bacterium
ASV364	0	0	109	0	0	0	0	0	0	0	0	0	0	0	0	109	Bacteria{superkingdom}(100);Acidobacteria{phylum}(100);Acidobacteria_Gp10{class}(100);{order}(100);{family}(100);Gp10{genus}(100);Unassigned{species}(0)	Bacteria	Acidobacteria	Acidobacteria_Gp10			Gp10	Unassigned
ASV366	33	34	0	48	58	0	0	33	13	73	0	27	0	0	0	319	Bacteria{superkingdom}(88);Bacteroidetes{phylum}(88);Cytophagia{class}(88);Cytophagales{order}(88);{family}(88);Chryseolinea{genus}(88);Unassigned{species}(0)	Bacteria	Bacteroidetes	Cytophagia	Cytophagales		Chryseolinea	Unassigned
ASV367	81	57	73	92	50	0	0	0	40	51	18	52	85	22	39	660	Bacteria{superkingdom}(100);Proteobacteria{phylum}(100);Alphaproteobacteria{class}(100);Caulobacterales{order}(100);Caulobacteraceae{family}(100);Phenylobacterium{genus}(100);Unassigned{species}(0)	Bacteria	Proteobacteria	Alphaproteobacteria	Caulobacterales	Caulobacteraceae	Phenylobacterium	Unassigned
ASV368	112	0	189	74	91	107	61	407	470	206	102	0	58	0	125	2002	Bacteria{superkingdom}(99);Proteobacteria{phylum}(99);Betaproteobacteria{class}(99);Burkholderiales{order}(99);Comamonadaceae{family}(99);Unassigned{genus}(0);Unassigned{species}(0)	Bacteria	Proteobacteria	Betaproteobacteria	Burkholderiales	Comamonadaceae	Unassigned	Unassigned
ASV369	0	47	0	0	0	0	0	18	0	34	0	25	24	48	9	205	Bacteria{superkingdom}(96);Proteobacteria{phylum}(96);Alphaproteobacteria{class}(96);Rhizobiales{order}(96);Methylobacteriaceae{family}(96);{genus}(96);uncultured_bacterium{species}(96)	Bacteria	Proteobacteria	Alphaproteobacteria	Rhizobiales	Methylobacteriaceae		uncultured_bacterium
ASV370	0	0	0	0	0	0	0	0	0	25	0	0	0	0	0	25	Bacteria{superkingdom}(100);Actinobacteria{phylum}(100);Actinobacteria{class}(100);Actinomycetales{order}(100);Propionibacteriaceae{family}(100);Friedmanniella{genus}(100);Unassigned{species}(0)	Bacteria	Actinobacteria	Actinobacteria	Actinomycetales	Propionibacteriaceae	Friedmanniella	Unassigned
ASV371	0	367	0	0	0	0	0	0	0	0	0	0	0	0	0	367	Bacteria{superkingdom}(100);Acidobacteria{phylum}(100);Acidobacteria_Gp4{class}(100);{order}(100);{family}(100);Gp4{genus}(100);Unassigned{species}(0)	Bacteria	Acidobacteria	Acidobacteria_Gp4			Gp4	Unassigned
ASV373	150	73	159	24	54	31	76	76	121	181	0	0	0	51	21	1017	Bacteria{superkingdom}(100);Actinobacteria{phylum}(100);Actinobacteria{class}(100);Actinomycetales{order}(100);Intrasporangiaceae{family}(100);Unassigned{genus}(0);Unassigned{species}(0)	Bacteria	Actinobacteria	Actinobacteria	Actinomycetales	Intrasporangiaceae	Unassigned	Unassigned
ASV374	293	26	26	0	144	180	110	306	55	115	68	51	213	126	229	1942	Bacteria{superkingdom}(94);Proteobacteria{phylum}(94);Betaproteobacteria{class}(94);Burkholderiales{order}(94);Comamonadaceae{family}(94);Ramlibacter{genus}(94);Unassigned{species}(0)	Bacteria	Proteobacteria	Betaproteobacteria	Burkholderiales	Comamonadaceae	Ramlibacter	Unassigned
ASV375	0	0	0	56	0	0	31	71	25	31	0	82	16	81	0	393	Bacteria{superkingdom}(95);Acidobacteria{phylum}(95);{class}(95);{order}(95);{family}(95);{genus}(95);uncultured_Geobacter_sp.{species}(95)	Bacteria	Acidobacteria					uncultured_Geobacter_sp.
ASV376	149	0	412	0	68	0	9	0	0	0	0	0	0	0	0	638	Bacteria{superkingdom}(91);{phylum}(91);{class}(91);{order}(91);{family}(91);{genus}(91);uncultured_Micromonospora_sp.{species}(91)	Bacteria						uncultured_Micromonospora_sp.
ASV377	0	74	0	0	0	0	0	45	0	0	0	0	0	0	0	119	Bacteria{superkingdom}(100);Acidobacteria{phylum}(100);Acidobacteria_Gp4{class}(100);{order}(100);{family}(100);Gp4{genus}(100);uncultured_Candidatus_Chloracidobacterium_sp.{species}(100)	Bacteria	Acidobacteria	Acidobacteria_Gp4			Gp4	uncultured_Candidatus_Chloracidobacterium_sp.
ASV379	6	19	5	0	0	0	4	70	0	0	0	50	0	96	0	250	Bacteria{superkingdom}(95);Actinobacteria{phylum}(95);Actinobacteria{class}(95);Actinomycetales{order}(95);Geodermatophilaceae{family}(95);Modestobacter{genus}(95);Unassigned{species}(0)	Bacteria	Actinobacteria	Actinobacteria	Actinomycetales	Geodermatophilaceae	Modestobacter	Unassigned
ASV380	32	0	66	42	104	14	5	0	82	0	119	0	0	0	24	488	Bacteria{superkingdom}(97);Bacteroidetes{phylum}(97);Cytophagia{class}(97);Cytophagales{order}(97);{family}(97);Chryseolinea{genus}(97);uncultured_Bacteroidetes_bacterium{species}(97)	Bacteria	Bacteroidetes	Cytophagia	Cytophagales		Chryseolinea	uncultured_Bacteroidetes_bacterium
ASV381	73	88	0	184	54	13	15	89	39	106	37	163	204	41	25	1131	Bacteria{superkingdom}(90);Bacteroidetes{phylum}(90);Cytophagia{class}(90);Cytophagales{order}(90);{family}(90);Ohtaekwangia{genus}(90);uncultured_Sphingobacteriales_bacterium{species}(90)	Bacteria	Bacteroidetes	Cytophagia	Cytophagales		Ohtaekwangia	uncultured_Sphingobacteriales_bacterium
ASV382	0	3	6	154	43	4	3	27	22	0	7	7	5	38	4	323	Bacteria{superkingdom}(100);Proteobacteria{phylum}(100);Gammaproteobacteria{class}(100);Xanthomonadales{order}(100);Sinobacteraceae{family}(100);Steroidobacter{genus}(100);Unassigned{species}(0)	Bacteria	Proteobacteria	Gammaproteobacteria	Xanthomonadales	Sinobacteraceae	Steroidobacter	Unassigned
ASV383	0	0	0	0	0	0	0	0	0	42	0	112	31	33	0	218	Bacteria{superkingdom}(81);Actinobacteria{phylum}(81);Actinobacteria{class}(81);Solirubrobacterales{order}(81);Conexibacteraceae{family}(81);Conexibacter{genus}(81);uncultured_bacterium{species}(81)	Bacteria	Actinobacteria	Actinobacteria	Solirubrobacterales	Conexibacteraceae	Conexibacter	uncultured_bacterium
ASV384	0	0	13	41	35	70	0	763	406	41	86	50	993	30	0	2528	Bacteria{superkingdom}(100);Bacteroidetes{phylum}(100);Sphingobacteriia{class}(100);Sphingobacteriales{order}(100);Chitinophagaceae{family}(100);Unassigned{genus}(0);Unassigned{species}(0)	Bacteria	Bacteroidetes	Sphingobacteriia	Sphingobacteriales	Chitinophagaceae	Unassigned	Unassigned
ASV385	0	0	12	12	54	0	0	0	0	0	0	83	41	34	0	236	Bacteria{superkingdom}(100);Planctomycetes{phylum}(100);Planctomycetia{class}(100);Planctomycetales{order}(100);Planctomycetaceae{family}(100);Pirellula{genus}(100);uncultured_soil_bacterium_PBS-81{species}(100)	Bacteria	Planctomycetes	Planctomycetia	Planctomycetales	Planctomycetaceae	Pirellula	uncultured_soil_bacterium_PBS-81
ASV386	0	43	0	0	0	0	0	38	0	15	0	64	10	0	11	181	Bacteria{superkingdom}(99);Proteobacteria{phylum}(99);Deltaproteobacteria{class}(99);Myxococcales{order}(99);Polyangiaceae{family}(99);{genus}(99);Unassigned{species}(0)	Bacteria	Proteobacteria	Deltaproteobacteria	Myxococcales	Polyangiaceae		Unassigned
ASV387	29	0	63	130	30	76	90	108	21	52	0	0	58	66	46	769	Bacteria{superkingdom}(99);Gemmatimonadetes{phylum}(99);Gemmatimonadetes{class}(99);Gemmatimonadales{order}(99);Gemmatimonadaceae{family}(99);Gemmatimonas{genus}(99);Unassigned{species}(0)	Bacteria	Gemmatimonadetes	Gemmatimonadetes	Gemmatimonadales	Gemmatimonadaceae	Gemmatimonas	Unassigned
ASV388	6	0	0	0	0	0	0	10	0	28	78	296	26	76	15	535	Bacteria{superkingdom}(100);Actinobacteria{phylum}(100);Actinobacteria{class}(100);Actinomycetales{order}(100);Pseudonocardiaceae{family}(100);Saccharothrix{genus}(100);Unassigned{species}(0)	Bacteria	Actinobacteria	Actinobacteria	Actinomycetales	Pseudonocardiaceae	Saccharothrix	Unassigned
ASV389	123	0	79	45	245	0	0	0	103	0	0	0	0	0	0	595	Bacteria{superkingdom}(87);Proteobacteria{phylum}(87);Deltaproteobacteria{class}(87);{order}(87);{family}(87);{genus}(87);uncultured_Acidobacteriales_bacterium{species}(87)	Bacteria	Proteobacteria	Deltaproteobacteria				uncultured_Acidobacteriales_bacterium
ASV390	0	0	90	116	79	0	0	0	0	0	1808	100	0	118	0	2311	Bacteria{superkingdom}(100);Acidobacteria{phylum}(100);Acidobacteria_Gp7{class}(100);{order}(100);{family}(100);Gp7{genus}(100);Unassigned{species}(0)	Bacteria	Acidobacteria	Acidobacteria_Gp7			Gp7	Unassigned
ASV392	0	0	0	0	0	0	9	0	0	0	0	16	0	0	0	25	Bacteria{superkingdom}(100);Bacteroidetes{phylum}(100);Cytophagia{class}(100);Cytophagales{order}(100);Cytophagaceae{family}(100);Dyadobacter{genus}(100);Cytophagaceae_bacterium_PTR3{species}(100)	Bacteria	Bacteroidetes	Cytophagia	Cytophagales	Cytophagaceae	Dyadobacter	Cytophagaceae_bacterium_PTR3
ASV393	25	167	0	0	0	0	0	101	0	98	0	20	0	126	0	537	Bacteria{superkingdom}(100);Actinobacteria{phylum}(100);Actinobacteria{class}(100);Actinomycetales{order}(100);Pseudonocardiaceae{family}(100);Pseudonocardia{genus}(100);Unassigned{species}(0)	Bacteria	Actinobacteria	Actinobacteria	Actinomycetales	Pseudonocardiaceae	Pseudonocardia	Unassigned
ASV394	0	0	0	0	0	0	0	0	0	0	0	25	0	0	0	25	Bacteria{superkingdom}(100);Proteobacteria{phylum}(100);Betaproteobacteria{class}(100);Nitrosomonadales{order}(100);Nitrosomonadaceae{family}(100);Nitrosomonas{genus}(100);Unassigned{species}(0)	Bacteria	Proteobacteria	Betaproteobacteria	Nitrosomonadales	Nitrosomonadaceae	Nitrosomonas	Unassigned
ASV395	100	90	36	59	24	40	38	70	28	80	57	106	61	30	76	895	Bacteria{superkingdom}(86);Actinobacteria{phylum}(86);Actinobacteria{class}(86);{order}(86);{family}(86);{genus}(86);Unassigned{species}(0)	Bacteria	Actinobacteria	Actinobacteria				Unassigned
ASV396	29	16	26	12	20	19	57	32	35	17	0	0	0	0	0	263	Bacteria{superkingdom}(100);Proteobacteria{phylum}(100);Alphaproteobacteria{class}(100);Unassigned{order}(0);Unassigned{family}(0);Unassigned{genus}(0);Unassigned{species}(0)	Bacteria	Proteobacteria	Alphaproteobacteria	Unassigned	Unassigned	Unassigned	Unassigned
ASV397	78	22	91	208	458	0	0	0	47	0	0	56	0	39	26	1025	Bacteria{superkingdom}(100);Bacteroidetes{phylum}(100);Sphingobacteriia{class}(100);Sphingobacteriales{order}(100);Chitinophagaceae{family}(100);Flavitalea{genus}(100);Unassigned{species}(0)	Bacteria	Bacteroidetes	Sphingobacteriia	Sphingobacteriales	Chitinophagaceae	Flavitalea	Unassigned
ASV398	32	136	59	27	50	28	61	35	52	0	26	22	72	34	31	665	Bacteria{superkingdom}(92);Chloroflexi{phylum}(92);Dehalococcoidia{class}(92);Dehalococcoidales{order}(92);Dehalococcoidaceae{family}(92);Dehalococcoides{genus}(92);uncultured_soil_bacterium{species}(92)	Bacteria	Chloroflexi	Dehalococcoidia	Dehalococcoidales	Dehalococcoidaceae	Dehalococcoides	uncultured_soil_bacterium
ASV399	58	102	31	155	291	0	13	10	33	51	30	0	0	0	163	937	Bacteria{superkingdom}(100);Bacteroidetes{phylum}(100);Cytophagia{class}(100);Cytophagales{order}(100);{family}(100);Chryseolinea{genus}(100);Unassigned{species}(0)	Bacteria	Bacteroidetes	Cytophagia	Cytophagales		Chryseolinea	Unassigned
ASV400	0	125	0	0	0	0	0	0	0	328	0	0	0	81	25	559	Bacteria{superkingdom}(100);Proteobacteria{phylum}(100);Alphaproteobacteria{class}(100);Sphingomonadales{order}(100);Sphingomonadaceae{family}(100);Unassigned{genus}(0);Unassigned{species}(0)	Bacteria	Proteobacteria	Alphaproteobacteria	Sphingomonadales	Sphingomonadaceae	Unassigned	Unassigned
ASV401	23	0	0	65	96	0	0	0	17	0	0	0	0	0	0	201	Bacteria{superkingdom}(92);Proteobacteria{phylum}(92);Gammaproteobacteria{class}(92);Xanthomonadales{order}(92);Sinobacteraceae{family}(92);Unassigned{genus}(0);Unassigned{species}(0)	Bacteria	Proteobacteria	Gammaproteobacteria	Xanthomonadales	Sinobacteraceae	Unassigned	Unassigned
ASV402	773	6	0	32	0	0	0	0	0	0	0	0	0	39	0	850	Bacteria{superkingdom}(86);Firmicutes{phylum}(86);Bacilli{class}(86);Bacillales{order}(86);Alicyclobacillaceae{family}(86);Tumebacillus{genus}(86);uncultured_bacterium{species}(86)	Bacteria	Firmicutes	Bacilli	Bacillales	Alicyclobacillaceae	Tumebacillus	uncultured_bacterium
ASV403	0	0	33	86	81	351	0	362	147	170	217	270	84	213	234	2248	Bacteria{superkingdom}(85);Proteobacteria{phylum}(85);Deltaproteobacteria{class}(85);{order}(85);{family}(85);{genus}(85);Alteromonas_sp._Gp-3-7.1{species}(85)	Bacteria	Proteobacteria	Deltaproteobacteria				Alteromonas_sp._Gp-3-7.1
ASV404	0	0	0	0	0	0	0	25	0	12	0	0	0	0	0	37	Bacteria{superkingdom}(98);Acidobacteria{phylum}(98);Acidobacteria_Gp4{class}(98);{order}(98);{family}(98);Gp4{genus}(98);uncultured_actinobacterium{species}(98)	Bacteria	Acidobacteria	Acidobacteria_Gp4			Gp4	uncultured_actinobacterium
ASV405	215	0	180	226	142	75	61	33	0	0	44	0	0	0	0	976	Bacteria{superkingdom}(99);Firmicutes{phylum}(99);Bacilli{class}(99);Bacillales{order}(99);Paenibacillaceae_1{family}(99);Paenibacillus{genus}(99);Unassigned{species}(0)	Bacteria	Firmicutes	Bacilli	Bacillales	Paenibacillaceae_1	Paenibacillus	Unassigned
ASV406	0	91	0	42	0	106	0	99	120	85	98	139	147	58	80	1065	Bacteria{superkingdom}(94);Verrucomicrobia{phylum}(94);Opitutae{class}(94);Opitutales{order}(94);Opitutaceae{family}(94);Opitutus{genus}(94);uncultured_Opitutaceae_bacterium{species}(94)	Bacteria	Verrucomicrobia	Opitutae	Opitutales	Opitutaceae	Opitutus	uncultured_Opitutaceae_bacterium
ASV408	0	0	0	0	0	0	0	0	0	0	0	19	0	0	0	19	Bacteria{superkingdom}(99);Bacteroidetes{phylum}(99);Cytophagia{class}(99);Cytophagales{order}(99);Cytophagaceae{family}(99);Rufibacter{genus}(99);uncultured_bacterium{species}(99)	Bacteria	Bacteroidetes	Cytophagia	Cytophagales	Cytophagaceae	Rufibacter	uncultured_bacterium
ASV409	0	0	0	0	0	0	0	0	24	114	20	0	0	0	0	158	Bacteria{superkingdom}(81);Proteobacteria{phylum}(81);Betaproteobacteria{class}(81);Burkholderiales{order}(81);Oxalobacteraceae{family}(81);Massilia{genus}(81);Massilia_dura{species}(81)	Bacteria	Proteobacteria	Betaproteobacteria	Burkholderiales	Oxalobacteraceae	Massilia	Massilia_dura
ASV410	0	0	182	0	0	0	0	59	19	0	0	0	0	0	0	260	Bacteria{superkingdom}(100);Acidobacteria{phylum}(100);Acidobacteria_Gp7{class}(100);{order}(100);{family}(100);Gp7{genus}(100);Unassigned{species}(0)	Bacteria	Acidobacteria	Acidobacteria_Gp7			Gp7	Unassigned
ASV411	43	41	68	98	80	60	124	151	51	74	0	0	0	29	41	860	Bacteria{superkingdom}(100);Gemmatimonadetes{phylum}(100);Gemmatimonadetes{class}(100);Gemmatimonadales{order}(100);Gemmatimonadaceae{family}(100);Gemmatimonas{genus}(100);Unassigned{species}(0)	Bacteria	Gemmatimonadetes	Gemmatimonadetes	Gemmatimonadales	Gemmatimonadaceae	Gemmatimonas	Unassigned
ASV412	75	0	142	157	51	0	0	0	0	0	0	0	0	0	0	425	Bacteria{superkingdom}(100);Proteobacteria{phylum}(100);Alphaproteobacteria{class}(100);Rhizobiales{order}(100);Rhizobiaceae{family}(100);Ensifer{genus}(100);Unassigned{species}(0)	Bacteria	Proteobacteria	Alphaproteobacteria	Rhizobiales	Rhizobiaceae	Ensifer	Unassigned
ASV413	0	0	0	0	0	0	0	0	0	84	0	15	36	108	25	268	Bacteria{superkingdom}(81);Bacteroidetes{phylum}(81);Sphingobacteriia{class}(81);Sphingobacteriales{order}(81);Chitinophagaceae{family}(81);Flavisolibacter{genus}(81);Unassigned{species}(0)	Bacteria	Bacteroidetes	Sphingobacteriia	Sphingobacteriales	Chitinophagaceae	Flavisolibacter	Unassigned
ASV415	0	0	0	0	99	141	111	50	0	159	0	0	0	0	0	560	Bacteria{superkingdom}(100);Proteobacteria{phylum}(100);Betaproteobacteria{class}(100);{order}(100);{family}(100);{genus}(100);Unassigned{species}(0)	Bacteria	Proteobacteria	Betaproteobacteria				Unassigned
ASV416	0	0	0	0	0	0	0	0	0	15	0	0	0	0	0	15	Bacteria{superkingdom}(100);Proteobacteria{phylum}(100);Alphaproteobacteria{class}(100);Rhizobiales{order}(100);{family}(100);{genus}(100);uncultured_endolithic_bacterium{species}(100)	Bacteria	Proteobacteria	Alphaproteobacteria	Rhizobiales			uncultured_endolithic_bacterium
ASV417	0	0	0	0	0	0	0	0	0	0	0	11	0	0	0	11	Bacteria{superkingdom}(100);Bacteroidetes{phylum}(100);Cytophagia{class}(100);Cytophagales{order}(100);Cytophagaceae{family}(100);Adhaeribacter{genus}(100);Unassigned{species}(0)	Bacteria	Bacteroidetes	Cytophagia	Cytophagales	Cytophagaceae	Adhaeribacter	Unassigned
ASV418	0	0	0	36	0	93	107	120	84	63	58	28	82	0	61	732	Bacteria{superkingdom}(98);Acidobacteria{phylum}(98);Acidobacteria_Gp6{class}(98);{order}(98);{family}(98);Gp6{genus}(98);Unassigned{species}(0)	Bacteria	Acidobacteria	Acidobacteria_Gp6			Gp6	Unassigned
ASV420	0	118	0	0	0	62	0	85	0	0	0	0	0	0	0	265	Bacteria{superkingdom}(100);Acidobacteria{phylum}(100);Acidobacteria_Gp6{class}(100);{order}(100);{family}(100);Gp6{genus}(100);Unassigned{species}(0)	Bacteria	Acidobacteria	Acidobacteria_Gp6			Gp6	Unassigned
ASV421	0	0	0	0	0	0	0	0	0	0	0	15	0	0	0	15	Bacteria{superkingdom}(100);Chloroflexi{phylum}(100);Chloroflexia{class}(100);Kallotenuales{order}(100);Kallotenuaceae{family}(100);Kallotenue{genus}(100);uncultured_bacterium{species}(100)	Bacteria	Chloroflexi	Chloroflexia	Kallotenuales	Kallotenuaceae	Kallotenue	uncultured_bacterium
ASV422	20	25	0	0	28	0	0	38	9	33	11	120	42	122	0	448	Bacteria{superkingdom}(97);Proteobacteria{phylum}(97);Alphaproteobacteria{class}(97);Rhizobiales{order}(97);Xanthobacteraceae{family}(97);Pseudolabrys{genus}(97);Unassigned{species}(0)	Bacteria	Proteobacteria	Alphaproteobacteria	Rhizobiales	Xanthobacteraceae	Pseudolabrys	Unassigned
ASV424	0	0	0	0	0	0	0	27	14	42	0	0	35	41	5	164	Bacteria{superkingdom}(100);Chloroflexi{phylum}(100);Caldilineae{class}(100);Caldilineales{order}(100);Caldilineaceae{family}(100);{genus}(100);Unassigned{species}(0)	Bacteria	Chloroflexi	Caldilineae	Caldilineales	Caldilineaceae		Unassigned
ASV425	106	59	115	66	41	125	47	96	167	262	237	228	3	133	240	1925	Bacteria{superkingdom}(82);Proteobacteria{phylum}(82);Alphaproteobacteria{class}(82);Rhodospirillales{order}(82);Rhodospirillaceae{family}(82);{genus}(82);Unassigned{species}(0)	Bacteria	Proteobacteria	Alphaproteobacteria	Rhodospirillales	Rhodospirillaceae		Unassigned
ASV426	113	0	15	0	619	13	0	0	0	0	0	0	0	0	0	760	Bacteria{superkingdom}(100);Bacteroidetes{phylum}(100);Cytophagia{class}(100);Cytophagales{order}(100);{family}(100);Ohtaekwangia{genus}(100);Unassigned{species}(0)	Bacteria	Bacteroidetes	Cytophagia	Cytophagales		Ohtaekwangia	Unassigned
ASV427	0	0	0	0	0	0	0	0	0	0	0	46	0	0	0	46	Bacteria{superkingdom}(100);Actinobacteria{phylum}(100);Actinobacteria{class}(100);Actinomycetales{order}(100);Pseudonocardiaceae{family}(100);Actinomycetospora{genus}(100);Unassigned{species}(0)	Bacteria	Actinobacteria	Actinobacteria	Actinomycetales	Pseudonocardiaceae	Actinomycetospora	Unassigned
ASV428	0	118	0	49	0	0	0	70	0	0	0	75	0	0	0	312	Bacteria{superkingdom}(100);Acidobacteria{phylum}(100);Acidobacteria_Gp4{class}(100);{order}(100);{family}(100);Gp4{genus}(100);Unassigned{species}(0)	Bacteria	Acidobacteria	Acidobacteria_Gp4			Gp4	Unassigned
ASV429	40	0	35	106	29	24	130	161	458	72	39	47	80	20	17	1258	Bacteria{superkingdom}(96);{phylum}(96);{class}(96);{order}(96);{family}(96);{genus}(96);Unassigned{species}(0)	Bacteria						Unassigned
ASV430	10	0	137	741	318	0	0	0	199	10	0	0	0	0	0	1415	Bacteria{superkingdom}(100);Actinobacteria{phylum}(100);Actinobacteria{class}(100);Actinomycetales{order}(100);Streptosporangiaceae{family}(100);Nonomuraea{genus}(100);Unassigned{species}(0)	Bacteria	Actinobacteria	Actinobacteria	Actinomycetales	Streptosporangiaceae	Nonomuraea	Unassigned
ASV431	155	21	116	27	84	31	40	24	57	0	13	8	11	35	6	628	Bacteria{superkingdom}(99);Chloroflexi{phylum}(99);Caldilineae{class}(99);Caldilineales{order}(99);Caldilineaceae{family}(99);{genus}(99);uncultured_Chloroflexi_bacterium{species}(99)	Bacteria	Chloroflexi	Caldilineae	Caldilineales	Caldilineaceae		uncultured_Chloroflexi_bacterium
ASV432	119	50	32	15	0	0	87	0	184	156	436	743	37	188	154	2201	Bacteria{superkingdom}(100);Proteobacteria{phylum}(100);Betaproteobacteria{class}(100);Nitrosomonadales{order}(100);Nitrosomonadaceae{family}(100);Nitrosospira{genus}(100);Unassigned{species}(0)	Bacteria	Proteobacteria	Betaproteobacteria	Nitrosomonadales	Nitrosomonadaceae	Nitrosospira	Unassigned
ASV433	0	0	0	25	0	0	0	46	0	35	0	0	0	0	0	106	Bacteria{superkingdom}(81);Acidobacteria{phylum}(81);Acidobacteria_Gp4{class}(81);{order}(81);{family}(81);Gp4{genus}(81);uncultured_Candidatus_Chloracidobacterium_sp.{species}(81)	Bacteria	Acidobacteria	Acidobacteria_Gp4			Gp4	uncultured_Candidatus_Chloracidobacterium_sp.
ASV434	0	0	0	0	0	0	11	1644	0	156	0	0	0	0	0	1811	Bacteria{superkingdom}(80);Acidobacteria{phylum}(80);Acidobacteria_Gp4{class}(80);{order}(80);{family}(80);Gp4{genus}(80);uncultured_Acidobacteriaceae_bacterium{species}(80)	Bacteria	Acidobacteria	Acidobacteria_Gp4			Gp4	uncultured_Acidobacteriaceae_bacterium
ASV435	14	0	208	257	54	172	8	13	659	40	308	0	0	0	2	1735	Bacteria{superkingdom}(94);Firmicutes{phylum}(94);Bacilli{class}(94);Bacillales{order}(94);Bacillaceae_1{family}(94);Bacillus{genus}(94);Unassigned{species}(0)	Bacteria	Firmicutes	Bacilli	Bacillales	Bacillaceae_1	Bacillus	Unassigned
ASV436	182	0	0	0	44	22	0	0	0	64	0	21	33	56	10	432	Bacteria{superkingdom}(100);Actinobacteria{phylum}(100);Actinobacteria{class}(100);Actinomycetales{order}(100);Microbacteriaceae{family}(100);Microbacterium{genus}(100);Unassigned{species}(0)	Bacteria	Actinobacteria	Actinobacteria	Actinomycetales	Microbacteriaceae	Microbacterium	Unassigned
ASV437	0	17	0	17	8	0	0	0	0	0	0	0	0	0	0	42	Bacteria{superkingdom}(99);Actinobacteria{phylum}(99);Actinobacteria{class}(99);Acidimicrobiales{order}(99);{family}(99);{genus}(99);uncultured_organism{species}(99)	Bacteria	Actinobacteria	Actinobacteria	Acidimicrobiales			uncultured_organism
ASV438	44	27	0	48	18	0	58	134	0	62	0	0	0	0	12	403	Bacteria{superkingdom}(85);Chloroflexi{phylum}(85);Chloroflexia{class}(85);{order}(85);{family}(85);{genus}(85);uncultured_Chloroflexi_bacterium{species}(85)	Bacteria	Chloroflexi	Chloroflexia				uncultured_Chloroflexi_bacterium
ASV439	16	117	0	30	25	11	12	49	26	55	19	120	133	142	60	815	Bacteria{superkingdom}(100);Acidobacteria{phylum}(100);Acidobacteria_Gp6{class}(100);{order}(100);{family}(100);Gp6{genus}(100);Unassigned{species}(0)	Bacteria	Acidobacteria	Acidobacteria_Gp6			Gp6	Unassigned
ASV440	62	44	86	63	0	55	0	36	91	60	50	407	617	59	142	1772	Bacteria{superkingdom}(100);Actinobacteria{phylum}(100);Actinobacteria{class}(100);Acidimicrobiales{order}(100);Unassigned{family}(0);Unassigned{genus}(0);Unassigned{species}(0)	Bacteria	Actinobacteria	Actinobacteria	Acidimicrobiales	Unassigned	Unassigned	Unassigned
ASV441	440	152	614	0	266	0	0	0	0	0	0	0	0	0	0	1472	Bacteria{superkingdom}(99);Chloroflexi{phylum}(99);{class}(99);{order}(99);{family}(99);{genus}(99);uncultured_Anaerolineae_bacterium{species}(99)	Bacteria	Chloroflexi					uncultured_Anaerolineae_bacterium
ASV442	0	0	116	0	60	25	211	0	51	159	0	0	0	0	0	622	Bacteria{superkingdom}(100);Planctomycetes{phylum}(100);Planctomycetia{class}(100);Planctomycetales{order}(100);Planctomycetaceae{family}(100);Pirellula{genus}(100);Unassigned{species}(0)	Bacteria	Planctomycetes	Planctomycetia	Planctomycetales	Planctomycetaceae	Pirellula	Unassigned
ASV443	25	0	18	36	20	105	45	41	175	96	0	117	0	0	9	687	Bacteria{superkingdom}(100);Actinobacteria{phylum}(100);Actinobacteria{class}(100);Actinomycetales{order}(100);Micromonosporaceae{family}(100);Unassigned{genus}(0);Unassigned{species}(0)	Bacteria	Actinobacteria	Actinobacteria	Actinomycetales	Micromonosporaceae	Unassigned	Unassigned
ASV444	120	59	80	90	228	0	13	13	9	26	51	28	10	24	14	765	Bacteria{superkingdom}(100);Actinobacteria{phylum}(100);Actinobacteria{class}(100);Acidimicrobiales{order}(100);Iamiaceae{family}(100);Iamia{genus}(100);uncultured_bacterium{species}(100)	Bacteria	Actinobacteria	Actinobacteria	Acidimicrobiales	Iamiaceae	Iamia	uncultured_bacterium
ASV445	24	35	23	63	97	6	0	0	0	35	0	0	0	120	0	403	Bacteria{superkingdom}(83);Acidobacteria{phylum}(83);Acidobacteria_Gp3{class}(83);{order}(83);{family}(83);{genus}(83);uncultured_Candidatus_Solibacter_sp.{species}(83)	Bacteria	Acidobacteria	Acidobacteria_Gp3				uncultured_Candidatus_Solibacter_sp.
ASV446	42	275	33	67	32	73	65	107	129	149	78	66	200	40	62	1418	Bacteria{superkingdom}(84);Proteobacteria{phylum}(84);Betaproteobacteria{class}(84);{order}(84);{family}(84);{genus}(84);uncultured_Burkholderiaceae_bacterium{species}(84)	Bacteria	Proteobacteria	Betaproteobacteria				uncultured_Burkholderiaceae_bacterium
ASV447	0	0	0	3	267	0	0	0	14	0	0	5	0	0	0	289	Bacteria{superkingdom}(85);Bacteroidetes{phylum}(85);Sphingobacteriia{class}(85);Sphingobacteriales{order}(85);Sphingobacteriaceae{family}(85);Parapedobacter{genus}(85);uncultured_bacterium{species}(85)	Bacteria	Bacteroidetes	Sphingobacteriia	Sphingobacteriales	Sphingobacteriaceae	Parapedobacter	uncultured_bacterium
ASV448	101	16	22	46	387	106	38	24	99	96	141	45	203	0	76	1400	Bacteria{superkingdom}(100);Acidobacteria{phylum}(100);Acidobacteria_Gp6{class}(100);{order}(100);{family}(100);Gp6{genus}(100);Unassigned{species}(0)	Bacteria	Acidobacteria	Acidobacteria_Gp6			Gp6	Unassigned
ASV449	0	0	0	0	0	0	0	0	0	0	0	49	0	0	0	49	Bacteria{superkingdom}(94);Acidobacteria{phylum}(94);Acidobacteria_Gp3{class}(94);{order}(94);{family}(94);Gp3{genus}(94);Unassigned{species}(0)	Bacteria	Acidobacteria	Acidobacteria_Gp3			Gp3	Unassigned
ASV450	55	416	101	69	16	230	108	51	117	169	41	46	0	0	83	1502	Bacteria{superkingdom}(95);Proteobacteria{phylum}(95);Betaproteobacteria{class}(95);{order}(95);{family}(95);{genus}(95);Unassigned{species}(0)	Bacteria	Proteobacteria	Betaproteobacteria				Unassigned
ASV451	75	141	164	78	62	307	47	0	399	0	0	0	0	38	132	1443	Bacteria{superkingdom}(100);Actinobacteria{phylum}(100);Unassigned{class}(0);Unassigned{order}(0);Unassigned{family}(0);Unassigned{genus}(0);Unassigned{species}(0)	Bacteria	Actinobacteria	Unassigned	Unassigned	Unassigned	Unassigned	Unassigned
ASV452	0	0	0	0	0	0	0	0	19	30	0	0	0	0	0	49	Bacteria{superkingdom}(93);Actinobacteria{phylum}(93);Actinobacteria{class}(93);Actinomycetales{order}(93);Geodermatophilaceae{family}(93);Modestobacter{genus}(93);Unassigned{species}(0)	Bacteria	Actinobacteria	Actinobacteria	Actinomycetales	Geodermatophilaceae	Modestobacter	Unassigned
ASV453	9	21	18	0	13	262	190	232	159	176	167	58	202	20	159	1686	Bacteria{superkingdom}(100);Unassigned{phylum}(0);Unassigned{class}(0);Unassigned{order}(0);Unassigned{family}(0);Unassigned{genus}(0);Unassigned{species}(0)	Bacteria	Unassigned	Unassigned	Unassigned	Unassigned	Unassigned	Unassigned
ASV454	69	296	0	0	0	0	0	159	0	0	9	0	620	0	0	1153	Bacteria{superkingdom}(100);Actinobacteria{phylum}(100);Unassigned{class}(0);Unassigned{order}(0);Unassigned{family}(0);Unassigned{genus}(0);Unassigned{species}(0)	Bacteria	Actinobacteria	Unassigned	Unassigned	Unassigned	Unassigned	Unassigned
ASV456	42	11	176	223	132	0	0	0	0	0	0	0	0	0	13	597	Bacteria{superkingdom}(100);Proteobacteria{phylum}(100);Alphaproteobacteria{class}(100);Rhizobiales{order}(100);Hyphomicrobiaceae{family}(100);Devosia{genus}(100);Unassigned{species}(0)	Bacteria	Proteobacteria	Alphaproteobacteria	Rhizobiales	Hyphomicrobiaceae	Devosia	Unassigned
ASV457	16	14	16	0	31	32	92	107	40	135	85	49	273	112	52	1054	Bacteria{superkingdom}(92);Proteobacteria{phylum}(92);Betaproteobacteria{class}(92);Burkholderiales{order}(92);Comamonadaceae{family}(92);Ramlibacter{genus}(92);Unassigned{species}(0)	Bacteria	Proteobacteria	Betaproteobacteria	Burkholderiales	Comamonadaceae	Ramlibacter	Unassigned
ASV459	43	50	38	62	81	118	117	73	97	137	157	128	188	80	214	1583	Bacteria{superkingdom}(100);Proteobacteria{phylum}(100);Alphaproteobacteria{class}(100);Rhizobiales{order}(100);Hyphomicrobiaceae{family}(100);Unassigned{genus}(0);Unassigned{species}(0)	Bacteria	Proteobacteria	Alphaproteobacteria	Rhizobiales	Hyphomicrobiaceae	Unassigned	Unassigned
ASV460	0	0	0	0	0	0	0	0	0	0	0	0	0	7	0	7	Bacteria{superkingdom}(99);Bacteroidetes{phylum}(99);Cytophagia{class}(99);Cytophagales{order}(99);Cytophagaceae{family}(99);Rufibacter{genus}(99);uncultured_bacterium{species}(99)	Bacteria	Bacteroidetes	Cytophagia	Cytophagales	Cytophagaceae	Rufibacter	uncultured_bacterium
ASV461	62	0	90	0	153	38	0	0	0	0	0	0	0	0	0	343	Bacteria{superkingdom}(100);Proteobacteria{phylum}(100);Alphaproteobacteria{class}(100);Rhizobiales{order}(100);Rhizobiaceae{family}(100);Ensifer{genus}(100);Unassigned{species}(0)	Bacteria	Proteobacteria	Alphaproteobacteria	Rhizobiales	Rhizobiaceae	Ensifer	Unassigned
ASV462	0	0	0	46	98	0	82	29	0	0	155	0	0	0	0	410	Bacteria{superkingdom}(100);Acidobacteria{phylum}(100);Acidobacteria_Gp4{class}(100);{order}(100);{family}(100);Gp4{genus}(100);Unassigned{species}(0)	Bacteria	Acidobacteria	Acidobacteria_Gp4			Gp4	Unassigned
ASV463	260	0	7	0	5	0	575	471	112	0	0	0	0	0	0	1430	Bacteria{superkingdom}(100);Chloroflexi{phylum}(100);Anaerolineae{class}(100);Anaerolineales{order}(100);Anaerolineaceae{family}(100);{genus}(100);uncultured_Gemmatimonadetes_bacterium{species}(100)	Bacteria	Chloroflexi	Anaerolineae	Anaerolineales	Anaerolineaceae		uncultured_Gemmatimonadetes_bacterium
ASV466	59	0	112	60	12	345	107	0	186	58	85	30	0	11	67	1132	Bacteria{superkingdom}(100);Planctomycetes{phylum}(100);Planctomycetia{class}(100);Planctomycetales{order}(100);Planctomycetaceae{family}(100);Unassigned{genus}(0);Unassigned{species}(0)	Bacteria	Planctomycetes	Planctomycetia	Planctomycetales	Planctomycetaceae	Unassigned	Unassigned
ASV467	0	192	0	0	0	244	95	104	0	60	0	0	0	79	0	774	Bacteria{superkingdom}(100);Bacteroidetes{phylum}(100);Sphingobacteriia{class}(100);Sphingobacteriales{order}(100);Chitinophagaceae{family}(100);Unassigned{genus}(0);Unassigned{species}(0)	Bacteria	Bacteroidetes	Sphingobacteriia	Sphingobacteriales	Chitinophagaceae	Unassigned	Unassigned
ASV468	0	45	0	0	0	0	0	2	0	0	0	0	0	0	2	49	Bacteria{superkingdom}(95);Actinobacteria{phylum}(95);Actinobacteria{class}(95);{order}(95);{family}(95);{genus}(95);uncultured_Actinomycetales_bacterium{species}(95)	Bacteria	Actinobacteria	Actinobacteria				uncultured_Actinomycetales_bacterium
ASV469	43	0	92	21	112	0	0	0	0	25	0	39	37	74	27	470	Bacteria{superkingdom}(96);Actinobacteria{phylum}(96);Actinobacteria{class}(96);Actinomycetales{order}(96);Sporichthyaceae{family}(96);Sporichthya{genus}(96);Sporichthya_polymorpha{species}(96)	Bacteria	Actinobacteria	Actinobacteria	Actinomycetales	Sporichthyaceae	Sporichthya	Sporichthya_polymorpha
ASV470	0	0	0	0	0	0	0	27	0	0	0	21	55	59	0	162	Bacteria{superkingdom}(100);Unassigned{phylum}(0);Unassigned{class}(0);Unassigned{order}(0);Unassigned{family}(0);Unassigned{genus}(0);Unassigned{species}(0)	Bacteria	Unassigned	Unassigned	Unassigned	Unassigned	Unassigned	Unassigned
ASV472	211	0	340	123	158	0	0	0	52	50	37	0	0	113	47	1131	Bacteria{superkingdom}(98);Chloroflexi{phylum}(98);Anaerolineae{class}(98);Anaerolineales{order}(98);Anaerolineaceae{family}(98);{genus}(98);uncultured_soil_bacterium{species}(98)	Bacteria	Chloroflexi	Anaerolineae	Anaerolineales	Anaerolineaceae		uncultured_soil_bacterium
ASV473	0	0	0	0	0	0	0	0	0	62	0	77	65	90	25	319	Bacteria{superkingdom}(98);Actinobacteria{phylum}(98);Actinobacteria{class}(98);Actinomycetales{order}(98);Micrococcaceae{family}(98);Arthrobacter{genus}(98);Unassigned{species}(0)	Bacteria	Actinobacteria	Actinobacteria	Actinomycetales	Micrococcaceae	Arthrobacter	Unassigned
ASV474	10	133	0	18	0	0	0	55	0	66	0	16	56	32	9	395	Bacteria{superkingdom}(100);Gemmatimonadetes{phylum}(100);Gemmatimonadetes{class}(100);Gemmatimonadales{order}(100);Gemmatimonadaceae{family}(100);Gemmatimonas{genus}(100);Unassigned{species}(0)	Bacteria	Gemmatimonadetes	Gemmatimonadetes	Gemmatimonadales	Gemmatimonadaceae	Gemmatimonas	Unassigned
ASV475	33	25	37	52	43	304	69	117	137	152	65	379	66	125	314	1918	Bacteria{superkingdom}(83);Proteobacteria{phylum}(83);Betaproteobacteria{class}(83);{order}(83);{family}(83);{genus}(83);bacterium_Ellin6067{species}(83)	Bacteria	Proteobacteria	Betaproteobacteria				bacterium_Ellin6067
ASV477	110	0	65	39	30	73	146	122	28	154	0	0	32	90	161	1050	Bacteria{superkingdom}(99);Chloroflexi{phylum}(99);{class}(99);{order}(99);{family}(99);{genus}(99);Unassigned{species}(0)	Bacteria	Chloroflexi					Unassigned
ASV478	0	16	0	0	0	26	27	8	0	90	0	118	118	63	63	529	Bacteria{superkingdom}(100);Actinobacteria{phylum}(100);Actinobacteria{class}(100);Actinomycetales{order}(100);Geodermatophilaceae{family}(100);Unassigned{genus}(0);Unassigned{species}(0)	Bacteria	Actinobacteria	Actinobacteria	Actinomycetales	Geodermatophilaceae	Unassigned	Unassigned
ASV479	0	0	0	0	483	0	0	0	0	51	0	0	0	0	0	534	Bacteria{superkingdom}(100);Acidobacteria{phylum}(100);Acidobacteria_Gp7{class}(100);{order}(100);{family}(100);Gp7{genus}(100);Unassigned{species}(0)	Bacteria	Acidobacteria	Acidobacteria_Gp7			Gp7	Unassigned
ASV480	0	0	0	93	92	0	0	0	0	0	0	0	0	0	0	185	Bacteria{superkingdom}(83);Actinobacteria{phylum}(83);Actinobacteria{class}(83);Actinomycetales{order}(83);Pseudonocardiaceae{family}(83);Unassigned{genus}(0);Unassigned{species}(0)	Bacteria	Actinobacteria	Actinobacteria	Actinomycetales	Pseudonocardiaceae	Unassigned	Unassigned
ASV481	4	3	2	0	5	0	0	205	0	384	4	257	14	81	104	1063	Bacteria{superkingdom}(100);Actinobacteria{phylum}(100);Actinobacteria{class}(100);Actinomycetales{order}(100);Pseudonocardiaceae{family}(100);Unassigned{genus}(0);Unassigned{species}(0)	Bacteria	Actinobacteria	Actinobacteria	Actinomycetales	Pseudonocardiaceae	Unassigned	Unassigned
ASV482	21	39	25	25	18	72	19	137	78	75	120	54	113	84	73	953	Bacteria{superkingdom}(100);Acidobacteria{phylum}(100);Acidobacteria_Gp6{class}(100);{order}(100);{family}(100);Gp6{genus}(100);Unassigned{species}(0)	Bacteria	Acidobacteria	Acidobacteria_Gp6			Gp6	Unassigned
ASV483	37	0	114	257	88	0	0	0	0	0	0	0	0	0	0	496	Bacteria{superkingdom}(100);Actinobacteria{phylum}(100);Actinobacteria{class}(100);Actinomycetales{order}(100);Pseudonocardiaceae{family}(100);Pseudonocardia{genus}(100);Unassigned{species}(0)	Bacteria	Actinobacteria	Actinobacteria	Actinomycetales	Pseudonocardiaceae	Pseudonocardia	Unassigned
ASV484	0	0	0	0	0	0	0	0	0	40	0	0	0	45	0	85	Bacteria{superkingdom}(100);Proteobacteria{phylum}(100);Betaproteobacteria{class}(100);Nitrosomonadales{order}(100);Nitrosomonadaceae{family}(100);Nitrosomonas{genus}(100);Unassigned{species}(0)	Bacteria	Proteobacteria	Betaproteobacteria	Nitrosomonadales	Nitrosomonadaceae	Nitrosomonas	Unassigned
ASV486	0	56	0	0	0	0	0	18	0	0	0	0	0	0	26	100	Bacteria{superkingdom}(97);Bacteroidetes{phylum}(97);Sphingobacteriia{class}(97);Sphingobacteriales{order}(97);Chitinophagaceae{family}(97);Segetibacter{genus}(97);uncultured_bacterium{species}(97)	Bacteria	Bacteroidetes	Sphingobacteriia	Sphingobacteriales	Chitinophagaceae	Segetibacter	uncultured_bacterium
ASV487	0	0	0	0	0	0	37	155	0	0	0	0	0	0	0	192	Bacteria{superkingdom}(97);Acidobacteria{phylum}(97);Acidobacteria_Gp4{class}(97);{order}(97);{family}(97);Gp4{genus}(97);Unassigned{species}(0)	Bacteria	Acidobacteria	Acidobacteria_Gp4			Gp4	Unassigned
ASV488	0	0	10	0	0	0	0	0	0	0	0	0	0	62	0	72	Bacteria{superkingdom}(100);Bacteroidetes{phylum}(100);Cytophagia{class}(100);Cytophagales{order}(100);Cytophagaceae{family}(100);Adhaeribacter{genus}(100);Unassigned{species}(0)	Bacteria	Bacteroidetes	Cytophagia	Cytophagales	Cytophagaceae	Adhaeribacter	Unassigned
ASV489	0	66	26	21	141	0	0	12	56	0	21	64	0	0	25	432	Bacteria{superkingdom}(99);Acidobacteria{phylum}(99);Acidobacteria_Gp4{class}(99);{order}(99);{family}(99);Aridibacter{genus}(99);Unassigned{species}(0)	Bacteria	Acidobacteria	Acidobacteria_Gp4			Aridibacter	Unassigned
ASV490	9	93	0	0	9	94	83	74	16	46	56	107	367	184	728	1866	Bacteria{superkingdom}(98);Chloroflexi{phylum}(98);Chloroflexia{class}(98);{order}(98);{family}(98);{genus}(98);uncultured_bacterium{species}(98)	Bacteria	Chloroflexi	Chloroflexia				uncultured_bacterium
ASV491	69	171	40	22	76	0	0	0	49	0	0	23	0	37	35	522	Bacteria{superkingdom}(100);Bacteroidetes{phylum}(100);Sphingobacteriia{class}(100);Sphingobacteriales{order}(100);Chitinophagaceae{family}(100);Flavitalea{genus}(100);Unassigned{species}(0)	Bacteria	Bacteroidetes	Sphingobacteriia	Sphingobacteriales	Chitinophagaceae	Flavitalea	Unassigned
ASV492	100	36	267	109	76	0	0	0	0	22	44	197	113	0	28	992	Bacteria{superkingdom}(90);Actinobacteria{phylum}(90);Actinobacteria{class}(90);Solirubrobacterales{order}(90);{family}(90);{genus}(90);Unassigned{species}(0)	Bacteria	Actinobacteria	Actinobacteria	Solirubrobacterales			Unassigned
ASV493	40	74	23	31	61	230	123	121	78	45	18	0	0	0	37	881	Bacteria{superkingdom}(100);Proteobacteria{phylum}(100);Betaproteobacteria{class}(100);{order}(100);{family}(100);{genus}(100);Unassigned{species}(0)	Bacteria	Proteobacteria	Betaproteobacteria				Unassigned
ASV494	47	0	31	60	60	17	10	25	68	16	158	86	24	31	47	680	Bacteria{superkingdom}(93);Actinobacteria{phylum}(93);Actinobacteria{class}(93);Acidimicrobiales{order}(93);Iamiaceae{family}(93);{genus}(93);uncultured_Iamia_sp.{species}(93)	Bacteria	Actinobacteria	Actinobacteria	Acidimicrobiales	Iamiaceae		uncultured_Iamia_sp.
ASV495	156	100	0	43	38	0	0	0	0	0	24	0	0	0	0	361	Bacteria{superkingdom}(100);Bacteroidetes{phylum}(100);Flavobacteriia{class}(100);Flavobacteriales{order}(100);Flavobacteriaceae{family}(100);Flavobacterium{genus}(100);Unassigned{species}(0)	Bacteria	Bacteroidetes	Flavobacteriia	Flavobacteriales	Flavobacteriaceae	Flavobacterium	Unassigned
ASV496	100	0	41	33	44	160	24	53	0	53	0	58	0	0	60	626	Bacteria{superkingdom}(100);Planctomycetes{phylum}(100);Planctomycetia{class}(100);Planctomycetales{order}(100);Planctomycetaceae{family}(100);Pirellula{genus}(100);Unassigned{species}(0)	Bacteria	Planctomycetes	Planctomycetia	Planctomycetales	Planctomycetaceae	Pirellula	Unassigned
ASV497	98	0	184	46	0	0	0	0	71	45	56	0	15	0	91	606	Bacteria{superkingdom}(100);Acidobacteria{phylum}(100);Acidobacteria_Gp7{class}(100);{order}(100);{family}(100);Gp7{genus}(100);Unassigned{species}(0)	Bacteria	Acidobacteria	Acidobacteria_Gp7			Gp7	Unassigned
ASV498	71	116	109	39	31	50	200	93	69	31	0	26	0	0	140	975	Bacteria{superkingdom}(99);Actinobacteria{phylum}(99);Actinobacteria{class}(99);Unassigned{order}(0);Unassigned{family}(0);Unassigned{genus}(0);Unassigned{species}(0)	Bacteria	Actinobacteria	Actinobacteria	Unassigned	Unassigned	Unassigned	Unassigned
ASV499	0	98	0	0	0	0	0	193	0	0	0	0	0	0	0	291	Bacteria{superkingdom}(88);Bacteroidetes{phylum}(88);Cytophagia{class}(88);Cytophagales{order}(88);Cytophagaceae{family}(88);Adhaeribacter{genus}(88);uncultured_bacterium{species}(88)	Bacteria	Bacteroidetes	Cytophagia	Cytophagales	Cytophagaceae	Adhaeribacter	uncultured_bacterium
ASV500	0	78	0	0	0	0	0	28	0	29	0	0	27	0	0	162	Bacteria{superkingdom}(83);Bacteroidetes{phylum}(83);Sphingobacteriia{class}(83);Sphingobacteriales{order}(83);Chitinophagaceae{family}(83);{genus}(83);Unassigned{species}(0)	Bacteria	Bacteroidetes	Sphingobacteriia	Sphingobacteriales	Chitinophagaceae		Unassigned
ASV501	59	0	92	107	299	12	8	25	8	12	38	0	0	0	10	670	Bacteria{superkingdom}(100);Chloroflexi{phylum}(100);Chloroflexia{class}(100);Chloroflexales{order}(100);{family}(100);{genus}(100);uncultured_soil_bacterium{species}(100)	Bacteria	Chloroflexi	Chloroflexia	Chloroflexales			uncultured_soil_bacterium
ASV502	0	21	0	0	0	0	0	0	0	0	0	0	0	0	0	21	Bacteria{superkingdom}(100);Actinobacteria{phylum}(100);Actinobacteria{class}(100);Actinomycetales{order}(100);Propionibacteriaceae{family}(100);Friedmanniella{genus}(100);Unassigned{species}(0)	Bacteria	Actinobacteria	Actinobacteria	Actinomycetales	Propionibacteriaceae	Friedmanniella	Unassigned
ASV503	0	0	0	0	0	0	0	67	50	0	0	107	0	31	17	272	Bacteria{superkingdom}(96);Proteobacteria{phylum}(96);Gammaproteobacteria{class}(96);{order}(96);{family}(96);{genus}(96);uncultured_Steroidobacter_sp.{species}(96)	Bacteria	Proteobacteria	Gammaproteobacteria				uncultured_Steroidobacter_sp.
ASV504	35	21	50	42	43	57	50	159	18	30	24	25	27	0	63	644	Bacteria{superkingdom}(95);Chloroflexi{phylum}(95);{class}(95);{order}(95);{family}(95);{genus}(95);Unassigned{species}(0)	Bacteria	Chloroflexi					Unassigned
ASV505	0	0	0	75	0	244	157	328	340	88	417	210	0	59	385	2303	Bacteria{superkingdom}(100);Proteobacteria{phylum}(100);Deltaproteobacteria{class}(100);{order}(100);{family}(100);{genus}(100);uncultured_Syntrophobacterales_bacterium{species}(100)	Bacteria	Proteobacteria	Deltaproteobacteria				uncultured_Syntrophobacterales_bacterium
ASV506	0	0	58	85	162	39	51	23	0	0	50	30	0	0	65	563	Bacteria{superkingdom}(97);Proteobacteria{phylum}(97);Alphaproteobacteria{class}(97);Rhizobiales{order}(97);Hyphomicrobiaceae{family}(97);Hyphomicrobium{genus}(97);Unassigned{species}(0)	Bacteria	Proteobacteria	Alphaproteobacteria	Rhizobiales	Hyphomicrobiaceae	Hyphomicrobium	Unassigned
ASV507	27	19	79	19	142	0	0	0	0	0	0	50	0	81	12	429	Bacteria{superkingdom}(100);Bacteroidetes{phylum}(100);Sphingobacteriia{class}(100);Sphingobacteriales{order}(100);Chitinophagaceae{family}(100);Flavitalea{genus}(100);Unassigned{species}(0)	Bacteria	Bacteroidetes	Sphingobacteriia	Sphingobacteriales	Chitinophagaceae	Flavitalea	Unassigned
ASV508	27	16	13	62	76	20	0	9	0	2	0	17	0	0	0	242	Bacteria{superkingdom}(84);Actinobacteria{phylum}(84);Actinobacteria{class}(84);Actinomycetales{order}(84);Pseudonocardiaceae{family}(84);Actinophytocola{genus}(84);uncultured_bacterium{species}(84)	Bacteria	Actinobacteria	Actinobacteria	Actinomycetales	Pseudonocardiaceae	Actinophytocola	uncultured_bacterium
ASV509	0	48	0	0	0	0	19	0	0	23	0	0	0	0	0	90	Bacteria{superkingdom}(100);Proteobacteria{phylum}(100);Alphaproteobacteria{class}(100);Rhizobiales{order}(100);Unassigned{family}(0);Unassigned{genus}(0);Unassigned{species}(0)	Bacteria	Proteobacteria	Alphaproteobacteria	Rhizobiales	Unassigned	Unassigned	Unassigned
ASV510	0	0	0	22	0	0	0	13	0	25	0	0	35	0	0	95	Bacteria{superkingdom}(100);Proteobacteria{phylum}(100);Alphaproteobacteria{class}(100);Rhizobiales{order}(100);Rhizobiaceae{family}(100);Rhizobium{genus}(100);Unassigned{species}(0)	Bacteria	Proteobacteria	Alphaproteobacteria	Rhizobiales	Rhizobiaceae	Rhizobium	Unassigned
ASV511	48	88	44	13	21	65	83	70	34	150	0	41	14	99	64	834	Bacteria{superkingdom}(100);Planctomycetes{phylum}(100);Planctomycetia{class}(100);Planctomycetales{order}(100);Planctomycetaceae{family}(100);Pirellula{genus}(100);Unassigned{species}(0)	Bacteria	Planctomycetes	Planctomycetia	Planctomycetales	Planctomycetaceae	Pirellula	Unassigned
ASV513	0	562	0	0	0	0	172	71	0	37	0	0	0	39	0	881	Bacteria{superkingdom}(100);Proteobacteria{phylum}(100);Alphaproteobacteria{class}(100);Sphingomonadales{order}(100);Sphingomonadaceae{family}(100);Unassigned{genus}(0);Unassigned{species}(0)	Bacteria	Proteobacteria	Alphaproteobacteria	Sphingomonadales	Sphingomonadaceae	Unassigned	Unassigned
ASV514	61	0	0	162	161	229	31	52	21	43	105	0	0	0	0	865	Bacteria{superkingdom}(100);Bacteroidetes{phylum}(100);Cytophagia{class}(100);Cytophagales{order}(100);{family}(100);Ohtaekwangia{genus}(100);Unassigned{species}(0)	Bacteria	Bacteroidetes	Cytophagia	Cytophagales		Ohtaekwangia	Unassigned
ASV515	0	27	14	0	16	276	211	286	175	105	65	34	148	15	367	1739	Bacteria{superkingdom}(97);{phylum}(97);{class}(97);{order}(97);{family}(97);{genus}(97);uncultured_Gemmatimonadetes_bacterium{species}(97)	Bacteria						uncultured_Gemmatimonadetes_bacterium
ASV516	85	3	140	0	53	0	0	5	0	0	0	0	0	0	0	286	Bacteria{superkingdom}(100);Acidobacteria{phylum}(100);Acidobacteria_Gp4{class}(100);{order}(100);{family}(100);Gp4{genus}(100);Unassigned{species}(0)	Bacteria	Acidobacteria	Acidobacteria_Gp4			Gp4	Unassigned
ASV517	0	0	0	9	0	3	0	10	3	19	0	130	46	81	0	301	Bacteria{superkingdom}(100);Proteobacteria{phylum}(100);Alphaproteobacteria{class}(100);Alphaproteobacteria_incertae_sedis{order}(100);{family}(100);Geminicoccus{genus}(100);Unassigned{species}(0)	Bacteria	Proteobacteria	Alphaproteobacteria	Alphaproteobacteria_incertae_sedis		Geminicoccus	Unassigned
ASV518	32	128	37	45	40	29	26	36	0	62	26	53	60	78	47	699	Bacteria{superkingdom}(100);Proteobacteria{phylum}(100);Alphaproteobacteria{class}(100);Caulobacterales{order}(100);Caulobacteraceae{family}(100);Phenylobacterium{genus}(100);Unassigned{species}(0)	Bacteria	Proteobacteria	Alphaproteobacteria	Caulobacterales	Caulobacteraceae	Phenylobacterium	Unassigned
ASV520	56	0	75	138	135	12	0	120	0	10	0	0	0	0	0	546	Bacteria{superkingdom}(82);Proteobacteria{phylum}(82);Gammaproteobacteria{class}(82);Xanthomonadales{order}(82);{family}(82);{genus}(82);uncultured_Pseudomonadales_bacterium{species}(82)	Bacteria	Proteobacteria	Gammaproteobacteria	Xanthomonadales			uncultured_Pseudomonadales_bacterium
ASV521	0	0	16	22	0	29	0	22	0	78	0	33	97	0	38	335	Bacteria{superkingdom}(86);Proteobacteria{phylum}(86);Alphaproteobacteria{class}(86);Rhizobiales{order}(86);Methylobacteriaceae{family}(86);Microvirga{genus}(86);uncultured_alpha_proteobacterium{species}(86)	Bacteria	Proteobacteria	Alphaproteobacteria	Rhizobiales	Methylobacteriaceae	Microvirga	uncultured_alpha_proteobacterium
ASV522	0	54	25	32	0	0	0	237	16	0	0	0	0	0	0	364	Bacteria{superkingdom}(87);Actinobacteria{phylum}(87);Actinobacteria{class}(87);Actinomycetales{order}(87);Pseudonocardiaceae{family}(87);Kibdelosporangium{genus}(87);uncultured_bacterium{species}(87)	Bacteria	Actinobacteria	Actinobacteria	Actinomycetales	Pseudonocardiaceae	Kibdelosporangium	uncultured_bacterium
ASV523	64	17	260	39	73	189	130	27	112	88	449	33	23	19	114	1637	Bacteria{superkingdom}(99);Chloroflexi{phylum}(99);Thermomicrobia{class}(99);Sphaerobacterales{order}(99);Sphaerobacteraceae{family}(99);Unassigned{genus}(0);Unassigned{species}(0)	Bacteria	Chloroflexi	Thermomicrobia	Sphaerobacterales	Sphaerobacteraceae	Unassigned	Unassigned
ASV524	0	0	0	0	0	0	0	28	0	0	0	0	0	0	0	28	Bacteria{superkingdom}(99);Acidobacteria{phylum}(99);Acidobacteria_Gp4{class}(99);{order}(99);{family}(99);Gp4{genus}(99);Unassigned{species}(0)	Bacteria	Acidobacteria	Acidobacteria_Gp4			Gp4	Unassigned
ASV526	110	0	118	83	45	107	153	71	50	103	0	0	0	0	0	840	Bacteria{superkingdom}(100);Chloroflexi{phylum}(100);Chloroflexia{class}(100);{order}(100);{family}(100);{genus}(100);uncultured_bacterium{species}(100)	Bacteria	Chloroflexi	Chloroflexia				uncultured_bacterium
ASV527	0	0	20	42	0	0	0	58	0	27	0	86	51	296	0	580	Bacteria{superkingdom}(80);Acidobacteria{phylum}(80);Acidobacteria_Gp10{class}(80);{order}(80);{family}(80);Gp10{genus}(80);uncultured_proteobacterium{species}(80)	Bacteria	Acidobacteria	Acidobacteria_Gp10			Gp10	uncultured_proteobacterium
ASV528	0	0	58	53	37	134	141	297	229	67	39	104	0	92	83	1334	Bacteria{superkingdom}(98);Chloroflexi{phylum}(98);Chloroflexia{class}(98);{order}(98);{family}(98);{genus}(98);uncultured_bacterium{species}(98)	Bacteria	Chloroflexi	Chloroflexia				uncultured_bacterium
ASV529	0	0	0	0	73	0	72	50	0	0	0	53	0	136	0	384	Bacteria{superkingdom}(100);Bacteroidetes{phylum}(100);Sphingobacteriia{class}(100);Sphingobacteriales{order}(100);Chitinophagaceae{family}(100);Chitinophaga{genus}(100);Unassigned{species}(0)	Bacteria	Bacteroidetes	Sphingobacteriia	Sphingobacteriales	Chitinophagaceae	Chitinophaga	Unassigned
ASV530	0	0	0	0	0	0	0	0	0	0	0	26	28	0	0	54	Bacteria{superkingdom}(100);Bacteroidetes{phylum}(100);Sphingobacteriia{class}(100);Sphingobacteriales{order}(100);Chitinophagaceae{family}(100);Flavisolibacter{genus}(100);Unassigned{species}(0)	Bacteria	Bacteroidetes	Sphingobacteriia	Sphingobacteriales	Chitinophagaceae	Flavisolibacter	Unassigned
ASV531	101	11	64	173	117	132	122	30	69	6	11	0	0	9	11	856	Bacteria{superkingdom}(100);Chloroflexi{phylum}(100);{class}(100);{order}(100);{family}(100);{genus}(100);Unassigned{species}(0)	Bacteria	Chloroflexi					Unassigned
ASV532	68	0	1	56	36	0	0	0	0	44	0	170	30	0	0	405	Bacteria{superkingdom}(100);Actinobacteria{phylum}(100);Actinobacteria{class}(100);Actinomycetales{order}(100);Nocardioidaceae{family}(100);Nocardioides{genus}(100);Unassigned{species}(0)	Bacteria	Actinobacteria	Actinobacteria	Actinomycetales	Nocardioidaceae	Nocardioides	Unassigned
ASV533	0	69	0	40	0	0	0	0	65	0	66	57	0	0	0	297	Bacteria{superkingdom}(91);Actinobacteria{phylum}(91);Actinobacteria{class}(91);Solirubrobacterales{order}(91);Solirubrobacteraceae{family}(91);Solirubrobacter{genus}(91);uncultured_bacterium{species}(91)	Bacteria	Actinobacteria	Actinobacteria	Solirubrobacterales	Solirubrobacteraceae	Solirubrobacter	uncultured_bacterium
ASV534	0	0	0	0	0	0	0	0	0	66	0	0	0	0	0	66	Bacteria{superkingdom}(94);Actinobacteria{phylum}(94);Actinobacteria{class}(94);{order}(94);{family}(94);{genus}(94);uncultured_Actinomycetales_bacterium{species}(94)	Bacteria	Actinobacteria	Actinobacteria				uncultured_Actinomycetales_bacterium
ASV535	37	194	26	20	51	0	0	20	0	0	79	0	0	0	0	427	Bacteria{superkingdom}(85);Actinobacteria{phylum}(85);Actinobacteria{class}(85);Acidimicrobiales{order}(85);Iamiaceae{family}(85);{genus}(85);uncultured_Iamia_sp.{species}(85)	Bacteria	Actinobacteria	Actinobacteria	Acidimicrobiales	Iamiaceae		uncultured_Iamia_sp.
ASV537	0	0	0	13	0	0	47	65	0	90	30	66	270	66	58	705	Bacteria{superkingdom}(85);Proteobacteria{phylum}(85);Alphaproteobacteria{class}(85);Rhizobiales{order}(85);Methylobacteriaceae{family}(85);{genus}(85);uncultured_bacterium{species}(85)	Bacteria	Proteobacteria	Alphaproteobacteria	Rhizobiales	Methylobacteriaceae		uncultured_bacterium
ASV538	0	0	0	0	0	0	0	0	0	0	0	46	16	0	0	62	Bacteria{superkingdom}(100);Chloroflexi{phylum}(100);Thermomicrobia{class}(100);Sphaerobacterales{order}(100);Sphaerobacteraceae{family}(100);Unassigned{genus}(0);Unassigned{species}(0)	Bacteria	Chloroflexi	Thermomicrobia	Sphaerobacterales	Sphaerobacteraceae	Unassigned	Unassigned
ASV539	0	110	0	0	0	37	63	0	0	0	0	0	124	0	0	334	Bacteria{superkingdom}(100);Proteobacteria{phylum}(100);Betaproteobacteria{class}(100);{order}(100);{family}(100);{genus}(100);Unassigned{species}(0)	Bacteria	Proteobacteria	Betaproteobacteria				Unassigned
ASV540	0	30	0	0	0	0	0	0	0	34	0	0	0	32	0	96	Bacteria{superkingdom}(100);Proteobacteria{phylum}(100);Alphaproteobacteria{class}(100);Rhizobiales{order}(100);{family}(100);{genus}(100);uncultured_endolithic_bacterium{species}(100)	Bacteria	Proteobacteria	Alphaproteobacteria	Rhizobiales			uncultured_endolithic_bacterium
ASV541	0	0	0	5	0	0	0	0	5	0	0	0	5	0	0	15	Bacteria{superkingdom}(98);Bacteroidetes{phylum}(98);Cytophagia{class}(98);Cytophagales{order}(98);Cytophagaceae{family}(98);Dyadobacter{genus}(98);Cytophagaceae_bacterium_PTR3{species}(98)	Bacteria	Bacteroidetes	Cytophagia	Cytophagales	Cytophagaceae	Dyadobacter	Cytophagaceae_bacterium_PTR3
ASV542	19	0	0	13	13	0	0	0	0	0	0	0	0	0	0	45	Bacteria{superkingdom}(100);Acidobacteria{phylum}(100);Acidobacteria_Gp10{class}(100);{order}(100);{family}(100);Gp10{genus}(100);Unassigned{species}(0)	Bacteria	Acidobacteria	Acidobacteria_Gp10			Gp10	Unassigned
ASV543	70	64	0	0	0	75	21	42	56	123	0	0	0	115	53	619	Bacteria{superkingdom}(99);Acidobacteria{phylum}(99);Acidobacteria_Gp6{class}(99);{order}(99);{family}(99);Gp6{genus}(99);Unassigned{species}(0)	Bacteria	Acidobacteria	Acidobacteria_Gp6			Gp6	Unassigned
ASV544	0	0	0	0	0	0	0	0	0	81	0	0	0	44	0	125	Bacteria{superkingdom}(100);Proteobacteria{phylum}(100);Alphaproteobacteria{class}(100);Rhizobiales{order}(100);Unassigned{family}(0);Unassigned{genus}(0);Unassigned{species}(0)	Bacteria	Proteobacteria	Alphaproteobacteria	Rhizobiales	Unassigned	Unassigned	Unassigned
ASV545	18	0	16	0	27	35	33	0	25	0	0	0	0	0	472	626	Bacteria{superkingdom}(100);Chloroflexi{phylum}(100);Chloroflexia{class}(100);{order}(100);{family}(100);{genus}(100);uncultured_Herpetosiphon_sp.{species}(100)	Bacteria	Chloroflexi	Chloroflexia				uncultured_Herpetosiphon_sp.
ASV546	115	33	136	77	59	19	44	38	27	54	91	218	23	212	120	1266	Bacteria{superkingdom}(100);Chloroflexi{phylum}(100);Thermomicrobia{class}(100);Unassigned{order}(0);Unassigned{family}(0);Unassigned{genus}(0);Unassigned{species}(0)	Bacteria	Chloroflexi	Thermomicrobia	Unassigned	Unassigned	Unassigned	Unassigned
ASV547	37	0	94	110	0	196	0	53	258	151	98	0	31	0	78	1106	Bacteria{superkingdom}(90);Firmicutes{phylum}(90);Bacilli{class}(90);Bacillales{order}(90);Bacillaceae_1{family}(90);Bacillus{genus}(90);Bacillus_funiculus{species}(90)	Bacteria	Firmicutes	Bacilli	Bacillales	Bacillaceae_1	Bacillus	Bacillus_funiculus
ASV548	37	51	20	31	42	77	130	124	117	66	79	68	20	0	93	955	Bacteria{superkingdom}(100);Proteobacteria{phylum}(100);Betaproteobacteria{class}(100);{order}(100);{family}(100);{genus}(100);Unassigned{species}(0)	Bacteria	Proteobacteria	Betaproteobacteria				Unassigned
ASV549	0	0	0	0	0	0	0	0	0	0	0	0	0	86	0	86	Bacteria{superkingdom}(100);Proteobacteria{phylum}(100);Unassigned{class}(0);Unassigned{order}(0);Unassigned{family}(0);Unassigned{genus}(0);Unassigned{species}(0)	Bacteria	Proteobacteria	Unassigned	Unassigned	Unassigned	Unassigned	Unassigned
ASV550	34	114	0	0	67	23	0	0	11	21	39	22	0	22	53	406	Bacteria{superkingdom}(94);Proteobacteria{phylum}(94);Alphaproteobacteria{class}(94);Rhizobiales{order}(94);Rhodobiaceae{family}(94);{genus}(94);Nordella_oligomobilis{species}(94)	Bacteria	Proteobacteria	Alphaproteobacteria	Rhizobiales	Rhodobiaceae		Nordella_oligomobilis
ASV551	0	32	0	0	0	0	0	0	0	0	0	0	0	0	0	32	Bacteria{superkingdom}(87);Proteobacteria{phylum}(87);Alphaproteobacteria{class}(87);Rhizobiales{order}(87);Methylobacteriaceae{family}(87);{genus}(87);uncultured_bacterium{species}(87)	Bacteria	Proteobacteria	Alphaproteobacteria	Rhizobiales	Methylobacteriaceae		uncultured_bacterium
ASV552	34	69	23	29	11	21	19	72	14	76	0	0	0	48	9	425	Bacteria{superkingdom}(100);Actinobacteria{phylum}(100);Actinobacteria{class}(100);Rubrobacterales{order}(100);Rubrobacteraceae{family}(100);Rubrobacter{genus}(100);Unassigned{species}(0)	Bacteria	Actinobacteria	Actinobacteria	Rubrobacterales	Rubrobacteraceae	Rubrobacter	Unassigned
ASV553	33	118	49	0	0	0	0	0	0	0	0	0	0	0	0	200	Bacteria{superkingdom}(89);Acidobacteria{phylum}(89);Acidobacteria_Gp4{class}(89);{order}(89);{family}(89);Gp4{genus}(89);uncultured_Rhodopseudomonas_sp.{species}(89)	Bacteria	Acidobacteria	Acidobacteria_Gp4			Gp4	uncultured_Rhodopseudomonas_sp.
ASV554	60	162	0	0	26	501	183	99	0	121	0	0	0	0	0	1152	Bacteria{superkingdom}(99);Chloroflexi{phylum}(99);Caldilineae{class}(99);Caldilineales{order}(99);Caldilineaceae{family}(99);Litorilinea{genus}(99);uncultured_Litorilinea_sp.{species}(99)	Bacteria	Chloroflexi	Caldilineae	Caldilineales	Caldilineaceae	Litorilinea	uncultured_Litorilinea_sp.
ASV555	62	14	54	18	5	0	0	0	0	13	1	0	0	1	37	205	Bacteria{superkingdom}(100);Acidobacteria{phylum}(100);Acidobacteria_Gp10{class}(100);{order}(100);{family}(100);Gp10{genus}(100);Unassigned{species}(0)	Bacteria	Acidobacteria	Acidobacteria_Gp10			Gp10	Unassigned
ASV556	0	101	0	0	0	0	0	31	49	35	0	103	0	84	0	403	Bacteria{superkingdom}(100);Actinobacteria{phylum}(100);Actinobacteria{class}(100);Solirubrobacterales{order}(100);Unassigned{family}(0);Unassigned{genus}(0);Unassigned{species}(0)	Bacteria	Actinobacteria	Actinobacteria	Solirubrobacterales	Unassigned	Unassigned	Unassigned
ASV557	0	0	0	0	0	0	0	0	0	0	0	0	0	8	0	8	Bacteria{superkingdom}(81);Chloroflexi{phylum}(81);Chloroflexia{class}(81);{order}(81);{family}(81);{genus}(81);uncultured_bacterium{species}(81)	Bacteria	Chloroflexi	Chloroflexia				uncultured_bacterium
ASV558	18	0	108	35	38	144	110	15	53	72	0	0	0	0	7	600	Bacteria{superkingdom}(99);Chloroflexi{phylum}(99);{class}(99);{order}(99);{family}(99);{genus}(99);Unassigned{species}(0)	Bacteria	Chloroflexi					Unassigned
ASV559	117	0	31	17	154	99	19	73	410	48	342	0	0	0	7	1317	Bacteria{superkingdom}(80);Firmicutes{phylum}(80);Bacilli{class}(80);Bacillales{order}(80);Planococcaceae{family}(80);Lysinibacillus{genus}(80);Unassigned{species}(0)	Bacteria	Firmicutes	Bacilli	Bacillales	Planococcaceae	Lysinibacillus	Unassigned
ASV560	0	0	0	0	25	25	0	40	0	63	85	249	330	66	44	927	Bacteria{superkingdom}(100);Chloroflexi{phylum}(100);Thermomicrobia{class}(100);Unassigned{order}(0);Unassigned{family}(0);Unassigned{genus}(0);Unassigned{species}(0)	Bacteria	Chloroflexi	Thermomicrobia	Unassigned	Unassigned	Unassigned	Unassigned
ASV562	0	67	0	0	0	0	0	0	0	0	0	0	0	0	0	67	Bacteria{superkingdom}(100);Chloroflexi{phylum}(100);{class}(100);{order}(100);{family}(100);{genus}(100);uncultured_endolithic_bacterium{species}(100)	Bacteria	Chloroflexi					uncultured_endolithic_bacterium
ASV564	132	0	128	107	65	189	81	65	0	75	0	0	0	0	130	972	Bacteria{superkingdom}(100);Chloroflexi{phylum}(100);Anaerolineae{class}(100);Anaerolineales{order}(100);Anaerolineaceae{family}(100);{genus}(100);uncultured_soil_bacterium{species}(100)	Bacteria	Chloroflexi	Anaerolineae	Anaerolineales	Anaerolineaceae		uncultured_soil_bacterium
ASV565	0	0	0	0	0	0	0	0	0	34	0	46	0	37	0	117	Bacteria{superkingdom}(94);Actinobacteria{phylum}(94);Actinobacteria{class}(94);Actinomycetales{order}(94);Micrococcaceae{family}(94);Kocuria{genus}(94);Unassigned{species}(0)	Bacteria	Actinobacteria	Actinobacteria	Actinomycetales	Micrococcaceae	Kocuria	Unassigned
ASV567	0	0	0	0	0	0	0	0	0	6	0	0	0	0	0	6	Bacteria{superkingdom}(100);Bacteroidetes{phylum}(100);Cytophagia{class}(100);Cytophagales{order}(100);Cytophagaceae{family}(100);Dyadobacter{genus}(100);Cytophagaceae_bacterium_PTR3{species}(100)	Bacteria	Bacteroidetes	Cytophagia	Cytophagales	Cytophagaceae	Dyadobacter	Cytophagaceae_bacterium_PTR3
ASV568	0	0	0	0	0	33	0	0	415	0	0	0	944	0	309	1701	Bacteria{superkingdom}(99);Actinobacteria{phylum}(99);Actinobacteria{class}(99);{order}(99);{family}(99);{genus}(99);uncultured_Actinomycetales_bacterium{species}(99)	Bacteria	Actinobacteria	Actinobacteria				uncultured_Actinomycetales_bacterium
ASV569	0	0	0	0	20	0	0	0	0	0	0	0	0	0	24	44	Bacteria{superkingdom}(95);Bacteroidetes{phylum}(95);Sphingobacteriia{class}(95);Sphingobacteriales{order}(95);Chitinophagaceae{family}(95);Segetibacter{genus}(95);uncultured_bacterium{species}(95)	Bacteria	Bacteroidetes	Sphingobacteriia	Sphingobacteriales	Chitinophagaceae	Segetibacter	uncultured_bacterium
ASV570	86	0	0	270	80	37	42	113	20	18	15	0	0	69	0	750	Bacteria{superkingdom}(100);Proteobacteria{phylum}(100);Alphaproteobacteria{class}(100);Rhodospirillales{order}(100);{family}(100);Reyranella{genus}(100);Unassigned{species}(0)	Bacteria	Proteobacteria	Alphaproteobacteria	Rhodospirillales		Reyranella	Unassigned
ASV571	0	0	0	0	0	0	0	90	51	0	0	44	572	143	89	989	Bacteria{superkingdom}(100);Bacteroidetes{phylum}(100);Cytophagia{class}(100);Cytophagales{order}(100);Cytophagaceae{family}(100);Adhaeribacter{genus}(100);Unassigned{species}(0)	Bacteria	Bacteroidetes	Cytophagia	Cytophagales	Cytophagaceae	Adhaeribacter	Unassigned
ASV573	29	0	16	12	8	169	187	16	80	380	165	205	63	7	59	1396	Bacteria{superkingdom}(99);Actinobacteria{phylum}(99);Actinobacteria{class}(99);Actinomycetales{order}(99);Nocardioidaceae{family}(99);Nocardioides{genus}(99);Unassigned{species}(0)	Bacteria	Actinobacteria	Actinobacteria	Actinomycetales	Nocardioidaceae	Nocardioides	Unassigned
ASV574	0	0	0	29	0	0	0	0	0	0	0	0	82	42	0	153	Bacteria{superkingdom}(80);Proteobacteria{phylum}(80);Betaproteobacteria{class}(80);{order}(80);{family}(80);{genus}(80);uncultured_Alcaligenaceae_bacterium{species}(80)	Bacteria	Proteobacteria	Betaproteobacteria				uncultured_Alcaligenaceae_bacterium
ASV575	55	0	116	62	0	0	0	0	89	0	32	0	91	0	29	474	Bacteria{superkingdom}(100);Actinobacteria{phylum}(100);Actinobacteria{class}(100);Actinomycetales{order}(100);Nocardioidaceae{family}(100);Nocardioides{genus}(100);Unassigned{species}(0)	Bacteria	Actinobacteria	Actinobacteria	Actinomycetales	Nocardioidaceae	Nocardioides	Unassigned
ASV576	20	0	17	66	49	58	32	62	98	0	42	67	0	69	86	666	Bacteria{superkingdom}(80);Acidobacteria{phylum}(80);{class}(80);{order}(80);{family}(80);{genus}(80);uncultured_microorganism{species}(80)	Bacteria	Acidobacteria					uncultured_microorganism
ASV578	40	0	69	135	57	0	0	0	96	0	0	0	0	0	0	397	Bacteria{superkingdom}(100);Actinobacteria{phylum}(100);Actinobacteria{class}(100);Actinomycetales{order}(100);Nocardioidaceae{family}(100);Nocardioides{genus}(100);Unassigned{species}(0)	Bacteria	Actinobacteria	Actinobacteria	Actinomycetales	Nocardioidaceae	Nocardioides	Unassigned
ASV579	52	112	0	78	93	53	81	0	61	152	48	69	0	0	97	896	Bacteria{superkingdom}(100);Proteobacteria{phylum}(100);Unassigned{class}(0);Unassigned{order}(0);Unassigned{family}(0);Unassigned{genus}(0);Unassigned{species}(0)	Bacteria	Proteobacteria	Unassigned	Unassigned	Unassigned	Unassigned	Unassigned
ASV580	140	0	58	204	3352	0	40	0	0	28	0	0	0	0	0	3822	Bacteria{superkingdom}(100);Bacteroidetes{phylum}(100);Flavobacteriia{class}(100);Flavobacteriales{order}(100);Flavobacteriaceae{family}(100);Flavobacterium{genus}(100);Unassigned{species}(0)	Bacteria	Bacteroidetes	Flavobacteriia	Flavobacteriales	Flavobacteriaceae	Flavobacterium	Unassigned
ASV581	59	0	168	0	0	0	0	0	0	0	0	0	0	0	0	227	Bacteria{superkingdom}(99);Actinobacteria{phylum}(99);Unassigned{class}(0);Unassigned{order}(0);Unassigned{family}(0);Unassigned{genus}(0);Unassigned{species}(0)	Bacteria	Actinobacteria	Unassigned	Unassigned	Unassigned	Unassigned	Unassigned
ASV582	0	42	0	0	0	0	27	26	0	31	0	271	43	37	16	493	Bacteria{superkingdom}(100);Actinobacteria{phylum}(100);Actinobacteria{class}(100);Actinomycetales{order}(100);Thermomonosporaceae{family}(100);Actinomadura{genus}(100);Unassigned{species}(0)	Bacteria	Actinobacteria	Actinobacteria	Actinomycetales	Thermomonosporaceae	Actinomadura	Unassigned
ASV584	30	65	0	0	0	0	0	0	22	20	0	0	0	12	15	164	Bacteria{superkingdom}(95);Proteobacteria{phylum}(95);Alphaproteobacteria{class}(95);Sphingomonadales{order}(95);Erythrobacteraceae{family}(95);Altererythrobacter{genus}(95);Unassigned{species}(0)	Bacteria	Proteobacteria	Alphaproteobacteria	Sphingomonadales	Erythrobacteraceae	Altererythrobacter	Unassigned
ASV585	0	36	50	18	69	187	136	0	74	50	87	27	49	30	96	909	Bacteria{superkingdom}(93);Proteobacteria{phylum}(93);Alphaproteobacteria{class}(93);Rhizobiales{order}(93);Rhodobiaceae{family}(93);{genus}(93);Unassigned{species}(0)	Bacteria	Proteobacteria	Alphaproteobacteria	Rhizobiales	Rhodobiaceae		Unassigned
ASV586	59	100	60	36	11	31	0	26	82	17	46	35	0	0	95	598	Bacteria{superkingdom}(100);Proteobacteria{phylum}(100);Betaproteobacteria{class}(100);{order}(100);{family}(100);{genus}(100);Unassigned{species}(0)	Bacteria	Proteobacteria	Betaproteobacteria				Unassigned
ASV587	0	0	0	25	48	0	0	0	30	0	0	0	0	0	0	103	Bacteria{superkingdom}(100);Proteobacteria{phylum}(100);Alphaproteobacteria{class}(100);Rhizobiales{order}(100);Hyphomicrobiaceae{family}(100);Pedomicrobium{genus}(100);Unassigned{species}(0)	Bacteria	Proteobacteria	Alphaproteobacteria	Rhizobiales	Hyphomicrobiaceae	Pedomicrobium	Unassigned
ASV588	74	18	0	18	108	0	0	0	77	0	0	0	0	38	0	333	Bacteria{superkingdom}(94);Actinobacteria{phylum}(94);Actinobacteria{class}(94);Solirubrobacterales{order}(94);Conexibacteraceae{family}(94);Conexibacter{genus}(94);uncultured_Rubrobacteraceae_bacterium{species}(94)	Bacteria	Actinobacteria	Actinobacteria	Solirubrobacterales	Conexibacteraceae	Conexibacter	uncultured_Rubrobacteraceae_bacterium
ASV589	318	0	43	179	307	0	0	0	0	0	160	0	0	0	26	1033	Bacteria{superkingdom}(100);Bacteroidetes{phylum}(100);Cytophagia{class}(100);Cytophagales{order}(100);{family}(100);Ohtaekwangia{genus}(100);Unassigned{species}(0)	Bacteria	Bacteroidetes	Cytophagia	Cytophagales		Ohtaekwangia	Unassigned
ASV590	19	0	21	0	107	0	36	0	0	35	0	0	117	78	9	422	Bacteria{superkingdom}(100);Bacteroidetes{phylum}(100);Sphingobacteriia{class}(100);Sphingobacteriales{order}(100);Chitinophagaceae{family}(100);{genus}(100);agricultural_soil_bacterium_SC-I-64{species}(100)	Bacteria	Bacteroidetes	Sphingobacteriia	Sphingobacteriales	Chitinophagaceae		agricultural_soil_bacterium_SC-I-64
ASV591	0	0	0	0	0	0	0	0	0	0	0	76	0	39	0	115	Bacteria{superkingdom}(100);Actinobacteria{phylum}(100);Actinobacteria{class}(100);Actinomycetales{order}(100);Nocardioidaceae{family}(100);Nocardioides{genus}(100);Unassigned{species}(0)	Bacteria	Actinobacteria	Actinobacteria	Actinomycetales	Nocardioidaceae	Nocardioides	Unassigned
ASV592	81	50	102	118	98	31	60	36	69	72	84	53	0	324	53	1231	Bacteria{superkingdom}(100);Chloroflexi{phylum}(100);Caldilineae{class}(100);Caldilineales{order}(100);Caldilineaceae{family}(100);Litorilinea{genus}(100);Unassigned{species}(0)	Bacteria	Chloroflexi	Caldilineae	Caldilineales	Caldilineaceae	Litorilinea	Unassigned
ASV593	104	0	38	217	123	0	0	0	0	62	35	104	35	22	24	764	Bacteria{superkingdom}(100);Armatimonadetes{phylum}(100);{class}(100);{order}(100);{family}(100);Armatimonadetes_gp4{genus}(100);uncultured_candidate_division_OP10_bacterium{species}(100)	Bacteria	Armatimonadetes				Armatimonadetes_gp4	uncultured_candidate_division_OP10_bacterium
ASV595	21	76	30	10	23	38	53	135	0	0	0	0	0	29	0	415	Bacteria{superkingdom}(98);Proteobacteria{phylum}(98);Betaproteobacteria{class}(98);{order}(98);{family}(98);{genus}(98);Unassigned{species}(0)	Bacteria	Proteobacteria	Betaproteobacteria				Unassigned
ASV596	50	78	0	80	45	67	0	91	0	462	184	76	0	176	123	1432	Bacteria{superkingdom}(99);Chloroflexi{phylum}(99);Thermomicrobia{class}(99);Sphaerobacterales{order}(99);Sphaerobacteraceae{family}(99);Unassigned{genus}(0);Unassigned{species}(0)	Bacteria	Chloroflexi	Thermomicrobia	Sphaerobacterales	Sphaerobacteraceae	Unassigned	Unassigned
ASV597	0	0	26	19	0	47	32	152	14	200	0	14	0	0	0	504	Bacteria{superkingdom}(87);Actinobacteria{phylum}(87);Actinobacteria{class}(87);Unassigned{order}(0);Unassigned{family}(0);Unassigned{genus}(0);Unassigned{species}(0)	Bacteria	Actinobacteria	Actinobacteria	Unassigned	Unassigned	Unassigned	Unassigned
ASV598	95	30	41	76	59	222	0	0	41	22	26	0	0	0	0	612	Bacteria{superkingdom}(94);Proteobacteria{phylum}(94);Gammaproteobacteria{class}(94);{order}(94);{family}(94);{genus}(94);uncultured_Steroidobacter_sp.{species}(94)	Bacteria	Proteobacteria	Gammaproteobacteria				uncultured_Steroidobacter_sp.
ASV599	0	35	19	25	13	32	34	24	39	36	0	91	0	67	80	495	Bacteria{superkingdom}(94);Actinobacteria{phylum}(94);Actinobacteria{class}(94);Solirubrobacterales{order}(94);{family}(94);{genus}(94);uncultured_bacterium{species}(94)	Bacteria	Actinobacteria	Actinobacteria	Solirubrobacterales			uncultured_bacterium
ASV600	72	0	69	74	82	27	0	40	68	108	21	0	0	0	0	561	Bacteria{superkingdom}(96);Proteobacteria{phylum}(96);Betaproteobacteria{class}(96);Burkholderiales{order}(96);Oxalobacteraceae{family}(96);Massilia{genus}(96);Unassigned{species}(0)	Bacteria	Proteobacteria	Betaproteobacteria	Burkholderiales	Oxalobacteraceae	Massilia	Unassigned
ASV601	0	602	69	54	0	0	106	163	0	162	0	0	0	0	0	1156	Bacteria{superkingdom}(99);Acidobacteria{phylum}(99);Acidobacteria_Gp16{class}(99);{order}(99);{family}(99);Gp16{genus}(99);uncultured_bacterium{species}(99)	Bacteria	Acidobacteria	Acidobacteria_Gp16			Gp16	uncultured_bacterium
ASV602	165	21	88	62	212	142	66	0	113	107	139	274	0	65	539	1993	Bacteria{superkingdom}(94);Planctomycetes{phylum}(94);Planctomycetia{class}(94);Planctomycetales{order}(94);Planctomycetaceae{family}(94);Gimesia{genus}(94);uncultured_Planctomyces_sp.{species}(94)	Bacteria	Planctomycetes	Planctomycetia	Planctomycetales	Planctomycetaceae	Gimesia	uncultured_Planctomyces_sp.
ASV603	36	38	0	42	41	0	0	55	27	82	72	94	232	90	117	926	Bacteria{superkingdom}(100);Proteobacteria{phylum}(100);Betaproteobacteria{class}(100);{order}(100);{family}(100);{genus}(100);Unassigned{species}(0)	Bacteria	Proteobacteria	Betaproteobacteria				Unassigned
ASV604	111	36	67	430	281	37	73	23	31	33	45	59	61	45	70	1402	Bacteria{superkingdom}(100);Proteobacteria{phylum}(100);Alphaproteobacteria{class}(100);Rhizobiales{order}(100);Bradyrhizobiaceae{family}(100);Bosea{genus}(100);Unassigned{species}(0)	Bacteria	Proteobacteria	Alphaproteobacteria	Rhizobiales	Bradyrhizobiaceae	Bosea	Unassigned
ASV605	42	101	46	65	60	80	0	0	83	82	0	0	255	65	106	985	Bacteria{superkingdom}(99);Proteobacteria{phylum}(99);Betaproteobacteria{class}(99);{order}(99);{family}(99);{genus}(99);Unassigned{species}(0)	Bacteria	Proteobacteria	Betaproteobacteria				Unassigned
ASV606	0	34	0	0	0	0	0	28	0	3	0	0	0	0	0	65	Bacteria{superkingdom}(98);Proteobacteria{phylum}(98);Alphaproteobacteria{class}(98);Rhizobiales{order}(98);{family}(98);{genus}(98);uncultured_endolithic_bacterium{species}(98)	Bacteria	Proteobacteria	Alphaproteobacteria	Rhizobiales			uncultured_endolithic_bacterium
ASV607	111	15	165	154	157	51	40	37	53	41	54	45	35	13	81	1052	Bacteria{superkingdom}(100);Chloroflexi{phylum}(100);Caldilineae{class}(100);Caldilineales{order}(100);Caldilineaceae{family}(100);Litorilinea{genus}(100);Unassigned{species}(0)	Bacteria	Chloroflexi	Caldilineae	Caldilineales	Caldilineaceae	Litorilinea	Unassigned
ASV608	43	0	13	117	56	0	0	0	24	0	6	0	0	14	0	273	Bacteria{superkingdom}(84);Acidobacteria{phylum}(84);Acidobacteria_Gp3{class}(84);{order}(84);{family}(84);Gp3{genus}(84);Unassigned{species}(0)	Bacteria	Acidobacteria	Acidobacteria_Gp3			Gp3	Unassigned
ASV609	115	112	0	45	0	49	0	167	0	239	0	0	0	291	77	1095	Bacteria{superkingdom}(81);Actinobacteria{phylum}(81);Actinobacteria{class}(81);Solirubrobacterales{order}(81);Conexibacteraceae{family}(81);Conexibacter{genus}(81);Unassigned{species}(0)	Bacteria	Actinobacteria	Actinobacteria	Solirubrobacterales	Conexibacteraceae	Conexibacter	Unassigned
ASV610	0	0	0	77	138	71	159	184	127	62	77	129	170	47	92	1333	Bacteria{superkingdom}(100);Bacteroidetes{phylum}(100);Sphingobacteriia{class}(100);Sphingobacteriales{order}(100);Chitinophagaceae{family}(100);Flavitalea{genus}(100);Unassigned{species}(0)	Bacteria	Bacteroidetes	Sphingobacteriia	Sphingobacteriales	Chitinophagaceae	Flavitalea	Unassigned
ASV611	73	0	71	35	87	0	0	0	16	0	12	0	13	0	0	307	Bacteria{superkingdom}(100);Gemmatimonadetes{phylum}(100);Gemmatimonadetes{class}(100);Gemmatimonadales{order}(100);Gemmatimonadaceae{family}(100);Gemmatimonas{genus}(100);Unassigned{species}(0)	Bacteria	Gemmatimonadetes	Gemmatimonadetes	Gemmatimonadales	Gemmatimonadaceae	Gemmatimonas	Unassigned
ASV613	172	99	339	0	105	35	30	0	37	0	0	0	0	0	0	817	Bacteria{superkingdom}(100);Proteobacteria{phylum}(100);Alphaproteobacteria{class}(100);Rhizobiales{order}(100);Rhizobiaceae{family}(100);Ensifer{genus}(100);Unassigned{species}(0)	Bacteria	Proteobacteria	Alphaproteobacteria	Rhizobiales	Rhizobiaceae	Ensifer	Unassigned
ASV614	0	0	5	0	0	0	0	0	0	11	0	0	0	0	0	16	Bacteria{superkingdom}(100);Acidobacteria{phylum}(100);Acidobacteria_Gp4{class}(100);{order}(100);{family}(100);Unassigned{genus}(0);Unassigned{species}(0)	Bacteria	Acidobacteria	Acidobacteria_Gp4			Unassigned	Unassigned
ASV615	0	0	0	0	0	0	0	0	0	0	0	32	14	0	0	46	Bacteria{superkingdom}(100);Actinobacteria{phylum}(100);Unassigned{class}(0);Unassigned{order}(0);Unassigned{family}(0);Unassigned{genus}(0);Unassigned{species}(0)	Bacteria	Actinobacteria	Unassigned	Unassigned	Unassigned	Unassigned	Unassigned
ASV616	25	23	17	14	7	0	0	0	20	36	0	6	0	25	7	180	Bacteria{superkingdom}(88);Actinobacteria{phylum}(88);Actinobacteria{class}(88);Acidimicrobiales{order}(88);Acidimicrobineae_incertae_sedis{family}(88);Aciditerrimonas{genus}(88);uncultured_bacterium{species}(88)	Bacteria	Actinobacteria	Actinobacteria	Acidimicrobiales	Acidimicrobineae_incertae_sedis	Aciditerrimonas	uncultured_bacterium
ASV617	0	23	0	18	0	0	0	0	0	22	0	16	0	0	0	79	Bacteria{superkingdom}(100);Proteobacteria{phylum}(100);Alphaproteobacteria{class}(100);Rhizobiales{order}(100);Hyphomicrobiaceae{family}(100);Devosia{genus}(100);Unassigned{species}(0)	Bacteria	Proteobacteria	Alphaproteobacteria	Rhizobiales	Hyphomicrobiaceae	Devosia	Unassigned
ASV618	0	0	0	0	0	0	0	0	0	0	0	0	0	16	0	16	Bacteria{superkingdom}(100);Actinobacteria{phylum}(100);Actinobacteria{class}(100);Solirubrobacterales{order}(100);Unassigned{family}(0);Unassigned{genus}(0);Unassigned{species}(0)	Bacteria	Actinobacteria	Actinobacteria	Solirubrobacterales	Unassigned	Unassigned	Unassigned
ASV619	0	76	9	0	9	34	34	33	12	42	11	27	91	14	23	415	Bacteria{superkingdom}(99);Proteobacteria{phylum}(99);Alphaproteobacteria{class}(99);{order}(99);{family}(99);{genus}(99);uncultured_Acetobacteraceae_bacterium{species}(99)	Bacteria	Proteobacteria	Alphaproteobacteria				uncultured_Acetobacteraceae_bacterium
ASV620	0	32	0	0	0	0	41	58	36	117	54	47	213	73	43	714	Bacteria{superkingdom}(100);Acidobacteria{phylum}(100);Acidobacteria_Gp6{class}(100);{order}(100);{family}(100);Gp6{genus}(100);Unassigned{species}(0)	Bacteria	Acidobacteria	Acidobacteria_Gp6			Gp6	Unassigned
ASV622	65	0	0	0	0	0	0	0	0	91	26	102	28	111	30	453	Bacteria{superkingdom}(100);Actinobacteria{phylum}(100);Actinobacteria{class}(100);Actinomycetales{order}(100);Pseudonocardiaceae{family}(100);Lentzea{genus}(100);Unassigned{species}(0)	Bacteria	Actinobacteria	Actinobacteria	Actinomycetales	Pseudonocardiaceae	Lentzea	Unassigned
ASV623	34	279	0	0	15	0	29	105	0	48	0	0	0	0	0	510	Bacteria{superkingdom}(97);Actinobacteria{phylum}(97);Actinobacteria{class}(97);Unassigned{order}(0);Unassigned{family}(0);Unassigned{genus}(0);Unassigned{species}(0)	Bacteria	Actinobacteria	Actinobacteria	Unassigned	Unassigned	Unassigned	Unassigned
ASV624	31	50	93	0	0	0	9	0	14	15	0	0	0	0	0	212	Bacteria{superkingdom}(81);Proteobacteria{phylum}(81);Gammaproteobacteria{class}(81);Chromatiales{order}(81);Unassigned{family}(0);Unassigned{genus}(0);Unassigned{species}(0)	Bacteria	Proteobacteria	Gammaproteobacteria	Chromatiales	Unassigned	Unassigned	Unassigned
ASV625	71	106	248	0	70	55	153	0	0	0	0	0	0	0	0	703	Bacteria{superkingdom}(96);Chloroflexi{phylum}(96);Anaerolineae{class}(96);Anaerolineales{order}(96);Anaerolineaceae{family}(96);{genus}(96);uncultured_soil_bacterium{species}(96)	Bacteria	Chloroflexi	Anaerolineae	Anaerolineales	Anaerolineaceae		uncultured_soil_bacterium
ASV626	34	14	0	50	0	32	41	43	75	50	41	70	0	106	65	621	Bacteria{superkingdom}(100);Acidobacteria{phylum}(100);Acidobacteria_Gp6{class}(100);{order}(100);{family}(100);Gp6{genus}(100);Unassigned{species}(0)	Bacteria	Acidobacteria	Acidobacteria_Gp6			Gp6	Unassigned
ASV628	0	0	0	0	0	0	0	16	180	0	0	0	0	0	0	196	Bacteria{superkingdom}(93);Actinobacteria{phylum}(93);Actinobacteria{class}(93);{order}(93);{family}(93);{genus}(93);uncultured_Actinomycetales_bacterium{species}(93)	Bacteria	Actinobacteria	Actinobacteria				uncultured_Actinomycetales_bacterium
ASV630	12	0	0	0	51	44	20	50	0	63	28	32	57	28	49	434	Bacteria{superkingdom}(100);Proteobacteria{phylum}(100);Gammaproteobacteria{class}(100);Xanthomonadales{order}(100);Sinobacteraceae{family}(100);Unassigned{genus}(0);Unassigned{species}(0)	Bacteria	Proteobacteria	Gammaproteobacteria	Xanthomonadales	Sinobacteraceae	Unassigned	Unassigned
ASV631	15	0	57	0	34	0	0	0	75	0	1007	979	268	77	83	2595	Bacteria{superkingdom}(100);Actinobacteria{phylum}(100);Actinobacteria{class}(100);Solirubrobacterales{order}(100);Unassigned{family}(0);Unassigned{genus}(0);Unassigned{species}(0)	Bacteria	Actinobacteria	Actinobacteria	Solirubrobacterales	Unassigned	Unassigned	Unassigned
ASV632	0	0	0	33	109	107	0	0	0	21	27	43	21	78	0	439	Bacteria{superkingdom}(100);Proteobacteria{phylum}(100);Gammaproteobacteria{class}(100);Xanthomonadales{order}(100);Sinobacteraceae{family}(100);Steroidobacter{genus}(100);Unassigned{species}(0)	Bacteria	Proteobacteria	Gammaproteobacteria	Xanthomonadales	Sinobacteraceae	Steroidobacter	Unassigned
ASV633	0	379	104	66	253	0	255	82	0	0	65	0	179	122	169	1674	Bacteria{superkingdom}(100);Proteobacteria{phylum}(100);Alphaproteobacteria{class}(100);Rhizobiales{order}(100);Rhizobiaceae{family}(100);Rhizobium{genus}(100);Unassigned{species}(0)	Bacteria	Proteobacteria	Alphaproteobacteria	Rhizobiales	Rhizobiaceae	Rhizobium	Unassigned
ASV634	0	61	0	0	0	0	0	0	0	0	0	0	0	41	0	102	Bacteria{superkingdom}(81);Proteobacteria{phylum}(81);Alphaproteobacteria{class}(81);Rhodospirillales{order}(81);{family}(81);{genus}(81);uncultured_bacterium{species}(81)	Bacteria	Proteobacteria	Alphaproteobacteria	Rhodospirillales			uncultured_bacterium
ASV635	63	55	50	51	67	43	49	88	67	31	98	92	33	101	100	988	Bacteria{superkingdom}(98);Chloroflexi{phylum}(98);{class}(98);{order}(98);{family}(98);{genus}(98);uncultured_Firmicutes_bacterium{species}(98)	Bacteria	Chloroflexi					uncultured_Firmicutes_bacterium
ASV636	71	146	47	42	67	46	60	69	25	84	6	87	0	169	14	933	Bacteria{superkingdom}(100);Planctomycetes{phylum}(100);Planctomycetia{class}(100);Planctomycetales{order}(100);Planctomycetaceae{family}(100);Pirellula{genus}(100);Unassigned{species}(0)	Bacteria	Planctomycetes	Planctomycetia	Planctomycetales	Planctomycetaceae	Pirellula	Unassigned
ASV637	0	23	0	0	0	0	0	0	0	27	43	0	0	14	0	107	Bacteria{superkingdom}(100);Actinobacteria{phylum}(100);Actinobacteria{class}(100);Solirubrobacterales{order}(100);Unassigned{family}(0);Unassigned{genus}(0);Unassigned{species}(0)	Bacteria	Actinobacteria	Actinobacteria	Solirubrobacterales	Unassigned	Unassigned	Unassigned
ASV638	0	0	0	0	0	0	0	0	0	0	0	26	0	14	0	40	Bacteria{superkingdom}(100);Actinobacteria{phylum}(100);Actinobacteria{class}(100);Actinomycetales{order}(100);Geodermatophilaceae{family}(100);Blastococcus{genus}(100);Unassigned{species}(0)	Bacteria	Actinobacteria	Actinobacteria	Actinomycetales	Geodermatophilaceae	Blastococcus	Unassigned
ASV640	24	0	41	48	89	18	45	75	24	64	98	78	93	19	30	746	Bacteria{superkingdom}(99);Chloroflexi{phylum}(99);Unassigned{class}(0);Unassigned{order}(0);Unassigned{family}(0);Unassigned{genus}(0);Unassigned{species}(0)	Bacteria	Chloroflexi	Unassigned	Unassigned	Unassigned	Unassigned	Unassigned
ASV641	22	25	7	72	62	0	6	0	0	0	48	5	7	0	39	293	Bacteria{superkingdom}(100);Proteobacteria{phylum}(100);Alphaproteobacteria{class}(100);Rhodospirillales{order}(100);Rhodospirillaceae{family}(100);Inquilinus{genus}(100);Unassigned{species}(0)	Bacteria	Proteobacteria	Alphaproteobacteria	Rhodospirillales	Rhodospirillaceae	Inquilinus	Unassigned
ASV642	57	24	45	46	23	105	32	134	123	23	0	0	0	0	59	671	Bacteria{superkingdom}(100);Armatimonadetes{phylum}(100);Chthonomonadetes{class}(100);Chthonomonadales{order}(100);Chthonomonadaceae{family}(100);Chthonomonas/Armatimonadetes_gp3{genus}(100);Unassigned{species}(0)	Bacteria	Armatimonadetes	Chthonomonadetes	Chthonomonadales	Chthonomonadaceae	Chthonomonas/Armatimonadetes_gp3	Unassigned
ASV643	235	13	47	101	12	0	0	56	0	127	13	100	0	35	12	751	Bacteria{superkingdom}(81);Chloroflexi{phylum}(81);Thermomicrobia{class}(81);Sphaerobacterales{order}(81);Sphaerobacteraceae{family}(81);Nitrolancea{genus}(81);uncultured_bacterium{species}(81)	Bacteria	Chloroflexi	Thermomicrobia	Sphaerobacterales	Sphaerobacteraceae	Nitrolancea	uncultured_bacterium
ASV644	42	23	26	54	21	59	63	32	81	27	41	51	40	39	68	667	Bacteria{superkingdom}(100);Proteobacteria{phylum}(100);Gammaproteobacteria{class}(100);Enterobacteriales{order}(100);Enterobacteriaceae{family}(100);Escherichia/Shigella{genus}(100);Unassigned{species}(0)	Bacteria	Proteobacteria	Gammaproteobacteria	Enterobacteriales	Enterobacteriaceae	Escherichia/Shigella	Unassigned
ASV645	38	0	52	69	169	0	0	0	18	18	781	0	0	0	49	1194	Bacteria{superkingdom}(87);Chloroflexi{phylum}(87);Unassigned{class}(0);Unassigned{order}(0);Unassigned{family}(0);Unassigned{genus}(0);Unassigned{species}(0)	Bacteria	Chloroflexi	Unassigned	Unassigned	Unassigned	Unassigned	Unassigned
ASV646	62	117	119	32	64	39	66	24	54	78	26	100	64	65	74	984	Bacteria{superkingdom}(89);{phylum}(89);{class}(89);{order}(89);{family}(89);{genus}(89);uncultured_Heliobacterium_sp.{species}(89)	Bacteria						uncultured_Heliobacterium_sp.
ASV647	50	0	35	199	111	0	0	21	23	0	0	0	0	35	0	474	Bacteria{superkingdom}(100);Proteobacteria{phylum}(100);Gammaproteobacteria{class}(100);Xanthomonadales{order}(100);Sinobacteraceae{family}(100);Unassigned{genus}(0);Unassigned{species}(0)	Bacteria	Proteobacteria	Gammaproteobacteria	Xanthomonadales	Sinobacteraceae	Unassigned	Unassigned
ASV648	0	0	0	0	0	0	0	0	0	0	0	51	0	34	16	101	Bacteria{superkingdom}(100);Actinobacteria{phylum}(100);Actinobacteria{class}(100);Actinomycetales{order}(100);Microbacteriaceae{family}(100);Unassigned{genus}(0);Unassigned{species}(0)	Bacteria	Actinobacteria	Actinobacteria	Actinomycetales	Microbacteriaceae	Unassigned	Unassigned
ASV649	0	132	0	12	0	0	30	37	0	38	97	151	0	54	0	551	Bacteria{superkingdom}(95);Actinobacteria{phylum}(95);Actinobacteria{class}(95);Acidimicrobiales{order}(95);Acidimicrobineae_incertae_sedis{family}(95);Aciditerrimonas{genus}(95);Unassigned{species}(0)	Bacteria	Actinobacteria	Actinobacteria	Acidimicrobiales	Acidimicrobineae_incertae_sedis	Aciditerrimonas	Unassigned
ASV650	0	0	0	0	0	0	38	24	0	41	0	39	34	30	68	274	Bacteria{superkingdom}(100);Bacteroidetes{phylum}(100);Sphingobacteriia{class}(100);Sphingobacteriales{order}(100);Chitinophagaceae{family}(100);Segetibacter{genus}(100);Unassigned{species}(0)	Bacteria	Bacteroidetes	Sphingobacteriia	Sphingobacteriales	Chitinophagaceae	Segetibacter	Unassigned
ASV651	0	57	18	0	41	11	0	0	0	0	268	32	26	0	14	467	Bacteria{superkingdom}(100);Actinobacteria{phylum}(100);Actinobacteria{class}(100);Solirubrobacterales{order}(100);Conexibacteraceae{family}(100);Conexibacter{genus}(100);Unassigned{species}(0)	Bacteria	Actinobacteria	Actinobacteria	Solirubrobacterales	Conexibacteraceae	Conexibacter	Unassigned
ASV652	0	152	0	0	0	25	37	39	0	94	0	0	0	0	0	347	Bacteria{superkingdom}(97);Actinobacteria{phylum}(97);Actinobacteria{class}(97);Acidimicrobiales{order}(97);Acidimicrobiaceae{family}(97);Ilumatobacter{genus}(97);uncultured_soil_bacterium{species}(97)	Bacteria	Actinobacteria	Actinobacteria	Acidimicrobiales	Acidimicrobiaceae	Ilumatobacter	uncultured_soil_bacterium
ASV653	0	0	186	164	24	31	0	0	78	0	155	0	0	0	0	638	Bacteria{superkingdom}(100);Bacteroidetes{phylum}(100);Cytophagia{class}(100);Cytophagales{order}(100);Cytophagaceae{family}(100);Adhaeribacter{genus}(100);Unassigned{species}(0)	Bacteria	Bacteroidetes	Cytophagia	Cytophagales	Cytophagaceae	Adhaeribacter	Unassigned
ASV654	44	22	0	0	26	92	40	101	0	91	0	0	0	0	0	416	Bacteria{superkingdom}(98);Proteobacteria{phylum}(98);Alphaproteobacteria{class}(98);Rhizobiales{order}(98);Rhodobiaceae{family}(98);Methyloceanibacter{genus}(98);Unassigned{species}(0)	Bacteria	Proteobacteria	Alphaproteobacteria	Rhizobiales	Rhodobiaceae	Methyloceanibacter	Unassigned
ASV655	0	40	0	0	119	96	0	214	0	75	0	0	0	47	0	591	Bacteria{superkingdom}(99);Proteobacteria{phylum}(99);Alphaproteobacteria{class}(99);Rhizobiales{order}(99);Hyphomicrobiaceae{family}(99);Hyphomicrobium{genus}(99);Unassigned{species}(0)	Bacteria	Proteobacteria	Alphaproteobacteria	Rhizobiales	Hyphomicrobiaceae	Hyphomicrobium	Unassigned
ASV656	25	0	7	50	27	110	67	33	55	100	170	198	29	63	29	963	Bacteria{superkingdom}(94);Actinobacteria{phylum}(94);Actinobacteria{class}(94);Actinomycetales{order}(94);Micromonosporaceae{family}(94);Catelliglobosispora{genus}(94);Unassigned{species}(0)	Bacteria	Actinobacteria	Actinobacteria	Actinomycetales	Micromonosporaceae	Catelliglobosispora	Unassigned
ASV657	0	229	0	0	0	0	0	0	168	0	378	0	111	0	51	937	Bacteria{superkingdom}(90);Actinobacteria{phylum}(90);Actinobacteria{class}(90);Solirubrobacterales{order}(90);{family}(90);{genus}(90);Unassigned{species}(0)	Bacteria	Actinobacteria	Actinobacteria	Solirubrobacterales			Unassigned
ASV658	0	0	0	0	0	0	0	0	0	0	0	10	0	16	0	26	Bacteria{superkingdom}(100);Chloroflexi{phylum}(100);Chloroflexia{class}(100);Unassigned{order}(0);Unassigned{family}(0);Unassigned{genus}(0);Unassigned{species}(0)	Bacteria	Chloroflexi	Chloroflexia	Unassigned	Unassigned	Unassigned	Unassigned
ASV659	0	0	0	0	22	170	118	200	89	202	436	782	1554	54	27	3654	Bacteria{superkingdom}(100);Bacteroidetes{phylum}(100);Sphingobacteriia{class}(100);Sphingobacteriales{order}(100);Chitinophagaceae{family}(100);Unassigned{genus}(0);Unassigned{species}(0)	Bacteria	Bacteroidetes	Sphingobacteriia	Sphingobacteriales	Chitinophagaceae	Unassigned	Unassigned
ASV660	34	0	138	0	52	82	200	74	80	261	114	0	0	0	168	1203	Bacteria{superkingdom}(100);Planctomycetes{phylum}(100);Planctomycetia{class}(100);Planctomycetales{order}(100);Planctomycetaceae{family}(100);Gimesia{genus}(100);Unassigned{species}(0)	Bacteria	Planctomycetes	Planctomycetia	Planctomycetales	Planctomycetaceae	Gimesia	Unassigned
ASV662	0	0	0	0	0	0	0	0	0	0	0	8	0	10	0	18	Bacteria{superkingdom}(93);Chloroflexi{phylum}(93);Thermomicrobia{class}(93);Sphaerobacterales{order}(93);Sphaerobacteraceae{family}(93);{genus}(93);Unassigned{species}(0)	Bacteria	Chloroflexi	Thermomicrobia	Sphaerobacterales	Sphaerobacteraceae		Unassigned
ASV663	0	4520	13	44	0	0	0	0	0	0	15	0	10	0	0	4602	Bacteria{superkingdom}(99);Proteobacteria{phylum}(99);Gammaproteobacteria{class}(99);Pseudomonadales{order}(99);Pseudomonadaceae{family}(99);Azotobacter{genus}(99);Unassigned{species}(0)	Bacteria	Proteobacteria	Gammaproteobacteria	Pseudomonadales	Pseudomonadaceae	Azotobacter	Unassigned
ASV664	199	0	27	37	17	139	53	21	85	203	49	20	0	32	54	936	Bacteria{superkingdom}(89);Actinobacteria{phylum}(89);Actinobacteria{class}(89);Solirubrobacterales{order}(89);Conexibacteraceae{family}(89);Conexibacter{genus}(89);uncultured_bacterium{species}(89)	Bacteria	Actinobacteria	Actinobacteria	Solirubrobacterales	Conexibacteraceae	Conexibacter	uncultured_bacterium
ASV665	42	288	56	0	0	10	0	0	0	18	0	0	0	0	0	414	Bacteria{superkingdom}(100);Unassigned{phylum}(0);Unassigned{class}(0);Unassigned{order}(0);Unassigned{family}(0);Unassigned{genus}(0);Unassigned{species}(0)	Bacteria	Unassigned	Unassigned	Unassigned	Unassigned	Unassigned	Unassigned
ASV666	0	177	0	0	0	0	0	0	0	0	0	0	0	0	0	177	Bacteria{superkingdom}(100);Actinobacteria{phylum}(100);Actinobacteria{class}(100);Rubrobacterales{order}(100);Rubrobacteraceae{family}(100);Rubrobacter{genus}(100);Unassigned{species}(0)	Bacteria	Actinobacteria	Actinobacteria	Rubrobacterales	Rubrobacteraceae	Rubrobacter	Unassigned
ASV667	72	70	145	166	0	0	0	0	0	129	0	265	33	0	16	896	Bacteria{superkingdom}(94);Chloroflexi{phylum}(94);Thermomicrobia{class}(94);Sphaerobacterales{order}(94);Sphaerobacteraceae{family}(94);{genus}(94);uncultured_Thermomicrobium_sp.{species}(94)	Bacteria	Chloroflexi	Thermomicrobia	Sphaerobacterales	Sphaerobacteraceae		uncultured_Thermomicrobium_sp.
ASV668	33	0	0	105	73	47	0	30	38	0	77	24	0	0	0	427	Bacteria{superkingdom}(100);Proteobacteria{phylum}(100);Alphaproteobacteria{class}(100);Rhodospirillales{order}(100);{family}(100);Reyranella{genus}(100);Unassigned{species}(0)	Bacteria	Proteobacteria	Alphaproteobacteria	Rhodospirillales		Reyranella	Unassigned
ASV669	0	27	0	0	0	0	0	0	0	58	0	38	12	44	0	179	Bacteria{superkingdom}(97);Proteobacteria{phylum}(97);Alphaproteobacteria{class}(97);Rhodobacterales{order}(97);Rhodobacteraceae{family}(97);Paracoccus{genus}(97);Unassigned{species}(0)	Bacteria	Proteobacteria	Alphaproteobacteria	Rhodobacterales	Rhodobacteraceae	Paracoccus	Unassigned
ASV670	12	0	3	23	0	0	0	107	299	19	61	28	274	78	38	942	Bacteria{superkingdom}(100);Bacteroidetes{phylum}(100);Sphingobacteriia{class}(100);Sphingobacteriales{order}(100);Chitinophagaceae{family}(100);Unassigned{genus}(0);Unassigned{species}(0)	Bacteria	Bacteroidetes	Sphingobacteriia	Sphingobacteriales	Chitinophagaceae	Unassigned	Unassigned
ASV671	0	40	57	74	54	0	0	62	0	0	220	0	0	0	0	507	Bacteria{superkingdom}(86);Actinobacteria{phylum}(86);Actinobacteria{class}(86);Acidimicrobiales{order}(86);Iamiaceae{family}(86);{genus}(86);Unassigned{species}(0)	Bacteria	Actinobacteria	Actinobacteria	Acidimicrobiales	Iamiaceae		Unassigned
ASV673	60	11	48	47	88	32	14	60	28	50	144	70	73	53	130	908	Bacteria{superkingdom}(100);Proteobacteria{phylum}(100);Alphaproteobacteria{class}(100);Rhizobiales{order}(100);Hyphomicrobiaceae{family}(100);Devosia{genus}(100);Unassigned{species}(0)	Bacteria	Proteobacteria	Alphaproteobacteria	Rhizobiales	Hyphomicrobiaceae	Devosia	Unassigned
ASV674	0	0	0	4	0	0	0	0	3	0	0	0	0	0	0	7	Bacteria{superkingdom}(95);Bacteroidetes{phylum}(95);Cytophagia{class}(95);Cytophagales{order}(95);Cytophagaceae{family}(95);Nibrella{genus}(95);uncultured_bacterium{species}(95)	Bacteria	Bacteroidetes	Cytophagia	Cytophagales	Cytophagaceae	Nibrella	uncultured_bacterium
ASV675	146	56	121	0	29	102	47	109	0	139	0	0	0	21	22	792	Bacteria{superkingdom}(93);Actinobacteria{phylum}(93);Actinobacteria{class}(93);Solirubrobacterales{order}(93);{family}(93);{genus}(93);Unassigned{species}(0)	Bacteria	Actinobacteria	Actinobacteria	Solirubrobacterales			Unassigned
ASV676	0	0	0	0	0	0	0	0	0	9	0	46	13	0	0	68	Bacteria{superkingdom}(100);Proteobacteria{phylum}(100);Alphaproteobacteria{class}(100);Rhizobiales{order}(100);Methylobacteriaceae{family}(100);Methylobacterium{genus}(100);Unassigned{species}(0)	Bacteria	Proteobacteria	Alphaproteobacteria	Rhizobiales	Methylobacteriaceae	Methylobacterium	Unassigned
ASV677	0	388	79	62	92	0	0	0	0	0	0	0	0	0	0	621	Bacteria{superkingdom}(86);Actinobacteria{phylum}(86);Actinobacteria{class}(86);Solirubrobacterales{order}(86);Conexibacteraceae{family}(86);Conexibacter{genus}(86);uncultured_Thermoleophilum_sp.{species}(86)	Bacteria	Actinobacteria	Actinobacteria	Solirubrobacterales	Conexibacteraceae	Conexibacter	uncultured_Thermoleophilum_sp.
ASV678	0	35	19	17	10	14	20	46	25	21	0	0	22	8	17	254	Bacteria{superkingdom}(100);Proteobacteria{phylum}(100);Alphaproteobacteria{class}(100);Rhodospirillales{order}(100);{family}(100);{genus}(100);uncultured_Maricaulis_sp.{species}(100)	Bacteria	Proteobacteria	Alphaproteobacteria	Rhodospirillales			uncultured_Maricaulis_sp.
ASV679	0	0	0	0	0	0	0	0	0	0	0	305	0	0	0	305	Bacteria{superkingdom}(82);Proteobacteria{phylum}(82);Deltaproteobacteria{class}(82);Myxococcales{order}(82);Cystobacteraceae{family}(82);Cystobacter{genus}(82);Cystobacter_fuscus{species}(82)	Bacteria	Proteobacteria	Deltaproteobacteria	Myxococcales	Cystobacteraceae	Cystobacter	Cystobacter_fuscus
ASV680	0	0	0	0	0	0	0	0	0	60	0	64	0	41	0	165	Bacteria{superkingdom}(100);Proteobacteria{phylum}(100);Alphaproteobacteria{class}(100);Rhizobiales{order}(100);Bradyrhizobiaceae{family}(100);Unassigned{genus}(0);Unassigned{species}(0)	Bacteria	Proteobacteria	Alphaproteobacteria	Rhizobiales	Bradyrhizobiaceae	Unassigned	Unassigned
ASV682	43	24	32	119	32	43	37	85	41	88	31	92	25	24	49	765	Bacteria{superkingdom}(94);candidate_division_WPS-1{phylum}(94);{class}(94);{order}(94);{family}(94);WPS-1_genera_incertae_sedis{genus}(94);uncultured_bacterium{species}(94)	Bacteria	candidate_division_WPS-1				WPS-1_genera_incertae_sedis	uncultured_bacterium
ASV683	0	11	0	37	17	25	31	55	30	142	0	32	0	22	35	437	Bacteria{superkingdom}(100);Gemmatimonadetes{phylum}(100);Gemmatimonadetes{class}(100);Gemmatimonadales{order}(100);Gemmatimonadaceae{family}(100);Gemmatimonas{genus}(100);Unassigned{species}(0)	Bacteria	Gemmatimonadetes	Gemmatimonadetes	Gemmatimonadales	Gemmatimonadaceae	Gemmatimonas	Unassigned
ASV684	27	40	58	9	19	140	65	82	21	40	12	23	50	0	25	611	Bacteria{superkingdom}(82);Proteobacteria{phylum}(82);Alphaproteobacteria{class}(82);Rhodospirillales{order}(82);{family}(82);{genus}(82);uncultured_bacterium{species}(82)	Bacteria	Proteobacteria	Alphaproteobacteria	Rhodospirillales			uncultured_bacterium
ASV685	0	0	0	0	0	0	0	0	0	0	0	54	0	0	0	54	Bacteria{superkingdom}(100);Actinobacteria{phylum}(100);Actinobacteria{class}(100);Actinomycetales{order}(100);Nocardioidaceae{family}(100);Nocardioides{genus}(100);Unassigned{species}(0)	Bacteria	Actinobacteria	Actinobacteria	Actinomycetales	Nocardioidaceae	Nocardioides	Unassigned
ASV686	0	59	37	0	0	198	0	0	96	0	0	0	493	0	526	1409	Bacteria{superkingdom}(99);Actinobacteria{phylum}(99);Actinobacteria{class}(99);{order}(99);{family}(99);{genus}(99);uncultured_Actinomycetales_bacterium{species}(99)	Bacteria	Actinobacteria	Actinobacteria				uncultured_Actinomycetales_bacterium
ASV687	0	47	0	0	0	0	0	0	0	0	0	0	0	0	0	47	Bacteria{superkingdom}(99);Bacteroidetes{phylum}(99);Sphingobacteriia{class}(99);Sphingobacteriales{order}(99);Chitinophagaceae{family}(99);Segetibacter{genus}(99);uncultured_bacterium{species}(99)	Bacteria	Bacteroidetes	Sphingobacteriia	Sphingobacteriales	Chitinophagaceae	Segetibacter	uncultured_bacterium
ASV689	0	0	0	0	0	0	0	0	0	0	0	0	0	23	0	23	Bacteria{superkingdom}(100);Chloroflexi{phylum}(100);Chloroflexia{class}(100);Kallotenuales{order}(100);Kallotenuaceae{family}(100);Kallotenue{genus}(100);uncultured_bacterium{species}(100)	Bacteria	Chloroflexi	Chloroflexia	Kallotenuales	Kallotenuaceae	Kallotenue	uncultured_bacterium
ASV690	0	198	0	0	0	0	0	0	12	54	39	112	43	53	0	511	Bacteria{superkingdom}(100);Actinobacteria{phylum}(100);Unassigned{class}(0);Unassigned{order}(0);Unassigned{family}(0);Unassigned{genus}(0);Unassigned{species}(0)	Bacteria	Actinobacteria	Unassigned	Unassigned	Unassigned	Unassigned	Unassigned
ASV691	0	0	0	0	0	0	21	49	0	44	0	0	0	43	0	157	Bacteria{superkingdom}(100);{phylum}(100);{class}(100);{order}(100);{family}(100);{genus}(100);uncultured_candidate_division_WYO_bacterium{species}(100)	Bacteria						uncultured_candidate_division_WYO_bacterium
ASV693	0	0	0	0	0	0	0	0	0	0	0	31	0	0	0	31	Bacteria{superkingdom}(98);Chloroflexi{phylum}(98);Chloroflexia{class}(98);Kallotenuales{order}(98);Kallotenuaceae{family}(98);Kallotenue{genus}(98);uncultured_bacterium{species}(98)	Bacteria	Chloroflexi	Chloroflexia	Kallotenuales	Kallotenuaceae	Kallotenue	uncultured_bacterium
ASV694	38	195	36	26	0	0	81	23	53	58	0	0	0	235	30	775	Bacteria{superkingdom}(100);Actinobacteria{phylum}(100);Actinobacteria{class}(100);Actinomycetales{order}(100);Streptomycetaceae{family}(100);Streptomyces{genus}(100);Unassigned{species}(0)	Bacteria	Actinobacteria	Actinobacteria	Actinomycetales	Streptomycetaceae	Streptomyces	Unassigned
ASV695	0	0	0	0	0	0	0	0	0	16	0	16	38	33	0	103	Bacteria{superkingdom}(100);Proteobacteria{phylum}(100);Alphaproteobacteria{class}(100);Rhodobacterales{order}(100);Rhodobacteraceae{family}(100);Rubellimicrobium{genus}(100);Unassigned{species}(0)	Bacteria	Proteobacteria	Alphaproteobacteria	Rhodobacterales	Rhodobacteraceae	Rubellimicrobium	Unassigned
ASV697	0	4	0	0	0	0	0	0	0	0	0	6	0	16	0	26	Bacteria{superkingdom}(100);Bacteroidetes{phylum}(100);Sphingobacteriia{class}(100);Sphingobacteriales{order}(100);Chitinophagaceae{family}(100);{genus}(100);Unassigned{species}(0)	Bacteria	Bacteroidetes	Sphingobacteriia	Sphingobacteriales	Chitinophagaceae		Unassigned
ASV698	0	0	0	0	0	0	0	0	0	0	0	0	0	29	0	29	Bacteria{superkingdom}(99);Actinobacteria{phylum}(99);Actinobacteria{class}(99);Actinomycetales{order}(99);Geodermatophilaceae{family}(99);Modestobacter{genus}(99);Unassigned{species}(0)	Bacteria	Actinobacteria	Actinobacteria	Actinomycetales	Geodermatophilaceae	Modestobacter	Unassigned
ASV700	27	91	28	26	25	72	110	93	17	248	56	227	190	77	117	1404	Bacteria{superkingdom}(100);Proteobacteria{phylum}(100);Alphaproteobacteria{class}(100);Rhizobiales{order}(100);Methylobacteriaceae{family}(100);Microvirga{genus}(100);Unassigned{species}(0)	Bacteria	Proteobacteria	Alphaproteobacteria	Rhizobiales	Methylobacteriaceae	Microvirga	Unassigned
ASV701	15	0	29	0	0	0	0	42	60	48	53	166	173	80	59	725	Bacteria{superkingdom}(100);Chloroflexi{phylum}(100);Chloroflexia{class}(100);Kallotenuales{order}(100);Kallotenuaceae{family}(100);Kallotenue{genus}(100);Unassigned{species}(0)	Bacteria	Chloroflexi	Chloroflexia	Kallotenuales	Kallotenuaceae	Kallotenue	Unassigned
ASV702	27	0	32	65	69	30	35	37	51	37	10	38	9	13	44	497	Bacteria{superkingdom}(95);Acidobacteria{phylum}(95);Acidobacteria_Gp6{class}(95);{order}(95);{family}(95);Gp6{genus}(95);agricultural_soil_bacterium_SC-I-9{species}(95)	Bacteria	Acidobacteria	Acidobacteria_Gp6			Gp6	agricultural_soil_bacterium_SC-I-9
ASV703	33	50	0	15	8	41	130	163	41	111	0	9	0	0	0	601	Bacteria{superkingdom}(91);Chloroflexi{phylum}(91);{class}(91);{order}(91);{family}(91);{genus}(91);uncultured_Sphaerobacter_sp.{species}(91)	Bacteria	Chloroflexi					uncultured_Sphaerobacter_sp.
ASV705	0	0	0	0	0	0	0	0	0	0	0	29	0	0	0	29	Bacteria{superkingdom}(96);Acidobacteria{phylum}(96);Acidobacteria_Gp3{class}(96);{order}(96);{family}(96);Gp3{genus}(96);Unassigned{species}(0)	Bacteria	Acidobacteria	Acidobacteria_Gp3			Gp3	Unassigned
ASV706	0	0	0	0	17	61	65	73	12	0	50	97	181	32	110	698	Bacteria{superkingdom}(100);Bacteroidetes{phylum}(100);Sphingobacteriia{class}(100);Sphingobacteriales{order}(100);Chitinophagaceae{family}(100);Segetibacter{genus}(100);Unassigned{species}(0)	Bacteria	Bacteroidetes	Sphingobacteriia	Sphingobacteriales	Chitinophagaceae	Segetibacter	Unassigned
ASV708	0	12	0	0	0	0	0	0	0	150	0	1	0	0	41	204	Bacteria{superkingdom}(100);Acidobacteria{phylum}(100);Acidobacteria_Gp10{class}(100);{order}(100);{family}(100);Gp10{genus}(100);Unassigned{species}(0)	Bacteria	Acidobacteria	Acidobacteria_Gp10			Gp10	Unassigned
ASV709	68	19	30	113	137	0	38	19	0	50	0	0	9	99	0	582	Bacteria{superkingdom}(95);Chloroflexi{phylum}(95);Unassigned{class}(0);Unassigned{order}(0);Unassigned{family}(0);Unassigned{genus}(0);Unassigned{species}(0)	Bacteria	Chloroflexi	Unassigned	Unassigned	Unassigned	Unassigned	Unassigned
ASV710	33	0	28	170	94	0	0	0	0	0	0	0	0	0	0	325	Bacteria{superkingdom}(100);Proteobacteria{phylum}(100);Gammaproteobacteria{class}(100);Xanthomonadales{order}(100);Xanthomonadaceae{family}(100);Lysobacter{genus}(100);Unassigned{species}(0)	Bacteria	Proteobacteria	Gammaproteobacteria	Xanthomonadales	Xanthomonadaceae	Lysobacter	Unassigned
ASV711	0	21	0	0	0	0	15	0	0	51	0	0	0	0	0	87	Bacteria{superkingdom}(100);Acidobacteria{phylum}(100);Acidobacteria_Gp4{class}(100);{order}(100);{family}(100);Gp4{genus}(100);Unassigned{species}(0)	Bacteria	Acidobacteria	Acidobacteria_Gp4			Gp4	Unassigned
ASV713	0	91	79	0	32	82	0	0	0	0	0	0	37	0	0	321	Bacteria{superkingdom}(100);Proteobacteria{phylum}(100);Alphaproteobacteria{class}(100);Rhodospirillales{order}(100);Rhodospirillaceae{family}(100);Constrictibacter{genus}(100);uncultured_bacterium{species}(100)	Bacteria	Proteobacteria	Alphaproteobacteria	Rhodospirillales	Rhodospirillaceae	Constrictibacter	uncultured_bacterium
ASV714	0	0	45	0	48	0	206	291	17	519	174	0	24	0	107	1431	Bacteria{superkingdom}(100);Proteobacteria{phylum}(100);Unassigned{class}(0);Unassigned{order}(0);Unassigned{family}(0);Unassigned{genus}(0);Unassigned{species}(0)	Bacteria	Proteobacteria	Unassigned	Unassigned	Unassigned	Unassigned	Unassigned
ASV715	0	0	0	21	0	0	307	199	33	70	0	0	0	0	0	630	Bacteria{superkingdom}(96);Acidobacteria{phylum}(96);Acidobacteria_Gp4{class}(96);{order}(96);{family}(96);Gp4{genus}(96);Unassigned{species}(0)	Bacteria	Acidobacteria	Acidobacteria_Gp4			Gp4	Unassigned
ASV716	0	0	0	27	0	12	0	33	0	35	0	0	66	0	0	173	Bacteria{superkingdom}(100);Actinobacteria{phylum}(100);Actinobacteria{class}(100);Acidimicrobiales{order}(100);Unassigned{family}(0);Unassigned{genus}(0);Unassigned{species}(0)	Bacteria	Actinobacteria	Actinobacteria	Acidimicrobiales	Unassigned	Unassigned	Unassigned
ASV718	126	0	191	0	75	237	124	0	99	42	0	0	0	0	38	932	Bacteria{superkingdom}(80);Chloroflexi{phylum}(80);{class}(80);{order}(80);{family}(80);{genus}(80);uncultured_soil_bacterium{species}(80)	Bacteria	Chloroflexi					uncultured_soil_bacterium
ASV719	102	0	136	35	82	0	0	0	37	0	0	0	32	29	0	453	Bacteria{superkingdom}(100);Actinobacteria{phylum}(100);Actinobacteria{class}(100);Actinomycetales{order}(100);Nocardioidaceae{family}(100);Nocardioides{genus}(100);Unassigned{species}(0)	Bacteria	Actinobacteria	Actinobacteria	Actinomycetales	Nocardioidaceae	Nocardioides	Unassigned
ASV721	0	0	0	0	0	0	21	23	0	29	21	33	0	0	0	127	Bacteria{superkingdom}(93);Actinobacteria{phylum}(93);Actinobacteria{class}(93);Actinomycetales{order}(93);Geodermatophilaceae{family}(93);Geodermatophilus{genus}(93);Unassigned{species}(0)	Bacteria	Actinobacteria	Actinobacteria	Actinomycetales	Geodermatophilaceae	Geodermatophilus	Unassigned
ASV722	0	0	0	0	3	0	0	0	0	0	0	0	0	0	0	3	Bacteria{superkingdom}(98);Chloroflexi{phylum}(98);Chloroflexia{class}(98);Kallotenuales{order}(98);Kallotenuaceae{family}(98);Kallotenue{genus}(98);uncultured_Chloroflexi_bacterium{species}(98)	Bacteria	Chloroflexi	Chloroflexia	Kallotenuales	Kallotenuaceae	Kallotenue	uncultured_Chloroflexi_bacterium
ASV724	0	0	0	0	0	8	0	0	13	25	14	21	0	0	0	81	Bacteria{superkingdom}(94);Actinobacteria{phylum}(94);Actinobacteria{class}(94);Acidimicrobiales{order}(94);Acidimicrobineae_incertae_sedis{family}(94);Aciditerrimonas{genus}(94);Unassigned{species}(0)	Bacteria	Actinobacteria	Actinobacteria	Acidimicrobiales	Acidimicrobineae_incertae_sedis	Aciditerrimonas	Unassigned
ASV725	96	0	0	0	77	0	0	0	0	0	0	0	0	0	0	173	Bacteria{superkingdom}(92);Actinobacteria{phylum}(92);Actinobacteria{class}(92);Actinomycetales{order}(92);Pseudonocardiaceae{family}(92);Actinophytocola{genus}(92);uncultured_bacterium{species}(92)	Bacteria	Actinobacteria	Actinobacteria	Actinomycetales	Pseudonocardiaceae	Actinophytocola	uncultured_bacterium
ASV726	149	0	129	39	87	114	76	95	72	36	69	23	0	25	162	1076	Bacteria{superkingdom}(100);Chloroflexi{phylum}(100);Caldilineae{class}(100);Caldilineales{order}(100);Caldilineaceae{family}(100);Litorilinea{genus}(100);Unassigned{species}(0)	Bacteria	Chloroflexi	Caldilineae	Caldilineales	Caldilineaceae	Litorilinea	Unassigned
ASV727	0	11	0	0	0	0	0	0	0	0	0	0	0	0	0	11	Bacteria{superkingdom}(91);{phylum}(91);{class}(91);{order}(91);{family}(91);{genus}(91);uncultured_Gemmatimonadetes_bacterium{species}(91)	Bacteria						uncultured_Gemmatimonadetes_bacterium
ASV728	93	53	24	36	184	80	51	31	58	11	15	14	0	47	40	737	Bacteria{superkingdom}(98);Nitrospirae{phylum}(98);Nitrospira{class}(98);Nitrospirales{order}(98);Nitrospiraceae{family}(98);Nitrospira{genus}(98);uncultured_Nitrospiraceae_bacterium{species}(98)	Bacteria	Nitrospirae	Nitrospira	Nitrospirales	Nitrospiraceae	Nitrospira	uncultured_Nitrospiraceae_bacterium
ASV729	0	23	0	0	0	0	0	0	0	0	0	0	0	0	0	23	Bacteria{superkingdom}(90);Actinobacteria{phylum}(90);Actinobacteria{class}(90);Actinomycetales{order}(90);Pseudonocardiaceae{family}(90);Amycolatopsis{genus}(90);Unassigned{species}(0)	Bacteria	Actinobacteria	Actinobacteria	Actinomycetales	Pseudonocardiaceae	Amycolatopsis	Unassigned
ASV731	0	0	0	0	0	0	364	0	0	0	71	0	0	0	129	564	Bacteria{superkingdom}(97);Actinobacteria{phylum}(97);Actinobacteria{class}(97);Solirubrobacterales{order}(97);Unassigned{family}(0);Unassigned{genus}(0);Unassigned{species}(0)	Bacteria	Actinobacteria	Actinobacteria	Solirubrobacterales	Unassigned	Unassigned	Unassigned
ASV732	0	303	0	0	0	0	1530	163	38	0	64	0	0	0	0	2098	Bacteria{superkingdom}(100);Bacteroidetes{phylum}(100);Sphingobacteriia{class}(100);Sphingobacteriales{order}(100);Chitinophagaceae{family}(100);Unassigned{genus}(0);Unassigned{species}(0)	Bacteria	Bacteroidetes	Sphingobacteriia	Sphingobacteriales	Chitinophagaceae	Unassigned	Unassigned
ASV733	0	11	40	0	18	0	0	0	40	0	0	0	0	0	106	215	Bacteria{superkingdom}(97);Actinobacteria{phylum}(97);Actinobacteria{class}(97);{order}(97);{family}(97);{genus}(97);uncultured_Actinomycetales_bacterium{species}(97)	Bacteria	Actinobacteria	Actinobacteria				uncultured_Actinomycetales_bacterium
ASV734	0	0	0	0	8	0	0	0	0	0	0	0	0	0	0	8	Bacteria{superkingdom}(94);Acidobacteria{phylum}(94);Acidobacteria_Gp4{class}(94);{order}(94);{family}(94);Blastocatella{genus}(94);Unassigned{species}(0)	Bacteria	Acidobacteria	Acidobacteria_Gp4			Blastocatella	Unassigned
ASV736	39	245	0	106	28	22	59	39	69	42	194	283	25	205	184	1540	Bacteria{superkingdom}(99);Acidobacteria{phylum}(99);Acidobacteria_Gp4{class}(99);{order}(99);{family}(99);Aridibacter{genus}(99);Unassigned{species}(0)	Bacteria	Acidobacteria	Acidobacteria_Gp4			Aridibacter	Unassigned
ASV737	0	0	0	0	0	0	64	0	0	54	0	61	42	62	0	283	Bacteria{superkingdom}(100);Proteobacteria{phylum}(100);Betaproteobacteria{class}(100);{order}(100);{family}(100);{genus}(100);Unassigned{species}(0)	Bacteria	Proteobacteria	Betaproteobacteria				Unassigned
ASV738	0	0	0	0	0	0	0	0	0	0	0	34	16	0	0	50	Bacteria{superkingdom}(100);Proteobacteria{phylum}(100);Alphaproteobacteria{class}(100);Rhizobiales{order}(100);Hyphomicrobiaceae{family}(100);Devosia{genus}(100);Unassigned{species}(0)	Bacteria	Proteobacteria	Alphaproteobacteria	Rhizobiales	Hyphomicrobiaceae	Devosia	Unassigned
ASV739	0	0	0	14	0	0	0	0	0	0	0	0	0	0	0	14	Bacteria{superkingdom}(98);Actinobacteria{phylum}(98);Actinobacteria{class}(98);Unassigned{order}(0);Unassigned{family}(0);Unassigned{genus}(0);Unassigned{species}(0)	Bacteria	Actinobacteria	Actinobacteria	Unassigned	Unassigned	Unassigned	Unassigned
ASV740	0	0	0	0	0	0	0	0	0	0	0	0	0	19	0	19	Bacteria{superkingdom}(100);Bacteroidetes{phylum}(100);Sphingobacteriia{class}(100);Sphingobacteriales{order}(100);Chitinophagaceae{family}(100);Segetibacter{genus}(100);Unassigned{species}(0)	Bacteria	Bacteroidetes	Sphingobacteriia	Sphingobacteriales	Chitinophagaceae	Segetibacter	Unassigned
ASV741	0	0	0	0	91	0	0	0	0	0	148	0	0	0	0	239	Bacteria{superkingdom}(88);Bacteroidetes{phylum}(88);Cytophagia{class}(88);Cytophagales{order}(88);{family}(88);Ohtaekwangia{genus}(88);uncultured_Bacteroidetes_bacterium{species}(88)	Bacteria	Bacteroidetes	Cytophagia	Cytophagales		Ohtaekwangia	uncultured_Bacteroidetes_bacterium
ASV742	17	0	23	114	0	17	20	51	39	0	0	0	0	12	18	311	Bacteria{superkingdom}(100);Firmicutes{phylum}(100);Bacilli{class}(100);Bacillales{order}(100);Paenibacillaceae_1{family}(100);Paenibacillus{genus}(100);Unassigned{species}(0)	Bacteria	Firmicutes	Bacilli	Bacillales	Paenibacillaceae_1	Paenibacillus	Unassigned
ASV743	40	31	0	135	0	331	87	60	240	0	92	0	0	0	39	1055	Bacteria{superkingdom}(100);Proteobacteria{phylum}(100);Betaproteobacteria{class}(100);{order}(100);{family}(100);{genus}(100);Unassigned{species}(0)	Bacteria	Proteobacteria	Betaproteobacteria				Unassigned
ASV744	0	0	0	0	0	0	0	0	0	0	0	0	0	25	0	25	Bacteria{superkingdom}(100);Actinobacteria{phylum}(100);Actinobacteria{class}(100);Actinomycetales{order}(100);Microbacteriaceae{family}(100);Agrococcus{genus}(100);Unassigned{species}(0)	Bacteria	Actinobacteria	Actinobacteria	Actinomycetales	Microbacteriaceae	Agrococcus	Unassigned
ASV745	0	0	168	53	0	0	0	0	0	0	0	0	0	59	0	280	Bacteria{superkingdom}(98);Proteobacteria{phylum}(98);Alphaproteobacteria{class}(98);Rhizobiales{order}(98);Rhizobiaceae{family}(98);Rhizobium{genus}(98);Unassigned{species}(0)	Bacteria	Proteobacteria	Alphaproteobacteria	Rhizobiales	Rhizobiaceae	Rhizobium	Unassigned
ASV746	0	53	58	55	64	0	0	16	0	0	0	0	0	0	0	246	Bacteria{superkingdom}(96);{phylum}(96);{class}(96);{order}(96);{family}(96);{genus}(96);uncultured_Anaerolineae_bacterium{species}(96)	Bacteria						uncultured_Anaerolineae_bacterium
ASV747	0	0	21	37	0	190	223	110	0	189	52	17	0	0	0	839	Bacteria{superkingdom}(100);Actinobacteria{phylum}(100);Actinobacteria{class}(100);Solirubrobacterales{order}(100);Unassigned{family}(0);Unassigned{genus}(0);Unassigned{species}(0)	Bacteria	Actinobacteria	Actinobacteria	Solirubrobacterales	Unassigned	Unassigned	Unassigned
ASV748	0	0	0	51	0	0	0	0	0	0	0	0	0	0	0	51	Bacteria{superkingdom}(100);Acidobacteria{phylum}(100);Acidobacteria_Gp7{class}(100);{order}(100);{family}(100);Gp7{genus}(100);Unassigned{species}(0)	Bacteria	Acidobacteria	Acidobacteria_Gp7			Gp7	Unassigned
ASV749	12	47	0	31	0	31	18	113	70	84	22	37	70	39	20	594	Bacteria{superkingdom}(83);Gemmatimonadetes{phylum}(83);Gemmatimonadetes{class}(83);Gemmatimonadales{order}(83);Gemmatimonadaceae{family}(83);Gemmatimonas{genus}(83);uncultured_Gemmatimonadales_bacterium{species}(83)	Bacteria	Gemmatimonadetes	Gemmatimonadetes	Gemmatimonadales	Gemmatimonadaceae	Gemmatimonas	uncultured_Gemmatimonadales_bacterium
ASV750	0	0	0	45	0	0	0	0	0	0	0	7	0	0	0	52	Bacteria{superkingdom}(100);Acidobacteria{phylum}(100);Acidobacteria_Gp7{class}(100);{order}(100);{family}(100);Gp7{genus}(100);Unassigned{species}(0)	Bacteria	Acidobacteria	Acidobacteria_Gp7			Gp7	Unassigned
ASV751	0	0	0	0	0	11	57	68	0	100	0	126	84	103	46	595	Bacteria{superkingdom}(100);Actinobacteria{phylum}(100);Actinobacteria{class}(100);Actinomycetales{order}(100);Intrasporangiaceae{family}(100);Unassigned{genus}(0);Unassigned{species}(0)	Bacteria	Actinobacteria	Actinobacteria	Actinomycetales	Intrasporangiaceae	Unassigned	Unassigned
ASV752	0	0	0	0	0	75	0	36	0	283	0	0	0	0	0	394	Bacteria{superkingdom}(80);Bacteroidetes{phylum}(80);Sphingobacteriia{class}(80);Sphingobacteriales{order}(80);Chitinophagaceae{family}(80);Flavitalea{genus}(80);uncultured_Niastella_sp.{species}(80)	Bacteria	Bacteroidetes	Sphingobacteriia	Sphingobacteriales	Chitinophagaceae	Flavitalea	uncultured_Niastella_sp.
ASV753	0	42	0	0	0	0	0	29	0	0	0	25	0	0	0	96	Bacteria{superkingdom}(98);Bacteroidetes{phylum}(98);Sphingobacteriia{class}(98);Sphingobacteriales{order}(98);Chitinophagaceae{family}(98);Segetibacter{genus}(98);uncultured_bacterium{species}(98)	Bacteria	Bacteroidetes	Sphingobacteriia	Sphingobacteriales	Chitinophagaceae	Segetibacter	uncultured_bacterium
ASV754	15	0	59	26	0	0	85	0	0	0	0	0	0	0	0	185	Bacteria{superkingdom}(100);Acidobacteria{phylum}(100);Acidobacteria_Gp10{class}(100);{order}(100);{family}(100);Gp10{genus}(100);Unassigned{species}(0)	Bacteria	Acidobacteria	Acidobacteria_Gp10			Gp10	Unassigned
ASV755	53	93	0	0	10	17	27	0	78	0	0	0	47	0	36	361	Bacteria{superkingdom}(97);Actinobacteria{phylum}(97);Actinobacteria{class}(97);Acidimicrobiales{order}(97);Acidimicrobineae_incertae_sedis{family}(97);Aciditerrimonas{genus}(97);Unassigned{species}(0)	Bacteria	Actinobacteria	Actinobacteria	Acidimicrobiales	Acidimicrobineae_incertae_sedis	Aciditerrimonas	Unassigned
ASV757	38	0	13	0	0	340	89	158	99	27	20	0	35	0	54	873	Bacteria{superkingdom}(100);Actinobacteria{phylum}(100);Unassigned{class}(0);Unassigned{order}(0);Unassigned{family}(0);Unassigned{genus}(0);Unassigned{species}(0)	Bacteria	Actinobacteria	Unassigned	Unassigned	Unassigned	Unassigned	Unassigned
ASV758	73	59	80	76	123	0	0	12	0	0	0	102	43	26	15	609	Bacteria{superkingdom}(100);Actinobacteria{phylum}(100);Actinobacteria{class}(100);Actinomycetales{order}(100);Nocardioidaceae{family}(100);Nocardioides{genus}(100);Unassigned{species}(0)	Bacteria	Actinobacteria	Actinobacteria	Actinomycetales	Nocardioidaceae	Nocardioides	Unassigned
ASV760	30	59	26	51	45	40	42	118	68	128	93	81	182	172	172	1307	Bacteria{superkingdom}(100);Proteobacteria{phylum}(100);Alphaproteobacteria{class}(100);Rhizobiales{order}(100);Rhizobiales_incertae_sedis{family}(100);Vasilyevaea{genus}(100);Unassigned{species}(0)	Bacteria	Proteobacteria	Alphaproteobacteria	Rhizobiales	Rhizobiales_incertae_sedis	Vasilyevaea	Unassigned
ASV761	78	54	22	0	21	0	15	0	0	0	0	0	0	0	0	190	Bacteria{superkingdom}(100);Armatimonadetes{phylum}(100);{class}(100);{order}(100);{family}(100);Armatimonadetes_gp4{genus}(100);Unassigned{species}(0)	Bacteria	Armatimonadetes				Armatimonadetes_gp4	Unassigned
ASV762	0	0	20	79	0	41	63	58	166	0	0	0	0	0	55	482	Bacteria{superkingdom}(100);Acidobacteria{phylum}(100);Acidobacteria_Gp6{class}(100);{order}(100);{family}(100);Gp6{genus}(100);Unassigned{species}(0)	Bacteria	Acidobacteria	Acidobacteria_Gp6			Gp6	Unassigned
ASV764	0	0	0	0	0	0	0	0	0	0	0	0	0	4	0	4	Bacteria{superkingdom}(100);Proteobacteria{phylum}(100);Betaproteobacteria{class}(100);Burkholderiales{order}(100);Oxalobacteraceae{family}(100);Unassigned{genus}(0);Unassigned{species}(0)	Bacteria	Proteobacteria	Betaproteobacteria	Burkholderiales	Oxalobacteraceae	Unassigned	Unassigned
ASV765	50	0	0	0	0	0	0	0	0	188	0	0	0	23	0	261	Bacteria{superkingdom}(94);Bacteroidetes{phylum}(94);Cytophagia{class}(94);Cytophagales{order}(94);{family}(94);Chryseolinea{genus}(94);Unassigned{species}(0)	Bacteria	Bacteroidetes	Cytophagia	Cytophagales		Chryseolinea	Unassigned
ASV766	0	0	7	0	0	0	0	0	0	0	0	0	0	0	0	7	Bacteria{superkingdom}(88);Chloroflexi{phylum}(88);Unassigned{class}(0);Unassigned{order}(0);Unassigned{family}(0);Unassigned{genus}(0);Unassigned{species}(0)	Bacteria	Chloroflexi	Unassigned	Unassigned	Unassigned	Unassigned	Unassigned
ASV767	55	0	10	145	0	19	0	0	167	81	165	161	160	0	66	1029	Bacteria{superkingdom}(100);Nitrospirae{phylum}(100);Nitrospira{class}(100);Nitrospirales{order}(100);Nitrospiraceae{family}(100);Nitrospira{genus}(100);Unassigned{species}(0)	Bacteria	Nitrospirae	Nitrospira	Nitrospirales	Nitrospiraceae	Nitrospira	Unassigned
ASV768	34	0	49	81	0	0	0	0	75	0	0	0	0	0	0	239	Bacteria{superkingdom}(86);Actinobacteria{phylum}(86);Actinobacteria{class}(86);Actinomycetales{order}(86);Nocardioidaceae{family}(86);{genus}(86);Unassigned{species}(0)	Bacteria	Actinobacteria	Actinobacteria	Actinomycetales	Nocardioidaceae		Unassigned
ASV769	0	0	0	0	0	0	0	0	0	0	0	22	30	8	0	60	Bacteria{superkingdom}(100);Actinobacteria{phylum}(100);Actinobacteria{class}(100);Actinomycetales{order}(100);Nocardioidaceae{family}(100);Nocardioides{genus}(100);Unassigned{species}(0)	Bacteria	Actinobacteria	Actinobacteria	Actinomycetales	Nocardioidaceae	Nocardioides	Unassigned
ASV770	0	0	0	23	0	17	0	83	28	0	34	0	0	0	0	185	Bacteria{superkingdom}(100);Armatimonadetes{phylum}(100);{class}(100);{order}(100);{family}(100);Armatimonadetes_gp4{genus}(100);Unassigned{species}(0)	Bacteria	Armatimonadetes				Armatimonadetes_gp4	Unassigned
ASV771	0	33	0	0	0	143	0	0	0	38	0	0	0	0	0	214	Bacteria{superkingdom}(99);Proteobacteria{phylum}(99);Gammaproteobacteria{class}(99);Pseudomonadales{order}(99);Pseudomonadaceae{family}(99);Pseudomonas{genus}(99);Unassigned{species}(0)	Bacteria	Proteobacteria	Gammaproteobacteria	Pseudomonadales	Pseudomonadaceae	Pseudomonas	Unassigned
ASV772	0	23	0	0	7	0	0	9	0	18	0	13	0	5	0	75	Bacteria{superkingdom}(100);{phylum}(100);{class}(100);{order}(100);{family}(100);{genus}(100);uncultured_candidate_division_WYO_bacterium{species}(100)	Bacteria						uncultured_candidate_division_WYO_bacterium
ASV774	16	0	43	33	0	67	50	207	60	108	0	0	0	0	0	584	Bacteria{superkingdom}(100);{phylum}(100);{class}(100);{order}(100);{family}(100);{genus}(100);uncultured_Cytophaga_sp.{species}(100)	Bacteria						uncultured_Cytophaga_sp.
ASV775	0	6	0	0	0	0	0	0	0	0	0	0	0	59	0	65	Bacteria{superkingdom}(81);Bacteroidetes{phylum}(81);Cytophagia{class}(81);Cytophagales{order}(81);Cytophagaceae{family}(81);Adhaeribacter{genus}(81);uncultured_bacterium{species}(81)	Bacteria	Bacteroidetes	Cytophagia	Cytophagales	Cytophagaceae	Adhaeribacter	uncultured_bacterium
ASV776	0	21	0	0	0	0	0	0	9	61	9	0	0	11	0	111	Bacteria{superkingdom}(100);Bacteroidetes{phylum}(100);Sphingobacteriia{class}(100);Sphingobacteriales{order}(100);Chitinophagaceae{family}(100);Segetibacter{genus}(100);Unassigned{species}(0)	Bacteria	Bacteroidetes	Sphingobacteriia	Sphingobacteriales	Chitinophagaceae	Segetibacter	Unassigned
ASV777	35	0	25	0	63	154	140	197	46	77	194	133	0	110	110	1284	Bacteria{superkingdom}(100);Planctomycetes{phylum}(100);Planctomycetia{class}(100);Planctomycetales{order}(100);Planctomycetaceae{family}(100);Unassigned{genus}(0);Unassigned{species}(0)	Bacteria	Planctomycetes	Planctomycetia	Planctomycetales	Planctomycetaceae	Unassigned	Unassigned
ASV778	0	0	0	0	0	0	0	0	0	138	0	0	0	0	0	138	Bacteria{superkingdom}(99);Acidobacteria{phylum}(99);Acidobacteria_Gp4{class}(99);{order}(99);{family}(99);Gp4{genus}(99);Unassigned{species}(0)	Bacteria	Acidobacteria	Acidobacteria_Gp4			Gp4	Unassigned
ASV780	57	16	39	8	45	48	69	30	32	65	35	57	96	28	0	625	Bacteria{superkingdom}(99);Actinobacteria{phylum}(99);Actinobacteria{class}(99);Gaiellales{order}(99);Gaiellaceae{family}(99);Gaiella{genus}(99);uncultured_Actinomycetales_bacterium{species}(99)	Bacteria	Actinobacteria	Actinobacteria	Gaiellales	Gaiellaceae	Gaiella	uncultured_Actinomycetales_bacterium
ASV781	31	255	0	28	25	25	41	67	43	73	57	39	172	110	38	1004	Bacteria{superkingdom}(100);Acidobacteria{phylum}(100);Acidobacteria_Gp6{class}(100);{order}(100);{family}(100);Gp6{genus}(100);Unassigned{species}(0)	Bacteria	Acidobacteria	Acidobacteria_Gp6			Gp6	Unassigned
ASV783	43	27	18	39	119	29	19	32	30	180	41	106	62	47	60	852	Bacteria{superkingdom}(100);Proteobacteria{phylum}(100);Alphaproteobacteria{class}(100);Rhizobiales{order}(100);Hyphomicrobiaceae{family}(100);Devosia{genus}(100);Unassigned{species}(0)	Bacteria	Proteobacteria	Alphaproteobacteria	Rhizobiales	Hyphomicrobiaceae	Devosia	Unassigned
ASV784	0	0	0	23	0	54	16	40	85	37	0	30	0	0	55	340	Bacteria{superkingdom}(96);Chloroflexi{phylum}(96);Chloroflexia{class}(96);Kallotenuales{order}(96);Kallotenuaceae{family}(96);Kallotenue{genus}(96);uncultured_bacterium{species}(96)	Bacteria	Chloroflexi	Chloroflexia	Kallotenuales	Kallotenuaceae	Kallotenue	uncultured_bacterium
ASV785	0	0	0	67	0	0	0	75	0	0	0	0	0	0	0	142	Bacteria{superkingdom}(97);Actinobacteria{phylum}(97);Actinobacteria{class}(97);Actinomycetales{order}(97);Micrococcaceae{family}(97);Arthrobacter{genus}(97);Unassigned{species}(0)	Bacteria	Actinobacteria	Actinobacteria	Actinomycetales	Micrococcaceae	Arthrobacter	Unassigned
ASV786	0	24	0	0	22	25	73	45	19	74	431	102	140	172	0	1127	Bacteria{superkingdom}(100);Bacteroidetes{phylum}(100);Sphingobacteriia{class}(100);Sphingobacteriales{order}(100);Chitinophagaceae{family}(100);Unassigned{genus}(0);Unassigned{species}(0)	Bacteria	Bacteroidetes	Sphingobacteriia	Sphingobacteriales	Chitinophagaceae	Unassigned	Unassigned
ASV787	0	6	0	0	0	0	0	0	0	0	9	0	0	0	0	15	Bacteria{superkingdom}(100);Proteobacteria{phylum}(100);Alphaproteobacteria{class}(100);Rhodobacterales{order}(100);Rhodobacteraceae{family}(100);Rubellimicrobium{genus}(100);uncultured_bacterium{species}(100)	Bacteria	Proteobacteria	Alphaproteobacteria	Rhodobacterales	Rhodobacteraceae	Rubellimicrobium	uncultured_bacterium
ASV788	45	22	0	0	0	28	88	23	0	0	0	0	0	46	0	252	Bacteria{superkingdom}(100);Acidobacteria{phylum}(100);Acidobacteria_Gp6{class}(100);{order}(100);{family}(100);Gp6{genus}(100);Unassigned{species}(0)	Bacteria	Acidobacteria	Acidobacteria_Gp6			Gp6	Unassigned
ASV789	0	0	0	57	0	0	0	0	48	0	0	0	0	0	22	127	Bacteria{superkingdom}(100);Acidobacteria{phylum}(100);Acidobacteria_Gp6{class}(100);{order}(100);{family}(100);Gp6{genus}(100);Unassigned{species}(0)	Bacteria	Acidobacteria	Acidobacteria_Gp6			Gp6	Unassigned
ASV790	51	0	0	46	107	26	81	144	111	97	52	58	81	89	60	1003	Bacteria{superkingdom}(99);Proteobacteria{phylum}(99);Alphaproteobacteria{class}(99);Rhizobiales{order}(99);{family}(99);{genus}(99);uncultured_Nordella_sp.{species}(99)	Bacteria	Proteobacteria	Alphaproteobacteria	Rhizobiales			uncultured_Nordella_sp.
ASV791	0	0	0	0	0	0	0	0	0	0	0	90	0	0	0	90	Bacteria{superkingdom}(100);Actinobacteria{phylum}(100);Actinobacteria{class}(100);Actinomycetales{order}(100);Pseudonocardiaceae{family}(100);Lentzea{genus}(100);Unassigned{species}(0)	Bacteria	Actinobacteria	Actinobacteria	Actinomycetales	Pseudonocardiaceae	Lentzea	Unassigned
ASV792	0	0	22	0	43	39	161	243	0	279	0	0	0	0	0	787	Bacteria{superkingdom}(100);Proteobacteria{phylum}(100);Alphaproteobacteria{class}(100);Rhizobiales{order}(100);Xanthobacteraceae{family}(100);Pseudolabrys{genus}(100);Unassigned{species}(0)	Bacteria	Proteobacteria	Alphaproteobacteria	Rhizobiales	Xanthobacteraceae	Pseudolabrys	Unassigned
ASV793	0	18	11	9	0	79	23	158	22	27	54	22	89	30	24	566	Bacteria{superkingdom}(100);Bacteroidetes{phylum}(100);Sphingobacteriia{class}(100);Sphingobacteriales{order}(100);Chitinophagaceae{family}(100);Segetibacter{genus}(100);Unassigned{species}(0)	Bacteria	Bacteroidetes	Sphingobacteriia	Sphingobacteriales	Chitinophagaceae	Segetibacter	Unassigned
ASV794	34	0	0	0	46	79	89	112	57	110	84	225	0	99	96	1031	Bacteria{superkingdom}(96);Chloroflexi{phylum}(96);Thermomicrobia{class}(96);Sphaerobacterales{order}(96);Sphaerobacteraceae{family}(96);{genus}(96);Unassigned{species}(0)	Bacteria	Chloroflexi	Thermomicrobia	Sphaerobacterales	Sphaerobacteraceae		Unassigned
ASV796	134	32	18	51	137	70	27	28	0	10	147	0	49	0	134	837	Bacteria{superkingdom}(86);Bacteroidetes{phylum}(86);Sphingobacteriia{class}(86);Sphingobacteriales{order}(86);Chitinophagaceae{family}(86);Niastella{genus}(86);uncultured_bacterium{species}(86)	Bacteria	Bacteroidetes	Sphingobacteriia	Sphingobacteriales	Chitinophagaceae	Niastella	uncultured_bacterium
ASV797	40	0	31	0	36	161	51	0	0	0	14	0	0	0	0	333	Bacteria{superkingdom}(85);Verrucomicrobia{phylum}(85);Opitutae{class}(85);Opitutales{order}(85);Opitutaceae{family}(85);Opitutus{genus}(85);uncultured_Opitutaceae_bacterium{species}(85)	Bacteria	Verrucomicrobia	Opitutae	Opitutales	Opitutaceae	Opitutus	uncultured_Opitutaceae_bacterium
ASV798	0	0	0	0	0	688	331	384	0	0	0	0	0	0	0	1403	Bacteria{superkingdom}(100);Proteobacteria{phylum}(100);Alphaproteobacteria{class}(100);Rhizobiales{order}(100);Methylobacteriaceae{family}(100);Microvirga{genus}(100);Unassigned{species}(0)	Bacteria	Proteobacteria	Alphaproteobacteria	Rhizobiales	Methylobacteriaceae	Microvirga	Unassigned
ASV799	0	0	0	0	0	0	0	3540	0	0	0	0	0	0	0	3540	Bacteria{superkingdom}(99);Acidobacteria{phylum}(99);Acidobacteria_Gp4{class}(99);{order}(99);{family}(99);Gp4{genus}(99);Unassigned{species}(0)	Bacteria	Acidobacteria	Acidobacteria_Gp4			Gp4	Unassigned
ASV800	0	0	0	0	4	0	0	0	0	0	0	0	0	0	0	4	Bacteria{superkingdom}(100);Cyanobacteria/Chloroplast{phylum}(100);Cyanobacteria{class}(100);{order}(100);Family_I{family}(100);GpI{genus}(100);Microcoleus_cf._chthonoplastes_Es_Yyy1100{species}(100)	Bacteria	Cyanobacteria/Chloroplast	Cyanobacteria		Family_I	GpI	Microcoleus_cf._chthonoplastes_Es_Yyy1100
ASV801	0	0	0	42	0	0	0	0	0	0	0	0	0	0	0	42	Bacteria{superkingdom}(100);Actinobacteria{phylum}(100);Actinobacteria{class}(100);Actinomycetales{order}(100);Streptomycetaceae{family}(100);Streptomyces{genus}(100);Unassigned{species}(0)	Bacteria	Actinobacteria	Actinobacteria	Actinomycetales	Streptomycetaceae	Streptomyces	Unassigned
ASV802	0	91	0	0	0	0	0	74	30	35	13	0	0	0	0	243	Bacteria{superkingdom}(89);Actinobacteria{phylum}(89);Actinobacteria{class}(89);Acidimicrobiales{order}(89);Acidimicrobineae_incertae_sedis{family}(89);Aciditerrimonas{genus}(89);uncultured_bacterium{species}(89)	Bacteria	Actinobacteria	Actinobacteria	Acidimicrobiales	Acidimicrobineae_incertae_sedis	Aciditerrimonas	uncultured_bacterium
ASV803	0	88	0	0	0	0	0	14	10	45	0	67	34	167	13	438	Bacteria{superkingdom}(100);Chloroflexi{phylum}(100);Chloroflexia{class}(100);Kallotenuales{order}(100);Kallotenuaceae{family}(100);Kallotenue{genus}(100);uncultured_bacterium{species}(100)	Bacteria	Chloroflexi	Chloroflexia	Kallotenuales	Kallotenuaceae	Kallotenue	uncultured_bacterium
ASV804	0	0	0	90	0	0	50	66	81	73	209	0	0	0	0	569	Bacteria{superkingdom}(100);Proteobacteria{phylum}(100);Gammaproteobacteria{class}(100);Xanthomonadales{order}(100);Sinobacteraceae{family}(100);Steroidobacter{genus}(100);Unassigned{species}(0)	Bacteria	Proteobacteria	Gammaproteobacteria	Xanthomonadales	Sinobacteraceae	Steroidobacter	Unassigned
ASV805	0	0	0	0	0	0	15	39	0	0	0	0	0	0	0	54	Bacteria{superkingdom}(100);Acidobacteria{phylum}(100);Acidobacteria_Gp4{class}(100);{order}(100);{family}(100);Gp4{genus}(100);Unassigned{species}(0)	Bacteria	Acidobacteria	Acidobacteria_Gp4			Gp4	Unassigned
ASV806	0	50	0	0	85	0	0	17	0	0	0	0	0	0	0	152	Bacteria{superkingdom}(100);Acidobacteria{phylum}(100);Acidobacteria_Gp4{class}(100);{order}(100);{family}(100);Gp4{genus}(100);Unassigned{species}(0)	Bacteria	Acidobacteria	Acidobacteria_Gp4			Gp4	Unassigned
ASV807	0	0	0	0	0	59	146	0	0	61	5	0	4	0	10	285	Bacteria{superkingdom}(95);Bacteroidetes{phylum}(95);Sphingobacteriia{class}(95);Sphingobacteriales{order}(95);Chitinophagaceae{family}(95);{genus}(95);Unassigned{species}(0)	Bacteria	Bacteroidetes	Sphingobacteriia	Sphingobacteriales	Chitinophagaceae		Unassigned
ASV809	83	507	107	0	49	0	0	80	0	93	0	0	0	66	11	996	Bacteria{superkingdom}(82);Actinobacteria{phylum}(82);Actinobacteria{class}(82);Solirubrobacterales{order}(82);Conexibacteraceae{family}(82);Conexibacter{genus}(82);uncultured_bacterium{species}(82)	Bacteria	Actinobacteria	Actinobacteria	Solirubrobacterales	Conexibacteraceae	Conexibacter	uncultured_bacterium
ASV810	0	38	0	26	0	0	0	24	0	50	0	55	0	39	0	232	Bacteria{superkingdom}(97);Actinobacteria{phylum}(97);Actinobacteria{class}(97);Actinomycetales{order}(97);Mycobacteriaceae{family}(97);Mycobacterium{genus}(97);Unassigned{species}(0)	Bacteria	Actinobacteria	Actinobacteria	Actinomycetales	Mycobacteriaceae	Mycobacterium	Unassigned
ASV811	40	0	0	15	47	0	38	0	33	23	22	59	15	37	55	384	Bacteria{superkingdom}(100);candidate_division_WPS-1{phylum}(100);{class}(100);{order}(100);{family}(100);WPS-1_genera_incertae_sedis{genus}(100);Unassigned{species}(0)	Bacteria	candidate_division_WPS-1				WPS-1_genera_incertae_sedis	Unassigned
ASV812	88	25	87	100	123	0	11	0	14	18	0	16	0	30	9	521	Bacteria{superkingdom}(86);Actinobacteria{phylum}(86);Actinobacteria{class}(86);Acidimicrobiales{order}(86);{family}(86);{genus}(86);uncultured_Rhodococcus_sp.{species}(86)	Bacteria	Actinobacteria	Actinobacteria	Acidimicrobiales			uncultured_Rhodococcus_sp.
ASV813	0	0	0	120	97	0	0	15	0	25	28	29	0	36	15	365	Bacteria{superkingdom}(91);Proteobacteria{phylum}(91);Gammaproteobacteria{class}(91);Xanthomonadales{order}(91);Sinobacteraceae{family}(91);Steroidobacter{genus}(91);Unassigned{species}(0)	Bacteria	Proteobacteria	Gammaproteobacteria	Xanthomonadales	Sinobacteraceae	Steroidobacter	Unassigned
ASV814	45	59	0	81	0	46	0	0	0	0	0	0	111	0	0	342	Bacteria{superkingdom}(92);Actinobacteria{phylum}(92);Actinobacteria{class}(92);Actinomycetales{order}(92);Nocardioidaceae{family}(92);Marmoricola{genus}(92);Unassigned{species}(0)	Bacteria	Actinobacteria	Actinobacteria	Actinomycetales	Nocardioidaceae	Marmoricola	Unassigned
ASV816	39	0	71	72	65	174	83	135	258	110	108	31	0	30	127	1303	Bacteria{superkingdom}(97);Planctomycetes{phylum}(97);Planctomycetia{class}(97);Planctomycetales{order}(97);Planctomycetaceae{family}(97);Pirellula{genus}(97);uncultured_Firmicutes_bacterium{species}(97)	Bacteria	Planctomycetes	Planctomycetia	Planctomycetales	Planctomycetaceae	Pirellula	uncultured_Firmicutes_bacterium
ASV817	3	23	0	0	38	0	0	0	0	30	0	14	44	26	0	178	Bacteria{superkingdom}(100);Actinobacteria{phylum}(100);Actinobacteria{class}(100);Actinomycetales{order}(100);Nocardioidaceae{family}(100);Nocardioides{genus}(100);Unassigned{species}(0)	Bacteria	Actinobacteria	Actinobacteria	Actinomycetales	Nocardioidaceae	Nocardioides	Unassigned
ASV818	0	0	0	4	0	0	0	0	0	0	0	0	0	0	0	4	Bacteria{superkingdom}(100);Acidobacteria{phylum}(100);Acidobacteria_Gp7{class}(100);{order}(100);{family}(100);Gp7{genus}(100);Unassigned{species}(0)	Bacteria	Acidobacteria	Acidobacteria_Gp7			Gp7	Unassigned
ASV819	0	0	0	13	0	0	0	0	34	0	0	12	0	0	0	59	Bacteria{superkingdom}(100);Bacteroidetes{phylum}(100);Cytophagia{class}(100);Cytophagales{order}(100);{family}(100);Ohtaekwangia{genus}(100);Unassigned{species}(0)	Bacteria	Bacteroidetes	Cytophagia	Cytophagales		Ohtaekwangia	Unassigned
ASV820	0	29	0	0	0	17	0	41	12	22	0	33	28	19	17	218	Bacteria{superkingdom}(100);Proteobacteria{phylum}(100);Alphaproteobacteria{class}(100);Rhizobiales{order}(100);Unassigned{family}(0);Unassigned{genus}(0);Unassigned{species}(0)	Bacteria	Proteobacteria	Alphaproteobacteria	Rhizobiales	Unassigned	Unassigned	Unassigned
ASV821	42	20	108	251	145	0	0	0	0	0	9	12	21	21	0	629	Bacteria{superkingdom}(100);Bacteroidetes{phylum}(100);Sphingobacteriia{class}(100);Sphingobacteriales{order}(100);Chitinophagaceae{family}(100);Ferruginibacter{genus}(100);Unassigned{species}(0)	Bacteria	Bacteroidetes	Sphingobacteriia	Sphingobacteriales	Chitinophagaceae	Ferruginibacter	Unassigned
ASV822	10	0	0	0	0	0	0	0	9	0	0	523	0	14	0	556	Bacteria{superkingdom}(100);Actinobacteria{phylum}(100);Actinobacteria{class}(100);Actinomycetales{order}(100);Glycomycetaceae{family}(100);Glycomyces{genus}(100);Unassigned{species}(0)	Bacteria	Actinobacteria	Actinobacteria	Actinomycetales	Glycomycetaceae	Glycomyces	Unassigned
ASV823	0	0	0	0	0	0	0	0	0	41	0	282	117	65	0	505	Bacteria{superkingdom}(100);Chloroflexi{phylum}(100);Thermomicrobia{class}(100);Unassigned{order}(0);Unassigned{family}(0);Unassigned{genus}(0);Unassigned{species}(0)	Bacteria	Chloroflexi	Thermomicrobia	Unassigned	Unassigned	Unassigned	Unassigned
ASV824	0	0	0	0	0	0	0	0	0	0	0	41	74	286	0	401	Bacteria{superkingdom}(100);Bacteroidetes{phylum}(100);Sphingobacteriia{class}(100);Sphingobacteriales{order}(100);Chitinophagaceae{family}(100);Unassigned{genus}(0);Unassigned{species}(0)	Bacteria	Bacteroidetes	Sphingobacteriia	Sphingobacteriales	Chitinophagaceae	Unassigned	Unassigned
ASV825	69	0	0	0	61	70	0	37	45	0	0	0	151	42	197	672	Bacteria{superkingdom}(100);Actinobacteria{phylum}(100);Unassigned{class}(0);Unassigned{order}(0);Unassigned{family}(0);Unassigned{genus}(0);Unassigned{species}(0)	Bacteria	Actinobacteria	Unassigned	Unassigned	Unassigned	Unassigned	Unassigned
ASV827	50	0	64	26	22	0	0	0	214	0	136	129	248	0	24	913	Bacteria{superkingdom}(95);Actinobacteria{phylum}(95);Actinobacteria{class}(95);Solirubrobacterales{order}(95);{family}(95);{genus}(95);Unassigned{species}(0)	Bacteria	Actinobacteria	Actinobacteria	Solirubrobacterales			Unassigned
ASV828	200	0	376	16	161	0	6	0	0	0	128	0	0	11	0	898	Bacteria{superkingdom}(82);{phylum}(82);{class}(82);{order}(82);{family}(82);{genus}(82);uncultured_Gemmatimonadetes_bacterium{species}(82)	Bacteria						uncultured_Gemmatimonadetes_bacterium
ASV829	52	50	18	50	95	30	23	14	35	0	18	0	64	37	59	545	Bacteria{superkingdom}(92);Proteobacteria{phylum}(92);Alphaproteobacteria{class}(92);Rhizobiales{order}(92);Hyphomicrobiaceae{family}(92);Devosia{genus}(92);Unassigned{species}(0)	Bacteria	Proteobacteria	Alphaproteobacteria	Rhizobiales	Hyphomicrobiaceae	Devosia	Unassigned
ASV830	130	397	133	0	58	0	0	0	0	0	0	0	0	0	0	718	Bacteria{superkingdom}(91);Actinobacteria{phylum}(91);Actinobacteria{class}(91);Solirubrobacterales{order}(91);Conexibacteraceae{family}(91);Conexibacter{genus}(91);uncultured_Thermoleophilum_sp.{species}(91)	Bacteria	Actinobacteria	Actinobacteria	Solirubrobacterales	Conexibacteraceae	Conexibacter	uncultured_Thermoleophilum_sp.
ASV831	41	30	35	49	99	0	0	21	124	0	84	0	0	13	52	548	Bacteria{superkingdom}(100);Bacteroidetes{phylum}(100);Cytophagia{class}(100);Cytophagales{order}(100);{family}(100);Ohtaekwangia{genus}(100);Unassigned{species}(0)	Bacteria	Bacteroidetes	Cytophagia	Cytophagales		Ohtaekwangia	Unassigned
ASV832	0	0	0	0	0	0	0	0	0	0	0	43	16	22	0	81	Bacteria{superkingdom}(98);Acidobacteria{phylum}(98);Acidobacteria_Gp3{class}(98);{order}(98);{family}(98);Gp3{genus}(98);Unassigned{species}(0)	Bacteria	Acidobacteria	Acidobacteria_Gp3			Gp3	Unassigned
ASV833	0	249	0	24	0	27	42	34	0	240	0	149	9	35	119	928	Bacteria{superkingdom}(85);Chloroflexi{phylum}(85);{class}(85);{order}(85);{family}(85);{genus}(85);Unassigned{species}(0)	Bacteria	Chloroflexi					Unassigned
ASV834	89	0	0	0	0	0	0	0	0	0	0	0	0	0	0	89	Bacteria{superkingdom}(84);Chloroflexi{phylum}(84);Chloroflexia{class}(84);Kallotenuales{order}(84);Kallotenuaceae{family}(84);Kallotenue{genus}(84);uncultured_bacterium{species}(84)	Bacteria	Chloroflexi	Chloroflexia	Kallotenuales	Kallotenuaceae	Kallotenue	uncultured_bacterium
ASV835	14	31	16	37	28	46	56	45	31	45	52	38	84	0	18	541	Bacteria{superkingdom}(90);Chloroflexi{phylum}(90);{class}(90);{order}(90);{family}(90);{genus}(90);Unassigned{species}(0)	Bacteria	Chloroflexi					Unassigned
ASV838	0	0	0	0	25	0	0	0	0	0	0	0	0	0	0	25	Bacteria{superkingdom}(100);Bacteroidetes{phylum}(100);Sphingobacteriia{class}(100);Sphingobacteriales{order}(100);Chitinophagaceae{family}(100);Chitinophaga{genus}(100);Unassigned{species}(0)	Bacteria	Bacteroidetes	Sphingobacteriia	Sphingobacteriales	Chitinophagaceae	Chitinophaga	Unassigned
ASV839	0	0	0	0	0	0	0	0	0	0	0	11	0	8	0	19	Bacteria{superkingdom}(98);Chloroflexi{phylum}(98);Thermomicrobia{class}(98);{order}(98);{family}(98);{genus}(98);uncultured_bacterium{species}(98)	Bacteria	Chloroflexi	Thermomicrobia				uncultured_bacterium
ASV841	0	0	0	0	0	0	0	37	0	0	0	0	0	0	0	37	Bacteria{superkingdom}(97);Actinobacteria{phylum}(97);Actinobacteria{class}(97);Solirubrobacterales{order}(97);Conexibacteraceae{family}(97);Conexibacter{genus}(97);uncultured_Thermoleophilum_sp.{species}(97)	Bacteria	Actinobacteria	Actinobacteria	Solirubrobacterales	Conexibacteraceae	Conexibacter	uncultured_Thermoleophilum_sp.
ASV842	44	199	34	180	24	0	0	29	0	0	0	0	0	0	0	510	Bacteria{superkingdom}(80);Acidobacteria{phylum}(80);Acidobacteria_Gp10{class}(80);{order}(80);{family}(80);Gp10{genus}(80);uncultured_Pelobacter_sp.{species}(80)	Bacteria	Acidobacteria	Acidobacteria_Gp10			Gp10	uncultured_Pelobacter_sp.
ASV843	0	0	0	32	0	0	0	0	12	91	0	0	0	23	0	158	Bacteria{superkingdom}(88);Proteobacteria{phylum}(88);Betaproteobacteria{class}(88);Burkholderiales{order}(88);Oxalobacteraceae{family}(88);Massilia{genus}(88);Massilia_dura{species}(88)	Bacteria	Proteobacteria	Betaproteobacteria	Burkholderiales	Oxalobacteraceae	Massilia	Massilia_dura
ASV847	0	0	0	0	0	0	0	0	0	9	0	0	0	0	0	9	Bacteria{superkingdom}(83);Bacteroidetes{phylum}(83);Cytophagia{class}(83);Cytophagales{order}(83);Cytophagaceae{family}(83);Rhodocytophaga{genus}(83);uncultured_Flexibacteraceae_bacterium{species}(83)	Bacteria	Bacteroidetes	Cytophagia	Cytophagales	Cytophagaceae	Rhodocytophaga	uncultured_Flexibacteraceae_bacterium
ASV849	0	15	37	21	49	0	93	34	29	0	0	0	0	0	0	278	Bacteria{superkingdom}(100);Acidobacteria{phylum}(100);Acidobacteria_Gp6{class}(100);{order}(100);{family}(100);Gp6{genus}(100);Unassigned{species}(0)	Bacteria	Acidobacteria	Acidobacteria_Gp6			Gp6	Unassigned
ASV850	0	0	0	0	0	0	0	0	0	0	0	28	0	0	0	28	Bacteria{superkingdom}(86);Chloroflexi{phylum}(86);Chloroflexia{class}(86);Kallotenuales{order}(86);Kallotenuaceae{family}(86);Kallotenue{genus}(86);uncultured_endolithic_bacterium{species}(86)	Bacteria	Chloroflexi	Chloroflexia	Kallotenuales	Kallotenuaceae	Kallotenue	uncultured_endolithic_bacterium
ASV851	44	53	41	16	7	5	22	40	23	85	0	0	0	31	8	375	Bacteria{superkingdom}(100);Planctomycetes{phylum}(100);Planctomycetia{class}(100);Planctomycetales{order}(100);Planctomycetaceae{family}(100);{genus}(100);uncultured_Blastopirellula_sp.{species}(100)	Bacteria	Planctomycetes	Planctomycetia	Planctomycetales	Planctomycetaceae		uncultured_Blastopirellula_sp.
ASV852	0	15	0	0	0	0	0	0	0	0	0	31	7	26	0	79	Bacteria{superkingdom}(100);Proteobacteria{phylum}(100);Alphaproteobacteria{class}(100);Unassigned{order}(0);Unassigned{family}(0);Unassigned{genus}(0);Unassigned{species}(0)	Bacteria	Proteobacteria	Alphaproteobacteria	Unassigned	Unassigned	Unassigned	Unassigned
ASV853	28	0	0	0	34	109	72	57	38	0	0	0	0	0	0	338	Bacteria{superkingdom}(92);Acidobacteria{phylum}(92);Acidobacteria_Gp3{class}(92);{order}(92);{family}(92);{genus}(92);uncultured_Candidatus_Solibacter_sp.{species}(92)	Bacteria	Acidobacteria	Acidobacteria_Gp3				uncultured_Candidatus_Solibacter_sp.
ASV854	0	0	0	0	0	43	0	15	0	0	71	17	11	35	93	285	Bacteria{superkingdom}(100);Bacteroidetes{phylum}(100);Sphingobacteriia{class}(100);Sphingobacteriales{order}(100);Chitinophagaceae{family}(100);Chitinophaga{genus}(100);Unassigned{species}(0)	Bacteria	Bacteroidetes	Sphingobacteriia	Sphingobacteriales	Chitinophagaceae	Chitinophaga	Unassigned
ASV855	533	21	1249	0	176	28	0	162	56	0	19	0	0	0	0	2244	Bacteria{superkingdom}(99);Firmicutes{phylum}(99);Bacilli{class}(99);Bacillales{order}(99);Bacillaceae_1{family}(99);Bacillus{genus}(99);Unassigned{species}(0)	Bacteria	Firmicutes	Bacilli	Bacillales	Bacillaceae_1	Bacillus	Unassigned
ASV857	0	0	45	0	0	0	45	51	0	0	0	7	0	0	0	148	Bacteria{superkingdom}(99);Chloroflexi{phylum}(99);Chloroflexia{class}(99);{order}(99);{family}(99);{genus}(99);Unassigned{species}(0)	Bacteria	Chloroflexi	Chloroflexia				Unassigned
ASV858	19	42	0	39	23	0	0	31	0	19	0	8	0	0	0	181	Bacteria{superkingdom}(100);Proteobacteria{phylum}(100);Deltaproteobacteria{class}(100);Myxococcales{order}(100);Unassigned{family}(0);Unassigned{genus}(0);Unassigned{species}(0)	Bacteria	Proteobacteria	Deltaproteobacteria	Myxococcales	Unassigned	Unassigned	Unassigned
ASV860	0	0	0	0	0	49	50	64	15	19	10	24	39	39	8	317	Bacteria{superkingdom}(100);Actinobacteria{phylum}(100);Actinobacteria{class}(100);Actinomycetales{order}(100);Microbacteriaceae{family}(100);Unassigned{genus}(0);Unassigned{species}(0)	Bacteria	Actinobacteria	Actinobacteria	Actinomycetales	Microbacteriaceae	Unassigned	Unassigned
ASV861	28	176	0	806	41	0	0	16	0	0	0	30	0	0	0	1097	Bacteria{superkingdom}(89);Actinobacteria{phylum}(89);Actinobacteria{class}(89);Actinomycetales{order}(89);Nocardioidaceae{family}(89);Nocardioides{genus}(89);Nocardioides_albus{species}(89)	Bacteria	Actinobacteria	Actinobacteria	Actinomycetales	Nocardioidaceae	Nocardioides	Nocardioides_albus
ASV862	23	0	42	22	20	18	13	65	46	26	0	0	43	0	0	318	Bacteria{superkingdom}(100);Actinobacteria{phylum}(100);Actinobacteria{class}(100);Actinomycetales{order}(100);Nocardioidaceae{family}(100);Nocardioides{genus}(100);Unassigned{species}(0)	Bacteria	Actinobacteria	Actinobacteria	Actinomycetales	Nocardioidaceae	Nocardioides	Unassigned
ASV863	32	0	54	104	60	59	0	0	16	12	75	0	0	0	108	520	Bacteria{superkingdom}(100);Armatimonadetes{phylum}(100);Chthonomonadetes{class}(100);Chthonomonadales{order}(100);Chthonomonadaceae{family}(100);Chthonomonas/Armatimonadetes_gp3{genus}(100);Unassigned{species}(0)	Bacteria	Armatimonadetes	Chthonomonadetes	Chthonomonadales	Chthonomonadaceae	Chthonomonas/Armatimonadetes_gp3	Unassigned
ASV864	0	0	0	0	0	0	0	47	0	49	0	0	0	0	0	96	Bacteria{superkingdom}(91);Acidobacteria{phylum}(91);Acidobacteria_Gp16{class}(91);{order}(91);{family}(91);Gp16{genus}(91);Unassigned{species}(0)	Bacteria	Acidobacteria	Acidobacteria_Gp16			Gp16	Unassigned
ASV865	40	78	36	102	194	100	88	83	43	59	0	58	77	58	45	1061	Bacteria{superkingdom}(100);Bacteroidetes{phylum}(100);Sphingobacteriia{class}(100);Sphingobacteriales{order}(100);Chitinophagaceae{family}(100);Flavisolibacter{genus}(100);Unassigned{species}(0)	Bacteria	Bacteroidetes	Sphingobacteriia	Sphingobacteriales	Chitinophagaceae	Flavisolibacter	Unassigned
ASV867	0	0	108	0	29	0	0	0	101	0	0	0	0	0	35	273	Bacteria{superkingdom}(81);Firmicutes{phylum}(81);Bacilli{class}(81);Bacillales{order}(81);Bacillaceae_1{family}(81);Bacillus{genus}(81);Bacillus_funiculus{species}(81)	Bacteria	Firmicutes	Bacilli	Bacillales	Bacillaceae_1	Bacillus	Bacillus_funiculus
ASV869	40	57	0	12	133	0	24	55	0	31	38	53	0	34	44	521	Bacteria{superkingdom}(93);Planctomycetes{phylum}(93);Planctomycetia{class}(93);Planctomycetales{order}(93);Planctomycetaceae{family}(93);{genus}(93);Planctomyces_sp.{species}(93)	Bacteria	Planctomycetes	Planctomycetia	Planctomycetales	Planctomycetaceae		Planctomyces_sp.
ASV871	176	0	697	28	56	0	0	0	13	0	26	0	0	0	0	996	Bacteria{superkingdom}(94);Bacteroidetes{phylum}(94);Sphingobacteriia{class}(94);Sphingobacteriales{order}(94);Chitinophagaceae{family}(94);Taibaiella{genus}(94);uncultured_bacterium{species}(94)	Bacteria	Bacteroidetes	Sphingobacteriia	Sphingobacteriales	Chitinophagaceae	Taibaiella	uncultured_bacterium
ASV872	39	0	0	98	41	0	0	0	0	0	0	0	0	0	0	178	Bacteria{superkingdom}(100);Bacteroidetes{phylum}(100);Sphingobacteriia{class}(100);Sphingobacteriales{order}(100);Chitinophagaceae{family}(100);Niastella{genus}(100);Unassigned{species}(0)	Bacteria	Bacteroidetes	Sphingobacteriia	Sphingobacteriales	Chitinophagaceae	Niastella	Unassigned
ASV873	0	0	0	0	0	0	0	0	19	0	0	0	0	0	0	19	Bacteria{superkingdom}(98);Actinobacteria{phylum}(98);Actinobacteria{class}(98);Acidimicrobiales{order}(98);Acidimicrobineae_incertae_sedis{family}(98);Aciditerrimonas{genus}(98);Unassigned{species}(0)	Bacteria	Actinobacteria	Actinobacteria	Acidimicrobiales	Acidimicrobineae_incertae_sedis	Aciditerrimonas	Unassigned
ASV874	0	20	0	0	0	0	0	0	0	0	0	0	0	0	0	20	Bacteria{superkingdom}(92);Chloroflexi{phylum}(92);Chloroflexia{class}(92);Kallotenuales{order}(92);Kallotenuaceae{family}(92);Kallotenue{genus}(92);uncultured_bacterium{species}(92)	Bacteria	Chloroflexi	Chloroflexia	Kallotenuales	Kallotenuaceae	Kallotenue	uncultured_bacterium
ASV875	75	332	154	0	0	112	73	0	0	167	72	0	0	0	0	985	Bacteria{superkingdom}(93);Actinobacteria{phylum}(93);Actinobacteria{class}(93);Acidimicrobiales{order}(93);Acidimicrobineae_incertae_sedis{family}(93);Aciditerrimonas{genus}(93);uncultured_Acidimicrobiales_bacterium{species}(93)	Bacteria	Actinobacteria	Actinobacteria	Acidimicrobiales	Acidimicrobineae_incertae_sedis	Aciditerrimonas	uncultured_Acidimicrobiales_bacterium
ASV876	0	35	0	5	0	0	13	16	11	14	0	0	14	0	0	108	Bacteria{superkingdom}(100);{phylum}(100);{class}(100);{order}(100);{family}(100);{genus}(100);uncultured_candidate_division_WYO_bacterium{species}(100)	Bacteria						uncultured_candidate_division_WYO_bacterium
ASV877	0	114	0	40	34	41	131	0	0	83	53	45	120	99	75	835	Bacteria{superkingdom}(100);Proteobacteria{phylum}(100);Betaproteobacteria{class}(100);Burkholderiales{order}(100);Comamonadaceae{family}(100);Unassigned{genus}(0);Unassigned{species}(0)	Bacteria	Proteobacteria	Betaproteobacteria	Burkholderiales	Comamonadaceae	Unassigned	Unassigned
ASV878	0	0	0	0	0	0	0	0	0	0	0	68	0	0	0	68	Bacteria{superkingdom}(100);Proteobacteria{phylum}(100);Alphaproteobacteria{class}(100);Sphingomonadales{order}(100);Sphingomonadaceae{family}(100);Sphingomonas{genus}(100);Unassigned{species}(0)	Bacteria	Proteobacteria	Alphaproteobacteria	Sphingomonadales	Sphingomonadaceae	Sphingomonas	Unassigned
ASV879	163	584	284	0	0	33	0	0	73	0	0	0	0	141	97	1375	Bacteria{superkingdom}(100);Chloroflexi{phylum}(100);{class}(100);{order}(100);{family}(100);{genus}(100);uncultured_Anaerolineae_bacterium{species}(100)	Bacteria	Chloroflexi					uncultured_Anaerolineae_bacterium
ASV880	45	0	10	53	0	119	28	23	69	69	0	0	0	0	0	416	Bacteria{superkingdom}(100);Unassigned{phylum}(0);Unassigned{class}(0);Unassigned{order}(0);Unassigned{family}(0);Unassigned{genus}(0);Unassigned{species}(0)	Bacteria	Unassigned	Unassigned	Unassigned	Unassigned	Unassigned	Unassigned
ASV881	0	0	0	0	0	0	0	0	0	0	0	0	0	264	0	264	Bacteria{superkingdom}(99);Proteobacteria{phylum}(99);Gammaproteobacteria{class}(99);Pseudomonadales{order}(99);Pseudomonadaceae{family}(99);Pseudomonas{genus}(99);Unassigned{species}(0)	Bacteria	Proteobacteria	Gammaproteobacteria	Pseudomonadales	Pseudomonadaceae	Pseudomonas	Unassigned
ASV882	74	154	71	0	44	0	0	0	0	0	0	0	0	0	0	343	Bacteria{superkingdom}(100);Actinobacteria{phylum}(100);Actinobacteria{class}(100);Actinomycetales{order}(100);Pseudonocardiaceae{family}(100);Pseudonocardia{genus}(100);Unassigned{species}(0)	Bacteria	Actinobacteria	Actinobacteria	Actinomycetales	Pseudonocardiaceae	Pseudonocardia	Unassigned
ASV883	35	161	0	80	26	0	0	0	0	0	0	0	0	0	0	302	Bacteria{superkingdom}(82);Actinobacteria{phylum}(82);Actinobacteria{class}(82);Actinomycetales{order}(82);Unassigned{family}(0);Unassigned{genus}(0);Unassigned{species}(0)	Bacteria	Actinobacteria	Actinobacteria	Actinomycetales	Unassigned	Unassigned	Unassigned
ASV884	25	47	44	62	107	62	18	85	14	0	0	0	0	0	29	493	Bacteria{superkingdom}(100);Proteobacteria{phylum}(100);Alphaproteobacteria{class}(100);Rhodospirillales{order}(100);{family}(100);Reyranella{genus}(100);Unassigned{species}(0)	Bacteria	Proteobacteria	Alphaproteobacteria	Rhodospirillales		Reyranella	Unassigned
ASV885	0	0	0	0	0	0	0	0	27	425	0	435	0	0	13	900	Bacteria{superkingdom}(100);Actinobacteria{phylum}(100);Actinobacteria{class}(100);Actinomycetales{order}(100);Unassigned{family}(0);Unassigned{genus}(0);Unassigned{species}(0)	Bacteria	Actinobacteria	Actinobacteria	Actinomycetales	Unassigned	Unassigned	Unassigned
ASV886	117	0	90	0	57	0	0	0	63	46	85	78	0	95	70	701	Bacteria{superkingdom}(85);Actinobacteria{phylum}(85);Actinobacteria{class}(85);Solirubrobacterales{order}(85);Solirubrobacteraceae{family}(85);Solirubrobacter{genus}(85);uncultured_bacterium{species}(85)	Bacteria	Actinobacteria	Actinobacteria	Solirubrobacterales	Solirubrobacteraceae	Solirubrobacter	uncultured_bacterium
ASV887	0	0	0	0	0	0	0	0	0	13	0	0	0	23	0	36	Bacteria{superkingdom}(85);Actinobacteria{phylum}(85);Actinobacteria{class}(85);Rubrobacterales{order}(85);Rubrobacteraceae{family}(85);Rubrobacter{genus}(85);uncultured_bacterium{species}(85)	Bacteria	Actinobacteria	Actinobacteria	Rubrobacterales	Rubrobacteraceae	Rubrobacter	uncultured_bacterium
ASV888	17	19	18	45	59	0	60	21	37	48	31	0	0	0	27	382	Bacteria{superkingdom}(95);Proteobacteria{phylum}(95);Alphaproteobacteria{class}(95);Rhizobiales{order}(95);{family}(95);{genus}(95);uncultured_Methylocystis_sp.{species}(95)	Bacteria	Proteobacteria	Alphaproteobacteria	Rhizobiales			uncultured_Methylocystis_sp.
ASV889	79	0	0	20	0	0	0	0	0	0	0	0	0	0	0	99	Bacteria{superkingdom}(86);Chloroflexi{phylum}(86);Chloroflexia{class}(86);{order}(86);{family}(86);{genus}(86);uncultured_Chloroflexi_bacterium{species}(86)	Bacteria	Chloroflexi	Chloroflexia				uncultured_Chloroflexi_bacterium
ASV892	0	0	0	83	103	0	0	0	55	37	188	32	0	0	0	498	Bacteria{superkingdom}(85);Proteobacteria{phylum}(85);Betaproteobacteria{class}(85);{order}(85);{family}(85);{genus}(85);uncultured_Alcaligenaceae_bacterium{species}(85)	Bacteria	Proteobacteria	Betaproteobacteria				uncultured_Alcaligenaceae_bacterium
ASV893	0	0	0	23	0	0	0	0	0	0	0	0	0	0	0	23	Bacteria{superkingdom}(100);Bacteroidetes{phylum}(100);Sphingobacteriia{class}(100);Sphingobacteriales{order}(100);Chitinophagaceae{family}(100);{genus}(100);uncultured_Cytophaga_sp.{species}(100)	Bacteria	Bacteroidetes	Sphingobacteriia	Sphingobacteriales	Chitinophagaceae		uncultured_Cytophaga_sp.
ASV894	27	39	45	52	9	56	119	101	21	41	37	75	40	84	68	814	Bacteria{superkingdom}(86);Chloroflexi{phylum}(86);Thermomicrobia{class}(86);Sphaerobacterales{order}(86);Sphaerobacteraceae{family}(86);{genus}(86);Unassigned{species}(0)	Bacteria	Chloroflexi	Thermomicrobia	Sphaerobacterales	Sphaerobacteraceae		Unassigned
ASV895	0	0	21	51	0	0	0	0	0	16	0	31	0	0	0	119	Bacteria{superkingdom}(100);Bacteroidetes{phylum}(100);Sphingobacteriia{class}(100);Sphingobacteriales{order}(100);Chitinophagaceae{family}(100);Niastella{genus}(100);Unassigned{species}(0)	Bacteria	Bacteroidetes	Sphingobacteriia	Sphingobacteriales	Chitinophagaceae	Niastella	Unassigned
ASV897	157	0	52	77	34	0	0	15	166	36	0	0	11	0	0	548	Bacteria{superkingdom}(100);Firmicutes{phylum}(100);Bacilli{class}(100);Bacillales{order}(100);Unassigned{family}(0);Unassigned{genus}(0);Unassigned{species}(0)	Bacteria	Firmicutes	Bacilli	Bacillales	Unassigned	Unassigned	Unassigned
ASV898	68	274	62	0	0	0	0	0	0	68	0	118	218	0	0	808	Bacteria{superkingdom}(88);Actinobacteria{phylum}(88);Actinobacteria{class}(88);Actinomycetales{order}(88);Nocardioidaceae{family}(88);Marmoricola{genus}(88);Unassigned{species}(0)	Bacteria	Actinobacteria	Actinobacteria	Actinomycetales	Nocardioidaceae	Marmoricola	Unassigned
ASV899	0	0	0	0	0	0	0	0	0	0	0	17	0	0	0	17	Bacteria{superkingdom}(100);Bacteroidetes{phylum}(100);Cytophagia{class}(100);Cytophagales{order}(100);Cytophagaceae{family}(100);Adhaeribacter{genus}(100);Unassigned{species}(0)	Bacteria	Bacteroidetes	Cytophagia	Cytophagales	Cytophagaceae	Adhaeribacter	Unassigned
ASV900	0	0	34	39	23	0	0	19	0	0	0	0	0	0	0	115	Bacteria{superkingdom}(100);Unassigned{phylum}(0);Unassigned{class}(0);Unassigned{order}(0);Unassigned{family}(0);Unassigned{genus}(0);Unassigned{species}(0)	Bacteria	Unassigned	Unassigned	Unassigned	Unassigned	Unassigned	Unassigned
ASV903	0	0	0	11	68	0	0	0	0	0	0	0	0	0	0	79	Bacteria{superkingdom}(97);Planctomycetes{phylum}(97);Planctomycetia{class}(97);Planctomycetales{order}(97);Planctomycetaceae{family}(97);{genus}(97);Planctomyces_sp.{species}(97)	Bacteria	Planctomycetes	Planctomycetia	Planctomycetales	Planctomycetaceae		Planctomyces_sp.
ASV904	0	0	0	0	35	0	0	0	0	47	0	37	45	55	0	219	Bacteria{superkingdom}(100);Actinobacteria{phylum}(100);Actinobacteria{class}(100);Actinomycetales{order}(100);Nocardioidaceae{family}(100);Nocardioides{genus}(100);Unassigned{species}(0)	Bacteria	Actinobacteria	Actinobacteria	Actinomycetales	Nocardioidaceae	Nocardioides	Unassigned
ASV905	30	0	0	0	0	63	55	154	64	40	31	63	0	0	64	564	Bacteria{superkingdom}(97);Chloroflexi{phylum}(97);Chloroflexia{class}(97);{order}(97);{family}(97);{genus}(97);uncultured_bacterium{species}(97)	Bacteria	Chloroflexi	Chloroflexia				uncultured_bacterium
ASV907	77	101	140	52	82	52	22	13	66	40	114	67	0	0	33	859	Bacteria{superkingdom}(86);Chloroflexi{phylum}(86);Anaerolineae{class}(86);Anaerolineales{order}(86);Anaerolineaceae{family}(86);Unassigned{genus}(0);Unassigned{species}(0)	Bacteria	Chloroflexi	Anaerolineae	Anaerolineales	Anaerolineaceae	Unassigned	Unassigned
ASV908	0	36	0	0	0	0	0	0	0	0	0	37	0	22	11	106	Bacteria{superkingdom}(96);Actinobacteria{phylum}(96);Actinobacteria{class}(96);Solirubrobacterales{order}(96);Conexibacteraceae{family}(96);Conexibacter{genus}(96);uncultured_Rubrobacteraceae_bacterium{species}(96)	Bacteria	Actinobacteria	Actinobacteria	Solirubrobacterales	Conexibacteraceae	Conexibacter	uncultured_Rubrobacteraceae_bacterium
ASV909	0	0	0	0	0	84	0	0	0	0	0	0	0	0	0	84	Bacteria{superkingdom}(100);Proteobacteria{phylum}(100);Betaproteobacteria{class}(100);{order}(100);{family}(100);{genus}(100);Unassigned{species}(0)	Bacteria	Proteobacteria	Betaproteobacteria				Unassigned
ASV910	59	431	24	0	16	20	32	148	0	0	0	0	0	0	77	807	Bacteria{superkingdom}(100);Chloroflexi{phylum}(100);{class}(100);{order}(100);{family}(100);{genus}(100);uncultured_Firmicutes_bacterium{species}(100)	Bacteria	Chloroflexi					uncultured_Firmicutes_bacterium
ASV911	0	0	0	0	18	0	0	0	0	0	0	0	0	0	6	24	Bacteria{superkingdom}(99);Proteobacteria{phylum}(99);Alphaproteobacteria{class}(99);Rhizobiales{order}(99);Rhizobiaceae{family}(99);Rhizobium{genus}(99);Unassigned{species}(0)	Bacteria	Proteobacteria	Alphaproteobacteria	Rhizobiales	Rhizobiaceae	Rhizobium	Unassigned
ASV912	0	56	0	16	0	0	38	64	0	0	14	0	53	0	0	241	Bacteria{superkingdom}(99);Proteobacteria{phylum}(99);Alphaproteobacteria{class}(99);Rhodospirillales{order}(99);{family}(99);{genus}(99);Unassigned{species}(0)	Bacteria	Proteobacteria	Alphaproteobacteria	Rhodospirillales			Unassigned
ASV913	69	0	44	16	34	0	12	33	0	31	24	12	0	98	0	373	Bacteria{superkingdom}(100);Actinobacteria{phylum}(100);Unassigned{class}(0);Unassigned{order}(0);Unassigned{family}(0);Unassigned{genus}(0);Unassigned{species}(0)	Bacteria	Actinobacteria	Unassigned	Unassigned	Unassigned	Unassigned	Unassigned
ASV914	0	0	27	52	0	0	0	0	48	0	0	0	0	0	0	127	Bacteria{superkingdom}(80);Proteobacteria{phylum}(80);Gammaproteobacteria{class}(80);Xanthomonadales{order}(80);Sinobacteraceae{family}(80);Povalibacter{genus}(80);uncultured_Burkholderiales_bacterium{species}(80)	Bacteria	Proteobacteria	Gammaproteobacteria	Xanthomonadales	Sinobacteraceae	Povalibacter	uncultured_Burkholderiales_bacterium
ASV915	0	1217	0	59	14	0	24	39	0	69	0	253	21	81	229	2006	Bacteria{superkingdom}(100);Actinobacteria{phylum}(100);Unassigned{class}(0);Unassigned{order}(0);Unassigned{family}(0);Unassigned{genus}(0);Unassigned{species}(0)	Bacteria	Actinobacteria	Unassigned	Unassigned	Unassigned	Unassigned	Unassigned
ASV916	0	0	40	34	71	49	46	88	120	119	165	57	459	0	59	1307	Bacteria{superkingdom}(100);Bacteroidetes{phylum}(100);Cytophagia{class}(100);Cytophagales{order}(100);{family}(100);Ohtaekwangia{genus}(100);Unassigned{species}(0)	Bacteria	Bacteroidetes	Cytophagia	Cytophagales		Ohtaekwangia	Unassigned
ASV917	0	0	0	0	0	53	59	0	0	0	0	0	0	50	44	206	Bacteria{superkingdom}(100);Proteobacteria{phylum}(100);Unassigned{class}(0);Unassigned{order}(0);Unassigned{family}(0);Unassigned{genus}(0);Unassigned{species}(0)	Bacteria	Proteobacteria	Unassigned	Unassigned	Unassigned	Unassigned	Unassigned
ASV918	0	228	58	0	0	0	0	0	23	0	0	0	0	0	0	309	Bacteria{superkingdom}(84);Actinobacteria{phylum}(84);Actinobacteria{class}(84);Solirubrobacterales{order}(84);{family}(84);{genus}(84);Unassigned{species}(0)	Bacteria	Actinobacteria	Actinobacteria	Solirubrobacterales			Unassigned
ASV919	0	0	0	0	0	0	0	85	0	0	0	0	0	0	0	85	Bacteria{superkingdom}(100);Proteobacteria{phylum}(100);Alphaproteobacteria{class}(100);Rhizobiales{order}(100);Methylobacteriaceae{family}(100);Microvirga{genus}(100);Unassigned{species}(0)	Bacteria	Proteobacteria	Alphaproteobacteria	Rhizobiales	Methylobacteriaceae	Microvirga	Unassigned
ASV920	79	0	105	0	43	265	45	0	48	36	0	0	0	0	45	666	Bacteria{superkingdom}(94);Chloroflexi{phylum}(94);{class}(94);{order}(94);{family}(94);{genus}(94);Unassigned{species}(0)	Bacteria	Chloroflexi					Unassigned
ASV922	21	0	19	37	98	43	0	41	0	0	80	0	0	0	0	339	Bacteria{superkingdom}(100);Proteobacteria{phylum}(100);Gammaproteobacteria{class}(100);{order}(100);{family}(100);{genus}(100);Unassigned{species}(0)	Bacteria	Proteobacteria	Gammaproteobacteria				Unassigned
ASV923	20	34	22	0	27	13	12	0	23	0	66	0	0	40	0	257	Bacteria{superkingdom}(88);Proteobacteria{phylum}(88);Alphaproteobacteria{class}(88);Rhizobiales{order}(88);Hyphomicrobiaceae{family}(88);Pedomicrobium{genus}(88);uncultured_alpha_proteobacterium{species}(88)	Bacteria	Proteobacteria	Alphaproteobacteria	Rhizobiales	Hyphomicrobiaceae	Pedomicrobium	uncultured_alpha_proteobacterium
ASV924	0	0	0	0	0	0	0	0	0	48	0	0	0	0	0	48	Bacteria{superkingdom}(100);Actinobacteria{phylum}(100);Actinobacteria{class}(100);Actinomycetales{order}(100);Nocardioidaceae{family}(100);Nocardioides{genus}(100);Unassigned{species}(0)	Bacteria	Actinobacteria	Actinobacteria	Actinomycetales	Nocardioidaceae	Nocardioides	Unassigned
ASV925	8	10	15	0	93	0	0	6	0	17	0	7	37	45	0	238	Bacteria{superkingdom}(100);Chloroflexi{phylum}(100);{class}(100);{order}(100);{family}(100);{genus}(100);uncultured_Anaerolineae_bacterium{species}(100)	Bacteria	Chloroflexi					uncultured_Anaerolineae_bacterium
ASV926	0	0	9	15	0	0	0	0	23	0	0	0	0	0	0	47	Bacteria{superkingdom}(100);Unassigned{phylum}(0);Unassigned{class}(0);Unassigned{order}(0);Unassigned{family}(0);Unassigned{genus}(0);Unassigned{species}(0)	Bacteria	Unassigned	Unassigned	Unassigned	Unassigned	Unassigned	Unassigned
ASV927	0	0	0	0	0	0	0	0	0	0	0	21	0	0	0	21	Bacteria{superkingdom}(100);Bacteroidetes{phylum}(100);Cytophagia{class}(100);Cytophagales{order}(100);Cytophagaceae{family}(100);Adhaeribacter{genus}(100);Unassigned{species}(0)	Bacteria	Bacteroidetes	Cytophagia	Cytophagales	Cytophagaceae	Adhaeribacter	Unassigned
ASV928	0	0	65	91	120	0	0	0	0	0	35	0	0	0	0	311	Bacteria{superkingdom}(97);Proteobacteria{phylum}(97);Alphaproteobacteria{class}(97);Rhizobiales{order}(97);Hyphomicrobiaceae{family}(97);Devosia{genus}(97);Unassigned{species}(0)	Bacteria	Proteobacteria	Alphaproteobacteria	Rhizobiales	Hyphomicrobiaceae	Devosia	Unassigned
ASV929	75	0	52	38	46	14	19	44	27	43	0	48	25	67	49	547	Bacteria{superkingdom}(100);Proteobacteria{phylum}(100);Alphaproteobacteria{class}(100);Caulobacterales{order}(100);Caulobacteraceae{family}(100);Unassigned{genus}(0);Unassigned{species}(0)	Bacteria	Proteobacteria	Alphaproteobacteria	Caulobacterales	Caulobacteraceae	Unassigned	Unassigned
ASV930	38	18	68	86	0	54	25	38	77	90	87	235	73	6	56	951	Bacteria{superkingdom}(100);Actinobacteria{phylum}(100);Actinobacteria{class}(100);Gaiellales{order}(100);Gaiellaceae{family}(100);Gaiella{genus}(100);uncultured_Actinomycetales_bacterium{species}(100)	Bacteria	Actinobacteria	Actinobacteria	Gaiellales	Gaiellaceae	Gaiella	uncultured_Actinomycetales_bacterium
ASV931	53	0	0	0	80	0	0	0	0	0	0	0	0	0	0	133	Bacteria{superkingdom}(82);Proteobacteria{phylum}(82);Deltaproteobacteria{class}(82);Myxococcales{order}(82);Kofleriaceae{family}(82);Kofleria{genus}(82);Kofleria_flava{species}(82)	Bacteria	Proteobacteria	Deltaproteobacteria	Myxococcales	Kofleriaceae	Kofleria	Kofleria_flava
ASV932	67	18	24	17	28	0	17	14	0	28	0	38	18	56	0	325	Bacteria{superkingdom}(97);Actinobacteria{phylum}(97);Actinobacteria{class}(97);Solirubrobacterales{order}(97);{family}(97);{genus}(97);uncultured_bacterium{species}(97)	Bacteria	Actinobacteria	Actinobacteria	Solirubrobacterales			uncultured_bacterium
ASV933	32	21	13	19	0	19	30	27	0	31	0	79	49	28	40	388	Bacteria{superkingdom}(99);Actinobacteria{phylum}(99);Actinobacteria{class}(99);Unassigned{order}(0);Unassigned{family}(0);Unassigned{genus}(0);Unassigned{species}(0)	Bacteria	Actinobacteria	Actinobacteria	Unassigned	Unassigned	Unassigned	Unassigned
ASV934	10	0	32	38	8	0	0	30	0	0	76	37	0	93	24	348	Bacteria{superkingdom}(91);Proteobacteria{phylum}(91);Deltaproteobacteria{class}(91);Myxococcales{order}(91);Polyangiaceae{family}(91);{genus}(91);Unassigned{species}(0)	Bacteria	Proteobacteria	Deltaproteobacteria	Myxococcales	Polyangiaceae		Unassigned
ASV935	0	0	0	0	0	0	0	72	33	0	116	0	0	0	0	221	Bacteria{superkingdom}(94);Firmicutes{phylum}(94);Bacilli{class}(94);Bacillales{order}(94);Planococcaceae{family}(94);Lysinibacillus{genus}(94);Unassigned{species}(0)	Bacteria	Firmicutes	Bacilli	Bacillales	Planococcaceae	Lysinibacillus	Unassigned
ASV936	45	7	70	70	91	0	0	0	0	11	0	22	0	0	16	332	Bacteria{superkingdom}(100);Planctomycetes{phylum}(100);Planctomycetia{class}(100);Planctomycetales{order}(100);Planctomycetaceae{family}(100);{genus}(100);Unassigned{species}(0)	Bacteria	Planctomycetes	Planctomycetia	Planctomycetales	Planctomycetaceae		Unassigned
ASV937	117	102	0	29	24	0	0	0	0	22	44	42	24	48	23	475	Bacteria{superkingdom}(100);Actinobacteria{phylum}(100);Actinobacteria{class}(100);Actinomycetales{order}(100);Sporichthyaceae{family}(100);Sporichthya{genus}(100);Unassigned{species}(0)	Bacteria	Actinobacteria	Actinobacteria	Actinomycetales	Sporichthyaceae	Sporichthya	Unassigned
ASV938	0	0	0	0	0	0	0	0	186	0	0	0	0	0	0	186	Bacteria{superkingdom}(100);Acidobacteria{phylum}(100);Acidobacteria_Gp7{class}(100);{order}(100);{family}(100);Gp7{genus}(100);Unassigned{species}(0)	Bacteria	Acidobacteria	Acidobacteria_Gp7			Gp7	Unassigned
ASV939	0	0	0	0	0	0	0	0	0	0	0	36	58	57	0	151	Bacteria{superkingdom}(100);Actinobacteria{phylum}(100);Actinobacteria{class}(100);Actinomycetales{order}(100);Geodermatophilaceae{family}(100);Unassigned{genus}(0);Unassigned{species}(0)	Bacteria	Actinobacteria	Actinobacteria	Actinomycetales	Geodermatophilaceae	Unassigned	Unassigned
ASV941	0	96	17	0	19	0	0	0	0	0	0	0	0	0	0	132	Bacteria{superkingdom}(93);Bacteroidetes{phylum}(93);Sphingobacteriia{class}(93);Sphingobacteriales{order}(93);Chitinophagaceae{family}(93);{genus}(93);Unassigned{species}(0)	Bacteria	Bacteroidetes	Sphingobacteriia	Sphingobacteriales	Chitinophagaceae		Unassigned
ASV942	0	0	0	67	681	0	0	0	0	61	46	21	0	24	0	900	Bacteria{superkingdom}(96);Bacteroidetes{phylum}(96);Sphingobacteriia{class}(96);Sphingobacteriales{order}(96);Chitinophagaceae{family}(96);{genus}(96);Unassigned{species}(0)	Bacteria	Bacteroidetes	Sphingobacteriia	Sphingobacteriales	Chitinophagaceae		Unassigned
ASV943	48	0	53	78	81	0	40	48	40	130	133	0	61	0	79	791	Bacteria{superkingdom}(100);Acidobacteria{phylum}(100);Acidobacteria_Gp6{class}(100);{order}(100);{family}(100);Gp6{genus}(100);Unassigned{species}(0)	Bacteria	Acidobacteria	Acidobacteria_Gp6			Gp6	Unassigned
ASV945	0	0	0	0	0	0	0	0	0	101	0	0	0	0	0	101	Bacteria{superkingdom}(100);Armatimonadetes{phylum}(100);Armatimonadia{class}(100);Armatimonadales{order}(100);Armatimonadaceae{family}(100);Armatimonas/Armatimonadetes_gp1{genus}(100);uncultured_bacterium{species}(100)	Bacteria	Armatimonadetes	Armatimonadia	Armatimonadales	Armatimonadaceae	Armatimonas/Armatimonadetes_gp1	uncultured_bacterium
ASV947	56	150	0	0	0	0	25	60	0	0	0	0	0	17	0	308	Bacteria{superkingdom}(98);Actinobacteria{phylum}(98);Actinobacteria{class}(98);Solirubrobacterales{order}(98);{family}(98);{genus}(98);Unassigned{species}(0)	Bacteria	Actinobacteria	Actinobacteria	Solirubrobacterales			Unassigned
ASV948	0	0	0	0	0	0	0	0	0	0	0	0	0	0	21	21	Bacteria{superkingdom}(100);Bacteroidetes{phylum}(100);Sphingobacteriia{class}(100);Sphingobacteriales{order}(100);Chitinophagaceae{family}(100);Flavisolibacter{genus}(100);Unassigned{species}(0)	Bacteria	Bacteroidetes	Sphingobacteriia	Sphingobacteriales	Chitinophagaceae	Flavisolibacter	Unassigned
ASV950	34	0	67	38	44	34	24	0	0	19	0	0	0	0	0	260	Bacteria{superkingdom}(100);Chloroflexi{phylum}(100);Chloroflexia{class}(100);{order}(100);{family}(100);{genus}(100);uncultured_bacterium{species}(100)	Bacteria	Chloroflexi	Chloroflexia				uncultured_bacterium
ASV951	14	46	0	29	0	0	0	0	19	0	3	0	0	0	0	111	Bacteria{superkingdom}(100);Bacteroidetes{phylum}(100);Sphingobacteriia{class}(100);Sphingobacteriales{order}(100);Chitinophagaceae{family}(100);Segetibacter{genus}(100);Unassigned{species}(0)	Bacteria	Bacteroidetes	Sphingobacteriia	Sphingobacteriales	Chitinophagaceae	Segetibacter	Unassigned
ASV952	61	0	0	0	0	0	0	0	0	0	0	0	0	0	0	61	Bacteria{superkingdom}(100);Bacteroidetes{phylum}(100);Cytophagia{class}(100);Cytophagales{order}(100);{family}(100);Ohtaekwangia{genus}(100);Unassigned{species}(0)	Bacteria	Bacteroidetes	Cytophagia	Cytophagales		Ohtaekwangia	Unassigned
ASV953	56	76	84	140	76	13	10	14	15	0	76	45	121	0	57	783	Bacteria{superkingdom}(100);Proteobacteria{phylum}(100);Alphaproteobacteria{class}(100);Sphingomonadales{order}(100);Sphingomonadaceae{family}(100);Novosphingobium{genus}(100);Unassigned{species}(0)	Bacteria	Proteobacteria	Alphaproteobacteria	Sphingomonadales	Sphingomonadaceae	Novosphingobium	Unassigned
ASV954	49	0	80	61	96	23	72	0	0	104	113	0	0	0	52	650	Bacteria{superkingdom}(96);Actinobacteria{phylum}(96);{class}(96);{order}(96);{family}(96);{genus}(96);uncultured_Rubrobacteridae_bacterium{species}(96)	Bacteria	Actinobacteria					uncultured_Rubrobacteridae_bacterium
ASV955	0	0	3	80	20	0	0	0	157	0	3419	772	0	0	98	4549	Bacteria{superkingdom}(84);Acidobacteria{phylum}(84);Acidobacteria_Gp10{class}(84);{order}(84);{family}(84);Gp10{genus}(84);uncultured_Firmicutes_bacterium{species}(84)	Bacteria	Acidobacteria	Acidobacteria_Gp10			Gp10	uncultured_Firmicutes_bacterium
ASV957	0	0	0	37	0	35	0	82	38	74	0	71	64	67	57	525	Bacteria{superkingdom}(98);Proteobacteria{phylum}(98);Deltaproteobacteria{class}(98);Myxococcales{order}(98);{family}(98);{genus}(98);Unassigned{species}(0)	Bacteria	Proteobacteria	Deltaproteobacteria	Myxococcales			Unassigned
ASV958	0	27	0	0	0	0	28	61	11	33	0	0	0	0	0	160	Bacteria{superkingdom}(100);Chloroflexi{phylum}(100);Caldilineae{class}(100);Caldilineales{order}(100);Caldilineaceae{family}(100);Litorilinea{genus}(100);uncultured_Rubrobacter_sp.{species}(100)	Bacteria	Chloroflexi	Caldilineae	Caldilineales	Caldilineaceae	Litorilinea	uncultured_Rubrobacter_sp.
ASV959	0	0	0	0	0	0	0	0	0	0	0	87	0	35	0	122	Bacteria{superkingdom}(95);Proteobacteria{phylum}(95);Alphaproteobacteria{class}(95);Rhizobiales{order}(95);Rhizobiaceae{family}(95);Rhizobium{genus}(95);Unassigned{species}(0)	Bacteria	Proteobacteria	Alphaproteobacteria	Rhizobiales	Rhizobiaceae	Rhizobium	Unassigned
ASV961	0	0	16	32	0	216	49	39	239	25	134	11	0	0	93	854	Bacteria{superkingdom}(94);{phylum}(94);{class}(94);{order}(94);{family}(94);{genus}(94);uncultured_candidate_division_SPAM_bacterium{species}(94)	Bacteria						uncultured_candidate_division_SPAM_bacterium
ASV963	35	0	57	29	17	23	21	41	29	38	0	0	64	0	32	386	Bacteria{superkingdom}(100);Actinobacteria{phylum}(100);Actinobacteria{class}(100);Gaiellales{order}(100);Gaiellaceae{family}(100);Gaiella{genus}(100);Unassigned{species}(0)	Bacteria	Actinobacteria	Actinobacteria	Gaiellales	Gaiellaceae	Gaiella	Unassigned
ASV964	113	0	1143	18	72	0	0	0	0	0	1231	0	0	0	6	2583	Bacteria{superkingdom}(100);{phylum}(100);{class}(100);{order}(100);{family}(100);{genus}(100);uncultured_Gemmatimonadetes_bacterium{species}(100)	Bacteria						uncultured_Gemmatimonadetes_bacterium
ASV965	15	0	7	0	0	84	21	0	0	0	0	88	39	0	6	260	Bacteria{superkingdom}(100);{phylum}(100);{class}(100);{order}(100);{family}(100);{genus}(100);uncultured_Actinomyces_sp.{species}(100)	Bacteria						uncultured_Actinomyces_sp.
ASV966	0	0	0	90	0	14	0	0	0	0	0	0	0	0	23	127	Bacteria{superkingdom}(86);Proteobacteria{phylum}(86);Alphaproteobacteria{class}(86);Rhizobiales{order}(86);Hyphomicrobiaceae{family}(86);Pedomicrobium{genus}(86);uncultured_alpha_proteobacterium{species}(86)	Bacteria	Proteobacteria	Alphaproteobacteria	Rhizobiales	Hyphomicrobiaceae	Pedomicrobium	uncultured_alpha_proteobacterium
ASV967	22	58	19	11	7	54	69	36	49	81	29	9	0	11	63	518	Bacteria{superkingdom}(94);Chloroflexi{phylum}(94);{class}(94);{order}(94);{family}(94);{genus}(94);bacterium_Ellin6543{species}(94)	Bacteria	Chloroflexi					bacterium_Ellin6543
ASV968	126	24	31	36	112	0	0	0	0	0	18	0	0	0	0	347	Bacteria{superkingdom}(96);Proteobacteria{phylum}(96);Betaproteobacteria{class}(96);Burkholderiales{order}(96);Oxalobacteraceae{family}(96);Unassigned{genus}(0);Unassigned{species}(0)	Bacteria	Proteobacteria	Betaproteobacteria	Burkholderiales	Oxalobacteraceae	Unassigned	Unassigned
ASV970	110	7	134	8	299	0	0	0	0	0	0	0	0	0	0	558	Bacteria{superkingdom}(100);Chloroflexi{phylum}(100);Thermomicrobia{class}(100);Sphaerobacterales{order}(100);Sphaerobacteraceae{family}(100);{genus}(100);Unassigned{species}(0)	Bacteria	Chloroflexi	Thermomicrobia	Sphaerobacterales	Sphaerobacteraceae		Unassigned
ASV971	32	95	7	0	85	0	0	299	0	0	0	0	0	0	0	518	Bacteria{superkingdom}(90);Acidobacteria{phylum}(90);Acidobacteria_Gp4{class}(90);{order}(90);{family}(90);Gp4{genus}(90);uncultured_Rhodopseudomonas_sp.{species}(90)	Bacteria	Acidobacteria	Acidobacteria_Gp4			Gp4	uncultured_Rhodopseudomonas_sp.
ASV972	0	70	0	0	0	0	0	0	0	0	0	0	0	0	0	70	Bacteria{superkingdom}(94);Actinobacteria{phylum}(94);Actinobacteria{class}(94);{order}(94);{family}(94);{genus}(94);uncultured_Frankia_sp.{species}(94)	Bacteria	Actinobacteria	Actinobacteria				uncultured_Frankia_sp.
ASV973	0	0	12	9	0	8	31	91	18	29	0	39	0	0	18	255	Bacteria{superkingdom}(100);Chloroflexi{phylum}(100);Chloroflexia{class}(100);Kallotenuales{order}(100);Kallotenuaceae{family}(100);Kallotenue{genus}(100);uncultured_bacterium{species}(100)	Bacteria	Chloroflexi	Chloroflexia	Kallotenuales	Kallotenuaceae	Kallotenue	uncultured_bacterium
ASV974	0	23	0	0	0	0	0	0	0	0	0	0	0	19	0	42	Bacteria{superkingdom}(100);Acidobacteria{phylum}(100);Acidobacteria_Gp6{class}(100);{order}(100);{family}(100);Gp6{genus}(100);Unassigned{species}(0)	Bacteria	Acidobacteria	Acidobacteria_Gp6			Gp6	Unassigned
ASV975	132	0	133	0	0	0	30	0	0	0	0	0	0	0	0	295	Bacteria{superkingdom}(100);Actinobacteria{phylum}(100);Actinobacteria{class}(100);Acidimicrobiales{order}(100);Unassigned{family}(0);Unassigned{genus}(0);Unassigned{species}(0)	Bacteria	Actinobacteria	Actinobacteria	Acidimicrobiales	Unassigned	Unassigned	Unassigned
ASV976	0	80	0	0	0	0	0	29	0	53	0	0	0	0	0	162	Bacteria{superkingdom}(100);Chloroflexi{phylum}(100);Chloroflexia{class}(100);Kallotenuales{order}(100);Kallotenuaceae{family}(100);Kallotenue{genus}(100);uncultured_bacterium{species}(100)	Bacteria	Chloroflexi	Chloroflexia	Kallotenuales	Kallotenuaceae	Kallotenue	uncultured_bacterium
ASV977	23	14	18	54	50	24	0	11	38	0	28	23	0	0	0	283	Bacteria{superkingdom}(82);Proteobacteria{phylum}(82);Gammaproteobacteria{class}(82);{order}(82);{family}(82);{genus}(82);uncultured_Steroidobacter_sp.{species}(82)	Bacteria	Proteobacteria	Gammaproteobacteria				uncultured_Steroidobacter_sp.
ASV978	21	96	27	0	32	0	0	0	0	12	0	38	16	44	0	286	Bacteria{superkingdom}(100);Actinobacteria{phylum}(100);Actinobacteria{class}(100);Actinomycetales{order}(100);Nocardioidaceae{family}(100);Nocardioides{genus}(100);Unassigned{species}(0)	Bacteria	Actinobacteria	Actinobacteria	Actinomycetales	Nocardioidaceae	Nocardioides	Unassigned
ASV979	81	0	0	0	97	0	0	0	0	34	0	0	0	406	0	618	Bacteria{superkingdom}(100);Actinobacteria{phylum}(100);Actinobacteria{class}(100);Actinomycetales{order}(100);Nocardioidaceae{family}(100);Nocardioides{genus}(100);Unassigned{species}(0)	Bacteria	Actinobacteria	Actinobacteria	Actinomycetales	Nocardioidaceae	Nocardioides	Unassigned
ASV980	0	62	0	0	23	69	77	97	27	142	132	121	122	150	342	1364	Bacteria{superkingdom}(100);Proteobacteria{phylum}(100);Alphaproteobacteria{class}(100);Rhodobacterales{order}(100);Rhodobacteraceae{family}(100);Rubellimicrobium{genus}(100);Unassigned{species}(0)	Bacteria	Proteobacteria	Alphaproteobacteria	Rhodobacterales	Rhodobacteraceae	Rubellimicrobium	Unassigned
ASV981	0	0	0	43	5	0	0	24	0	14	0	99	87	58	38	368	Bacteria{superkingdom}(86);Verrucomicrobia{phylum}(86);Opitutae{class}(86);Opitutales{order}(86);Opitutaceae{family}(86);Opitutus{genus}(86);uncultured_Opitutaceae_bacterium{species}(86)	Bacteria	Verrucomicrobia	Opitutae	Opitutales	Opitutaceae	Opitutus	uncultured_Opitutaceae_bacterium
ASV982	0	0	0	0	0	0	102	0	0	0	0	0	0	0	0	102	Bacteria{superkingdom}(99);Proteobacteria{phylum}(99);Gammaproteobacteria{class}(99);{order}(99);{family}(99);{genus}(99);uncultured_Steroidobacter_sp.{species}(99)	Bacteria	Proteobacteria	Gammaproteobacteria				uncultured_Steroidobacter_sp.
ASV983	117	24	53	4	43	35	0	0	28	0	0	9	26	75	16	430	Bacteria{superkingdom}(100);Planctomycetes{phylum}(100);Planctomycetia{class}(100);Planctomycetales{order}(100);Planctomycetaceae{family}(100);Pirellula{genus}(100);Unassigned{species}(0)	Bacteria	Planctomycetes	Planctomycetia	Planctomycetales	Planctomycetaceae	Pirellula	Unassigned
ASV984	25	0	0	0	58	25	0	0	0	0	38	0	0	68	44	258	Bacteria{superkingdom}(97);Planctomycetes{phylum}(97);Planctomycetia{class}(97);Planctomycetales{order}(97);Planctomycetaceae{family}(97);Blastopirellula{genus}(97);uncultured_bacterium{species}(97)	Bacteria	Planctomycetes	Planctomycetia	Planctomycetales	Planctomycetaceae	Blastopirellula	uncultured_bacterium
ASV985	0	15	0	0	0	0	0	15	0	0	0	0	0	22	0	52	Bacteria{superkingdom}(87);Proteobacteria{phylum}(87);Alphaproteobacteria{class}(87);Rhizobiales{order}(87);Methylobacteriaceae{family}(87);{genus}(87);uncultured_bacterium{species}(87)	Bacteria	Proteobacteria	Alphaproteobacteria	Rhizobiales	Methylobacteriaceae		uncultured_bacterium
ASV986	15	63	44	29	16	0	32	60	83	76	31	78	97	41	169	834	Bacteria{superkingdom}(83);Chloroflexi{phylum}(83);Anaerolineae{class}(83);Anaerolineales{order}(83);Anaerolineaceae{family}(83);{genus}(83);Unassigned{species}(0)	Bacteria	Chloroflexi	Anaerolineae	Anaerolineales	Anaerolineaceae		Unassigned
ASV987	0	0	0	0	0	0	0	0	0	0	0	10	15	0	0	25	Bacteria{superkingdom}(100);Actinobacteria{phylum}(100);Actinobacteria{class}(100);Actinomycetales{order}(100);Microbacteriaceae{family}(100);Microbacterium{genus}(100);Unassigned{species}(0)	Bacteria	Actinobacteria	Actinobacteria	Actinomycetales	Microbacteriaceae	Microbacterium	Unassigned
ASV989	97	0	92	30	298	0	0	0	0	128	0	0	0	0	0	645	Bacteria{superkingdom}(100);Verrucomicrobia{phylum}(100);Opitutae{class}(100);Opitutales{order}(100);Opitutaceae{family}(100);Opitutus{genus}(100);Unassigned{species}(0)	Bacteria	Verrucomicrobia	Opitutae	Opitutales	Opitutaceae	Opitutus	Unassigned
ASV990	0	0	0	0	0	0	0	0	0	0	0	26	0	17	19	62	Bacteria{superkingdom}(100);Bacteroidetes{phylum}(100);Sphingobacteriia{class}(100);Sphingobacteriales{order}(100);Chitinophagaceae{family}(100);Flavisolibacter{genus}(100);Unassigned{species}(0)	Bacteria	Bacteroidetes	Sphingobacteriia	Sphingobacteriales	Chitinophagaceae	Flavisolibacter	Unassigned
ASV991	63	0	0	0	125	0	0	0	15	0	0	0	0	0	0	203	Bacteria{superkingdom}(85);Proteobacteria{phylum}(85);Alphaproteobacteria{class}(85);Rhizobiales{order}(85);Hyphomicrobiaceae{family}(85);Hyphomicrobium{genus}(85);Unassigned{species}(0)	Bacteria	Proteobacteria	Alphaproteobacteria	Rhizobiales	Hyphomicrobiaceae	Hyphomicrobium	Unassigned
ASV992	0	0	0	0	0	0	0	24	0	17	0	0	0	0	0	41	Bacteria{superkingdom}(99);Chloroflexi{phylum}(99);{class}(99);{order}(99);{family}(99);{genus}(99);uncultured_Sphaerobacter_sp.{species}(99)	Bacteria	Chloroflexi					uncultured_Sphaerobacter_sp.
ASV993	44	28	51	0	0	0	0	0	0	0	0	0	0	29	0	152	Bacteria{superkingdom}(90);Acidobacteria{phylum}(90);Acidobacteria_Gp16{class}(90);{order}(90);{family}(90);Gp16{genus}(90);uncultured_Chloroflexi_bacterium{species}(90)	Bacteria	Acidobacteria	Acidobacteria_Gp16			Gp16	uncultured_Chloroflexi_bacterium
ASV994	0	15	0	0	0	27	175	48	0	0	0	11	30	0	35	341	Bacteria{superkingdom}(100);Bacteroidetes{phylum}(100);Sphingobacteriia{class}(100);Sphingobacteriales{order}(100);Chitinophagaceae{family}(100);Segetibacter{genus}(100);Unassigned{species}(0)	Bacteria	Bacteroidetes	Sphingobacteriia	Sphingobacteriales	Chitinophagaceae	Segetibacter	Unassigned
ASV995	43	0	464	62	0	0	0	0	0	0	4	0	0	0	0	573	Bacteria{superkingdom}(100);Unassigned{phylum}(0);Unassigned{class}(0);Unassigned{order}(0);Unassigned{family}(0);Unassigned{genus}(0);Unassigned{species}(0)	Bacteria	Unassigned	Unassigned	Unassigned	Unassigned	Unassigned	Unassigned
ASV996	0	43	0	0	0	0	0	0	0	16	0	0	0	0	0	59	Bacteria{superkingdom}(99);Proteobacteria{phylum}(99);Alphaproteobacteria{class}(99);Rhizobiales{order}(99);{family}(99);{genus}(99);uncultured_endolithic_bacterium{species}(99)	Bacteria	Proteobacteria	Alphaproteobacteria	Rhizobiales			uncultured_endolithic_bacterium
ASV997	0	0	0	16	0	0	0	0	0	0	0	0	0	0	0	16	Bacteria{superkingdom}(99);Actinobacteria{phylum}(99);Actinobacteria{class}(99);Actinomycetales{order}(99);Thermomonosporaceae{family}(99);Unassigned{genus}(0);Unassigned{species}(0)	Bacteria	Actinobacteria	Actinobacteria	Actinomycetales	Thermomonosporaceae	Unassigned	Unassigned
ASV998	0	148	0	0	0	0	0	0	0	0	0	0	0	0	0	148	Bacteria{superkingdom}(100);Actinobacteria{phylum}(100);Actinobacteria{class}(100);Actinomycetales{order}(100);Streptomycetaceae{family}(100);Streptomyces{genus}(100);Unassigned{species}(0)	Bacteria	Actinobacteria	Actinobacteria	Actinomycetales	Streptomycetaceae	Streptomyces	Unassigned
ASV999	23	0	0	0	0	34	0	0	15	38	29	0	43	0	25	207	Bacteria{superkingdom}(100);Acidobacteria{phylum}(100);Acidobacteria_Gp6{class}(100);{order}(100);{family}(100);Gp6{genus}(100);Unassigned{species}(0)	Bacteria	Acidobacteria	Acidobacteria_Gp6			Gp6	Unassigned
ASV1002	0	3	0	0	0	0	0	0	0	0	0	0	0	0	0	3	Bacteria{superkingdom}(100);Bacteroidetes{phylum}(100);Sphingobacteriia{class}(100);Sphingobacteriales{order}(100);Chitinophagaceae{family}(100);{genus}(100);Unassigned{species}(0)	Bacteria	Bacteroidetes	Sphingobacteriia	Sphingobacteriales	Chitinophagaceae		Unassigned
ASV1003	0	112	0	0	0	0	0	0	0	0	0	0	0	0	0	112	Bacteria{superkingdom}(97);Actinobacteria{phylum}(97);Actinobacteria{class}(97);Unassigned{order}(0);Unassigned{family}(0);Unassigned{genus}(0);Unassigned{species}(0)	Bacteria	Actinobacteria	Actinobacteria	Unassigned	Unassigned	Unassigned	Unassigned
ASV1004	39	105	105	34	37	33	0	15	67	67	100	143	121	25	138	1029	Bacteria{superkingdom}(100);Acidobacteria{phylum}(100);Acidobacteria_Gp16{class}(100);{order}(100);{family}(100);Gp16{genus}(100);Unassigned{species}(0)	Bacteria	Acidobacteria	Acidobacteria_Gp16			Gp16	Unassigned
ASV1005	18	64	0	24	27	29	0	59	12	67	29	25	0	115	0	469	Bacteria{superkingdom}(100);Proteobacteria{phylum}(100);Alphaproteobacteria{class}(100);Rhizobiales{order}(100);Hyphomicrobiaceae{family}(100);Unassigned{genus}(0);Unassigned{species}(0)	Bacteria	Proteobacteria	Alphaproteobacteria	Rhizobiales	Hyphomicrobiaceae	Unassigned	Unassigned
ASV1006	165	0	161	232	120	41	54	69	121	0	31	0	75	0	0	1069	Bacteria{superkingdom}(100);Firmicutes{phylum}(100);Bacilli{class}(100);Bacillales{order}(100);Paenibacillaceae_1{family}(100);Paenibacillus{genus}(100);Unassigned{species}(0)	Bacteria	Firmicutes	Bacilli	Bacillales	Paenibacillaceae_1	Paenibacillus	Unassigned
ASV1007	26	33	0	0	0	0	19	18	0	0	0	0	0	0	0	96	Bacteria{superkingdom}(91);Actinobacteria{phylum}(91);Actinobacteria{class}(91);Euzebyales{order}(91);Euzebyaceae{family}(91);Euzebya{genus}(91);uncultured_bacterium{species}(91)	Bacteria	Actinobacteria	Actinobacteria	Euzebyales	Euzebyaceae	Euzebya	uncultured_bacterium
ASV1008	0	0	0	0	0	0	0	0	0	0	0	31	0	51	0	82	Bacteria{superkingdom}(100);Proteobacteria{phylum}(100);Alphaproteobacteria{class}(100);Rhizobiales{order}(100);Methylobacteriaceae{family}(100);Microvirga{genus}(100);Unassigned{species}(0)	Bacteria	Proteobacteria	Alphaproteobacteria	Rhizobiales	Methylobacteriaceae	Microvirga	Unassigned
ASV1009	0	0	0	26	0	0	0	0	0	0	0	107	0	121	0	254	Bacteria{superkingdom}(100);Bacteroidetes{phylum}(100);Cytophagia{class}(100);Cytophagales{order}(100);{family}(100);Ohtaekwangia{genus}(100);Unassigned{species}(0)	Bacteria	Bacteroidetes	Cytophagia	Cytophagales		Ohtaekwangia	Unassigned
ASV1011	35	0	0	0	0	0	0	0	72	0	0	0	0	0	0	107	Bacteria{superkingdom}(100);Proteobacteria{phylum}(100);Alphaproteobacteria{class}(100);Rhizobiales{order}(100);Unassigned{family}(0);Unassigned{genus}(0);Unassigned{species}(0)	Bacteria	Proteobacteria	Alphaproteobacteria	Rhizobiales	Unassigned	Unassigned	Unassigned
ASV1012	13	25	11	15	26	1	0	3	8	8	0	8	2	3	2	125	Bacteria{superkingdom}(96);Proteobacteria{phylum}(96);Alphaproteobacteria{class}(96);Rhizobiales{order}(96);Rhizobiales_incertae_sedis{family}(96);Vasilyevaea{genus}(96);uncultured_bacterium{species}(96)	Bacteria	Proteobacteria	Alphaproteobacteria	Rhizobiales	Rhizobiales_incertae_sedis	Vasilyevaea	uncultured_bacterium
ASV1013	0	56	0	0	29	0	32	0	54	0	0	0	166	122	0	459	Bacteria{superkingdom}(96);Proteobacteria{phylum}(96);Alphaproteobacteria{class}(96);Sphingomonadales{order}(96);Sphingomonadaceae{family}(96);Novosphingobium{genus}(96);Unassigned{species}(0)	Bacteria	Proteobacteria	Alphaproteobacteria	Sphingomonadales	Sphingomonadaceae	Novosphingobium	Unassigned
ASV1014	0	0	0	41	0	0	0	0	0	0	0	0	0	0	0	41	Bacteria{superkingdom}(100);Planctomycetes{phylum}(100);Planctomycetia{class}(100);Planctomycetales{order}(100);Planctomycetaceae{family}(100);{genus}(100);uncultured_Pasteuria_sp.{species}(100)	Bacteria	Planctomycetes	Planctomycetia	Planctomycetales	Planctomycetaceae		uncultured_Pasteuria_sp.
ASV1015	70	0	49	0	59	0	0	19	0	12	0	23	16	0	0	248	Bacteria{superkingdom}(84);Proteobacteria{phylum}(84);Alphaproteobacteria{class}(84);Rhizobiales{order}(84);Hyphomicrobiaceae{family}(84);Pedomicrobium{genus}(84);uncultured_alpha_proteobacterium{species}(84)	Bacteria	Proteobacteria	Alphaproteobacteria	Rhizobiales	Hyphomicrobiaceae	Pedomicrobium	uncultured_alpha_proteobacterium
ASV1016	0	0	0	0	0	0	0	0	0	11	0	0	0	0	0	11	Bacteria{superkingdom}(100);Bacteroidetes{phylum}(100);Cytophagia{class}(100);Cytophagales{order}(100);Cytophagaceae{family}(100);Rhodocytophaga{genus}(100);uncultured_Bacteroidetes_bacterium{species}(100)	Bacteria	Bacteroidetes	Cytophagia	Cytophagales	Cytophagaceae	Rhodocytophaga	uncultured_Bacteroidetes_bacterium
ASV1017	21	0	0	32	0	55	58	84	17	25	0	0	0	0	0	292	Bacteria{superkingdom}(100);Actinobacteria{phylum}(100);Actinobacteria{class}(100);Gaiellales{order}(100);Gaiellaceae{family}(100);Gaiella{genus}(100);Unassigned{species}(0)	Bacteria	Actinobacteria	Actinobacteria	Gaiellales	Gaiellaceae	Gaiella	Unassigned
ASV1018	55	0	94	74	176	0	0	0	0	0	0	6	0	5	15	425	Bacteria{superkingdom}(100);Actinobacteria{phylum}(100);Actinobacteria{class}(100);Actinomycetales{order}(100);Microbacteriaceae{family}(100);Unassigned{genus}(0);Unassigned{species}(0)	Bacteria	Actinobacteria	Actinobacteria	Actinomycetales	Microbacteriaceae	Unassigned	Unassigned
ASV1019	0	0	0	0	0	0	0	0	0	0	0	64	18	0	0	82	Bacteria{superkingdom}(100);{phylum}(100);{class}(100);{order}(100);{family}(100);{genus}(100);uncultured_Gemmatimonadetes_bacterium{species}(100)	Bacteria						uncultured_Gemmatimonadetes_bacterium
ASV1020	0	6	0	0	0	0	0	0	0	23	0	0	0	18	0	47	Bacteria{superkingdom}(92);Proteobacteria{phylum}(92);Betaproteobacteria{class}(92);Burkholderiales{order}(92);Comamonadaceae{family}(92);Variovorax{genus}(92);Unassigned{species}(0)	Bacteria	Proteobacteria	Betaproteobacteria	Burkholderiales	Comamonadaceae	Variovorax	Unassigned
ASV1021	0	24	0	15	0	0	0	0	12	97	0	39	40	0	0	227	Bacteria{superkingdom}(100);Planctomycetes{phylum}(100);Planctomycetia{class}(100);Planctomycetales{order}(100);Planctomycetaceae{family}(100);Unassigned{genus}(0);Unassigned{species}(0)	Bacteria	Planctomycetes	Planctomycetia	Planctomycetales	Planctomycetaceae	Unassigned	Unassigned
ASV1022	0	101	0	0	0	0	0	0	0	0	0	39	955	141	93	1329	Bacteria{superkingdom}(100);Actinobacteria{phylum}(100);Unassigned{class}(0);Unassigned{order}(0);Unassigned{family}(0);Unassigned{genus}(0);Unassigned{species}(0)	Bacteria	Actinobacteria	Unassigned	Unassigned	Unassigned	Unassigned	Unassigned
ASV1023	115	0	22	0	35	35	0	0	0	0	0	0	0	0	100	307	Bacteria{superkingdom}(100);Acidobacteria{phylum}(100);Acidobacteria_Gp10{class}(100);{order}(100);{family}(100);Gp10{genus}(100);Unassigned{species}(0)	Bacteria	Acidobacteria	Acidobacteria_Gp10			Gp10	Unassigned
ASV1024	0	0	0	24	0	0	0	30	0	14	0	0	0	0	0	68	Bacteria{superkingdom}(95);Actinobacteria{phylum}(95);Actinobacteria{class}(95);Solirubrobacterales{order}(95);Unassigned{family}(0);Unassigned{genus}(0);Unassigned{species}(0)	Bacteria	Actinobacteria	Actinobacteria	Solirubrobacterales	Unassigned	Unassigned	Unassigned
ASV1026	0	0	0	0	0	64	22	67	0	130	0	0	198	50	36	567	Bacteria{superkingdom}(100);Acidobacteria{phylum}(100);Acidobacteria_Gp6{class}(100);{order}(100);{family}(100);Gp6{genus}(100);Unassigned{species}(0)	Bacteria	Acidobacteria	Acidobacteria_Gp6			Gp6	Unassigned
ASV1027	0	0	6	0	30	145	0	0	0	0	12	0	0	0	11	204	Bacteria{superkingdom}(100);Ignavibacteriae{phylum}(100);Ignavibacteria{class}(100);Ignavibacteriales{order}(100);Ignavibacteriaceae{family}(100);Unassigned{genus}(0);Unassigned{species}(0)	Bacteria	Ignavibacteriae	Ignavibacteria	Ignavibacteriales	Ignavibacteriaceae	Unassigned	Unassigned
ASV1028	0	0	0	9	0	0	0	0	78	0	103	236	67	0	67	560	Bacteria{superkingdom}(85);Actinobacteria{phylum}(85);Actinobacteria{class}(85);Solirubrobacterales{order}(85);Solirubrobacteraceae{family}(85);Solirubrobacter{genus}(85);Unassigned{species}(0)	Bacteria	Actinobacteria	Actinobacteria	Solirubrobacterales	Solirubrobacteraceae	Solirubrobacter	Unassigned
ASV1029	0	0	0	0	0	0	0	0	0	0	0	11	0	0	0	11	Bacteria{superkingdom}(88);Armatimonadetes{phylum}(88);{class}(88);{order}(88);{family}(88);Armatimonadetes_gp4{genus}(88);uncultured_actinobacterium{species}(88)	Bacteria	Armatimonadetes				Armatimonadetes_gp4	uncultured_actinobacterium
ASV1030	0	54	0	0	0	0	0	0	0	45	0	0	18	70	0	187	Bacteria{superkingdom}(100);Proteobacteria{phylum}(100);Alphaproteobacteria{class}(100);Rhodospirillales{order}(100);Rhodospirillaceae{family}(100);Constrictibacter{genus}(100);uncultured_soil_bacterium{species}(100)	Bacteria	Proteobacteria	Alphaproteobacteria	Rhodospirillales	Rhodospirillaceae	Constrictibacter	uncultured_soil_bacterium
ASV1031	21	0	0	312	165	0	0	0	28	0	0	0	0	0	0	526	Bacteria{superkingdom}(100);Acidobacteria{phylum}(100);Acidobacteria_Gp7{class}(100);{order}(100);{family}(100);Gp7{genus}(100);Unassigned{species}(0)	Bacteria	Acidobacteria	Acidobacteria_Gp7			Gp7	Unassigned
ASV1032	0	8	21	21	74	23	8	0	8	0	15	6	0	9	26	219	Bacteria{superkingdom}(100);Proteobacteria{phylum}(100);Alphaproteobacteria{class}(100);Rhizobiales{order}(100);Xanthobacteraceae{family}(100);Unassigned{genus}(0);Unassigned{species}(0)	Bacteria	Proteobacteria	Alphaproteobacteria	Rhizobiales	Xanthobacteraceae	Unassigned	Unassigned
ASV1034	0	61	0	0	0	0	0	32	21	80	0	77	96	39	84	490	Bacteria{superkingdom}(100);Actinobacteria{phylum}(100);Actinobacteria{class}(100);Actinomycetales{order}(100);Nocardioidaceae{family}(100);Nocardioides{genus}(100);Unassigned{species}(0)	Bacteria	Actinobacteria	Actinobacteria	Actinomycetales	Nocardioidaceae	Nocardioides	Unassigned
ASV1035	13	8	0	13	29	18	44	23	67	21	0	0	0	0	0	236	Bacteria{superkingdom}(99);Gemmatimonadetes{phylum}(99);Gemmatimonadetes{class}(99);Gemmatimonadales{order}(99);Gemmatimonadaceae{family}(99);Gemmatimonas{genus}(99);uncultured_prokaryote{species}(99)	Bacteria	Gemmatimonadetes	Gemmatimonadetes	Gemmatimonadales	Gemmatimonadaceae	Gemmatimonas	uncultured_prokaryote
ASV1036	93	0	0	64	128	0	0	0	0	0	0	0	0	0	0	285	Bacteria{superkingdom}(100);Actinobacteria{phylum}(100);Actinobacteria{class}(100);Actinomycetales{order}(100);Nocardioidaceae{family}(100);Nocardioides{genus}(100);Unassigned{species}(0)	Bacteria	Actinobacteria	Actinobacteria	Actinomycetales	Nocardioidaceae	Nocardioides	Unassigned
ASV1038	66	34	53	0	54	59	77	68	0	0	0	0	0	0	0	411	Bacteria{superkingdom}(93);Planctomycetes{phylum}(93);Planctomycetia{class}(93);Planctomycetales{order}(93);Planctomycetaceae{family}(93);Pirellula{genus}(93);uncultured_Planctomycetacia_bacterium{species}(93)	Bacteria	Planctomycetes	Planctomycetia	Planctomycetales	Planctomycetaceae	Pirellula	uncultured_Planctomycetacia_bacterium
ASV1039	0	10	0	16	0	33	20	26	0	50	21	46	416	88	19	745	Bacteria{superkingdom}(97);Acidobacteria{phylum}(97);{class}(97);{order}(97);{family}(97);{genus}(97);uncultured_Acidobacteriales_bacterium{species}(97)	Bacteria	Acidobacteria					uncultured_Acidobacteriales_bacterium
ASV1040	0	0	0	39	39	35	74	55	0	53	0	0	0	0	0	295	Bacteria{superkingdom}(93);Acidobacteria{phylum}(93);{class}(93);{order}(93);{family}(93);{genus}(93);uncultured_Geobacter_sp.{species}(93)	Bacteria	Acidobacteria					uncultured_Geobacter_sp.
ASV1041	44	0	67	0	0	0	27	0	25	22	0	19	0	0	37	241	Bacteria{superkingdom}(99);Proteobacteria{phylum}(99);Alphaproteobacteria{class}(99);Rhizobiales{order}(99);Rhizobiaceae{family}(99);Rhizobium{genus}(99);Unassigned{species}(0)	Bacteria	Proteobacteria	Alphaproteobacteria	Rhizobiales	Rhizobiaceae	Rhizobium	Unassigned
ASV1042	18	0	0	0	0	0	0	0	0	0	0	0	0	0	0	18	Bacteria{superkingdom}(100);Acidobacteria{phylum}(100);Acidobacteria_Gp7{class}(100);{order}(100);{family}(100);Gp7{genus}(100);Unassigned{species}(0)	Bacteria	Acidobacteria	Acidobacteria_Gp7			Gp7	Unassigned
ASV1043	0	27	0	10	17	0	0	0	0	0	0	38	0	0	0	92	Bacteria{superkingdom}(91);Proteobacteria{phylum}(91);Alphaproteobacteria{class}(91);Rhodobacterales{order}(91);Rhodobacteraceae{family}(91);Rubellimicrobium{genus}(91);uncultured_bacterium{species}(91)	Bacteria	Proteobacteria	Alphaproteobacteria	Rhodobacterales	Rhodobacteraceae	Rubellimicrobium	uncultured_bacterium
ASV1044	0	0	0	8	0	11	81	37	4	50	0	0	3	0	0	194	Bacteria{superkingdom}(99);Chloroflexi{phylum}(99);Unassigned{class}(0);Unassigned{order}(0);Unassigned{family}(0);Unassigned{genus}(0);Unassigned{species}(0)	Bacteria	Chloroflexi	Unassigned	Unassigned	Unassigned	Unassigned	Unassigned
ASV1047	0	0	0	0	0	0	0	0	0	0	0	0	0	10	0	10	Bacteria{superkingdom}(100);Proteobacteria{phylum}(100);Alphaproteobacteria{class}(100);Rhizobiales{order}(100);Unassigned{family}(0);Unassigned{genus}(0);Unassigned{species}(0)	Bacteria	Proteobacteria	Alphaproteobacteria	Rhizobiales	Unassigned	Unassigned	Unassigned
ASV1048	2	35	5	0	11	0	0	0	0	5	0	219	144	10	0	431	Bacteria{superkingdom}(100);Actinobacteria{phylum}(100);Actinobacteria{class}(100);Actinomycetales{order}(100);Nocardioidaceae{family}(100);Nocardioides{genus}(100);Unassigned{species}(0)	Bacteria	Actinobacteria	Actinobacteria	Actinomycetales	Nocardioidaceae	Nocardioides	Unassigned
ASV1049	19	10	0	0	0	0	0	0	0	0	11	9	0	30	0	79	Bacteria{superkingdom}(100);Proteobacteria{phylum}(100);Alphaproteobacteria{class}(100);Unassigned{order}(0);Unassigned{family}(0);Unassigned{genus}(0);Unassigned{species}(0)	Bacteria	Proteobacteria	Alphaproteobacteria	Unassigned	Unassigned	Unassigned	Unassigned
ASV1050	18	0	0	11	0	123	41	40	31	34	56	20	0	30	24	428	Bacteria{superkingdom}(88);Gemmatimonadetes{phylum}(88);Gemmatimonadetes{class}(88);Gemmatimonadales{order}(88);Gemmatimonadaceae{family}(88);Gemmatimonas{genus}(88);uncultured_bacterium{species}(88)	Bacteria	Gemmatimonadetes	Gemmatimonadetes	Gemmatimonadales	Gemmatimonadaceae	Gemmatimonas	uncultured_bacterium
ASV1051	0	0	0	17	0	16	6	58	0	51	0	0	181	0	0	329	Bacteria{superkingdom}(99);Acidobacteria{phylum}(99);Acidobacteria_Gp6{class}(99);{order}(99);{family}(99);Gp6{genus}(99);Unassigned{species}(0)	Bacteria	Acidobacteria	Acidobacteria_Gp6			Gp6	Unassigned
ASV1053	210	66	0	0	59	0	58	0	0	35	0	0	0	0	0	428	Bacteria{superkingdom}(98);Acidobacteria{phylum}(98);Acidobacteria_Gp16{class}(98);{order}(98);{family}(98);Gp16{genus}(98);uncultured_bacterium{species}(98)	Bacteria	Acidobacteria	Acidobacteria_Gp16			Gp16	uncultured_bacterium
ASV1054	0	0	0	0	0	0	0	0	0	6	0	17	7	0	0	30	Bacteria{superkingdom}(100);Chloroflexi{phylum}(100);Thermomicrobia{class}(100);Sphaerobacterales{order}(100);Sphaerobacteraceae{family}(100);Unassigned{genus}(0);Unassigned{species}(0)	Bacteria	Chloroflexi	Thermomicrobia	Sphaerobacterales	Sphaerobacteraceae	Unassigned	Unassigned
ASV1057	0	92	0	0	0	0	0	0	16	0	0	0	0	0	21	129	Bacteria{superkingdom}(92);Actinobacteria{phylum}(92);Actinobacteria{class}(92);Acidimicrobiales{order}(92);Acidimicrobineae_incertae_sedis{family}(92);Aciditerrimonas{genus}(92);Unassigned{species}(0)	Bacteria	Actinobacteria	Actinobacteria	Acidimicrobiales	Acidimicrobineae_incertae_sedis	Aciditerrimonas	Unassigned
ASV1058	0	200	0	0	0	0	0	0	0	0	0	0	0	0	0	200	Bacteria{superkingdom}(100);Acidobacteria{phylum}(100);Acidobacteria_Gp4{class}(100);{order}(100);{family}(100);Gp4{genus}(100);Unassigned{species}(0)	Bacteria	Acidobacteria	Acidobacteria_Gp4			Gp4	Unassigned
ASV1059	0	0	0	0	0	0	0	0	16	0	0	36	0	34	0	86	Bacteria{superkingdom}(100);Actinobacteria{phylum}(100);Actinobacteria{class}(100);Actinomycetales{order}(100);Geodermatophilaceae{family}(100);Unassigned{genus}(0);Unassigned{species}(0)	Bacteria	Actinobacteria	Actinobacteria	Actinomycetales	Geodermatophilaceae	Unassigned	Unassigned
ASV1060	0	22	0	0	0	0	0	0	0	0	0	0	0	21	0	43	Bacteria{superkingdom}(100);Actinobacteria{phylum}(100);Actinobacteria{class}(100);Actinomycetales{order}(100);Pseudonocardiaceae{family}(100);Unassigned{genus}(0);Unassigned{species}(0)	Bacteria	Actinobacteria	Actinobacteria	Actinomycetales	Pseudonocardiaceae	Unassigned	Unassigned
ASV1061	0	0	0	46	53	0	0	35	30	0	0	15	0	21	0	200	Bacteria{superkingdom}(86);Planctomycetes{phylum}(86);Planctomycetia{class}(86);Planctomycetales{order}(86);Planctomycetaceae{family}(86);{genus}(86);Unassigned{species}(0)	Bacteria	Planctomycetes	Planctomycetia	Planctomycetales	Planctomycetaceae		Unassigned
ASV1062	0	71	0	0	0	0	32	0	0	0	0	0	0	0	0	103	Bacteria{superkingdom}(100);Actinobacteria{phylum}(100);Actinobacteria{class}(100);Actinomycetales{order}(100);Unassigned{family}(0);Unassigned{genus}(0);Unassigned{species}(0)	Bacteria	Actinobacteria	Actinobacteria	Actinomycetales	Unassigned	Unassigned	Unassigned
ASV1064	0	0	0	0	0	0	0	38	0	0	23	67	48	18	0	194	Bacteria{superkingdom}(94);{phylum}(94);{class}(94);{order}(94);{family}(94);{genus}(94);Unassigned{species}(0)	Bacteria						Unassigned
ASV1065	116	114	74	17	54	476	68	22	13	60	0	0	0	0	9	1023	Bacteria{superkingdom}(100);Chloroflexi{phylum}(100);Chloroflexia{class}(100);{order}(100);{family}(100);{genus}(100);uncultured_bacterium{species}(100)	Bacteria	Chloroflexi	Chloroflexia				uncultured_bacterium
ASV1066	0	0	0	25	0	0	0	0	14	0	0	0	0	0	0	39	Bacteria{superkingdom}(99);Actinobacteria{phylum}(99);Actinobacteria{class}(99);Actinomycetales{order}(99);Streptomycetaceae{family}(99);Streptomyces{genus}(99);Unassigned{species}(0)	Bacteria	Actinobacteria	Actinobacteria	Actinomycetales	Streptomycetaceae	Streptomyces	Unassigned
ASV1067	0	0	0	0	0	0	0	0	0	0	0	0	0	30	0	30	Bacteria{superkingdom}(100);Proteobacteria{phylum}(100);Alphaproteobacteria{class}(100);Rhizobiales{order}(100);Hyphomicrobiaceae{family}(100);Devosia{genus}(100);Unassigned{species}(0)	Bacteria	Proteobacteria	Alphaproteobacteria	Rhizobiales	Hyphomicrobiaceae	Devosia	Unassigned
ASV1069	36	0	26	27	38	15	9	22	34	28	37	79	24	24	23	422	Bacteria{superkingdom}(92);Proteobacteria{phylum}(92);Alphaproteobacteria{class}(92);Rhizobiales{order}(92);Phyllobacteriaceae{family}(92);Mesorhizobium{genus}(92);Unassigned{species}(0)	Bacteria	Proteobacteria	Alphaproteobacteria	Rhizobiales	Phyllobacteriaceae	Mesorhizobium	Unassigned
ASV1070	0	0	0	0	0	0	0	0	7	6	0	6	15	0	0	34	Bacteria{superkingdom}(100);Bacteroidetes{phylum}(100);Sphingobacteriia{class}(100);Sphingobacteriales{order}(100);Chitinophagaceae{family}(100);Unassigned{genus}(0);Unassigned{species}(0)	Bacteria	Bacteroidetes	Sphingobacteriia	Sphingobacteriales	Chitinophagaceae	Unassigned	Unassigned
ASV1071	41	43	26	0	0	32	49	56	0	68	18	90	87	0	35	545	Bacteria{superkingdom}(100);Actinobacteria{phylum}(100);Actinobacteria{class}(100);Actinomycetales{order}(100);Unassigned{family}(0);Unassigned{genus}(0);Unassigned{species}(0)	Bacteria	Actinobacteria	Actinobacteria	Actinomycetales	Unassigned	Unassigned	Unassigned
ASV1072	10	0	0	391	132	0	16	19	33	0	41	20	0	0	0	662	Bacteria{superkingdom}(85);Proteobacteria{phylum}(85);Gammaproteobacteria{class}(85);Xanthomonadales{order}(85);Sinobacteraceae{family}(85);Povalibacter{genus}(85);uncultured_bacterium{species}(85)	Bacteria	Proteobacteria	Gammaproteobacteria	Xanthomonadales	Sinobacteraceae	Povalibacter	uncultured_bacterium
ASV1074	16	0	37	21	0	22	29	31	51	31	12	95	0	33	5	383	Bacteria{superkingdom}(100);Planctomycetes{phylum}(100);Planctomycetia{class}(100);Planctomycetales{order}(100);Planctomycetaceae{family}(100);Pirellula{genus}(100);Unassigned{species}(0)	Bacteria	Planctomycetes	Planctomycetia	Planctomycetales	Planctomycetaceae	Pirellula	Unassigned
ASV1076	0	0	0	0	0	0	0	0	0	27	0	9	53	19	21	129	Bacteria{superkingdom}(94);Proteobacteria{phylum}(94);Alphaproteobacteria{class}(94);Rhizobiales{order}(94);{family}(94);{genus}(94);Unassigned{species}(0)	Bacteria	Proteobacteria	Alphaproteobacteria	Rhizobiales			Unassigned
ASV1077	0	0	0	0	0	0	0	0	0	1	0	9	0	0	0	10	Bacteria{superkingdom}(100);Proteobacteria{phylum}(100);Betaproteobacteria{class}(100);Burkholderiales{order}(100);Oxalobacteraceae{family}(100);Noviherbaspirillum{genus}(100);Unassigned{species}(0)	Bacteria	Proteobacteria	Betaproteobacteria	Burkholderiales	Oxalobacteraceae	Noviherbaspirillum	Unassigned
ASV1078	53	0	32	58	52	74	41	80	43	21	60	55	0	0	68	637	Bacteria{superkingdom}(100);Acidobacteria{phylum}(100);Acidobacteria_Gp6{class}(100);{order}(100);{family}(100);Gp6{genus}(100);Unassigned{species}(0)	Bacteria	Acidobacteria	Acidobacteria_Gp6			Gp6	Unassigned
ASV1080	0	0	0	0	0	0	0	0	0	0	0	13	0	0	0	13	Bacteria{superkingdom}(100);Bacteroidetes{phylum}(100);Cytophagia{class}(100);Cytophagales{order}(100);Cytophagaceae{family}(100);Adhaeribacter{genus}(100);Unassigned{species}(0)	Bacteria	Bacteroidetes	Cytophagia	Cytophagales	Cytophagaceae	Adhaeribacter	Unassigned
ASV1082	0	13	19	0	0	21	18	0	75	0	29	0	9	0	0	184	Bacteria{superkingdom}(100);Acidobacteria{phylum}(100);Acidobacteria_Gp6{class}(100);{order}(100);{family}(100);Gp6{genus}(100);Unassigned{species}(0)	Bacteria	Acidobacteria	Acidobacteria_Gp6			Gp6	Unassigned
ASV1083	33	0	38	21	46	31	27	0	34	30	16	0	0	7	30	313	Bacteria{superkingdom}(100);Verrucomicrobia{phylum}(100);Verrucomicrobiae{class}(100);Verrucomicrobiales{order}(100);Verrucomicrobiaceae{family}(100);{genus}(100);uncultured_Haloferula_sp.{species}(100)	Bacteria	Verrucomicrobia	Verrucomicrobiae	Verrucomicrobiales	Verrucomicrobiaceae		uncultured_Haloferula_sp.
ASV1084	100	0	183	105	85	25	20	103	51	37	76	103	55	25	0	968	Bacteria{superkingdom}(100);Actinobacteria{phylum}(100);Actinobacteria{class}(100);Actinomycetales{order}(100);Nocardioidaceae{family}(100);Nocardioides{genus}(100);Unassigned{species}(0)	Bacteria	Actinobacteria	Actinobacteria	Actinomycetales	Nocardioidaceae	Nocardioides	Unassigned
ASV1085	0	0	8	0	31	0	0	0	18	0	0	0	0	0	0	57	Bacteria{superkingdom}(99);Bacteroidetes{phylum}(99);Sphingobacteriia{class}(99);Sphingobacteriales{order}(99);Chitinophagaceae{family}(99);Terrimonas{genus}(99);Unassigned{species}(0)	Bacteria	Bacteroidetes	Sphingobacteriia	Sphingobacteriales	Chitinophagaceae	Terrimonas	Unassigned
ASV1086	29	0	59	32	37	0	0	0	0	0	0	0	0	0	10	167	Bacteria{superkingdom}(100);Chloroflexi{phylum}(100);Caldilineae{class}(100);Caldilineales{order}(100);Caldilineaceae{family}(100);Litorilinea{genus}(100);uncultured_Litorilinea_sp.{species}(100)	Bacteria	Chloroflexi	Caldilineae	Caldilineales	Caldilineaceae	Litorilinea	uncultured_Litorilinea_sp.
ASV1087	0	0	0	0	5	0	0	0	0	0	0	0	0	0	0	5	Bacteria{superkingdom}(98);Cyanobacteria/Chloroplast{phylum}(98);Cyanobacteria{class}(98);{order}(98);{family}(98);{genus}(98);uncultured_Microcoleus_sp.{species}(98)	Bacteria	Cyanobacteria/Chloroplast	Cyanobacteria				uncultured_Microcoleus_sp.
ASV1088	59	0	73	59	0	0	0	22	48	0	0	0	0	0	31	292	Bacteria{superkingdom}(99);Actinobacteria{phylum}(99);Actinobacteria{class}(99);Actinomycetales{order}(99);Nocardioidaceae{family}(99);Nocardioides{genus}(99);Unassigned{species}(0)	Bacteria	Actinobacteria	Actinobacteria	Actinomycetales	Nocardioidaceae	Nocardioides	Unassigned
ASV1089	55	0	0	82	97	32	22	22	34	31	64	34	97	31	0	601	Bacteria{superkingdom}(100);Proteobacteria{phylum}(100);Alphaproteobacteria{class}(100);Rhizobiales{order}(100);Unassigned{family}(0);Unassigned{genus}(0);Unassigned{species}(0)	Bacteria	Proteobacteria	Alphaproteobacteria	Rhizobiales	Unassigned	Unassigned	Unassigned
ASV1090	0	0	0	0	0	0	0	0	0	0	61	94	80	115	98	448	Bacteria{superkingdom}(96);Proteobacteria{phylum}(96);Alphaproteobacteria{class}(96);Rhizobiales{order}(96);Xanthobacteraceae{family}(96);Pseudolabrys{genus}(96);Unassigned{species}(0)	Bacteria	Proteobacteria	Alphaproteobacteria	Rhizobiales	Xanthobacteraceae	Pseudolabrys	Unassigned
ASV1091	0	0	15	0	96	35	17	10	14	99	77	132	55	62	43	655	Bacteria{superkingdom}(96);Proteobacteria{phylum}(96);Alphaproteobacteria{class}(96);Rhizobiales{order}(96);Rhodobiaceae{family}(96);Rhodoligotrophos{genus}(96);uncultured_Rhizobiales_bacterium{species}(96)	Bacteria	Proteobacteria	Alphaproteobacteria	Rhizobiales	Rhodobiaceae	Rhodoligotrophos	uncultured_Rhizobiales_bacterium
ASV1092	20	131	22	0	0	0	0	0	18	0	0	0	0	0	0	191	Bacteria{superkingdom}(90);Actinobacteria{phylum}(90);Actinobacteria{class}(90);Actinomycetales{order}(90);Micrococcaceae{family}(90);Arthrobacter{genus}(90);Unassigned{species}(0)	Bacteria	Actinobacteria	Actinobacteria	Actinomycetales	Micrococcaceae	Arthrobacter	Unassigned
ASV1093	0	133	0	0	0	0	0	63	0	72	0	0	0	0	0	268	Bacteria{superkingdom}(99);Actinobacteria{phylum}(99);Actinobacteria{class}(99);Solirubrobacterales{order}(99);{family}(99);{genus}(99);Unassigned{species}(0)	Bacteria	Actinobacteria	Actinobacteria	Solirubrobacterales			Unassigned
ASV1094	0	0	0	0	0	0	0	0	0	37	0	80	0	185	15	317	Bacteria{superkingdom}(100);Chloroflexi{phylum}(100);Chloroflexia{class}(100);Kallotenuales{order}(100);Kallotenuaceae{family}(100);Kallotenue{genus}(100);Unassigned{species}(0)	Bacteria	Chloroflexi	Chloroflexia	Kallotenuales	Kallotenuaceae	Kallotenue	Unassigned
ASV1095	0	0	0	0	0	0	0	0	0	13	0	17	0	0	31	61	Bacteria{superkingdom}(100);Proteobacteria{phylum}(100);Gammaproteobacteria{class}(100);Xanthomonadales{order}(100);Sinobacteraceae{family}(100);Unassigned{genus}(0);Unassigned{species}(0)	Bacteria	Proteobacteria	Gammaproteobacteria	Xanthomonadales	Sinobacteraceae	Unassigned	Unassigned
ASV1096	0	0	0	0	0	0	49	46	0	0	0	0	0	0	0	95	Bacteria{superkingdom}(83);Actinobacteria{phylum}(83);Actinobacteria{class}(83);Acidimicrobiales{order}(83);Acidimicrobineae_incertae_sedis{family}(83);Aciditerrimonas{genus}(83);uncultured_Acidimicrobiales_bacterium{species}(83)	Bacteria	Actinobacteria	Actinobacteria	Acidimicrobiales	Acidimicrobineae_incertae_sedis	Aciditerrimonas	uncultured_Acidimicrobiales_bacterium
ASV1097	0	55	0	0	0	0	0	65	0	57	0	50	0	99	13	339	Bacteria{superkingdom}(100);Actinobacteria{phylum}(100);Actinobacteria{class}(100);Actinomycetales{order}(100);Pseudonocardiaceae{family}(100);Pseudonocardia{genus}(100);Unassigned{species}(0)	Bacteria	Actinobacteria	Actinobacteria	Actinomycetales	Pseudonocardiaceae	Pseudonocardia	Unassigned
ASV1098	0	0	0	0	0	0	0	45	0	0	0	0	0	0	0	45	Bacteria{superkingdom}(100);Acidobacteria{phylum}(100);Acidobacteria_Gp4{class}(100);{order}(100);{family}(100);Gp4{genus}(100);Unassigned{species}(0)	Bacteria	Acidobacteria	Acidobacteria_Gp4			Gp4	Unassigned
ASV1099	0	8	0	0	0	0	0	0	0	0	0	142	0	0	0	150	Bacteria{superkingdom}(97);Proteobacteria{phylum}(97);Alphaproteobacteria{class}(97);Sphingomonadales{order}(97);Sphingomonadaceae{family}(97);Sphingomonas{genus}(97);Unassigned{species}(0)	Bacteria	Proteobacteria	Alphaproteobacteria	Sphingomonadales	Sphingomonadaceae	Sphingomonas	Unassigned
ASV1100	24	44	0	32	20	16	25	23	74	23	50	26	23	0	27	407	Bacteria{superkingdom}(98);Actinobacteria{phylum}(98);Actinobacteria{class}(98);Acidimicrobiales{order}(98);{family}(98);{genus}(98);Unassigned{species}(0)	Bacteria	Actinobacteria	Actinobacteria	Acidimicrobiales			Unassigned
ASV1101	0	24	0	0	0	0	0	0	0	0	0	0	0	0	0	24	Bacteria{superkingdom}(91);Actinobacteria{phylum}(91);Actinobacteria{class}(91);Solirubrobacterales{order}(91);Unassigned{family}(0);Unassigned{genus}(0);Unassigned{species}(0)	Bacteria	Actinobacteria	Actinobacteria	Solirubrobacterales	Unassigned	Unassigned	Unassigned
ASV1102	21	0	0	0	0	109	29	18	0	29	0	0	0	0	78	284	Bacteria{superkingdom}(98);Planctomycetes{phylum}(98);Planctomycetia{class}(98);Planctomycetales{order}(98);Planctomycetaceae{family}(98);Pirellula{genus}(98);uncultured_Rhodopirellula_sp.{species}(98)	Bacteria	Planctomycetes	Planctomycetia	Planctomycetales	Planctomycetaceae	Pirellula	uncultured_Rhodopirellula_sp.
ASV1103	0	0	0	0	0	0	0	0	0	0	0	0	0	16	0	16	Bacteria{superkingdom}(100);Chloroflexi{phylum}(100);Thermomicrobia{class}(100);Sphaerobacterales{order}(100);Sphaerobacteraceae{family}(100);{genus}(100);uncultured_bacterium{species}(100)	Bacteria	Chloroflexi	Thermomicrobia	Sphaerobacterales	Sphaerobacteraceae		uncultured_bacterium
ASV1104	77	33	141	112	92	24	21	18	19	0	10	17	19	29	24	636	Bacteria{superkingdom}(100);Proteobacteria{phylum}(100);Alphaproteobacteria{class}(100);Caulobacterales{order}(100);Caulobacteraceae{family}(100);Unassigned{genus}(0);Unassigned{species}(0)	Bacteria	Proteobacteria	Alphaproteobacteria	Caulobacterales	Caulobacteraceae	Unassigned	Unassigned
ASV1105	74	0	62	31	121	0	0	0	0	50	30	23	0	0	19	410	Bacteria{superkingdom}(89);Proteobacteria{phylum}(89);Alphaproteobacteria{class}(89);Rhizobiales{order}(89);Hyphomicrobiaceae{family}(89);Devosia{genus}(89);Unassigned{species}(0)	Bacteria	Proteobacteria	Alphaproteobacteria	Rhizobiales	Hyphomicrobiaceae	Devosia	Unassigned
ASV1106	61	0	0	29	314	0	14	0	13	0	0	0	0	0	0	431	Bacteria{superkingdom}(100);Planctomycetes{phylum}(100);Planctomycetia{class}(100);Planctomycetales{order}(100);Planctomycetaceae{family}(100);Pirellula{genus}(100);Unassigned{species}(0)	Bacteria	Planctomycetes	Planctomycetia	Planctomycetales	Planctomycetaceae	Pirellula	Unassigned
ASV1107	0	0	0	0	0	0	0	0	0	68	0	170	51	42	0	331	Bacteria{superkingdom}(100);Actinobacteria{phylum}(100);Actinobacteria{class}(100);Actinomycetales{order}(100);Nocardioidaceae{family}(100);Nocardioides{genus}(100);Unassigned{species}(0)	Bacteria	Actinobacteria	Actinobacteria	Actinomycetales	Nocardioidaceae	Nocardioides	Unassigned
ASV1108	0	0	0	0	0	0	0	35	0	0	0	0	0	0	0	35	Bacteria{superkingdom}(94);Bacteroidetes{phylum}(94);Cytophagia{class}(94);Cytophagales{order}(94);{family}(94);Ohtaekwangia{genus}(94);uncultured_Sphingobacteriales_bacterium{species}(94)	Bacteria	Bacteroidetes	Cytophagia	Cytophagales		Ohtaekwangia	uncultured_Sphingobacteriales_bacterium
ASV1109	0	0	0	0	0	0	0	0	0	13	0	0	0	0	0	13	Bacteria{superkingdom}(100);Unassigned{phylum}(0);Unassigned{class}(0);Unassigned{order}(0);Unassigned{family}(0);Unassigned{genus}(0);Unassigned{species}(0)	Bacteria	Unassigned	Unassigned	Unassigned	Unassigned	Unassigned	Unassigned
ASV1112	0	0	0	0	115	34	0	0	0	0	0	0	0	0	0	149	Bacteria{superkingdom}(100);Planctomycetes{phylum}(100);Planctomycetia{class}(100);Planctomycetales{order}(100);Planctomycetaceae{family}(100);Unassigned{genus}(0);Unassigned{species}(0)	Bacteria	Planctomycetes	Planctomycetia	Planctomycetales	Planctomycetaceae	Unassigned	Unassigned
ASV1113	0	0	0	8	0	18	28	68	23	22	20	39	29	0	7	262	Bacteria{superkingdom}(100);Unassigned{phylum}(0);Unassigned{class}(0);Unassigned{order}(0);Unassigned{family}(0);Unassigned{genus}(0);Unassigned{species}(0)	Bacteria	Unassigned	Unassigned	Unassigned	Unassigned	Unassigned	Unassigned
ASV1114	0	0	0	0	0	0	0	87	0	38	0	34	0	0	0	159	Bacteria{superkingdom}(97);Actinobacteria{phylum}(97);Actinobacteria{class}(97);Actinomycetales{order}(97);Geodermatophilaceae{family}(97);Geodermatophilus{genus}(97);Unassigned{species}(0)	Bacteria	Actinobacteria	Actinobacteria	Actinomycetales	Geodermatophilaceae	Geodermatophilus	Unassigned
ASV1115	0	0	0	0	0	18	0	32	0	20	0	0	51	22	0	143	Bacteria{superkingdom}(100);Actinobacteria{phylum}(100);Actinobacteria{class}(100);Actinomycetales{order}(100);Micromonosporaceae{family}(100);Unassigned{genus}(0);Unassigned{species}(0)	Bacteria	Actinobacteria	Actinobacteria	Actinomycetales	Micromonosporaceae	Unassigned	Unassigned
ASV1117	0	0	0	16	0	107	43	110	46	50	0	66	0	0	18	456	Bacteria{superkingdom}(100);Actinobacteria{phylum}(100);Actinobacteria{class}(100);{order}(100);{family}(100);{genus}(100);uncultured_Frankia_sp.{species}(100)	Bacteria	Actinobacteria	Actinobacteria				uncultured_Frankia_sp.
ASV1118	0	0	0	0	0	0	0	0	0	0	0	19	0	0	0	19	Bacteria{superkingdom}(100);Actinobacteria{phylum}(100);Actinobacteria{class}(100);Actinomycetales{order}(100);Unassigned{family}(0);Unassigned{genus}(0);Unassigned{species}(0)	Bacteria	Actinobacteria	Actinobacteria	Actinomycetales	Unassigned	Unassigned	Unassigned
ASV1119	24	0	0	0	0	0	394	37	28	1471	26	131	0	0	53	2164	Bacteria{superkingdom}(100);Acidobacteria{phylum}(100);Acidobacteria_Gp4{class}(100);{order}(100);{family}(100);Gp4{genus}(100);Unassigned{species}(0)	Bacteria	Acidobacteria	Acidobacteria_Gp4			Gp4	Unassigned
ASV1120	0	0	0	0	0	0	0	0	0	0	0	14	0	36	0	50	Bacteria{superkingdom}(98);Chloroflexi{phylum}(98);Caldilineae{class}(98);Caldilineales{order}(98);Caldilineaceae{family}(98);Litorilinea{genus}(98);uncultured_bacterium{species}(98)	Bacteria	Chloroflexi	Caldilineae	Caldilineales	Caldilineaceae	Litorilinea	uncultured_bacterium
ASV1121	56	33	12	18	44	0	0	0	13	0	7	0	0	20	7	210	Bacteria{superkingdom}(99);Proteobacteria{phylum}(99);Deltaproteobacteria{class}(99);{order}(99);{family}(99);{genus}(99);uncultured_Acidobacteriales_bacterium{species}(99)	Bacteria	Proteobacteria	Deltaproteobacteria				uncultured_Acidobacteriales_bacterium
ASV1125	0	72	0	0	0	2	14	137	0	0	0	0	0	0	0	225	Bacteria{superkingdom}(97);Chloroflexi{phylum}(97);Chloroflexia{class}(97);{order}(97);{family}(97);{genus}(97);uncultured_bacterium{species}(97)	Bacteria	Chloroflexi	Chloroflexia				uncultured_bacterium
ASV1126	0	0	0	0	0	0	0	39	0	0	0	0	0	0	0	39	Bacteria{superkingdom}(100);{phylum}(100);{class}(100);{order}(100);{family}(100);{genus}(100);Unassigned{species}(0)	Bacteria						Unassigned
ASV1127	0	19	0	0	0	0	0	38	0	0	0	6	0	20	0	83	Bacteria{superkingdom}(100);Armatimonadetes{phylum}(100);{class}(100);{order}(100);{family}(100);Armatimonadetes_gp4{genus}(100);uncultured_bacterium{species}(100)	Bacteria	Armatimonadetes				Armatimonadetes_gp4	uncultured_bacterium
ASV1128	0	0	11	0	0	0	0	0	0	0	0	0	0	26	0	37	Bacteria{superkingdom}(100);{phylum}(100);{class}(100);{order}(100);{family}(100);{genus}(100);uncultured_Gemmatimonadetes_bacterium{species}(100)	Bacteria						uncultured_Gemmatimonadetes_bacterium
ASV1129	0	28	31	0	0	0	8	0	201	0	0	0	0	0	41	309	Bacteria{superkingdom}(99);{phylum}(99);{class}(99);{order}(99);{family}(99);{genus}(99);uncultured_Actinomyces_sp.{species}(99)	Bacteria						uncultured_Actinomyces_sp.
ASV1130	28	0	45	53	25	14	0	22	32	33	23	0	17	59	23	374	Bacteria{superkingdom}(91);Planctomycetes{phylum}(91);Planctomycetia{class}(91);Planctomycetales{order}(91);Planctomycetaceae{family}(91);Singulisphaera{genus}(91);uncultured_Planctomycetacia_bacterium{species}(91)	Bacteria	Planctomycetes	Planctomycetia	Planctomycetales	Planctomycetaceae	Singulisphaera	uncultured_Planctomycetacia_bacterium
ASV1131	173	27	0	0	376	0	0	0	0	0	0	0	19	0	0	595	Bacteria{superkingdom}(100);Bacteroidetes{phylum}(100);Sphingobacteriia{class}(100);Sphingobacteriales{order}(100);Chitinophagaceae{family}(100);Chitinophaga{genus}(100);Unassigned{species}(0)	Bacteria	Bacteroidetes	Sphingobacteriia	Sphingobacteriales	Chitinophagaceae	Chitinophaga	Unassigned
ASV1132	0	0	0	0	0	0	0	78	0	142	0	0	0	0	0	220	Bacteria{superkingdom}(100);Bacteroidetes{phylum}(100);Sphingobacteriia{class}(100);Sphingobacteriales{order}(100);Chitinophagaceae{family}(100);Segetibacter{genus}(100);Unassigned{species}(0)	Bacteria	Bacteroidetes	Sphingobacteriia	Sphingobacteriales	Chitinophagaceae	Segetibacter	Unassigned
ASV1133	0	0	0	0	0	0	0	53	0	99	97	64	273	141	245	972	Bacteria{superkingdom}(100);Proteobacteria{phylum}(100);Alphaproteobacteria{class}(100);Rhodobacterales{order}(100);Rhodobacteraceae{family}(100);Rubellimicrobium{genus}(100);Unassigned{species}(0)	Bacteria	Proteobacteria	Alphaproteobacteria	Rhodobacterales	Rhodobacteraceae	Rubellimicrobium	Unassigned
ASV1135	0	0	0	0	0	0	0	9	0	0	0	0	0	0	0	9	Bacteria{superkingdom}(93);Chloroflexi{phylum}(93);Chloroflexia{class}(93);Kallotenuales{order}(93);Kallotenuaceae{family}(93);Kallotenue{genus}(93);uncultured_bacterium{species}(93)	Bacteria	Chloroflexi	Chloroflexia	Kallotenuales	Kallotenuaceae	Kallotenue	uncultured_bacterium
ASV1137	0	7	0	0	0	0	0	0	0	146	0	0	0	0	0	153	Bacteria{superkingdom}(100);Proteobacteria{phylum}(100);Alphaproteobacteria{class}(100);Sphingomonadales{order}(100);Unassigned{family}(0);Unassigned{genus}(0);Unassigned{species}(0)	Bacteria	Proteobacteria	Alphaproteobacteria	Sphingomonadales	Unassigned	Unassigned	Unassigned
ASV1138	0	0	0	0	0	21	10	20	37	33	17	86	0	22	0	246	Bacteria{superkingdom}(82);Actinobacteria{phylum}(82);Actinobacteria{class}(82);Acidimicrobiales{order}(82);Acidimicrobineae_incertae_sedis{family}(82);Aciditerrimonas{genus}(82);uncultured_bacterium{species}(82)	Bacteria	Actinobacteria	Actinobacteria	Acidimicrobiales	Acidimicrobineae_incertae_sedis	Aciditerrimonas	uncultured_bacterium
ASV1140	0	0	0	0	0	0	0	0	0	0	0	0	5	2	0	7	Bacteria{superkingdom}(100);Bacteroidetes{phylum}(100);Sphingobacteriia{class}(100);Sphingobacteriales{order}(100);Chitinophagaceae{family}(100);Segetibacter{genus}(100);Unassigned{species}(0)	Bacteria	Bacteroidetes	Sphingobacteriia	Sphingobacteriales	Chitinophagaceae	Segetibacter	Unassigned
ASV1141	53	21	26	28	25	7	29	26	48	20	42	23	14	0	6	368	Bacteria{superkingdom}(100);Proteobacteria{phylum}(100);Alphaproteobacteria{class}(100);Rhizobiales{order}(100);Unassigned{family}(0);Unassigned{genus}(0);Unassigned{species}(0)	Bacteria	Proteobacteria	Alphaproteobacteria	Rhizobiales	Unassigned	Unassigned	Unassigned
ASV1142	113	0	81	0	0	362	136	0	131	144	0	0	0	41	126	1134	Bacteria{superkingdom}(97);Actinobacteria{phylum}(97);Actinobacteria{class}(97);{order}(97);{family}(97);{genus}(97);uncultured_Acidothermaceae_bacterium{species}(97)	Bacteria	Actinobacteria	Actinobacteria				uncultured_Acidothermaceae_bacterium
ASV1143	88	0	0	51	45	0	139	0	0	83	0	0	0	191	86	683	Bacteria{superkingdom}(92);Actinobacteria{phylum}(92);Actinobacteria{class}(92);Acidimicrobiales{order}(92);Acidimicrobineae_incertae_sedis{family}(92);Aciditerrimonas{genus}(92);uncultured_bacterium{species}(92)	Bacteria	Actinobacteria	Actinobacteria	Acidimicrobiales	Acidimicrobineae_incertae_sedis	Aciditerrimonas	uncultured_bacterium
ASV1144	0	0	0	35	0	42	0	16	31	39	0	0	37	0	0	200	Bacteria{superkingdom}(100);Bacteroidetes{phylum}(100);Sphingobacteriia{class}(100);Sphingobacteriales{order}(100);Chitinophagaceae{family}(100);Niastella{genus}(100);Unassigned{species}(0)	Bacteria	Bacteroidetes	Sphingobacteriia	Sphingobacteriales	Chitinophagaceae	Niastella	Unassigned
ASV1145	53	23	35	47	45	24	0	59	66	42	59	32	34	59	56	634	Bacteria{superkingdom}(83);Proteobacteria{phylum}(83);Alphaproteobacteria{class}(83);Rhizobiales{order}(83);Rhizobiales_incertae_sedis{family}(83);Vasilyevaea{genus}(83);uncultured_bacterium{species}(83)	Bacteria	Proteobacteria	Alphaproteobacteria	Rhizobiales	Rhizobiales_incertae_sedis	Vasilyevaea	uncultured_bacterium
ASV1146	0	0	20	386	58	23	25	20	0	0	21	0	0	0	0	553	Bacteria{superkingdom}(84);Proteobacteria{phylum}(84);Oligoflexia{class}(84);Oligoflexales{order}(84);Oligoflexaceae{family}(84);Oligoflexus{genus}(84);uncultured_bacterium{species}(84)	Bacteria	Proteobacteria	Oligoflexia	Oligoflexales	Oligoflexaceae	Oligoflexus	uncultured_bacterium
ASV1147	0	0	0	35	23	0	0	0	0	0	0	0	0	0	0	58	Bacteria{superkingdom}(100);Proteobacteria{phylum}(100);Gammaproteobacteria{class}(100);Xanthomonadales{order}(100);Xanthomonadaceae{family}(100);Pseudofulvimonas{genus}(100);Unassigned{species}(0)	Bacteria	Proteobacteria	Gammaproteobacteria	Xanthomonadales	Xanthomonadaceae	Pseudofulvimonas	Unassigned
ASV1148	68	0	42	46	52	44	41	43	62	41	0	0	34	0	0	473	Bacteria{superkingdom}(100);Proteobacteria{phylum}(100);Betaproteobacteria{class}(100);Burkholderiales{order}(100);Unassigned{family}(0);Unassigned{genus}(0);Unassigned{species}(0)	Bacteria	Proteobacteria	Betaproteobacteria	Burkholderiales	Unassigned	Unassigned	Unassigned
ASV1151	0	0	0	0	0	0	0	26	0	30	0	0	0	70	0	126	Bacteria{superkingdom}(100);Acidobacteria{phylum}(100);Acidobacteria_Gp3{class}(100);{order}(100);{family}(100);Unassigned{genus}(0);Unassigned{species}(0)	Bacteria	Acidobacteria	Acidobacteria_Gp3			Unassigned	Unassigned
ASV1152	0	25	0	0	0	0	0	0	0	0	0	0	0	0	0	25	Bacteria{superkingdom}(100);Proteobacteria{phylum}(100);Alphaproteobacteria{class}(100);Rhizobiales{order}(100);Phyllobacteriaceae{family}(100);Mesorhizobium{genus}(100);Unassigned{species}(0)	Bacteria	Proteobacteria	Alphaproteobacteria	Rhizobiales	Phyllobacteriaceae	Mesorhizobium	Unassigned
ASV1153	42	0	0	0	0	0	0	0	0	0	0	0	0	32	0	74	Bacteria{superkingdom}(93);Proteobacteria{phylum}(93);Deltaproteobacteria{class}(93);{order}(93);{family}(93);{genus}(93);uncultured_Acidobacteriales_bacterium{species}(93)	Bacteria	Proteobacteria	Deltaproteobacteria				uncultured_Acidobacteriales_bacterium
ASV1154	75	196	72	31	69	78	45	102	42	43	0	21	36	25	0	835	Bacteria{superkingdom}(100);Actinobacteria{phylum}(100);Actinobacteria{class}(100);Gaiellales{order}(100);Gaiellaceae{family}(100);Gaiella{genus}(100);Unassigned{species}(0)	Bacteria	Actinobacteria	Actinobacteria	Gaiellales	Gaiellaceae	Gaiella	Unassigned
ASV1155	86	0	77	67	22	0	0	0	0	43	47	48	0	0	90	480	Bacteria{superkingdom}(99);Actinobacteria{phylum}(99);Actinobacteria{class}(99);Actinomycetales{order}(99);Nocardioidaceae{family}(99);Aeromicrobium{genus}(99);Unassigned{species}(0)	Bacteria	Actinobacteria	Actinobacteria	Actinomycetales	Nocardioidaceae	Aeromicrobium	Unassigned
ASV1157	0	0	0	0	0	0	0	45	0	10	0	0	0	30	0	85	Bacteria{superkingdom}(100);Actinobacteria{phylum}(100);Actinobacteria{class}(100);Actinomycetales{order}(100);Micromonosporaceae{family}(100);Unassigned{genus}(0);Unassigned{species}(0)	Bacteria	Actinobacteria	Actinobacteria	Actinomycetales	Micromonosporaceae	Unassigned	Unassigned
ASV1158	0	0	0	0	0	0	0	0	0	55	0	67	0	51	0	173	Bacteria{superkingdom}(100);Planctomycetes{phylum}(100);Planctomycetia{class}(100);Planctomycetales{order}(100);Planctomycetaceae{family}(100);Unassigned{genus}(0);Unassigned{species}(0)	Bacteria	Planctomycetes	Planctomycetia	Planctomycetales	Planctomycetaceae	Unassigned	Unassigned
ASV1160	0	0	0	6	0	0	0	26	0	12	0	0	0	0	0	44	Bacteria{superkingdom}(94);Chloroflexi{phylum}(94);Unassigned{class}(0);Unassigned{order}(0);Unassigned{family}(0);Unassigned{genus}(0);Unassigned{species}(0)	Bacteria	Chloroflexi	Unassigned	Unassigned	Unassigned	Unassigned	Unassigned
ASV1161	24	0	29	35	110	0	0	0	0	0	0	0	0	0	0	198	Bacteria{superkingdom}(100);Proteobacteria{phylum}(100);Alphaproteobacteria{class}(100);Rhizobiales{order}(100);{family}(100);{genus}(100);Unassigned{species}(0)	Bacteria	Proteobacteria	Alphaproteobacteria	Rhizobiales			Unassigned
ASV1162	0	32	0	0	0	0	0	0	0	91	0	0	0	0	0	123	Bacteria{superkingdom}(98);Armatimonadetes{phylum}(98);Armatimonadia{class}(98);Armatimonadales{order}(98);Armatimonadaceae{family}(98);Armatimonas/Armatimonadetes_gp1{genus}(98);uncultured_bacterium{species}(98)	Bacteria	Armatimonadetes	Armatimonadia	Armatimonadales	Armatimonadaceae	Armatimonas/Armatimonadetes_gp1	uncultured_bacterium
ASV1163	0	10	0	0	0	0	33	100	28	37	0	9	0	0	32	249	Bacteria{superkingdom}(98);{phylum}(98);{class}(98);{order}(98);{family}(98);{genus}(98);uncultured_Gemmatimonas_sp.{species}(98)	Bacteria						uncultured_Gemmatimonas_sp.
ASV1164	0	62	0	0	26	0	0	58	63	47	89	0	163	0	101	609	Bacteria{superkingdom}(100);Proteobacteria{phylum}(100);Betaproteobacteria{class}(100);{order}(100);{family}(100);{genus}(100);Unassigned{species}(0)	Bacteria	Proteobacteria	Betaproteobacteria				Unassigned
ASV1165	0	11	0	0	0	0	0	1	0	2	0	0	7	0	0	21	Bacteria{superkingdom}(100);Armatimonadetes{phylum}(100);Armatimonadia{class}(100);Armatimonadales{order}(100);Armatimonadaceae{family}(100);Armatimonas/Armatimonadetes_gp1{genus}(100);Unassigned{species}(0)	Bacteria	Armatimonadetes	Armatimonadia	Armatimonadales	Armatimonadaceae	Armatimonas/Armatimonadetes_gp1	Unassigned
ASV1166	0	0	85	77	0	45	61	59	116	49	58	55	17	0	0	622	Bacteria{superkingdom}(98);Firmicutes{phylum}(98);Bacilli{class}(98);Bacillales{order}(98);Paenibacillaceae_1{family}(98);Paenibacillus{genus}(98);Unassigned{species}(0)	Bacteria	Firmicutes	Bacilli	Bacillales	Paenibacillaceae_1	Paenibacillus	Unassigned
ASV1168	41	0	0	34	0	0	15	11	14	0	0	141	0	18	52	326	Bacteria{superkingdom}(82);Acidobacteria{phylum}(82);Acidobacteria_Gp4{class}(82);{order}(82);{family}(82);Gp4{genus}(82);uncultured_Pelobacter_sp.{species}(82)	Bacteria	Acidobacteria	Acidobacteria_Gp4			Gp4	uncultured_Pelobacter_sp.
ASV1170	0	0	0	0	0	0	0	0	0	5	0	0	0	0	0	5	Bacteria{superkingdom}(100);Actinobacteria{phylum}(100);Actinobacteria{class}(100);Actinomycetales{order}(100);Unassigned{family}(0);Unassigned{genus}(0);Unassigned{species}(0)	Bacteria	Actinobacteria	Actinobacteria	Actinomycetales	Unassigned	Unassigned	Unassigned
ASV1171	59	0	39	44	46	0	0	0	13	0	58	0	0	0	0	259	Bacteria{superkingdom}(100);Planctomycetes{phylum}(100);Planctomycetia{class}(100);Planctomycetales{order}(100);Planctomycetaceae{family}(100);Singulisphaera{genus}(100);Unassigned{species}(0)	Bacteria	Planctomycetes	Planctomycetia	Planctomycetales	Planctomycetaceae	Singulisphaera	Unassigned
ASV1173	0	0	0	45	29	122	100	47	169	59	81	90	0	0	184	926	Bacteria{superkingdom}(94);Acidobacteria{phylum}(94);Acidobacteria_Gp3{class}(94);{order}(94);{family}(94);{genus}(94);uncultured_Candidatus_Solibacter_sp.{species}(94)	Bacteria	Acidobacteria	Acidobacteria_Gp3				uncultured_Candidatus_Solibacter_sp.
ASV1174	30	69	0	0	24	45	39	55	0	61	11	0	20	65	190	609	Bacteria{superkingdom}(98);Actinobacteria{phylum}(98);Actinobacteria{class}(98);Actinomycetales{order}(98);Micromonosporaceae{family}(98);Virgisporangium{genus}(98);uncultured_bacterium{species}(98)	Bacteria	Actinobacteria	Actinobacteria	Actinomycetales	Micromonosporaceae	Virgisporangium	uncultured_bacterium
ASV1175	0	0	0	0	0	0	0	0	0	0	0	0	74	41	0	115	Bacteria{superkingdom}(100);Proteobacteria{phylum}(100);Alphaproteobacteria{class}(100);Rhizobiales{order}(100);Unassigned{family}(0);Unassigned{genus}(0);Unassigned{species}(0)	Bacteria	Proteobacteria	Alphaproteobacteria	Rhizobiales	Unassigned	Unassigned	Unassigned
ASV1177	0	338	41	0	0	0	0	0	0	0	0	0	0	0	0	379	Bacteria{superkingdom}(84);Actinobacteria{phylum}(84);Actinobacteria{class}(84);Solirubrobacterales{order}(84);Unassigned{family}(0);Unassigned{genus}(0);Unassigned{species}(0)	Bacteria	Actinobacteria	Actinobacteria	Solirubrobacterales	Unassigned	Unassigned	Unassigned
ASV1178	0	0	0	39	0	81	72	84	0	369	0	118	0	0	97	860	Bacteria{superkingdom}(100);{phylum}(100);{class}(100);{order}(100);{family}(100);{genus}(100);uncultured_Actinomyces_sp.{species}(100)	Bacteria						uncultured_Actinomyces_sp.
ASV1179	24	0	0	122	0	215	39	131	186	153	468	64	0	0	93	1495	Bacteria{superkingdom}(100);Bacteroidetes{phylum}(100);Cytophagia{class}(100);Cytophagales{order}(100);{family}(100);Ohtaekwangia{genus}(100);Unassigned{species}(0)	Bacteria	Bacteroidetes	Cytophagia	Cytophagales		Ohtaekwangia	Unassigned
ASV1180	40	28	28	14	26	118	31	37	53	34	68	53	18	37	55	640	Bacteria{superkingdom}(94);Planctomycetes{phylum}(94);Planctomycetia{class}(94);Planctomycetales{order}(94);Planctomycetaceae{family}(94);Thermogutta{genus}(94);Unassigned{species}(0)	Bacteria	Planctomycetes	Planctomycetia	Planctomycetales	Planctomycetaceae	Thermogutta	Unassigned
ASV1182	194	0	302	60	75	0	0	0	0	0	0	0	0	0	0	631	Bacteria{superkingdom}(94);Firmicutes{phylum}(94);Bacilli{class}(94);Bacillales{order}(94);Bacillaceae_1{family}(94);Bacillus{genus}(94);Unassigned{species}(0)	Bacteria	Firmicutes	Bacilli	Bacillales	Bacillaceae_1	Bacillus	Unassigned
ASV1183	0	0	0	0	0	0	0	0	0	0	0	46	0	0	0	46	Bacteria{superkingdom}(100);Planctomycetes{phylum}(100);Planctomycetia{class}(100);Planctomycetales{order}(100);Planctomycetaceae{family}(100);Pirellula{genus}(100);Unassigned{species}(0)	Bacteria	Planctomycetes	Planctomycetia	Planctomycetales	Planctomycetaceae	Pirellula	Unassigned
ASV1184	0	0	0	23	0	32	31	0	180	0	572	25	21	0	67	951	Bacteria{superkingdom}(100);Chloroflexi{phylum}(100);{class}(100);{order}(100);{family}(100);{genus}(100);Unassigned{species}(0)	Bacteria	Chloroflexi					Unassigned
ASV1185	104	0	72	0	119	16	53	33	20	153	0	0	0	0	117	687	Bacteria{superkingdom}(100);Chloroflexi{phylum}(100);Chloroflexia{class}(100);Kallotenuales{order}(100);Kallotenuaceae{family}(100);Kallotenue{genus}(100);uncultured_bacterium{species}(100)	Bacteria	Chloroflexi	Chloroflexia	Kallotenuales	Kallotenuaceae	Kallotenue	uncultured_bacterium
ASV1186	25	0	64	0	31	0	0	0	0	0	0	0	0	0	0	120	Bacteria{superkingdom}(100);Armatimonadetes{phylum}(100);{class}(100);{order}(100);{family}(100);Armatimonadetes_gp4{genus}(100);Unassigned{species}(0)	Bacteria	Armatimonadetes				Armatimonadetes_gp4	Unassigned
ASV1187	3	34	0	0	0	0	0	46	0	0	0	0	0	13	0	96	Bacteria{superkingdom}(100);Actinobacteria{phylum}(100);Actinobacteria{class}(100);Actinomycetales{order}(100);Pseudonocardiaceae{family}(100);Pseudonocardia{genus}(100);Unassigned{species}(0)	Bacteria	Actinobacteria	Actinobacteria	Actinomycetales	Pseudonocardiaceae	Pseudonocardia	Unassigned
ASV1188	0	0	0	26	0	0	0	0	0	0	0	0	0	11	0	37	Bacteria{superkingdom}(100);Bacteroidetes{phylum}(100);Sphingobacteriia{class}(100);Sphingobacteriales{order}(100);Chitinophagaceae{family}(100);Unassigned{genus}(0);Unassigned{species}(0)	Bacteria	Bacteroidetes	Sphingobacteriia	Sphingobacteriales	Chitinophagaceae	Unassigned	Unassigned
ASV1189	0	9	0	0	0	0	0	0	0	0	0	0	0	0	0	9	Bacteria{superkingdom}(93);Proteobacteria{phylum}(93);Deltaproteobacteria{class}(93);{order}(93);{family}(93);{genus}(93);uncultured_Desulfuromonadales_bacterium{species}(93)	Bacteria	Proteobacteria	Deltaproteobacteria				uncultured_Desulfuromonadales_bacterium
ASV1190	0	0	0	0	101	0	0	0	0	0	0	0	0	0	0	101	Bacteria{superkingdom}(100);Proteobacteria{phylum}(100);Deltaproteobacteria{class}(100);{order}(100);{family}(100);{genus}(100);uncultured_Syntrophobacterales_bacterium{species}(100)	Bacteria	Proteobacteria	Deltaproteobacteria				uncultured_Syntrophobacterales_bacterium
ASV1193	39	0	93	80	0	0	0	47	50	0	337	0	26	0	0	672	Bacteria{superkingdom}(98);Chloroflexi{phylum}(98);Chloroflexia{class}(98);Kallotenuales{order}(98);Kallotenuaceae{family}(98);Kallotenue{genus}(98);uncultured_bacterium{species}(98)	Bacteria	Chloroflexi	Chloroflexia	Kallotenuales	Kallotenuaceae	Kallotenue	uncultured_bacterium
ASV1194	16	33	17	0	0	0	0	0	0	11	0	0	0	0	0	77	Bacteria{superkingdom}(100);Actinobacteria{phylum}(100);Actinobacteria{class}(100);Rubrobacterales{order}(100);Rubrobacteraceae{family}(100);Rubrobacter{genus}(100);Unassigned{species}(0)	Bacteria	Actinobacteria	Actinobacteria	Rubrobacterales	Rubrobacteraceae	Rubrobacter	Unassigned
ASV1195	41	18	18	24	41	19	39	46	30	20	0	0	0	0	0	296	Bacteria{superkingdom}(100);Actinobacteria{phylum}(100);Actinobacteria{class}(100);Actinomycetales{order}(100);Micromonosporaceae{family}(100);Unassigned{genus}(0);Unassigned{species}(0)	Bacteria	Actinobacteria	Actinobacteria	Actinomycetales	Micromonosporaceae	Unassigned	Unassigned
ASV1196	0	0	0	0	0	0	19	17	0	0	0	0	0	0	0	36	Bacteria{superkingdom}(94);Armatimonadetes{phylum}(94);{class}(94);{order}(94);{family}(94);Armatimonadetes_gp4{genus}(94);uncultured_bacterium{species}(94)	Bacteria	Armatimonadetes				Armatimonadetes_gp4	uncultured_bacterium
ASV1197	10	0	0	0	0	0	0	40	19	0	0	0	0	0	0	69	Bacteria{superkingdom}(83);Actinobacteria{phylum}(83);Actinobacteria{class}(83);Solirubrobacterales{order}(83);Solirubrobacteraceae{family}(83);Solirubrobacter{genus}(83);Unassigned{species}(0)	Bacteria	Actinobacteria	Actinobacteria	Solirubrobacterales	Solirubrobacteraceae	Solirubrobacter	Unassigned
ASV1198	0	66	20	46	0	0	0	52	31	61	0	36	212	0	42	566	Bacteria{superkingdom}(100);Proteobacteria{phylum}(100);Alphaproteobacteria{class}(100);Alphaproteobacteria_incertae_sedis{order}(100);{family}(100);Geminicoccus{genus}(100);Unassigned{species}(0)	Bacteria	Proteobacteria	Alphaproteobacteria	Alphaproteobacteria_incertae_sedis		Geminicoccus	Unassigned
ASV1199	28	40	171	33	72	35	16	11	69	28	6	0	34	5	25	573	Bacteria{superkingdom}(98);Chloroflexi{phylum}(98);Chloroflexia{class}(98);Kallotenuales{order}(98);Kallotenuaceae{family}(98);Kallotenue{genus}(98);uncultured_bacterium{species}(98)	Bacteria	Chloroflexi	Chloroflexia	Kallotenuales	Kallotenuaceae	Kallotenue	uncultured_bacterium
ASV1200	86	36	122	0	97	0	0	0	31	0	27	25	36	25	34	519	Bacteria{superkingdom}(100);Bacteroidetes{phylum}(100);Sphingobacteriia{class}(100);Sphingobacteriales{order}(100);Sphingobacteriaceae{family}(100);Pedobacter{genus}(100);Unassigned{species}(0)	Bacteria	Bacteroidetes	Sphingobacteriia	Sphingobacteriales	Sphingobacteriaceae	Pedobacter	Unassigned
ASV1201	0	0	0	0	0	0	65	65	0	151	0	24	0	0	0	305	Bacteria{superkingdom}(96);Chloroflexi{phylum}(96);Anaerolineae{class}(96);Anaerolineales{order}(96);Anaerolineaceae{family}(96);{genus}(96);uncultured_soil_bacterium{species}(96)	Bacteria	Chloroflexi	Anaerolineae	Anaerolineales	Anaerolineaceae		uncultured_soil_bacterium
ASV1202	0	0	0	0	0	103	76	94	52	143	27	43	0	32	49	619	Bacteria{superkingdom}(82);Actinobacteria{phylum}(82);Actinobacteria{class}(82);{order}(82);{family}(82);{genus}(82);uncultured_Frankia_sp.{species}(82)	Bacteria	Actinobacteria	Actinobacteria				uncultured_Frankia_sp.
ASV1203	23	0	102	77	51	0	20	8	20	0	12	0	0	0	0	313	Bacteria{superkingdom}(95);Proteobacteria{phylum}(95);Alphaproteobacteria{class}(95);Sphingomonadales{order}(95);Sphingomonadaceae{family}(95);Sphingomonas{genus}(95);Sphingomonas_koreensis{species}(95)	Bacteria	Proteobacteria	Alphaproteobacteria	Sphingomonadales	Sphingomonadaceae	Sphingomonas	Sphingomonas_koreensis
ASV1204	61	0	24	30	18	9	54	20	0	29	0	0	0	0	0	245	Bacteria{superkingdom}(100);Actinobacteria{phylum}(100);Actinobacteria{class}(100);Unassigned{order}(0);Unassigned{family}(0);Unassigned{genus}(0);Unassigned{species}(0)	Bacteria	Actinobacteria	Actinobacteria	Unassigned	Unassigned	Unassigned	Unassigned
ASV1205	0	0	0	13	0	0	0	16	0	0	0	0	0	0	0	29	Bacteria{superkingdom}(99);Actinobacteria{phylum}(99);Actinobacteria{class}(99);Actinomycetales{order}(99);Pseudonocardiaceae{family}(99);Kibdelosporangium{genus}(99);Unassigned{species}(0)	Bacteria	Actinobacteria	Actinobacteria	Actinomycetales	Pseudonocardiaceae	Kibdelosporangium	Unassigned
ASV1206	12	0	43	0	32	9	0	0	0	97	0	18	26	30	0	267	Bacteria{superkingdom}(99);Actinobacteria{phylum}(99);Actinobacteria{class}(99);Actinomycetales{order}(99);Nocardioidaceae{family}(99);Marmoricola{genus}(99);Unassigned{species}(0)	Bacteria	Actinobacteria	Actinobacteria	Actinomycetales	Nocardioidaceae	Marmoricola	Unassigned
ASV1207	75	0	34	0	0	0	0	0	0	43	0	0	0	0	0	152	Bacteria{superkingdom}(91);Proteobacteria{phylum}(91);Betaproteobacteria{class}(91);{order}(91);{family}(91);{genus}(91);uncultured_Alcaligenaceae_bacterium{species}(91)	Bacteria	Proteobacteria	Betaproteobacteria				uncultured_Alcaligenaceae_bacterium
ASV1208	0	15	20	49	49	12	0	0	0	24	0	25	24	44	14	276	Bacteria{superkingdom}(100);Proteobacteria{phylum}(100);Alphaproteobacteria{class}(100);Caulobacterales{order}(100);Caulobacteraceae{family}(100);Brevundimonas{genus}(100);Unassigned{species}(0)	Bacteria	Proteobacteria	Alphaproteobacteria	Caulobacterales	Caulobacteraceae	Brevundimonas	Unassigned
ASV1209	0	0	0	0	0	0	0	0	0	18	0	0	0	0	0	18	Bacteria{superkingdom}(98);Proteobacteria{phylum}(98);Alphaproteobacteria{class}(98);Rhizobiales{order}(98);{family}(98);{genus}(98);uncultured_endolithic_bacterium{species}(98)	Bacteria	Proteobacteria	Alphaproteobacteria	Rhizobiales			uncultured_endolithic_bacterium
ASV1210	26	0	50	56	26	99	0	0	25	25	112	76	44	32	46	617	Bacteria{superkingdom}(88);Chloroflexi{phylum}(88);{class}(88);{order}(88);{family}(88);{genus}(88);Unassigned{species}(0)	Bacteria	Chloroflexi					Unassigned
ASV1211	37	0	63	0	0	0	0	0	153	0	0	0	0	0	19	272	Bacteria{superkingdom}(100);Planctomycetes{phylum}(100);Planctomycetia{class}(100);Planctomycetales{order}(100);Planctomycetaceae{family}(100);Unassigned{genus}(0);Unassigned{species}(0)	Bacteria	Planctomycetes	Planctomycetia	Planctomycetales	Planctomycetaceae	Unassigned	Unassigned
ASV1212	10	0	0	0	0	133	69	11	0	0	0	0	0	0	0	223	Bacteria{superkingdom}(100);Chloroflexi{phylum}(100);Unassigned{class}(0);Unassigned{order}(0);Unassigned{family}(0);Unassigned{genus}(0);Unassigned{species}(0)	Bacteria	Chloroflexi	Unassigned	Unassigned	Unassigned	Unassigned	Unassigned
ASV1215	0	0	0	0	38	18	0	51	8	40	100	0	0	100	113	468	Bacteria{superkingdom}(91);Armatimonadetes{phylum}(91);{class}(91);{order}(91);{family}(91);Armatimonadetes_gp4{genus}(91);uncultured_actinobacterium{species}(91)	Bacteria	Armatimonadetes				Armatimonadetes_gp4	uncultured_actinobacterium
ASV1216	0	0	0	0	0	0	0	0	0	12	0	0	0	0	0	12	Bacteria{superkingdom}(99);Armatimonadetes{phylum}(99);{class}(99);{order}(99);{family}(99);Armatimonadetes_gp4{genus}(99);uncultured_bacterium{species}(99)	Bacteria	Armatimonadetes				Armatimonadetes_gp4	uncultured_bacterium
ASV1217	0	0	0	0	0	0	0	0	0	0	0	53	0	0	0	53	Bacteria{superkingdom}(100);Actinobacteria{phylum}(100);Actinobacteria{class}(100);Actinomycetales{order}(100);Nocardioidaceae{family}(100);Nocardioides{genus}(100);Unassigned{species}(0)	Bacteria	Actinobacteria	Actinobacteria	Actinomycetales	Nocardioidaceae	Nocardioides	Unassigned
ASV1219	16	0	0	0	0	0	0	0	127	0	0	0	0	0	0	143	Bacteria{superkingdom}(100);Proteobacteria{phylum}(100);Betaproteobacteria{class}(100);{order}(100);{family}(100);{genus}(100);Unassigned{species}(0)	Bacteria	Proteobacteria	Betaproteobacteria				Unassigned
ASV1220	0	0	44	0	0	0	0	0	0	0	0	0	0	0	0	44	Bacteria{superkingdom}(100);Actinobacteria{phylum}(100);Actinobacteria{class}(100);Actinomycetales{order}(100);Unassigned{family}(0);Unassigned{genus}(0);Unassigned{species}(0)	Bacteria	Actinobacteria	Actinobacteria	Actinomycetales	Unassigned	Unassigned	Unassigned
ASV1221	0	0	0	0	0	54	37	75	134	25	103	70	155	60	50	763	Bacteria{superkingdom}(100);Chloroflexi{phylum}(100);Chloroflexia{class}(100);{order}(100);{family}(100);{genus}(100);uncultured_bacterium{species}(100)	Bacteria	Chloroflexi	Chloroflexia				uncultured_bacterium
ASV1222	152	36	95	0	65	0	20	0	0	0	0	0	0	0	0	368	Bacteria{superkingdom}(84);Bacteroidetes{phylum}(84);Sphingobacteriia{class}(84);Sphingobacteriales{order}(84);Chitinophagaceae{family}(84);Cnuella{genus}(84);uncultured_Chitinophaga_sp.{species}(84)	Bacteria	Bacteroidetes	Sphingobacteriia	Sphingobacteriales	Chitinophagaceae	Cnuella	uncultured_Chitinophaga_sp.
ASV1223	0	40	22	0	0	31	135	120	0	57	19	464	254	61	70	1273	Bacteria{superkingdom}(100);Bacteroidetes{phylum}(100);Sphingobacteriia{class}(100);Sphingobacteriales{order}(100);Chitinophagaceae{family}(100);Unassigned{genus}(0);Unassigned{species}(0)	Bacteria	Bacteroidetes	Sphingobacteriia	Sphingobacteriales	Chitinophagaceae	Unassigned	Unassigned
ASV1224	0	13	0	0	0	0	19	14	0	0	0	0	0	0	0	46	Bacteria{superkingdom}(98);Proteobacteria{phylum}(98);Alphaproteobacteria{class}(98);Rhodospirillales{order}(98);{family}(98);{genus}(98);Unassigned{species}(0)	Bacteria	Proteobacteria	Alphaproteobacteria	Rhodospirillales			Unassigned
ASV1225	0	0	0	0	0	0	31	45	8	0	0	0	0	0	0	84	Bacteria{superkingdom}(100);Acidobacteria{phylum}(100);Acidobacteria_Gp7{class}(100);{order}(100);{family}(100);Gp7{genus}(100);Unassigned{species}(0)	Bacteria	Acidobacteria	Acidobacteria_Gp7			Gp7	Unassigned
ASV1226	0	0	0	0	0	0	0	85	0	0	0	0	0	0	0	85	Bacteria{superkingdom}(93);Acidobacteria{phylum}(93);Acidobacteria_Gp4{class}(93);{order}(93);{family}(93);Gp4{genus}(93);uncultured_Rhodopseudomonas_sp.{species}(93)	Bacteria	Acidobacteria	Acidobacteria_Gp4			Gp4	uncultured_Rhodopseudomonas_sp.
ASV1228	0	7	0	0	0	0	0	12	0	0	0	0	0	0	0	19	Bacteria{superkingdom}(99);Proteobacteria{phylum}(99);Betaproteobacteria{class}(99);Burkholderiales{order}(99);{family}(99);{genus}(99);Unassigned{species}(0)	Bacteria	Proteobacteria	Betaproteobacteria	Burkholderiales			Unassigned
ASV1229	0	17	0	0	9	0	0	10	21	0	0	0	0	11	0	68	Bacteria{superkingdom}(99);Proteobacteria{phylum}(99);Alphaproteobacteria{class}(99);Rhodospirillales{order}(99);{family}(99);{genus}(99);Unassigned{species}(0)	Bacteria	Proteobacteria	Alphaproteobacteria	Rhodospirillales			Unassigned
ASV1230	0	83	12	0	0	0	0	0	0	0	0	0	0	0	0	95	Bacteria{superkingdom}(96);Actinobacteria{phylum}(96);Actinobacteria{class}(96);Actinomycetales{order}(96);Pseudonocardiaceae{family}(96);Amycolatopsis{genus}(96);Unassigned{species}(0)	Bacteria	Actinobacteria	Actinobacteria	Actinomycetales	Pseudonocardiaceae	Amycolatopsis	Unassigned
ASV1231	239	26	48	0	0	0	0	0	0	0	0	0	0	0	0	313	Bacteria{superkingdom}(100);Bacteroidetes{phylum}(100);Sphingobacteriia{class}(100);Sphingobacteriales{order}(100);Chitinophagaceae{family}(100);Chitinophaga{genus}(100);Unassigned{species}(0)	Bacteria	Bacteroidetes	Sphingobacteriia	Sphingobacteriales	Chitinophagaceae	Chitinophaga	Unassigned
ASV1233	25	0	0	32	21	17	0	28	0	18	0	0	16	0	0	157	Bacteria{superkingdom}(100);Planctomycetes{phylum}(100);Planctomycetia{class}(100);Planctomycetales{order}(100);Planctomycetaceae{family}(100);{genus}(100);uncultured_Pasteuria_sp.{species}(100)	Bacteria	Planctomycetes	Planctomycetia	Planctomycetales	Planctomycetaceae		uncultured_Pasteuria_sp.
ASV1235	16	0	0	0	0	11	9	24	0	0	0	0	0	0	0	60	Bacteria{superkingdom}(100);Actinobacteria{phylum}(100);Actinobacteria{class}(100);Gaiellales{order}(100);Gaiellaceae{family}(100);Gaiella{genus}(100);Unassigned{species}(0)	Bacteria	Actinobacteria	Actinobacteria	Gaiellales	Gaiellaceae	Gaiella	Unassigned
ASV1237	0	0	0	0	0	0	0	0	0	0	0	281	0	0	0	281	Bacteria{superkingdom}(100);Proteobacteria{phylum}(100);Deltaproteobacteria{class}(100);Myxococcales{order}(100);Cystobacteraceae{family}(100);Cystobacter{genus}(100);Unassigned{species}(0)	Bacteria	Proteobacteria	Deltaproteobacteria	Myxococcales	Cystobacteraceae	Cystobacter	Unassigned
ASV1238	0	19	0	0	0	0	0	0	0	0	0	0	0	0	0	19	Bacteria{superkingdom}(100);Actinobacteria{phylum}(100);Actinobacteria{class}(100);Actinomycetales{order}(100);Propionibacteriaceae{family}(100);Unassigned{genus}(0);Unassigned{species}(0)	Bacteria	Actinobacteria	Actinobacteria	Actinomycetales	Propionibacteriaceae	Unassigned	Unassigned
ASV1239	0	0	0	0	0	0	0	50	0	0	0	151	0	0	0	201	Bacteria{superkingdom}(100);Proteobacteria{phylum}(100);Deltaproteobacteria{class}(100);Myxococcales{order}(100);Unassigned{family}(0);Unassigned{genus}(0);Unassigned{species}(0)	Bacteria	Proteobacteria	Deltaproteobacteria	Myxococcales	Unassigned	Unassigned	Unassigned
ASV1243	0	0	0	47	27	0	0	0	0	0	0	0	0	0	0	74	Bacteria{superkingdom}(100);Planctomycetes{phylum}(100);Planctomycetia{class}(100);Planctomycetales{order}(100);Planctomycetaceae{family}(100);{genus}(100);uncultured_Pasteuria_sp.{species}(100)	Bacteria	Planctomycetes	Planctomycetia	Planctomycetales	Planctomycetaceae		uncultured_Pasteuria_sp.
ASV1244	0	0	0	0	0	0	32	0	0	0	0	49	0	0	0	81	Bacteria{superkingdom}(100);Actinobacteria{phylum}(100);Actinobacteria{class}(100);Actinomycetales{order}(100);Nocardioidaceae{family}(100);Nocardioides{genus}(100);Unassigned{species}(0)	Bacteria	Actinobacteria	Actinobacteria	Actinomycetales	Nocardioidaceae	Nocardioides	Unassigned
ASV1245	0	32	0	0	0	14	0	0	23	30	0	91	136	42	87	455	Bacteria{superkingdom}(92);{phylum}(92);{class}(92);{order}(92);{family}(92);{genus}(92);uncultured_Gemmatimonadetes_bacterium{species}(92)	Bacteria						uncultured_Gemmatimonadetes_bacterium
ASV1247	13	0	26	19	12	0	0	0	0	0	0	28	28	0	0	126	Bacteria{superkingdom}(85);Actinobacteria{phylum}(85);Actinobacteria{class}(85);Actinomycetales{order}(85);Microbacteriaceae{family}(85);Lysinimonas{genus}(85);uncultured_Microbacteriaceae_bacterium{species}(85)	Bacteria	Actinobacteria	Actinobacteria	Actinomycetales	Microbacteriaceae	Lysinimonas	uncultured_Microbacteriaceae_bacterium
ASV1248	0	98	0	0	0	0	0	0	0	0	0	0	0	1	0	99	Bacteria{superkingdom}(96);Actinobacteria{phylum}(96);Actinobacteria{class}(96);Actinomycetales{order}(96);Pseudonocardiaceae{family}(96);Lentzea{genus}(96);Unassigned{species}(0)	Bacteria	Actinobacteria	Actinobacteria	Actinomycetales	Pseudonocardiaceae	Lentzea	Unassigned
ASV1249	15	34	44	0	27	30	41	33	46	50	0	0	0	0	0	320	Bacteria{superkingdom}(92);Proteobacteria{phylum}(92);Betaproteobacteria{class}(92);{order}(92);{family}(92);{genus}(92);uncultured_Alcaligenaceae_bacterium{species}(92)	Bacteria	Proteobacteria	Betaproteobacteria				uncultured_Alcaligenaceae_bacterium
ASV1250	32	0	9	0	0	0	0	0	0	0	0	0	0	0	0	41	Bacteria{superkingdom}(84);candidate_division_WPS-1{phylum}(84);{class}(84);{order}(84);{family}(84);WPS-1_genera_incertae_sedis{genus}(84);uncultured_bacterium{species}(84)	Bacteria	candidate_division_WPS-1				WPS-1_genera_incertae_sedis	uncultured_bacterium
ASV1251	0	0	0	0	0	0	3611	0	0	0	0	0	0	0	0	3611	Bacteria{superkingdom}(82);Acidobacteria{phylum}(82);Acidobacteria_Gp4{class}(82);{order}(82);{family}(82);Gp4{genus}(82);uncultured_soil_bacterium{species}(82)	Bacteria	Acidobacteria	Acidobacteria_Gp4			Gp4	uncultured_soil_bacterium
ASV1252	0	47	0	0	0	0	119	57	0	40	0	0	0	8	0	271	Bacteria{superkingdom}(92);Proteobacteria{phylum}(92);Alphaproteobacteria{class}(92);Sphingomonadales{order}(92);Sphingomonadaceae{family}(92);Sphingosinicella{genus}(92);Unassigned{species}(0)	Bacteria	Proteobacteria	Alphaproteobacteria	Sphingomonadales	Sphingomonadaceae	Sphingosinicella	Unassigned
ASV1253	160	0	0	0	0	0	0	0	0	0	0	0	0	0	18	178	Bacteria{superkingdom}(100);Bacteroidetes{phylum}(100);Sphingobacteriia{class}(100);Sphingobacteriales{order}(100);Chitinophagaceae{family}(100);Unassigned{genus}(0);Unassigned{species}(0)	Bacteria	Bacteroidetes	Sphingobacteriia	Sphingobacteriales	Chitinophagaceae	Unassigned	Unassigned
ASV1254	0	0	0	24	0	0	35	0	0	0	0	0	0	0	0	59	Bacteria{superkingdom}(98);Bacteroidetes{phylum}(98);Sphingobacteriia{class}(98);Sphingobacteriales{order}(98);Chitinophagaceae{family}(98);Niastella{genus}(98);Unassigned{species}(0)	Bacteria	Bacteroidetes	Sphingobacteriia	Sphingobacteriales	Chitinophagaceae	Niastella	Unassigned
ASV1255	28	85	33	0	38	13	0	82	16	0	0	0	0	0	43	338	Bacteria{superkingdom}(87);{phylum}(87);{class}(87);{order}(87);{family}(87);{genus}(87);Unassigned{species}(0)	Bacteria						Unassigned
ASV1256	29	47	28	24	0	0	26	23	0	0	0	0	0	0	0	177	Bacteria{superkingdom}(100);Actinobacteria{phylum}(100);Actinobacteria{class}(100);Solirubrobacterales{order}(100);Unassigned{family}(0);Unassigned{genus}(0);Unassigned{species}(0)	Bacteria	Actinobacteria	Actinobacteria	Solirubrobacterales	Unassigned	Unassigned	Unassigned
ASV1257	0	0	0	8	0	0	0	0	12	0	0	35	5	8	0	68	Bacteria{superkingdom}(100);Deinococcus-Thermus{phylum}(100);Deinococci{class}(100);Deinococcales{order}(100);Trueperaceae{family}(100);Truepera{genus}(100);Unassigned{species}(0)	Bacteria	Deinococcus-Thermus	Deinococci	Deinococcales	Trueperaceae	Truepera	Unassigned
ASV1258	0	0	0	0	0	26	15	14	0	16	0	0	20	0	21	112	Bacteria{superkingdom}(95);Actinobacteria{phylum}(95);Actinobacteria{class}(95);Actinomycetales{order}(95);Sporichthyaceae{family}(95);Sporichthya{genus}(95);uncultured_actinobacterium{species}(95)	Bacteria	Actinobacteria	Actinobacteria	Actinomycetales	Sporichthyaceae	Sporichthya	uncultured_actinobacterium
ASV1260	0	0	0	0	0	0	0	0	186	0	0	0	47	0	20	253	Bacteria{superkingdom}(89);Actinobacteria{phylum}(89);Actinobacteria{class}(89);Solirubrobacterales{order}(89);{family}(89);{genus}(89);Unassigned{species}(0)	Bacteria	Actinobacteria	Actinobacteria	Solirubrobacterales			Unassigned
ASV1261	17	0	19	0	23	0	0	0	0	0	26	0	0	0	0	85	Bacteria{superkingdom}(97);Planctomycetes{phylum}(97);Planctomycetia{class}(97);Planctomycetales{order}(97);Planctomycetaceae{family}(97);{genus}(97);uncultured_Planctomyces_sp.{species}(97)	Bacteria	Planctomycetes	Planctomycetia	Planctomycetales	Planctomycetaceae		uncultured_Planctomyces_sp.
ASV1262	21	65	28	0	0	0	0	37	0	34	0	0	0	0	0	185	Bacteria{superkingdom}(100);Gemmatimonadetes{phylum}(100);Gemmatimonadetes{class}(100);Gemmatimonadales{order}(100);Gemmatimonadaceae{family}(100);Gemmatimonas{genus}(100);Unassigned{species}(0)	Bacteria	Gemmatimonadetes	Gemmatimonadetes	Gemmatimonadales	Gemmatimonadaceae	Gemmatimonas	Unassigned
ASV1263	0	0	0	0	0	0	159	51	76	72	0	0	0	0	0	358	Bacteria{superkingdom}(100);Acidobacteria{phylum}(100);Acidobacteria_Gp6{class}(100);{order}(100);{family}(100);Gp6{genus}(100);Unassigned{species}(0)	Bacteria	Acidobacteria	Acidobacteria_Gp6			Gp6	Unassigned
ASV1264	0	0	0	38	0	12	11	15	16	50	0	0	27	0	0	169	Bacteria{superkingdom}(99);Acidobacteria{phylum}(99);Acidobacteria_Gp6{class}(99);{order}(99);{family}(99);Gp6{genus}(99);Unassigned{species}(0)	Bacteria	Acidobacteria	Acidobacteria_Gp6			Gp6	Unassigned
ASV1265	19	289	46	0	36	0	0	0	0	20	0	0	0	0	0	410	Bacteria{superkingdom}(100);Verrucomicrobia{phylum}(100);Opitutae{class}(100);Opitutales{order}(100);Opitutaceae{family}(100);Opitutus{genus}(100);Unassigned{species}(0)	Bacteria	Verrucomicrobia	Opitutae	Opitutales	Opitutaceae	Opitutus	Unassigned
ASV1266	0	61	0	0	0	0	0	0	0	0	0	0	0	0	0	61	Bacteria{superkingdom}(100);Planctomycetes{phylum}(100);Planctomycetia{class}(100);Planctomycetales{order}(100);Planctomycetaceae{family}(100);Pirellula{genus}(100);Unassigned{species}(0)	Bacteria	Planctomycetes	Planctomycetia	Planctomycetales	Planctomycetaceae	Pirellula	Unassigned
ASV1267	0	0	0	0	0	0	0	3	0	0	0	0	5	0	0	8	Bacteria{superkingdom}(100);Chloroflexi{phylum}(100);Chloroflexia{class}(100);Kallotenuales{order}(100);Kallotenuaceae{family}(100);Kallotenue{genus}(100);uncultured_bacterium{species}(100)	Bacteria	Chloroflexi	Chloroflexia	Kallotenuales	Kallotenuaceae	Kallotenue	uncultured_bacterium
ASV1268	0	0	0	15	0	0	0	0	0	0	0	0	0	0	0	15	Bacteria{superkingdom}(99);Actinobacteria{phylum}(99);Actinobacteria{class}(99);Solirubrobacterales{order}(99);Conexibacteraceae{family}(99);Conexibacter{genus}(99);Unassigned{species}(0)	Bacteria	Actinobacteria	Actinobacteria	Solirubrobacterales	Conexibacteraceae	Conexibacter	Unassigned
ASV1269	0	18	0	0	0	14	0	4	119	0	0	0	26	0	55	236	Bacteria{superkingdom}(88);Proteobacteria{phylum}(88);Gammaproteobacteria{class}(88);Chromatiales{order}(88);{family}(88);{genus}(88);uncultured_bacterium{species}(88)	Bacteria	Proteobacteria	Gammaproteobacteria	Chromatiales			uncultured_bacterium
ASV1273	0	0	0	22	0	0	0	46	106	68	37	72	122	33	71	577	Bacteria{superkingdom}(100);Proteobacteria{phylum}(100);Alphaproteobacteria{class}(100);Rhizobiales{order}(100);Unassigned{family}(0);Unassigned{genus}(0);Unassigned{species}(0)	Bacteria	Proteobacteria	Alphaproteobacteria	Rhizobiales	Unassigned	Unassigned	Unassigned
ASV1274	0	0	0	0	0	0	27	0	0	78	0	0	0	0	0	105	Bacteria{superkingdom}(99);Actinobacteria{phylum}(99);Actinobacteria{class}(99);Acidimicrobiales{order}(99);Acidimicrobineae_incertae_sedis{family}(99);Aciditerrimonas{genus}(99);Unassigned{species}(0)	Bacteria	Actinobacteria	Actinobacteria	Acidimicrobiales	Acidimicrobineae_incertae_sedis	Aciditerrimonas	Unassigned
ASV1275	29	0	0	68	26	0	0	0	0	0	89	33	0	127	0	372	Bacteria{superkingdom}(98);Proteobacteria{phylum}(98);Alphaproteobacteria{class}(98);Rhodospirillales{order}(98);Rhodospirillaceae{family}(98);Dongia{genus}(98);Unassigned{species}(0)	Bacteria	Proteobacteria	Alphaproteobacteria	Rhodospirillales	Rhodospirillaceae	Dongia	Unassigned
ASV1276	0	0	0	0	0	0	0	0	0	0	0	0	0	0	23	23	Bacteria{superkingdom}(100);Bacteroidetes{phylum}(100);Sphingobacteriia{class}(100);Sphingobacteriales{order}(100);Chitinophagaceae{family}(100);Segetibacter{genus}(100);Unassigned{species}(0)	Bacteria	Bacteroidetes	Sphingobacteriia	Sphingobacteriales	Chitinophagaceae	Segetibacter	Unassigned
ASV1277	0	0	17	0	0	32	0	92	0	56	0	0	0	0	0	197	Bacteria{superkingdom}(98);Actinobacteria{phylum}(98);Actinobacteria{class}(98);Solirubrobacterales{order}(98);{family}(98);{genus}(98);Unassigned{species}(0)	Bacteria	Actinobacteria	Actinobacteria	Solirubrobacterales			Unassigned
ASV1278	20	63	120	34	17	0	32	0	0	23	0	0	18	0	0	327	Bacteria{superkingdom}(90);{phylum}(90);{class}(90);{order}(90);{family}(90);{genus}(90);uncultured_Actinomyces_sp.{species}(90)	Bacteria						uncultured_Actinomyces_sp.
ASV1279	43	0	28	23	90	0	0	0	35	0	25	0	0	0	0	244	Bacteria{superkingdom}(100);Planctomycetes{phylum}(100);Planctomycetia{class}(100);Planctomycetales{order}(100);Planctomycetaceae{family}(100);Gemmata{genus}(100);Unassigned{species}(0)	Bacteria	Planctomycetes	Planctomycetia	Planctomycetales	Planctomycetaceae	Gemmata	Unassigned
ASV1280	0	0	0	0	0	0	0	0	0	0	0	30	0	0	0	30	Bacteria{superkingdom}(100);Bacteroidetes{phylum}(100);Sphingobacteriia{class}(100);Sphingobacteriales{order}(100);Chitinophagaceae{family}(100);Flavisolibacter{genus}(100);Unassigned{species}(0)	Bacteria	Bacteroidetes	Sphingobacteriia	Sphingobacteriales	Chitinophagaceae	Flavisolibacter	Unassigned
ASV1281	94	70	76	0	45	412	87	10	41	35	0	0	0	0	0	870	Bacteria{superkingdom}(99);Chloroflexi{phylum}(99);Chloroflexia{class}(99);{order}(99);{family}(99);{genus}(99);uncultured_bacterium{species}(99)	Bacteria	Chloroflexi	Chloroflexia				uncultured_bacterium
ASV1282	61	79	20	0	0	0	0	0	21	0	0	46	0	0	28	255	Bacteria{superkingdom}(100);{phylum}(100);{class}(100);{order}(100);{family}(100);{genus}(100);uncultured_Anaerolineae_bacterium{species}(100)	Bacteria						uncultured_Anaerolineae_bacterium
ASV1285	0	496	0	0	0	0	0	0	13	37	8	0	0	17	22	593	Bacteria{superkingdom}(100);Unassigned{phylum}(0);Unassigned{class}(0);Unassigned{order}(0);Unassigned{family}(0);Unassigned{genus}(0);Unassigned{species}(0)	Bacteria	Unassigned	Unassigned	Unassigned	Unassigned	Unassigned	Unassigned
ASV1286	122	21	40	193	407	42	13	15	9	0	229	0	9	0	40	1140	Bacteria{superkingdom}(90);Proteobacteria{phylum}(90);Gammaproteobacteria{class}(90);Xanthomonadales{order}(90);Sinobacteraceae{family}(90);Steroidobacter{genus}(90);uncultured_gamma_proteobacterium{species}(90)	Bacteria	Proteobacteria	Gammaproteobacteria	Xanthomonadales	Sinobacteraceae	Steroidobacter	uncultured_gamma_proteobacterium
ASV1287	0	107	0	0	0	0	0	0	0	0	0	0	0	23	0	130	Bacteria{superkingdom}(95);Bacteroidetes{phylum}(95);Sphingobacteriia{class}(95);Sphingobacteriales{order}(95);Chitinophagaceae{family}(95);Flavisolibacter{genus}(95);Unassigned{species}(0)	Bacteria	Bacteroidetes	Sphingobacteriia	Sphingobacteriales	Chitinophagaceae	Flavisolibacter	Unassigned
ASV1288	42	28	26	20	0	52	51	74	30	37	36	26	10	14	36	482	Bacteria{superkingdom}(100);Unassigned{phylum}(0);Unassigned{class}(0);Unassigned{order}(0);Unassigned{family}(0);Unassigned{genus}(0);Unassigned{species}(0)	Bacteria	Unassigned	Unassigned	Unassigned	Unassigned	Unassigned	Unassigned
ASV1290	29	22	28	0	0	0	0	0	0	0	0	0	0	40	0	119	Bacteria{superkingdom}(100);Acidobacteria{phylum}(100);Acidobacteria_Gp6{class}(100);{order}(100);{family}(100);Gp6{genus}(100);Unassigned{species}(0)	Bacteria	Acidobacteria	Acidobacteria_Gp6			Gp6	Unassigned
ASV1291	0	9	0	0	0	0	4	0	10	0	0	0	0	0	0	23	Bacteria{superkingdom}(90);Bacteroidetes{phylum}(90);Cytophagia{class}(90);Cytophagales{order}(90);Cytophagaceae{family}(90);Rhodocytophaga{genus}(90);uncultured_Flexibacteraceae_bacterium{species}(90)	Bacteria	Bacteroidetes	Cytophagia	Cytophagales	Cytophagaceae	Rhodocytophaga	uncultured_Flexibacteraceae_bacterium
ASV1292	0	0	0	0	0	0	0	0	0	0	0	0	103	0	0	103	Bacteria{superkingdom}(100);Bacteroidetes{phylum}(100);Cytophagia{class}(100);Cytophagales{order}(100);Cytophagaceae{family}(100);Adhaeribacter{genus}(100);Unassigned{species}(0)	Bacteria	Bacteroidetes	Cytophagia	Cytophagales	Cytophagaceae	Adhaeribacter	Unassigned
ASV1293	30	0	0	13	0	0	0	0	0	44	0	60	0	32	0	179	Bacteria{superkingdom}(100);Planctomycetes{phylum}(100);Planctomycetia{class}(100);Planctomycetales{order}(100);Planctomycetaceae{family}(100);Pirellula{genus}(100);Unassigned{species}(0)	Bacteria	Planctomycetes	Planctomycetia	Planctomycetales	Planctomycetaceae	Pirellula	Unassigned
ASV1296	0	0	82	0	22	0	32	0	0	45	0	0	0	34	0	215	Bacteria{superkingdom}(100);Chloroflexi{phylum}(100);Chloroflexia{class}(100);{order}(100);{family}(100);{genus}(100);Unassigned{species}(0)	Bacteria	Chloroflexi	Chloroflexia				Unassigned
ASV1297	0	101	26	0	26	71	75	45	52	68	34	34	49	14	54	649	Bacteria{superkingdom}(91);Proteobacteria{phylum}(91);Alphaproteobacteria{class}(91);Rhizobiales{order}(91);Hyphomicrobiaceae{family}(91);Rhodoplanes{genus}(91);Unassigned{species}(0)	Bacteria	Proteobacteria	Alphaproteobacteria	Rhizobiales	Hyphomicrobiaceae	Rhodoplanes	Unassigned
ASV1298	29	53	0	24	20	0	21	37	0	45	0	20	27	64	108	448	Bacteria{superkingdom}(100);Proteobacteria{phylum}(100);Alphaproteobacteria{class}(100);Rhizobiales{order}(100);Unassigned{family}(0);Unassigned{genus}(0);Unassigned{species}(0)	Bacteria	Proteobacteria	Alphaproteobacteria	Rhizobiales	Unassigned	Unassigned	Unassigned
ASV1299	57	24	0	0	0	35	0	26	87	37	10	0	21	0	10	307	Bacteria{superkingdom}(82);Planctomycetes{phylum}(82);Planctomycetia{class}(82);Planctomycetales{order}(82);Planctomycetaceae{family}(82);{genus}(82);uncultured_Zavarzinella_sp.{species}(82)	Bacteria	Planctomycetes	Planctomycetia	Planctomycetales	Planctomycetaceae		uncultured_Zavarzinella_sp.
ASV1300	0	0	0	0	0	0	0	0	0	17	0	25	63	79	0	184	Bacteria{superkingdom}(100);Proteobacteria{phylum}(100);Alphaproteobacteria{class}(100);Rhodospirillales{order}(100);Rhodospirillaceae{family}(100);Unassigned{genus}(0);Unassigned{species}(0)	Bacteria	Proteobacteria	Alphaproteobacteria	Rhodospirillales	Rhodospirillaceae	Unassigned	Unassigned
ASV1301	0	0	0	0	0	0	0	0	0	0	0	110	154	158	0	422	Bacteria{superkingdom}(100);Acidobacteria{phylum}(100);Acidobacteria_Gp6{class}(100);{order}(100);{family}(100);Gp6{genus}(100);Unassigned{species}(0)	Bacteria	Acidobacteria	Acidobacteria_Gp6			Gp6	Unassigned
ASV1303	0	38	18	0	22	663	238	219	33	249	0	0	0	0	0	1480	Bacteria{superkingdom}(98);Chloroflexi{phylum}(98);Caldilineae{class}(98);Caldilineales{order}(98);Caldilineaceae{family}(98);{genus}(98);uncultured_Chloroflexi_bacterium{species}(98)	Bacteria	Chloroflexi	Caldilineae	Caldilineales	Caldilineaceae		uncultured_Chloroflexi_bacterium
ASV1304	29	0	52	11	28	90	101	61	27	85	71	0	85	10	77	727	Bacteria{superkingdom}(100);Unassigned{phylum}(0);Unassigned{class}(0);Unassigned{order}(0);Unassigned{family}(0);Unassigned{genus}(0);Unassigned{species}(0)	Bacteria	Unassigned	Unassigned	Unassigned	Unassigned	Unassigned	Unassigned
ASV1306	28	9	138	0	19	82	0	0	51	11	0	0	0	26	0	364	Bacteria{superkingdom}(98);Chloroflexi{phylum}(98);Unassigned{class}(0);Unassigned{order}(0);Unassigned{family}(0);Unassigned{genus}(0);Unassigned{species}(0)	Bacteria	Chloroflexi	Unassigned	Unassigned	Unassigned	Unassigned	Unassigned
ASV1307	0	0	0	0	0	13	0	29	28	46	0	0	0	0	78	194	Bacteria{superkingdom}(96);Actinobacteria{phylum}(96);Actinobacteria{class}(96);{order}(96);{family}(96);{genus}(96);Unassigned{species}(0)	Bacteria	Actinobacteria	Actinobacteria				Unassigned
ASV1308	14	0	71	6	0	16	10	52	26	12	17	36	0	41	13	314	Bacteria{superkingdom}(100);Planctomycetes{phylum}(100);Planctomycetia{class}(100);Planctomycetales{order}(100);Planctomycetaceae{family}(100);Pirellula{genus}(100);Unassigned{species}(0)	Bacteria	Planctomycetes	Planctomycetia	Planctomycetales	Planctomycetaceae	Pirellula	Unassigned
ASV1309	0	0	19	38	33	0	34	8	0	57	0	0	36	0	0	225	Bacteria{superkingdom}(91);Proteobacteria{phylum}(91);Alphaproteobacteria{class}(91);Sphingomonadales{order}(91);Erythrobacteraceae{family}(91);Altererythrobacter{genus}(91);Unassigned{species}(0)	Bacteria	Proteobacteria	Alphaproteobacteria	Sphingomonadales	Erythrobacteraceae	Altererythrobacter	Unassigned
ASV1310	13	0	12	13	0	19	25	271	9	15	0	0	0	0	0	377	Bacteria{superkingdom}(81);Proteobacteria{phylum}(81);Gammaproteobacteria{class}(81);Chromatiales{order}(81);Unassigned{family}(0);Unassigned{genus}(0);Unassigned{species}(0)	Bacteria	Proteobacteria	Gammaproteobacteria	Chromatiales	Unassigned	Unassigned	Unassigned
ASV1311	0	0	0	8	0	73	13	38	25	63	182	53	24	21	74	574	Bacteria{superkingdom}(100);Chloroflexi{phylum}(100);Anaerolineae{class}(100);Anaerolineales{order}(100);Anaerolineaceae{family}(100);{genus}(100);uncultured_Gemmatimonadetes_bacterium{species}(100)	Bacteria	Chloroflexi	Anaerolineae	Anaerolineales	Anaerolineaceae		uncultured_Gemmatimonadetes_bacterium
ASV1312	0	299	0	0	0	120	133	0	124	0	0	0	80	63	327	1146	Bacteria{superkingdom}(96);Proteobacteria{phylum}(96);Alphaproteobacteria{class}(96);Rhizobiales{order}(96);Rhodobiaceae{family}(96);{genus}(96);Unassigned{species}(0)	Bacteria	Proteobacteria	Alphaproteobacteria	Rhizobiales	Rhodobiaceae		Unassigned
ASV1313	0	0	0	0	0	0	0	0	0	0	0	36	0	41	0	77	Bacteria{superkingdom}(100);Actinobacteria{phylum}(100);Actinobacteria{class}(100);Actinomycetales{order}(100);Nocardioidaceae{family}(100);Nocardioides{genus}(100);Unassigned{species}(0)	Bacteria	Actinobacteria	Actinobacteria	Actinomycetales	Nocardioidaceae	Nocardioides	Unassigned
ASV1315	0	7	0	0	0	0	0	0	7	31	0	12	17	0	0	74	Bacteria{superkingdom}(100);Chloroflexi{phylum}(100);Unassigned{class}(0);Unassigned{order}(0);Unassigned{family}(0);Unassigned{genus}(0);Unassigned{species}(0)	Bacteria	Chloroflexi	Unassigned	Unassigned	Unassigned	Unassigned	Unassigned
ASV1316	21	0	0	16	0	0	0	0	13	0	0	0	0	0	0	50	Bacteria{superkingdom}(98);Actinobacteria{phylum}(98);Actinobacteria{class}(98);Unassigned{order}(0);Unassigned{family}(0);Unassigned{genus}(0);Unassigned{species}(0)	Bacteria	Actinobacteria	Actinobacteria	Unassigned	Unassigned	Unassigned	Unassigned
ASV1317	17	44	57	35	23	40	42	18	0	0	14	0	0	0	36	326	Bacteria{superkingdom}(95);Proteobacteria{phylum}(95);Alphaproteobacteria{class}(95);Rhodospirillales{order}(95);Rhodospirillaceae{family}(95);{genus}(95);uncultured_Nitrobacter_sp.{species}(95)	Bacteria	Proteobacteria	Alphaproteobacteria	Rhodospirillales	Rhodospirillaceae		uncultured_Nitrobacter_sp.
ASV1318	32	17	0	76	0	225	0	0	357	0	0	0	0	0	74	781	Bacteria{superkingdom}(99);{phylum}(99);{class}(99);{order}(99);{family}(99);{genus}(99);uncultured_Syntrophobacterales_bacterium{species}(99)	Bacteria						uncultured_Syntrophobacterales_bacterium
ASV1319	0	83	0	0	0	0	83	181	0	173	0	75	90	98	90	873	Bacteria{superkingdom}(100);Actinobacteria{phylum}(100);Actinobacteria{class}(100);Actinomycetales{order}(100);Microbacteriaceae{family}(100);Unassigned{genus}(0);Unassigned{species}(0)	Bacteria	Actinobacteria	Actinobacteria	Actinomycetales	Microbacteriaceae	Unassigned	Unassigned
ASV1320	0	172	0	154	62	0	0	0	0	0	0	0	0	0	0	388	Bacteria{superkingdom}(100);Chloroflexi{phylum}(100);Thermomicrobia{class}(100);Sphaerobacterales{order}(100);Sphaerobacteraceae{family}(100);Sphaerobacter{genus}(100);uncultured_bacterium{species}(100)	Bacteria	Chloroflexi	Thermomicrobia	Sphaerobacterales	Sphaerobacteraceae	Sphaerobacter	uncultured_bacterium
ASV1321	0	0	0	0	0	0	0	0	0	0	0	0	55	76	0	131	Bacteria{superkingdom}(99);Bacteroidetes{phylum}(99);Cytophagia{class}(99);Cytophagales{order}(99);Cytophagaceae{family}(99);Nibrella{genus}(99);uncultured_bacterium{species}(99)	Bacteria	Bacteroidetes	Cytophagia	Cytophagales	Cytophagaceae	Nibrella	uncultured_bacterium
ASV1322	25	0	53	27	121	0	0	0	11	0	0	0	0	0	11	248	Bacteria{superkingdom}(100);Armatimonadetes{phylum}(100);{class}(100);{order}(100);{family}(100);Armatimonadetes_gp4{genus}(100);uncultured_bacterium{species}(100)	Bacteria	Armatimonadetes				Armatimonadetes_gp4	uncultured_bacterium
ASV1323	0	22	0	222	0	0	0	0	0	0	0	0	0	0	0	244	Bacteria{superkingdom}(100);Proteobacteria{phylum}(100);Gammaproteobacteria{class}(100);Xanthomonadales{order}(100);Xanthomonadaceae{family}(100);Lysobacter{genus}(100);Unassigned{species}(0)	Bacteria	Proteobacteria	Gammaproteobacteria	Xanthomonadales	Xanthomonadaceae	Lysobacter	Unassigned
ASV1324	55	39	60	34	20	92	33	35	98	44	135	23	0	19	0	687	Bacteria{superkingdom}(99);Armatimonadetes{phylum}(99);{class}(99);{order}(99);{family}(99);Armatimonadetes_gp4{genus}(99);uncultured_Firmicutes_bacterium{species}(99)	Bacteria	Armatimonadetes				Armatimonadetes_gp4	uncultured_Firmicutes_bacterium
ASV1325	0	110	0	0	0	0	0	12	0	3	0	0	0	0	0	125	Bacteria{superkingdom}(89);Armatimonadetes{phylum}(89);Armatimonadia{class}(89);Armatimonadales{order}(89);Armatimonadaceae{family}(89);Armatimonas/Armatimonadetes_gp1{genus}(89);uncultured_bacterium{species}(89)	Bacteria	Armatimonadetes	Armatimonadia	Armatimonadales	Armatimonadaceae	Armatimonas/Armatimonadetes_gp1	uncultured_bacterium
ASV1326	0	0	0	0	10	0	6	9	9	13	0	0	13	0	0	60	Bacteria{superkingdom}(100);Proteobacteria{phylum}(100);Betaproteobacteria{class}(100);Burkholderiales{order}(100);Burkholderiaceae{family}(100);Cupriavidus{genus}(100);Unassigned{species}(0)	Bacteria	Proteobacteria	Betaproteobacteria	Burkholderiales	Burkholderiaceae	Cupriavidus	Unassigned
ASV1327	0	0	0	0	0	0	0	0	0	0	0	0	10	17	0	27	Bacteria{superkingdom}(98);Chloroflexi{phylum}(98);Chloroflexia{class}(98);{order}(98);{family}(98);{genus}(98);uncultured_bacterium{species}(98)	Bacteria	Chloroflexi	Chloroflexia				uncultured_bacterium
ASV1328	0	0	0	0	0	0	0	23	17	0	18	0	16	0	0	74	Bacteria{superkingdom}(99);Actinobacteria{phylum}(99);Actinobacteria{class}(99);Solirubrobacterales{order}(99);Solirubrobacteraceae{family}(99);Solirubrobacter{genus}(99);Unassigned{species}(0)	Bacteria	Actinobacteria	Actinobacteria	Solirubrobacterales	Solirubrobacteraceae	Solirubrobacter	Unassigned
ASV1330	0	0	0	66	0	0	0	0	0	0	0	0	0	0	0	66	Bacteria{superkingdom}(100);Proteobacteria{phylum}(100);Betaproteobacteria{class}(100);Burkholderiales{order}(100);Oxalobacteraceae{family}(100);Massilia{genus}(100);Unassigned{species}(0)	Bacteria	Proteobacteria	Betaproteobacteria	Burkholderiales	Oxalobacteraceae	Massilia	Unassigned
ASV1332	0	0	0	0	0	0	20	0	0	0	0	0	0	0	0	20	Bacteria{superkingdom}(100);Actinobacteria{phylum}(100);Actinobacteria{class}(100);Actinomycetales{order}(100);Streptosporangiaceae{family}(100);Nonomuraea{genus}(100);Unassigned{species}(0)	Bacteria	Actinobacteria	Actinobacteria	Actinomycetales	Streptosporangiaceae	Nonomuraea	Unassigned
ASV1333	0	0	0	0	0	0	0	16	0	69	0	0	0	0	0	85	Bacteria{superkingdom}(100);Acidobacteria{phylum}(100);Acidobacteria_Gp4{class}(100);{order}(100);{family}(100);Gp4{genus}(100);Unassigned{species}(0)	Bacteria	Acidobacteria	Acidobacteria_Gp4			Gp4	Unassigned
ASV1334	31	555	10	26	16	46	21	10	60	24	89	0	15	0	38	941	Bacteria{superkingdom}(94);Proteobacteria{phylum}(94);Deltaproteobacteria{class}(94);Myxococcales{order}(94);Cystobacteraceae{family}(94);{genus}(94);uncultured_delta_proteobacterium{species}(94)	Bacteria	Proteobacteria	Deltaproteobacteria	Myxococcales	Cystobacteraceae		uncultured_delta_proteobacterium
ASV1335	0	13	0	0	0	0	0	0	0	0	0	0	0	0	0	13	Bacteria{superkingdom}(100);Acidobacteria{phylum}(100);Acidobacteria_Gp4{class}(100);{order}(100);{family}(100);Unassigned{genus}(0);Unassigned{species}(0)	Bacteria	Acidobacteria	Acidobacteria_Gp4			Unassigned	Unassigned
ASV1336	0	0	0	0	0	11	0	0	0	0	0	0	154	0	19	184	Bacteria{superkingdom}(91);Acidobacteria{phylum}(91);Acidobacteria_Gp16{class}(91);{order}(91);{family}(91);Gp16{genus}(91);Unassigned{species}(0)	Bacteria	Acidobacteria	Acidobacteria_Gp16			Gp16	Unassigned
ASV1337	6	0	0	0	0	11	5	5	0	54	0	0	104	22	19	226	Bacteria{superkingdom}(100);Unassigned{phylum}(0);Unassigned{class}(0);Unassigned{order}(0);Unassigned{family}(0);Unassigned{genus}(0);Unassigned{species}(0)	Bacteria	Unassigned	Unassigned	Unassigned	Unassigned	Unassigned	Unassigned
ASV1338	15	0	0	0	0	0	0	0	0	0	0	0	0	0	0	15	Bacteria{superkingdom}(100);Acidobacteria{phylum}(100);Acidobacteria_Gp7{class}(100);{order}(100);{family}(100);Gp7{genus}(100);Unassigned{species}(0)	Bacteria	Acidobacteria	Acidobacteria_Gp7			Gp7	Unassigned
ASV1339	0	0	0	0	0	0	0	0	0	0	0	9	0	0	0	9	Bacteria{superkingdom}(99);Actinobacteria{phylum}(99);Actinobacteria{class}(99);Actinomycetales{order}(99);Nocardioidaceae{family}(99);Nocardioides{genus}(99);Unassigned{species}(0)	Bacteria	Actinobacteria	Actinobacteria	Actinomycetales	Nocardioidaceae	Nocardioides	Unassigned
ASV1340	61	78	19	0	81	203	164	86	0	97	0	0	0	47	45	881	Bacteria{superkingdom}(100);Acidobacteria{phylum}(100);Acidobacteria_Gp6{class}(100);{order}(100);{family}(100);Gp6{genus}(100);Unassigned{species}(0)	Bacteria	Acidobacteria	Acidobacteria_Gp6			Gp6	Unassigned
ASV1341	0	0	0	0	45	43	0	4	91	0	306	10	0	0	0	499	Bacteria{superkingdom}(100);Unassigned{phylum}(0);Unassigned{class}(0);Unassigned{order}(0);Unassigned{family}(0);Unassigned{genus}(0);Unassigned{species}(0)	Bacteria	Unassigned	Unassigned	Unassigned	Unassigned	Unassigned	Unassigned
ASV1343	0	0	28	73	44	0	20	38	0	0	53	21	0	91	28	396	Bacteria{superkingdom}(97);Planctomycetes{phylum}(97);Planctomycetia{class}(97);Planctomycetales{order}(97);Planctomycetaceae{family}(97);Blastopirellula{genus}(97);uncultured_bacterium{species}(97)	Bacteria	Planctomycetes	Planctomycetia	Planctomycetales	Planctomycetaceae	Blastopirellula	uncultured_bacterium
ASV1344	8	0	23	0	0	0	0	94	0	0	0	26	0	0	0	151	Bacteria{superkingdom}(96);Actinobacteria{phylum}(96);Actinobacteria{class}(96);Acidimicrobiales{order}(96);Acidimicrobineae_incertae_sedis{family}(96);Aciditerrimonas{genus}(96);uncultured_Acidimicrobineae_bacterium{species}(96)	Bacteria	Actinobacteria	Actinobacteria	Acidimicrobiales	Acidimicrobineae_incertae_sedis	Aciditerrimonas	uncultured_Acidimicrobineae_bacterium
ASV1345	0	56	0	0	0	0	0	0	0	14	0	0	0	0	0	70	Bacteria{superkingdom}(96);Proteobacteria{phylum}(96);Alphaproteobacteria{class}(96);Rhizobiales{order}(96);{family}(96);{genus}(96);uncultured_endolithic_bacterium{species}(96)	Bacteria	Proteobacteria	Alphaproteobacteria	Rhizobiales			uncultured_endolithic_bacterium
ASV1348	40	13	0	0	90	0	0	135	0	0	0	0	0	0	15	293	Bacteria{superkingdom}(99);Firmicutes{phylum}(99);Bacilli{class}(99);Bacillales{order}(99);Bacillaceae_1{family}(99);Bacillus{genus}(99);Unassigned{species}(0)	Bacteria	Firmicutes	Bacilli	Bacillales	Bacillaceae_1	Bacillus	Unassigned
ASV1349	21	16	0	18	29	0	0	0	0	0	0	0	0	0	0	84	Bacteria{superkingdom}(100);Acidobacteria{phylum}(100);Acidobacteria_Gp3{class}(100);{order}(100);{family}(100);{genus}(100);Acidobacteria_bacterium_IGE-016{species}(100)	Bacteria	Acidobacteria	Acidobacteria_Gp3				Acidobacteria_bacterium_IGE-016
ASV1350	124	0	105	0	0	0	0	0	0	0	0	0	0	0	0	229	Bacteria{superkingdom}(98);Firmicutes{phylum}(98);Bacilli{class}(98);Bacillales{order}(98);Paenibacillaceae_1{family}(98);Paenibacillus{genus}(98);Unassigned{species}(0)	Bacteria	Firmicutes	Bacilli	Bacillales	Paenibacillaceae_1	Paenibacillus	Unassigned
ASV1351	0	0	0	0	0	0	0	0	0	0	0	58	124	0	0	182	Bacteria{superkingdom}(100);Actinobacteria{phylum}(100);Actinobacteria{class}(100);Actinomycetales{order}(100);Pseudonocardiaceae{family}(100);Pseudonocardia{genus}(100);Unassigned{species}(0)	Bacteria	Actinobacteria	Actinobacteria	Actinomycetales	Pseudonocardiaceae	Pseudonocardia	Unassigned
ASV1352	0	0	0	0	14	0	0	0	0	0	0	0	0	0	0	14	Bacteria{superkingdom}(100);Chloroflexi{phylum}(100);{class}(100);{order}(100);{family}(100);{genus}(100);uncultured_endolithic_bacterium{species}(100)	Bacteria	Chloroflexi					uncultured_endolithic_bacterium
ASV1353	0	71	0	0	0	0	37	0	0	105	0	104	90	65	62	534	Bacteria{superkingdom}(100);Actinobacteria{phylum}(100);Actinobacteria{class}(100);Actinomycetales{order}(100);Nocardioidaceae{family}(100);Nocardioides{genus}(100);Unassigned{species}(0)	Bacteria	Actinobacteria	Actinobacteria	Actinomycetales	Nocardioidaceae	Nocardioides	Unassigned
ASV1354	0	0	0	0	0	0	0	56	0	0	0	0	0	48	34	138	Bacteria{superkingdom}(100);Unassigned{phylum}(0);Unassigned{class}(0);Unassigned{order}(0);Unassigned{family}(0);Unassigned{genus}(0);Unassigned{species}(0)	Bacteria	Unassigned	Unassigned	Unassigned	Unassigned	Unassigned	Unassigned
ASV1355	0	0	0	311	0	0	0	0	17	0	0	0	0	0	0	328	Bacteria{superkingdom}(97);Actinobacteria{phylum}(97);Actinobacteria{class}(97);Actinomycetales{order}(97);Nocardiaceae{family}(97);Nocardia{genus}(97);Unassigned{species}(0)	Bacteria	Actinobacteria	Actinobacteria	Actinomycetales	Nocardiaceae	Nocardia	Unassigned
ASV1356	9	0	8	53	10	19	0	0	16	38	10	0	0	0	0	163	Bacteria{superkingdom}(99);Proteobacteria{phylum}(99);Betaproteobacteria{class}(99);Burkholderiales{order}(99);Oxalobacteraceae{family}(99);Massilia{genus}(99);Unassigned{species}(0)	Bacteria	Proteobacteria	Betaproteobacteria	Burkholderiales	Oxalobacteraceae	Massilia	Unassigned
ASV1357	18	87	21	27	45	39	24	34	0	34	0	0	0	0	20	349	Bacteria{superkingdom}(92);Actinobacteria{phylum}(92);Actinobacteria{class}(92);Solirubrobacterales{order}(92);{family}(92);{genus}(92);Unassigned{species}(0)	Bacteria	Actinobacteria	Actinobacteria	Solirubrobacterales			Unassigned
ASV1358	0	0	0	0	0	0	0	39	0	15	0	0	10	0	0	64	Bacteria{superkingdom}(100);Acidobacteria{phylum}(100);Acidobacteria_Gp7{class}(100);{order}(100);{family}(100);Gp7{genus}(100);Unassigned{species}(0)	Bacteria	Acidobacteria	Acidobacteria_Gp7			Gp7	Unassigned
ASV1359	62	5	54	0	0	0	160	0	0	323	41	0	63	193	120	1021	Bacteria{superkingdom}(100);Actinobacteria{phylum}(100);Actinobacteria{class}(100);Solirubrobacterales{order}(100);Unassigned{family}(0);Unassigned{genus}(0);Unassigned{species}(0)	Bacteria	Actinobacteria	Actinobacteria	Solirubrobacterales	Unassigned	Unassigned	Unassigned
ASV1360	88	51	34	27	35	27	21	40	63	24	41	30	19	12	30	542	Bacteria{superkingdom}(92);Proteobacteria{phylum}(92);Gammaproteobacteria{class}(92);Chromatiales{order}(92);Unassigned{family}(0);Unassigned{genus}(0);Unassigned{species}(0)	Bacteria	Proteobacteria	Gammaproteobacteria	Chromatiales	Unassigned	Unassigned	Unassigned
ASV1362	34	36	0	66	74	24	0	22	32	32	28	35	62	28	36	509	Bacteria{superkingdom}(100);Proteobacteria{phylum}(100);Alphaproteobacteria{class}(100);{order}(100);{family}(100);{genus}(100);rhizosphere_soil_bacterium_RSC-II-82{species}(100)	Bacteria	Proteobacteria	Alphaproteobacteria				rhizosphere_soil_bacterium_RSC-II-82
ASV1363	0	0	0	0	0	0	0	0	0	38	0	0	0	0	28	66	Bacteria{superkingdom}(100);Acidobacteria{phylum}(100);Acidobacteria_Gp4{class}(100);{order}(100);{family}(100);Unassigned{genus}(0);Unassigned{species}(0)	Bacteria	Acidobacteria	Acidobacteria_Gp4			Unassigned	Unassigned
ASV1364	46	0	26	88	69	29	0	0	20	3	0	0	0	3	0	284	Bacteria{superkingdom}(100);Planctomycetes{phylum}(100);Planctomycetia{class}(100);Planctomycetales{order}(100);Planctomycetaceae{family}(100);{genus}(100);Unassigned{species}(0)	Bacteria	Planctomycetes	Planctomycetia	Planctomycetales	Planctomycetaceae		Unassigned
ASV1365	0	0	0	17	0	0	0	0	0	0	34	0	0	0	0	51	Bacteria{superkingdom}(100);Proteobacteria{phylum}(100);Deltaproteobacteria{class}(100);Myxococcales{order}(100);Polyangiaceae{family}(100);Unassigned{genus}(0);Unassigned{species}(0)	Bacteria	Proteobacteria	Deltaproteobacteria	Myxococcales	Polyangiaceae	Unassigned	Unassigned
ASV1368	9	183	70	0	24	22	33	2	0	2	0	0	0	0	11	356	Bacteria{superkingdom}(100);Acidobacteria{phylum}(100);Acidobacteria_Gp16{class}(100);{order}(100);{family}(100);Gp16{genus}(100);Unassigned{species}(0)	Bacteria	Acidobacteria	Acidobacteria_Gp16			Gp16	Unassigned
ASV1369	0	24	0	73	451	23	37	0	0	0	0	0	0	0	13	621	Bacteria{superkingdom}(100);Unassigned{phylum}(0);Unassigned{class}(0);Unassigned{order}(0);Unassigned{family}(0);Unassigned{genus}(0);Unassigned{species}(0)	Bacteria	Unassigned	Unassigned	Unassigned	Unassigned	Unassigned	Unassigned
ASV1370	27	0	0	0	0	0	0	0	0	0	0	0	0	0	0	27	Bacteria{superkingdom}(100);Proteobacteria{phylum}(100);Betaproteobacteria{class}(100);Burkholderiales{order}(100);Burkholderiaceae{family}(100);Cupriavidus{genus}(100);Unassigned{species}(0)	Bacteria	Proteobacteria	Betaproteobacteria	Burkholderiales	Burkholderiaceae	Cupriavidus	Unassigned
ASV1371	0	0	0	0	0	0	0	0	0	40	0	0	0	0	0	40	Bacteria{superkingdom}(100);Actinobacteria{phylum}(100);Actinobacteria{class}(100);Actinomycetales{order}(100);Nocardioidaceae{family}(100);{genus}(100);Unassigned{species}(0)	Bacteria	Actinobacteria	Actinobacteria	Actinomycetales	Nocardioidaceae		Unassigned
ASV1372	0	0	0	0	0	12	0	0	11	78	0	0	0	0	0	101	Bacteria{superkingdom}(84);Planctomycetes{phylum}(84);Planctomycetia{class}(84);Planctomycetales{order}(84);Planctomycetaceae{family}(84);{genus}(84);Unassigned{species}(0)	Bacteria	Planctomycetes	Planctomycetia	Planctomycetales	Planctomycetaceae		Unassigned
ASV1373	14	16	23	19	34	14	44	29	334	40	0	0	0	0	0	567	Bacteria{superkingdom}(84);Chloroflexi{phylum}(84);Anaerolineae{class}(84);Anaerolineales{order}(84);Anaerolineaceae{family}(84);{genus}(84);Unassigned{species}(0)	Bacteria	Chloroflexi	Anaerolineae	Anaerolineales	Anaerolineaceae		Unassigned
ASV1374	0	0	63	35	28	95	63	0	0	41	0	26	0	0	116	467	Bacteria{superkingdom}(100);Actinobacteria{phylum}(100);Unassigned{class}(0);Unassigned{order}(0);Unassigned{family}(0);Unassigned{genus}(0);Unassigned{species}(0)	Bacteria	Actinobacteria	Unassigned	Unassigned	Unassigned	Unassigned	Unassigned
ASV1375	19	36	18	38	29	0	0	22	16	38	0	0	0	7	0	223	Bacteria{superkingdom}(99);Proteobacteria{phylum}(99);Alphaproteobacteria{class}(99);Rhizobiales{order}(99);Phyllobacteriaceae{family}(99);Mesorhizobium{genus}(99);Unassigned{species}(0)	Bacteria	Proteobacteria	Alphaproteobacteria	Rhizobiales	Phyllobacteriaceae	Mesorhizobium	Unassigned
ASV1376	43	175	153	0	24	0	0	0	0	0	0	0	0	0	0	395	Bacteria{superkingdom}(92);{phylum}(92);{class}(92);{order}(92);{family}(92);{genus}(92);uncultured_Micromonospora_sp.{species}(92)	Bacteria						uncultured_Micromonospora_sp.
ASV1377	19	0	19	0	24	0	206	382	20	72	0	0	84	0	0	826	Bacteria{superkingdom}(100);Bacteroidetes{phylum}(100);Sphingobacteriia{class}(100);Sphingobacteriales{order}(100);Chitinophagaceae{family}(100);Unassigned{genus}(0);Unassigned{species}(0)	Bacteria	Bacteroidetes	Sphingobacteriia	Sphingobacteriales	Chitinophagaceae	Unassigned	Unassigned
ASV1378	0	0	0	47	13	45	45	0	0	0	0	0	0	8	0	158	Bacteria{superkingdom}(100);Acidobacteria{phylum}(100);Acidobacteria_Gp6{class}(100);{order}(100);{family}(100);Gp6{genus}(100);Unassigned{species}(0)	Bacteria	Acidobacteria	Acidobacteria_Gp6			Gp6	Unassigned
ASV1379	0	0	0	0	0	0	0	0	0	100	0	26	0	0	0	126	Bacteria{superkingdom}(91);Proteobacteria{phylum}(91);Alphaproteobacteria{class}(91);Rhizobiales{order}(91);Hyphomicrobiaceae{family}(91);Devosia{genus}(91);Unassigned{species}(0)	Bacteria	Proteobacteria	Alphaproteobacteria	Rhizobiales	Hyphomicrobiaceae	Devosia	Unassigned
ASV1381	0	23	26	0	19	2	0	0	8	0	0	0	0	0	0	78	Bacteria{superkingdom}(100);Acidobacteria{phylum}(100);Acidobacteria_Gp6{class}(100);{order}(100);{family}(100);Gp6{genus}(100);Unassigned{species}(0)	Bacteria	Acidobacteria	Acidobacteria_Gp6			Gp6	Unassigned
ASV1382	0	47	0	0	0	0	0	52	0	0	0	0	0	0	0	99	Bacteria{superkingdom}(94);Actinobacteria{phylum}(94);{class}(94);{order}(94);{family}(94);{genus}(94);uncultured_Rubrobacteridae_bacterium{species}(94)	Bacteria	Actinobacteria					uncultured_Rubrobacteridae_bacterium
ASV1383	0	6	0	0	0	0	0	31	0	0	0	0	0	0	0	37	Bacteria{superkingdom}(82);Proteobacteria{phylum}(82);Alphaproteobacteria{class}(82);Rhizobiales{order}(82);Methylobacteriaceae{family}(82);{genus}(82);uncultured_bacterium{species}(82)	Bacteria	Proteobacteria	Alphaproteobacteria	Rhizobiales	Methylobacteriaceae		uncultured_bacterium
ASV1384	0	0	0	45	67	0	0	0	0	0	31	0	0	0	52	195	Bacteria{superkingdom}(100);Acidobacteria{phylum}(100);Acidobacteria_Gp6{class}(100);{order}(100);{family}(100);Gp6{genus}(100);Unassigned{species}(0)	Bacteria	Acidobacteria	Acidobacteria_Gp6			Gp6	Unassigned
ASV1386	218	0	0	0	0	0	0	0	0	0	0	0	35	0	0	253	Bacteria{superkingdom}(95);Firmicutes{phylum}(95);Bacilli{class}(95);Bacillales{order}(95);Bacillaceae_1{family}(95);Bacillus{genus}(95);Bacillus_funiculus{species}(95)	Bacteria	Firmicutes	Bacilli	Bacillales	Bacillaceae_1	Bacillus	Bacillus_funiculus
ASV1388	0	17	0	0	0	31	0	10	0	8	0	2	27	52	4	151	Bacteria{superkingdom}(100);Proteobacteria{phylum}(100);Alphaproteobacteria{class}(100);Alphaproteobacteria_incertae_sedis{order}(100);{family}(100);Geminicoccus{genus}(100);Unassigned{species}(0)	Bacteria	Proteobacteria	Alphaproteobacteria	Alphaproteobacteria_incertae_sedis		Geminicoccus	Unassigned
ASV1389	0	0	0	22	0	0	0	0	13	0	0	45	0	0	0	80	Bacteria{superkingdom}(99);Acidobacteria{phylum}(99);Acidobacteria_Gp4{class}(99);{order}(99);{family}(99);Gp4{genus}(99);Unassigned{species}(0)	Bacteria	Acidobacteria	Acidobacteria_Gp4			Gp4	Unassigned
ASV1390	0	0	0	0	0	0	9	19	0	10	0	0	0	5	0	43	Bacteria{superkingdom}(92);Chloroflexi{phylum}(92);Anaerolineae{class}(92);Anaerolineales{order}(92);Anaerolineaceae{family}(92);{genus}(92);Unassigned{species}(0)	Bacteria	Chloroflexi	Anaerolineae	Anaerolineales	Anaerolineaceae		Unassigned
ASV1392	0	39	30	49	0	53	0	0	60	64	75	48	202	0	59	679	Bacteria{superkingdom}(91);Proteobacteria{phylum}(91);Betaproteobacteria{class}(91);Burkholderiales{order}(91);Comamonadaceae{family}(91);Ramlibacter{genus}(91);Unassigned{species}(0)	Bacteria	Proteobacteria	Betaproteobacteria	Burkholderiales	Comamonadaceae	Ramlibacter	Unassigned
ASV1394	71	5	57	61	48	0	7	0	11	0	30	0	0	0	0	290	Bacteria{superkingdom}(82);Actinobacteria{phylum}(82);Actinobacteria{class}(82);Actinomycetales{order}(82);Microbacteriaceae{family}(82);Lysinimonas{genus}(82);uncultured_Microbacteriaceae_bacterium{species}(82)	Bacteria	Actinobacteria	Actinobacteria	Actinomycetales	Microbacteriaceae	Lysinimonas	uncultured_Microbacteriaceae_bacterium
ASV1396	17	12	0	15	0	0	0	40	31	0	0	10	14	0	14	153	Bacteria{superkingdom}(100);Chloroflexi{phylum}(100);Chloroflexia{class}(100);Kallotenuales{order}(100);Kallotenuaceae{family}(100);Kallotenue{genus}(100);Unassigned{species}(0)	Bacteria	Chloroflexi	Chloroflexia	Kallotenuales	Kallotenuaceae	Kallotenue	Unassigned
ASV1397	0	0	0	0	0	28	13	0	0	0	0	0	0	0	0	41	Bacteria{superkingdom}(100);Candidatus_Saccharibacteria{phylum}(100);{class}(100);{order}(100);{family}(100);Saccharibacteria_genera_incertae_sedis{genus}(100);Unassigned{species}(0)	Bacteria	Candidatus_Saccharibacteria				Saccharibacteria_genera_incertae_sedis	Unassigned
ASV1398	0	0	0	0	0	89	40	108	34	62	25	35	78	97	140	708	Bacteria{superkingdom}(91);Omnitrophica{phylum}(91);{class}(91);{order}(91);{family}(91);Omnitrophica_genera_incertae_sedis{genus}(91);uncultured_soil_bacterium{species}(91)	Bacteria	Omnitrophica				Omnitrophica_genera_incertae_sedis	uncultured_soil_bacterium
ASV1399	0	8	0	0	0	0	0	0	15	0	0	63	11	0	0	97	Bacteria{superkingdom}(84);Actinobacteria{phylum}(84);Actinobacteria{class}(84);Actinomycetales{order}(84);Propionibacteriaceae{family}(84);Microlunatus{genus}(84);actinobacterium_CPCC100076{species}(84)	Bacteria	Actinobacteria	Actinobacteria	Actinomycetales	Propionibacteriaceae	Microlunatus	actinobacterium_CPCC100076
ASV1400	23	0	0	21	0	0	13	75	15	106	0	19	0	114	0	386	Bacteria{superkingdom}(80);Chloroflexi{phylum}(80);Unassigned{class}(0);Unassigned{order}(0);Unassigned{family}(0);Unassigned{genus}(0);Unassigned{species}(0)	Bacteria	Chloroflexi	Unassigned	Unassigned	Unassigned	Unassigned	Unassigned
ASV1401	0	0	0	0	122	0	0	0	56	0	0	0	0	0	0	178	Bacteria{superkingdom}(80);Bacteroidetes{phylum}(80);Cytophagia{class}(80);Cytophagales{order}(80);{family}(80);Ohtaekwangia{genus}(80);uncultured_Sphingobacteriales_bacterium{species}(80)	Bacteria	Bacteroidetes	Cytophagia	Cytophagales		Ohtaekwangia	uncultured_Sphingobacteriales_bacterium
ASV1402	0	0	28	0	12	0	0	0	82	0	0	13	0	0	42	177	Bacteria{superkingdom}(99);Actinobacteria{phylum}(99);Actinobacteria{class}(99);Acidimicrobiales{order}(99);Acidimicrobineae_incertae_sedis{family}(99);Aciditerrimonas{genus}(99);Unassigned{species}(0)	Bacteria	Actinobacteria	Actinobacteria	Acidimicrobiales	Acidimicrobineae_incertae_sedis	Aciditerrimonas	Unassigned
ASV1403	0	0	0	1	19	0	0	24	0	0	0	4	0	0	0	48	Bacteria{superkingdom}(100);Verrucomicrobia{phylum}(100);Opitutae{class}(100);Opitutales{order}(100);Opitutaceae{family}(100);Opitutus{genus}(100);Unassigned{species}(0)	Bacteria	Verrucomicrobia	Opitutae	Opitutales	Opitutaceae	Opitutus	Unassigned
ASV1404	3	0	0	0	0	0	0	0	0	0	0	0	0	0	0	3	Bacteria{superkingdom}(100);Chloroflexi{phylum}(100);{class}(100);{order}(100);{family}(100);{genus}(100);uncultured_endolithic_bacterium{species}(100)	Bacteria	Chloroflexi					uncultured_endolithic_bacterium
ASV1405	0	0	66	84	131	0	0	0	0	0	10	0	0	0	0	291	Bacteria{superkingdom}(96);Candidatus_Saccharibacteria{phylum}(96);{class}(96);{order}(96);{family}(96);Saccharibacteria_genera_incertae_sedis{genus}(96);uncultured_candidate_division_TM7_bacterium{species}(96)	Bacteria	Candidatus_Saccharibacteria				Saccharibacteria_genera_incertae_sedis	uncultured_candidate_division_TM7_bacterium
ASV1406	0	0	0	0	0	0	0	0	0	89	0	174	13	21	0	297	Bacteria{superkingdom}(100);Actinobacteria{phylum}(100);Actinobacteria{class}(100);Actinomycetales{order}(100);Streptomycetaceae{family}(100);Streptomyces{genus}(100);Unassigned{species}(0)	Bacteria	Actinobacteria	Actinobacteria	Actinomycetales	Streptomycetaceae	Streptomyces	Unassigned
ASV1408	0	0	0	0	9	0	0	0	0	10	0	12	0	0	0	31	Bacteria{superkingdom}(94);Actinobacteria{phylum}(94);Actinobacteria{class}(94);Acidimicrobiales{order}(94);Acidimicrobineae_incertae_sedis{family}(94);Aciditerrimonas{genus}(94);Unassigned{species}(0)	Bacteria	Actinobacteria	Actinobacteria	Acidimicrobiales	Acidimicrobineae_incertae_sedis	Aciditerrimonas	Unassigned
ASV1409	35	0	67	0	189	0	0	43	0	111	0	0	52	0	46	543	Bacteria{superkingdom}(99);Proteobacteria{phylum}(99);Alphaproteobacteria{class}(99);Rhizobiales{order}(99);Rhizobiaceae{family}(99);Shinella{genus}(99);Unassigned{species}(0)	Bacteria	Proteobacteria	Alphaproteobacteria	Rhizobiales	Rhizobiaceae	Shinella	Unassigned
ASV1410	0	17	0	0	0	0	0	0	0	0	0	0	0	0	0	17	Bacteria{superkingdom}(90);Acidobacteria{phylum}(90);Acidobacteria_Gp4{class}(90);{order}(90);{family}(90);Gp4{genus}(90);uncultured_organism{species}(90)	Bacteria	Acidobacteria	Acidobacteria_Gp4			Gp4	uncultured_organism
ASV1413	0	0	0	0	0	0	0	25	0	23	0	0	16	0	0	64	Bacteria{superkingdom}(100);Proteobacteria{phylum}(100);Alphaproteobacteria{class}(100);Alphaproteobacteria_incertae_sedis{order}(100);{family}(100);Geminicoccus{genus}(100);Unassigned{species}(0)	Bacteria	Proteobacteria	Alphaproteobacteria	Alphaproteobacteria_incertae_sedis		Geminicoccus	Unassigned
ASV1414	0	0	0	0	0	0	0	0	0	0	0	78	58	78	0	214	Bacteria{superkingdom}(99);Acidobacteria{phylum}(99);Acidobacteria_Gp3{class}(99);{order}(99);{family}(99);Gp3{genus}(99);uncultured_Candidatus_Solibacter_sp.{species}(99)	Bacteria	Acidobacteria	Acidobacteria_Gp3			Gp3	uncultured_Candidatus_Solibacter_sp.
ASV1416	0	132	10	0	12	0	14	0	22	55	0	0	0	0	0	245	Bacteria{superkingdom}(88);Actinobacteria{phylum}(88);Actinobacteria{class}(88);Acidimicrobiales{order}(88);Acidimicrobineae_incertae_sedis{family}(88);Aciditerrimonas{genus}(88);Unassigned{species}(0)	Bacteria	Actinobacteria	Actinobacteria	Acidimicrobiales	Acidimicrobineae_incertae_sedis	Aciditerrimonas	Unassigned
ASV1417	0	0	50	66	26	30	15	0	52	85	176	280	36	150	73	1039	Bacteria{superkingdom}(89);Actinobacteria{phylum}(89);Actinobacteria{class}(89);Solirubrobacterales{order}(89);{family}(89);{genus}(89);Unassigned{species}(0)	Bacteria	Actinobacteria	Actinobacteria	Solirubrobacterales			Unassigned
ASV1418	32	0	0	5	38	0	0	0	8	0	0	0	0	0	0	83	Bacteria{superkingdom}(93);Verrucomicrobia{phylum}(93);Opitutae{class}(93);Opitutales{order}(93);Opitutaceae{family}(93);Opitutus{genus}(93);uncultured_Opitutaceae_bacterium{species}(93)	Bacteria	Verrucomicrobia	Opitutae	Opitutales	Opitutaceae	Opitutus	uncultured_Opitutaceae_bacterium
ASV1419	0	0	0	0	0	0	0	34	0	0	0	0	0	0	0	34	Bacteria{superkingdom}(100);Chloroflexi{phylum}(100);Caldilineae{class}(100);Caldilineales{order}(100);Caldilineaceae{family}(100);Litorilinea{genus}(100);Unassigned{species}(0)	Bacteria	Chloroflexi	Caldilineae	Caldilineales	Caldilineaceae	Litorilinea	Unassigned
ASV1420	0	0	0	0	0	0	0	0	0	43	0	30	0	0	0	73	Bacteria{superkingdom}(100);Proteobacteria{phylum}(100);Betaproteobacteria{class}(100);Burkholderiales{order}(100);Oxalobacteraceae{family}(100);Unassigned{genus}(0);Unassigned{species}(0)	Bacteria	Proteobacteria	Betaproteobacteria	Burkholderiales	Oxalobacteraceae	Unassigned	Unassigned
ASV1421	0	88	16	0	0	0	0	0	0	0	0	0	0	0	0	104	Bacteria{superkingdom}(94);Chloroflexi{phylum}(94);{class}(94);{order}(94);{family}(94);{genus}(94);Unassigned{species}(0)	Bacteria	Chloroflexi					Unassigned
ASV1422	0	0	29	0	19	0	4	0	0	9	0	0	0	0	0	61	Bacteria{superkingdom}(99);Chloroflexi{phylum}(99);Anaerolineae{class}(99);Anaerolineales{order}(99);Anaerolineaceae{family}(99);{genus}(99);Unassigned{species}(0)	Bacteria	Chloroflexi	Anaerolineae	Anaerolineales	Anaerolineaceae		Unassigned
ASV1423	17	0	53	28	0	20	0	25	0	30	0	0	0	0	0	173	Bacteria{superkingdom}(100);Chloroflexi{phylum}(100);Chloroflexia{class}(100);Kallotenuales{order}(100);Kallotenuaceae{family}(100);Kallotenue{genus}(100);uncultured_bacterium{species}(100)	Bacteria	Chloroflexi	Chloroflexia	Kallotenuales	Kallotenuaceae	Kallotenue	uncultured_bacterium
ASV1424	0	0	0	0	0	0	0	0	0	52	0	0	86	39	0	177	Bacteria{superkingdom}(100);Bacteroidetes{phylum}(100);Sphingobacteriia{class}(100);Sphingobacteriales{order}(100);Chitinophagaceae{family}(100);Segetibacter{genus}(100);Unassigned{species}(0)	Bacteria	Bacteroidetes	Sphingobacteriia	Sphingobacteriales	Chitinophagaceae	Segetibacter	Unassigned
ASV1425	116	0	17	30	0	0	10	9	0	0	0	0	0	0	0	182	Bacteria{superkingdom}(100);Proteobacteria{phylum}(100);Alphaproteobacteria{class}(100);{order}(100);{family}(100);{genus}(100);Unassigned{species}(0)	Bacteria	Proteobacteria	Alphaproteobacteria				Unassigned
ASV1427	25	0	19	32	173	53	63	19	23	45	0	0	0	0	14	466	Bacteria{superkingdom}(100);Bacteroidetes{phylum}(100);Sphingobacteriia{class}(100);Sphingobacteriales{order}(100);Chitinophagaceae{family}(100);Unassigned{genus}(0);Unassigned{species}(0)	Bacteria	Bacteroidetes	Sphingobacteriia	Sphingobacteriales	Chitinophagaceae	Unassigned	Unassigned
ASV1429	0	0	0	11	4	0	0	0	0	23	0	36	18	23	24	139	Bacteria{superkingdom}(99);Proteobacteria{phylum}(99);Alphaproteobacteria{class}(99);Rhodospirillales{order}(99);{family}(99);{genus}(99);Unassigned{species}(0)	Bacteria	Proteobacteria	Alphaproteobacteria	Rhodospirillales			Unassigned
ASV1430	0	3	2	40	0	0	0	0	0	0	0	0	0	0	0	45	Bacteria{superkingdom}(100);Proteobacteria{phylum}(100);Alphaproteobacteria{class}(100);Rhizobiales{order}(100);Bradyrhizobiaceae{family}(100);Bosea{genus}(100);Unassigned{species}(0)	Bacteria	Proteobacteria	Alphaproteobacteria	Rhizobiales	Bradyrhizobiaceae	Bosea	Unassigned
ASV1431	0	0	0	22	0	51	0	72	0	63	0	0	0	0	0	208	Bacteria{superkingdom}(100);Actinobacteria{phylum}(100);Unassigned{class}(0);Unassigned{order}(0);Unassigned{family}(0);Unassigned{genus}(0);Unassigned{species}(0)	Bacteria	Actinobacteria	Unassigned	Unassigned	Unassigned	Unassigned	Unassigned
ASV1432	20	19	23	0	42	48	43	34	12	78	18	14	0	23	16	390	Bacteria{superkingdom}(100);Proteobacteria{phylum}(100);Alphaproteobacteria{class}(100);Rhizobiales{order}(100);Hyphomicrobiaceae{family}(100);Pedomicrobium{genus}(100);Unassigned{species}(0)	Bacteria	Proteobacteria	Alphaproteobacteria	Rhizobiales	Hyphomicrobiaceae	Pedomicrobium	Unassigned
ASV1433	0	55	43	0	0	19	12	49	0	0	0	0	0	0	0	178	Bacteria{superkingdom}(91);Proteobacteria{phylum}(91);Gammaproteobacteria{class}(91);Chromatiales{order}(91);Unassigned{family}(0);Unassigned{genus}(0);Unassigned{species}(0)	Bacteria	Proteobacteria	Gammaproteobacteria	Chromatiales	Unassigned	Unassigned	Unassigned
ASV1434	0	0	20	34	0	0	0	0	10	0	0	0	601	0	0	665	Bacteria{superkingdom}(100);Actinobacteria{phylum}(100);Actinobacteria{class}(100);Actinomycetales{order}(100);Unassigned{family}(0);Unassigned{genus}(0);Unassigned{species}(0)	Bacteria	Actinobacteria	Actinobacteria	Actinomycetales	Unassigned	Unassigned	Unassigned
ASV1435	0	0	0	0	0	0	0	0	0	0	0	45	0	0	21	66	Bacteria{superkingdom}(82);Proteobacteria{phylum}(82);Alphaproteobacteria{class}(82);Rhodospirillales{order}(82);Acetobacteraceae{family}(82);Belnapia{genus}(82);Unassigned{species}(0)	Bacteria	Proteobacteria	Alphaproteobacteria	Rhodospirillales	Acetobacteraceae	Belnapia	Unassigned
ASV1436	0	0	0	1	0	0	0	0	8	0	0	13	0	0	0	22	Bacteria{superkingdom}(84);Actinobacteria{phylum}(84);Actinobacteria{class}(84);Solirubrobacterales{order}(84);Solirubrobacteraceae{family}(84);Solirubrobacter{genus}(84);uncultured_bacterium{species}(84)	Bacteria	Actinobacteria	Actinobacteria	Solirubrobacterales	Solirubrobacteraceae	Solirubrobacter	uncultured_bacterium
ASV1438	0	0	0	0	17	0	0	0	0	13	0	0	0	0	0	30	Bacteria{superkingdom}(100);Proteobacteria{phylum}(100);Alphaproteobacteria{class}(100);Rhizobiales{order}(100);{family}(100);{genus}(100);uncultured_endolithic_bacterium{species}(100)	Bacteria	Proteobacteria	Alphaproteobacteria	Rhizobiales			uncultured_endolithic_bacterium
ASV1439	42	0	28	42	60	15	0	19	0	0	0	35	0	0	9	250	Bacteria{superkingdom}(100);Armatimonadetes{phylum}(100);{class}(100);{order}(100);{family}(100);Armatimonadetes_gp5{genus}(100);Unassigned{species}(0)	Bacteria	Armatimonadetes				Armatimonadetes_gp5	Unassigned
ASV1440	270	67	113	191	644	0	0	0	0	0	0	0	0	0	56	1341	Bacteria{superkingdom}(100);Verrucomicrobia{phylum}(100);Opitutae{class}(100);Opitutales{order}(100);Opitutaceae{family}(100);Opitutus{genus}(100);Unassigned{species}(0)	Bacteria	Verrucomicrobia	Opitutae	Opitutales	Opitutaceae	Opitutus	Unassigned
ASV1441	42	0	147	0	30	0	31	84	31	0	0	0	0	0	0	365	Bacteria{superkingdom}(100);Actinobacteria{phylum}(100);Actinobacteria{class}(100);Gaiellales{order}(100);Gaiellaceae{family}(100);Gaiella{genus}(100);Unassigned{species}(0)	Bacteria	Actinobacteria	Actinobacteria	Gaiellales	Gaiellaceae	Gaiella	Unassigned
ASV1442	29	0	22	56	49	0	0	0	0	23	0	35	0	0	0	214	Bacteria{superkingdom}(88);Proteobacteria{phylum}(88);Alphaproteobacteria{class}(88);Rhizobiales{order}(88);Hyphomicrobiaceae{family}(88);Blastochloris{genus}(88);uncultured_alpha_proteobacterium{species}(88)	Bacteria	Proteobacteria	Alphaproteobacteria	Rhizobiales	Hyphomicrobiaceae	Blastochloris	uncultured_alpha_proteobacterium
ASV1443	0	0	18	41	0	34	9	26	39	25	127	32	62	69	43	525	Bacteria{superkingdom}(100);Acidobacteria{phylum}(100);Acidobacteria_Gp6{class}(100);{order}(100);{family}(100);Gp6{genus}(100);Unassigned{species}(0)	Bacteria	Acidobacteria	Acidobacteria_Gp6			Gp6	Unassigned
ASV1444	0	5	0	0	0	0	0	0	0	0	0	0	0	0	0	5	Bacteria{superkingdom}(92);Armatimonadetes{phylum}(92);{class}(92);{order}(92);{family}(92);Armatimonadetes_gp4{genus}(92);uncultured_bacterium{species}(92)	Bacteria	Armatimonadetes				Armatimonadetes_gp4	uncultured_bacterium
ASV1445	0	0	0	0	0	0	0	0	0	0	0	18	0	0	0	18	Bacteria{superkingdom}(97);Proteobacteria{phylum}(97);Alphaproteobacteria{class}(97);Rhizobiales{order}(97);Phyllobacteriaceae{family}(97);{genus}(97);Unassigned{species}(0)	Bacteria	Proteobacteria	Alphaproteobacteria	Rhizobiales	Phyllobacteriaceae		Unassigned
ASV1446	82	0	39	0	0	0	0	0	0	0	0	0	0	0	0	121	Bacteria{superkingdom}(100);Actinobacteria{phylum}(100);Actinobacteria{class}(100);Gaiellales{order}(100);Gaiellaceae{family}(100);Gaiella{genus}(100);Unassigned{species}(0)	Bacteria	Actinobacteria	Actinobacteria	Gaiellales	Gaiellaceae	Gaiella	Unassigned
ASV1447	35	0	36	148	0	0	0	0	27	0	0	0	0	0	49	295	Bacteria{superkingdom}(84);Bacteroidetes{phylum}(84);Sphingobacteriia{class}(84);Sphingobacteriales{order}(84);Chitinophagaceae{family}(84);Niastella{genus}(84);uncultured_bacterium{species}(84)	Bacteria	Bacteroidetes	Sphingobacteriia	Sphingobacteriales	Chitinophagaceae	Niastella	uncultured_bacterium
ASV1448	57	0	0	0	0	0	0	0	0	0	0	0	0	0	0	57	Bacteria{superkingdom}(100);Proteobacteria{phylum}(100);Alphaproteobacteria{class}(100);Rhizobiales{order}(100);Rhodobiaceae{family}(100);Unassigned{genus}(0);Unassigned{species}(0)	Bacteria	Proteobacteria	Alphaproteobacteria	Rhizobiales	Rhodobiaceae	Unassigned	Unassigned
ASV1449	0	0	0	0	0	0	0	0	0	12	0	38	21	16	0	87	Bacteria{superkingdom}(99);Armatimonadetes{phylum}(99);{class}(99);{order}(99);{family}(99);Armatimonadetes_gp4{genus}(99);uncultured_Firmicutes_bacterium{species}(99)	Bacteria	Armatimonadetes				Armatimonadetes_gp4	uncultured_Firmicutes_bacterium
ASV1453	0	0	0	0	0	0	0	0	0	12	0	33	0	33	0	78	Bacteria{superkingdom}(100);Actinobacteria{phylum}(100);Actinobacteria{class}(100);Actinomycetales{order}(100);Nocardioidaceae{family}(100);Nocardioides{genus}(100);Unassigned{species}(0)	Bacteria	Actinobacteria	Actinobacteria	Actinomycetales	Nocardioidaceae	Nocardioides	Unassigned
ASV1454	22	0	50	15	117	14	0	41	0	0	242	17	0	0	141	659	Bacteria{superkingdom}(92);Ignavibacteriae{phylum}(92);Ignavibacteria{class}(92);Ignavibacteriales{order}(92);Ignavibacteriaceae{family}(92);{genus}(92);uncultured_soil_bacterium{species}(92)	Bacteria	Ignavibacteriae	Ignavibacteria	Ignavibacteriales	Ignavibacteriaceae		uncultured_soil_bacterium
ASV1455	33	0	12	0	49	0	0	0	0	0	0	0	0	0	0	94	Bacteria{superkingdom}(97);Bacteroidetes{phylum}(97);Cytophagia{class}(97);Cytophagales{order}(97);{family}(97);Chryseolinea{genus}(97);Unassigned{species}(0)	Bacteria	Bacteroidetes	Cytophagia	Cytophagales		Chryseolinea	Unassigned
ASV1456	229	0	298	108	182	0	0	0	68	0	125	0	0	0	79	1089	Bacteria{superkingdom}(100);Actinobacteria{phylum}(100);Actinobacteria{class}(100);Acidimicrobiales{order}(100);Unassigned{family}(0);Unassigned{genus}(0);Unassigned{species}(0)	Bacteria	Actinobacteria	Actinobacteria	Acidimicrobiales	Unassigned	Unassigned	Unassigned
ASV1458	16	0	0	34	25	13	25	70	0	51	119	29	0	31	51	464	Bacteria{superkingdom}(83);Acidobacteria{phylum}(83);Acidobacteria_Gp3{class}(83);{order}(83);{family}(83);Gp3{genus}(83);Unassigned{species}(0)	Bacteria	Acidobacteria	Acidobacteria_Gp3			Gp3	Unassigned
ASV1459	0	0	0	0	0	0	0	0	0	5	0	10	7	22	0	44	Bacteria{superkingdom}(100);candidate_division_WPS-1{phylum}(100);{class}(100);{order}(100);{family}(100);WPS-1_genera_incertae_sedis{genus}(100);Unassigned{species}(0)	Bacteria	candidate_division_WPS-1				WPS-1_genera_incertae_sedis	Unassigned
[truncated: 16,793 more rows]
