# Supplementary material for: Years of sand fixation with Caragana korshinskii drive the enrichment of its rhizosphere functional microbes by accumulating soil N
Source: PeerJ journal article supplement (doi:10.7717/peerj.14271), 2022-11-01
Supplement: ASV_of_fungi_in_fall.xlsx [file ASV_of_fungi_in_fall.xlsx]

## Sheet: OTU
#OTU ID	Ck18-1	Ck18-2	Ck18-3	Ck18-4	Ck18-5	Ck18-6	Ck12-1	Ck12-2	Ck12-3	Ck12-4	Ck12-5	Ck12-6	Ck6-1	Ck6-2	Ck6-3	Ck6-4	Ck6-5	OTUsize	Taxonomy	superkingdom	phylum	class	order	family	genus	species
ASV1	24498	293	12288	25297	8917	41197	1484	7166	28883	7803	1595	3381	16325	21864	67	307	0	201365	Fungi{superkingdom}(77);Ascomycota{phylum}(77);Eurotiomycetes{class}(77);Eurotiales{order}(77);Aspergillaceae{family}(77);Penicillium{genus}(77);Penicillium_griseofulvum{species}(77)	Fungi	Ascomycota	Eurotiomycetes	Eurotiales	Aspergillaceae	Penicillium	Penicillium_griseofulvum
ASV2	11245	10424	10115	2648	5347	3525	4347	16783	15723	1249	87	552	3757	455	30	238	276	86801	Fungi{superkingdom}(89);Ascomycota{phylum}(89);Sordariomycetes{class}(89);Hypocreales{order}(89);Nectriaceae{family}(89);Fusarium{genus}(89);Fusarium_solani{species}(89)	Fungi	Ascomycota	Sordariomycetes	Hypocreales	Nectriaceae	Fusarium	Fusarium_solani
ASV3	2708	671	45	3461	218	2287	329	0	0	2116	0	0	3792	313	0	20598	0	36538	Fungi{superkingdom}(97);Ascomycota{phylum}(97);Sordariomycetes{class}(97);Hypocreales{order}(97);Nectriaceae{family}(97);Fusarium{genus}(97);Unassigned{species}(0)	Fungi	Ascomycota	Sordariomycetes	Hypocreales	Nectriaceae	Fusarium	Unassigned
ASV4	7737	738	16263	3847	3986	2395	1511	54	0	2048	26	1098	25265	942	0	1905	0	67815	Fungi{superkingdom}(98);Ascomycota{phylum}(98);Sordariomycetes{class}(98);Hypocreales{order}(98);Nectriaceae{family}(98);Fusarium{genus}(98);Fusarium_solani{species}(98)	Fungi	Ascomycota	Sordariomycetes	Hypocreales	Nectriaceae	Fusarium	Fusarium_solani
ASV5	199	42	0	0	0	0	2	0	0	0	11	0	2	0	0	29	0	285	Fungi{superkingdom}(100);Basidiomycota{phylum}(100);Agaricomycetes{class}(100);Agaricales{order}(100);Omphalotaceae{family}(100);Marasmiellus{genus}(100);Marasmiellus_mesosporus{species}(100)	Fungi	Basidiomycota	Agaricomycetes	Agaricales	Omphalotaceae	Marasmiellus	Marasmiellus_mesosporus
ASV6	314	0	1436	10123	514	3986	471	0	0	3036	1579	1482	0	6204	0	3183	128	32456	Fungi{superkingdom}(78);Ascomycota{phylum}(78);Eurotiomycetes{class}(78);Eurotiales{order}(78);Aspergillaceae{family}(78);Penicillium{genus}(78);Penicillium_griseofulvum{species}(78)	Fungi	Ascomycota	Eurotiomycetes	Eurotiales	Aspergillaceae	Penicillium	Penicillium_griseofulvum
ASV7	195	1848	184	2987	697	238	0	0	21	304	83	940	0	116	58	50	0	7721	Fungi{superkingdom}(93);Ascomycota{phylum}(93);Dothideomycetes{class}(93);Pleosporales{order}(93);Didymellaceae{family}(93);Nothophoma{genus}(93);Nothophoma_variabilis{species}(93)	Fungi	Ascomycota	Dothideomycetes	Pleosporales	Didymellaceae	Nothophoma	Nothophoma_variabilis
ASV8	1060	4859	4522	3334	1529	1657	1401	15	0	43	134	13	12525	0	0	902	0	31994	Fungi{superkingdom}(98);Ascomycota{phylum}(98);Sordariomycetes{class}(98);Hypocreales{order}(98);Nectriaceae{family}(98);Fusarium{genus}(98);Fusarium_solani{species}(98)	Fungi	Ascomycota	Sordariomycetes	Hypocreales	Nectriaceae	Fusarium	Fusarium_solani
ASV9	0	0	0	47	0	0	0	0	0	1911	6	29	0	0	0	0	0	1993	Fungi{superkingdom}(83);Ascomycota{phylum}(83);Eurotiomycetes{class}(83);Eurotiales{order}(83);Trichocomaceae{family}(83);Talaromyces{genus}(83);Talaromyces_aculeatus{species}(83)	Fungi	Ascomycota	Eurotiomycetes	Eurotiales	Trichocomaceae	Talaromyces	Talaromyces_aculeatus
ASV10	1167	586	10028	440	1223	1088	0	2644	0	863	0	0	0	0	0	3781	0	21820	Fungi{superkingdom}(99);Ascomycota{phylum}(99);Sordariomycetes{class}(99);Hypocreales{order}(99);Nectriaceae{family}(99);Fusarium{genus}(99);Fusarium_solani{species}(99)	Fungi	Ascomycota	Sordariomycetes	Hypocreales	Nectriaceae	Fusarium	Fusarium_solani
ASV11	0	2338	0	247	215	152	0	0	0	0	3	101	0	500	0	960	0	4516	Fungi{superkingdom}(87);Ascomycota{phylum}(87);Dothideomycetes{class}(87);Pleosporales{order}(87);Pleosporales_fam_Incertae_sedis{family}(87);Thyrostroma{genus}(87);Thyrostroma_cornicola{species}(87)	Fungi	Ascomycota	Dothideomycetes	Pleosporales	Pleosporales_fam_Incertae_sedis	Thyrostroma	Thyrostroma_cornicola
ASV12	0	39	0	18	46	0	0	0	19	0	0	336	0	0	0	0	0	458	Fungi{superkingdom}(98);Ascomycota{phylum}(98);Eurotiomycetes{class}(98);Eurotiales{order}(98);Aspergillaceae{family}(98);Aspergillus{genus}(98);Aspergillus_pseudodeflectus{species}(98)	Fungi	Ascomycota	Eurotiomycetes	Eurotiales	Aspergillaceae	Aspergillus	Aspergillus_pseudodeflectus
ASV13	298	518	99	299	437	125	0	0	90	0	0	36	0	0	249	47	0	2198	Fungi{superkingdom}(88);Ascomycota{phylum}(88);Dothideomycetes{class}(88);Pleosporales{order}(88);Pleosporaceae{family}(88);Alternaria{genus}(88);Alternaria_alternata{species}(88)	Fungi	Ascomycota	Dothideomycetes	Pleosporales	Pleosporaceae	Alternaria	Alternaria_alternata
ASV14	0	0	0	0	0	0	0	0	0	0	0	0	0	0	0	0	48456	48456	Fungi{superkingdom}(81);Basidiomycota{phylum}(81);Agaricomycetes{class}(81);Agaricales{order}(81);unidentified{family}(81);unidentified{genus}(81);unidentified{species}(81)	Fungi	Basidiomycota	Agaricomycetes	Agaricales	unidentified	unidentified	unidentified
ASV15	24	198	26	21	0	10	0	16	0	0	59	0	0	0	15	0	0	369	Fungi{superkingdom}(100);Unassigned{phylum}(0);Unassigned{class}(0);Unassigned{order}(0);Unassigned{family}(0);Unassigned{genus}(0);Unassigned{species}(0)	Fungi	Unassigned	Unassigned	Unassigned	Unassigned	Unassigned	Unassigned
ASV16	0	0	0	0	0	0	0	21	0	0	0	0	0	0	0	0	0	21	Fungi{superkingdom}(70);Ascomycota{phylum}(70);Sordariomycetes{class}(70);Unassigned{order}(0);Unassigned{family}(0);Unassigned{genus}(0);Unassigned{species}(0)	Fungi	Ascomycota	Sordariomycetes	Unassigned	Unassigned	Unassigned	Unassigned
ASV17	0	0	0	0	0	0	0	0	0	0	57	68	8	0	26	0	15	174	Fungi{superkingdom}(100);Ascomycota{phylum}(100);Eurotiomycetes{class}(100);Eurotiales{order}(100);Aspergillaceae{family}(100);Penicillium{genus}(100);Unassigned{species}(0)	Fungi	Ascomycota	Eurotiomycetes	Eurotiales	Aspergillaceae	Penicillium	Unassigned
ASV18	0	0	0	38	4363	7	381	2550	967	7857	53	2080	0	0	0	220	0	18516	Fungi{superkingdom}(100);Basidiomycota{phylum}(100);Agaricomycetes{class}(100);Agaricales{order}(100);Tricholomataceae{family}(100);Melanoleuca{genus}(100);Melanoleuca_griseobrunnea{species}(100)	Fungi	Basidiomycota	Agaricomycetes	Agaricales	Tricholomataceae	Melanoleuca	Melanoleuca_griseobrunnea
ASV19	43	77	0	138	89	0	0	0	0	505	0	1033	40	1169	858	821	0	4773	Fungi{superkingdom}(70);Ascomycota{phylum}(70);Sordariomycetes{class}(70);Hypocreales{order}(70);Nectriaceae{family}(70);Gibberella{genus}(70);Gibberella_intricans{species}(70)	Fungi	Ascomycota	Sordariomycetes	Hypocreales	Nectriaceae	Gibberella	Gibberella_intricans
ASV20	0	0	11	4	0	0	0	0	0	0	0	0	0	0	0	0	0	15	Fungi{superkingdom}(100);Unassigned{phylum}(0);Unassigned{class}(0);Unassigned{order}(0);Unassigned{family}(0);Unassigned{genus}(0);Unassigned{species}(0)	Fungi	Unassigned	Unassigned	Unassigned	Unassigned	Unassigned	Unassigned
ASV21	0	0	111	856	343	1116	0	0	0	0	0	0	0	0	0	0	4	2430	Fungi{superkingdom}(79);Basidiomycota{phylum}(79);Agaricomycetes{class}(79);Sebacinales{order}(79);unidentified{family}(79);unidentified{genus}(79);unidentified{species}(79)	Fungi	Basidiomycota	Agaricomycetes	Sebacinales	unidentified	unidentified	unidentified
ASV23	0	0	0	0	0	0	0	36	0	0	0	0	0	0	0	0	0	36	Fungi{superkingdom}(61);Ascomycota{phylum}(61);Sordariomycetes{class}(61);unidentified{order}(61);unidentified{family}(61);unidentified{genus}(61);unidentified{species}(61)	Fungi	Ascomycota	Sordariomycetes	unidentified	unidentified	unidentified	unidentified
ASV24	0	4012	200	124	631	0	50	1315	1498	1241	0	626	0	0	2959	0	0	12656	Fungi{superkingdom}(100);Ascomycota{phylum}(100);Dothideomycetes{class}(100);Pleosporales{order}(100);Phaeosphaeriaceae{family}(100);Paraphoma{genus}(100);Paraphoma_radicina{species}(100)	Fungi	Ascomycota	Dothideomycetes	Pleosporales	Phaeosphaeriaceae	Paraphoma	Paraphoma_radicina
ASV25	0	0	989	0	231	0	0	10	0	2752	0	0	0	0	0	377	14961	19320	Fungi{superkingdom}(100);Unassigned{phylum}(0);Unassigned{class}(0);Unassigned{order}(0);Unassigned{family}(0);Unassigned{genus}(0);Unassigned{species}(0)	Fungi	Unassigned	Unassigned	Unassigned	Unassigned	Unassigned	Unassigned
ASV26	0	0	49	45	12507	50	0	0	0	0	0	0	0	23	0	12374	0	25048	Fungi{superkingdom}(84);Basidiomycota{phylum}(84);Agaricomycetes{class}(84);Agaricales{order}(84);unidentified{family}(84);unidentified{genus}(84);unidentified{species}(84)	Fungi	Basidiomycota	Agaricomycetes	Agaricales	unidentified	unidentified	unidentified
ASV27	60	155	0	19	0	0	0	0	0	995	0	233	0	113	237	907	0	2719	Fungi{superkingdom}(83);Ascomycota{phylum}(83);Sordariomycetes{class}(83);Hypocreales{order}(83);Nectriaceae{family}(83);Gibberella{genus}(83);Gibberella_avenacea{species}(83)	Fungi	Ascomycota	Sordariomycetes	Hypocreales	Nectriaceae	Gibberella	Gibberella_avenacea
ASV28	0	0	0	0	0	0	0	0	0	0	2	0	0	0	0	0	0	2	Fungi{superkingdom}(100);Ascomycota{phylum}(100);Sordariomycetes{class}(100);Togniniales{order}(100);Togniniaceae{family}(100);Phaeoacremonium{genus}(100);Phaeoacremonium_rubrigenum{species}(100)	Fungi	Ascomycota	Sordariomycetes	Togniniales	Togniniaceae	Phaeoacremonium	Phaeoacremonium_rubrigenum
ASV29	2008	3463	1225	0	3851	808	49	0	0	0	0	0	0	0	0	0	0	11404	Fungi{superkingdom}(99);Ascomycota{phylum}(99);Leotiomycetes{class}(99);Helotiales{order}(99);Unassigned{family}(0);Unassigned{genus}(0);Unassigned{species}(0)	Fungi	Ascomycota	Leotiomycetes	Helotiales	Unassigned	Unassigned	Unassigned
ASV30	7	0	4	70	55	0	0	0	0	0	0	0	95	0	0	2	0	233	Fungi{superkingdom}(100);Unassigned{phylum}(0);Unassigned{class}(0);Unassigned{order}(0);Unassigned{family}(0);Unassigned{genus}(0);Unassigned{species}(0)	Fungi	Unassigned	Unassigned	Unassigned	Unassigned	Unassigned	Unassigned
ASV31	0	0	0	0	0	0	0	3759	6544	0	273	782	0	0	6244	0	0	17602	Fungi{superkingdom}(92);Ascomycota{phylum}(92);Sordariomycetes{class}(92);Hypocreales{order}(92);Nectriaceae{family}(92);Fusarium{genus}(92);Fusarium_hostae{species}(92)	Fungi	Ascomycota	Sordariomycetes	Hypocreales	Nectriaceae	Fusarium	Fusarium_hostae
ASV32	0	180	756	2141	0	0	0	0	0	0	0	0	0	0	0	0	0	3077	Fungi{superkingdom}(100);Ascomycota{phylum}(100);Sordariomycetes{class}(100);Branch06{order}(100);unidentified{family}(100);unidentified{genus}(100);unidentified{species}(100)	Fungi	Ascomycota	Sordariomycetes	Branch06	unidentified	unidentified	unidentified
ASV33	0	0	0	6	51	3	0	42	0	449	0	74	0	2877	6632	1412	399	11945	Fungi{superkingdom}(75);Ascomycota{phylum}(75);Sordariomycetes{class}(75);Hypocreales{order}(75);Stachybotryaceae{family}(75);Albifimbria{genus}(75);Albifimbria_verrucaria{species}(75)	Fungi	Ascomycota	Sordariomycetes	Hypocreales	Stachybotryaceae	Albifimbria	Albifimbria_verrucaria
ASV34	0	0	19	11	5	0	0	0	0	0	3	13	0	674	0	0	19	744	Fungi{superkingdom}(100);Unassigned{phylum}(0);Unassigned{class}(0);Unassigned{order}(0);Unassigned{family}(0);Unassigned{genus}(0);Unassigned{species}(0)	Fungi	Unassigned	Unassigned	Unassigned	Unassigned	Unassigned	Unassigned
ASV35	7	0	272	11	8	1260	518	0	0	0	0	5063	0	39	28	0	0	7206	Fungi{superkingdom}(66);Ascomycota{phylum}(66);Unassigned{class}(0);Unassigned{order}(0);Unassigned{family}(0);Unassigned{genus}(0);Unassigned{species}(0)	Fungi	Ascomycota	Unassigned	Unassigned	Unassigned	Unassigned	Unassigned
ASV36	0	0	0	0	15	5	0	0	0	0	2	0	0	0	0	0	0	22	Fungi{superkingdom}(100);Basidiomycota{phylum}(100);Agaricomycetes{class}(100);Polyporales{order}(100);Meruliaceae{family}(100);Hydnophlebia{genus}(100);Hydnophlebia_omnivora{species}(100)	Fungi	Basidiomycota	Agaricomycetes	Polyporales	Meruliaceae	Hydnophlebia	Hydnophlebia_omnivora
ASV38	0	29	0	4	4	16	0	0	0	0	0	0	0	0	0	0	0	53	Fungi{superkingdom}(89);Basidiomycota{phylum}(89);Agaricomycetes{class}(89);Agaricales{order}(89);Omphalotaceae{family}(89);Marasmiellus{genus}(89);Marasmiellus_paspali{species}(89)	Fungi	Basidiomycota	Agaricomycetes	Agaricales	Omphalotaceae	Marasmiellus	Marasmiellus_paspali
ASV39	129	0	55	16	70	88	0	0	0	0	0	0	0	0	0	0	0	358	Fungi{superkingdom}(100);Unassigned{phylum}(0);Unassigned{class}(0);Unassigned{order}(0);Unassigned{family}(0);Unassigned{genus}(0);Unassigned{species}(0)	Fungi	Unassigned	Unassigned	Unassigned	Unassigned	Unassigned	Unassigned
ASV40	0	0	135	246	0	0	0	182	0	0	0	0	0	0	0	0	0	563	Fungi{superkingdom}(63);Basidiomycota{phylum}(63);Agaricomycetes{class}(63);Unassigned{order}(0);Unassigned{family}(0);Unassigned{genus}(0);Unassigned{species}(0)	Fungi	Basidiomycota	Agaricomycetes	Unassigned	Unassigned	Unassigned	Unassigned
ASV41	7	0	0	0	23	52	0	0	0	0	0	0	0	0	0	0	0	82	Fungi{superkingdom}(100);Ascomycota{phylum}(100);Sordariomycetes{class}(100);Hypocreales{order}(100);Hypocreales_fam_Incertae_sedis{family}(100);Acremonium{genus}(100);Acremonium_persicinum{species}(100)	Fungi	Ascomycota	Sordariomycetes	Hypocreales	Hypocreales_fam_Incertae_sedis	Acremonium	Acremonium_persicinum
ASV42	59	0	26	31	0	0	0	0	0	38	0	0	0	0	0	0	0	154	Fungi{superkingdom}(100);Calcarisporiellomycota{phylum}(100);Calcarisporiellomycetes{class}(100);Calcarisporiellales{order}(100);Calcarisporiellaceae{family}(100);Calcarisporiella{genus}(100);Calcarisporiella_thermophila{species}(100)	Fungi	Calcarisporiellomycota	Calcarisporiellomycetes	Calcarisporiellales	Calcarisporiellaceae	Calcarisporiella	Calcarisporiella_thermophila
ASV43	35	168	64	19	43	17	0	0	15	0	42	319	0	0	418	12	0	1152	Fungi{superkingdom}(88);Ascomycota{phylum}(88);Dothideomycetes{class}(88);Capnodiales{order}(88);Cladosporiaceae{family}(88);Cladosporium{genus}(88);Cladosporium_tenuissimum{species}(88)	Fungi	Ascomycota	Dothideomycetes	Capnodiales	Cladosporiaceae	Cladosporium	Cladosporium_tenuissimum
ASV45	16	0	0	86	0	39	0	3439	381	853	0	7154	0	0	0	0	0	11968	Fungi{superkingdom}(100);Unassigned{phylum}(0);Unassigned{class}(0);Unassigned{order}(0);Unassigned{family}(0);Unassigned{genus}(0);Unassigned{species}(0)	Fungi	Unassigned	Unassigned	Unassigned	Unassigned	Unassigned	Unassigned
ASV46	177	1769	0	0	0	0	0	0	0	0	0	0	0	0	0	0	0	1946	Fungi{superkingdom}(100);Ascomycota{phylum}(100);Sordariomycetes{class}(100);Branch06{order}(100);unidentified{family}(100);unidentified{genus}(100);unidentified{species}(100)	Fungi	Ascomycota	Sordariomycetes	Branch06	unidentified	unidentified	unidentified
ASV48	24	51	58	395	126	369	0	64	1368	300	79	59	780	0	254	659	142	4728	Fungi{superkingdom}(100);Ascomycota{phylum}(100);Sordariomycetes{class}(100);Hypocreales{order}(100);Hypocreales_fam_Incertae_sedis{family}(100);Sarocladium{genus}(100);Sarocladium_kiliense{species}(100)	Fungi	Ascomycota	Sordariomycetes	Hypocreales	Hypocreales_fam_Incertae_sedis	Sarocladium	Sarocladium_kiliense
ASV49	140	197	90	0	29	0	0	0	0	0	0	390	0	0	0	0	0	846	Fungi{superkingdom}(100);Mortierellomycota{phylum}(100);Mortierellomycetes{class}(100);Mortierellales{order}(100);Mortierellaceae{family}(100);Mortierella{genus}(100);Unassigned{species}(0)	Fungi	Mortierellomycota	Mortierellomycetes	Mortierellales	Mortierellaceae	Mortierella	Unassigned
ASV50	0	0	5	4	0	0	0	0	0	0	0	0	0	0	0	0	0	9	Fungi{superkingdom}(100);Ascomycota{phylum}(100);Pezizomycetes{class}(100);Pezizales{order}(100);Pezizaceae{family}(100);Mattirolomyces{genus}(100);Mattirolomyces_spinosus{species}(100)	Fungi	Ascomycota	Pezizomycetes	Pezizales	Pezizaceae	Mattirolomyces	Mattirolomyces_spinosus
ASV51	0	0	0	0	0	0	258	0	84	231	0	1975	0	0	0	0	0	2548	Fungi{superkingdom}(77);Ascomycota{phylum}(77);Eurotiomycetes{class}(77);Eurotiales{order}(77);Aspergillaceae{family}(77);Aspergillus{genus}(77);Aspergillus_felis{species}(77)	Fungi	Ascomycota	Eurotiomycetes	Eurotiales	Aspergillaceae	Aspergillus	Aspergillus_felis
ASV52	0	19	0	40	0	14	0	0	0	0	0	174	0	0	0	0	0	247	Fungi{superkingdom}(95);Ascomycota{phylum}(95);Dothideomycetes{class}(95);Pleosporales{order}(95);Dictyosporiaceae{family}(95);Pseudocoleophoma{genus}(95);Pseudocoleophoma_bauhiniae{species}(95)	Fungi	Ascomycota	Dothideomycetes	Pleosporales	Dictyosporiaceae	Pseudocoleophoma	Pseudocoleophoma_bauhiniae
ASV53	77	777	154	190	69	43	67	46	717	2530	151	177	179	1675	1013	80	8	7953	Fungi{superkingdom}(100);Ascomycota{phylum}(100);Sordariomycetes{class}(100);Hypocreales{order}(100);Ophiocordycipitaceae{family}(100);unidentified{genus}(100);unidentified{species}(100)	Fungi	Ascomycota	Sordariomycetes	Hypocreales	Ophiocordycipitaceae	unidentified	unidentified
ASV54	0	17	0	0	0	0	29	0	0	0	0	112	0	0	0	77	0	235	Fungi{superkingdom}(100);Ascomycota{phylum}(100);Sordariomycetes{class}(100);Hypocreales{order}(100);Cordycipitaceae{family}(100);Beauveria{genus}(100);Beauveria_amorpha{species}(100)	Fungi	Ascomycota	Sordariomycetes	Hypocreales	Cordycipitaceae	Beauveria	Beauveria_amorpha
ASV55	16	0	183	67	15	0	0	0	0	0	0	0	0	0	0	0	0	281	Fungi{superkingdom}(99);Ascomycota{phylum}(99);Sordariomycetes{class}(99);Sordariales{order}(99);Chaetomiaceae{family}(99);Zopfiella{genus}(99);unidentified{species}(99)	Fungi	Ascomycota	Sordariomycetes	Sordariales	Chaetomiaceae	Zopfiella	unidentified
ASV56	0	0	0	0	0	188	0	0	0	283	51	433	0	71	127	1289	0	2442	Fungi{superkingdom}(80);Ascomycota{phylum}(80);Sordariomycetes{class}(80);Hypocreales{order}(80);Nectriaceae{family}(80);Gibberella{genus}(80);Gibberella_intricans{species}(80)	Fungi	Ascomycota	Sordariomycetes	Hypocreales	Nectriaceae	Gibberella	Gibberella_intricans
ASV57	0	0	0	0	0	0	0	0	14	0	0	0	0	0	0	0	0	14	Fungi{superkingdom}(89);Ascomycota{phylum}(89);Sordariomycetes{class}(89);Unassigned{order}(0);Unassigned{family}(0);Unassigned{genus}(0);Unassigned{species}(0)	Fungi	Ascomycota	Sordariomycetes	Unassigned	Unassigned	Unassigned	Unassigned
ASV58	70	0	0	0	1278	0	0	0	238	0	0	0	0	0	5932	121	50	7689	Fungi{superkingdom}(79);Ascomycota{phylum}(79);Sordariomycetes{class}(79);Hypocreales{order}(79);Nectriaceae{family}(79);Fusarium{genus}(79);Unassigned{species}(0)	Fungi	Ascomycota	Sordariomycetes	Hypocreales	Nectriaceae	Fusarium	Unassigned
ASV59	0	781	0	3	0	416	0	0	0	0	0	0	0	0	0	0	0	1200	Fungi{superkingdom}(63);unidentified{phylum}(63);unidentified{class}(63);unidentified{order}(63);unidentified{family}(63);unidentified{genus}(63);unidentified{species}(63)	Fungi	unidentified	unidentified	unidentified	unidentified	unidentified	unidentified
ASV60	5	0	0	0	0	0	0	0	0	0	3	57	0	0	0	0	61	126	Fungi{superkingdom}(92);Ascomycota{phylum}(92);Sordariomycetes{class}(92);Unassigned{order}(0);Unassigned{family}(0);Unassigned{genus}(0);Unassigned{species}(0)	Fungi	Ascomycota	Sordariomycetes	Unassigned	Unassigned	Unassigned	Unassigned
ASV62	12	0	29	45	16	12	0	0	5	52	0	57	0	98	334	0	50	710	Fungi{superkingdom}(100);Unassigned{phylum}(0);Unassigned{class}(0);Unassigned{order}(0);Unassigned{family}(0);Unassigned{genus}(0);Unassigned{species}(0)	Fungi	Unassigned	Unassigned	Unassigned	Unassigned	Unassigned	Unassigned
ASV63	0	0	0	7	3937	0	0	0	0	0	0	0	0	0	2	0	4	3950	Fungi{superkingdom}(84);Ascomycota{phylum}(84);Sordariomycetes{class}(84);Hypocreales{order}(84);Bionectriaceae{family}(84);Clonostachys{genus}(84);Clonostachys_rosea{species}(84)	Fungi	Ascomycota	Sordariomycetes	Hypocreales	Bionectriaceae	Clonostachys	Clonostachys_rosea
ASV64	0	0	1120	130	0	0	0	0	0	0	0	0	0	0	0	0	10	1260	Fungi{superkingdom}(100);Ascomycota{phylum}(100);Sordariomycetes{class}(100);Branch06{order}(100);unidentified{family}(100);unidentified{genus}(100);unidentified{species}(100)	Fungi	Ascomycota	Sordariomycetes	Branch06	unidentified	unidentified	unidentified
ASV65	0	10	0	0	7	0	0	0	0	0	0	64	0	0	161	316	0	558	Fungi{superkingdom}(69);unidentified{phylum}(69);unidentified{class}(69);unidentified{order}(69);unidentified{family}(69);unidentified{genus}(69);unidentified{species}(69)	Fungi	unidentified	unidentified	unidentified	unidentified	unidentified	unidentified
ASV66	0	30	0	16	5	0	0	0	0	0	4	0	0	0	310	47	0	412	Fungi{superkingdom}(76);Ascomycota{phylum}(76);Sordariomycetes{class}(76);Hypocreales{order}(76);Stachybotryaceae{family}(76);Alfaria{genus}(76);Alfaria_cyperi-esculenti{species}(76)	Fungi	Ascomycota	Sordariomycetes	Hypocreales	Stachybotryaceae	Alfaria	Alfaria_cyperi-esculenti
ASV68	74	0	0	0	0	0	0	0	15	0	0	0	0	0	0	0	0	89	Fungi{superkingdom}(92);Ascomycota{phylum}(92);Sordariomycetes{class}(92);Sordariales{order}(92);Chaetomiaceae{family}(92);Zopfiella{genus}(92);unidentified{species}(92)	Fungi	Ascomycota	Sordariomycetes	Sordariales	Chaetomiaceae	Zopfiella	unidentified
ASV69	27	26	9	21	17	10	0	0	0	8	0	0	0	0	12	0	0	130	Fungi{superkingdom}(89);Basidiomycota{phylum}(89);Tremellomycetes{class}(89);Filobasidiales{order}(89);Filobasidiaceae{family}(89);Filobasidium{genus}(89);unidentified{species}(89)	Fungi	Basidiomycota	Tremellomycetes	Filobasidiales	Filobasidiaceae	Filobasidium	unidentified
ASV70	0	0	0	165	0	135	0	0	0	0	0	0	0	0	0	0	0	300	Fungi{superkingdom}(100);Ascomycota{phylum}(100);Dothideomycetes{class}(100);Pleosporales{order}(100);Didymosphaeriaceae{family}(100);Kalmusia{genus}(100);unidentified{species}(100)	Fungi	Ascomycota	Dothideomycetes	Pleosporales	Didymosphaeriaceae	Kalmusia	unidentified
ASV71	0	0	12	11	2	0	0	0	0	0	0	0	0	473	773	3514	22	4807	Fungi{superkingdom}(64);Ascomycota{phylum}(64);Sordariomycetes{class}(64);Hypocreales{order}(64);Bionectriaceae{family}(64);Hydropisphaera{genus}(64);unidentified{species}(64)	Fungi	Ascomycota	Sordariomycetes	Hypocreales	Bionectriaceae	Hydropisphaera	unidentified
ASV72	5	0	0	0	0	0	0	29	0	0	0	0	0	0	0	0	0	34	Fungi{superkingdom}(83);Ascomycota{phylum}(83);Sordariomycetes{class}(83);Hypocreales{order}(83);Bionectriaceae{family}(83);Clonostachys{genus}(83);Clonostachys_rosea{species}(83)	Fungi	Ascomycota	Sordariomycetes	Hypocreales	Bionectriaceae	Clonostachys	Clonostachys_rosea
ASV74	0	0	0	6	0	0	0	0	0	0	0	0	0	0	0	0	0	6	Fungi{superkingdom}(100);Ascomycota{phylum}(100);Sordariomycetes{class}(100);Togniniales{order}(100);Togniniaceae{family}(100);Phaeoacremonium{genus}(100);Phaeoacremonium_rubrigenum{species}(100)	Fungi	Ascomycota	Sordariomycetes	Togniniales	Togniniaceae	Phaeoacremonium	Phaeoacremonium_rubrigenum
ASV75	0	65	0	0	13	0	0	0	0	0	0	0	0	0	88	104	0	270	Fungi{superkingdom}(78);Ascomycota{phylum}(78);Dothideomycetes{class}(78);Pleosporales{order}(78);Didymellaceae{family}(78);Nothophoma{genus}(78);Nothophoma_variabilis{species}(78)	Fungi	Ascomycota	Dothideomycetes	Pleosporales	Didymellaceae	Nothophoma	Nothophoma_variabilis
ASV78	0	129	0	140	0	128	0	0	0	0	17	52	0	0	0	4	0	470	Fungi{superkingdom}(99);Ascomycota{phylum}(99);Dothideomycetes{class}(99);Pleosporales{order}(99);Lophiostomataceae{family}(99);Unassigned{genus}(0);Unassigned{species}(0)	Fungi	Ascomycota	Dothideomycetes	Pleosporales	Lophiostomataceae	Unassigned	Unassigned
ASV79	0	24	0	0	0	0	0	0	10	0	31	19	0	0	0	0	0	84	Fungi{superkingdom}(85);unidentified{phylum}(85);unidentified{class}(85);unidentified{order}(85);unidentified{family}(85);unidentified{genus}(85);unidentified{species}(85)	Fungi	unidentified	unidentified	unidentified	unidentified	unidentified	unidentified
ASV80	4	0	0	0	0	4	0	0	0	1229	0	7	0	0	0	0	0	1244	Fungi{superkingdom}(78);Ascomycota{phylum}(78);Unassigned{class}(0);Unassigned{order}(0);Unassigned{family}(0);Unassigned{genus}(0);Unassigned{species}(0)	Fungi	Ascomycota	Unassigned	Unassigned	Unassigned	Unassigned	Unassigned
ASV81	0	0	0	6	0	0	0	0	0	0	0	0	0	0	0	0	0	6	Fungi{superkingdom}(100);Basidiomycota{phylum}(100);Agaricomycetes{class}(100);Agaricales{order}(100);Omphalotaceae{family}(100);Marasmiellus{genus}(100);Marasmiellus_mesosporus{species}(100)	Fungi	Basidiomycota	Agaricomycetes	Agaricales	Omphalotaceae	Marasmiellus	Marasmiellus_mesosporus
ASV83	0	0	0	0	51	0	0	0	0	0	0	0	0	0	0	0	0	51	Fungi{superkingdom}(100);Basidiomycota{phylum}(100);Agaricomycetes{class}(100);Polyporales{order}(100);Irpicaceae{family}(100);Ceriporia{genus}(100);Ceriporia_xylostromatoides{species}(100)	Fungi	Basidiomycota	Agaricomycetes	Polyporales	Irpicaceae	Ceriporia	Ceriporia_xylostromatoides
ASV84	0	0	0	2876	0	116	0	0	0	0	0	0	0	0	0	0	0	2992	Fungi{superkingdom}(100);Basidiomycota{phylum}(100);Agaricomycetes{class}(100);Agaricales{order}(100);Strophariaceae{family}(100);Tubaria{genus}(100);Tubaria_minima{species}(100)	Fungi	Basidiomycota	Agaricomycetes	Agaricales	Strophariaceae	Tubaria	Tubaria_minima
ASV86	72	2345	88	0	0	0	0	0	0	0	181	0	0	0	0	0	0	2686	Fungi{superkingdom}(98);Mortierellomycota{phylum}(98);Mortierellomycetes{class}(98);Mortierellales{order}(98);Mortierellaceae{family}(98);Mortierella{genus}(98);Mortierella_alpina{species}(98)	Fungi	Mortierellomycota	Mortierellomycetes	Mortierellales	Mortierellaceae	Mortierella	Mortierella_alpina
ASV89	499	247	67	31	14	14	0	0	558	158	143	0	0	0	0	6	0	1737	Fungi{superkingdom}(71);Ascomycota{phylum}(71);Dothideomycetes{class}(71);Pleosporales{order}(71);Phaeosphaeriaceae{family}(71);Paraphoma{genus}(71);Paraphoma_chlamydocopiosa{species}(71)	Fungi	Ascomycota	Dothideomycetes	Pleosporales	Phaeosphaeriaceae	Paraphoma	Paraphoma_chlamydocopiosa
ASV90	0	0	0	0	0	0	0	22	0	0	0	0	0	0	0	0	0	22	Fungi{superkingdom}(100);Basidiomycota{phylum}(100);Agaricomycetes{class}(100);Polyporales{order}(100);Irpicaceae{family}(100);Ceriporia{genus}(100);Ceriporia_xylostromatoides{species}(100)	Fungi	Basidiomycota	Agaricomycetes	Polyporales	Irpicaceae	Ceriporia	Ceriporia_xylostromatoides
ASV91	0	0	0	0	0	0	0	0	0	0	0	0	0	0	0	1671	0	1671	Fungi{superkingdom}(63);Basidiomycota{phylum}(63);Agaricomycetes{class}(63);Unassigned{order}(0);Unassigned{family}(0);Unassigned{genus}(0);Unassigned{species}(0)	Fungi	Basidiomycota	Agaricomycetes	Unassigned	Unassigned	Unassigned	Unassigned
ASV92	1000	24	0	0	0	0	0	0	0	0	0	0	0	0	0	0	0	1024	Fungi{superkingdom}(61);Basidiomycota{phylum}(61);Agaricomycetes{class}(61);Agaricales{order}(61);Agaricaceae{family}(61);Agaricus{genus}(61);unidentified{species}(61)	Fungi	Basidiomycota	Agaricomycetes	Agaricales	Agaricaceae	Agaricus	unidentified
ASV93	216	1383	808	12	600	1656	0	0	0	0	0	0	0	0	0	0	0	4675	Fungi{superkingdom}(65);Ascomycota{phylum}(65);Leotiomycetes{class}(65);Helotiales{order}(65);unidentified{family}(65);unidentified{genus}(65);unidentified{species}(65)	Fungi	Ascomycota	Leotiomycetes	Helotiales	unidentified	unidentified	unidentified
ASV94	45	0	0	12	0	0	0	0	0	0	0	0	0	0	0	14	0	71	Fungi{superkingdom}(60);Ascomycota{phylum}(60);Dothideomycetes{class}(60);Pleosporales{order}(60);Pleosporaceae{family}(60);Drechslera{genus}(60);Drechslera_dematioidea{species}(60)	Fungi	Ascomycota	Dothideomycetes	Pleosporales	Pleosporaceae	Drechslera	Drechslera_dematioidea
ASV96	0	48	0	0	510	0	0	0	0	0	0	56	0	0	0	0	0	614	Fungi{superkingdom}(75);Ascomycota{phylum}(75);Sordariomycetes{class}(75);Hypocreales{order}(75);Cordycipitaceae{family}(75);Beauveria{genus}(75);Beauveria_varroae{species}(75)	Fungi	Ascomycota	Sordariomycetes	Hypocreales	Cordycipitaceae	Beauveria	Beauveria_varroae
ASV97	206	13	0	9	15	17	0	0	0	0	0	0	0	0	0	0	0	260	Fungi{superkingdom}(78);Ascomycota{phylum}(78);Dothideomycetes{class}(78);Unassigned{order}(0);Unassigned{family}(0);Unassigned{genus}(0);Unassigned{species}(0)	Fungi	Ascomycota	Dothideomycetes	Unassigned	Unassigned	Unassigned	Unassigned
ASV99	0	0	0	0	0	0	85	2385	0	80	0	0	0	0	0	0	0	2550	Fungi{superkingdom}(100);Unassigned{phylum}(0);Unassigned{class}(0);Unassigned{order}(0);Unassigned{family}(0);Unassigned{genus}(0);Unassigned{species}(0)	Fungi	Unassigned	Unassigned	Unassigned	Unassigned	Unassigned	Unassigned
ASV100	23	0	0	0	0	4	0	0	0	0	0	0	0	0	0	0	0	27	Fungi{superkingdom}(82);Basidiomycota{phylum}(82);Agaricomycetes{class}(82);unidentified{order}(82);unidentified{family}(82);unidentified{genus}(82);unidentified{species}(82)	Fungi	Basidiomycota	Agaricomycetes	unidentified	unidentified	unidentified	unidentified
ASV101	0	0	0	0	0	0	0	0	0	0	0	0	0	0	80	0	0	80	Fungi{superkingdom}(80);Ascomycota{phylum}(80);Pezizomycetes{class}(80);Pezizales{order}(80);Pezizaceae{family}(80);Iodophanus{genus}(80);Iodophanus_carneus{species}(80)	Fungi	Ascomycota	Pezizomycetes	Pezizales	Pezizaceae	Iodophanus	Iodophanus_carneus
ASV103	0	0	0	0	13	0	0	0	0	0	0	0	0	0	0	0	0	13	Fungi{superkingdom}(100);Unassigned{phylum}(0);Unassigned{class}(0);Unassigned{order}(0);Unassigned{family}(0);Unassigned{genus}(0);Unassigned{species}(0)	Fungi	Unassigned	Unassigned	Unassigned	Unassigned	Unassigned	Unassigned
ASV105	11	42	0	0	0	5	0	0	0	0	0	0	0	0	0	0	0	58	Fungi{superkingdom}(60);Ascomycota{phylum}(60);Orbiliomycetes{class}(60);Orbiliales{order}(60);Orbiliaceae{family}(60);Orbilia{genus}(60);unidentified{species}(60)	Fungi	Ascomycota	Orbiliomycetes	Orbiliales	Orbiliaceae	Orbilia	unidentified
ASV106	0	69	0	0	0	3	0	0	0	106	0	165	0	0	0	65	0	408	Fungi{superkingdom}(100);Ascomycota{phylum}(100);Eurotiomycetes{class}(100);Chaetothyriales{order}(100);Trichomeriaceae{family}(100);Knufia{genus}(100);Knufia_tsunedae{species}(100)	Fungi	Ascomycota	Eurotiomycetes	Chaetothyriales	Trichomeriaceae	Knufia	Knufia_tsunedae
ASV108	0	0	0	0	6186	0	0	0	0	232	0	0	0	15	0	0	0	6433	Fungi{superkingdom}(100);Basidiomycota{phylum}(100);Agaricomycetes{class}(100);Agaricales{order}(100);Tricholomataceae{family}(100);Melanoleuca{genus}(100);Unassigned{species}(0)	Fungi	Basidiomycota	Agaricomycetes	Agaricales	Tricholomataceae	Melanoleuca	Unassigned
ASV109	388	0	0	0	0	0	0	0	0	0	0	0	0	0	0	0	0	388	Fungi{superkingdom}(78);unidentified{phylum}(78);unidentified{class}(78);unidentified{order}(78);unidentified{family}(78);unidentified{genus}(78);unidentified{species}(78)	Fungi	unidentified	unidentified	unidentified	unidentified	unidentified	unidentified
ASV111	0	0	0	0	0	0	0	0	13	0	0	0	0	0	0	0	0	13	Fungi{superkingdom}(75);Basidiomycota{phylum}(75);Agaricomycetes{class}(75);Agaricales{order}(75);unidentified{family}(75);unidentified{genus}(75);unidentified{species}(75)	Fungi	Basidiomycota	Agaricomycetes	Agaricales	unidentified	unidentified	unidentified
ASV112	0	12	0	0	0	0	0	0	0	0	0	0	0	0	0	0	0	12	Fungi{superkingdom}(69);Basidiomycota{phylum}(69);Agaricomycetes{class}(69);unidentified{order}(69);unidentified{family}(69);unidentified{genus}(69);unidentified{species}(69)	Fungi	Basidiomycota	Agaricomycetes	unidentified	unidentified	unidentified	unidentified
ASV113	0	0	0	0	63	57	0	0	0	0	0	2059	0	711	70	1594	0	4554	Fungi{superkingdom}(100);Unassigned{phylum}(0);Unassigned{class}(0);Unassigned{order}(0);Unassigned{family}(0);Unassigned{genus}(0);Unassigned{species}(0)	Fungi	Unassigned	Unassigned	Unassigned	Unassigned	Unassigned	Unassigned
ASV114	0	11	0	0	0	0	0	0	0	0	0	290	0	0	1227	0	0	1528	Fungi{superkingdom}(85);Basidiomycota{phylum}(85);Agaricomycetes{class}(85);unidentified{order}(85);unidentified{family}(85);unidentified{genus}(85);unidentified{species}(85)	Fungi	Basidiomycota	Agaricomycetes	unidentified	unidentified	unidentified	unidentified
ASV115	0	5	0	0	0	0	0	0	0	0	0	6012	0	0	0	0	0	6017	Fungi{superkingdom}(100);Ascomycota{phylum}(100);Pezizomycetes{class}(100);Pezizales{order}(100);Pyronemataceae{family}(100);Scutellinia{genus}(100);unidentified{species}(100)	Fungi	Ascomycota	Pezizomycetes	Pezizales	Pyronemataceae	Scutellinia	unidentified
ASV116	65	192	136	374	109	14	705	0	0	0	0	0	0	0	0	0	0	1595	Fungi{superkingdom}(100);Ascomycota{phylum}(100);Dothideomycetes{class}(100);Pleosporales{order}(100);Phaeosphaeriaceae{family}(100);Paraphoma{genus}(100);Paraphoma_chrysanthemicola{species}(100)	Fungi	Ascomycota	Dothideomycetes	Pleosporales	Phaeosphaeriaceae	Paraphoma	Paraphoma_chrysanthemicola
ASV117	0	0	14	0	0	33	0	0	0	0	0	0	0	0	0	0	0	47	Fungi{superkingdom}(98);Ascomycota{phylum}(98);Sordariomycetes{class}(98);Hypocreales{order}(98);Clavicipitaceae{family}(98);Metacordyceps{genus}(98);Metacordyceps_chlamydosporia{species}(98)	Fungi	Ascomycota	Sordariomycetes	Hypocreales	Clavicipitaceae	Metacordyceps	Metacordyceps_chlamydosporia
ASV118	2244	0	0	0	0	0	0	0	0	0	0	0	0	0	0	0	0	2244	Fungi{superkingdom}(77);Basidiomycota{phylum}(77);Agaricomycetes{class}(77);Agaricales{order}(77);Omphalotaceae{family}(77);Marasmiellus{genus}(77);Marasmiellus_paspali{species}(77)	Fungi	Basidiomycota	Agaricomycetes	Agaricales	Omphalotaceae	Marasmiellus	Marasmiellus_paspali
ASV119	0	598	75	0	16	0	130	2305	998	0	40	446	0	0	0	0	0	4608	Fungi{superkingdom}(83);Ascomycota{phylum}(83);Sordariomycetes{class}(83);Hypocreales{order}(83);Nectriaceae{family}(83);Thyronectria{genus}(83);Thyronectria_caraganae{species}(83)	Fungi	Ascomycota	Sordariomycetes	Hypocreales	Nectriaceae	Thyronectria	Thyronectria_caraganae
ASV120	0	0	0	0	0	0	0	0	0	4686	0	0	0	22	0	0	0	4708	Fungi{superkingdom}(89);Ascomycota{phylum}(89);Sordariomycetes{class}(89);Sordariales{order}(89);Chaetomiaceae{family}(89);Unassigned{genus}(0);Unassigned{species}(0)	Fungi	Ascomycota	Sordariomycetes	Sordariales	Chaetomiaceae	Unassigned	Unassigned
ASV124	0	0	0	0	0	0	0	0	0	30	0	0	0	0	0	0	0	30	Fungi{superkingdom}(100);Unassigned{phylum}(0);Unassigned{class}(0);Unassigned{order}(0);Unassigned{family}(0);Unassigned{genus}(0);Unassigned{species}(0)	Fungi	Unassigned	Unassigned	Unassigned	Unassigned	Unassigned	Unassigned
ASV126	0	7	0	0	0	0	0	0	0	0	0	0	0	0	0	0	0	7	Fungi{superkingdom}(88);Basidiomycota{phylum}(88);Agaricomycetes{class}(88);Agaricales{order}(88);Bolbitiaceae{family}(88);Panaeolus{genus}(88);Panaeolus_semiovatus{species}(88)	Fungi	Basidiomycota	Agaricomycetes	Agaricales	Bolbitiaceae	Panaeolus	Panaeolus_semiovatus
ASV127	15	0	0	0	35	0	0	0	0	0	0	0	0	0	0	60	0	110	Fungi{superkingdom}(96);Ascomycota{phylum}(96);Eurotiomycetes{class}(96);Chaetothyriales{order}(96);Trichomeriaceae{family}(96);Knufia{genus}(96);Knufia_tsunedae{species}(96)	Fungi	Ascomycota	Eurotiomycetes	Chaetothyriales	Trichomeriaceae	Knufia	Knufia_tsunedae
ASV128	0	0	0	0	0	0	0	0	331	5724	0	0	0	0	0	0	0	6055	Fungi{superkingdom}(82);Ascomycota{phylum}(82);Sordariomycetes{class}(82);Hypocreales{order}(82);Nectriaceae{family}(82);Fusarium{genus}(82);Fusarium_solani{species}(82)	Fungi	Ascomycota	Sordariomycetes	Hypocreales	Nectriaceae	Fusarium	Fusarium_solani
ASV130	96	14	0	0	0	6	0	0	0	0	0	0	0	0	0	0	0	116	Fungi{superkingdom}(77);Basidiomycota{phylum}(77);Agaricomycetes{class}(77);unidentified{order}(77);unidentified{family}(77);unidentified{genus}(77);unidentified{species}(77)	Fungi	Basidiomycota	Agaricomycetes	unidentified	unidentified	unidentified	unidentified
ASV131	0	1086	15	24	92	5	0	0	0	0	0	1475	0	0	0	11	31	2739	Fungi{superkingdom}(100);Unassigned{phylum}(0);Unassigned{class}(0);Unassigned{order}(0);Unassigned{family}(0);Unassigned{genus}(0);Unassigned{species}(0)	Fungi	Unassigned	Unassigned	Unassigned	Unassigned	Unassigned	Unassigned
ASV132	35	51	11	62	33	82	0	0	0	0	0	0	0	66	0	9	0	349	Fungi{superkingdom}(99);Ascomycota{phylum}(99);Dothideomycetes{class}(99);Pleosporales{order}(99);Pleosporaceae{family}(99);Comoclathris{genus}(99);unidentified{species}(99)	Fungi	Ascomycota	Dothideomycetes	Pleosporales	Pleosporaceae	Comoclathris	unidentified
ASV133	0	0	0	0	0	0	0	0	0	0	0	0	0	0	6194	0	0	6194	Fungi{superkingdom}(87);Basidiomycota{phylum}(87);Agaricomycetes{class}(87);Agaricales{order}(87);Tricholomataceae{family}(87);Melanoleuca{genus}(87);Melanoleuca_communis{species}(87)	Fungi	Basidiomycota	Agaricomycetes	Agaricales	Tricholomataceae	Melanoleuca	Melanoleuca_communis
ASV134	0	0	0	0	0	0	0	0	0	0	0	6174	0	0	0	0	0	6174	Fungi{superkingdom}(100);Unassigned{phylum}(0);Unassigned{class}(0);Unassigned{order}(0);Unassigned{family}(0);Unassigned{genus}(0);Unassigned{species}(0)	Fungi	Unassigned	Unassigned	Unassigned	Unassigned	Unassigned	Unassigned
ASV139	256	0	0	0	176	0	0	0	0	0	135	0	0	0	0	0	0	567	Fungi{superkingdom}(100);Ascomycota{phylum}(100);Dothideomycetes{class}(100);Pleosporales{order}(100);Phaeosphaeriaceae{family}(100);Paraphoma{genus}(100);Paraphoma_chrysanthemicola{species}(100)	Fungi	Ascomycota	Dothideomycetes	Pleosporales	Phaeosphaeriaceae	Paraphoma	Paraphoma_chrysanthemicola
ASV140	0	0	0	20	8	13	0	0	0	0	0	0	0	0	0	0	0	41	Fungi{superkingdom}(100);Ascomycota{phylum}(100);Pezizomycetes{class}(100);Pezizales{order}(100);Pezizaceae{family}(100);unidentified{genus}(100);unidentified{species}(100)	Fungi	Ascomycota	Pezizomycetes	Pezizales	Pezizaceae	unidentified	unidentified
ASV141	0	387	0	0	0	0	0	0	0	0	0	0	0	0	46	187	0	620	Fungi{superkingdom}(64);Ascomycota{phylum}(64);Eurotiomycetes{class}(64);Chaetothyriales{order}(64);unidentified{family}(64);unidentified{genus}(64);unidentified{species}(64)	Fungi	Ascomycota	Eurotiomycetes	Chaetothyriales	unidentified	unidentified	unidentified
ASV143	46	40	8	0	4	0	0	0	0	0	0	0	0	0	0	0	0	98	Fungi{superkingdom}(83);Ascomycota{phylum}(83);Dothideomycetes{class}(83);Pleosporales{order}(83);Phaeosphaeriaceae{family}(83);Wojnowiciella{genus}(83);Wojnowiciella_leptocarpi{species}(83)	Fungi	Ascomycota	Dothideomycetes	Pleosporales	Phaeosphaeriaceae	Wojnowiciella	Wojnowiciella_leptocarpi
ASV144	0	0	0	0	0	0	0	0	0	0	0	0	0	0	55	0	0	55	Fungi{superkingdom}(100);Ascomycota{phylum}(100);Dothideomycetes{class}(100);Pleosporales{order}(100);Didymellaceae{family}(100);Unassigned{genus}(0);Unassigned{species}(0)	Fungi	Ascomycota	Dothideomycetes	Pleosporales	Didymellaceae	Unassigned	Unassigned
ASV145	0	255	0	0	0	0	0	0	0	0	0	31	0	0	0	0	0	286	Fungi{superkingdom}(89);Basidiomycota{phylum}(89);Agaricomycetes{class}(89);Agaricales{order}(89);Psathyrellaceae{family}(89);Coprinopsis{genus}(89);Unassigned{species}(0)	Fungi	Basidiomycota	Agaricomycetes	Agaricales	Psathyrellaceae	Coprinopsis	Unassigned
ASV146	38	0	0	0	0	0	0	0	0	0	0	0	0	0	0	0	0	38	Fungi{superkingdom}(100);Ascomycota{phylum}(100);Dothideomycetes{class}(100);Pleosporales{order}(100);Pleosporales_fam_Incertae_sedis{family}(100);Massariosphaeria{genus}(100);Massariosphaeria_roumeguerei{species}(100)	Fungi	Ascomycota	Dothideomycetes	Pleosporales	Pleosporales_fam_Incertae_sedis	Massariosphaeria	Massariosphaeria_roumeguerei
ASV147	0	0	0	0	0	0	0	0	0	0	0	1113	0	0	4275	0	0	5388	Fungi{superkingdom}(87);Basidiomycota{phylum}(87);Agaricomycetes{class}(87);Agaricales{order}(87);Tricholomataceae{family}(87);Melanoleuca{genus}(87);Melanoleuca_communis{species}(87)	Fungi	Basidiomycota	Agaricomycetes	Agaricales	Tricholomataceae	Melanoleuca	Melanoleuca_communis
ASV149	15	80	20	195	0	8	0	0	147	0	1477	0	0	0	0	0	0	1942	Fungi{superkingdom}(100);Ascomycota{phylum}(100);Dothideomycetes{class}(100);Pleosporales{order}(100);Unassigned{family}(0);Unassigned{genus}(0);Unassigned{species}(0)	Fungi	Ascomycota	Dothideomycetes	Pleosporales	Unassigned	Unassigned	Unassigned
ASV152	0	33	13	0	0	0	0	0	0	0	0	0	0	0	0	0	0	46	Fungi{superkingdom}(100);Ascomycota{phylum}(100);Dothideomycetes{class}(100);Pleosporales{order}(100);Pleosporaceae{family}(100);Curvularia{genus}(100);Curvularia_kusanoi{species}(100)	Fungi	Ascomycota	Dothideomycetes	Pleosporales	Pleosporaceae	Curvularia	Curvularia_kusanoi
ASV153	248	0	100	367	57	344	0	0	149	97	0	0	0	96	0	0	0	1458	Fungi{superkingdom}(75);Ascomycota{phylum}(75);Eurotiomycetes{class}(75);Eurotiales{order}(75);Aspergillaceae{family}(75);Penicillium{genus}(75);Penicillium_griseofulvum{species}(75)	Fungi	Ascomycota	Eurotiomycetes	Eurotiales	Aspergillaceae	Penicillium	Penicillium_griseofulvum
ASV154	0	168	37	149	279	11	0	0	0	0	0	17	0	15	0	12	0	688	Fungi{superkingdom}(66);Ascomycota{phylum}(66);Dothideomycetes{class}(66);Pleosporales{order}(66);Camarosporidiellaceae{family}(66);Camarosporidiella{genus}(66);Camarosporidiella_mackenziei{species}(66)	Fungi	Ascomycota	Dothideomycetes	Pleosporales	Camarosporidiellaceae	Camarosporidiella	Camarosporidiella_mackenziei
ASV155	0	58	0	8	10	0	0	0	0	0	89	63	0	3	0	0	0	231	Fungi{superkingdom}(94);Ascomycota{phylum}(94);Dothideomycetes{class}(94);Pleosporales{order}(94);Dictyosporiaceae{family}(94);Pseudocoleophoma{genus}(94);Pseudocoleophoma_polygonicola{species}(94)	Fungi	Ascomycota	Dothideomycetes	Pleosporales	Dictyosporiaceae	Pseudocoleophoma	Pseudocoleophoma_polygonicola
ASV156	49	453	144	104	251	76	0	0	0	0	0	0	0	0	0	0	0	1077	Fungi{superkingdom}(83);unidentified{phylum}(83);unidentified{class}(83);unidentified{order}(83);unidentified{family}(83);unidentified{genus}(83);unidentified{species}(83)	Fungi	unidentified	unidentified	unidentified	unidentified	unidentified	unidentified
ASV157	54	0	0	0	0	0	0	0	0	0	0	9	0	0	0	0	0	63	Fungi{superkingdom}(100);Ascomycota{phylum}(100);Sordariomycetes{class}(100);Sordariales{order}(100);Lasiosphaeriaceae{family}(100);Cercophora{genus}(100);Cercophora_mirabilis{species}(100)	Fungi	Ascomycota	Sordariomycetes	Sordariales	Lasiosphaeriaceae	Cercophora	Cercophora_mirabilis
ASV158	0	0	0	0	0	0	0	0	0	0	74	487	0	0	0	0	0	561	Fungi{superkingdom}(100);Ascomycota{phylum}(100);Sordariomycetes{class}(100);Hypocreales{order}(100);Cordycipitaceae{family}(100);Lecanicillium{genus}(100);Lecanicillium_dimorphum{species}(100)	Fungi	Ascomycota	Sordariomycetes	Hypocreales	Cordycipitaceae	Lecanicillium	Lecanicillium_dimorphum
ASV159	0	0	0	0	0	0	0	2	0	0	0	0	0	0	0	0	0	2	Fungi{superkingdom}(68);Ascomycota{phylum}(68);Unassigned{class}(0);Unassigned{order}(0);Unassigned{family}(0);Unassigned{genus}(0);Unassigned{species}(0)	Fungi	Ascomycota	Unassigned	Unassigned	Unassigned	Unassigned	Unassigned
ASV160	0	0	0	0	14	0	0	49	0	0	0	268	0	0	0	0	0	331	Fungi{superkingdom}(70);Ascomycota{phylum}(70);Dothideomycetes{class}(70);Pleosporales{order}(70);Phaeosphaeriaceae{family}(70);Paraphoma{genus}(70);Paraphoma_pye{species}(70)	Fungi	Ascomycota	Dothideomycetes	Pleosporales	Phaeosphaeriaceae	Paraphoma	Paraphoma_pye
ASV161	0	285	0	0	0	0	0	0	0	0	0	0	0	0	0	0	0	285	Fungi{superkingdom}(97);Ascomycota{phylum}(97);Leotiomycetes{class}(97);Helotiales{order}(97);Helotiaceae{family}(97);Articulospora{genus}(97);unidentified{species}(97)	Fungi	Ascomycota	Leotiomycetes	Helotiales	Helotiaceae	Articulospora	unidentified
ASV162	0	0	0	8	30	0	0	0	0	34	45	0	0	772	106	30	0	1025	Fungi{superkingdom}(72);Ascomycota{phylum}(72);Sordariomycetes{class}(72);Hypocreales{order}(72);unidentified{family}(72);unidentified{genus}(72);unidentified{species}(72)	Fungi	Ascomycota	Sordariomycetes	Hypocreales	unidentified	unidentified	unidentified
ASV164	0	0	0	0	0	0	0	0	0	0	0	51	0	0	0	0	0	51	Fungi{superkingdom}(100);Basidiomycota{phylum}(100);Agaricomycetes{class}(100);Agaricales{order}(100);Bolbitiaceae{family}(100);Conocybe{genus}(100);Conocybe_deliquescens{species}(100)	Fungi	Basidiomycota	Agaricomycetes	Agaricales	Bolbitiaceae	Conocybe	Conocybe_deliquescens
ASV166	0	0	0	0	0	0	0	0	0	0	0	0	0	0	4863	0	0	4863	Fungi{superkingdom}(100);Ascomycota{phylum}(100);Sordariomycetes{class}(100);Hypocreales{order}(100);Nectriaceae{family}(100);Unassigned{genus}(0);Unassigned{species}(0)	Fungi	Ascomycota	Sordariomycetes	Hypocreales	Nectriaceae	Unassigned	Unassigned
ASV167	5	0	0	0	0	0	0	0	0	0	0	0	0	0	0	0	0	5	Fungi{superkingdom}(99);Ascomycota{phylum}(99);Pezizomycetes{class}(99);Pezizales{order}(99);Pezizaceae{family}(99);unidentified{genus}(99);unidentified{species}(99)	Fungi	Ascomycota	Pezizomycetes	Pezizales	Pezizaceae	unidentified	unidentified
ASV168	0	0	0	0	0	0	0	0	0	0	21	0	0	0	0	0	0	21	Fungi{superkingdom}(100);Unassigned{phylum}(0);Unassigned{class}(0);Unassigned{order}(0);Unassigned{family}(0);Unassigned{genus}(0);Unassigned{species}(0)	Fungi	Unassigned	Unassigned	Unassigned	Unassigned	Unassigned	Unassigned
ASV169	6	0	0	0	0	0	0	0	42	0	0	0	0	0	0	0	0	48	Fungi{superkingdom}(89);Ascomycota{phylum}(89);Sordariomycetes{class}(89);Hypocreales{order}(89);Cordycipitaceae{family}(89);Cordyceps{genus}(89);Cordyceps_bassiana{species}(89)	Fungi	Ascomycota	Sordariomycetes	Hypocreales	Cordycipitaceae	Cordyceps	Cordyceps_bassiana
ASV170	5	0	0	0	0	0	0	0	0	0	0	0	0	0	0	0	0	5	Fungi{superkingdom}(97);Basidiomycota{phylum}(97);Agaricomycetes{class}(97);Agaricales{order}(97);Marasmiaceae{family}(97);Marasmius{genus}(97);Marasmius_bondoi{species}(97)	Fungi	Basidiomycota	Agaricomycetes	Agaricales	Marasmiaceae	Marasmius	Marasmius_bondoi
ASV171	85	0	0	0	34	15	0	0	0	0	17	52	0	9	0	0	0	212	Fungi{superkingdom}(75);Ascomycota{phylum}(75);Dothideomycetes{class}(75);Dothideales{order}(75);Aureobasidiaceae{family}(75);Kabatiella{genus}(75);Kabatiella_bupleuri{species}(75)	Fungi	Ascomycota	Dothideomycetes	Dothideales	Aureobasidiaceae	Kabatiella	Kabatiella_bupleuri
ASV172	0	30	0	0	0	0	0	171	0	2223	0	27	0	0	0	0	0	2451	Fungi{superkingdom}(82);unidentified{phylum}(82);unidentified{class}(82);unidentified{order}(82);unidentified{family}(82);unidentified{genus}(82);unidentified{species}(82)	Fungi	unidentified	unidentified	unidentified	unidentified	unidentified	unidentified
ASV175	0	0	4	0	0	0	0	0	0	0	0	0	0	0	0	0	0	4	Fungi{superkingdom}(71);Ascomycota{phylum}(71);Unassigned{class}(0);Unassigned{order}(0);Unassigned{family}(0);Unassigned{genus}(0);Unassigned{species}(0)	Fungi	Ascomycota	Unassigned	Unassigned	Unassigned	Unassigned	Unassigned
ASV177	0	25	0	0	0	0	0	0	0	0	0	100	0	112	271	56	11	575	Fungi{superkingdom}(91);Ascomycota{phylum}(91);Sordariomycetes{class}(91);Hypocreales{order}(91);Stachybotryaceae{family}(91);Stachybotrys{genus}(91);Stachybotrys_chartarum{species}(91)	Fungi	Ascomycota	Sordariomycetes	Hypocreales	Stachybotryaceae	Stachybotrys	Stachybotrys_chartarum
ASV178	551	0	0	0	0	0	0	0	0	0	0	0	0	0	0	0	0	551	Fungi{superkingdom}(100);Ascomycota{phylum}(100);Leotiomycetes{class}(100);Helotiales{order}(100);Unassigned{family}(0);Unassigned{genus}(0);Unassigned{species}(0)	Fungi	Ascomycota	Leotiomycetes	Helotiales	Unassigned	Unassigned	Unassigned
ASV179	0	0	0	0	0	0	0	0	0	0	1891	0	0	0	0	0	0	1891	Fungi{superkingdom}(100);Unassigned{phylum}(0);Unassigned{class}(0);Unassigned{order}(0);Unassigned{family}(0);Unassigned{genus}(0);Unassigned{species}(0)	Fungi	Unassigned	Unassigned	Unassigned	Unassigned	Unassigned	Unassigned
ASV181	7	1474	127	138	113	52	0	0	0	0	0	0	0	0	0	0	0	1911	Fungi{superkingdom}(97);Ascomycota{phylum}(97);Sordariomycetes{class}(97);Hypocreales{order}(97);Hypocreales_fam_Incertae_sedis{family}(97);Acremonium{genus}(97);Acremonium_spinosum{species}(97)	Fungi	Ascomycota	Sordariomycetes	Hypocreales	Hypocreales_fam_Incertae_sedis	Acremonium	Acremonium_spinosum
ASV183	0	3	0	0	0	0	0	0	0	0	0	0	0	0	0	0	0	3	Fungi{superkingdom}(96);Basidiomycota{phylum}(96);Agaricomycetes{class}(96);Agaricales{order}(96);Entolomataceae{family}(96);Clitopilus{genus}(96);unidentified{species}(96)	Fungi	Basidiomycota	Agaricomycetes	Agaricales	Entolomataceae	Clitopilus	unidentified
ASV184	0	0	0	0	0	0	0	0	0	0	0	1009	0	0	0	0	0	1009	Fungi{superkingdom}(87);Ascomycota{phylum}(87);Dothideomycetes{class}(87);Pleosporales{order}(87);Unassigned{family}(0);Unassigned{genus}(0);Unassigned{species}(0)	Fungi	Ascomycota	Dothideomycetes	Pleosporales	Unassigned	Unassigned	Unassigned
ASV186	0	0	0	0	11	0	0	0	0	0	0	0	0	0	0	0	0	11	Fungi{superkingdom}(97);Ascomycota{phylum}(97);Dothideomycetes{class}(97);Pleosporales{order}(97);Pleosporaceae{family}(97);Comoclathris{genus}(97);unidentified{species}(97)	Fungi	Ascomycota	Dothideomycetes	Pleosporales	Pleosporaceae	Comoclathris	unidentified
ASV187	0	0	0	13	6	0	0	0	0	0	0	0	0	0	0	0	0	19	Fungi{superkingdom}(90);Ascomycota{phylum}(90);Sordariomycetes{class}(90);Hypocreales{order}(90);Hypocreales_fam_Incertae_sedis{family}(90);Acremonium{genus}(90);Acremonium_dichromosporum{species}(90)	Fungi	Ascomycota	Sordariomycetes	Hypocreales	Hypocreales_fam_Incertae_sedis	Acremonium	Acremonium_dichromosporum
ASV189	0	0	0	0	0	0	0	0	0	0	0	38	0	0	0	0	0	38	Fungi{superkingdom}(100);Unassigned{phylum}(0);Unassigned{class}(0);Unassigned{order}(0);Unassigned{family}(0);Unassigned{genus}(0);Unassigned{species}(0)	Fungi	Unassigned	Unassigned	Unassigned	Unassigned	Unassigned	Unassigned
ASV190	448	17	0	0	9	21	0	0	0	0	0	0	0	0	0	19	0	514	Fungi{superkingdom}(80);Ascomycota{phylum}(80);Dothideomycetes{class}(80);Pleosporales{order}(80);Phaeosphaeriaceae{family}(80);Paraphoma{genus}(80);Paraphoma_chrysanthemicola{species}(80)	Fungi	Ascomycota	Dothideomycetes	Pleosporales	Phaeosphaeriaceae	Paraphoma	Paraphoma_chrysanthemicola
ASV192	118	5	15	0	38	0	0	0	0	58	0	32	0	0	0	0	0	266	Fungi{superkingdom}(100);Unassigned{phylum}(0);Unassigned{class}(0);Unassigned{order}(0);Unassigned{family}(0);Unassigned{genus}(0);Unassigned{species}(0)	Fungi	Unassigned	Unassigned	Unassigned	Unassigned	Unassigned	Unassigned
ASV194	0	0	0	0	0	13	0	0	0	0	0	0	0	0	0	0	0	13	Fungi{superkingdom}(100);Mortierellomycota{phylum}(100);Mortierellomycetes{class}(100);Mortierellales{order}(100);Mortierellaceae{family}(100);Mortierella{genus}(100);Mortierella_wolfii{species}(100)	Fungi	Mortierellomycota	Mortierellomycetes	Mortierellales	Mortierellaceae	Mortierella	Mortierella_wolfii
ASV195	11	0	0	0	0	0	0	0	0	0	0	0	0	0	0	0	0	11	Fungi{superkingdom}(96);Ascomycota{phylum}(96);Dothideomycetes{class}(96);Pleosporales{order}(96);Pleosporaceae{family}(96);Bipolaris{genus}(96);Bipolaris_microlaenae{species}(96)	Fungi	Ascomycota	Dothideomycetes	Pleosporales	Pleosporaceae	Bipolaris	Bipolaris_microlaenae
ASV197	0	0	0	0	0	0	0	0	0	0	0	0	11	0	0	0	0	11	Fungi{superkingdom}(79);Basidiomycota{phylum}(79);Agaricomycetes{class}(79);Agaricales{order}(79);unidentified{family}(79);unidentified{genus}(79);unidentified{species}(79)	Fungi	Basidiomycota	Agaricomycetes	Agaricales	unidentified	unidentified	unidentified
ASV199	0	0	0	0	7	0	0	0	0	0	0	0	0	0	0	0	0	7	Fungi{superkingdom}(86);Ascomycota{phylum}(86);Pezizomycetes{class}(86);Pezizales{order}(86);Pezizaceae{family}(86);Iodophanus{genus}(86);unidentified{species}(86)	Fungi	Ascomycota	Pezizomycetes	Pezizales	Pezizaceae	Iodophanus	unidentified
ASV202	0	0	0	32	177	10	0	0	0	0	0	0	0	0	0	0	0	219	Fungi{superkingdom}(100);Mortierellomycota{phylum}(100);Mortierellomycetes{class}(100);Mortierellales{order}(100);Mortierellaceae{family}(100);Mortierella{genus}(100);Mortierella_alpina{species}(100)	Fungi	Mortierellomycota	Mortierellomycetes	Mortierellales	Mortierellaceae	Mortierella	Mortierella_alpina
ASV203	53	0	0	0	0	0	0	0	0	0	0	0	0	0	3938	0	0	3991	Fungi{superkingdom}(83);Basidiomycota{phylum}(83);Agaricomycetes{class}(83);Agaricales{order}(83);Bolbitiaceae{family}(83);Conocybe{genus}(83);Conocybe_velutipes{species}(83)	Fungi	Basidiomycota	Agaricomycetes	Agaricales	Bolbitiaceae	Conocybe	Conocybe_velutipes
ASV204	151	0	0	0	10	0	0	0	0	0	0	0	0	0	0	0	0	161	Fungi{superkingdom}(63);Basidiomycota{phylum}(63);Agaricomycetes{class}(63);unidentified{order}(63);unidentified{family}(63);unidentified{genus}(63);unidentified{species}(63)	Fungi	Basidiomycota	Agaricomycetes	unidentified	unidentified	unidentified	unidentified
ASV206	0	0	0	0	0	0	0	0	0	0	0	0	0	0	1526	0	0	1526	Fungi{superkingdom}(67);unidentified{phylum}(67);unidentified{class}(67);unidentified{order}(67);unidentified{family}(67);unidentified{genus}(67);unidentified{species}(67)	Fungi	unidentified	unidentified	unidentified	unidentified	unidentified	unidentified
ASV207	0	253	0	10	16	0	0	0	0	0	0	96	0	0	0	0	0	375	Fungi{superkingdom}(100);Ascomycota{phylum}(100);Dothideomycetes{class}(100);Pleosporales{order}(100);Dictyosporiaceae{family}(100);Dictyosporium{genus}(100);Dictyosporium_heptasporum{species}(100)	Fungi	Ascomycota	Dothideomycetes	Pleosporales	Dictyosporiaceae	Dictyosporium	Dictyosporium_heptasporum
ASV208	0	0	10	0	13	0	0	0	0	0	0	0	0	0	0	0	0	23	Fungi{superkingdom}(100);Ascomycota{phylum}(100);Sordariomycetes{class}(100);Sordariales{order}(100);Chaetomiaceae{family}(100);Chaetomium{genus}(100);Chaetomium_angulare{species}(100)	Fungi	Ascomycota	Sordariomycetes	Sordariales	Chaetomiaceae	Chaetomium	Chaetomium_angulare
ASV209	0	0	0	0	0	0	0	0	0	0	0	15	0	0	0	0	0	15	Fungi{superkingdom}(100);Ascomycota{phylum}(100);Dothideomycetes{class}(100);Pleosporales{order}(100);Pleosporales_fam_Incertae_sedis{family}(100);Massariosphaeria{genus}(100);Massariosphaeria_roumeguerei{species}(100)	Fungi	Ascomycota	Dothideomycetes	Pleosporales	Pleosporales_fam_Incertae_sedis	Massariosphaeria	Massariosphaeria_roumeguerei
ASV210	331	11	0	0	0	0	0	0	0	0	0	0	0	0	0	39	0	381	Fungi{superkingdom}(61);Ascomycota{phylum}(61);Dothideomycetes{class}(61);Pleosporales{order}(61);Phaeosphaeriaceae{family}(61);Parastagonospora{genus}(61);Parastagonospora_nodorum{species}(61)	Fungi	Ascomycota	Dothideomycetes	Pleosporales	Phaeosphaeriaceae	Parastagonospora	Parastagonospora_nodorum
ASV211	0	0	0	406	0	0	0	0	0	0	0	331	0	0	0	136	0	873	Fungi{superkingdom}(90);Ascomycota{phylum}(90);Sordariomycetes{class}(90);Hypocreales{order}(90);Nectriaceae{family}(90);Fusarium{genus}(90);Fusarium_kyushuense{species}(90)	Fungi	Ascomycota	Sordariomycetes	Hypocreales	Nectriaceae	Fusarium	Fusarium_kyushuense
ASV212	0	0	0	0	0	0	0	0	0	0	72	0	0	0	0	5	0	77	Fungi{superkingdom}(100);Unassigned{phylum}(0);Unassigned{class}(0);Unassigned{order}(0);Unassigned{family}(0);Unassigned{genus}(0);Unassigned{species}(0)	Fungi	Unassigned	Unassigned	Unassigned	Unassigned	Unassigned	Unassigned
ASV213	0	0	0	0	0	0	0	0	0	0	0	78	0	0	0	0	0	78	Fungi{superkingdom}(100);Basidiomycota{phylum}(100);Agaricomycetes{class}(100);Agaricales{order}(100);Bolbitiaceae{family}(100);Conocybe{genus}(100);Conocybe_deliquescens{species}(100)	Fungi	Basidiomycota	Agaricomycetes	Agaricales	Bolbitiaceae	Conocybe	Conocybe_deliquescens
ASV214	0	81	0	0	8	32	0	0	0	0	0	0	0	0	0	0	0	121	Fungi{superkingdom}(84);Ascomycota{phylum}(84);Dothideomycetes{class}(84);Pleosporales{order}(84);Phaeosphaeriaceae{family}(84);Wojnowiciella{genus}(84);Wojnowiciella_dactylidis{species}(84)	Fungi	Ascomycota	Dothideomycetes	Pleosporales	Phaeosphaeriaceae	Wojnowiciella	Wojnowiciella_dactylidis
ASV215	0	0	0	0	0	0	0	0	2096	0	109	0	0	0	0	0	0	2205	Fungi{superkingdom}(100);Ascomycota{phylum}(100);Dothideomycetes{class}(100);Pleosporales{order}(100);Morosphaeriaceae{family}(100);Acrocalymma{genus}(100);unidentified{species}(100)	Fungi	Ascomycota	Dothideomycetes	Pleosporales	Morosphaeriaceae	Acrocalymma	unidentified
ASV216	5	0	0	6	0	8	0	0	0	0	0	0	0	3	0	0	0	22	Fungi{superkingdom}(69);Ascomycota{phylum}(69);Leotiomycetes{class}(69);Helotiales{order}(69);Helotiaceae{family}(69);Articulospora{genus}(69);Unassigned{species}(0)	Fungi	Ascomycota	Leotiomycetes	Helotiales	Helotiaceae	Articulospora	Unassigned
ASV219	0	0	0	0	0	20	0	0	0	0	0	0	0	0	0	0	0	20	Fungi{superkingdom}(96);Ascomycota{phylum}(96);Sordariomycetes{class}(96);Sordariales{order}(96);Chaetomiaceae{family}(96);Zopfiella{genus}(96);unidentified{species}(96)	Fungi	Ascomycota	Sordariomycetes	Sordariales	Chaetomiaceae	Zopfiella	unidentified
ASV221	0	0	75	0	54	0	0	274	0	0	0	0	0	0	0	0	0	403	Fungi{superkingdom}(68);unidentified{phylum}(68);unidentified{class}(68);unidentified{order}(68);unidentified{family}(68);unidentified{genus}(68);unidentified{species}(68)	Fungi	unidentified	unidentified	unidentified	unidentified	unidentified	unidentified
ASV224	0	0	9	0	0	0	0	0	0	0	0	0	0	0	0	0	0	9	Fungi{superkingdom}(85);Ascomycota{phylum}(85);Dothideomycetes{class}(85);Pleosporales{order}(85);Lophiostomataceae{family}(85);Lophiostoma{genus}(85);Lophiostoma_rosae{species}(85)	Fungi	Ascomycota	Dothideomycetes	Pleosporales	Lophiostomataceae	Lophiostoma	Lophiostoma_rosae
ASV225	0	0	0	0	0	0	0	0	0	0	56	0	0	0	0	0	0	56	Fungi{superkingdom}(100);Ascomycota{phylum}(100);Dothideomycetes{class}(100);Pleosporales{order}(100);Sporormiaceae{family}(100);Preussia{genus}(100);Preussia_terricola{species}(100)	Fungi	Ascomycota	Dothideomycetes	Pleosporales	Sporormiaceae	Preussia	Preussia_terricola
ASV226	0	1081	0	0	0	0	0	0	0	0	0	0	0	0	0	99	0	1180	Fungi{superkingdom}(63);Ascomycota{phylum}(63);Eurotiomycetes{class}(63);Chaetothyriales{order}(63);unidentified{family}(63);unidentified{genus}(63);unidentified{species}(63)	Fungi	Ascomycota	Eurotiomycetes	Chaetothyriales	unidentified	unidentified	unidentified
ASV227	0	12	0	0	0	0	0	0	0	0	0	0	0	0	0	0	0	12	Fungi{superkingdom}(84);unidentified{phylum}(84);unidentified{class}(84);unidentified{order}(84);unidentified{family}(84);unidentified{genus}(84);unidentified{species}(84)	Fungi	unidentified	unidentified	unidentified	unidentified	unidentified	unidentified
ASV228	0	0	0	0	154	34	0	0	0	0	0	0	0	0	31	0	0	219	Fungi{superkingdom}(94);Ascomycota{phylum}(94);Dothideomycetes{class}(94);Pleosporales{order}(94);Pleosporaceae{family}(94);Comoclathris{genus}(94);unidentified{species}(94)	Fungi	Ascomycota	Dothideomycetes	Pleosporales	Pleosporaceae	Comoclathris	unidentified
ASV229	0	0	0	17	0	0	0	0	0	0	0	0	0	0	0	0	0	17	Fungi{superkingdom}(74);unidentified{phylum}(74);unidentified{class}(74);unidentified{order}(74);unidentified{family}(74);unidentified{genus}(74);unidentified{species}(74)	Fungi	unidentified	unidentified	unidentified	unidentified	unidentified	unidentified
ASV231	0	108	0	0	0	0	0	0	0	0	0	0	0	12	29	0	0	149	Fungi{superkingdom}(100);Ascomycota{phylum}(100);Dothideomycetes{class}(100);Pleosporales{order}(100);Lophiostomataceae{family}(100);Unassigned{genus}(0);Unassigned{species}(0)	Fungi	Ascomycota	Dothideomycetes	Pleosporales	Lophiostomataceae	Unassigned	Unassigned
ASV232	162	14	0	0	5	8	0	0	0	0	0	46	0	0	0	0	0	235	Fungi{superkingdom}(66);Ascomycota{phylum}(66);Dothideomycetes{class}(66);Unassigned{order}(0);Unassigned{family}(0);Unassigned{genus}(0);Unassigned{species}(0)	Fungi	Ascomycota	Dothideomycetes	Unassigned	Unassigned	Unassigned	Unassigned
ASV233	0	16	0	42	14	15	0	0	0	0	0	0	0	0	0	0	0	87	Fungi{superkingdom}(61);Basidiomycota{phylum}(61);Tremellomycetes{class}(61);Filobasidiales{order}(61);Filobasidiaceae{family}(61);Filobasidium{genus}(61);Filobasidium_chernovii{species}(61)	Fungi	Basidiomycota	Tremellomycetes	Filobasidiales	Filobasidiaceae	Filobasidium	Filobasidium_chernovii
ASV234	0	22	0	0	0	4	0	0	0	0	0	0	0	0	1366	0	0	1392	Fungi{superkingdom}(99);Ascomycota{phylum}(99);Dothideomycetes{class}(99);Pleosporales{order}(99);Sporormiaceae{family}(99);Preussia{genus}(99);Preussia_terricola{species}(99)	Fungi	Ascomycota	Dothideomycetes	Pleosporales	Sporormiaceae	Preussia	Preussia_terricola
ASV235	0	4	21	17	0	0	0	0	0	0	0	0	0	0	0	0	0	42	Fungi{superkingdom}(97);Mortierellomycota{phylum}(97);Mortierellomycetes{class}(97);Mortierellales{order}(97);Mortierellaceae{family}(97);Mortierella{genus}(97);Mortierella_alpina{species}(97)	Fungi	Mortierellomycota	Mortierellomycetes	Mortierellales	Mortierellaceae	Mortierella	Mortierella_alpina
ASV236	0	0	0	0	0	0	0	0	0	0	0	1473	0	0	257	411	0	2141	Fungi{superkingdom}(100);Ascomycota{phylum}(100);Sordariomycetes{class}(100);Hypocreales{order}(100);Stachybotryaceae{family}(100);Unassigned{genus}(0);Unassigned{species}(0)	Fungi	Ascomycota	Sordariomycetes	Hypocreales	Stachybotryaceae	Unassigned	Unassigned
ASV240	0	594	55	305	86	0	0	0	0	0	0	36	0	0	0	0	0	1076	Fungi{superkingdom}(77);Ascomycota{phylum}(77);Dothideomycetes{class}(77);Pleosporales{order}(77);Zopfiaceae{family}(77);Didymocrea{genus}(77);Didymocrea_sadasivanii{species}(77)	Fungi	Ascomycota	Dothideomycetes	Pleosporales	Zopfiaceae	Didymocrea	Didymocrea_sadasivanii
ASV242	0	15	0	0	0	0	0	0	0	0	0	647	0	0	0	0	0	662	Fungi{superkingdom}(100);Unassigned{phylum}(0);Unassigned{class}(0);Unassigned{order}(0);Unassigned{family}(0);Unassigned{genus}(0);Unassigned{species}(0)	Fungi	Unassigned	Unassigned	Unassigned	Unassigned	Unassigned	Unassigned
ASV243	4	0	0	0	69	6	0	0	0	0	0	0	0	0	0	0	0	79	Fungi{superkingdom}(84);Ascomycota{phylum}(84);Sordariomycetes{class}(84);Hypocreales{order}(84);Nectriaceae{family}(84);Fusicolla{genus}(84);Fusicolla_acetilerea{species}(84)	Fungi	Ascomycota	Sordariomycetes	Hypocreales	Nectriaceae	Fusicolla	Fusicolla_acetilerea
ASV245	0	0	0	0	21	5	0	0	0	0	0	0	0	0	0	0	0	26	Fungi{superkingdom}(93);Basidiomycota{phylum}(93);Agaricomycetes{class}(93);Agaricales{order}(93);Psathyrellaceae{family}(93);Coprinopsis{genus}(93);Coprinopsis_pseudofriesii{species}(93)	Fungi	Basidiomycota	Agaricomycetes	Agaricales	Psathyrellaceae	Coprinopsis	Coprinopsis_pseudofriesii
ASV246	56	11	0	0	16	0	0	0	0	0	0	0	0	11	0	0	0	94	Fungi{superkingdom}(100);Ascomycota{phylum}(100);Arthoniomycetes{class}(100);Lichenostigmatales{order}(100);Phaeococcomycetaceae{family}(100);Phaeococcomyces{genus}(100);unidentified{species}(100)	Fungi	Ascomycota	Arthoniomycetes	Lichenostigmatales	Phaeococcomycetaceae	Phaeococcomyces	unidentified
ASV247	0	565	284	0	0	0	0	0	0	0	0	60	0	0	0	0	0	909	Fungi{superkingdom}(99);Mortierellomycota{phylum}(99);Mortierellomycetes{class}(99);Mortierellales{order}(99);Mortierellaceae{family}(99);Mortierella{genus}(99);Mortierella_alpina{species}(99)	Fungi	Mortierellomycota	Mortierellomycetes	Mortierellales	Mortierellaceae	Mortierella	Mortierella_alpina
ASV248	0	213	0	0	855	0	0	0	0	49	0	0	154	0	585	0	0	1856	Fungi{superkingdom}(92);unidentified{phylum}(92);unidentified{class}(92);unidentified{order}(92);unidentified{family}(92);unidentified{genus}(92);unidentified{species}(92)	Fungi	unidentified	unidentified	unidentified	unidentified	unidentified	unidentified
ASV249	0	0	0	0	0	0	0	0	0	96	32	0	0	0	0	0	0	128	Fungi{superkingdom}(82);Ascomycota{phylum}(82);Eurotiomycetes{class}(82);Eurotiales{order}(82);Aspergillaceae{family}(82);Aspergillus{genus}(82);Aspergillus_felis{species}(82)	Fungi	Ascomycota	Eurotiomycetes	Eurotiales	Aspergillaceae	Aspergillus	Aspergillus_felis
ASV250	0	0	0	0	0	0	0	1050	0	0	0	0	1340	0	0	0	0	2390	Fungi{superkingdom}(100);Ascomycota{phylum}(100);Sordariomycetes{class}(100);Hypocreales{order}(100);Nectriaceae{family}(100);Ilyonectria{genus}(100);Ilyonectria_macrodidyma{species}(100)	Fungi	Ascomycota	Sordariomycetes	Hypocreales	Nectriaceae	Ilyonectria	Ilyonectria_macrodidyma
ASV252	0	0	0	0	0	0	0	0	0	0	0	0	2	0	0	0	0	2	Fungi{superkingdom}(100);Basidiomycota{phylum}(100);Agaricomycetes{class}(100);Polyporales{order}(100);Irpicaceae{family}(100);Ceriporia{genus}(100);Ceriporia_xylostromatoides{species}(100)	Fungi	Basidiomycota	Agaricomycetes	Polyporales	Irpicaceae	Ceriporia	Ceriporia_xylostromatoides
ASV255	0	0	0	0	0	0	0	0	90	0	0	0	0	0	0	0	0	90	Fungi{superkingdom}(65);Glomeromycota{phylum}(65);Glomeromycetes{class}(65);Glomerales{order}(65);Glomeraceae{family}(65);Septoglomus{genus}(65);unidentified{species}(65)	Fungi	Glomeromycota	Glomeromycetes	Glomerales	Glomeraceae	Septoglomus	unidentified
ASV257	0	0	0	0	0	0	0	0	0	2424	0	0	0	0	0	0	0	2424	Fungi{superkingdom}(99);Basidiomycota{phylum}(99);Agaricomycetes{class}(99);Agaricales{order}(99);Tricholomataceae{family}(99);Melanoleuca{genus}(99);Melanoleuca_griseobrunnea{species}(99)	Fungi	Basidiomycota	Agaricomycetes	Agaricales	Tricholomataceae	Melanoleuca	Melanoleuca_griseobrunnea
ASV258	0	0	0	0	0	0	0	0	0	0	0	36	0	0	0	0	0	36	Fungi{superkingdom}(88);Basidiomycota{phylum}(88);Agaricomycetes{class}(88);unidentified{order}(88);unidentified{family}(88);unidentified{genus}(88);unidentified{species}(88)	Fungi	Basidiomycota	Agaricomycetes	unidentified	unidentified	unidentified	unidentified
ASV259	0	0	0	0	0	0	0	2939	0	0	0	0	0	0	0	0	0	2939	Fungi{superkingdom}(100);Basidiomycota{phylum}(100);Agaricomycetes{class}(100);Agaricales{order}(100);Tricholomataceae{family}(100);Melanoleuca{genus}(100);Melanoleuca_griseobrunnea{species}(100)	Fungi	Basidiomycota	Agaricomycetes	Agaricales	Tricholomataceae	Melanoleuca	Melanoleuca_griseobrunnea
ASV260	1346	0	203	0	0	0	0	0	0	0	0	0	0	0	0	0	0	1549	Fungi{superkingdom}(95);unidentified{phylum}(95);unidentified{class}(95);unidentified{order}(95);unidentified{family}(95);unidentified{genus}(95);unidentified{species}(95)	Fungi	unidentified	unidentified	unidentified	unidentified	unidentified	unidentified
ASV262	0	0	0	0	11	0	0	0	0	0	0	0	0	0	0	0	0	11	Fungi{superkingdom}(96);Basidiomycota{phylum}(96);Agaricomycetes{class}(96);Cantharellales{order}(96);Ceratobasidiaceae{family}(96);Thanatephorus{genus}(96);Thanatephorus_cucumeris{species}(96)	Fungi	Basidiomycota	Agaricomycetes	Cantharellales	Ceratobasidiaceae	Thanatephorus	Thanatephorus_cucumeris
ASV263	35	395	142	0	9	0	66	0	31	0	0	39	0	0	404	0	0	1121	Fungi{superkingdom}(97);unidentified{phylum}(97);unidentified{class}(97);unidentified{order}(97);unidentified{family}(97);unidentified{genus}(97);unidentified{species}(97)	Fungi	unidentified	unidentified	unidentified	unidentified	unidentified	unidentified
ASV264	0	0	32	0	0	0	0	0	0	0	0	0	0	0	0	2840	0	2872	Fungi{superkingdom}(69);Basidiomycota{phylum}(69);Agaricomycetes{class}(69);Agaricales{order}(69);unidentified{family}(69);unidentified{genus}(69);unidentified{species}(69)	Fungi	Basidiomycota	Agaricomycetes	Agaricales	unidentified	unidentified	unidentified
ASV265	82	0	0	0	0	0	0	0	0	0	0	0	0	0	2741	0	0	2823	Fungi{superkingdom}(95);Basidiomycota{phylum}(95);Agaricomycetes{class}(95);Agaricales{order}(95);Bolbitiaceae{family}(95);Conocybe{genus}(95);Conocybe_velutipes{species}(95)	Fungi	Basidiomycota	Agaricomycetes	Agaricales	Bolbitiaceae	Conocybe	Conocybe_velutipes
ASV268	0	0	138	0	11	0	0	0	22	0	0	0	0	0	0	0	0	171	Fungi{superkingdom}(100);Ascomycota{phylum}(100);Dothideomycetes{class}(100);Pleosporales{order}(100);Phaeosphaeriaceae{family}(100);Setophoma{genus}(100);Setophoma_terrestris{species}(100)	Fungi	Ascomycota	Dothideomycetes	Pleosporales	Phaeosphaeriaceae	Setophoma	Setophoma_terrestris
ASV269	0	0	0	73	0	0	0	0	0	0	0	0	0	0	0	0	0	73	Fungi{superkingdom}(100);Unassigned{phylum}(0);Unassigned{class}(0);Unassigned{order}(0);Unassigned{family}(0);Unassigned{genus}(0);Unassigned{species}(0)	Fungi	Unassigned	Unassigned	Unassigned	Unassigned	Unassigned	Unassigned
ASV270	0	0	0	0	415	0	0	0	0	0	0	0	0	0	0	0	0	415	Fungi{superkingdom}(76);Basidiomycota{phylum}(76);Agaricomycetes{class}(76);Sebacinales{order}(76);unidentified{family}(76);unidentified{genus}(76);unidentified{species}(76)	Fungi	Basidiomycota	Agaricomycetes	Sebacinales	unidentified	unidentified	unidentified
ASV272	0	25	0	0	0	0	0	0	0	0	0	0	0	0	0	0	0	25	Fungi{superkingdom}(98);Ascomycota{phylum}(98);Eurotiomycetes{class}(98);Chaetothyriales{order}(98);Trichomeriaceae{family}(98);Knufia{genus}(98);Unassigned{species}(0)	Fungi	Ascomycota	Eurotiomycetes	Chaetothyriales	Trichomeriaceae	Knufia	Unassigned
ASV274	0	11	0	14	0	24	0	23	0	0	0	0	0	0	0	0	0	72	Fungi{superkingdom}(100);Ascomycota{phylum}(100);Sordariomycetes{class}(100);Hypocreales{order}(100);Bionectriaceae{family}(100);Gliomastix{genus}(100);unidentified{species}(100)	Fungi	Ascomycota	Sordariomycetes	Hypocreales	Bionectriaceae	Gliomastix	unidentified
ASV275	101	0	208	0	193	0	0	0	108	0	98	0	0	0	0	0	0	708	Fungi{superkingdom}(77);unidentified{phylum}(77);unidentified{class}(77);unidentified{order}(77);unidentified{family}(77);unidentified{genus}(77);unidentified{species}(77)	Fungi	unidentified	unidentified	unidentified	unidentified	unidentified	unidentified
ASV277	0	0	462	0	0	0	0	0	0	0	0	0	0	0	0	0	0	462	Fungi{superkingdom}(99);Basidiomycota{phylum}(99);Agaricomycetes{class}(99);Unassigned{order}(0);Unassigned{family}(0);Unassigned{genus}(0);Unassigned{species}(0)	Fungi	Basidiomycota	Agaricomycetes	Unassigned	Unassigned	Unassigned	Unassigned
ASV281	0	0	0	0	0	0	0	0	0	23	0	0	0	0	0	0	0	23	Fungi{superkingdom}(97);Ascomycota{phylum}(97);Dothideomycetes{class}(97);Pleosporales{order}(97);Didymellaceae{family}(97);Unassigned{genus}(0);Unassigned{species}(0)	Fungi	Ascomycota	Dothideomycetes	Pleosporales	Didymellaceae	Unassigned	Unassigned
ASV284	13	0	24	31	6	0	41	122	117	178	6	512	0	0	0	0	0	1050	Fungi{superkingdom}(83);unidentified{phylum}(83);unidentified{class}(83);unidentified{order}(83);unidentified{family}(83);unidentified{genus}(83);unidentified{species}(83)	Fungi	unidentified	unidentified	unidentified	unidentified	unidentified	unidentified
ASV285	0	0	0	0	0	0	0	0	0	94	0	0	0	32	27	116	0	269	Fungi{superkingdom}(100);Ascomycota{phylum}(100);Dothideomycetes{class}(100);Pleosporales{order}(100);Phaeosphaeriaceae{family}(100);Chaetosphaeronema{genus}(100);unidentified{species}(100)	Fungi	Ascomycota	Dothideomycetes	Pleosporales	Phaeosphaeriaceae	Chaetosphaeronema	unidentified
ASV286	0	0	0	0	6	0	0	0	0	0	0	0	0	0	0	0	0	6	Fungi{superkingdom}(99);Ascomycota{phylum}(99);Dothideomycetes{class}(99);Pleosporales{order}(99);Lentitheciaceae{family}(99);Keissleriella{genus}(99);Keissleriella_quadriseptata{species}(99)	Fungi	Ascomycota	Dothideomycetes	Pleosporales	Lentitheciaceae	Keissleriella	Keissleriella_quadriseptata
ASV287	0	0	0	0	0	0	0	0	2406	0	0	0	0	0	0	0	0	2406	Fungi{superkingdom}(66);unidentified{phylum}(66);unidentified{class}(66);unidentified{order}(66);unidentified{family}(66);unidentified{genus}(66);unidentified{species}(66)	Fungi	unidentified	unidentified	unidentified	unidentified	unidentified	unidentified
ASV288	0	7	0	0	0	0	0	0	0	0	0	0	0	0	0	0	0	7	Fungi{superkingdom}(94);Ascomycota{phylum}(94);Dothideomycetes{class}(94);Pleosporales{order}(94);Leptosphaeriaceae{family}(94);Sphaerellopsis{genus}(94);Sphaerellopsis_isthmospora{species}(94)	Fungi	Ascomycota	Dothideomycetes	Pleosporales	Leptosphaeriaceae	Sphaerellopsis	Sphaerellopsis_isthmospora
ASV289	43	0	0	0	0	0	0	0	0	0	0	85	0	0	0	0	0	128	Fungi{superkingdom}(91);Ascomycota{phylum}(91);Dothideomycetes{class}(91);Pleosporales{order}(91);Sporormiaceae{family}(91);Preussia{genus}(91);Preussia_flanaganii{species}(91)	Fungi	Ascomycota	Dothideomycetes	Pleosporales	Sporormiaceae	Preussia	Preussia_flanaganii
ASV290	0	13	0	3	0	37	0	0	0	0	0	0	0	0	0	0	0	53	Fungi{superkingdom}(99);Ascomycota{phylum}(99);Sordariomycetes{class}(99);Hypocreales{order}(99);Cordycipitaceae{family}(99);Lecanicillium{genus}(99);Lecanicillium_saksenae{species}(99)	Fungi	Ascomycota	Sordariomycetes	Hypocreales	Cordycipitaceae	Lecanicillium	Lecanicillium_saksenae
ASV293	0	0	0	54	0	0	0	0	0	0	0	0	0	0	0	0	0	54	Fungi{superkingdom}(97);Ascomycota{phylum}(97);Leotiomycetes{class}(97);Helotiales{order}(97);Helotiaceae{family}(97);Articulospora{genus}(97);unidentified{species}(97)	Fungi	Ascomycota	Leotiomycetes	Helotiales	Helotiaceae	Articulospora	unidentified
ASV298	177	0	0	48	0	0	0	0	0	0	0	0	0	110	0	0	7	342	Fungi{superkingdom}(82);Glomeromycota{phylum}(82);Glomeromycetes{class}(82);Glomerales{order}(82);Glomeraceae{family}(82);Glomus{genus}(82);Glomus_aggregatum{species}(82)	Fungi	Glomeromycota	Glomeromycetes	Glomerales	Glomeraceae	Glomus	Glomus_aggregatum
ASV299	0	4	0	5	0	0	0	0	0	0	0	0	0	0	0	0	68	77	Fungi{superkingdom}(79);Ascomycota{phylum}(79);Dothideomycetes{class}(79);Pleosporales{order}(79);Didymosphaeriaceae{family}(79);Laburnicola{genus}(79);Unassigned{species}(0)	Fungi	Ascomycota	Dothideomycetes	Pleosporales	Didymosphaeriaceae	Laburnicola	Unassigned
ASV300	0	0	59	0	0	10	0	0	0	0	0	0	0	0	0	0	0	69	Fungi{superkingdom}(100);Unassigned{phylum}(0);Unassigned{class}(0);Unassigned{order}(0);Unassigned{family}(0);Unassigned{genus}(0);Unassigned{species}(0)	Fungi	Unassigned	Unassigned	Unassigned	Unassigned	Unassigned	Unassigned
ASV301	36	11	0	0	6	0	0	0	0	0	0	0	0	0	0	0	0	53	Fungi{superkingdom}(84);unidentified{phylum}(84);unidentified{class}(84);unidentified{order}(84);unidentified{family}(84);unidentified{genus}(84);unidentified{species}(84)	Fungi	unidentified	unidentified	unidentified	unidentified	unidentified	unidentified
ASV302	0	0	0	0	0	0	0	0	0	0	0	0	0	0	2362	0	0	2362	Fungi{superkingdom}(87);Ascomycota{phylum}(87);Unassigned{class}(0);Unassigned{order}(0);Unassigned{family}(0);Unassigned{genus}(0);Unassigned{species}(0)	Fungi	Ascomycota	Unassigned	Unassigned	Unassigned	Unassigned	Unassigned
ASV304	0	0	0	0	0	0	0	0	0	0	0	20	0	0	0	0	0	20	Fungi{superkingdom}(75);unidentified{phylum}(75);unidentified{class}(75);unidentified{order}(75);unidentified{family}(75);unidentified{genus}(75);unidentified{species}(75)	Fungi	unidentified	unidentified	unidentified	unidentified	unidentified	unidentified
ASV305	32	8	0	0	0	0	0	0	0	0	0	0	0	0	0	0	0	40	Fungi{superkingdom}(94);Ascomycota{phylum}(94);Dothideomycetes{class}(94);Pleosporales{order}(94);Sporormiaceae{family}(94);Sparticola{genus}(94);Sparticola_forlicesenae{species}(94)	Fungi	Ascomycota	Dothideomycetes	Pleosporales	Sporormiaceae	Sparticola	Sparticola_forlicesenae
ASV307	0	0	0	0	206	206	0	0	0	0	0	0	0	0	0	0	0	412	Fungi{superkingdom}(100);Glomeromycota{phylum}(100);Glomeromycetes{class}(100);Glomerales{order}(100);Glomeraceae{family}(100);Unassigned{genus}(0);Unassigned{species}(0)	Fungi	Glomeromycota	Glomeromycetes	Glomerales	Glomeraceae	Unassigned	Unassigned
ASV309	0	0	550	0	0	0	0	0	0	0	0	0	0	0	0	0	0	550	Fungi{superkingdom}(69);Ascomycota{phylum}(69);Sordariomycetes{class}(69);Hypocreales{order}(69);Hypocreaceae{family}(69);Trichoderma{genus}(69);Trichoderma_aggressivum{species}(69)	Fungi	Ascomycota	Sordariomycetes	Hypocreales	Hypocreaceae	Trichoderma	Trichoderma_aggressivum
ASV310	0	0	0	0	0	0	0	0	0	0	0	0	0	0	1393	0	0	1393	Fungi{superkingdom}(79);Basidiomycota{phylum}(79);Agaricomycetes{class}(79);Cantharellales{order}(79);Ceratobasidiaceae{family}(79);unidentified{genus}(79);unidentified{species}(79)	Fungi	Basidiomycota	Agaricomycetes	Cantharellales	Ceratobasidiaceae	unidentified	unidentified
ASV311	10	0	0	0	0	0	0	0	0	0	0	0	0	0	0	0	0	10	Fungi{superkingdom}(75);Basidiomycota{phylum}(75);Tremellomycetes{class}(75);Filobasidiales{order}(75);Filobasidiaceae{family}(75);Filobasidium{genus}(75);Filobasidium_oeirense{species}(75)	Fungi	Basidiomycota	Tremellomycetes	Filobasidiales	Filobasidiaceae	Filobasidium	Filobasidium_oeirense
ASV312	17	33	5	23	10	0	0	0	0	0	0	0	0	0	0	0	0	88	Fungi{superkingdom}(73);Ascomycota{phylum}(73);Eurotiomycetes{class}(73);Chaetothyriales{order}(73);unidentified{family}(73);unidentified{genus}(73);unidentified{species}(73)	Fungi	Ascomycota	Eurotiomycetes	Chaetothyriales	unidentified	unidentified	unidentified
ASV313	0	1915	0	0	0	0	0	0	0	0	0	0	0	0	0	0	0	1915	Fungi{superkingdom}(92);Ascomycota{phylum}(92);Sordariomycetes{class}(92);Microascales{order}(92);Microascaceae{family}(92);Cephalotrichum{genus}(92);Cephalotrichum_microsporum{species}(92)	Fungi	Ascomycota	Sordariomycetes	Microascales	Microascaceae	Cephalotrichum	Cephalotrichum_microsporum
ASV314	103	0	0	0	0	0	0	0	0	0	0	0	0	0	0	0	0	103	Fungi{superkingdom}(84);unidentified{phylum}(84);unidentified{class}(84);unidentified{order}(84);unidentified{family}(84);unidentified{genus}(84);unidentified{species}(84)	Fungi	unidentified	unidentified	unidentified	unidentified	unidentified	unidentified
ASV316	0	113	0	19	37	6	0	0	0	0	0	0	0	0	0	0	0	175	Fungi{superkingdom}(96);Ascomycota{phylum}(96);Sordariomycetes{class}(96);Sordariales{order}(96);Chaetomiaceae{family}(96);unidentified{genus}(96);unidentified{species}(96)	Fungi	Ascomycota	Sordariomycetes	Sordariales	Chaetomiaceae	unidentified	unidentified
ASV319	0	652	0	0	0	0	0	0	0	0	0	0	0	1501	0	0	0	2153	Fungi{superkingdom}(71);Ascomycota{phylum}(71);Dothideomycetes{class}(71);Pleosporales{order}(71);Lophiostomataceae{family}(71);Lophiostoma{genus}(71);Lophiostoma_rosae{species}(71)	Fungi	Ascomycota	Dothideomycetes	Pleosporales	Lophiostomataceae	Lophiostoma	Lophiostoma_rosae
ASV320	0	0	0	0	0	0	0	0	0	0	0	1901	0	0	0	209	0	2110	Fungi{superkingdom}(61);unidentified{phylum}(61);unidentified{class}(61);unidentified{order}(61);unidentified{family}(61);unidentified{genus}(61);unidentified{species}(61)	Fungi	unidentified	unidentified	unidentified	unidentified	unidentified	unidentified
ASV322	70	0	79	8	147	51	0	24	56	57	0	0	6	0	0	0	31	529	Fungi{superkingdom}(94);unidentified{phylum}(94);unidentified{class}(94);unidentified{order}(94);unidentified{family}(94);unidentified{genus}(94);unidentified{species}(94)	Fungi	unidentified	unidentified	unidentified	unidentified	unidentified	unidentified
ASV323	0	7	0	0	0	0	0	0	0	0	0	0	0	0	0	0	0	7	Fungi{superkingdom}(65);Ascomycota{phylum}(65);Sordariomycetes{class}(65);Unassigned{order}(0);Unassigned{family}(0);Unassigned{genus}(0);Unassigned{species}(0)	Fungi	Ascomycota	Sordariomycetes	Unassigned	Unassigned	Unassigned	Unassigned
ASV324	0	17	0	66	0	0	0	0	0	25	0	0	0	0	0	0	0	108	Fungi{superkingdom}(66);Ascomycota{phylum}(66);Dothideomycetes{class}(66);Dothideales{order}(66);Aureobasidiaceae{family}(66);Unassigned{genus}(0);Unassigned{species}(0)	Fungi	Ascomycota	Dothideomycetes	Dothideales	Aureobasidiaceae	Unassigned	Unassigned
ASV325	0	0	0	0	0	0	0	0	0	0	0	0	0	42	0	39	0	81	Fungi{superkingdom}(100);Ascomycota{phylum}(100);Dothideomycetes{class}(100);Pleosporales{order}(100);Didymosphaeriaceae{family}(100);Kalmusia{genus}(100);unidentified{species}(100)	Fungi	Ascomycota	Dothideomycetes	Pleosporales	Didymosphaeriaceae	Kalmusia	unidentified
ASV326	0	0	0	0	0	0	0	0	0	26	0	0	0	0	0	0	0	26	Fungi{superkingdom}(88);Ascomycota{phylum}(88);Sordariomycetes{class}(88);Unassigned{order}(0);Unassigned{family}(0);Unassigned{genus}(0);Unassigned{species}(0)	Fungi	Ascomycota	Sordariomycetes	Unassigned	Unassigned	Unassigned	Unassigned
ASV327	0	2062	0	0	0	0	0	0	0	0	0	0	0	0	0	0	0	2062	Fungi{superkingdom}(100);Ascomycota{phylum}(100);Pezizomycetes{class}(100);Pezizales{order}(100);Pezizaceae{family}(100);Eremiomyces{genus}(100);Eremiomyces_echinulatus{species}(100)	Fungi	Ascomycota	Pezizomycetes	Pezizales	Pezizaceae	Eremiomyces	Eremiomyces_echinulatus
ASV328	0	0	0	0	0	0	0	0	0	127	0	431	0	0	0	0	0	558	Fungi{superkingdom}(62);unidentified{phylum}(62);unidentified{class}(62);unidentified{order}(62);unidentified{family}(62);unidentified{genus}(62);unidentified{species}(62)	Fungi	unidentified	unidentified	unidentified	unidentified	unidentified	unidentified
ASV329	1084	0	0	0	0	24	47	0	0	0	0	0	0	0	0	0	0	1155	Fungi{superkingdom}(62);Basidiomycota{phylum}(62);Agaricomycetes{class}(62);Agaricales{order}(62);Agaricaceae{family}(62);Agaricus{genus}(62);unidentified{species}(62)	Fungi	Basidiomycota	Agaricomycetes	Agaricales	Agaricaceae	Agaricus	unidentified
ASV330	0	0	0	0	0	0	0	0	24	109	150	124	16	44	167	32	0	666	Fungi{superkingdom}(66);Ascomycota{phylum}(66);Dothideomycetes{class}(66);Pleosporales{order}(66);Cucurbitariaceae{family}(66);Pyrenochaetopsis{genus}(66);Pyrenochaetopsis_leptospora{species}(66)	Fungi	Ascomycota	Dothideomycetes	Pleosporales	Cucurbitariaceae	Pyrenochaetopsis	Pyrenochaetopsis_leptospora
ASV332	0	21	0	0	8	0	0	0	0	0	0	0	0	0	0	0	0	29	Fungi{superkingdom}(100);Unassigned{phylum}(0);Unassigned{class}(0);Unassigned{order}(0);Unassigned{family}(0);Unassigned{genus}(0);Unassigned{species}(0)	Fungi	Unassigned	Unassigned	Unassigned	Unassigned	Unassigned	Unassigned
ASV333	0	25	0	0	0	5	0	0	0	0	0	0	0	0	0	0	0	30	Fungi{superkingdom}(98);Ascomycota{phylum}(98);Dothideomycetes{class}(98);Pleosporales{order}(98);Didymellaceae{family}(98);Didymella{genus}(98);Didymella_urticicola{species}(98)	Fungi	Ascomycota	Dothideomycetes	Pleosporales	Didymellaceae	Didymella	Didymella_urticicola
ASV334	3	0	0	0	0	0	0	0	0	0	0	0	0	0	0	0	0	3	Fungi{superkingdom}(100);Ascomycota{phylum}(100);Dothideomycetes{class}(100);Pleosporales{order}(100);Pleosporaceae{family}(100);Exserohilum{genus}(100);Exserohilum_rostratum{species}(100)	Fungi	Ascomycota	Dothideomycetes	Pleosporales	Pleosporaceae	Exserohilum	Exserohilum_rostratum
ASV338	0	0	0	0	0	0	0	0	76	52	19	44	0	0	354	0	0	545	Fungi{superkingdom}(100);Unassigned{phylum}(0);Unassigned{class}(0);Unassigned{order}(0);Unassigned{family}(0);Unassigned{genus}(0);Unassigned{species}(0)	Fungi	Unassigned	Unassigned	Unassigned	Unassigned	Unassigned	Unassigned
ASV339	0	0	48	79	0	0	0	0	48	0	0	0	0	0	0	0	0	175	Fungi{superkingdom}(62);unidentified{phylum}(62);unidentified{class}(62);unidentified{order}(62);unidentified{family}(62);unidentified{genus}(62);unidentified{species}(62)	Fungi	unidentified	unidentified	unidentified	unidentified	unidentified	unidentified
ASV340	0	0	0	0	0	0	0	0	0	0	0	0	0	0	0	39	0	39	Fungi{superkingdom}(65);Ascomycota{phylum}(65);Sordariomycetes{class}(65);unidentified{order}(65);unidentified{family}(65);unidentified{genus}(65);unidentified{species}(65)	Fungi	Ascomycota	Sordariomycetes	unidentified	unidentified	unidentified	unidentified
ASV342	0	13	0	35	0	0	0	0	0	17	0	0	0	0	0	0	0	65	Fungi{superkingdom}(100);Ascomycota{phylum}(100);Dothideomycetes{class}(100);Dothideomycetes_ord_Incertae_sedis{order}(100);Eremomycetaceae{family}(100);Rhexothecium{genus}(100);unidentified{species}(100)	Fungi	Ascomycota	Dothideomycetes	Dothideomycetes_ord_Incertae_sedis	Eremomycetaceae	Rhexothecium	unidentified
ASV344	0	80	0	0	0	0	0	0	0	0	0	0	0	0	0	0	0	80	Fungi{superkingdom}(100);Ascomycota{phylum}(100);Sordariomycetes{class}(100);Hypocreales{order}(100);Clavicipitaceae{family}(100);Metarhizium{genus}(100);Metarhizium_marquandii{species}(100)	Fungi	Ascomycota	Sordariomycetes	Hypocreales	Clavicipitaceae	Metarhizium	Metarhizium_marquandii
ASV346	0	0	0	12	0	0	0	0	0	128	0	0	0	0	0	0	0	140	Fungi{superkingdom}(100);Ascomycota{phylum}(100);Sordariomycetes{class}(100);Hypocreales{order}(100);Stachybotryaceae{family}(100);Unassigned{genus}(0);Unassigned{species}(0)	Fungi	Ascomycota	Sordariomycetes	Hypocreales	Stachybotryaceae	Unassigned	Unassigned
ASV347	122	0	0	0	0	0	0	0	0	0	0	0	0	0	0	0	0	122	Fungi{superkingdom}(77);Basidiomycota{phylum}(77);Agaricomycetes{class}(77);unidentified{order}(77);unidentified{family}(77);unidentified{genus}(77);unidentified{species}(77)	Fungi	Basidiomycota	Agaricomycetes	unidentified	unidentified	unidentified	unidentified
ASV352	0	0	0	0	0	0	0	0	0	0	0	0	0	200	0	0	0	200	Fungi{superkingdom}(79);Ascomycota{phylum}(79);Sordariomycetes{class}(79);Sordariales{order}(79);Chaetomiaceae{family}(79);Acrophialophora{genus}(79);Acrophialophora_hechuanensis{species}(79)	Fungi	Ascomycota	Sordariomycetes	Sordariales	Chaetomiaceae	Acrophialophora	Acrophialophora_hechuanensis
ASV355	0	181	0	0	0	0	0	0	122	0	10	9	0	0	0	0	0	322	Fungi{superkingdom}(68);Ascomycota{phylum}(68);Sordariomycetes{class}(68);Sordariales{order}(68);Unassigned{family}(0);Unassigned{genus}(0);Unassigned{species}(0)	Fungi	Ascomycota	Sordariomycetes	Sordariales	Unassigned	Unassigned	Unassigned
ASV356	0	0	115	0	0	0	0	0	0	0	0	0	0	0	0	0	0	115	Fungi{superkingdom}(88);Basidiomycota{phylum}(88);Agaricomycetes{class}(88);Cantharellales{order}(88);Ceratobasidiaceae{family}(88);unidentified{genus}(88);unidentified{species}(88)	Fungi	Basidiomycota	Agaricomycetes	Cantharellales	Ceratobasidiaceae	unidentified	unidentified
ASV358	15	0	0	0	0	0	0	0	0	0	0	0	0	0	0	0	0	15	Fungi{superkingdom}(88);Ascomycota{phylum}(88);Dothideomycetes{class}(88);Pleosporales{order}(88);Pleosporaceae{family}(88);Comoclathris{genus}(88);unidentified{species}(88)	Fungi	Ascomycota	Dothideomycetes	Pleosporales	Pleosporaceae	Comoclathris	unidentified
ASV360	0	12	0	0	0	0	0	0	0	0	0	0	0	0	0	0	0	12	Fungi{superkingdom}(100);Chytridiomycota{phylum}(100);Spizellomycetes{class}(100);Spizellomycetales{order}(100);Powellomycetaceae{family}(100);Powellomyces{genus}(100);unidentified{species}(100)	Fungi	Chytridiomycota	Spizellomycetes	Spizellomycetales	Powellomycetaceae	Powellomyces	unidentified
ASV363	0	0	0	0	0	15	0	0	0	0	0	0	0	0	0	0	0	15	Fungi{superkingdom}(100);Basidiomycota{phylum}(100);Agaricomycetes{class}(100);Corticiales{order}(100);Corticiaceae{family}(100);Limonomyces{genus}(100);unidentified{species}(100)	Fungi	Basidiomycota	Agaricomycetes	Corticiales	Corticiaceae	Limonomyces	unidentified
ASV364	118	224	0	0	0	0	0	0	0	0	0	0	0	0	1015	0	0	1357	Fungi{superkingdom}(100);Unassigned{phylum}(0);Unassigned{class}(0);Unassigned{order}(0);Unassigned{family}(0);Unassigned{genus}(0);Unassigned{species}(0)	Fungi	Unassigned	Unassigned	Unassigned	Unassigned	Unassigned	Unassigned
ASV366	120	167	21	0	41	72	0	0	0	0	0	0	0	0	0	0	0	421	Fungi{superkingdom}(84);unidentified{phylum}(84);unidentified{class}(84);unidentified{order}(84);unidentified{family}(84);unidentified{genus}(84);unidentified{species}(84)	Fungi	unidentified	unidentified	unidentified	unidentified	unidentified	unidentified
ASV367	2	0	0	0	13	12	0	0	0	0	0	0	0	0	0	0	0	27	Fungi{superkingdom}(99);Ascomycota{phylum}(99);Dothideomycetes{class}(99);Botryosphaeriales{order}(99);Botryosphaeriaceae{family}(99);Macrophoma{genus}(99);unidentified{species}(99)	Fungi	Ascomycota	Dothideomycetes	Botryosphaeriales	Botryosphaeriaceae	Macrophoma	unidentified
ASV370	0	22	0	0	0	0	0	0	0	0	3	0	0	0	38	0	0	63	Fungi{superkingdom}(100);Ascomycota{phylum}(100);Sordariomycetes{class}(100);Sordariales{order}(100);Chaetomiaceae{family}(100);Chaetomium{genus}(100);Chaetomium_elatum{species}(100)	Fungi	Ascomycota	Sordariomycetes	Sordariales	Chaetomiaceae	Chaetomium	Chaetomium_elatum
ASV371	0	0	0	6	0	0	0	0	0	0	902	0	0	0	0	0	0	908	Fungi{superkingdom}(100);Ascomycota{phylum}(100);Eurotiomycetes{class}(100);Onygenales{order}(100);Onygenales_fam_Incertae_sedis{family}(100);Chrysosporium{genus}(100);Chrysosporium_lobatum{species}(100)	Fungi	Ascomycota	Eurotiomycetes	Onygenales	Onygenales_fam_Incertae_sedis	Chrysosporium	Chrysosporium_lobatum
ASV372	0	20	0	0	0	0	0	0	0	0	0	0	0	0	0	0	0	20	Fungi{superkingdom}(100);Ascomycota{phylum}(100);Dothideomycetes{class}(100);Pleosporales{order}(100);Lentitheciaceae{family}(100);Keissleriella{genus}(100);Unassigned{species}(0)	Fungi	Ascomycota	Dothideomycetes	Pleosporales	Lentitheciaceae	Keissleriella	Unassigned
ASV373	0	0	0	0	0	0	0	0	0	179	0	0	0	118	0	0	0	297	Fungi{superkingdom}(79);unidentified{phylum}(79);unidentified{class}(79);unidentified{order}(79);unidentified{family}(79);unidentified{genus}(79);unidentified{species}(79)	Fungi	unidentified	unidentified	unidentified	unidentified	unidentified	unidentified
ASV378	0	0	0	0	0	0	0	0	0	1603	0	0	0	0	0	0	0	1603	Fungi{superkingdom}(100);Mucoromycota{phylum}(100);Mucoromycetes{class}(100);Mucorales{order}(100);Rhizopodaceae{family}(100);Rhizopus{genus}(100);Rhizopus_microsporus{species}(100)	Fungi	Mucoromycota	Mucoromycetes	Mucorales	Rhizopodaceae	Rhizopus	Rhizopus_microsporus
ASV379	0	287	0	0	0	0	0	274	0	0	0	0	0	0	0	0	0	561	Fungi{superkingdom}(100);Ascomycota{phylum}(100);Dothideomycetes{class}(100);Pleosporales{order}(100);Phaeosphaeriaceae{family}(100);Paraphoma{genus}(100);Paraphoma_radicina{species}(100)	Fungi	Ascomycota	Dothideomycetes	Pleosporales	Phaeosphaeriaceae	Paraphoma	Paraphoma_radicina
ASV380	0	3	0	0	0	0	0	0	0	0	0	117	0	0	0	35	0	155	Fungi{superkingdom}(97);unidentified{phylum}(97);unidentified{class}(97);unidentified{order}(97);unidentified{family}(97);unidentified{genus}(97);unidentified{species}(97)	Fungi	unidentified	unidentified	unidentified	unidentified	unidentified	unidentified
ASV381	0	24	0	0	8	0	0	0	0	0	0	0	0	0	0	0	0	32	Fungi{superkingdom}(85);Ascomycota{phylum}(85);Dothideomycetes{class}(85);Pleosporales{order}(85);Phaeosphaeriaceae{family}(85);Allophaeosphaeria{genus}(85);Allophaeosphaeria_muriformia{species}(85)	Fungi	Ascomycota	Dothideomycetes	Pleosporales	Phaeosphaeriaceae	Allophaeosphaeria	Allophaeosphaeria_muriformia
ASV382	54	0	0	271	17	0	62	397	102	0	0	0	0	0	0	0	0	903	Fungi{superkingdom}(94);unidentified{phylum}(94);unidentified{class}(94);unidentified{order}(94);unidentified{family}(94);unidentified{genus}(94);unidentified{species}(94)	Fungi	unidentified	unidentified	unidentified	unidentified	unidentified	unidentified
ASV385	0	300	0	0	59	0	0	0	0	0	0	0	0	0	0	0	0	359	Fungi{superkingdom}(100);Ascomycota{phylum}(100);Sordariomycetes{class}(100);Sordariales{order}(100);Chaetomiaceae{family}(100);Unassigned{genus}(0);Unassigned{species}(0)	Fungi	Ascomycota	Sordariomycetes	Sordariales	Chaetomiaceae	Unassigned	Unassigned
ASV386	0	0	0	0	0	16	9	0	0	0	0	0	0	0	0	0	0	25	Fungi{superkingdom}(65);Ascomycota{phylum}(65);Unassigned{class}(0);Unassigned{order}(0);Unassigned{family}(0);Unassigned{genus}(0);Unassigned{species}(0)	Fungi	Ascomycota	Unassigned	Unassigned	Unassigned	Unassigned	Unassigned
ASV387	14	29	21	6	0	0	0	0	0	0	0	0	0	0	0	0	0	70	Fungi{superkingdom}(95);Basidiomycota{phylum}(95);Tremellomycetes{class}(95);Tremellales{order}(95);Bulleribasidiaceae{family}(95);Dioszegia{genus}(95);Dioszegia_takashimae{species}(95)	Fungi	Basidiomycota	Tremellomycetes	Tremellales	Bulleribasidiaceae	Dioszegia	Dioszegia_takashimae
ASV388	0	0	1553	0	0	0	0	0	0	0	0	0	0	0	0	0	0	1553	Fungi{superkingdom}(100);Unassigned{phylum}(0);Unassigned{class}(0);Unassigned{order}(0);Unassigned{family}(0);Unassigned{genus}(0);Unassigned{species}(0)	Fungi	Unassigned	Unassigned	Unassigned	Unassigned	Unassigned	Unassigned
ASV392	382	0	0	38	0	0	0	0	0	0	0	0	0	0	0	0	0	420	Fungi{superkingdom}(100);Glomeromycota{phylum}(100);Glomeromycetes{class}(100);Glomerales{order}(100);Glomeraceae{family}(100);Unassigned{genus}(0);Unassigned{species}(0)	Fungi	Glomeromycota	Glomeromycetes	Glomerales	Glomeraceae	Unassigned	Unassigned
ASV393	0	4	0	0	0	0	0	0	0	0	0	0	0	0	0	0	0	4	Fungi{superkingdom}(87);Ascomycota{phylum}(87);Dothideomycetes{class}(87);Botryosphaeriales{order}(87);Aplosporellaceae{family}(87);Aplosporella{genus}(87);Aplosporella_africana{species}(87)	Fungi	Ascomycota	Dothideomycetes	Botryosphaeriales	Aplosporellaceae	Aplosporella	Aplosporella_africana
ASV396	37	6	0	0	0	0	0	0	0	0	0	0	0	0	0	0	0	43	Fungi{superkingdom}(100);Ascomycota{phylum}(100);Dothideomycetes{class}(100);Pleosporales{order}(100);Lentitheciaceae{family}(100);Keissleriella{genus}(100);Keissleriella_quadriseptata{species}(100)	Fungi	Ascomycota	Dothideomycetes	Pleosporales	Lentitheciaceae	Keissleriella	Keissleriella_quadriseptata
ASV399	0	0	0	0	0	0	0	0	0	39	0	0	0	61	0	14	53	167	Fungi{superkingdom}(77);Ascomycota{phylum}(77);Sordariomycetes{class}(77);Xylariales{order}(77);Diatrypaceae{family}(77);Monosporascus{genus}(77);Unassigned{species}(0)	Fungi	Ascomycota	Sordariomycetes	Xylariales	Diatrypaceae	Monosporascus	Unassigned
ASV400	0	0	0	0	417	0	0	0	0	13	0	0	0	0	0	0	0	430	Fungi{superkingdom}(73);Ascomycota{phylum}(73);Sordariomycetes{class}(73);Sordariales{order}(73);unidentified{family}(73);unidentified{genus}(73);unidentified{species}(73)	Fungi	Ascomycota	Sordariomycetes	Sordariales	unidentified	unidentified	unidentified
ASV401	20	0	0	0	0	0	0	0	0	0	0	0	0	0	0	0	0	20	Fungi{superkingdom}(96);Ascomycota{phylum}(96);Dothideomycetes{class}(96);Pleosporales{order}(96);Unassigned{family}(0);Unassigned{genus}(0);Unassigned{species}(0)	Fungi	Ascomycota	Dothideomycetes	Pleosporales	Unassigned	Unassigned	Unassigned
ASV402	0	19	8	0	0	0	0	31	0	0	84	505	0	0	0	0	0	647	Fungi{superkingdom}(61);Ascomycota{phylum}(61);Dothideomycetes{class}(61);Pleosporales{order}(61);unidentified{family}(61);unidentified{genus}(61);unidentified{species}(61)	Fungi	Ascomycota	Dothideomycetes	Pleosporales	unidentified	unidentified	unidentified
ASV403	0	0	0	14	0	0	0	0	0	0	0	0	0	0	0	0	16	30	Fungi{superkingdom}(76);Ascomycota{phylum}(76);Eurotiomycetes{class}(76);Eurotiales{order}(76);Trichocomaceae{family}(76);Talaromyces{genus}(76);Unassigned{species}(0)	Fungi	Ascomycota	Eurotiomycetes	Eurotiales	Trichocomaceae	Talaromyces	Unassigned
ASV404	0	0	0	0	52	0	0	0	0	0	0	0	0	0	1107	0	0	1159	Fungi{superkingdom}(62);unidentified{phylum}(62);unidentified{class}(62);unidentified{order}(62);unidentified{family}(62);unidentified{genus}(62);unidentified{species}(62)	Fungi	unidentified	unidentified	unidentified	unidentified	unidentified	unidentified
ASV405	0	0	0	0	0	0	0	0	0	0	0	14	0	0	0	0	0	14	Fungi{superkingdom}(100);Ascomycota{phylum}(100);Pezizomycetes{class}(100);Pezizales{order}(100);Ascobolaceae{family}(100);unidentified{genus}(100);unidentified{species}(100)	Fungi	Ascomycota	Pezizomycetes	Pezizales	Ascobolaceae	unidentified	unidentified
ASV407	6	770	0	0	0	5	0	0	0	56	0	49	0	14	27	0	0	927	Fungi{superkingdom}(89);Ascomycota{phylum}(89);Eurotiomycetes{class}(89);Eurotiales{order}(89);Aspergillaceae{family}(89);Unassigned{genus}(0);Unassigned{species}(0)	Fungi	Ascomycota	Eurotiomycetes	Eurotiales	Aspergillaceae	Unassigned	Unassigned
ASV408	0	0	0	0	0	0	0	0	0	0	0	0	1139	0	0	0	0	1139	Fungi{superkingdom}(98);Basidiomycota{phylum}(98);Agaricomycetes{class}(98);Unassigned{order}(0);Unassigned{family}(0);Unassigned{genus}(0);Unassigned{species}(0)	Fungi	Basidiomycota	Agaricomycetes	Unassigned	Unassigned	Unassigned	Unassigned
ASV409	0	0	0	0	667	0	0	0	0	0	0	0	0	0	0	0	0	667	Fungi{superkingdom}(69);unidentified{phylum}(69);unidentified{class}(69);unidentified{order}(69);unidentified{family}(69);unidentified{genus}(69);unidentified{species}(69)	Fungi	unidentified	unidentified	unidentified	unidentified	unidentified	unidentified
ASV410	45	14	0	0	0	0	0	0	0	0	0	0	0	0	0	0	0	59	Fungi{superkingdom}(72);unidentified{phylum}(72);unidentified{class}(72);unidentified{order}(72);unidentified{family}(72);unidentified{genus}(72);unidentified{species}(72)	Fungi	unidentified	unidentified	unidentified	unidentified	unidentified	unidentified
ASV413	0	0	0	58	0	0	0	0	0	0	0	0	0	0	0	0	0	58	Fungi{superkingdom}(100);Ascomycota{phylum}(100);Eurotiomycetes{class}(100);Chaetothyriales{order}(100);Trichomeriaceae{family}(100);Knufia{genus}(100);Knufia_aspidiotus{species}(100)	Fungi	Ascomycota	Eurotiomycetes	Chaetothyriales	Trichomeriaceae	Knufia	Knufia_aspidiotus
ASV414	0	6	0	0	2	0	0	0	0	0	0	0	0	0	0	0	0	8	Fungi{superkingdom}(100);Unassigned{phylum}(0);Unassigned{class}(0);Unassigned{order}(0);Unassigned{family}(0);Unassigned{genus}(0);Unassigned{species}(0)	Fungi	Unassigned	Unassigned	Unassigned	Unassigned	Unassigned	Unassigned
ASV415	0	0	0	0	0	0	0	0	0	0	0	0	0	0	0	1300	0	1300	Fungi{superkingdom}(83);unidentified{phylum}(83);unidentified{class}(83);unidentified{order}(83);unidentified{family}(83);unidentified{genus}(83);unidentified{species}(83)	Fungi	unidentified	unidentified	unidentified	unidentified	unidentified	unidentified
ASV418	2	0	0	0	0	0	0	26	4	188	0	303	0	0	0	0	0	523	Fungi{superkingdom}(100);Unassigned{phylum}(0);Unassigned{class}(0);Unassigned{order}(0);Unassigned{family}(0);Unassigned{genus}(0);Unassigned{species}(0)	Fungi	Unassigned	Unassigned	Unassigned	Unassigned	Unassigned	Unassigned
ASV420	0	49	0	0	0	11	0	0	0	49	0	0	38	23	0	95	0	265	Fungi{superkingdom}(76);unidentified{phylum}(76);unidentified{class}(76);unidentified{order}(76);unidentified{family}(76);unidentified{genus}(76);unidentified{species}(76)	Fungi	unidentified	unidentified	unidentified	unidentified	unidentified	unidentified
ASV421	41	0	0	0	0	0	0	0	0	29	0	0	0	0	0	0	0	70	Fungi{superkingdom}(100);Ascomycota{phylum}(100);Sordariomycetes{class}(100);Sordariales{order}(100);Chaetomiaceae{family}(100);Thielavia{genus}(100);Thielavia_arenaria{species}(100)	Fungi	Ascomycota	Sordariomycetes	Sordariales	Chaetomiaceae	Thielavia	Thielavia_arenaria
ASV422	105	0	63	10	41	60	0	0	0	0	0	0	0	0	0	0	0	279	Fungi{superkingdom}(98);Glomeromycota{phylum}(98);Glomeromycetes{class}(98);Glomerales{order}(98);Glomeraceae{family}(98);Unassigned{genus}(0);Unassigned{species}(0)	Fungi	Glomeromycota	Glomeromycetes	Glomerales	Glomeraceae	Unassigned	Unassigned
ASV423	0	311	0	0	0	0	0	0	0	0	0	95	0	0	0	0	0	406	Fungi{superkingdom}(96);Ascomycota{phylum}(96);Eurotiomycetes{class}(96);Chaetothyriales{order}(96);Trichomeriaceae{family}(96);Knufia{genus}(96);Knufia_tsunedae{species}(96)	Fungi	Ascomycota	Eurotiomycetes	Chaetothyriales	Trichomeriaceae	Knufia	Knufia_tsunedae
ASV424	0	0	0	0	0	0	0	0	0	0	0	0	0	0	0	0	30	30	Fungi{superkingdom}(100);Mortierellomycota{phylum}(100);Mortierellomycetes{class}(100);Mortierellales{order}(100);Mortierellaceae{family}(100);Mortierella{genus}(100);Unassigned{species}(0)	Fungi	Mortierellomycota	Mortierellomycetes	Mortierellales	Mortierellaceae	Mortierella	Unassigned
ASV425	0	15	0	0	0	0	0	0	0	0	0	0	0	0	0	0	0	15	Fungi{superkingdom}(100);Ascomycota{phylum}(100);Dothideomycetes{class}(100);Pleosporales{order}(100);Pleosporales_fam_Incertae_sedis{family}(100);Thyrostroma{genus}(100);Thyrostroma_cornicola{species}(100)	Fungi	Ascomycota	Dothideomycetes	Pleosporales	Pleosporales_fam_Incertae_sedis	Thyrostroma	Thyrostroma_cornicola
ASV426	0	0	0	0	6	0	0	0	0	0	0	0	0	0	0	0	0	6	Fungi{superkingdom}(99);Ascomycota{phylum}(99);Eurotiomycetes{class}(99);Chaetothyriales{order}(99);Trichomeriaceae{family}(99);Knufia{genus}(99);Unassigned{species}(0)	Fungi	Ascomycota	Eurotiomycetes	Chaetothyriales	Trichomeriaceae	Knufia	Unassigned
ASV428	0	0	0	0	0	0	0	3	0	0	0	0	0	0	0	0	0	3	Fungi{superkingdom}(100);Basidiomycota{phylum}(100);Agaricomycetes{class}(100);Agaricales{order}(100);Entolomataceae{family}(100);Entoloma{genus}(100);Unassigned{species}(0)	Fungi	Basidiomycota	Agaricomycetes	Agaricales	Entolomataceae	Entoloma	Unassigned
ASV430	0	0	0	0	0	0	0	0	0	0	0	21	0	0	0	0	0	21	Fungi{superkingdom}(100);Unassigned{phylum}(0);Unassigned{class}(0);Unassigned{order}(0);Unassigned{family}(0);Unassigned{genus}(0);Unassigned{species}(0)	Fungi	Unassigned	Unassigned	Unassigned	Unassigned	Unassigned	Unassigned
ASV432	0	0	0	0	0	0	0	0	3	0	0	0	0	0	0	0	0	3	Fungi{superkingdom}(67);Mortierellomycota{phylum}(67);Mortierellomycetes{class}(67);Mortierellales{order}(67);Unassigned{family}(0);Unassigned{genus}(0);Unassigned{species}(0)	Fungi	Mortierellomycota	Mortierellomycetes	Mortierellales	Unassigned	Unassigned	Unassigned
ASV433	0	102	0	0	0	0	0	0	0	0	0	157	0	0	0	0	0	259	Fungi{superkingdom}(100);Ascomycota{phylum}(100);Orbiliomycetes{class}(100);Orbiliales{order}(100);Orbiliaceae{family}(100);Brachyphoris{genus}(100);Brachyphoris_oviparasitica{species}(100)	Fungi	Ascomycota	Orbiliomycetes	Orbiliales	Orbiliaceae	Brachyphoris	Brachyphoris_oviparasitica
ASV434	0	0	0	97	0	0	0	0	409	65	0	0	0	0	0	0	0	571	Fungi{superkingdom}(93);Ascomycota{phylum}(93);Eurotiomycetes{class}(93);Eurotiales{order}(93);Aspergillaceae{family}(93);Aspergillus{genus}(93);Aspergillus_unilateralis{species}(93)	Fungi	Ascomycota	Eurotiomycetes	Eurotiales	Aspergillaceae	Aspergillus	Aspergillus_unilateralis
ASV436	0	0	0	0	0	0	0	0	0	16	0	392	0	0	0	0	0	408	Fungi{superkingdom}(87);Ascomycota{phylum}(87);Sordariomycetes{class}(87);unidentified{order}(87);unidentified{family}(87);unidentified{genus}(87);unidentified{species}(87)	Fungi	Ascomycota	Sordariomycetes	unidentified	unidentified	unidentified	unidentified
ASV437	0	0	3	0	10	0	0	0	0	0	0	0	0	0	0	0	0	13	Fungi{superkingdom}(60);Ascomycota{phylum}(60);Pezizomycetes{class}(60);Pezizales{order}(60);Pyronemataceae{family}(60);Pulvinula{genus}(60);Pulvinula_convexella{species}(60)	Fungi	Ascomycota	Pezizomycetes	Pezizales	Pyronemataceae	Pulvinula	Pulvinula_convexella
ASV438	0	8	0	0	0	0	0	53	0	0	0	0	0	0	15	10	0	86	Fungi{superkingdom}(100);Unassigned{phylum}(0);Unassigned{class}(0);Unassigned{order}(0);Unassigned{family}(0);Unassigned{genus}(0);Unassigned{species}(0)	Fungi	Unassigned	Unassigned	Unassigned	Unassigned	Unassigned	Unassigned
ASV439	0	0	0	0	5	0	0	0	0	0	0	0	0	0	0	0	0	5	Fungi{superkingdom}(88);unidentified{phylum}(88);unidentified{class}(88);unidentified{order}(88);unidentified{family}(88);unidentified{genus}(88);unidentified{species}(88)	Fungi	unidentified	unidentified	unidentified	unidentified	unidentified	unidentified
ASV440	0	0	0	0	0	0	0	0	0	0	0	0	0	0	0	0	7	7	Fungi{superkingdom}(86);Ascomycota{phylum}(86);Pezizomycetes{class}(86);Pezizales{order}(86);Pezizaceae{family}(86);Iodophanus{genus}(86);unidentified{species}(86)	Fungi	Ascomycota	Pezizomycetes	Pezizales	Pezizaceae	Iodophanus	unidentified
ASV441	0	0	0	0	0	0	0	0	0	0	0	0	0	727	22	435	0	1184	Fungi{superkingdom}(100);Unassigned{phylum}(0);Unassigned{class}(0);Unassigned{order}(0);Unassigned{family}(0);Unassigned{genus}(0);Unassigned{species}(0)	Fungi	Unassigned	Unassigned	Unassigned	Unassigned	Unassigned	Unassigned
ASV444	0	0	0	0	157	0	0	0	0	33	0	0	155	0	0	75	0	420	Fungi{superkingdom}(100);Unassigned{phylum}(0);Unassigned{class}(0);Unassigned{order}(0);Unassigned{family}(0);Unassigned{genus}(0);Unassigned{species}(0)	Fungi	Unassigned	Unassigned	Unassigned	Unassigned	Unassigned	Unassigned
ASV445	0	0	0	0	0	0	0	0	0	0	0	0	0	0	0	1160	0	1160	Fungi{superkingdom}(66);unidentified{phylum}(66);unidentified{class}(66);unidentified{order}(66);unidentified{family}(66);unidentified{genus}(66);unidentified{species}(66)	Fungi	unidentified	unidentified	unidentified	unidentified	unidentified	unidentified
ASV446	0	0	5	0	0	0	0	0	0	0	0	0	0	0	0	0	0	5	Fungi{superkingdom}(90);unidentified{phylum}(90);unidentified{class}(90);unidentified{order}(90);unidentified{family}(90);unidentified{genus}(90);unidentified{species}(90)	Fungi	unidentified	unidentified	unidentified	unidentified	unidentified	unidentified
ASV447	0	0	46	0	0	0	0	0	0	0	0	0	0	0	0	0	0	46	Fungi{superkingdom}(98);Ascomycota{phylum}(98);Eurotiomycetes{class}(98);Chaetothyriales{order}(98);unidentified{family}(98);unidentified{genus}(98);unidentified{species}(98)	Fungi	Ascomycota	Eurotiomycetes	Chaetothyriales	unidentified	unidentified	unidentified
ASV449	0	0	0	0	0	0	0	0	0	0	0	59	0	0	0	17	0	76	Fungi{superkingdom}(100);Ascomycota{phylum}(100);Dothideomycetes{class}(100);Pleosporales{order}(100);Phaeosphaeriaceae{family}(100);Setophaeosphaeria{genus}(100);Setophaeosphaeria_sidae{species}(100)	Fungi	Ascomycota	Dothideomycetes	Pleosporales	Phaeosphaeriaceae	Setophaeosphaeria	Setophaeosphaeria_sidae
ASV450	0	0	0	0	0	0	0	0	0	0	0	122	0	0	0	0	0	122	Fungi{superkingdom}(100);Ascomycota{phylum}(100);Dothideomycetes{class}(100);Pleosporales{order}(100);Didymellaceae{family}(100);Unassigned{genus}(0);Unassigned{species}(0)	Fungi	Ascomycota	Dothideomycetes	Pleosporales	Didymellaceae	Unassigned	Unassigned
ASV451	0	0	0	0	0	0	0	147	0	0	0	38	10	429	155	0	6	785	Fungi{superkingdom}(100);Unassigned{phylum}(0);Unassigned{class}(0);Unassigned{order}(0);Unassigned{family}(0);Unassigned{genus}(0);Unassigned{species}(0)	Fungi	Unassigned	Unassigned	Unassigned	Unassigned	Unassigned	Unassigned
ASV452	0	0	0	0	0	0	0	0	215	0	0	0	0	0	0	0	0	215	Fungi{superkingdom}(66);Ascomycota{phylum}(66);Sordariomycetes{class}(66);Unassigned{order}(0);Unassigned{family}(0);Unassigned{genus}(0);Unassigned{species}(0)	Fungi	Ascomycota	Sordariomycetes	Unassigned	Unassigned	Unassigned	Unassigned
ASV454	13	0	0	0	0	0	0	0	0	0	56	0	0	0	0	0	0	69	Fungi{superkingdom}(100);Ascomycota{phylum}(100);Eurotiomycetes{class}(100);Eurotiales{order}(100);Aspergillaceae{family}(100);Aspergillus{genus}(100);Unassigned{species}(0)	Fungi	Ascomycota	Eurotiomycetes	Eurotiales	Aspergillaceae	Aspergillus	Unassigned
ASV456	0	0	0	0	0	0	0	0	0	0	0	0	0	565	0	0	0	565	Fungi{superkingdom}(60);Ascomycota{phylum}(60);Dothideomycetes{class}(60);Pleosporales{order}(60);Sporormiaceae{family}(60);unidentified{genus}(60);unidentified{species}(60)	Fungi	Ascomycota	Dothideomycetes	Pleosporales	Sporormiaceae	unidentified	unidentified
ASV457	28	0	0	0	0	0	0	0	0	0	0	0	0	0	0	0	0	28	Fungi{superkingdom}(92);Ascomycota{phylum}(92);Dothideomycetes{class}(92);Pleosporales{order}(92);Pleosporaceae{family}(92);Comoclathris{genus}(92);unidentified{species}(92)	Fungi	Ascomycota	Dothideomycetes	Pleosporales	Pleosporaceae	Comoclathris	unidentified
ASV458	0	13	0	0	0	0	0	0	0	0	0	0	0	0	0	0	0	13	Fungi{superkingdom}(73);unidentified{phylum}(73);unidentified{class}(73);unidentified{order}(73);unidentified{family}(73);unidentified{genus}(73);unidentified{species}(73)	Fungi	unidentified	unidentified	unidentified	unidentified	unidentified	unidentified
ASV459	0	14	0	0	0	0	0	0	0	0	0	0	0	0	0	0	0	14	Fungi{superkingdom}(60);Chytridiomycota{phylum}(60);Unassigned{class}(0);Unassigned{order}(0);Unassigned{family}(0);Unassigned{genus}(0);Unassigned{species}(0)	Fungi	Chytridiomycota	Unassigned	Unassigned	Unassigned	Unassigned	Unassigned
ASV460	32	81	90	0	75	134	0	0	0	0	0	0	0	0	0	0	0	412	Fungi{superkingdom}(62);unidentified{phylum}(62);unidentified{class}(62);unidentified{order}(62);unidentified{family}(62);unidentified{genus}(62);unidentified{species}(62)	Fungi	unidentified	unidentified	unidentified	unidentified	unidentified	unidentified
ASV461	0	0	0	0	0	0	0	0	0	0	16	533	0	0	0	0	0	549	Fungi{superkingdom}(100);Unassigned{phylum}(0);Unassigned{class}(0);Unassigned{order}(0);Unassigned{family}(0);Unassigned{genus}(0);Unassigned{species}(0)	Fungi	Unassigned	Unassigned	Unassigned	Unassigned	Unassigned	Unassigned
ASV465	0	0	0	0	0	0	0	0	0	114	0	0	0	0	0	0	0	114	Fungi{superkingdom}(71);Ascomycota{phylum}(71);Unassigned{class}(0);Unassigned{order}(0);Unassigned{family}(0);Unassigned{genus}(0);Unassigned{species}(0)	Fungi	Ascomycota	Unassigned	Unassigned	Unassigned	Unassigned	Unassigned
ASV470	0	74	0	0	0	0	0	0	0	0	0	0	0	0	28	0	0	102	Fungi{superkingdom}(100);Ascomycota{phylum}(100);Eurotiomycetes{class}(100);Eurotiales{order}(100);Aspergillaceae{family}(100);Aspergillus{genus}(100);Aspergillus_penicillioides{species}(100)	Fungi	Ascomycota	Eurotiomycetes	Eurotiales	Aspergillaceae	Aspergillus	Aspergillus_penicillioides
ASV471	0	0	0	0	0	0	0	0	0	0	0	0	0	0	638	0	0	638	Fungi{superkingdom}(100);Unassigned{phylum}(0);Unassigned{class}(0);Unassigned{order}(0);Unassigned{family}(0);Unassigned{genus}(0);Unassigned{species}(0)	Fungi	Unassigned	Unassigned	Unassigned	Unassigned	Unassigned	Unassigned
ASV475	0	0	13	4	0	21	0	0	0	0	0	20	0	0	0	0	0	58	Fungi{superkingdom}(72);Ascomycota{phylum}(72);Sordariomycetes{class}(72);Hypocreales{order}(72);Clavicipitaceae{family}(72);Metarhizium{genus}(72);Metarhizium_anisopliae{species}(72)	Fungi	Ascomycota	Sordariomycetes	Hypocreales	Clavicipitaceae	Metarhizium	Metarhizium_anisopliae
ASV479	0	0	0	0	0	0	0	0	0	0	0	0	0	0	0	0	6	6	Fungi{superkingdom}(100);Basidiomycota{phylum}(100);Agaricomycetes{class}(100);Auriculariales{order}(100);Exidiaceae{family}(100);unidentified{genus}(100);unidentified{species}(100)	Fungi	Basidiomycota	Agaricomycetes	Auriculariales	Exidiaceae	unidentified	unidentified
ASV481	0	0	0	0	0	0	0	0	0	0	0	0	0	76	0	136	0	212	Fungi{superkingdom}(98);Ascomycota{phylum}(98);Dothideomycetes{class}(98);Pleosporales{order}(98);Pleosporaceae{family}(98);Alternaria{genus}(98);Alternaria_subcucurbitae{species}(98)	Fungi	Ascomycota	Dothideomycetes	Pleosporales	Pleosporaceae	Alternaria	Alternaria_subcucurbitae
ASV483	0	63	0	0	0	0	0	0	0	0	0	0	0	0	0	0	0	63	Fungi{superkingdom}(100);Ascomycota{phylum}(100);Dothideomycetes{class}(100);Pleosporales{order}(100);Phaeosphaeriaceae{family}(100);Chaetosphaeronema{genus}(100);unidentified{species}(100)	Fungi	Ascomycota	Dothideomycetes	Pleosporales	Phaeosphaeriaceae	Chaetosphaeronema	unidentified
ASV488	141	0	0	0	0	0	0	0	0	0	0	0	0	0	0	0	0	141	Fungi{superkingdom}(100);Mortierellomycota{phylum}(100);Mortierellomycetes{class}(100);Mortierellales{order}(100);Mortierellaceae{family}(100);Mortierella{genus}(100);Unassigned{species}(0)	Fungi	Mortierellomycota	Mortierellomycetes	Mortierellales	Mortierellaceae	Mortierella	Unassigned
ASV489	0	0	0	0	3	0	0	0	0	233	0	0	0	0	0	0	0	236	Fungi{superkingdom}(100);Unassigned{phylum}(0);Unassigned{class}(0);Unassigned{order}(0);Unassigned{family}(0);Unassigned{genus}(0);Unassigned{species}(0)	Fungi	Unassigned	Unassigned	Unassigned	Unassigned	Unassigned	Unassigned
ASV491	0	0	0	0	0	0	0	18	0	32	0	20	0	0	0	0	0	70	Fungi{superkingdom}(76);Ascomycota{phylum}(76);Sordariomycetes{class}(76);Hypocreales{order}(76);unidentified{family}(76);unidentified{genus}(76);unidentified{species}(76)	Fungi	Ascomycota	Sordariomycetes	Hypocreales	unidentified	unidentified	unidentified
ASV497	0	0	0	0	0	0	0	0	0	0	0	60	159	0	0	0	0	219	Fungi{superkingdom}(66);unidentified{phylum}(66);unidentified{class}(66);unidentified{order}(66);unidentified{family}(66);unidentified{genus}(66);unidentified{species}(66)	Fungi	unidentified	unidentified	unidentified	unidentified	unidentified	unidentified
ASV502	0	0	0	0	0	0	0	0	0	0	0	0	0	236	62	15	0	313	Fungi{superkingdom}(93);Ascomycota{phylum}(93);Sordariomycetes{class}(93);Sordariales{order}(93);Lasiosphaeriaceae{family}(93);Schizothecium{genus}(93);Schizothecium_inaequale{species}(93)	Fungi	Ascomycota	Sordariomycetes	Sordariales	Lasiosphaeriaceae	Schizothecium	Schizothecium_inaequale
ASV503	0	0	0	0	0	0	0	0	0	0	0	593	0	0	0	0	0	593	Fungi{superkingdom}(86);Basidiomycota{phylum}(86);Agaricomycetes{class}(86);Agaricales{order}(86);Tricholomataceae{family}(86);Melanoleuca{genus}(86);Melanoleuca_communis{species}(86)	Fungi	Basidiomycota	Agaricomycetes	Agaricales	Tricholomataceae	Melanoleuca	Melanoleuca_communis
ASV504	0	17	0	0	0	0	0	0	0	0	0	0	0	0	0	0	0	17	Fungi{superkingdom}(97);Ascomycota{phylum}(97);Eurotiomycetes{class}(97);Chaetothyriales{order}(97);unidentified{family}(97);unidentified{genus}(97);unidentified{species}(97)	Fungi	Ascomycota	Eurotiomycetes	Chaetothyriales	unidentified	unidentified	unidentified
ASV506	0	0	0	0	0	0	0	0	302	0	0	0	0	9	0	0	0	311	Fungi{superkingdom}(100);Ascomycota{phylum}(100);Sordariomycetes{class}(100);Hypocreales{order}(100);Hypocreales_fam_Incertae_sedis{family}(100);Sarocladium{genus}(100);Sarocladium_kiliense{species}(100)	Fungi	Ascomycota	Sordariomycetes	Hypocreales	Hypocreales_fam_Incertae_sedis	Sarocladium	Sarocladium_kiliense
ASV507	0	222	0	0	4	0	0	0	0	0	0	0	0	0	0	0	0	226	Fungi{superkingdom}(99);Ascomycota{phylum}(99);Eurotiomycetes{class}(99);Chaetothyriales{order}(99);Unassigned{family}(0);Unassigned{genus}(0);Unassigned{species}(0)	Fungi	Ascomycota	Eurotiomycetes	Chaetothyriales	Unassigned	Unassigned	Unassigned
ASV510	28	0	435	0	183	0	0	0	0	0	0	0	0	0	0	0	0	646	Fungi{superkingdom}(87);Ascomycota{phylum}(87);Dothideomycetes{class}(87);Pleosporales{order}(87);Pleosporales_fam_Incertae_sedis{family}(87);Thyrostroma{genus}(87);Thyrostroma_cornicola{species}(87)	Fungi	Ascomycota	Dothideomycetes	Pleosporales	Pleosporales_fam_Incertae_sedis	Thyrostroma	Thyrostroma_cornicola
ASV511	0	16	18	0	8	0	0	0	0	0	0	0	0	0	0	0	0	42	Fungi{superkingdom}(100);Ascomycota{phylum}(100);Eurotiomycetes{class}(100);Chaetothyriales{order}(100);Trichomeriaceae{family}(100);Knufia{genus}(100);Knufia_aspidiotus{species}(100)	Fungi	Ascomycota	Eurotiomycetes	Chaetothyriales	Trichomeriaceae	Knufia	Knufia_aspidiotus
ASV512	0	0	0	0	0	0	0	0	0	873	0	0	0	0	0	0	0	873	Fungi{superkingdom}(73);unidentified{phylum}(73);unidentified{class}(73);unidentified{order}(73);unidentified{family}(73);unidentified{genus}(73);unidentified{species}(73)	Fungi	unidentified	unidentified	unidentified	unidentified	unidentified	unidentified
ASV513	0	0	0	0	0	0	0	0	0	0	0	0	0	0	347	0	4	351	Fungi{superkingdom}(99);Ascomycota{phylum}(99);Sordariomycetes{class}(99);Sordariales{order}(99);Chaetomiaceae{family}(99);Chaetomium{genus}(99);Chaetomium_elatum{species}(99)	Fungi	Ascomycota	Sordariomycetes	Sordariales	Chaetomiaceae	Chaetomium	Chaetomium_elatum
ASV514	0	0	0	0	0	0	0	0	0	0	0	159	0	0	0	0	0	159	Fungi{superkingdom}(100);Unassigned{phylum}(0);Unassigned{class}(0);Unassigned{order}(0);Unassigned{family}(0);Unassigned{genus}(0);Unassigned{species}(0)	Fungi	Unassigned	Unassigned	Unassigned	Unassigned	Unassigned	Unassigned
ASV515	0	0	0	0	0	0	0	0	0	0	837	0	0	0	0	0	0	837	Fungi{superkingdom}(100);Ascomycota{phylum}(100);Sordariomycetes{class}(100);Branch06{order}(100);unidentified{family}(100);unidentified{genus}(100);unidentified{species}(100)	Fungi	Ascomycota	Sordariomycetes	Branch06	unidentified	unidentified	unidentified
ASV517	0	69	0	0	0	0	0	0	0	0	0	0	0	0	0	0	0	69	Fungi{superkingdom}(100);Unassigned{phylum}(0);Unassigned{class}(0);Unassigned{order}(0);Unassigned{family}(0);Unassigned{genus}(0);Unassigned{species}(0)	Fungi	Unassigned	Unassigned	Unassigned	Unassigned	Unassigned	Unassigned
ASV519	10	0	0	0	0	0	114	0	0	0	0	0	0	0	0	0	0	124	Fungi{superkingdom}(76);Basidiomycota{phylum}(76);Agaricomycetes{class}(76);unidentified{order}(76);unidentified{family}(76);unidentified{genus}(76);unidentified{species}(76)	Fungi	Basidiomycota	Agaricomycetes	unidentified	unidentified	unidentified	unidentified
ASV525	0	0	0	0	5	0	0	0	0	0	0	0	0	0	0	24	0	29	Fungi{superkingdom}(100);Ascomycota{phylum}(100);Pezizomycetes{class}(100);Pezizales{order}(100);Pezizales_fam_Incertae_sedis{family}(100);Trichobolus{genus}(100);Trichobolus_zukalii{species}(100)	Fungi	Ascomycota	Pezizomycetes	Pezizales	Pezizales_fam_Incertae_sedis	Trichobolus	Trichobolus_zukalii
ASV530	0	7	0	0	0	0	291	0	0	0	35	0	0	0	0	0	0	333	Fungi{superkingdom}(100);Unassigned{phylum}(0);Unassigned{class}(0);Unassigned{order}(0);Unassigned{family}(0);Unassigned{genus}(0);Unassigned{species}(0)	Fungi	Unassigned	Unassigned	Unassigned	Unassigned	Unassigned	Unassigned
ASV532	15	0	0	0	6	0	0	0	0	0	0	0	0	0	0	0	0	21	Fungi{superkingdom}(92);Basidiomycota{phylum}(92);Tremellomycetes{class}(92);Tremellales{order}(92);Bulleraceae{family}(92);Genolevuria{genus}(92);Genolevuria_armeniaca{species}(92)	Fungi	Basidiomycota	Tremellomycetes	Tremellales	Bulleraceae	Genolevuria	Genolevuria_armeniaca
ASV534	0	0	0	0	0	0	0	11	44	0	0	0	0	0	0	0	0	55	Fungi{superkingdom}(71);Glomeromycota{phylum}(71);Glomeromycetes{class}(71);Glomerales{order}(71);Glomeraceae{family}(71);Glomus{genus}(71);Glomus_cubense{species}(71)	Fungi	Glomeromycota	Glomeromycetes	Glomerales	Glomeraceae	Glomus	Glomus_cubense
ASV537	42	0	425	0	170	0	0	0	0	0	0	0	0	0	0	0	0	637	Fungi{superkingdom}(91);unidentified{phylum}(91);unidentified{class}(91);unidentified{order}(91);unidentified{family}(91);unidentified{genus}(91);unidentified{species}(91)	Fungi	unidentified	unidentified	unidentified	unidentified	unidentified	unidentified
ASV538	0	686	66	22	0	0	0	0	0	0	0	0	0	0	0	0	0	774	Fungi{superkingdom}(100);Mortierellomycota{phylum}(100);Mortierellomycetes{class}(100);Mortierellales{order}(100);Mortierellaceae{family}(100);Mortierella{genus}(100);Mortierella_wolfii{species}(100)	Fungi	Mortierellomycota	Mortierellomycetes	Mortierellales	Mortierellaceae	Mortierella	Mortierella_wolfii
ASV539	0	0	0	2	0	0	0	0	0	47	0	0	0	0	0	0	0	49	Fungi{superkingdom}(76);unidentified{phylum}(76);unidentified{class}(76);unidentified{order}(76);unidentified{family}(76);unidentified{genus}(76);unidentified{species}(76)	Fungi	unidentified	unidentified	unidentified	unidentified	unidentified	unidentified
ASV542	0	0	0	0	0	0	0	0	0	0	0	0	0	0	0	55	7	62	Fungi{superkingdom}(95);Glomeromycota{phylum}(95);Glomeromycetes{class}(95);Glomerales{order}(95);Glomeraceae{family}(95);Glomus{genus}(95);unidentified{species}(95)	Fungi	Glomeromycota	Glomeromycetes	Glomerales	Glomeraceae	Glomus	unidentified
ASV543	0	0	0	0	0	0	0	63	0	0	0	74	0	409	0	0	0	546	Fungi{superkingdom}(76);Ascomycota{phylum}(76);Dothideomycetes{class}(76);Pleosporales{order}(76);Lophiostomataceae{family}(76);Lophiostoma{genus}(76);Lophiostoma_rosae{species}(76)	Fungi	Ascomycota	Dothideomycetes	Pleosporales	Lophiostomataceae	Lophiostoma	Lophiostoma_rosae
ASV544	0	151	0	0	0	0	0	0	0	0	0	0	0	0	0	0	0	151	Fungi{superkingdom}(97);Ascomycota{phylum}(97);Sordariomycetes{class}(97);Sordariales{order}(97);Chaetomiaceae{family}(97);Acrophialophora{genus}(97);unidentified{species}(97)	Fungi	Ascomycota	Sordariomycetes	Sordariales	Chaetomiaceae	Acrophialophora	unidentified
ASV548	9	296	0	0	0	0	0	0	0	0	0	0	0	0	0	0	0	305	Fungi{superkingdom}(100);Ascomycota{phylum}(100);Leotiomycetes{class}(100);Helotiales{order}(100);Helotiaceae{family}(100);Tetracladium{genus}(100);Tetracladium_furcatum{species}(100)	Fungi	Ascomycota	Leotiomycetes	Helotiales	Helotiaceae	Tetracladium	Tetracladium_furcatum
ASV549	9	0	0	0	25	16	0	0	0	0	0	0	21	0	60	15	0	146	Fungi{superkingdom}(100);Unassigned{phylum}(0);Unassigned{class}(0);Unassigned{order}(0);Unassigned{family}(0);Unassigned{genus}(0);Unassigned{species}(0)	Fungi	Unassigned	Unassigned	Unassigned	Unassigned	Unassigned	Unassigned
ASV557	0	0	0	0	0	0	0	0	0	0	0	0	727	0	0	0	0	727	Fungi{superkingdom}(61);Basidiomycota{phylum}(61);Agaricomycetes{class}(61);unidentified{order}(61);unidentified{family}(61);unidentified{genus}(61);unidentified{species}(61)	Fungi	Basidiomycota	Agaricomycetes	unidentified	unidentified	unidentified	unidentified
ASV558	0	703	0	0	21	0	0	0	0	0	0	0	0	2	0	0	0	726	Fungi{superkingdom}(86);unidentified{phylum}(86);unidentified{class}(86);unidentified{order}(86);unidentified{family}(86);unidentified{genus}(86);unidentified{species}(86)	Fungi	unidentified	unidentified	unidentified	unidentified	unidentified	unidentified
ASV560	0	20	0	0	0	0	0	0	0	0	0	0	0	0	0	0	0	20	Fungi{superkingdom}(90);Ascomycota{phylum}(90);Eurotiomycetes{class}(90);Chaetothyriales{order}(90);Trichomeriaceae{family}(90);Arthrocladium{genus}(90);Unassigned{species}(0)	Fungi	Ascomycota	Eurotiomycetes	Chaetothyriales	Trichomeriaceae	Arthrocladium	Unassigned
ASV561	0	82	63	19	0	0	0	0	0	0	0	0	0	0	0	0	0	164	Fungi{superkingdom}(99);Ascomycota{phylum}(99);Dothideomycetes{class}(99);Pleosporales{order}(99);Phaeosphaeriaceae{family}(99);Paraphoma{genus}(99);Paraphoma_chrysanthemicola{species}(99)	Fungi	Ascomycota	Dothideomycetes	Pleosporales	Phaeosphaeriaceae	Paraphoma	Paraphoma_chrysanthemicola
ASV563	8	0	0	0	0	0	0	0	306	0	0	0	0	0	0	0	0	314	Fungi{superkingdom}(100);Unassigned{phylum}(0);Unassigned{class}(0);Unassigned{order}(0);Unassigned{family}(0);Unassigned{genus}(0);Unassigned{species}(0)	Fungi	Unassigned	Unassigned	Unassigned	Unassigned	Unassigned	Unassigned
ASV566	0	699	0	0	0	0	0	0	0	0	0	0	0	0	0	0	0	699	Fungi{superkingdom}(100);Unassigned{phylum}(0);Unassigned{class}(0);Unassigned{order}(0);Unassigned{family}(0);Unassigned{genus}(0);Unassigned{species}(0)	Fungi	Unassigned	Unassigned	Unassigned	Unassigned	Unassigned	Unassigned
ASV570	0	0	0	0	0	0	0	0	0	0	0	439	0	0	0	0	0	439	Fungi{superkingdom}(100);Unassigned{phylum}(0);Unassigned{class}(0);Unassigned{order}(0);Unassigned{family}(0);Unassigned{genus}(0);Unassigned{species}(0)	Fungi	Unassigned	Unassigned	Unassigned	Unassigned	Unassigned	Unassigned
ASV573	0	0	0	0	0	0	0	0	0	0	0	0	11	0	0	0	0	11	Fungi{superkingdom}(96);Ascomycota{phylum}(96);Sordariomycetes{class}(96);Sordariales{order}(96);Chaetomiaceae{family}(96);Botryotrichum{genus}(96);Botryotrichum_atrogriseum{species}(96)	Fungi	Ascomycota	Sordariomycetes	Sordariales	Chaetomiaceae	Botryotrichum	Botryotrichum_atrogriseum
ASV576	13	8	0	0	0	0	0	0	0	0	0	0	0	0	0	0	0	21	Fungi{superkingdom}(91);Ascomycota{phylum}(91);Dothideomycetes{class}(91);Pleosporales{order}(91);Unassigned{family}(0);Unassigned{genus}(0);Unassigned{species}(0)	Fungi	Ascomycota	Dothideomycetes	Pleosporales	Unassigned	Unassigned	Unassigned
ASV577	0	0	0	0	0	0	0	0	0	0	0	73	0	31	0	0	0	104	Fungi{superkingdom}(99);Ascomycota{phylum}(99);Sordariomycetes{class}(99);Hypocreales{order}(99);Hypocreales_fam_Incertae_sedis{family}(99);Acremonium{genus}(99);Acremonium_alternatum{species}(99)	Fungi	Ascomycota	Sordariomycetes	Hypocreales	Hypocreales_fam_Incertae_sedis	Acremonium	Acremonium_alternatum
ASV578	0	0	0	0	0	0	0	0	0	0	0	7	0	0	0	0	0	7	Fungi{superkingdom}(98);Basidiomycota{phylum}(98);Tremellomycetes{class}(98);Filobasidiales{order}(98);Filobasidiaceae{family}(98);Filobasidium{genus}(98);Filobasidium_chernovii{species}(98)	Fungi	Basidiomycota	Tremellomycetes	Filobasidiales	Filobasidiaceae	Filobasidium	Filobasidium_chernovii
ASV580	18	0	0	0	0	0	0	0	0	0	0	26	0	0	132	0	0	176	Fungi{superkingdom}(95);Ascomycota{phylum}(95);Dothideomycetes{class}(95);Pleosporales{order}(95);Unassigned{family}(0);Unassigned{genus}(0);Unassigned{species}(0)	Fungi	Ascomycota	Dothideomycetes	Pleosporales	Unassigned	Unassigned	Unassigned
ASV587	0	0	0	0	0	0	0	0	2	0	0	0	0	0	0	0	0	2	Fungi{superkingdom}(75);Basidiomycota{phylum}(75);Agaricomycetes{class}(75);Cantharellales{order}(75);Ceratobasidiaceae{family}(75);unidentified{genus}(75);unidentified{species}(75)	Fungi	Basidiomycota	Agaricomycetes	Cantharellales	Ceratobasidiaceae	unidentified	unidentified
ASV595	0	669	0	0	0	0	0	0	0	0	0	0	0	0	0	0	0	669	Fungi{superkingdom}(98);Basidiomycota{phylum}(98);Agaricomycetes{class}(98);Unassigned{order}(0);Unassigned{family}(0);Unassigned{genus}(0);Unassigned{species}(0)	Fungi	Basidiomycota	Agaricomycetes	Unassigned	Unassigned	Unassigned	Unassigned
ASV596	0	31	0	0	0	0	0	0	0	0	0	0	0	0	0	0	0	31	Fungi{superkingdom}(100);Ascomycota{phylum}(100);Eurotiomycetes{class}(100);Chaetothyriales{order}(100);Trichomeriaceae{family}(100);Knufia{genus}(100);Knufia_tsunedae{species}(100)	Fungi	Ascomycota	Eurotiomycetes	Chaetothyriales	Trichomeriaceae	Knufia	Knufia_tsunedae
ASV597	0	0	0	0	0	0	0	0	0	0	0	0	0	109	0	0	0	109	Fungi{superkingdom}(91);Ascomycota{phylum}(91);Sordariomycetes{class}(91);Sordariales{order}(91);Chaetomiaceae{family}(91);Chaetomium{genus}(91);Chaetomium_elatum{species}(91)	Fungi	Ascomycota	Sordariomycetes	Sordariales	Chaetomiaceae	Chaetomium	Chaetomium_elatum
ASV598	0	0	19	0	0	0	0	0	0	0	0	0	0	0	0	0	0	19	Fungi{superkingdom}(100);Unassigned{phylum}(0);Unassigned{class}(0);Unassigned{order}(0);Unassigned{family}(0);Unassigned{genus}(0);Unassigned{species}(0)	Fungi	Unassigned	Unassigned	Unassigned	Unassigned	Unassigned	Unassigned
ASV600	0	20	0	7	11	0	0	0	0	40	0	0	0	0	0	0	0	78	Fungi{superkingdom}(98);Ascomycota{phylum}(98);Eurotiomycetes{class}(98);Chaetothyriales{order}(98);Trichomeriaceae{family}(98);Knufia{genus}(98);unidentified{species}(98)	Fungi	Ascomycota	Eurotiomycetes	Chaetothyriales	Trichomeriaceae	Knufia	unidentified
ASV601	0	0	0	11	0	0	0	0	0	0	0	0	0	0	0	0	0	11	Fungi{superkingdom}(89);Basidiomycota{phylum}(89);Unassigned{class}(0);Unassigned{order}(0);Unassigned{family}(0);Unassigned{genus}(0);Unassigned{species}(0)	Fungi	Basidiomycota	Unassigned	Unassigned	Unassigned	Unassigned	Unassigned
ASV603	0	0	0	198	0	0	0	0	0	0	0	0	0	0	0	0	0	198	Fungi{superkingdom}(84);Ascomycota{phylum}(84);Dothideomycetes{class}(84);Dothideales{order}(84);Dothideaceae{family}(84);Dothidea{genus}(84);Dothidea_berberidis{species}(84)	Fungi	Ascomycota	Dothideomycetes	Dothideales	Dothideaceae	Dothidea	Dothidea_berberidis
ASV607	31	7	0	0	0	0	0	0	0	0	0	0	0	0	0	0	0	38	Fungi{superkingdom}(61);Basidiomycota{phylum}(61);Agaricomycetes{class}(61);Agaricales{order}(61);Agaricaceae{family}(61);Agaricus{genus}(61);unidentified{species}(61)	Fungi	Basidiomycota	Agaricomycetes	Agaricales	Agaricaceae	Agaricus	unidentified
ASV608	0	0	0	0	0	0	0	0	0	0	0	55	0	0	0	0	0	55	Fungi{superkingdom}(68);unidentified{phylum}(68);unidentified{class}(68);unidentified{order}(68);unidentified{family}(68);unidentified{genus}(68);unidentified{species}(68)	Fungi	unidentified	unidentified	unidentified	unidentified	unidentified	unidentified
ASV609	0	0	0	0	0	0	0	0	0	0	0	0	0	0	0	58	0	58	Fungi{superkingdom}(72);unidentified{phylum}(72);unidentified{class}(72);unidentified{order}(72);unidentified{family}(72);unidentified{genus}(72);unidentified{species}(72)	Fungi	unidentified	unidentified	unidentified	unidentified	unidentified	unidentified
ASV610	0	0	63	0	0	0	0	0	0	0	0	0	0	0	99	0	287	449	Fungi{superkingdom}(74);unidentified{phylum}(74);unidentified{class}(74);unidentified{order}(74);unidentified{family}(74);unidentified{genus}(74);unidentified{species}(74)	Fungi	unidentified	unidentified	unidentified	unidentified	unidentified	unidentified
ASV614	0	26	0	0	0	0	0	0	0	0	0	0	0	0	0	0	0	26	Fungi{superkingdom}(100);Unassigned{phylum}(0);Unassigned{class}(0);Unassigned{order}(0);Unassigned{family}(0);Unassigned{genus}(0);Unassigned{species}(0)	Fungi	Unassigned	Unassigned	Unassigned	Unassigned	Unassigned	Unassigned
ASV615	0	0	0	0	0	0	0	0	0	0	0	377	0	0	0	0	0	377	Fungi{superkingdom}(65);Ascomycota{phylum}(65);Dothideomycetes{class}(65);Unassigned{order}(0);Unassigned{family}(0);Unassigned{genus}(0);Unassigned{species}(0)	Fungi	Ascomycota	Dothideomycetes	Unassigned	Unassigned	Unassigned	Unassigned
ASV627	15	0	14	17	0	0	0	0	0	0	0	0	0	19	0	0	0	65	Fungi{superkingdom}(68);Ascomycota{phylum}(68);Unassigned{class}(0);Unassigned{order}(0);Unassigned{family}(0);Unassigned{genus}(0);Unassigned{species}(0)	Fungi	Ascomycota	Unassigned	Unassigned	Unassigned	Unassigned	Unassigned
ASV628	37	0	0	86	0	0	0	0	0	0	0	0	0	0	0	0	0	123	Fungi{superkingdom}(89);unidentified{phylum}(89);unidentified{class}(89);unidentified{order}(89);unidentified{family}(89);unidentified{genus}(89);unidentified{species}(89)	Fungi	unidentified	unidentified	unidentified	unidentified	unidentified	unidentified
ASV629	0	0	0	0	0	0	0	0	0	0	0	0	0	0	153	248	0	401	Fungi{superkingdom}(71);Ascomycota{phylum}(71);Sordariomycetes{class}(71);Hypocreales{order}(71);Bionectriaceae{family}(71);Hydropisphaera{genus}(71);unidentified{species}(71)	Fungi	Ascomycota	Sordariomycetes	Hypocreales	Bionectriaceae	Hydropisphaera	unidentified
ASV630	3	0	0	0	14	11	0	75	43	91	0	0	0	0	0	0	0	237	Fungi{superkingdom}(96);unidentified{phylum}(96);unidentified{class}(96);unidentified{order}(96);unidentified{family}(96);unidentified{genus}(96);unidentified{species}(96)	Fungi	unidentified	unidentified	unidentified	unidentified	unidentified	unidentified
ASV637	0	0	0	15	10	0	0	0	0	0	0	0	0	0	0	0	0	25	Fungi{superkingdom}(100);Ascomycota{phylum}(100);Dothideomycetes{class}(100);Pleosporales{order}(100);Phaeosphaeriaceae{family}(100);Neosetophoma{genus}(100);Neosetophoma_samararum{species}(100)	Fungi	Ascomycota	Dothideomycetes	Pleosporales	Phaeosphaeriaceae	Neosetophoma	Neosetophoma_samararum
ASV638	0	0	0	0	4	0	0	0	0	0	0	0	0	18	0	0	0	22	Fungi{superkingdom}(70);Ascomycota{phylum}(70);Dothideomycetes{class}(70);Pleosporales{order}(70);Sporormiaceae{family}(70);Unassigned{genus}(0);Unassigned{species}(0)	Fungi	Ascomycota	Dothideomycetes	Pleosporales	Sporormiaceae	Unassigned	Unassigned
ASV641	0	0	0	0	0	0	0	0	0	93	0	0	0	0	0	0	0	93	Fungi{superkingdom}(81);Ascomycota{phylum}(81);Unassigned{class}(0);Unassigned{order}(0);Unassigned{family}(0);Unassigned{genus}(0);Unassigned{species}(0)	Fungi	Ascomycota	Unassigned	Unassigned	Unassigned	Unassigned	Unassigned
ASV645	0	15	0	20	0	0	0	0	0	0	0	0	0	0	0	0	0	35	Fungi{superkingdom}(100);Basidiomycota{phylum}(100);Cystobasidiomycetes{class}(100);Erythrobasidiales{order}(100);Erythrobasidiaceae{family}(100);Erythrobasidium{genus}(100);Unassigned{species}(0)	Fungi	Basidiomycota	Cystobasidiomycetes	Erythrobasidiales	Erythrobasidiaceae	Erythrobasidium	Unassigned
ASV647	0	0	0	0	0	0	0	0	0	0	0	0	0	0	166	106	0	272	Fungi{superkingdom}(67);Basidiomycota{phylum}(67);Tremellomycetes{class}(67);Filobasidiales{order}(67);Filobasidiaceae{family}(67);Naganishia{genus}(67);Naganishia_uzbekistanensis{species}(67)	Fungi	Basidiomycota	Tremellomycetes	Filobasidiales	Filobasidiaceae	Naganishia	Naganishia_uzbekistanensis
ASV649	0	8	0	0	11	0	0	0	0	0	0	0	0	0	0	0	0	19	Fungi{superkingdom}(100);Unassigned{phylum}(0);Unassigned{class}(0);Unassigned{order}(0);Unassigned{family}(0);Unassigned{genus}(0);Unassigned{species}(0)	Fungi	Unassigned	Unassigned	Unassigned	Unassigned	Unassigned	Unassigned
ASV650	0	0	0	0	0	0	0	0	0	0	0	0	0	0	0	0	2	2	Fungi{superkingdom}(86);Basidiomycota{phylum}(86);Agaricomycetes{class}(86);Sebacinales{order}(86);unidentified{family}(86);unidentified{genus}(86);unidentified{species}(86)	Fungi	Basidiomycota	Agaricomycetes	Sebacinales	unidentified	unidentified	unidentified
ASV657	0	0	0	0	0	0	0	0	0	272	0	0	0	0	0	0	0	272	Fungi{superkingdom}(73);unidentified{phylum}(73);unidentified{class}(73);unidentified{order}(73);unidentified{family}(73);unidentified{genus}(73);unidentified{species}(73)	Fungi	unidentified	unidentified	unidentified	unidentified	unidentified	unidentified
ASV659	0	0	0	0	0	0	0	0	0	0	0	0	0	0	46	0	0	46	Fungi{superkingdom}(100);Unassigned{phylum}(0);Unassigned{class}(0);Unassigned{order}(0);Unassigned{family}(0);Unassigned{genus}(0);Unassigned{species}(0)	Fungi	Unassigned	Unassigned	Unassigned	Unassigned	Unassigned	Unassigned
ASV660	25	0	0	0	0	0	0	0	0	0	0	0	0	0	0	0	0	25	Fungi{superkingdom}(71);unidentified{phylum}(71);unidentified{class}(71);unidentified{order}(71);unidentified{family}(71);unidentified{genus}(71);unidentified{species}(71)	Fungi	unidentified	unidentified	unidentified	unidentified	unidentified	unidentified
ASV665	6	0	0	0	0	0	0	0	0	0	0	0	0	0	0	0	0	6	Fungi{superkingdom}(62);Basidiomycota{phylum}(62);Agaricomycetes{class}(62);unidentified{order}(62);unidentified{family}(62);unidentified{genus}(62);unidentified{species}(62)	Fungi	Basidiomycota	Agaricomycetes	unidentified	unidentified	unidentified	unidentified
ASV666	0	20	0	0	0	0	0	0	0	0	0	0	0	0	0	0	0	20	Fungi{superkingdom}(93);Ascomycota{phylum}(93);Eurotiomycetes{class}(93);Chaetothyriales{order}(93);Herpotrichiellaceae{family}(93);Veronaea{genus}(93);Unassigned{species}(0)	Fungi	Ascomycota	Eurotiomycetes	Chaetothyriales	Herpotrichiellaceae	Veronaea	Unassigned
ASV670	0	0	0	3	0	0	0	0	0	0	0	0	0	0	0	0	0	3	Fungi{superkingdom}(100);Ascomycota{phylum}(100);Sordariomycetes{class}(100);Microascales{order}(100);Microascaceae{family}(100);Cephalotrichum{genus}(100);Unassigned{species}(0)	Fungi	Ascomycota	Sordariomycetes	Microascales	Microascaceae	Cephalotrichum	Unassigned
ASV675	0	6	0	0	0	10	0	0	0	0	0	0	0	0	0	0	0	16	Fungi{superkingdom}(65);Ascomycota{phylum}(65);Dothideomycetes{class}(65);Capnodiales{order}(65);Cladosporiaceae{family}(65);Rachicladosporium{genus}(65);Rachicladosporium_paucitum{species}(65)	Fungi	Ascomycota	Dothideomycetes	Capnodiales	Cladosporiaceae	Rachicladosporium	Rachicladosporium_paucitum
ASV677	0	0	0	0	0	0	0	0	0	0	0	399	0	0	0	0	0	399	Fungi{superkingdom}(96);Ascomycota{phylum}(96);Dothideomycetes{class}(96);Pleosporales{order}(96);Didymellaceae{family}(96);Didymella{genus}(96);Didymella_urticicola{species}(96)	Fungi	Ascomycota	Dothideomycetes	Pleosporales	Didymellaceae	Didymella	Didymella_urticicola
ASV678	0	0	0	0	0	20	0	0	0	0	0	0	0	0	0	0	0	20	Fungi{superkingdom}(83);Ascomycota{phylum}(83);Dothideomycetes{class}(83);Pleosporales{order}(83);Pleosporales_fam_Incertae_sedis{family}(83);Thyrostroma{genus}(83);unidentified{species}(83)	Fungi	Ascomycota	Dothideomycetes	Pleosporales	Pleosporales_fam_Incertae_sedis	Thyrostroma	unidentified
ASV682	0	235	0	0	0	0	0	0	0	0	0	0	0	0	0	0	0	235	Fungi{superkingdom}(71);Ascomycota{phylum}(71);Sordariomycetes{class}(71);Sordariales{order}(71);Unassigned{family}(0);Unassigned{genus}(0);Unassigned{species}(0)	Fungi	Ascomycota	Sordariomycetes	Sordariales	Unassigned	Unassigned	Unassigned
ASV683	0	0	0	0	0	3	0	0	0	0	0	0	0	0	0	0	0	3	Fungi{superkingdom}(75);Basidiomycota{phylum}(75);Agaricomycetes{class}(75);unidentified{order}(75);unidentified{family}(75);unidentified{genus}(75);unidentified{species}(75)	Fungi	Basidiomycota	Agaricomycetes	unidentified	unidentified	unidentified	unidentified
ASV687	30	0	0	0	0	0	0	0	0	0	0	0	0	0	0	0	0	30	Fungi{superkingdom}(77);Basidiomycota{phylum}(77);Agaricomycetes{class}(77);unidentified{order}(77);unidentified{family}(77);unidentified{genus}(77);unidentified{species}(77)	Fungi	Basidiomycota	Agaricomycetes	unidentified	unidentified	unidentified	unidentified
ASV688	0	0	0	0	0	0	0	0	0	0	0	9	0	0	0	0	0	9	Fungi{superkingdom}(73);Ascomycota{phylum}(73);unidentified{class}(73);unidentified{order}(73);unidentified{family}(73);unidentified{genus}(73);unidentified{species}(73)	Fungi	Ascomycota	unidentified	unidentified	unidentified	unidentified	unidentified
ASV692	0	0	0	0	0	0	0	0	0	62	0	0	0	0	0	0	0	62	Fungi{superkingdom}(100);Ascomycota{phylum}(100);Dothideomycetes{class}(100);Pleosporales{order}(100);Coniothyriaceae{family}(100);Coniothyrium{genus}(100);unidentified{species}(100)	Fungi	Ascomycota	Dothideomycetes	Pleosporales	Coniothyriaceae	Coniothyrium	unidentified
ASV694	29	0	0	3	0	0	0	0	0	71	0	0	0	0	0	0	0	103	Fungi{superkingdom}(93);unidentified{phylum}(93);unidentified{class}(93);unidentified{order}(93);unidentified{family}(93);unidentified{genus}(93);unidentified{species}(93)	Fungi	unidentified	unidentified	unidentified	unidentified	unidentified	unidentified
ASV695	0	0	9	0	0	0	0	0	0	0	0	0	0	0	0	0	0	9	Fungi{superkingdom}(87);Ascomycota{phylum}(87);Sordariomycetes{class}(87);Sordariales{order}(87);Lasiosphaeriaceae{family}(87);Cladorrhinum{genus}(87);Unassigned{species}(0)	Fungi	Ascomycota	Sordariomycetes	Sordariales	Lasiosphaeriaceae	Cladorrhinum	Unassigned
ASV698	0	0	0	0	0	0	0	22	0	0	0	0	0	0	0	0	0	22	Fungi{superkingdom}(61);unidentified{phylum}(61);unidentified{class}(61);unidentified{order}(61);unidentified{family}(61);unidentified{genus}(61);unidentified{species}(61)	Fungi	unidentified	unidentified	unidentified	unidentified	unidentified	unidentified
ASV699	0	3	0	0	0	0	0	0	0	0	0	0	0	24	45	0	0	72	Fungi{superkingdom}(99);unidentified{phylum}(99);unidentified{class}(99);unidentified{order}(99);unidentified{family}(99);unidentified{genus}(99);unidentified{species}(99)	Fungi	unidentified	unidentified	unidentified	unidentified	unidentified	unidentified
ASV700	0	0	0	0	0	0	0	0	0	0	3	14	0	0	0	0	0	17	Fungi{superkingdom}(100);Ascomycota{phylum}(100);Sordariomycetes{class}(100);Hypocreales{order}(100);Ophiocordycipitaceae{family}(100);Purpureocillium{genus}(100);Purpureocillium_lilacinum{species}(100)	Fungi	Ascomycota	Sordariomycetes	Hypocreales	Ophiocordycipitaceae	Purpureocillium	Purpureocillium_lilacinum
ASV701	0	14	0	0	0	0	0	0	0	0	0	0	0	0	0	0	0	14	Fungi{superkingdom}(74);Ascomycota{phylum}(74);Unassigned{class}(0);Unassigned{order}(0);Unassigned{family}(0);Unassigned{genus}(0);Unassigned{species}(0)	Fungi	Ascomycota	Unassigned	Unassigned	Unassigned	Unassigned	Unassigned
ASV703	0	74	0	0	0	0	0	0	0	0	0	0	0	0	0	0	0	74	Fungi{superkingdom}(82);unidentified{phylum}(82);unidentified{class}(82);unidentified{order}(82);unidentified{family}(82);unidentified{genus}(82);unidentified{species}(82)	Fungi	unidentified	unidentified	unidentified	unidentified	unidentified	unidentified
ASV704	0	26	0	0	0	0	0	0	0	0	0	0	0	0	0	0	0	26	Fungi{superkingdom}(61);Ascomycota{phylum}(61);unidentified{class}(61);unidentified{order}(61);unidentified{family}(61);unidentified{genus}(61);unidentified{species}(61)	Fungi	Ascomycota	unidentified	unidentified	unidentified	unidentified	unidentified
ASV705	0	0	0	0	0	27	0	0	0	0	0	0	0	0	0	0	0	27	Fungi{superkingdom}(74);unidentified{phylum}(74);unidentified{class}(74);unidentified{order}(74);unidentified{family}(74);unidentified{genus}(74);unidentified{species}(74)	Fungi	unidentified	unidentified	unidentified	unidentified	unidentified	unidentified
ASV706	0	0	0	0	0	0	460	0	0	0	0	0	0	0	0	0	0	460	Fungi{superkingdom}(74);Ascomycota{phylum}(74);Sordariomycetes{class}(74);Xylariales{order}(74);Xylariales_fam_Incertae_sedis{family}(74);Phialemoniopsis{genus}(74);Phialemoniopsis_pluriloculosa{species}(74)	Fungi	Ascomycota	Sordariomycetes	Xylariales	Xylariales_fam_Incertae_sedis	Phialemoniopsis	Phialemoniopsis_pluriloculosa
ASV710	0	0	0	0	9	0	0	0	0	0	0	0	0	0	0	0	0	9	Fungi{superkingdom}(98);Ascomycota{phylum}(98);Dothideomycetes{class}(98);Pleosporales{order}(98);Didymosphaeriaceae{family}(98);Paraconiothyrium{genus}(98);unidentified{species}(98)	Fungi	Ascomycota	Dothideomycetes	Pleosporales	Didymosphaeriaceae	Paraconiothyrium	unidentified
ASV713	0	0	0	0	0	0	0	0	0	0	0	0	0	0	37	0	0	37	Fungi{superkingdom}(87);Basidiomycota{phylum}(87);Tremellomycetes{class}(87);Filobasidiales{order}(87);Filobasidiaceae{family}(87);Naganishia{genus}(87);Naganishia_adeliensis{species}(87)	Fungi	Basidiomycota	Tremellomycetes	Filobasidiales	Filobasidiaceae	Naganishia	Naganishia_adeliensis
ASV715	0	0	0	17	0	0	0	0	0	0	0	0	0	0	57	0	0	74	Fungi{superkingdom}(100);Ascomycota{phylum}(100);Sordariomycetes{class}(100);Hypocreales{order}(100);Hypocreales_fam_Incertae_sedis{family}(100);Acremonium{genus}(100);Acremonium_fusidioides{species}(100)	Fungi	Ascomycota	Sordariomycetes	Hypocreales	Hypocreales_fam_Incertae_sedis	Acremonium	Acremonium_fusidioides
ASV717	0	0	0	0	0	0	0	0	0	0	0	0	0	0	0	0	462	462	Fungi{superkingdom}(78);unidentified{phylum}(78);unidentified{class}(78);unidentified{order}(78);unidentified{family}(78);unidentified{genus}(78);unidentified{species}(78)	Fungi	unidentified	unidentified	unidentified	unidentified	unidentified	unidentified
ASV718	0	44	0	0	0	0	0	0	0	0	0	0	0	0	0	0	0	44	Fungi{superkingdom}(100);Unassigned{phylum}(0);Unassigned{class}(0);Unassigned{order}(0);Unassigned{family}(0);Unassigned{genus}(0);Unassigned{species}(0)	Fungi	Unassigned	Unassigned	Unassigned	Unassigned	Unassigned	Unassigned
ASV719	0	0	0	0	0	9	0	0	0	0	0	0	0	0	0	0	0	9	Fungi{superkingdom}(100);Chytridiomycota{phylum}(100);Spizellomycetes{class}(100);Spizellomycetales{order}(100);Spizellomycetaceae{family}(100);unidentified{genus}(100);unidentified{species}(100)	Fungi	Chytridiomycota	Spizellomycetes	Spizellomycetales	Spizellomycetaceae	unidentified	unidentified
ASV724	0	0	0	0	0	0	0	0	0	0	0	0	0	164	0	0	0	164	Fungi{superkingdom}(100);Ascomycota{phylum}(100);Sordariomycetes{class}(100);Hypocreales{order}(100);Stachybotryaceae{family}(100);Unassigned{genus}(0);Unassigned{species}(0)	Fungi	Ascomycota	Sordariomycetes	Hypocreales	Stachybotryaceae	Unassigned	Unassigned
ASV725	0	0	0	0	3	0	0	0	0	0	0	0	0	0	0	0	0	3	Fungi{superkingdom}(69);Ascomycota{phylum}(69);Dothideomycetes{class}(69);Pleosporales{order}(69);Unassigned{family}(0);Unassigned{genus}(0);Unassigned{species}(0)	Fungi	Ascomycota	Dothideomycetes	Pleosporales	Unassigned	Unassigned	Unassigned
ASV726	0	0	0	0	0	0	0	0	0	0	0	0	0	0	57	0	0	57	Fungi{superkingdom}(93);Ascomycota{phylum}(93);Sordariomycetes{class}(93);Trichosphaeriales{order}(93);Trichosphaeriaceae{family}(93);unidentified{genus}(93);unidentified{species}(93)	Fungi	Ascomycota	Sordariomycetes	Trichosphaeriales	Trichosphaeriaceae	unidentified	unidentified
ASV728	0	388	0	0	0	0	0	0	0	0	0	0	0	0	0	0	0	388	Fungi{superkingdom}(82);unidentified{phylum}(82);unidentified{class}(82);unidentified{order}(82);unidentified{family}(82);unidentified{genus}(82);unidentified{species}(82)	Fungi	unidentified	unidentified	unidentified	unidentified	unidentified	unidentified
ASV729	0	0	0	0	0	0	0	0	0	0	0	0	0	0	0	3	0	3	Fungi{superkingdom}(90);Ascomycota{phylum}(90);Dothideomycetes{class}(90);Dothideales{order}(90);Dothideales_fam_Incertae_sedis{family}(90);Selenophoma{genus}(90);Selenophoma_mahoniae{species}(90)	Fungi	Ascomycota	Dothideomycetes	Dothideales	Dothideales_fam_Incertae_sedis	Selenophoma	Selenophoma_mahoniae
ASV731	0	0	0	6	0	0	0	0	0	0	0	0	0	0	0	0	0	6	Fungi{superkingdom}(100);Unassigned{phylum}(0);Unassigned{class}(0);Unassigned{order}(0);Unassigned{family}(0);Unassigned{genus}(0);Unassigned{species}(0)	Fungi	Unassigned	Unassigned	Unassigned	Unassigned	Unassigned	Unassigned
ASV732	0	0	0	0	0	0	0	0	0	0	0	0	0	119	0	0	0	119	Fungi{superkingdom}(97);Ascomycota{phylum}(97);Dothideomycetes{class}(97);Pleosporales{order}(97);Pleosporaceae{family}(97);Alternaria{genus}(97);Alternaria_subcucurbitae{species}(97)	Fungi	Ascomycota	Dothideomycetes	Pleosporales	Pleosporaceae	Alternaria	Alternaria_subcucurbitae
ASV737	0	0	0	0	0	0	0	0	190	0	0	0	16	40	0	0	0	246	Fungi{superkingdom}(61);Basidiomycota{phylum}(61);Agaricomycetes{class}(61);Unassigned{order}(0);Unassigned{family}(0);Unassigned{genus}(0);Unassigned{species}(0)	Fungi	Basidiomycota	Agaricomycetes	Unassigned	Unassigned	Unassigned	Unassigned
ASV743	0	0	0	0	0	0	0	0	0	0	72	0	0	0	0	0	0	72	Fungi{superkingdom}(72);unidentified{phylum}(72);unidentified{class}(72);unidentified{order}(72);unidentified{family}(72);unidentified{genus}(72);unidentified{species}(72)	Fungi	unidentified	unidentified	unidentified	unidentified	unidentified	unidentified
ASV744	0	0	0	26	49	0	0	0	0	0	0	0	0	0	0	0	0	75	Fungi{superkingdom}(69);unidentified{phylum}(69);unidentified{class}(69);unidentified{order}(69);unidentified{family}(69);unidentified{genus}(69);unidentified{species}(69)	Fungi	unidentified	unidentified	unidentified	unidentified	unidentified	unidentified
ASV745	0	0	0	0	15	0	0	0	0	0	0	0	0	0	0	0	0	15	Fungi{superkingdom}(100);Ascomycota{phylum}(100);Dothideomycetes{class}(100);Pleosporales{order}(100);Sporormiaceae{family}(100);Unassigned{genus}(0);Unassigned{species}(0)	Fungi	Ascomycota	Dothideomycetes	Pleosporales	Sporormiaceae	Unassigned	Unassigned
ASV746	0	0	0	0	0	0	0	0	0	0	0	428	0	0	0	0	0	428	Fungi{superkingdom}(100);Ascomycota{phylum}(100);Orbiliomycetes{class}(100);Orbiliales{order}(100);Orbiliaceae{family}(100);Brachyphoris{genus}(100);Brachyphoris_oviparasitica{species}(100)	Fungi	Ascomycota	Orbiliomycetes	Orbiliales	Orbiliaceae	Brachyphoris	Brachyphoris_oviparasitica
ASV750	0	0	0	0	3	0	0	0	0	0	0	0	0	0	0	0	0	3	Fungi{superkingdom}(100);Ascomycota{phylum}(100);Eurotiomycetes{class}(100);Mycocaliciales{order}(100);Mycocaliciaceae{family}(100);Mycocalicium{genus}(100);Mycocalicium_victoriae{species}(100)	Fungi	Ascomycota	Eurotiomycetes	Mycocaliciales	Mycocaliciaceae	Mycocalicium	Mycocalicium_victoriae
ASV753	0	0	0	0	32	0	0	0	0	0	0	0	0	0	0	0	0	32	Fungi{superkingdom}(95);Basidiomycota{phylum}(95);Agaricomycetes{class}(95);Agaricales{order}(95);Agaricaceae{family}(95);Tulostoma{genus}(95);Tulostoma_kotlabae{species}(95)	Fungi	Basidiomycota	Agaricomycetes	Agaricales	Agaricaceae	Tulostoma	Tulostoma_kotlabae
ASV759	0	407	0	0	0	0	0	0	0	0	0	0	0	0	0	0	0	407	Fungi{superkingdom}(71);Chytridiomycota{phylum}(71);unidentified{class}(71);unidentified{order}(71);unidentified{family}(71);unidentified{genus}(71);unidentified{species}(71)	Fungi	Chytridiomycota	unidentified	unidentified	unidentified	unidentified	unidentified
ASV760	0	0	0	0	8	0	0	0	0	0	0	0	0	0	0	0	0	8	Fungi{superkingdom}(100);Ascomycota{phylum}(100);Eurotiomycetes{class}(100);Chaetothyriales{order}(100);Herpotrichiellaceae{family}(100);Capronia{genus}(100);Capronia_semi-immersa{species}(100)	Fungi	Ascomycota	Eurotiomycetes	Chaetothyriales	Herpotrichiellaceae	Capronia	Capronia_semi-immersa
ASV762	0	0	0	0	0	0	0	0	0	0	0	351	0	0	0	0	0	351	Fungi{superkingdom}(97);Ascomycota{phylum}(97);Dothideomycetes{class}(97);Pleosporales{order}(97);Phaeosphaeriaceae{family}(97);Paraphoma{genus}(97);Paraphoma_chrysanthemicola{species}(97)	Fungi	Ascomycota	Dothideomycetes	Pleosporales	Phaeosphaeriaceae	Paraphoma	Paraphoma_chrysanthemicola
ASV765	0	0	0	0	4	12	0	0	0	0	0	0	0	0	0	0	0	16	Fungi{superkingdom}(62);Ascomycota{phylum}(62);Sordariomycetes{class}(62);Hypocreales{order}(62);Unassigned{family}(0);Unassigned{genus}(0);Unassigned{species}(0)	Fungi	Ascomycota	Sordariomycetes	Hypocreales	Unassigned	Unassigned	Unassigned
ASV768	0	0	62	0	0	0	0	0	0	0	0	0	0	0	0	0	0	62	Fungi{superkingdom}(63);unidentified{phylum}(63);unidentified{class}(63);unidentified{order}(63);unidentified{family}(63);unidentified{genus}(63);unidentified{species}(63)	Fungi	unidentified	unidentified	unidentified	unidentified	unidentified	unidentified
ASV772	0	0	0	64	0	0	0	0	0	0	0	0	0	0	0	0	0	64	Fungi{superkingdom}(73);Glomeromycota{phylum}(73);Glomeromycetes{class}(73);Glomerales{order}(73);Glomeraceae{family}(73);Glomus{genus}(73);Glomus_aggregatum{species}(73)	Fungi	Glomeromycota	Glomeromycetes	Glomerales	Glomeraceae	Glomus	Glomus_aggregatum
ASV773	0	0	0	0	0	0	0	0	0	0	0	52	0	0	0	0	0	52	Fungi{superkingdom}(64);unidentified{phylum}(64);unidentified{class}(64);unidentified{order}(64);unidentified{family}(64);unidentified{genus}(64);unidentified{species}(64)	Fungi	unidentified	unidentified	unidentified	unidentified	unidentified	unidentified
ASV774	0	0	0	0	8	0	0	0	37	0	0	0	35	0	102	21	0	203	Fungi{superkingdom}(100);Unassigned{phylum}(0);Unassigned{class}(0);Unassigned{order}(0);Unassigned{family}(0);Unassigned{genus}(0);Unassigned{species}(0)	Fungi	Unassigned	Unassigned	Unassigned	Unassigned	Unassigned	Unassigned
ASV776	21	0	0	0	0	0	0	0	0	0	0	0	0	0	0	0	0	21	Fungi{superkingdom}(66);unidentified{phylum}(66);unidentified{class}(66);unidentified{order}(66);unidentified{family}(66);unidentified{genus}(66);unidentified{species}(66)	Fungi	unidentified	unidentified	unidentified	unidentified	unidentified	unidentified
ASV778	0	0	0	5	0	0	0	0	0	0	0	0	0	0	0	0	0	5	Fungi{superkingdom}(83);unidentified{phylum}(83);unidentified{class}(83);unidentified{order}(83);unidentified{family}(83);unidentified{genus}(83);unidentified{species}(83)	Fungi	unidentified	unidentified	unidentified	unidentified	unidentified	unidentified
ASV787	0	17	0	0	0	0	0	0	0	0	0	0	0	0	0	0	0	17	Fungi{superkingdom}(77);Ascomycota{phylum}(77);Unassigned{class}(0);Unassigned{order}(0);Unassigned{family}(0);Unassigned{genus}(0);Unassigned{species}(0)	Fungi	Ascomycota	Unassigned	Unassigned	Unassigned	Unassigned	Unassigned
ASV788	0	0	0	0	0	0	0	0	351	0	0	0	0	0	0	0	0	351	Fungi{superkingdom}(100);Ascomycota{phylum}(100);Dothideomycetes{class}(100);Pleosporales{order}(100);Phaeosphaeriaceae{family}(100);Setophoma{genus}(100);Setophoma_terrestris{species}(100)	Fungi	Ascomycota	Dothideomycetes	Pleosporales	Phaeosphaeriaceae	Setophoma	Setophoma_terrestris
ASV789	0	372	0	0	0	0	0	0	0	0	0	0	0	0	0	0	0	372	Fungi{superkingdom}(100);Unassigned{phylum}(0);Unassigned{class}(0);Unassigned{order}(0);Unassigned{family}(0);Unassigned{genus}(0);Unassigned{species}(0)	Fungi	Unassigned	Unassigned	Unassigned	Unassigned	Unassigned	Unassigned
ASV790	0	0	131	0	41	4	0	0	0	0	0	0	0	0	0	0	0	176	Fungi{superkingdom}(100);Unassigned{phylum}(0);Unassigned{class}(0);Unassigned{order}(0);Unassigned{family}(0);Unassigned{genus}(0);Unassigned{species}(0)	Fungi	Unassigned	Unassigned	Unassigned	Unassigned	Unassigned	Unassigned
ASV791	0	0	0	0	0	0	0	0	0	0	0	0	0	0	371	0	0	371	Fungi{superkingdom}(100);Unassigned{phylum}(0);Unassigned{class}(0);Unassigned{order}(0);Unassigned{family}(0);Unassigned{genus}(0);Unassigned{species}(0)	Fungi	Unassigned	Unassigned	Unassigned	Unassigned	Unassigned	Unassigned
ASV792	0	0	0	0	0	0	0	0	0	0	0	0	0	0	0	102	0	102	Fungi{superkingdom}(86);Ascomycota{phylum}(86);Sordariomycetes{class}(86);Hypocreales{order}(86);Nectriaceae{family}(86);Fusarium{genus}(86);Unassigned{species}(0)	Fungi	Ascomycota	Sordariomycetes	Hypocreales	Nectriaceae	Fusarium	Unassigned
ASV793	0	203	0	0	0	0	0	0	0	0	0	0	0	0	0	0	0	203	Fungi{superkingdom}(95);Ascomycota{phylum}(95);Eurotiomycetes{class}(95);Chaetothyriales{order}(95);unidentified{family}(95);unidentified{genus}(95);unidentified{species}(95)	Fungi	Ascomycota	Eurotiomycetes	Chaetothyriales	unidentified	unidentified	unidentified
ASV794	0	0	0	0	0	0	0	0	0	0	0	29	0	0	0	0	0	29	Fungi{superkingdom}(76);Basidiomycota{phylum}(76);Agaricomycetes{class}(76);unidentified{order}(76);unidentified{family}(76);unidentified{genus}(76);unidentified{species}(76)	Fungi	Basidiomycota	Agaricomycetes	unidentified	unidentified	unidentified	unidentified
ASV796	0	0	0	0	0	0	0	0	0	0	0	25	0	0	0	0	0	25	Fungi{superkingdom}(99);Ascomycota{phylum}(99);Eurotiomycetes{class}(99);Chaetothyriales{order}(99);unidentified{family}(99);unidentified{genus}(99);unidentified{species}(99)	Fungi	Ascomycota	Eurotiomycetes	Chaetothyriales	unidentified	unidentified	unidentified
ASV797	0	0	90	0	0	0	0	0	0	0	0	0	0	0	0	0	0	90	Fungi{superkingdom}(84);Glomeromycota{phylum}(84);Glomeromycetes{class}(84);Glomerales{order}(84);Glomeraceae{family}(84);Glomus{genus}(84);Glomus_aggregatum{species}(84)	Fungi	Glomeromycota	Glomeromycetes	Glomerales	Glomeraceae	Glomus	Glomus_aggregatum
ASV798	0	0	0	0	28	0	0	0	0	0	0	0	0	0	0	0	0	28	Fungi{superkingdom}(62);Basidiomycota{phylum}(62);Agaricomycetes{class}(62);Unassigned{order}(0);Unassigned{family}(0);Unassigned{genus}(0);Unassigned{species}(0)	Fungi	Basidiomycota	Agaricomycetes	Unassigned	Unassigned	Unassigned	Unassigned
ASV800	0	162	0	0	0	0	0	0	0	0	0	0	0	0	0	18	35	215	Fungi{superkingdom}(77);Ascomycota{phylum}(77);Sordariomycetes{class}(77);Hypocreales{order}(77);Clavicipitaceae{family}(77);Metarhizium{genus}(77);Unassigned{species}(0)	Fungi	Ascomycota	Sordariomycetes	Hypocreales	Clavicipitaceae	Metarhizium	Unassigned
ASV802	0	0	39	0	0	0	0	0	0	0	0	0	0	0	0	0	0	39	Fungi{superkingdom}(83);Ascomycota{phylum}(83);Dothideomycetes{class}(83);Pleosporales{order}(83);Camarosporidiellaceae{family}(83);Camarosporidiella{genus}(83);Camarosporidiella_mackenziei{species}(83)	Fungi	Ascomycota	Dothideomycetes	Pleosporales	Camarosporidiellaceae	Camarosporidiella	Camarosporidiella_mackenziei
ASV803	0	15	0	0	0	0	0	0	0	0	0	0	0	0	0	0	0	15	Fungi{superkingdom}(100);Ascomycota{phylum}(100);Dothideomycetes{class}(100);Capnodiales{order}(100);Mycosphaerellaceae{family}(100);Mycosphaerella{genus}(100);Mycosphaerella_tassiana{species}(100)	Fungi	Ascomycota	Dothideomycetes	Capnodiales	Mycosphaerellaceae	Mycosphaerella	Mycosphaerella_tassiana
ASV804	0	0	0	0	0	21	0	0	0	0	0	0	0	0	0	0	0	21	Fungi{superkingdom}(100);Ascomycota{phylum}(100);Sordariomycetes{class}(100);Microascales{order}(100);Microascaceae{family}(100);Microascus{genus}(100);Unassigned{species}(0)	Fungi	Ascomycota	Sordariomycetes	Microascales	Microascaceae	Microascus	Unassigned
ASV806	0	0	0	0	0	0	0	0	0	0	0	315	0	0	0	0	0	315	Fungi{superkingdom}(63);Ascomycota{phylum}(63);Dothideomycetes{class}(63);Pleosporales{order}(63);Phaeosphaeriaceae{family}(63);Paraphoma{genus}(63);Paraphoma_chlamydocopiosa{species}(63)	Fungi	Ascomycota	Dothideomycetes	Pleosporales	Phaeosphaeriaceae	Paraphoma	Paraphoma_chlamydocopiosa
ASV807	0	185	0	0	0	0	0	0	0	0	0	0	0	0	0	0	0	185	Fungi{superkingdom}(78);Ascomycota{phylum}(78);Unassigned{class}(0);Unassigned{order}(0);Unassigned{family}(0);Unassigned{genus}(0);Unassigned{species}(0)	Fungi	Ascomycota	Unassigned	Unassigned	Unassigned	Unassigned	Unassigned
ASV809	0	0	0	0	20	0	0	0	0	0	0	0	0	53	34	0	0	107	Fungi{superkingdom}(100);Unassigned{phylum}(0);Unassigned{class}(0);Unassigned{order}(0);Unassigned{family}(0);Unassigned{genus}(0);Unassigned{species}(0)	Fungi	Unassigned	Unassigned	Unassigned	Unassigned	Unassigned	Unassigned
ASV811	58	11	0	0	39	0	0	0	0	0	0	0	0	0	0	0	0	108	Fungi{superkingdom}(90);unidentified{phylum}(90);unidentified{class}(90);unidentified{order}(90);unidentified{family}(90);unidentified{genus}(90);unidentified{species}(90)	Fungi	unidentified	unidentified	unidentified	unidentified	unidentified	unidentified
ASV816	271	0	0	0	0	0	0	0	0	0	0	0	0	0	0	0	0	271	Fungi{superkingdom}(100);Unassigned{phylum}(0);Unassigned{class}(0);Unassigned{order}(0);Unassigned{family}(0);Unassigned{genus}(0);Unassigned{species}(0)	Fungi	Unassigned	Unassigned	Unassigned	Unassigned	Unassigned	Unassigned
ASV817	0	0	0	0	0	0	0	0	0	0	0	0	0	0	0	346	0	346	Fungi{superkingdom}(65);unidentified{phylum}(65);unidentified{class}(65);unidentified{order}(65);unidentified{family}(65);unidentified{genus}(65);unidentified{species}(65)	Fungi	unidentified	unidentified	unidentified	unidentified	unidentified	unidentified
ASV819	0	0	12	0	0	0	0	59	0	33	54	35	0	0	0	0	0	193	Fungi{superkingdom}(97);unidentified{phylum}(97);unidentified{class}(97);unidentified{order}(97);unidentified{family}(97);unidentified{genus}(97);unidentified{species}(97)	Fungi	unidentified	unidentified	unidentified	unidentified	unidentified	unidentified
ASV820	0	0	0	0	193	0	0	0	0	0	0	0	0	0	0	0	0	193	Fungi{superkingdom}(68);Glomeromycota{phylum}(68);Glomeromycetes{class}(68);Glomerales{order}(68);Glomeraceae{family}(68);Unassigned{genus}(0);Unassigned{species}(0)	Fungi	Glomeromycota	Glomeromycetes	Glomerales	Glomeraceae	Unassigned	Unassigned
ASV822	0	17	0	20	0	0	0	0	0	0	0	9	0	16	36	29	0	127	Fungi{superkingdom}(73);Basidiomycota{phylum}(73);Tremellomycetes{class}(73);Tremellales{order}(73);Rhynchogastremataceae{family}(73);Papiliotrema{genus}(73);Papiliotrema_laurentii{species}(73)	Fungi	Basidiomycota	Tremellomycetes	Tremellales	Rhynchogastremataceae	Papiliotrema	Papiliotrema_laurentii
ASV825	0	0	0	0	0	0	0	0	0	0	0	0	0	0	3	0	0	3	Fungi{superkingdom}(65);unidentified{phylum}(65);unidentified{class}(65);unidentified{order}(65);unidentified{family}(65);unidentified{genus}(65);unidentified{species}(65)	Fungi	unidentified	unidentified	unidentified	unidentified	unidentified	unidentified
ASV827	0	0	0	304	0	0	0	0	0	0	0	0	0	0	0	0	0	304	Fungi{superkingdom}(89);Ascomycota{phylum}(89);Dothideomycetes{class}(89);Pleosporales{order}(89);Pleosporales_fam_Incertae_sedis{family}(89);Thyrostroma{genus}(89);Thyrostroma_cornicola{species}(89)	Fungi	Ascomycota	Dothideomycetes	Pleosporales	Pleosporales_fam_Incertae_sedis	Thyrostroma	Thyrostroma_cornicola
ASV828	0	0	0	0	0	0	0	0	0	0	0	0	0	0	0	44	0	44	Fungi{superkingdom}(74);unidentified{phylum}(74);unidentified{class}(74);unidentified{order}(74);unidentified{family}(74);unidentified{genus}(74);unidentified{species}(74)	Fungi	unidentified	unidentified	unidentified	unidentified	unidentified	unidentified
ASV831	0	0	0	0	0	0	0	0	0	0	0	0	0	287	0	47	0	334	Fungi{superkingdom}(100);Unassigned{phylum}(0);Unassigned{class}(0);Unassigned{order}(0);Unassigned{family}(0);Unassigned{genus}(0);Unassigned{species}(0)	Fungi	Unassigned	Unassigned	Unassigned	Unassigned	Unassigned	Unassigned
ASV835	0	165	0	0	0	0	0	0	0	58	0	0	0	0	0	0	0	223	Fungi{superkingdom}(94);Ascomycota{phylum}(94);Eurotiomycetes{class}(94);Chaetothyriales{order}(94);unidentified{family}(94);unidentified{genus}(94);unidentified{species}(94)	Fungi	Ascomycota	Eurotiomycetes	Chaetothyriales	unidentified	unidentified	unidentified
ASV837	0	0	0	0	0	2	0	0	0	0	0	0	0	0	0	0	0	2	Fungi{superkingdom}(94);Basidiomycota{phylum}(94);Agaricomycetes{class}(94);Sebacinales{order}(94);Sebacinaceae{family}(94);Efibulobasidium{genus}(94);Efibulobasidium_albescens{species}(94)	Fungi	Basidiomycota	Agaricomycetes	Sebacinales	Sebacinaceae	Efibulobasidium	Efibulobasidium_albescens
ASV840	0	0	0	0	0	0	0	0	0	0	0	183	0	0	0	0	0	183	Fungi{superkingdom}(75);unidentified{phylum}(75);unidentified{class}(75);unidentified{order}(75);unidentified{family}(75);unidentified{genus}(75);unidentified{species}(75)	Fungi	unidentified	unidentified	unidentified	unidentified	unidentified	unidentified
ASV841	0	0	0	0	0	0	0	0	0	0	0	0	0	17	280	0	0	297	Fungi{superkingdom}(100);Ascomycota{phylum}(100);Sordariomycetes{class}(100);Hypocreales{order}(100);Stachybotryaceae{family}(100);Stachybotrys{genus}(100);Stachybotrys_microspora{species}(100)	Fungi	Ascomycota	Sordariomycetes	Hypocreales	Stachybotryaceae	Stachybotrys	Stachybotrys_microspora
ASV842	0	0	0	0	11	0	0	0	0	0	0	123	0	0	0	0	0	134	Fungi{superkingdom}(77);Chytridiomycota{phylum}(77);Chytridiomycetes{class}(77);Chytridiales{order}(77);Chytridiaceae{family}(77);unidentified{genus}(77);unidentified{species}(77)	Fungi	Chytridiomycota	Chytridiomycetes	Chytridiales	Chytridiaceae	unidentified	unidentified
ASV844	0	264	0	0	0	0	0	0	0	0	0	0	0	0	0	0	0	264	Fungi{superkingdom}(97);Ascomycota{phylum}(97);Sordariomycetes{class}(97);Phomatosporales{order}(97);Phomatosporaceae{family}(97);Phomatospora{genus}(97);Phomatospora_biseriata{species}(97)	Fungi	Ascomycota	Sordariomycetes	Phomatosporales	Phomatosporaceae	Phomatospora	Phomatospora_biseriata
ASV851	46	0	0	48	0	0	0	0	0	0	0	0	0	0	0	0	0	94	Fungi{superkingdom}(98);Glomeromycota{phylum}(98);Glomeromycetes{class}(98);Glomerales{order}(98);Glomeraceae{family}(98);Glomus{genus}(98);Glomus_aggregatum{species}(98)	Fungi	Glomeromycota	Glomeromycetes	Glomerales	Glomeraceae	Glomus	Glomus_aggregatum
ASV852	0	0	0	0	0	0	0	0	0	0	0	25	0	0	0	293	0	318	Fungi{superkingdom}(100);Unassigned{phylum}(0);Unassigned{class}(0);Unassigned{order}(0);Unassigned{family}(0);Unassigned{genus}(0);Unassigned{species}(0)	Fungi	Unassigned	Unassigned	Unassigned	Unassigned	Unassigned	Unassigned
ASV853	0	0	50	0	0	0	0	0	0	0	0	0	0	0	0	0	0	50	Fungi{superkingdom}(69);Chytridiomycota{phylum}(69);unidentified{class}(69);unidentified{order}(69);unidentified{family}(69);unidentified{genus}(69);unidentified{species}(69)	Fungi	Chytridiomycota	unidentified	unidentified	unidentified	unidentified	unidentified
ASV856	0	5	0	0	0	0	0	0	0	0	0	0	0	0	0	16	0	21	Fungi{superkingdom}(100);Ascomycota{phylum}(100);Dothideomycetes{class}(100);Pleosporales{order}(100);Pleosporaceae{family}(100);Alternaria{genus}(100);Alternaria_chlamydosporigena{species}(100)	Fungi	Ascomycota	Dothideomycetes	Pleosporales	Pleosporaceae	Alternaria	Alternaria_chlamydosporigena
ASV857	0	0	0	0	0	0	0	0	0	0	0	0	0	0	12	0	0	12	Fungi{superkingdom}(68);Ascomycota{phylum}(68);unidentified{class}(68);unidentified{order}(68);unidentified{family}(68);unidentified{genus}(68);unidentified{species}(68)	Fungi	Ascomycota	unidentified	unidentified	unidentified	unidentified	unidentified
ASV858	0	62	0	0	0	0	0	0	0	0	0	0	0	0	0	0	0	62	Fungi{superkingdom}(100);Unassigned{phylum}(0);Unassigned{class}(0);Unassigned{order}(0);Unassigned{family}(0);Unassigned{genus}(0);Unassigned{species}(0)	Fungi	Unassigned	Unassigned	Unassigned	Unassigned	Unassigned	Unassigned
ASV859	24	151	0	0	0	0	0	0	0	0	0	0	0	0	0	0	0	175	Fungi{superkingdom}(75);Ascomycota{phylum}(75);unidentified{class}(75);unidentified{order}(75);unidentified{family}(75);unidentified{genus}(75);unidentified{species}(75)	Fungi	Ascomycota	unidentified	unidentified	unidentified	unidentified	unidentified
ASV860	0	17	0	0	0	0	0	0	0	0	0	0	0	0	0	0	0	17	Fungi{superkingdom}(76);Ascomycota{phylum}(76);Eurotiomycetes{class}(76);Chaetothyriales{order}(76);Herpotrichiellaceae{family}(76);Veronaea{genus}(76);Unassigned{species}(0)	Fungi	Ascomycota	Eurotiomycetes	Chaetothyriales	Herpotrichiellaceae	Veronaea	Unassigned
ASV865	0	0	0	0	61	0	0	0	0	0	0	0	0	0	129	0	0	190	Fungi{superkingdom}(96);unidentified{phylum}(96);unidentified{class}(96);unidentified{order}(96);unidentified{family}(96);unidentified{genus}(96);unidentified{species}(96)	Fungi	unidentified	unidentified	unidentified	unidentified	unidentified	unidentified
ASV870	0	0	0	0	0	0	0	0	0	0	26	0	0	0	0	118	0	144	Fungi{superkingdom}(77);Ascomycota{phylum}(77);Dothideomycetes{class}(77);Pleosporales{order}(77);Melanommataceae{family}(77);Herpotrichia{genus}(77);Herpotrichia_striatispora{species}(77)	Fungi	Ascomycota	Dothideomycetes	Pleosporales	Melanommataceae	Herpotrichia	Herpotrichia_striatispora
ASV871	0	0	0	0	0	0	0	0	0	297	0	0	0	0	0	0	0	297	Fungi{superkingdom}(100);Ascomycota{phylum}(100);Sordariomycetes{class}(100);Hypocreales{order}(100);Stachybotryaceae{family}(100);Stachybotrys{genus}(100);Stachybotrys_microspora{species}(100)	Fungi	Ascomycota	Sordariomycetes	Hypocreales	Stachybotryaceae	Stachybotrys	Stachybotrys_microspora
ASV874	0	0	0	0	0	0	0	0	0	0	0	102	0	0	0	0	0	102	Fungi{superkingdom}(95);unidentified{phylum}(95);unidentified{class}(95);unidentified{order}(95);unidentified{family}(95);unidentified{genus}(95);unidentified{species}(95)	Fungi	unidentified	unidentified	unidentified	unidentified	unidentified	unidentified
ASV876	0	0	0	0	43	0	0	0	0	0	0	0	0	0	0	0	0	43	Fungi{superkingdom}(90);unidentified{phylum}(90);unidentified{class}(90);unidentified{order}(90);unidentified{family}(90);unidentified{genus}(90);unidentified{species}(90)	Fungi	unidentified	unidentified	unidentified	unidentified	unidentified	unidentified
ASV878	12	0	0	0	0	0	0	0	0	0	0	0	0	0	0	0	0	12	Fungi{superkingdom}(70);Ascomycota{phylum}(70);Unassigned{class}(0);Unassigned{order}(0);Unassigned{family}(0);Unassigned{genus}(0);Unassigned{species}(0)	Fungi	Ascomycota	Unassigned	Unassigned	Unassigned	Unassigned	Unassigned
ASV879	0	9	0	0	0	0	0	0	0	0	0	0	0	0	0	0	0	9	Fungi{superkingdom}(100);Unassigned{phylum}(0);Unassigned{class}(0);Unassigned{order}(0);Unassigned{family}(0);Unassigned{genus}(0);Unassigned{species}(0)	Fungi	Unassigned	Unassigned	Unassigned	Unassigned	Unassigned	Unassigned
ASV882	0	198	0	0	0	0	0	0	0	0	0	0	0	0	0	0	0	198	Fungi{superkingdom}(73);Ascomycota{phylum}(73);Sordariomycetes{class}(73);Hypocreales{order}(73);Bionectriaceae{family}(73);Clonostachys{genus}(73);Clonostachys_rosea{species}(73)	Fungi	Ascomycota	Sordariomycetes	Hypocreales	Bionectriaceae	Clonostachys	Clonostachys_rosea
ASV883	0	0	0	0	0	0	0	0	0	0	0	0	0	0	0	75	0	75	Fungi{superkingdom}(93);Ascomycota{phylum}(93);Dothideomycetes{class}(93);Pleosporales{order}(93);Lophiostomataceae{family}(93);Lophiostoma{genus}(93);Lophiostoma_rosae{species}(93)	Fungi	Ascomycota	Dothideomycetes	Pleosporales	Lophiostomataceae	Lophiostoma	Lophiostoma_rosae
ASV885	0	0	0	0	0	0	0	0	0	0	0	0	0	0	272	0	0	272	Fungi{superkingdom}(100);Unassigned{phylum}(0);Unassigned{class}(0);Unassigned{order}(0);Unassigned{family}(0);Unassigned{genus}(0);Unassigned{species}(0)	Fungi	Unassigned	Unassigned	Unassigned	Unassigned	Unassigned	Unassigned
ASV887	0	286	0	0	0	0	0	0	0	0	0	0	0	0	0	0	0	286	Fungi{superkingdom}(96);Ascomycota{phylum}(96);Sordariomycetes{class}(96);Hypocreales{order}(96);Hypocreaceae{family}(96);Trichoderma{genus}(96);Trichoderma_lixii{species}(96)	Fungi	Ascomycota	Sordariomycetes	Hypocreales	Hypocreaceae	Trichoderma	Trichoderma_lixii
ASV888	0	0	0	0	0	0	0	0	0	0	0	0	0	19	0	0	0	19	Fungi{superkingdom}(75);Ascomycota{phylum}(75);Dothideomycetes{class}(75);Pleosporales{order}(75);Torulaceae{family}(75);Torula{genus}(75);Torula_masonii{species}(75)	Fungi	Ascomycota	Dothideomycetes	Pleosporales	Torulaceae	Torula	Torula_masonii
ASV889	0	0	9	0	0	0	0	0	0	0	0	0	0	0	0	0	0	9	Fungi{superkingdom}(100);Basidiomycota{phylum}(100);Cystobasidiomycetes{class}(100);Cystobasidiomycetes_ord_Incertae_sedis{order}(100);Buckleyzymaceae{family}(100);Buckleyzyma{genus}(100);Buckleyzyma_aurantiaca{species}(100)	Fungi	Basidiomycota	Cystobasidiomycetes	Cystobasidiomycetes_ord_Incertae_sedis	Buckleyzymaceae	Buckleyzyma	Buckleyzyma_aurantiaca
ASV890	0	14	0	0	0	0	0	0	0	0	0	0	0	0	0	0	0	14	Fungi{superkingdom}(92);Ascomycota{phylum}(92);Eurotiomycetes{class}(92);Chaetothyriales{order}(92);unidentified{family}(92);unidentified{genus}(92);unidentified{species}(92)	Fungi	Ascomycota	Eurotiomycetes	Chaetothyriales	unidentified	unidentified	unidentified
ASV892	0	0	0	0	0	0	0	0	0	0	24	11	0	0	0	0	0	35	Fungi{superkingdom}(70);unidentified{phylum}(70);unidentified{class}(70);unidentified{order}(70);unidentified{family}(70);unidentified{genus}(70);unidentified{species}(70)	Fungi	unidentified	unidentified	unidentified	unidentified	unidentified	unidentified
ASV893	6	0	0	9	0	0	0	0	0	0	0	35	0	0	0	0	0	50	Fungi{superkingdom}(97);Ascomycota{phylum}(97);Dothideomycetes{class}(97);Capnodiales{order}(97);Mycosphaerellaceae{family}(97);Mycosphaerella{genus}(97);Mycosphaerella_tassiana{species}(97)	Fungi	Ascomycota	Dothideomycetes	Capnodiales	Mycosphaerellaceae	Mycosphaerella	Mycosphaerella_tassiana
ASV894	0	0	0	0	0	0	0	0	0	0	0	51	0	0	0	0	0	51	Fungi{superkingdom}(78);Ascomycota{phylum}(78);Dothideomycetes{class}(78);Pleosporales{order}(78);Torulaceae{family}(78);Torula{genus}(78);Unassigned{species}(0)	Fungi	Ascomycota	Dothideomycetes	Pleosporales	Torulaceae	Torula	Unassigned
ASV895	0	0	0	0	0	0	0	0	0	0	189	0	0	0	0	0	0	189	Fungi{superkingdom}(100);Ascomycota{phylum}(100);Dothideomycetes{class}(100);Dothideales{order}(100);Unassigned{family}(0);Unassigned{genus}(0);Unassigned{species}(0)	Fungi	Ascomycota	Dothideomycetes	Dothideales	Unassigned	Unassigned	Unassigned
ASV899	0	0	0	0	13	11	0	0	0	0	0	0	0	0	0	0	0	24	Fungi{superkingdom}(100);Basidiomycota{phylum}(100);Agaricomycetes{class}(100);Phallales{order}(100);Phallaceae{family}(100);Lysurus{genus}(100);unidentified{species}(100)	Fungi	Basidiomycota	Agaricomycetes	Phallales	Phallaceae	Lysurus	unidentified
ASV902	0	0	0	0	0	0	0	0	0	21	59	0	0	0	0	0	0	80	Fungi{superkingdom}(64);Basidiomycota{phylum}(64);Agaricomycetes{class}(64);Unassigned{order}(0);Unassigned{family}(0);Unassigned{genus}(0);Unassigned{species}(0)	Fungi	Basidiomycota	Agaricomycetes	Unassigned	Unassigned	Unassigned	Unassigned
ASV907	0	0	0	0	0	0	0	0	0	0	0	0	0	0	0	0	169	169	Fungi{superkingdom}(71);unidentified{phylum}(71);unidentified{class}(71);unidentified{order}(71);unidentified{family}(71);unidentified{genus}(71);unidentified{species}(71)	Fungi	unidentified	unidentified	unidentified	unidentified	unidentified	unidentified
ASV911	0	0	0	0	0	0	0	0	0	0	0	0	0	193	0	0	0	193	Fungi{superkingdom}(83);unidentified{phylum}(83);unidentified{class}(83);unidentified{order}(83);unidentified{family}(83);unidentified{genus}(83);unidentified{species}(83)	Fungi	unidentified	unidentified	unidentified	unidentified	unidentified	unidentified
ASV912	59	0	0	0	23	0	0	0	0	0	0	0	0	0	0	0	0	82	Fungi{superkingdom}(91);unidentified{phylum}(91);unidentified{class}(91);unidentified{order}(91);unidentified{family}(91);unidentified{genus}(91);unidentified{species}(91)	Fungi	unidentified	unidentified	unidentified	unidentified	unidentified	unidentified
ASV913	0	261	0	0	0	0	0	0	0	0	0	0	0	0	0	0	0	261	Fungi{superkingdom}(77);Ascomycota{phylum}(77);Eurotiomycetes{class}(77);Chaetothyriales{order}(77);unidentified{family}(77);unidentified{genus}(77);unidentified{species}(77)	Fungi	Ascomycota	Eurotiomycetes	Chaetothyriales	unidentified	unidentified	unidentified
ASV914	0	0	11	0	0	0	0	0	14	0	0	0	0	0	0	0	9	34	Fungi{superkingdom}(96);unidentified{phylum}(96);unidentified{class}(96);unidentified{order}(96);unidentified{family}(96);unidentified{genus}(96);unidentified{species}(96)	Fungi	unidentified	unidentified	unidentified	unidentified	unidentified	unidentified
ASV916	0	13	0	0	0	0	0	0	0	0	0	0	0	0	0	63	0	76	Fungi{superkingdom}(100);Ascomycota{phylum}(100);Sordariomycetes{class}(100);Sordariales{order}(100);Chaetomiaceae{family}(100);Humicola{genus}(100);Unassigned{species}(0)	Fungi	Ascomycota	Sordariomycetes	Sordariales	Chaetomiaceae	Humicola	Unassigned
ASV917	0	0	0	0	0	0	0	0	0	0	0	0	0	0	125	12	0	137	Fungi{superkingdom}(100);Ascomycota{phylum}(100);Sordariomycetes{class}(100);Hypocreales{order}(100);Stachybotryaceae{family}(100);Stachybotrys{genus}(100);Stachybotrys_microspora{species}(100)	Fungi	Ascomycota	Sordariomycetes	Hypocreales	Stachybotryaceae	Stachybotrys	Stachybotrys_microspora
ASV918	0	0	0	0	0	0	0	0	0	0	141	0	0	0	0	0	0	141	Fungi{superkingdom}(100);Ascomycota{phylum}(100);Eurotiomycetes{class}(100);Onygenales{order}(100);Onygenales_fam_Incertae_sedis{family}(100);Chrysosporium{genus}(100);Chrysosporium_lobatum{species}(100)	Fungi	Ascomycota	Eurotiomycetes	Onygenales	Onygenales_fam_Incertae_sedis	Chrysosporium	Chrysosporium_lobatum
ASV923	0	0	0	0	0	0	0	0	0	0	0	56	0	0	0	0	0	56	Fungi{superkingdom}(81);Chytridiomycota{phylum}(81);unidentified{class}(81);unidentified{order}(81);unidentified{family}(81);unidentified{genus}(81);unidentified{species}(81)	Fungi	Chytridiomycota	unidentified	unidentified	unidentified	unidentified	unidentified
ASV924	0	21	0	92	24	16	0	0	0	0	0	0	0	0	0	3	0	156	Fungi{superkingdom}(65);unidentified{phylum}(65);unidentified{class}(65);unidentified{order}(65);unidentified{family}(65);unidentified{genus}(65);unidentified{species}(65)	Fungi	unidentified	unidentified	unidentified	unidentified	unidentified	unidentified
ASV925	0	0	0	0	3	0	0	0	0	0	0	0	0	0	0	0	0	3	Fungi{superkingdom}(100);Ascomycota{phylum}(100);Pezizomycetes{class}(100);Pezizales{order}(100);Pezizaceae{family}(100);Mattirolomyces{genus}(100);Mattirolomyces_spinosus{species}(100)	Fungi	Ascomycota	Pezizomycetes	Pezizales	Pezizaceae	Mattirolomyces	Mattirolomyces_spinosus
ASV931	0	51	0	0	0	0	0	0	0	0	0	0	0	0	0	0	0	51	Fungi{superkingdom}(100);Ascomycota{phylum}(100);Sordariomycetes{class}(100);Hypocreales{order}(100);Clavicipitaceae{family}(100);Metarhizium{genus}(100);Metarhizium_marquandii{species}(100)	Fungi	Ascomycota	Sordariomycetes	Hypocreales	Clavicipitaceae	Metarhizium	Metarhizium_marquandii
ASV934	0	0	0	0	15	0	0	0	0	0	0	0	0	0	0	0	0	15	Fungi{superkingdom}(97);Ascomycota{phylum}(97);Dothideomycetes{class}(97);Pleosporales{order}(97);Lophiostomataceae{family}(97);Unassigned{genus}(0);Unassigned{species}(0)	Fungi	Ascomycota	Dothideomycetes	Pleosporales	Lophiostomataceae	Unassigned	Unassigned
ASV947	0	83	0	0	6	0	0	0	0	0	0	0	0	0	0	0	0	89	Fungi{superkingdom}(100);Unassigned{phylum}(0);Unassigned{class}(0);Unassigned{order}(0);Unassigned{family}(0);Unassigned{genus}(0);Unassigned{species}(0)	Fungi	Unassigned	Unassigned	Unassigned	Unassigned	Unassigned	Unassigned
ASV951	0	0	0	0	0	0	0	0	0	0	0	109	0	0	0	0	0	109	Fungi{superkingdom}(100);Ascomycota{phylum}(100);Dothideomycetes{class}(100);Botryosphaeriales{order}(100);Aplosporellaceae{family}(100);Aplosporella{genus}(100);Unassigned{species}(0)	Fungi	Ascomycota	Dothideomycetes	Botryosphaeriales	Aplosporellaceae	Aplosporella	Unassigned
ASV953	0	0	0	0	0	0	0	0	0	0	0	253	0	0	0	0	0	253	Fungi{superkingdom}(72);Ascomycota{phylum}(72);Sordariomycetes{class}(72);Hypocreales{order}(72);Stachybotryaceae{family}(72);Paramyrothecium{genus}(72);Unassigned{species}(0)	Fungi	Ascomycota	Sordariomycetes	Hypocreales	Stachybotryaceae	Paramyrothecium	Unassigned
ASV954	0	0	0	0	0	0	0	0	0	0	0	15	0	0	0	0	0	15	Fungi{superkingdom}(92);unidentified{phylum}(92);unidentified{class}(92);unidentified{order}(92);unidentified{family}(92);unidentified{genus}(92);unidentified{species}(92)	Fungi	unidentified	unidentified	unidentified	unidentified	unidentified	unidentified
ASV961	40	0	0	0	0	0	0	0	0	0	0	0	0	0	0	0	0	40	Fungi{superkingdom}(91);Ascomycota{phylum}(91);Sordariomycetes{class}(91);Xylariales{order}(91);Diatrypaceae{family}(91);Monosporascus{genus}(91);unidentified{species}(91)	Fungi	Ascomycota	Sordariomycetes	Xylariales	Diatrypaceae	Monosporascus	unidentified
ASV964	0	5	0	0	0	0	0	0	0	0	0	0	0	208	0	28	0	241	Fungi{superkingdom}(100);Unassigned{phylum}(0);Unassigned{class}(0);Unassigned{order}(0);Unassigned{family}(0);Unassigned{genus}(0);Unassigned{species}(0)	Fungi	Unassigned	Unassigned	Unassigned	Unassigned	Unassigned	Unassigned
ASV965	0	0	0	0	0	201	0	0	0	0	0	0	0	0	0	0	0	201	Fungi{superkingdom}(100);Unassigned{phylum}(0);Unassigned{class}(0);Unassigned{order}(0);Unassigned{family}(0);Unassigned{genus}(0);Unassigned{species}(0)	Fungi	Unassigned	Unassigned	Unassigned	Unassigned	Unassigned	Unassigned
ASV973	0	0	0	0	43	0	0	0	0	0	0	0	0	0	66	0	0	109	Fungi{superkingdom}(60);unidentified{phylum}(60);unidentified{class}(60);unidentified{order}(60);unidentified{family}(60);unidentified{genus}(60);unidentified{species}(60)	Fungi	unidentified	unidentified	unidentified	unidentified	unidentified	unidentified
ASV974	0	0	0	0	0	0	0	0	0	0	0	156	0	0	0	0	0	156	Fungi{superkingdom}(81);unidentified{phylum}(81);unidentified{class}(81);unidentified{order}(81);unidentified{family}(81);unidentified{genus}(81);unidentified{species}(81)	Fungi	unidentified	unidentified	unidentified	unidentified	unidentified	unidentified
ASV982	0	0	0	0	0	6	0	0	0	0	0	0	0	0	0	0	0	6	Fungi{superkingdom}(100);Unassigned{phylum}(0);Unassigned{class}(0);Unassigned{order}(0);Unassigned{family}(0);Unassigned{genus}(0);Unassigned{species}(0)	Fungi	Unassigned	Unassigned	Unassigned	Unassigned	Unassigned	Unassigned
ASV985	0	13	0	0	0	0	0	0	0	0	0	0	0	0	0	0	0	13	Fungi{superkingdom}(92);Basidiomycota{phylum}(92);Unassigned{class}(0);Unassigned{order}(0);Unassigned{family}(0);Unassigned{genus}(0);Unassigned{species}(0)	Fungi	Basidiomycota	Unassigned	Unassigned	Unassigned	Unassigned	Unassigned
ASV987	45	0	0	0	0	12	0	0	0	0	0	0	0	0	0	0	0	57	Fungi{superkingdom}(98);unidentified{phylum}(98);unidentified{class}(98);unidentified{order}(98);unidentified{family}(98);unidentified{genus}(98);unidentified{species}(98)	Fungi	unidentified	unidentified	unidentified	unidentified	unidentified	unidentified
ASV990	5	0	0	0	0	0	0	0	0	0	0	0	0	0	0	0	0	5	Fungi{superkingdom}(72);Ascomycota{phylum}(72);Eurotiomycetes{class}(72);Chaetothyriales{order}(72);unidentified{family}(72);unidentified{genus}(72);unidentified{species}(72)	Fungi	Ascomycota	Eurotiomycetes	Chaetothyriales	unidentified	unidentified	unidentified
ASV991	0	0	0	0	0	49	37	0	0	0	0	0	0	0	0	0	0	86	Fungi{superkingdom}(71);Ascomycota{phylum}(71);Orbiliomycetes{class}(71);Orbiliales{order}(71);Orbiliaceae{family}(71);unidentified{genus}(71);unidentified{species}(71)	Fungi	Ascomycota	Orbiliomycetes	Orbiliales	Orbiliaceae	unidentified	unidentified
ASV994	0	0	0	0	0	0	0	29	0	53	0	6	0	0	43	0	0	131	Fungi{superkingdom}(74);Ascomycota{phylum}(74);Sordariomycetes{class}(74);Hypocreales{order}(74);Cordycipitaceae{family}(74);Simplicillium{genus}(74);Simplicillium_minatense{species}(74)	Fungi	Ascomycota	Sordariomycetes	Hypocreales	Cordycipitaceae	Simplicillium	Simplicillium_minatense
ASV995	0	24	0	0	0	0	0	0	0	0	0	0	0	0	0	0	0	24	Fungi{superkingdom}(100);Ascomycota{phylum}(100);Leotiomycetes{class}(100);Helotiales{order}(100);Helotiaceae{family}(100);Tetracladium{genus}(100);Tetracladium_furcatum{species}(100)	Fungi	Ascomycota	Leotiomycetes	Helotiales	Helotiaceae	Tetracladium	Tetracladium_furcatum
ASV1001	0	0	0	0	0	0	0	0	0	0	0	225	0	0	0	0	0	225	Fungi{superkingdom}(63);Chytridiomycota{phylum}(63);Unassigned{class}(0);Unassigned{order}(0);Unassigned{family}(0);Unassigned{genus}(0);Unassigned{species}(0)	Fungi	Chytridiomycota	Unassigned	Unassigned	Unassigned	Unassigned	Unassigned
ASV1005	0	51	0	55	0	0	0	0	0	0	0	0	0	0	0	0	0	106	Fungi{superkingdom}(90);Ascomycota{phylum}(90);Eurotiomycetes{class}(90);Chaetothyriales{order}(90);unidentified{family}(90);unidentified{genus}(90);unidentified{species}(90)	Fungi	Ascomycota	Eurotiomycetes	Chaetothyriales	unidentified	unidentified	unidentified
ASV1006	0	0	0	40	0	0	0	0	0	0	0	0	0	0	0	0	0	40	Fungi{superkingdom}(63);unidentified{phylum}(63);unidentified{class}(63);unidentified{order}(63);unidentified{family}(63);unidentified{genus}(63);unidentified{species}(63)	Fungi	unidentified	unidentified	unidentified	unidentified	unidentified	unidentified
ASV1011	0	35	0	0	0	0	0	0	0	0	0	0	0	0	0	61	0	96	Fungi{superkingdom}(97);Ascomycota{phylum}(97);Eurotiomycetes{class}(97);Chaetothyriales{order}(97);Trichomeriaceae{family}(97);Bradymyces{genus}(97);unidentified{species}(97)	Fungi	Ascomycota	Eurotiomycetes	Chaetothyriales	Trichomeriaceae	Bradymyces	unidentified
ASV1012	0	0	0	0	3	0	0	0	0	0	0	0	0	0	0	0	0	3	Fungi{superkingdom}(90);Basidiomycota{phylum}(90);Unassigned{class}(0);Unassigned{order}(0);Unassigned{family}(0);Unassigned{genus}(0);Unassigned{species}(0)	Fungi	Basidiomycota	Unassigned	Unassigned	Unassigned	Unassigned	Unassigned
ASV1015	0	0	0	0	0	0	0	0	0	0	0	0	0	11	0	0	0	11	Fungi{superkingdom}(100);Unassigned{phylum}(0);Unassigned{class}(0);Unassigned{order}(0);Unassigned{family}(0);Unassigned{genus}(0);Unassigned{species}(0)	Fungi	Unassigned	Unassigned	Unassigned	Unassigned	Unassigned	Unassigned
ASV1016	0	0	0	0	0	0	0	30	0	0	0	0	0	0	0	0	0	30	Fungi{superkingdom}(78);Ascomycota{phylum}(78);Sordariomycetes{class}(78);Hypocreales{order}(78);unidentified{family}(78);unidentified{genus}(78);unidentified{species}(78)	Fungi	Ascomycota	Sordariomycetes	Hypocreales	unidentified	unidentified	unidentified
ASV1018	71	10	0	0	0	0	0	0	0	0	34	0	0	0	0	0	0	115	Fungi{superkingdom}(100);Ascomycota{phylum}(100);Sordariomycetes{class}(100);Myrmecridiales{order}(100);Myrmecridiaceae{family}(100);Myrmecridium{genus}(100);Myrmecridium_thailandicum{species}(100)	Fungi	Ascomycota	Sordariomycetes	Myrmecridiales	Myrmecridiaceae	Myrmecridium	Myrmecridium_thailandicum
ASV1026	0	210	0	0	0	0	0	0	0	0	0	0	0	0	0	0	0	210	Fungi{superkingdom}(100);Unassigned{phylum}(0);Unassigned{class}(0);Unassigned{order}(0);Unassigned{family}(0);Unassigned{genus}(0);Unassigned{species}(0)	Fungi	Unassigned	Unassigned	Unassigned	Unassigned	Unassigned	Unassigned
ASV1028	0	0	0	0	0	0	0	0	0	0	0	9	0	0	0	0	0	9	Fungi{superkingdom}(65);Ascomycota{phylum}(65);Sordariomycetes{class}(65);Sordariales{order}(65);Unassigned{family}(0);Unassigned{genus}(0);Unassigned{species}(0)	Fungi	Ascomycota	Sordariomycetes	Sordariales	Unassigned	Unassigned	Unassigned
ASV1033	0	0	0	0	0	0	0	0	0	0	0	11	0	0	0	0	0	11	Fungi{superkingdom}(64);Ascomycota{phylum}(64);Unassigned{class}(0);Unassigned{order}(0);Unassigned{family}(0);Unassigned{genus}(0);Unassigned{species}(0)	Fungi	Ascomycota	Unassigned	Unassigned	Unassigned	Unassigned	Unassigned
ASV1034	0	0	0	0	0	0	0	0	0	0	0	0	0	0	0	0	11	11	Fungi{superkingdom}(87);unidentified{phylum}(87);unidentified{class}(87);unidentified{order}(87);unidentified{family}(87);unidentified{genus}(87);unidentified{species}(87)	Fungi	unidentified	unidentified	unidentified	unidentified	unidentified	unidentified
ASV1042	0	0	0	0	0	0	0	0	0	0	0	44	0	0	0	0	0	44	Fungi{superkingdom}(75);Basidiomycota{phylum}(75);Agaricomycetes{class}(75);unidentified{order}(75);unidentified{family}(75);unidentified{genus}(75);unidentified{species}(75)	Fungi	Basidiomycota	Agaricomycetes	unidentified	unidentified	unidentified	unidentified
ASV1043	0	0	0	0	0	0	0	0	0	32	0	0	0	0	0	0	0	32	Fungi{superkingdom}(76);unidentified{phylum}(76);unidentified{class}(76);unidentified{order}(76);unidentified{family}(76);unidentified{genus}(76);unidentified{species}(76)	Fungi	unidentified	unidentified	unidentified	unidentified	unidentified	unidentified
ASV1048	0	0	84	0	0	0	0	0	0	0	0	16	0	0	0	0	0	100	Fungi{superkingdom}(98);unidentified{phylum}(98);unidentified{class}(98);unidentified{order}(98);unidentified{family}(98);unidentified{genus}(98);unidentified{species}(98)	Fungi	unidentified	unidentified	unidentified	unidentified	unidentified	unidentified
ASV1050	0	0	0	0	0	0	0	0	2	0	0	0	0	0	77	0	0	79	Fungi{superkingdom}(71);unidentified{phylum}(71);unidentified{class}(71);unidentified{order}(71);unidentified{family}(71);unidentified{genus}(71);unidentified{species}(71)	Fungi	unidentified	unidentified	unidentified	unidentified	unidentified	unidentified
ASV1051	0	0	0	0	0	0	0	0	39	0	0	61	0	0	0	0	0	100	Fungi{superkingdom}(67);unidentified{phylum}(67);unidentified{class}(67);unidentified{order}(67);unidentified{family}(67);unidentified{genus}(67);unidentified{species}(67)	Fungi	unidentified	unidentified	unidentified	unidentified	unidentified	unidentified
ASV1053	0	21	19	0	0	0	7	0	0	0	20	0	0	0	44	0	0	111	Fungi{superkingdom}(90);unidentified{phylum}(90);unidentified{class}(90);unidentified{order}(90);unidentified{family}(90);unidentified{genus}(90);unidentified{species}(90)	Fungi	unidentified	unidentified	unidentified	unidentified	unidentified	unidentified
ASV1054	0	0	0	197	0	0	0	0	0	0	0	0	0	0	0	0	0	197	Fungi{superkingdom}(99);Ascomycota{phylum}(99);Dothideomycetes{class}(99);Pleosporales{order}(99);Didymellaceae{family}(99);Unassigned{genus}(0);Unassigned{species}(0)	Fungi	Ascomycota	Dothideomycetes	Pleosporales	Didymellaceae	Unassigned	Unassigned
ASV1055	0	0	0	0	0	0	0	0	0	0	0	22	0	0	0	0	0	22	Fungi{superkingdom}(96);Ascomycota{phylum}(96);Sordariomycetes{class}(96);Sordariales{order}(96);Chaetomiaceae{family}(96);Unassigned{genus}(0);Unassigned{species}(0)	Fungi	Ascomycota	Sordariomycetes	Sordariales	Chaetomiaceae	Unassigned	Unassigned
ASV1056	0	28	0	0	90	0	0	0	0	0	0	0	0	0	0	0	0	118	Fungi{superkingdom}(79);Ascomycota{phylum}(79);Sordariomycetes{class}(79);Xylariales{order}(79);Xylariales_fam_Incertae_sedis{family}(79);Phialemoniopsis{genus}(79);Phialemoniopsis_ocularis{species}(79)	Fungi	Ascomycota	Sordariomycetes	Xylariales	Xylariales_fam_Incertae_sedis	Phialemoniopsis	Phialemoniopsis_ocularis
ASV1073	0	0	77	0	0	0	0	0	0	0	0	0	0	113	0	0	0	190	Fungi{superkingdom}(100);Glomeromycota{phylum}(100);Glomeromycetes{class}(100);Glomerales{order}(100);Glomeraceae{family}(100);Unassigned{genus}(0);Unassigned{species}(0)	Fungi	Glomeromycota	Glomeromycetes	Glomerales	Glomeraceae	Unassigned	Unassigned
ASV1074	0	189	0	0	0	0	0	0	0	0	0	0	0	0	0	0	0	189	Fungi{superkingdom}(83);unidentified{phylum}(83);unidentified{class}(83);unidentified{order}(83);unidentified{family}(83);unidentified{genus}(83);unidentified{species}(83)	Fungi	unidentified	unidentified	unidentified	unidentified	unidentified	unidentified
ASV1075	0	0	0	0	0	0	0	0	0	89	0	0	0	0	0	0	0	89	Fungi{superkingdom}(100);Unassigned{phylum}(0);Unassigned{class}(0);Unassigned{order}(0);Unassigned{family}(0);Unassigned{genus}(0);Unassigned{species}(0)	Fungi	Unassigned	Unassigned	Unassigned	Unassigned	Unassigned	Unassigned
ASV1076	0	188	0	0	0	0	0	0	0	0	0	0	0	0	0	0	0	188	Fungi{superkingdom}(97);unidentified{phylum}(97);unidentified{class}(97);unidentified{order}(97);unidentified{family}(97);unidentified{genus}(97);unidentified{species}(97)	Fungi	unidentified	unidentified	unidentified	unidentified	unidentified	unidentified
ASV1077	0	0	10	6	0	23	0	0	0	0	0	19	0	0	0	0	0	58	Fungi{superkingdom}(100);Unassigned{phylum}(0);Unassigned{class}(0);Unassigned{order}(0);Unassigned{family}(0);Unassigned{genus}(0);Unassigned{species}(0)	Fungi	Unassigned	Unassigned	Unassigned	Unassigned	Unassigned	Unassigned
ASV1080	0	31	23	0	0	0	0	0	0	0	0	0	0	0	0	0	0	54	Fungi{superkingdom}(61);Ascomycota{phylum}(61);unidentified{class}(61);unidentified{order}(61);unidentified{family}(61);unidentified{genus}(61);unidentified{species}(61)	Fungi	Ascomycota	unidentified	unidentified	unidentified	unidentified	unidentified
ASV1082	3	0	0	0	0	0	0	0	0	0	0	0	0	0	0	0	0	3	Fungi{superkingdom}(100);Ascomycota{phylum}(100);Sordariomycetes{class}(100);Xylariales{order}(100);Xylariaceae{family}(100);Ascotricha{genus}(100);Ascotricha_guamensis{species}(100)	Fungi	Ascomycota	Sordariomycetes	Xylariales	Xylariaceae	Ascotricha	Ascotricha_guamensis
ASV1085	0	183	0	0	0	0	0	0	0	0	0	0	0	0	0	0	0	183	Fungi{superkingdom}(93);unidentified{phylum}(93);unidentified{class}(93);unidentified{order}(93);unidentified{family}(93);unidentified{genus}(93);unidentified{species}(93)	Fungi	unidentified	unidentified	unidentified	unidentified	unidentified	unidentified
ASV1086	0	0	0	0	0	0	0	20	0	0	0	0	0	0	0	0	33	53	Fungi{superkingdom}(91);unidentified{phylum}(91);unidentified{class}(91);unidentified{order}(91);unidentified{family}(91);unidentified{genus}(91);unidentified{species}(91)	Fungi	unidentified	unidentified	unidentified	unidentified	unidentified	unidentified
ASV1100	0	0	0	0	0	0	0	0	0	92	0	0	0	0	0	0	0	92	Fungi{superkingdom}(68);unidentified{phylum}(68);unidentified{class}(68);unidentified{order}(68);unidentified{family}(68);unidentified{genus}(68);unidentified{species}(68)	Fungi	unidentified	unidentified	unidentified	unidentified	unidentified	unidentified
ASV1103	0	0	0	0	0	0	0	0	0	0	0	0	0	0	52	0	0	52	Fungi{superkingdom}(67);unidentified{phylum}(67);unidentified{class}(67);unidentified{order}(67);unidentified{family}(67);unidentified{genus}(67);unidentified{species}(67)	Fungi	unidentified	unidentified	unidentified	unidentified	unidentified	unidentified
ASV1104	0	3	0	0	0	0	0	0	0	0	0	116	0	0	0	0	0	119	Fungi{superkingdom}(67);Ascomycota{phylum}(67);Unassigned{class}(0);Unassigned{order}(0);Unassigned{family}(0);Unassigned{genus}(0);Unassigned{species}(0)	Fungi	Ascomycota	Unassigned	Unassigned	Unassigned	Unassigned	Unassigned
ASV1105	0	0	0	0	0	0	0	0	0	0	0	65	0	0	0	0	0	65	Fungi{superkingdom}(80);unidentified{phylum}(80);unidentified{class}(80);unidentified{order}(80);unidentified{family}(80);unidentified{genus}(80);unidentified{species}(80)	Fungi	unidentified	unidentified	unidentified	unidentified	unidentified	unidentified
ASV1107	28	0	0	0	0	0	0	0	0	0	0	0	0	0	0	0	0	28	Fungi{superkingdom}(67);Basidiomycota{phylum}(67);Agaricomycetes{class}(67);Agaricales{order}(67);unidentified{family}(67);unidentified{genus}(67);unidentified{species}(67)	Fungi	Basidiomycota	Agaricomycetes	Agaricales	unidentified	unidentified	unidentified
ASV1109	0	0	0	0	0	0	0	0	0	0	0	0	0	0	0	6	0	6	Fungi{superkingdom}(66);unidentified{phylum}(66);unidentified{class}(66);unidentified{order}(66);unidentified{family}(66);unidentified{genus}(66);unidentified{species}(66)	Fungi	unidentified	unidentified	unidentified	unidentified	unidentified	unidentified
ASV1112	0	170	0	0	0	0	0	0	0	0	0	0	0	0	0	0	0	170	Fungi{superkingdom}(100);Unassigned{phylum}(0);Unassigned{class}(0);Unassigned{order}(0);Unassigned{family}(0);Unassigned{genus}(0);Unassigned{species}(0)	Fungi	Unassigned	Unassigned	Unassigned	Unassigned	Unassigned	Unassigned
ASV1113	0	157	0	0	0	0	0	0	0	0	0	0	0	0	0	0	0	157	Fungi{superkingdom}(100);Unassigned{phylum}(0);Unassigned{class}(0);Unassigned{order}(0);Unassigned{family}(0);Unassigned{genus}(0);Unassigned{species}(0)	Fungi	Unassigned	Unassigned	Unassigned	Unassigned	Unassigned	Unassigned
ASV1115	0	0	0	0	0	0	0	0	0	0	0	0	0	0	0	0	172	172	Fungi{superkingdom}(66);unidentified{phylum}(66);unidentified{class}(66);unidentified{order}(66);unidentified{family}(66);unidentified{genus}(66);unidentified{species}(66)	Fungi	unidentified	unidentified	unidentified	unidentified	unidentified	unidentified
ASV1117	0	0	0	0	0	0	0	0	0	0	0	0	0	112	0	0	0	112	Fungi{superkingdom}(69);Ascomycota{phylum}(69);Dothideomycetes{class}(69);Pleosporales{order}(69);Lophiostomataceae{family}(69);Lophiostoma{genus}(69);Unassigned{species}(0)	Fungi	Ascomycota	Dothideomycetes	Pleosporales	Lophiostomataceae	Lophiostoma	Unassigned
ASV1122	4	0	0	0	0	0	0	0	0	0	0	0	0	0	0	0	0	4	Fungi{superkingdom}(73);Basidiomycota{phylum}(73);Agaricomycetes{class}(73);Unassigned{order}(0);Unassigned{family}(0);Unassigned{genus}(0);Unassigned{species}(0)	Fungi	Basidiomycota	Agaricomycetes	Unassigned	Unassigned	Unassigned	Unassigned
ASV1126	0	0	0	0	0	0	166	0	0	0	0	0	0	0	0	0	0	166	Fungi{superkingdom}(89);unidentified{phylum}(89);unidentified{class}(89);unidentified{order}(89);unidentified{family}(89);unidentified{genus}(89);unidentified{species}(89)	Fungi	unidentified	unidentified	unidentified	unidentified	unidentified	unidentified
ASV1127	35	0	0	0	0	0	0	0	0	0	0	0	0	0	0	0	0	35	Fungi{superkingdom}(100);Ascomycota{phylum}(100);Arthoniomycetes{class}(100);Lichenostigmatales{order}(100);Phaeococcomycetaceae{family}(100);Phaeococcomyces{genus}(100);unidentified{species}(100)	Fungi	Ascomycota	Arthoniomycetes	Lichenostigmatales	Phaeococcomycetaceae	Phaeococcomyces	unidentified
ASV1128	26	0	0	0	0	0	0	0	0	0	0	0	0	0	0	0	0	26	Fungi{superkingdom}(72);unidentified{phylum}(72);unidentified{class}(72);unidentified{order}(72);unidentified{family}(72);unidentified{genus}(72);unidentified{species}(72)	Fungi	unidentified	unidentified	unidentified	unidentified	unidentified	unidentified
ASV1131	0	0	0	0	0	0	0	0	0	168	0	0	0	0	0	0	0	168	Fungi{superkingdom}(100);Unassigned{phylum}(0);Unassigned{class}(0);Unassigned{order}(0);Unassigned{family}(0);Unassigned{genus}(0);Unassigned{species}(0)	Fungi	Unassigned	Unassigned	Unassigned	Unassigned	Unassigned	Unassigned
ASV1134	0	0	0	0	0	0	0	0	0	0	0	0	0	0	0	12	0	12	Fungi{superkingdom}(63);Basidiomycota{phylum}(63);Agaricomycetes{class}(63);Unassigned{order}(0);Unassigned{family}(0);Unassigned{genus}(0);Unassigned{species}(0)	Fungi	Basidiomycota	Agaricomycetes	Unassigned	Unassigned	Unassigned	Unassigned
ASV1136	0	10	0	0	0	0	0	0	0	0	0	0	0	0	0	0	0	10	Fungi{superkingdom}(100);Ascomycota{phylum}(100);Eurotiomycetes{class}(100);Chaetothyriales{order}(100);Trichomeriaceae{family}(100);Knufia{genus}(100);Knufia_mediterranea{species}(100)	Fungi	Ascomycota	Eurotiomycetes	Chaetothyriales	Trichomeriaceae	Knufia	Knufia_mediterranea
ASV1145	0	37	0	0	0	0	0	0	0	0	0	0	0	0	0	23	0	60	Fungi{superkingdom}(100);Unassigned{phylum}(0);Unassigned{class}(0);Unassigned{order}(0);Unassigned{family}(0);Unassigned{genus}(0);Unassigned{species}(0)	Fungi	Unassigned	Unassigned	Unassigned	Unassigned	Unassigned	Unassigned
ASV1146	0	0	0	0	0	73	0	0	0	0	0	0	0	0	0	0	0	73	Fungi{superkingdom}(99);unidentified{phylum}(99);unidentified{class}(99);unidentified{order}(99);unidentified{family}(99);unidentified{genus}(99);unidentified{species}(99)	Fungi	unidentified	unidentified	unidentified	unidentified	unidentified	unidentified
ASV1154	0	0	0	0	0	0	0	0	160	0	0	0	0	0	0	0	0	160	Fungi{superkingdom}(100);Unassigned{phylum}(0);Unassigned{class}(0);Unassigned{order}(0);Unassigned{family}(0);Unassigned{genus}(0);Unassigned{species}(0)	Fungi	Unassigned	Unassigned	Unassigned	Unassigned	Unassigned	Unassigned
ASV1161	0	0	8	0	6	0	0	0	0	0	0	0	0	0	0	0	0	14	Fungi{superkingdom}(96);unidentified{phylum}(96);unidentified{class}(96);unidentified{order}(96);unidentified{family}(96);unidentified{genus}(96);unidentified{species}(96)	Fungi	unidentified	unidentified	unidentified	unidentified	unidentified	unidentified
ASV1162	0	0	0	0	0	0	0	0	7	0	0	0	0	0	0	0	14	21	Fungi{superkingdom}(100);Ascomycota{phylum}(100);Eurotiomycetes{class}(100);Eurotiales{order}(100);Aspergillaceae{family}(100);Aspergillus{genus}(100);Aspergillus_penicillioides{species}(100)	Fungi	Ascomycota	Eurotiomycetes	Eurotiales	Aspergillaceae	Aspergillus	Aspergillus_penicillioides
ASV1163	0	0	0	0	0	0	0	0	0	0	0	0	0	153	0	0	0	153	Fungi{superkingdom}(100);Unassigned{phylum}(0);Unassigned{class}(0);Unassigned{order}(0);Unassigned{family}(0);Unassigned{genus}(0);Unassigned{species}(0)	Fungi	Unassigned	Unassigned	Unassigned	Unassigned	Unassigned	Unassigned
ASV1165	0	0	0	0	0	0	0	0	0	0	0	0	0	0	0	49	0	49	Fungi{superkingdom}(97);Basidiomycota{phylum}(97);Tremellomycetes{class}(97);Filobasidiales{order}(97);Filobasidiaceae{family}(97);Naganishia{genus}(97);Naganishia_adeliensis{species}(97)	Fungi	Basidiomycota	Tremellomycetes	Filobasidiales	Filobasidiaceae	Naganishia	Naganishia_adeliensis
ASV1169	0	0	52	0	0	0	0	0	0	0	0	0	0	0	0	0	0	52	Fungi{superkingdom}(100);Unassigned{phylum}(0);Unassigned{class}(0);Unassigned{order}(0);Unassigned{family}(0);Unassigned{genus}(0);Unassigned{species}(0)	Fungi	Unassigned	Unassigned	Unassigned	Unassigned	Unassigned	Unassigned
ASV1171	0	0	0	0	0	0	0	72	0	0	0	0	0	0	15	0	0	87	Fungi{superkingdom}(89);unidentified{phylum}(89);unidentified{class}(89);unidentified{order}(89);unidentified{family}(89);unidentified{genus}(89);unidentified{species}(89)	Fungi	unidentified	unidentified	unidentified	unidentified	unidentified	unidentified
ASV1172	0	32	0	0	0	0	0	0	0	116	0	0	0	0	0	7	0	155	Fungi{superkingdom}(61);Ascomycota{phylum}(61);Eurotiomycetes{class}(61);Chaetothyriales{order}(61);unidentified{family}(61);unidentified{genus}(61);unidentified{species}(61)	Fungi	Ascomycota	Eurotiomycetes	Chaetothyriales	unidentified	unidentified	unidentified
ASV1176	0	0	0	0	0	0	0	0	0	0	0	85	0	0	0	0	0	85	Fungi{superkingdom}(97);unidentified{phylum}(97);unidentified{class}(97);unidentified{order}(97);unidentified{family}(97);unidentified{genus}(97);unidentified{species}(97)	Fungi	unidentified	unidentified	unidentified	unidentified	unidentified	unidentified
ASV1180	0	0	0	0	32	0	0	0	0	0	0	0	0	0	0	0	0	32	Fungi{superkingdom}(99);unidentified{phylum}(99);unidentified{class}(99);unidentified{order}(99);unidentified{family}(99);unidentified{genus}(99);unidentified{species}(99)	Fungi	unidentified	unidentified	unidentified	unidentified	unidentified	unidentified
ASV1182	0	0	0	0	0	0	0	152	0	0	0	0	0	0	0	0	0	152	Fungi{superkingdom}(97);Ascomycota{phylum}(97);Dothideomycetes{class}(97);Pleosporales{order}(97);Lophiostomataceae{family}(97);Lophiostoma{genus}(97);Unassigned{species}(0)	Fungi	Ascomycota	Dothideomycetes	Pleosporales	Lophiostomataceae	Lophiostoma	Unassigned
ASV1184	0	0	0	0	0	0	0	0	0	0	0	0	0	0	0	152	0	152	Fungi{superkingdom}(84);Basidiomycota{phylum}(84);Agaricomycetes{class}(84);Agaricales{order}(84);unidentified{family}(84);unidentified{genus}(84);unidentified{species}(84)	Fungi	Basidiomycota	Agaricomycetes	Agaricales	unidentified	unidentified	unidentified
ASV1190	0	0	0	2	0	0	0	0	0	0	0	0	0	0	0	0	0	2	Fungi{superkingdom}(100);Unassigned{phylum}(0);Unassigned{class}(0);Unassigned{order}(0);Unassigned{family}(0);Unassigned{genus}(0);Unassigned{species}(0)	Fungi	Unassigned	Unassigned	Unassigned	Unassigned	Unassigned	Unassigned
ASV1195	0	142	0	0	0	0	0	0	0	0	0	0	0	0	0	0	0	142	Fungi{superkingdom}(97);Glomeromycota{phylum}(97);Glomeromycetes{class}(97);Glomerales{order}(97);Glomeraceae{family}(97);Glomus{genus}(97);unidentified{species}(97)	Fungi	Glomeromycota	Glomeromycetes	Glomerales	Glomeraceae	Glomus	unidentified
ASV1196	0	0	0	0	0	65	0	0	0	0	0	0	0	0	0	0	0	65	Fungi{superkingdom}(90);Ascomycota{phylum}(90);Dothideomycetes{class}(90);Pleosporales{order}(90);Pleosporaceae{family}(90);Curvularia{genus}(90);Unassigned{species}(0)	Fungi	Ascomycota	Dothideomycetes	Pleosporales	Pleosporaceae	Curvularia	Unassigned
ASV1198	16	0	0	0	0	5	0	0	0	0	0	0	0	0	0	0	0	21	Fungi{superkingdom}(100);Unassigned{phylum}(0);Unassigned{class}(0);Unassigned{order}(0);Unassigned{family}(0);Unassigned{genus}(0);Unassigned{species}(0)	Fungi	Unassigned	Unassigned	Unassigned	Unassigned	Unassigned	Unassigned
ASV1199	0	68	0	0	0	0	0	0	0	0	0	0	0	0	0	0	0	68	Fungi{superkingdom}(92);Ascomycota{phylum}(92);Sordariomycetes{class}(92);Hypocreales{order}(92);Nectriaceae{family}(92);Fusarium{genus}(92);Fusarium_solani{species}(92)	Fungi	Ascomycota	Sordariomycetes	Hypocreales	Nectriaceae	Fusarium	Fusarium_solani
ASV1209	0	7	0	0	0	0	0	0	0	0	0	0	0	0	0	0	0	7	Fungi{superkingdom}(62);Ascomycota{phylum}(62);Leotiomycetes{class}(62);Thelebolales{order}(62);Pseudeurotiaceae{family}(62);Pseudogymnoascus{genus}(62);unidentified{species}(62)	Fungi	Ascomycota	Leotiomycetes	Thelebolales	Pseudeurotiaceae	Pseudogymnoascus	unidentified
ASV1213	0	0	0	0	0	0	0	0	0	0	0	143	0	0	0	0	0	143	Fungi{superkingdom}(100);Ascomycota{phylum}(100);Orbiliomycetes{class}(100);Orbiliales{order}(100);Orbiliaceae{family}(100);Unassigned{genus}(0);Unassigned{species}(0)	Fungi	Ascomycota	Orbiliomycetes	Orbiliales	Orbiliaceae	Unassigned	Unassigned
ASV1214	4	0	0	0	0	0	0	0	0	0	0	0	0	0	0	0	0	4	Fungi{superkingdom}(100);Unassigned{phylum}(0);Unassigned{class}(0);Unassigned{order}(0);Unassigned{family}(0);Unassigned{genus}(0);Unassigned{species}(0)	Fungi	Unassigned	Unassigned	Unassigned	Unassigned	Unassigned	Unassigned
ASV1215	0	53	0	0	0	0	0	0	0	0	0	0	0	0	0	0	0	53	Fungi{superkingdom}(82);Ascomycota{phylum}(82);Eurotiomycetes{class}(82);Chaetothyriales{order}(82);unidentified{family}(82);unidentified{genus}(82);unidentified{species}(82)	Fungi	Ascomycota	Eurotiomycetes	Chaetothyriales	unidentified	unidentified	unidentified
ASV1216	0	0	8	0	0	0	0	0	0	0	0	0	0	0	0	0	0	8	Fungi{superkingdom}(99);Ascomycota{phylum}(99);Eurotiomycetes{class}(99);Eurotiales{order}(99);Aspergillaceae{family}(99);Aspergillus{genus}(99);Aspergillus_pseudodeflectus{species}(99)	Fungi	Ascomycota	Eurotiomycetes	Eurotiales	Aspergillaceae	Aspergillus	Aspergillus_pseudodeflectus
ASV1217	0	0	0	0	0	0	0	0	0	0	0	0	0	45	0	0	0	45	Fungi{superkingdom}(99);Glomeromycota{phylum}(99);Glomeromycetes{class}(99);Glomerales{order}(99);Glomeraceae{family}(99);Unassigned{genus}(0);Unassigned{species}(0)	Fungi	Glomeromycota	Glomeromycetes	Glomerales	Glomeraceae	Unassigned	Unassigned
ASV1221	0	0	0	0	0	0	0	0	14	0	4	0	0	0	14	0	53	85	Fungi{superkingdom}(100);Basidiomycota{phylum}(100);Malasseziomycetes{class}(100);Malasseziales{order}(100);Malasseziaceae{family}(100);Malassezia{genus}(100);Malassezia_restricta{species}(100)	Fungi	Basidiomycota	Malasseziomycetes	Malasseziales	Malasseziaceae	Malassezia	Malassezia_restricta
ASV1222	0	9	0	0	0	0	0	0	0	0	0	0	0	0	0	38	0	47	Fungi{superkingdom}(99);Basidiomycota{phylum}(99);Tremellomycetes{class}(99);Filobasidiales{order}(99);Piskurozymaceae{family}(99);Solicoccozyma{genus}(99);Solicoccozyma_aeria{species}(99)	Fungi	Basidiomycota	Tremellomycetes	Filobasidiales	Piskurozymaceae	Solicoccozyma	Solicoccozyma_aeria
ASV1223	0	4	0	0	0	0	0	0	0	0	0	0	0	0	0	0	0	4	Fungi{superkingdom}(100);Ascomycota{phylum}(100);Dothideomycetes{class}(100);Pleosporales{order}(100);Sporormiaceae{family}(100);Sparticola{genus}(100);Sparticola_junci{species}(100)	Fungi	Ascomycota	Dothideomycetes	Pleosporales	Sporormiaceae	Sparticola	Sparticola_junci
ASV1228	0	0	0	0	0	0	0	0	0	14	0	0	0	0	0	0	0	14	Fungi{superkingdom}(75);Ascomycota{phylum}(75);Dothideomycetes{class}(75);Pleosporales{order}(75);Phaeosphaeriaceae{family}(75);Paraphoma{genus}(75);Paraphoma_chlamydocopiosa{species}(75)	Fungi	Ascomycota	Dothideomycetes	Pleosporales	Phaeosphaeriaceae	Paraphoma	Paraphoma_chlamydocopiosa
ASV1230	0	28	0	0	0	0	0	0	0	0	0	0	0	0	0	0	0	28	Fungi{superkingdom}(100);Ascomycota{phylum}(100);Eurotiomycetes{class}(100);Chaetothyriales{order}(100);Herpotrichiellaceae{family}(100);Exophiala{genus}(100);Unassigned{species}(0)	Fungi	Ascomycota	Eurotiomycetes	Chaetothyriales	Herpotrichiellaceae	Exophiala	Unassigned
ASV1236	0	0	0	0	0	0	0	0	0	0	0	107	0	0	0	0	0	107	Fungi{superkingdom}(93);unidentified{phylum}(93);unidentified{class}(93);unidentified{order}(93);unidentified{family}(93);unidentified{genus}(93);unidentified{species}(93)	Fungi	unidentified	unidentified	unidentified	unidentified	unidentified	unidentified
ASV1237	0	0	0	8	12	56	0	0	0	0	0	0	0	0	0	0	0	76	Fungi{superkingdom}(66);unidentified{phylum}(66);unidentified{class}(66);unidentified{order}(66);unidentified{family}(66);unidentified{genus}(66);unidentified{species}(66)	Fungi	unidentified	unidentified	unidentified	unidentified	unidentified	unidentified
ASV1239	0	0	0	0	0	0	117	0	0	0	0	0	0	0	0	0	0	117	Fungi{superkingdom}(98);Ascomycota{phylum}(98);Dothideomycetes{class}(98);Pleosporales{order}(98);Pleosporaceae{family}(98);Bipolaris{genus}(98);Bipolaris_microlaenae{species}(98)	Fungi	Ascomycota	Dothideomycetes	Pleosporales	Pleosporaceae	Bipolaris	Bipolaris_microlaenae
ASV1243	0	0	0	0	0	0	0	0	0	0	0	54	0	0	0	0	0	54	Fungi{superkingdom}(71);Basidiomycota{phylum}(71);Agaricomycetes{class}(71);Agaricales{order}(71);Agaricaceae{family}(71);Leucoagaricus{genus}(71);unidentified{species}(71)	Fungi	Basidiomycota	Agaricomycetes	Agaricales	Agaricaceae	Leucoagaricus	unidentified
ASV1245	0	136	0	0	0	0	0	0	0	0	0	0	0	0	0	0	0	136	Fungi{superkingdom}(100);Unassigned{phylum}(0);Unassigned{class}(0);Unassigned{order}(0);Unassigned{family}(0);Unassigned{genus}(0);Unassigned{species}(0)	Fungi	Unassigned	Unassigned	Unassigned	Unassigned	Unassigned	Unassigned
ASV1246	0	0	0	12	0	0	0	0	0	0	0	0	0	0	0	0	0	12	Fungi{superkingdom}(99);Ascomycota{phylum}(99);Pezizomycetes{class}(99);Pezizales{order}(99);Pezizales_fam_Incertae_sedis{family}(99);Trichobolus{genus}(99);Trichobolus_zukalii{species}(99)	Fungi	Ascomycota	Pezizomycetes	Pezizales	Pezizales_fam_Incertae_sedis	Trichobolus	Trichobolus_zukalii
ASV1247	0	0	0	0	0	0	0	0	0	0	0	0	0	0	19	0	0	19	Fungi{superkingdom}(61);Ascomycota{phylum}(61);Dothideomycetes{class}(61);Capnodiales{order}(61);Unassigned{family}(0);Unassigned{genus}(0);Unassigned{species}(0)	Fungi	Ascomycota	Dothideomycetes	Capnodiales	Unassigned	Unassigned	Unassigned
ASV1250	0	6	0	0	0	0	0	0	0	0	0	0	0	0	0	0	0	6	Fungi{superkingdom}(80);Ascomycota{phylum}(80);Dothideomycetes{class}(80);Pleosporales{order}(80);Unassigned{family}(0);Unassigned{genus}(0);Unassigned{species}(0)	Fungi	Ascomycota	Dothideomycetes	Pleosporales	Unassigned	Unassigned	Unassigned
ASV1253	0	0	0	0	0	0	78	0	0	0	0	0	0	0	0	0	0	78	Fungi{superkingdom}(98);Ascomycota{phylum}(98);Sordariomycetes{class}(98);Xylariales{order}(98);Unassigned{family}(0);Unassigned{genus}(0);Unassigned{species}(0)	Fungi	Ascomycota	Sordariomycetes	Xylariales	Unassigned	Unassigned	Unassigned
ASV1258	0	11	0	0	0	0	0	0	0	0	0	0	0	0	0	0	0	11	Fungi{superkingdom}(76);unidentified{phylum}(76);unidentified{class}(76);unidentified{order}(76);unidentified{family}(76);unidentified{genus}(76);unidentified{species}(76)	Fungi	unidentified	unidentified	unidentified	unidentified	unidentified	unidentified
ASV1262	0	0	0	0	0	0	132	0	0	0	0	0	0	0	0	0	0	132	Fungi{superkingdom}(89);unidentified{phylum}(89);unidentified{class}(89);unidentified{order}(89);unidentified{family}(89);unidentified{genus}(89);unidentified{species}(89)	Fungi	unidentified	unidentified	unidentified	unidentified	unidentified	unidentified
ASV1263	0	0	0	0	0	0	0	0	0	0	0	0	0	0	0	132	0	132	Fungi{superkingdom}(99);unidentified{phylum}(99);unidentified{class}(99);unidentified{order}(99);unidentified{family}(99);unidentified{genus}(99);unidentified{species}(99)	Fungi	unidentified	unidentified	unidentified	unidentified	unidentified	unidentified
ASV1264	0	131	0	0	0	0	0	0	0	0	0	0	0	0	0	0	0	131	Fungi{superkingdom}(71);Ascomycota{phylum}(71);Eurotiomycetes{class}(71);Chaetothyriales{order}(71);unidentified{family}(71);unidentified{genus}(71);unidentified{species}(71)	Fungi	Ascomycota	Eurotiomycetes	Chaetothyriales	unidentified	unidentified	unidentified
ASV1265	0	4	0	0	0	0	0	0	0	12	0	0	40	0	0	24	0	80	Fungi{superkingdom}(87);unidentified{phylum}(87);unidentified{class}(87);unidentified{order}(87);unidentified{family}(87);unidentified{genus}(87);unidentified{species}(87)	Fungi	unidentified	unidentified	unidentified	unidentified	unidentified	unidentified
ASV1269	0	0	0	0	0	0	0	0	0	0	0	0	0	64	0	0	0	64	Fungi{superkingdom}(75);unidentified{phylum}(75);unidentified{class}(75);unidentified{order}(75);unidentified{family}(75);unidentified{genus}(75);unidentified{species}(75)	Fungi	unidentified	unidentified	unidentified	unidentified	unidentified	unidentified
ASV1272	0	0	0	0	0	0	0	0	0	0	0	60	0	0	0	0	0	60	Fungi{superkingdom}(66);Ascomycota{phylum}(66);Orbiliomycetes{class}(66);Orbiliales{order}(66);Orbiliaceae{family}(66);unidentified{genus}(66);unidentified{species}(66)	Fungi	Ascomycota	Orbiliomycetes	Orbiliales	Orbiliaceae	unidentified	unidentified
ASV1275	0	0	0	0	0	0	0	0	0	0	0	32	0	0	0	0	0	32	Fungi{superkingdom}(100);Unassigned{phylum}(0);Unassigned{class}(0);Unassigned{order}(0);Unassigned{family}(0);Unassigned{genus}(0);Unassigned{species}(0)	Fungi	Unassigned	Unassigned	Unassigned	Unassigned	Unassigned	Unassigned
ASV1277	0	0	0	0	0	0	0	0	0	0	0	0	0	129	0	0	0	129	Fungi{superkingdom}(74);unidentified{phylum}(74);unidentified{class}(74);unidentified{order}(74);unidentified{family}(74);unidentified{genus}(74);unidentified{species}(74)	Fungi	unidentified	unidentified	unidentified	unidentified	unidentified	unidentified
ASV1280	0	0	0	0	0	0	0	0	0	19	0	0	0	0	0	0	0	19	Fungi{superkingdom}(67);Ascomycota{phylum}(67);Dothideomycetes{class}(67);Pleosporales{order}(67);Didymellaceae{family}(67);Calophoma{genus}(67);Calophoma_rosae{species}(67)	Fungi	Ascomycota	Dothideomycetes	Pleosporales	Didymellaceae	Calophoma	Calophoma_rosae
ASV1283	0	0	0	0	0	0	0	0	0	0	0	0	0	0	0	22	0	22	Fungi{superkingdom}(72);unidentified{phylum}(72);unidentified{class}(72);unidentified{order}(72);unidentified{family}(72);unidentified{genus}(72);unidentified{species}(72)	Fungi	unidentified	unidentified	unidentified	unidentified	unidentified	unidentified
ASV1285	0	0	0	0	0	0	0	123	0	0	0	0	0	0	0	0	0	123	Fungi{superkingdom}(87);Ascomycota{phylum}(87);Dothideomycetes{class}(87);Pleosporales{order}(87);Sporormiaceae{family}(87);Preussia{genus}(87);Unassigned{species}(0)	Fungi	Ascomycota	Dothideomycetes	Pleosporales	Sporormiaceae	Preussia	Unassigned
ASV1294	0	0	0	0	125	0	0	0	0	0	0	0	0	0	0	0	0	125	Fungi{superkingdom}(98);Ascomycota{phylum}(98);Sordariomycetes{class}(98);Hypocreales{order}(98);Nectriaceae{family}(98);Fusarium{genus}(98);Fusarium_solani{species}(98)	Fungi	Ascomycota	Sordariomycetes	Hypocreales	Nectriaceae	Fusarium	Fusarium_solani
ASV1302	0	0	0	0	0	0	0	0	0	0	0	0	0	14	0	0	0	14	Fungi{superkingdom}(100);Ascomycota{phylum}(100);Dothideomycetes{class}(100);Pleosporales{order}(100);Sporormiaceae{family}(100);Sporormiella{genus}(100);Sporormiella_similis{species}(100)	Fungi	Ascomycota	Dothideomycetes	Pleosporales	Sporormiaceae	Sporormiella	Sporormiella_similis
ASV1305	0	0	0	0	0	0	0	56	0	0	0	0	0	0	0	0	38	94	Fungi{superkingdom}(100);Basidiomycota{phylum}(100);Tremellomycetes{class}(100);Tremellales{order}(100);Tremellaceae{family}(100);Cryptococcus{genus}(100);Cryptococcus_uniguttulatus{species}(100)	Fungi	Basidiomycota	Tremellomycetes	Tremellales	Tremellaceae	Cryptococcus	Cryptococcus_uniguttulatus
ASV1306	0	0	0	0	0	0	0	0	0	0	0	0	0	0	124	0	0	124	Fungi{superkingdom}(62);Ascomycota{phylum}(62);Sordariomycetes{class}(62);Unassigned{order}(0);Unassigned{family}(0);Unassigned{genus}(0);Unassigned{species}(0)	Fungi	Ascomycota	Sordariomycetes	Unassigned	Unassigned	Unassigned	Unassigned
ASV1310	0	0	2	0	0	0	0	0	0	0	0	0	0	20	0	0	0	22	Fungi{superkingdom}(100);Ascomycota{phylum}(100);Eurotiomycetes{class}(100);Eurotiales{order}(100);Aspergillaceae{family}(100);Penicillium{genus}(100);Unassigned{species}(0)	Fungi	Ascomycota	Eurotiomycetes	Eurotiales	Aspergillaceae	Penicillium	Unassigned
ASV1316	0	0	53	0	0	0	0	0	0	0	0	0	0	0	0	0	0	53	Fungi{superkingdom}(61);unidentified{phylum}(61);unidentified{class}(61);unidentified{order}(61);unidentified{family}(61);unidentified{genus}(61);unidentified{species}(61)	Fungi	unidentified	unidentified	unidentified	unidentified	unidentified	unidentified
ASV1321	0	0	0	0	0	0	0	0	0	48	0	0	0	0	0	0	0	48	Fungi{superkingdom}(88);unidentified{phylum}(88);unidentified{class}(88);unidentified{order}(88);unidentified{family}(88);unidentified{genus}(88);unidentified{species}(88)	Fungi	unidentified	unidentified	unidentified	unidentified	unidentified	unidentified
ASV1322	0	0	0	0	0	0	0	121	0	0	0	0	0	0	0	0	0	121	Fungi{superkingdom}(70);unidentified{phylum}(70);unidentified{class}(70);unidentified{order}(70);unidentified{family}(70);unidentified{genus}(70);unidentified{species}(70)	Fungi	unidentified	unidentified	unidentified	unidentified	unidentified	unidentified
ASV1324	0	0	0	0	0	0	0	0	0	95	0	0	0	0	0	0	0	95	Fungi{superkingdom}(81);Ascomycota{phylum}(81);Sordariomycetes{class}(81);Sordariales{order}(81);Chaetomiaceae{family}(81);Unassigned{genus}(0);Unassigned{species}(0)	Fungi	Ascomycota	Sordariomycetes	Sordariales	Chaetomiaceae	Unassigned	Unassigned
ASV1325	0	0	0	0	0	0	0	0	7	0	88	0	0	0	0	0	0	95	Fungi{superkingdom}(98);unidentified{phylum}(98);unidentified{class}(98);unidentified{order}(98);unidentified{family}(98);unidentified{genus}(98);unidentified{species}(98)	Fungi	unidentified	unidentified	unidentified	unidentified	unidentified	unidentified
ASV1326	0	0	0	0	0	0	0	0	0	120	0	0	0	0	0	0	0	120	Fungi{superkingdom}(71);Chytridiomycota{phylum}(71);unidentified{class}(71);unidentified{order}(71);unidentified{family}(71);unidentified{genus}(71);unidentified{species}(71)	Fungi	Chytridiomycota	unidentified	unidentified	unidentified	unidentified	unidentified
ASV1329	0	0	0	0	0	0	0	0	0	0	0	33	0	0	0	0	0	33	Fungi{superkingdom}(84);unidentified{phylum}(84);unidentified{class}(84);unidentified{order}(84);unidentified{family}(84);unidentified{genus}(84);unidentified{species}(84)	Fungi	unidentified	unidentified	unidentified	unidentified	unidentified	unidentified
ASV1331	0	0	0	0	0	0	0	0	26	0	0	0	0	0	0	0	0	26	Fungi{superkingdom}(99);unidentified{phylum}(99);unidentified{class}(99);unidentified{order}(99);unidentified{family}(99);unidentified{genus}(99);unidentified{species}(99)	Fungi	unidentified	unidentified	unidentified	unidentified	unidentified	unidentified
ASV1333	0	0	0	0	0	0	0	0	0	0	0	119	0	0	0	0	0	119	Fungi{superkingdom}(91);Chytridiomycota{phylum}(91);unidentified{class}(91);unidentified{order}(91);unidentified{family}(91);unidentified{genus}(91);unidentified{species}(91)	Fungi	Chytridiomycota	unidentified	unidentified	unidentified	unidentified	unidentified
ASV1334	0	118	0	0	0	0	0	0	0	0	0	0	0	0	0	0	0	118	Fungi{superkingdom}(92);unidentified{phylum}(92);unidentified{class}(92);unidentified{order}(92);unidentified{family}(92);unidentified{genus}(92);unidentified{species}(92)	Fungi	unidentified	unidentified	unidentified	unidentified	unidentified	unidentified
ASV1335	0	0	0	2	0	0	0	0	0	0	0	0	0	0	0	0	0	2	Fungi{superkingdom}(75);Basidiomycota{phylum}(75);Unassigned{class}(0);Unassigned{order}(0);Unassigned{family}(0);Unassigned{genus}(0);Unassigned{species}(0)	Fungi	Basidiomycota	Unassigned	Unassigned	Unassigned	Unassigned	Unassigned
ASV1337	0	0	0	0	0	0	0	0	0	0	0	0	0	0	4	0	0	4	Fungi{superkingdom}(61);Ascomycota{phylum}(61);Dothideomycetes{class}(61);Dothideomycetes_ord_Incertae_sedis{order}(61);Eremomycetaceae{family}(61);Arthrographis{genus}(61);unidentified{species}(61)	Fungi	Ascomycota	Dothideomycetes	Dothideomycetes_ord_Incertae_sedis	Eremomycetaceae	Arthrographis	unidentified
ASV1340	0	0	3	0	0	0	0	0	0	0	0	0	0	0	0	0	0	3	Fungi{superkingdom}(100);Unassigned{phylum}(0);Unassigned{class}(0);Unassigned{order}(0);Unassigned{family}(0);Unassigned{genus}(0);Unassigned{species}(0)	Fungi	Unassigned	Unassigned	Unassigned	Unassigned	Unassigned	Unassigned
ASV1351	0	0	0	0	0	0	0	0	0	0	0	0	0	0	0	0	39	39	Fungi{superkingdom}(98);unidentified{phylum}(98);unidentified{class}(98);unidentified{order}(98);unidentified{family}(98);unidentified{genus}(98);unidentified{species}(98)	Fungi	unidentified	unidentified	unidentified	unidentified	unidentified	unidentified
ASV1352	0	0	0	2	0	0	0	0	0	0	0	0	0	0	0	0	0	2	Fungi{superkingdom}(74);Ascomycota{phylum}(74);Unassigned{class}(0);Unassigned{order}(0);Unassigned{family}(0);Unassigned{genus}(0);Unassigned{species}(0)	Fungi	Ascomycota	Unassigned	Unassigned	Unassigned	Unassigned	Unassigned
ASV1355	0	0	0	0	0	0	0	0	0	0	0	0	0	0	0	66	0	66	Fungi{superkingdom}(100);Ascomycota{phylum}(100);Dothideomycetes{class}(100);Pleosporales{order}(100);Leptosphaeriaceae{family}(100);Ampelomyces{genus}(100);unidentified{species}(100)	Fungi	Ascomycota	Dothideomycetes	Pleosporales	Leptosphaeriaceae	Ampelomyces	unidentified
ASV1359	0	0	44	0	0	0	0	0	0	0	0	0	0	0	0	0	0	44	Fungi{superkingdom}(100);Unassigned{phylum}(0);Unassigned{class}(0);Unassigned{order}(0);Unassigned{family}(0);Unassigned{genus}(0);Unassigned{species}(0)	Fungi	Unassigned	Unassigned	Unassigned	Unassigned	Unassigned	Unassigned
ASV1361	0	0	0	0	0	109	0	0	0	0	0	0	0	0	0	0	0	109	Fungi{superkingdom}(100);Ascomycota{phylum}(100);Sordariomycetes{class}(100);Xylariales{order}(100);Diatrypaceae{family}(100);Monosporascus{genus}(100);Monosporascus_eutypoides{species}(100)	Fungi	Ascomycota	Sordariomycetes	Xylariales	Diatrypaceae	Monosporascus	Monosporascus_eutypoides
ASV1367	0	0	0	0	0	0	0	0	74	0	0	39	0	0	0	0	0	113	Fungi{superkingdom}(100);Unassigned{phylum}(0);Unassigned{class}(0);Unassigned{order}(0);Unassigned{family}(0);Unassigned{genus}(0);Unassigned{species}(0)	Fungi	Unassigned	Unassigned	Unassigned	Unassigned	Unassigned	Unassigned
ASV1374	0	10	0	0	0	0	0	0	0	0	0	0	0	0	0	0	0	10	Fungi{superkingdom}(68);unidentified{phylum}(68);unidentified{class}(68);unidentified{order}(68);unidentified{family}(68);unidentified{genus}(68);unidentified{species}(68)	Fungi	unidentified	unidentified	unidentified	unidentified	unidentified	unidentified
ASV1376	0	0	0	0	0	0	0	0	0	0	0	0	0	0	0	17	0	17	Fungi{superkingdom}(100);Ascomycota{phylum}(100);Eurotiomycetes{class}(100);Chaetothyriales{order}(100);Trichomeriaceae{family}(100);Knufia{genus}(100);Knufia_tsunedae{species}(100)	Fungi	Ascomycota	Eurotiomycetes	Chaetothyriales	Trichomeriaceae	Knufia	Knufia_tsunedae
ASV1378	0	110	0	0	0	0	0	0	0	0	0	0	0	0	0	0	0	110	Fungi{superkingdom}(100);Chytridiomycota{phylum}(100);Chytridiomycetes{class}(100);Chytridiales{order}(100);Chytridiaceae{family}(100);Phlyctochytrium{genus}(100);Phlyctochytrium_africanum{species}(100)	Fungi	Chytridiomycota	Chytridiomycetes	Chytridiales	Chytridiaceae	Phlyctochytrium	Phlyctochytrium_africanum
ASV1381	0	0	0	0	0	0	0	26	0	0	0	0	0	0	0	25	0	51	Fungi{superkingdom}(75);unidentified{phylum}(75);unidentified{class}(75);unidentified{order}(75);unidentified{family}(75);unidentified{genus}(75);unidentified{species}(75)	Fungi	unidentified	unidentified	unidentified	unidentified	unidentified	unidentified
ASV1385	0	109	0	0	0	0	0	0	0	0	0	0	0	0	0	0	0	109	Fungi{superkingdom}(75);Glomeromycota{phylum}(75);Glomeromycetes{class}(75);Glomerales{order}(75);Glomeraceae{family}(75);Unassigned{genus}(0);Unassigned{species}(0)	Fungi	Glomeromycota	Glomeromycetes	Glomerales	Glomeraceae	Unassigned	Unassigned
ASV1386	0	19	0	0	0	0	0	0	0	0	0	0	0	0	0	0	0	19	Fungi{superkingdom}(100);Unassigned{phylum}(0);Unassigned{class}(0);Unassigned{order}(0);Unassigned{family}(0);Unassigned{genus}(0);Unassigned{species}(0)	Fungi	Unassigned	Unassigned	Unassigned	Unassigned	Unassigned	Unassigned
ASV1392	0	0	0	0	0	0	0	0	0	0	0	13	0	0	0	0	0	13	Fungi{superkingdom}(61);unidentified{phylum}(61);unidentified{class}(61);unidentified{order}(61);unidentified{family}(61);unidentified{genus}(61);unidentified{species}(61)	Fungi	unidentified	unidentified	unidentified	unidentified	unidentified	unidentified
ASV1393	0	0	0	0	0	0	0	109	0	0	0	0	0	0	0	0	0	109	Fungi{superkingdom}(100);Unassigned{phylum}(0);Unassigned{class}(0);Unassigned{order}(0);Unassigned{family}(0);Unassigned{genus}(0);Unassigned{species}(0)	Fungi	Unassigned	Unassigned	Unassigned	Unassigned	Unassigned	Unassigned
ASV1394	0	0	108	0	0	0	0	0	0	0	0	0	0	0	0	0	0	108	Fungi{superkingdom}(100);Unassigned{phylum}(0);Unassigned{class}(0);Unassigned{order}(0);Unassigned{family}(0);Unassigned{genus}(0);Unassigned{species}(0)	Fungi	Unassigned	Unassigned	Unassigned	Unassigned	Unassigned	Unassigned
ASV1396	0	0	0	0	0	0	0	0	0	0	39	0	0	0	28	0	0	67	Fungi{superkingdom}(99);Ascomycota{phylum}(99);Dothideomycetes{class}(99);Pleosporales{order}(99);Sporormiaceae{family}(99);Preussia{genus}(99);Unassigned{species}(0)	Fungi	Ascomycota	Dothideomycetes	Pleosporales	Sporormiaceae	Preussia	Unassigned
ASV1400	0	0	0	0	0	0	0	0	0	0	0	0	0	0	0	108	0	108	Fungi{superkingdom}(100);Blastocladiomycota{phylum}(100);Blastocladiomycetes{class}(100);Blastocladiales{order}(100);Catenariaceae{family}(100);unidentified{genus}(100);unidentified{species}(100)	Fungi	Blastocladiomycota	Blastocladiomycetes	Blastocladiales	Catenariaceae	unidentified	unidentified
ASV1403	0	0	0	0	0	0	0	0	0	0	0	0	0	0	0	0	29	29	Fungi{superkingdom}(100);Unassigned{phylum}(0);Unassigned{class}(0);Unassigned{order}(0);Unassigned{family}(0);Unassigned{genus}(0);Unassigned{species}(0)	Fungi	Unassigned	Unassigned	Unassigned	Unassigned	Unassigned	Unassigned
ASV1406	0	0	0	0	0	0	0	0	0	0	0	0	0	0	0	11	0	11	Fungi{superkingdom}(82);unidentified{phylum}(82);unidentified{class}(82);unidentified{order}(82);unidentified{family}(82);unidentified{genus}(82);unidentified{species}(82)	Fungi	unidentified	unidentified	unidentified	unidentified	unidentified	unidentified
ASV1407	0	0	0	0	0	0	0	0	0	107	0	0	0	0	0	0	0	107	Fungi{superkingdom}(100);Unassigned{phylum}(0);Unassigned{class}(0);Unassigned{order}(0);Unassigned{family}(0);Unassigned{genus}(0);Unassigned{species}(0)	Fungi	Unassigned	Unassigned	Unassigned	Unassigned	Unassigned	Unassigned
ASV1410	0	0	0	0	106	0	0	0	0	0	0	0	0	0	0	0	0	106	Fungi{superkingdom}(100);Basidiomycota{phylum}(100);Agaricomycetes{class}(100);Agaricales{order}(100);Tricholomataceae{family}(100);Melanoleuca{genus}(100);Unassigned{species}(0)	Fungi	Basidiomycota	Agaricomycetes	Agaricales	Tricholomataceae	Melanoleuca	Unassigned
ASV1412	0	0	0	0	0	0	0	0	0	0	0	0	0	23	0	0	0	23	Fungi{superkingdom}(62);Ascomycota{phylum}(62);Dothideomycetes{class}(62);Pleosporales{order}(62);Phaeosphaeriaceae{family}(62);Paraphoma{genus}(62);Paraphoma_chrysanthemicola{species}(62)	Fungi	Ascomycota	Dothideomycetes	Pleosporales	Phaeosphaeriaceae	Paraphoma	Paraphoma_chrysanthemicola
ASV1417	0	0	0	0	0	0	0	0	0	0	0	95	0	0	0	0	0	95	Fungi{superkingdom}(97);Ascomycota{phylum}(97);Eurotiomycetes{class}(97);Eurotiales{order}(97);Aspergillaceae{family}(97);Aspergillus{genus}(97);Aspergillus_pseudodeflectus{species}(97)	Fungi	Ascomycota	Eurotiomycetes	Eurotiales	Aspergillaceae	Aspergillus	Aspergillus_pseudodeflectus
ASV1418	0	0	0	0	0	0	0	0	0	12	0	6	0	0	0	0	0	18	Fungi{superkingdom}(80);unidentified{phylum}(80);unidentified{class}(80);unidentified{order}(80);unidentified{family}(80);unidentified{genus}(80);unidentified{species}(80)	Fungi	unidentified	unidentified	unidentified	unidentified	unidentified	unidentified
ASV1420	0	49	0	0	0	0	0	0	0	0	0	0	0	0	0	0	0	49	Fungi{superkingdom}(74);Basidiomycota{phylum}(74);Agaricomycetes{class}(74);unidentified{order}(74);unidentified{family}(74);unidentified{genus}(74);unidentified{species}(74)	Fungi	Basidiomycota	Agaricomycetes	unidentified	unidentified	unidentified	unidentified
ASV1421	0	0	0	0	16	0	0	0	0	0	0	0	0	0	0	0	0	16	Fungi{superkingdom}(60);Mortierellomycota{phylum}(60);Mortierellomycetes{class}(60);Mortierellales{order}(60);unidentified{family}(60);unidentified{genus}(60);unidentified{species}(60)	Fungi	Mortierellomycota	Mortierellomycetes	Mortierellales	unidentified	unidentified	unidentified
ASV1430	0	0	0	0	0	0	0	0	0	0	0	0	0	0	20	0	0	20	Fungi{superkingdom}(94);Ascomycota{phylum}(94);Eurotiomycetes{class}(94);Chaetothyriales{order}(94);unidentified{family}(94);unidentified{genus}(94);unidentified{species}(94)	Fungi	Ascomycota	Eurotiomycetes	Chaetothyriales	unidentified	unidentified	unidentified
ASV1434	0	0	0	0	0	0	0	0	0	0	0	0	0	0	63	0	0	63	Fungi{superkingdom}(72);Ascomycota{phylum}(72);Dothideomycetes{class}(72);Pleosporales{order}(72);Pleosporaceae{family}(72);Bipolaris{genus}(72);Bipolaris_maydis{species}(72)	Fungi	Ascomycota	Dothideomycetes	Pleosporales	Pleosporaceae	Bipolaris	Bipolaris_maydis
ASV1438	7	0	0	0	0	0	0	0	0	0	0	0	0	0	0	0	0	7	Fungi{superkingdom}(100);Ascomycota{phylum}(100);Eurotiomycetes{class}(100);Eurotiales{order}(100);Aspergillaceae{family}(100);Aspergillus{genus}(100);Aspergillus_discophorus{species}(100)	Fungi	Ascomycota	Eurotiomycetes	Eurotiales	Aspergillaceae	Aspergillus	Aspergillus_discophorus
ASV1441	0	0	0	0	0	0	0	0	0	0	0	0	0	35	16	0	0	51	Fungi{superkingdom}(68);unidentified{phylum}(68);unidentified{class}(68);unidentified{order}(68);unidentified{family}(68);unidentified{genus}(68);unidentified{species}(68)	Fungi	unidentified	unidentified	unidentified	unidentified	unidentified	unidentified
ASV1444	0	101	0	0	0	0	0	0	0	0	0	0	0	0	0	0	0	101	Fungi{superkingdom}(66);Chytridiomycota{phylum}(66);unidentified{class}(66);unidentified{order}(66);unidentified{family}(66);unidentified{genus}(66);unidentified{species}(66)	Fungi	Chytridiomycota	unidentified	unidentified	unidentified	unidentified	unidentified
ASV1445	0	27	0	0	0	0	0	0	0	0	0	0	0	0	0	0	0	27	Fungi{superkingdom}(81);unidentified{phylum}(81);unidentified{class}(81);unidentified{order}(81);unidentified{family}(81);unidentified{genus}(81);unidentified{species}(81)	Fungi	unidentified	unidentified	unidentified	unidentified	unidentified	unidentified
ASV1451	0	0	0	0	0	0	0	0	0	0	0	0	0	0	0	101	0	101	Fungi{superkingdom}(100);Ascomycota{phylum}(100);Sordariomycetes{class}(100);Sordariales{order}(100);Chaetomiaceae{family}(100);Thielavia{genus}(100);Thielavia_basicola{species}(100)	Fungi	Ascomycota	Sordariomycetes	Sordariales	Chaetomiaceae	Thielavia	Thielavia_basicola
ASV1452	32	0	0	0	10	0	0	0	0	0	0	0	0	0	0	0	0	42	Fungi{superkingdom}(100);Unassigned{phylum}(0);Unassigned{class}(0);Unassigned{order}(0);Unassigned{family}(0);Unassigned{genus}(0);Unassigned{species}(0)	Fungi	Unassigned	Unassigned	Unassigned	Unassigned	Unassigned	Unassigned
ASV1453	0	12	0	0	0	0	0	0	0	0	0	0	0	0	0	0	0	12	Fungi{superkingdom}(100);Unassigned{phylum}(0);Unassigned{class}(0);Unassigned{order}(0);Unassigned{family}(0);Unassigned{genus}(0);Unassigned{species}(0)	Fungi	Unassigned	Unassigned	Unassigned	Unassigned	Unassigned	Unassigned
ASV1457	0	0	0	0	0	0	71	0	0	0	0	0	0	0	0	0	0	71	Fungi{superkingdom}(91);unidentified{phylum}(91);unidentified{class}(91);unidentified{order}(91);unidentified{family}(91);unidentified{genus}(91);unidentified{species}(91)	Fungi	unidentified	unidentified	unidentified	unidentified	unidentified	unidentified
ASV1459	0	4	0	0	0	4	0	38	0	0	0	0	0	2	0	0	0	48	Fungi{superkingdom}(99);Ascomycota{phylum}(99);Sordariomycetes{class}(99);Glomerellales{order}(99);Plectosphaerellaceae{family}(99);Verticillium{genus}(99);Verticillium_leptobactrum{species}(99)	Fungi	Ascomycota	Sordariomycetes	Glomerellales	Plectosphaerellaceae	Verticillium	Verticillium_leptobactrum
ASV1463	0	0	0	0	0	0	0	0	0	0	0	0	99	0	0	0	0	99	Fungi{superkingdom}(63);Basidiomycota{phylum}(63);Agaricomycetes{class}(63);Unassigned{order}(0);Unassigned{family}(0);Unassigned{genus}(0);Unassigned{species}(0)	Fungi	Basidiomycota	Agaricomycetes	Unassigned	Unassigned	Unassigned	Unassigned
ASV1464	0	0	0	3	15	0	0	0	0	0	0	0	0	0	0	0	0	18	Fungi{superkingdom}(79);Ascomycota{phylum}(79);unidentified{class}(79);unidentified{order}(79);unidentified{family}(79);unidentified{genus}(79);unidentified{species}(79)	Fungi	Ascomycota	unidentified	unidentified	unidentified	unidentified	unidentified
ASV1472	0	58	0	0	0	0	0	0	0	0	0	0	0	0	0	39	0	97	Fungi{superkingdom}(75);Ascomycota{phylum}(75);Dothideomycetes{class}(75);Pleosporales{order}(75);Lophiostomataceae{family}(75);Lophiostoma{genus}(75);Lophiostoma_rosae{species}(75)	Fungi	Ascomycota	Dothideomycetes	Pleosporales	Lophiostomataceae	Lophiostoma	Lophiostoma_rosae
ASV1473	0	50	0	0	0	0	0	0	0	0	0	0	0	0	0	0	0	50	Fungi{superkingdom}(77);unidentified{phylum}(77);unidentified{class}(77);unidentified{order}(77);unidentified{family}(77);unidentified{genus}(77);unidentified{species}(77)	Fungi	unidentified	unidentified	unidentified	unidentified	unidentified	unidentified
ASV1480	0	0	30	6	0	0	0	0	0	0	0	0	0	0	0	0	0	36	Fungi{superkingdom}(73);Ascomycota{phylum}(73);Leotiomycetes{class}(73);Thelebolales{order}(73);Pseudeurotiaceae{family}(73);Pseudogymnoascus{genus}(73);Pseudogymnoascus_destructans{species}(73)	Fungi	Ascomycota	Leotiomycetes	Thelebolales	Pseudeurotiaceae	Pseudogymnoascus	Pseudogymnoascus_destructans
ASV1486	16	0	0	0	0	0	0	0	0	0	0	0	0	0	0	0	0	16	Fungi{superkingdom}(87);Ascomycota{phylum}(87);Sordariomycetes{class}(87);Unassigned{order}(0);Unassigned{family}(0);Unassigned{genus}(0);Unassigned{species}(0)	Fungi	Ascomycota	Sordariomycetes	Unassigned	Unassigned	Unassigned	Unassigned
ASV1487	0	0	95	0	0	0	0	0	0	0	0	0	0	0	0	0	0	95	Fungi{superkingdom}(70);Ascomycota{phylum}(70);Unassigned{class}(0);Unassigned{order}(0);Unassigned{family}(0);Unassigned{genus}(0);Unassigned{species}(0)	Fungi	Ascomycota	Unassigned	Unassigned	Unassigned	Unassigned	Unassigned
ASV1488	0	0	0	4	0	0	0	0	0	0	0	0	0	0	0	0	0	4	Fungi{superkingdom}(77);unidentified{phylum}(77);unidentified{class}(77);unidentified{order}(77);unidentified{family}(77);unidentified{genus}(77);unidentified{species}(77)	Fungi	unidentified	unidentified	unidentified	unidentified	unidentified	unidentified
ASV1493	0	0	0	0	0	0	0	0	0	0	0	0	0	95	0	0	0	95	Fungi{superkingdom}(79);unidentified{phylum}(79);unidentified{class}(79);unidentified{order}(79);unidentified{family}(79);unidentified{genus}(79);unidentified{species}(79)	Fungi	unidentified	unidentified	unidentified	unidentified	unidentified	unidentified
ASV1494	0	57	0	0	0	0	0	0	0	0	0	0	0	0	0	0	0	57	Fungi{superkingdom}(75);unidentified{phylum}(75);unidentified{class}(75);unidentified{order}(75);unidentified{family}(75);unidentified{genus}(75);unidentified{species}(75)	Fungi	unidentified	unidentified	unidentified	unidentified	unidentified	unidentified
ASV1498	0	0	0	0	0	0	0	0	0	0	0	0	0	0	13	46	0	59	Fungi{superkingdom}(61);Ascomycota{phylum}(61);Unassigned{class}(0);Unassigned{order}(0);Unassigned{family}(0);Unassigned{genus}(0);Unassigned{species}(0)	Fungi	Ascomycota	Unassigned	Unassigned	Unassigned	Unassigned	Unassigned
ASV1500	0	0	0	0	0	0	0	0	0	0	0	0	94	0	0	0	0	94	Fungi{superkingdom}(63);unidentified{phylum}(63);unidentified{class}(63);unidentified{order}(63);unidentified{family}(63);unidentified{genus}(63);unidentified{species}(63)	Fungi	unidentified	unidentified	unidentified	unidentified	unidentified	unidentified
ASV1501	0	0	0	0	0	0	0	0	0	0	0	0	0	0	94	0	0	94	Fungi{superkingdom}(67);unidentified{phylum}(67);unidentified{class}(67);unidentified{order}(67);unidentified{family}(67);unidentified{genus}(67);unidentified{species}(67)	Fungi	unidentified	unidentified	unidentified	unidentified	unidentified	unidentified
ASV1504	0	21	0	0	0	0	0	0	0	0	0	0	0	0	0	0	0	21	Fungi{superkingdom}(100);Ascomycota{phylum}(100);Eurotiomycetes{class}(100);Chaetothyriales{order}(100);Herpotrichiellaceae{family}(100);Exophiala{genus}(100);Exophiala_crusticola{species}(100)	Fungi	Ascomycota	Eurotiomycetes	Chaetothyriales	Herpotrichiellaceae	Exophiala	Exophiala_crusticola
ASV1505	0	14	0	0	0	0	0	0	0	0	0	0	0	0	0	0	0	14	Fungi{superkingdom}(96);Ascomycota{phylum}(96);Eurotiomycetes{class}(96);Chaetothyriales{order}(96);Herpotrichiellaceae{family}(96);Exophiala{genus}(96);Exophiala_radicis{species}(96)	Fungi	Ascomycota	Eurotiomycetes	Chaetothyriales	Herpotrichiellaceae	Exophiala	Exophiala_radicis
ASV1509	0	0	0	0	0	0	0	0	0	0	0	0	0	0	0	0	90	90	Fungi{superkingdom}(100);Unassigned{phylum}(0);Unassigned{class}(0);Unassigned{order}(0);Unassigned{family}(0);Unassigned{genus}(0);Unassigned{species}(0)	Fungi	Unassigned	Unassigned	Unassigned	Unassigned	Unassigned	Unassigned
ASV1511	0	0	0	0	0	0	0	0	0	62	0	0	0	0	0	0	0	62	Fungi{superkingdom}(73);unidentified{phylum}(73);unidentified{class}(73);unidentified{order}(73);unidentified{family}(73);unidentified{genus}(73);unidentified{species}(73)	Fungi	unidentified	unidentified	unidentified	unidentified	unidentified	unidentified
ASV1513	0	0	0	91	0	0	0	0	0	0	0	0	0	0	0	0	0	91	Fungi{superkingdom}(100);Unassigned{phylum}(0);Unassigned{class}(0);Unassigned{order}(0);Unassigned{family}(0);Unassigned{genus}(0);Unassigned{species}(0)	Fungi	Unassigned	Unassigned	Unassigned	Unassigned	Unassigned	Unassigned
ASV1515	0	0	0	0	0	0	0	0	0	9	0	0	0	0	0	0	0	9	Fungi{superkingdom}(60);Glomeromycota{phylum}(60);Glomeromycetes{class}(60);Glomerales{order}(60);Glomeraceae{family}(60);Glomus{genus}(60);Unassigned{species}(0)	Fungi	Glomeromycota	Glomeromycetes	Glomerales	Glomeraceae	Glomus	Unassigned
ASV1516	0	0	0	0	0	0	0	0	0	0	0	0	0	0	26	0	0	26	Fungi{superkingdom}(84);unidentified{phylum}(84);unidentified{class}(84);unidentified{order}(84);unidentified{family}(84);unidentified{genus}(84);unidentified{species}(84)	Fungi	unidentified	unidentified	unidentified	unidentified	unidentified	unidentified
ASV1521	0	0	0	0	0	0	0	0	0	55	0	0	0	0	0	0	0	55	Fungi{superkingdom}(94);unidentified{phylum}(94);unidentified{class}(94);unidentified{order}(94);unidentified{family}(94);unidentified{genus}(94);unidentified{species}(94)	Fungi	unidentified	unidentified	unidentified	unidentified	unidentified	unidentified
ASV1522	0	0	0	0	0	0	0	81	0	0	0	0	0	0	0	0	0	81	Fungi{superkingdom}(82);unidentified{phylum}(82);unidentified{class}(82);unidentified{order}(82);unidentified{family}(82);unidentified{genus}(82);unidentified{species}(82)	Fungi	unidentified	unidentified	unidentified	unidentified	unidentified	unidentified
ASV1523	0	0	0	0	0	0	91	0	0	0	0	0	0	0	0	0	0	91	Fungi{superkingdom}(61);Ascomycota{phylum}(61);Dothideomycetes{class}(61);Pleosporales{order}(61);unidentified{family}(61);unidentified{genus}(61);unidentified{species}(61)	Fungi	Ascomycota	Dothideomycetes	Pleosporales	unidentified	unidentified	unidentified
ASV1525	9	0	0	0	0	0	0	0	0	0	0	0	0	0	0	0	0	9	Fungi{superkingdom}(64);Basidiomycota{phylum}(64);Tremellomycetes{class}(64);Tremellales{order}(64);Bulleraceae{family}(64);Genolevuria{genus}(64);Genolevuria_armeniaca{species}(64)	Fungi	Basidiomycota	Tremellomycetes	Tremellales	Bulleraceae	Genolevuria	Genolevuria_armeniaca
ASV1526	0	90	0	0	0	0	0	0	0	0	0	0	0	0	0	0	0	90	Fungi{superkingdom}(100);Unassigned{phylum}(0);Unassigned{class}(0);Unassigned{order}(0);Unassigned{family}(0);Unassigned{genus}(0);Unassigned{species}(0)	Fungi	Unassigned	Unassigned	Unassigned	Unassigned	Unassigned	Unassigned
ASV1527	0	3	0	0	0	0	0	0	0	0	0	0	0	0	0	0	0	3	Fungi{superkingdom}(85);Ascomycota{phylum}(85);Dothideomycetes{class}(85);Pleosporales{order}(85);Pleosporaceae{family}(85);Comoclathris{genus}(85);unidentified{species}(85)	Fungi	Ascomycota	Dothideomycetes	Pleosporales	Pleosporaceae	Comoclathris	unidentified
ASV1534	0	89	0	0	0	0	0	0	0	0	0	0	0	0	0	0	0	89	Fungi{superkingdom}(84);Ascomycota{phylum}(84);Dothideomycetes{class}(84);Botryosphaeriales{order}(84);unidentified{family}(84);unidentified{genus}(84);unidentified{species}(84)	Fungi	Ascomycota	Dothideomycetes	Botryosphaeriales	unidentified	unidentified	unidentified
ASV1535	0	25	0	0	0	0	0	0	0	0	0	0	0	0	0	10	0	35	Fungi{superkingdom}(70);Ascomycota{phylum}(70);Eurotiomycetes{class}(70);Chaetothyriales{order}(70);Trichomeriaceae{family}(70);Bradymyces{genus}(70);unidentified{species}(70)	Fungi	Ascomycota	Eurotiomycetes	Chaetothyriales	Trichomeriaceae	Bradymyces	unidentified
ASV1536	0	0	0	0	89	0	0	0	0	0	0	0	0	0	0	0	0	89	Fungi{superkingdom}(79);unidentified{phylum}(79);unidentified{class}(79);unidentified{order}(79);unidentified{family}(79);unidentified{genus}(79);unidentified{species}(79)	Fungi	unidentified	unidentified	unidentified	unidentified	unidentified	unidentified
ASV1538	0	0	0	0	0	0	0	0	0	0	0	0	0	0	0	28	0	28	Fungi{superkingdom}(65);unidentified{phylum}(65);unidentified{class}(65);unidentified{order}(65);unidentified{family}(65);unidentified{genus}(65);unidentified{species}(65)	Fungi	unidentified	unidentified	unidentified	unidentified	unidentified	unidentified
ASV1542	0	0	0	0	0	0	0	0	0	0	0	89	0	0	0	0	0	89	Fungi{superkingdom}(94);unidentified{phylum}(94);unidentified{class}(94);unidentified{order}(94);unidentified{family}(94);unidentified{genus}(94);unidentified{species}(94)	Fungi	unidentified	unidentified	unidentified	unidentified	unidentified	unidentified
ASV1543	0	0	0	0	0	0	0	0	0	0	0	0	0	0	89	0	0	89	Fungi{superkingdom}(78);Ascomycota{phylum}(78);unidentified{class}(78);unidentified{order}(78);unidentified{family}(78);unidentified{genus}(78);unidentified{species}(78)	Fungi	Ascomycota	unidentified	unidentified	unidentified	unidentified	unidentified
ASV1544	0	0	0	6	0	0	9	0	0	0	0	44	5	0	0	0	0	64	Fungi{superkingdom}(98);unidentified{phylum}(98);unidentified{class}(98);unidentified{order}(98);unidentified{family}(98);unidentified{genus}(98);unidentified{species}(98)	Fungi	unidentified	unidentified	unidentified	unidentified	unidentified	unidentified
ASV1549	0	0	0	0	0	0	0	0	0	0	0	0	0	0	31	0	5	36	Fungi{superkingdom}(100);Unassigned{phylum}(0);Unassigned{class}(0);Unassigned{order}(0);Unassigned{family}(0);Unassigned{genus}(0);Unassigned{species}(0)	Fungi	Unassigned	Unassigned	Unassigned	Unassigned	Unassigned	Unassigned
ASV1554	5	0	0	0	0	0	0	0	0	0	0	0	0	0	0	0	0	5	Fungi{superkingdom}(99);Ascomycota{phylum}(99);Arthoniomycetes{class}(99);Lichenostigmatales{order}(99);Phaeococcomycetaceae{family}(99);Phaeococcomyces{genus}(99);unidentified{species}(99)	Fungi	Ascomycota	Arthoniomycetes	Lichenostigmatales	Phaeococcomycetaceae	Phaeococcomyces	unidentified
ASV1561	0	7	0	0	0	0	0	0	0	0	0	0	0	0	0	29	0	36	Fungi{superkingdom}(66);Ascomycota{phylum}(66);Sordariomycetes{class}(66);Xylariales{order}(66);Xylariales_fam_Incertae_sedis{family}(66);Phialemoniopsis{genus}(66);Phialemoniopsis_pluriloculosa{species}(66)	Fungi	Ascomycota	Sordariomycetes	Xylariales	Xylariales_fam_Incertae_sedis	Phialemoniopsis	Phialemoniopsis_pluriloculosa
ASV1568	0	78	0	0	0	0	0	0	0	0	0	0	0	0	0	0	0	78	Fungi{superkingdom}(82);Glomeromycota{phylum}(82);Glomeromycetes{class}(82);Glomerales{order}(82);Glomeraceae{family}(82);Glomus{genus}(82);Glomus_aggregatum{species}(82)	Fungi	Glomeromycota	Glomeromycetes	Glomerales	Glomeraceae	Glomus	Glomus_aggregatum
ASV1569	0	0	5	0	0	0	0	0	0	0	0	0	0	0	0	0	0	5	Fungi{superkingdom}(100);Glomeromycota{phylum}(100);Glomeromycetes{class}(100);Glomerales{order}(100);Glomeraceae{family}(100);Dominikia{genus}(100);Dominikia_iranica{species}(100)	Fungi	Glomeromycota	Glomeromycetes	Glomerales	Glomeraceae	Dominikia	Dominikia_iranica
ASV1572	0	0	0	0	0	0	0	0	0	0	0	73	0	0	0	0	0	73	Fungi{superkingdom}(71);Ascomycota{phylum}(71);Sordariomycetes{class}(71);Diaporthales{order}(71);Valsaceae{family}(71);Cytospora{genus}(71);Cytospora_plurivora{species}(71)	Fungi	Ascomycota	Sordariomycetes	Diaporthales	Valsaceae	Cytospora	Cytospora_plurivora
ASV1574	0	0	0	0	0	0	0	0	0	84	0	0	0	0	0	0	0	84	Fungi{superkingdom}(98);Ascomycota{phylum}(98);Sordariomycetes{class}(98);Xylariales{order}(98);Diatrypaceae{family}(98);Monosporascus{genus}(98);Monosporascus_cannonballus{species}(98)	Fungi	Ascomycota	Sordariomycetes	Xylariales	Diatrypaceae	Monosporascus	Monosporascus_cannonballus
ASV1576	0	0	0	0	0	0	0	0	0	0	0	0	0	2	0	0	0	2	Fungi{superkingdom}(100);Unassigned{phylum}(0);Unassigned{class}(0);Unassigned{order}(0);Unassigned{family}(0);Unassigned{genus}(0);Unassigned{species}(0)	Fungi	Unassigned	Unassigned	Unassigned	Unassigned	Unassigned	Unassigned
ASV1577	0	0	0	0	0	0	0	0	0	0	0	0	0	0	0	40	0	40	Fungi{superkingdom}(74);Chytridiomycota{phylum}(74);unidentified{class}(74);unidentified{order}(74);unidentified{family}(74);unidentified{genus}(74);unidentified{species}(74)	Fungi	Chytridiomycota	unidentified	unidentified	unidentified	unidentified	unidentified
ASV1581	0	0	0	0	0	0	0	0	0	83	0	0	0	0	0	0	0	83	Fungi{superkingdom}(100);Unassigned{phylum}(0);Unassigned{class}(0);Unassigned{order}(0);Unassigned{family}(0);Unassigned{genus}(0);Unassigned{species}(0)	Fungi	Unassigned	Unassigned	Unassigned	Unassigned	Unassigned	Unassigned
ASV1582	0	0	0	0	0	0	0	0	0	0	0	0	21	39	0	0	0	60	Fungi{superkingdom}(89);unidentified{phylum}(89);unidentified{class}(89);unidentified{order}(89);unidentified{family}(89);unidentified{genus}(89);unidentified{species}(89)	Fungi	unidentified	unidentified	unidentified	unidentified	unidentified	unidentified
ASV1583	15	0	0	0	0	0	0	0	0	0	0	0	0	0	0	0	0	15	Fungi{superkingdom}(100);Ascomycota{phylum}(100);Leotiomycetes{class}(100);Helotiales{order}(100);Helotiaceae{family}(100);Scytalidium{genus}(100);Scytalidium_lignicola{species}(100)	Fungi	Ascomycota	Leotiomycetes	Helotiales	Helotiaceae	Scytalidium	Scytalidium_lignicola
ASV1592	0	5	0	0	0	0	0	0	0	0	65	0	0	7	0	0	0	77	Fungi{superkingdom}(93);unidentified{phylum}(93);unidentified{class}(93);unidentified{order}(93);unidentified{family}(93);unidentified{genus}(93);unidentified{species}(93)	Fungi	unidentified	unidentified	unidentified	unidentified	unidentified	unidentified
ASV1593	0	0	0	0	0	0	0	0	10	0	0	0	0	0	0	0	0	10	Fungi{superkingdom}(82);Ascomycota{phylum}(82);Dothideomycetes{class}(82);Pleosporales{order}(82);Pleosporaceae{family}(82);Comoclathris{genus}(82);unidentified{species}(82)	Fungi	Ascomycota	Dothideomycetes	Pleosporales	Pleosporaceae	Comoclathris	unidentified
ASV1605	0	0	0	0	0	0	0	0	20	0	0	0	0	0	0	0	46	66	Fungi{superkingdom}(62);unidentified{phylum}(62);unidentified{class}(62);unidentified{order}(62);unidentified{family}(62);unidentified{genus}(62);unidentified{species}(62)	Fungi	unidentified	unidentified	unidentified	unidentified	unidentified	unidentified
ASV1608	0	0	0	11	0	0	0	0	0	0	0	0	0	0	0	0	0	11	Fungi{superkingdom}(74);Ascomycota{phylum}(74);Dothideomycetes{class}(74);Pleosporales{order}(74);Phaeosphaeriaceae{family}(74);Paraphoma{genus}(74);Paraphoma_chrysanthemicola{species}(74)	Fungi	Ascomycota	Dothideomycetes	Pleosporales	Phaeosphaeriaceae	Paraphoma	Paraphoma_chrysanthemicola
ASV1611	0	0	0	0	0	0	0	0	0	0	0	0	0	0	0	7	0	7	Fungi{superkingdom}(99);unidentified{phylum}(99);unidentified{class}(99);unidentified{order}(99);unidentified{family}(99);unidentified{genus}(99);unidentified{species}(99)	Fungi	unidentified	unidentified	unidentified	unidentified	unidentified	unidentified
ASV1618	0	0	0	0	0	0	0	0	0	79	0	0	0	0	0	0	0	79	Fungi{superkingdom}(95);Ascomycota{phylum}(95);Sordariomycetes{class}(95);Sordariales{order}(95);Chaetomiaceae{family}(95);Unassigned{genus}(0);Unassigned{species}(0)	Fungi	Ascomycota	Sordariomycetes	Sordariales	Chaetomiaceae	Unassigned	Unassigned
ASV1621	0	0	0	0	0	78	0	0	0	0	0	0	0	0	0	0	0	78	Fungi{superkingdom}(70);unidentified{phylum}(70);unidentified{class}(70);unidentified{order}(70);unidentified{family}(70);unidentified{genus}(70);unidentified{species}(70)	Fungi	unidentified	unidentified	unidentified	unidentified	unidentified	unidentified
ASV1622	0	0	0	0	0	0	0	0	0	0	9	0	0	0	0	0	0	9	Fungi{superkingdom}(100);Glomeromycota{phylum}(100);Glomeromycetes{class}(100);Glomerales{order}(100);Glomeraceae{family}(100);Unassigned{genus}(0);Unassigned{species}(0)	Fungi	Glomeromycota	Glomeromycetes	Glomerales	Glomeraceae	Unassigned	Unassigned
ASV1627	0	0	0	0	0	0	10	0	0	0	0	33	0	0	0	0	0	43	Fungi{superkingdom}(79);Ascomycota{phylum}(79);Eurotiomycetes{class}(79);Eurotiales{order}(79);Aspergillaceae{family}(79);Aspergillus{genus}(79);Aspergillus_gracilis{species}(79)	Fungi	Ascomycota	Eurotiomycetes	Eurotiales	Aspergillaceae	Aspergillus	Aspergillus_gracilis
ASV1636	0	0	0	0	0	0	0	0	0	0	0	67	0	0	0	0	0	67	Fungi{superkingdom}(68);unidentified{phylum}(68);unidentified{class}(68);unidentified{order}(68);unidentified{family}(68);unidentified{genus}(68);unidentified{species}(68)	Fungi	unidentified	unidentified	unidentified	unidentified	unidentified	unidentified
ASV1637	0	36	0	0	0	0	0	0	0	0	0	0	0	0	0	0	0	36	Fungi{superkingdom}(98);Ascomycota{phylum}(98);Sordariomycetes{class}(98);Hypocreales{order}(98);Hypocreales_fam_Incertae_sedis{family}(98);Acremonium{genus}(98);Acremonium_charticola{species}(98)	Fungi	Ascomycota	Sordariomycetes	Hypocreales	Hypocreales_fam_Incertae_sedis	Acremonium	Acremonium_charticola
ASV1642	0	0	0	0	0	0	0	0	0	0	0	0	0	26	20	0	0	46	Fungi{superkingdom}(99);unidentified{phylum}(99);unidentified{class}(99);unidentified{order}(99);unidentified{family}(99);unidentified{genus}(99);unidentified{species}(99)	Fungi	unidentified	unidentified	unidentified	unidentified	unidentified	unidentified
ASV1643	0	0	0	0	0	0	0	0	48	0	0	0	0	0	0	0	0	48	Fungi{superkingdom}(85);Ascomycota{phylum}(85);Dothideomycetes{class}(85);Pleosporales{order}(85);Unassigned{family}(0);Unassigned{genus}(0);Unassigned{species}(0)	Fungi	Ascomycota	Dothideomycetes	Pleosporales	Unassigned	Unassigned	Unassigned
ASV1649	31	0	0	0	0	0	0	0	0	0	0	0	0	0	0	0	0	31	Fungi{superkingdom}(66);unidentified{phylum}(66);unidentified{class}(66);unidentified{order}(66);unidentified{family}(66);unidentified{genus}(66);unidentified{species}(66)	Fungi	unidentified	unidentified	unidentified	unidentified	unidentified	unidentified
ASV1650	0	8	0	0	0	0	0	0	0	0	0	0	0	0	0	0	0	8	Fungi{superkingdom}(100);Ascomycota{phylum}(100);Eurotiomycetes{class}(100);Chaetothyriales{order}(100);Trichomeriaceae{family}(100);Knufia{genus}(100);Unassigned{species}(0)	Fungi	Ascomycota	Eurotiomycetes	Chaetothyriales	Trichomeriaceae	Knufia	Unassigned
ASV1655	0	0	0	0	0	0	70	0	0	0	0	0	0	0	0	0	0	70	Fungi{superkingdom}(100);Ascomycota{phylum}(100);Sordariomycetes{class}(100);Sordariales{order}(100);Lasiosphaeriaceae{family}(100);Podospora{genus}(100);Podospora_pyriformis{species}(100)	Fungi	Ascomycota	Sordariomycetes	Sordariales	Lasiosphaeriaceae	Podospora	Podospora_pyriformis
ASV1661	0	68	0	0	0	0	0	0	0	0	0	0	0	0	0	0	0	68	Fungi{superkingdom}(100);Unassigned{phylum}(0);Unassigned{class}(0);Unassigned{order}(0);Unassigned{family}(0);Unassigned{genus}(0);Unassigned{species}(0)	Fungi	Unassigned	Unassigned	Unassigned	Unassigned	Unassigned	Unassigned
ASV1662	0	3	0	0	0	0	0	0	0	0	0	0	0	0	0	0	0	3	Fungi{superkingdom}(73);unidentified{phylum}(73);unidentified{class}(73);unidentified{order}(73);unidentified{family}(73);unidentified{genus}(73);unidentified{species}(73)	Fungi	unidentified	unidentified	unidentified	unidentified	unidentified	unidentified
ASV1672	0	0	0	0	0	0	22	0	0	0	0	0	0	0	0	0	52	74	Fungi{superkingdom}(100);Basidiomycota{phylum}(100);Malasseziomycetes{class}(100);Malasseziales{order}(100);Malasseziaceae{family}(100);Malassezia{genus}(100);Malassezia_restricta{species}(100)	Fungi	Basidiomycota	Malasseziomycetes	Malasseziales	Malasseziaceae	Malassezia	Malassezia_restricta
ASV1674	13	0	0	0	0	5	0	0	0	0	0	0	0	0	0	0	0	18	Fungi{superkingdom}(89);unidentified{phylum}(89);unidentified{class}(89);unidentified{order}(89);unidentified{family}(89);unidentified{genus}(89);unidentified{species}(89)	Fungi	unidentified	unidentified	unidentified	unidentified	unidentified	unidentified
ASV1675	0	40	0	0	0	0	0	0	0	0	0	0	0	0	0	0	0	40	Fungi{superkingdom}(94);Ascomycota{phylum}(94);Eurotiomycetes{class}(94);Chaetothyriales{order}(94);unidentified{family}(94);unidentified{genus}(94);unidentified{species}(94)	Fungi	Ascomycota	Eurotiomycetes	Chaetothyriales	unidentified	unidentified	unidentified
ASV1676	0	16	0	0	0	0	0	0	0	0	0	0	0	0	0	0	0	16	Fungi{superkingdom}(89);unidentified{phylum}(89);unidentified{class}(89);unidentified{order}(89);unidentified{family}(89);unidentified{genus}(89);unidentified{species}(89)	Fungi	unidentified	unidentified	unidentified	unidentified	unidentified	unidentified
ASV1677	0	0	29	0	0	0	0	0	0	0	0	0	0	0	0	0	0	29	Fungi{superkingdom}(100);Unassigned{phylum}(0);Unassigned{class}(0);Unassigned{order}(0);Unassigned{family}(0);Unassigned{genus}(0);Unassigned{species}(0)	Fungi	Unassigned	Unassigned	Unassigned	Unassigned	Unassigned	Unassigned
ASV1678	0	0	0	0	0	73	0	0	0	0	0	0	0	0	0	0	0	73	Fungi{superkingdom}(96);Basidiomycota{phylum}(96);Agaricomycetes{class}(96);Agaricales{order}(96);Bolbitiaceae{family}(96);Conocybe{genus}(96);Conocybe_apala{species}(96)	Fungi	Basidiomycota	Agaricomycetes	Agaricales	Bolbitiaceae	Conocybe	Conocybe_apala
ASV1685	0	0	0	0	0	0	0	0	0	0	36	0	0	0	0	0	0	36	Fungi{superkingdom}(98);Ascomycota{phylum}(98);Lecanoromycetes{class}(98);Ostropales{order}(98);Gomphillaceae{family}(98);Corticifraga{genus}(98);Corticifraga_peltigerae{species}(98)	Fungi	Ascomycota	Lecanoromycetes	Ostropales	Gomphillaceae	Corticifraga	Corticifraga_peltigerae
ASV1687	0	0	0	0	0	0	0	0	0	8	0	0	0	0	0	0	0	8	Fungi{superkingdom}(93);Ascomycota{phylum}(93);Sordariomycetes{class}(93);Sordariales{order}(93);Chaetomiaceae{family}(93);Subramaniula{genus}(93);Unassigned{species}(0)	Fungi	Ascomycota	Sordariomycetes	Sordariales	Chaetomiaceae	Subramaniula	Unassigned
ASV1689	0	0	0	0	0	0	0	0	0	73	0	0	0	0	0	0	0	73	Fungi{superkingdom}(70);Ascomycota{phylum}(70);Sordariomycetes{class}(70);Hypocreales{order}(70);Stachybotryaceae{family}(70);Paramyrothecium{genus}(70);Paramyrothecium_humicola{species}(70)	Fungi	Ascomycota	Sordariomycetes	Hypocreales	Stachybotryaceae	Paramyrothecium	Paramyrothecium_humicola
ASV1693	0	0	0	0	0	0	0	0	0	0	0	0	0	0	0	73	0	73	Fungi{superkingdom}(100);Ascomycota{phylum}(100);Eurotiomycetes{class}(100);Chaetothyriales{order}(100);Trichomeriaceae{family}(100);Knufia{genus}(100);Knufia_peltigerae{species}(100)	Fungi	Ascomycota	Eurotiomycetes	Chaetothyriales	Trichomeriaceae	Knufia	Knufia_peltigerae
ASV1694	0	4	0	0	0	0	0	0	0	0	0	0	0	0	0	0	0	4	Fungi{superkingdom}(100);Unassigned{phylum}(0);Unassigned{class}(0);Unassigned{order}(0);Unassigned{family}(0);Unassigned{genus}(0);Unassigned{species}(0)	Fungi	Unassigned	Unassigned	Unassigned	Unassigned	Unassigned	Unassigned
ASV1699	0	0	0	0	0	0	0	0	0	22	0	0	0	0	0	0	0	22	Fungi{superkingdom}(67);Ascomycota{phylum}(67);Unassigned{class}(0);Unassigned{order}(0);Unassigned{family}(0);Unassigned{genus}(0);Unassigned{species}(0)	Fungi	Ascomycota	Unassigned	Unassigned	Unassigned	Unassigned	Unassigned
ASV1701	0	0	0	0	29	0	0	0	0	0	0	0	0	0	0	0	0	29	Fungi{superkingdom}(100);Ascomycota{phylum}(100);Dothideomycetes{class}(100);Pleosporales{order}(100);Didymellaceae{family}(100);Epicoccum{genus}(100);Epicoccum_nigrum{species}(100)	Fungi	Ascomycota	Dothideomycetes	Pleosporales	Didymellaceae	Epicoccum	Epicoccum_nigrum
ASV1718	0	0	0	11	0	0	0	0	0	0	0	0	0	0	0	0	0	11	Fungi{superkingdom}(100);Unassigned{phylum}(0);Unassigned{class}(0);Unassigned{order}(0);Unassigned{family}(0);Unassigned{genus}(0);Unassigned{species}(0)	Fungi	Unassigned	Unassigned	Unassigned	Unassigned	Unassigned	Unassigned
ASV1723	0	0	0	0	0	0	0	0	0	0	0	0	0	27	0	0	0	27	Fungi{superkingdom}(89);Ascomycota{phylum}(89);Dothideomycetes{class}(89);Pleosporales{order}(89);Pleosporaceae{family}(89);Bipolaris{genus}(89);Bipolaris_maydis{species}(89)	Fungi	Ascomycota	Dothideomycetes	Pleosporales	Pleosporaceae	Bipolaris	Bipolaris_maydis
ASV1731	0	0	0	0	0	0	0	0	0	0	0	0	0	0	0	69	0	69	Fungi{superkingdom}(97);unidentified{phylum}(97);unidentified{class}(97);unidentified{order}(97);unidentified{family}(97);unidentified{genus}(97);unidentified{species}(97)	Fungi	unidentified	unidentified	unidentified	unidentified	unidentified	unidentified
ASV1742	0	0	0	0	0	0	0	68	0	0	0	0	0	0	0	0	0	68	Fungi{superkingdom}(64);unidentified{phylum}(64);unidentified{class}(64);unidentified{order}(64);unidentified{family}(64);unidentified{genus}(64);unidentified{species}(64)	Fungi	unidentified	unidentified	unidentified	unidentified	unidentified	unidentified
ASV1743	0	0	0	0	0	0	0	0	0	68	0	0	0	0	0	0	0	68	Fungi{superkingdom}(100);Unassigned{phylum}(0);Unassigned{class}(0);Unassigned{order}(0);Unassigned{family}(0);Unassigned{genus}(0);Unassigned{species}(0)	Fungi	Unassigned	Unassigned	Unassigned	Unassigned	Unassigned	Unassigned
ASV1744	0	0	0	0	0	0	0	0	0	0	0	68	0	0	0	0	0	68	Fungi{superkingdom}(74);unidentified{phylum}(74);unidentified{class}(74);unidentified{order}(74);unidentified{family}(74);unidentified{genus}(74);unidentified{species}(74)	Fungi	unidentified	unidentified	unidentified	unidentified	unidentified	unidentified
ASV1756	0	0	0	0	0	0	0	0	0	0	0	18	0	0	0	0	0	18	Fungi{superkingdom}(100);Unassigned{phylum}(0);Unassigned{class}(0);Unassigned{order}(0);Unassigned{family}(0);Unassigned{genus}(0);Unassigned{species}(0)	Fungi	Unassigned	Unassigned	Unassigned	Unassigned	Unassigned	Unassigned
ASV1768	0	0	0	0	0	0	0	0	0	0	0	66	0	0	0	0	0	66	Fungi{superkingdom}(77);unidentified{phylum}(77);unidentified{class}(77);unidentified{order}(77);unidentified{family}(77);unidentified{genus}(77);unidentified{species}(77)	Fungi	unidentified	unidentified	unidentified	unidentified	unidentified	unidentified
ASV1773	0	0	0	0	0	0	0	0	0	0	0	0	0	0	36	0	0	36	Fungi{superkingdom}(79);Ascomycota{phylum}(79);Sordariomycetes{class}(79);Phomatosporales{order}(79);Phomatosporaceae{family}(79);Phomatospora{genus}(79);Phomatospora_biseriata{species}(79)	Fungi	Ascomycota	Sordariomycetes	Phomatosporales	Phomatosporaceae	Phomatospora	Phomatospora_biseriata
ASV1776	0	0	0	0	0	0	0	0	0	0	0	65	0	0	0	0	0	65	Fungi{superkingdom}(63);unidentified{phylum}(63);unidentified{class}(63);unidentified{order}(63);unidentified{family}(63);unidentified{genus}(63);unidentified{species}(63)	Fungi	unidentified	unidentified	unidentified	unidentified	unidentified	unidentified
ASV1777	0	0	0	0	0	0	0	0	0	0	0	53	0	0	0	0	0	53	Fungi{superkingdom}(99);unidentified{phylum}(99);unidentified{class}(99);unidentified{order}(99);unidentified{family}(99);unidentified{genus}(99);unidentified{species}(99)	Fungi	unidentified	unidentified	unidentified	unidentified	unidentified	unidentified
ASV1785	0	0	0	0	0	0	0	0	0	0	0	0	5	23	0	24	0	52	Fungi{superkingdom}(100);Unassigned{phylum}(0);Unassigned{class}(0);Unassigned{order}(0);Unassigned{family}(0);Unassigned{genus}(0);Unassigned{species}(0)	Fungi	Unassigned	Unassigned	Unassigned	Unassigned	Unassigned	Unassigned
ASV1788	0	22	0	0	0	0	0	0	0	0	0	0	0	0	0	0	0	22	Fungi{superkingdom}(87);Ascomycota{phylum}(87);Unassigned{class}(0);Unassigned{order}(0);Unassigned{family}(0);Unassigned{genus}(0);Unassigned{species}(0)	Fungi	Ascomycota	Unassigned	Unassigned	Unassigned	Unassigned	Unassigned
ASV1789	0	0	0	0	8	0	0	0	0	0	0	0	0	0	0	0	0	8	Fungi{superkingdom}(100);Unassigned{phylum}(0);Unassigned{class}(0);Unassigned{order}(0);Unassigned{family}(0);Unassigned{genus}(0);Unassigned{species}(0)	Fungi	Unassigned	Unassigned	Unassigned	Unassigned	Unassigned	Unassigned
ASV1796	0	0	0	0	0	0	14	0	0	0	0	0	0	0	0	0	0	14	Fungi{superkingdom}(75);unidentified{phylum}(75);unidentified{class}(75);unidentified{order}(75);unidentified{family}(75);unidentified{genus}(75);unidentified{species}(75)	Fungi	unidentified	unidentified	unidentified	unidentified	unidentified	unidentified
ASV1797	0	0	0	0	0	0	0	0	0	63	0	0	0	0	0	0	0	63	Fungi{superkingdom}(77);unidentified{phylum}(77);unidentified{class}(77);unidentified{order}(77);unidentified{family}(77);unidentified{genus}(77);unidentified{species}(77)	Fungi	unidentified	unidentified	unidentified	unidentified	unidentified	unidentified
ASV1798	0	0	0	0	0	0	0	0	0	63	0	0	0	0	0	0	0	63	Fungi{superkingdom}(100);Unassigned{phylum}(0);Unassigned{class}(0);Unassigned{order}(0);Unassigned{family}(0);Unassigned{genus}(0);Unassigned{species}(0)	Fungi	Unassigned	Unassigned	Unassigned	Unassigned	Unassigned	Unassigned
ASV1807	0	0	0	0	0	0	0	0	0	0	0	62	0	0	0	0	0	62	Fungi{superkingdom}(100);Unassigned{phylum}(0);Unassigned{class}(0);Unassigned{order}(0);Unassigned{family}(0);Unassigned{genus}(0);Unassigned{species}(0)	Fungi	Unassigned	Unassigned	Unassigned	Unassigned	Unassigned	Unassigned
ASV1808	0	61	0	0	0	0	0	0	0	0	0	0	0	0	0	0	0	61	Fungi{superkingdom}(100);Unassigned{phylum}(0);Unassigned{class}(0);Unassigned{order}(0);Unassigned{family}(0);Unassigned{genus}(0);Unassigned{species}(0)	Fungi	Unassigned	Unassigned	Unassigned	Unassigned	Unassigned	Unassigned
ASV1809	0	61	0	0	0	0	0	0	0	0	0	0	0	0	0	0	0	61	Fungi{superkingdom}(100);Unassigned{phylum}(0);Unassigned{class}(0);Unassigned{order}(0);Unassigned{family}(0);Unassigned{genus}(0);Unassigned{species}(0)	Fungi	Unassigned	Unassigned	Unassigned	Unassigned	Unassigned	Unassigned
ASV1810	0	0	0	0	10	0	0	0	0	0	0	0	0	0	0	0	0	10	Fungi{superkingdom}(77);Ascomycota{phylum}(77);Eurotiomycetes{class}(77);Chaetothyriales{order}(77);Trichomeriaceae{family}(77);Arthrocladium{genus}(77);Unassigned{species}(0)	Fungi	Ascomycota	Eurotiomycetes	Chaetothyriales	Trichomeriaceae	Arthrocladium	Unassigned
ASV1815	0	0	0	0	0	0	0	0	0	0	0	58	0	0	0	0	0	58	Fungi{superkingdom}(68);unidentified{phylum}(68);unidentified{class}(68);unidentified{order}(68);unidentified{family}(68);unidentified{genus}(68);unidentified{species}(68)	Fungi	unidentified	unidentified	unidentified	unidentified	unidentified	unidentified
ASV1821	0	0	0	0	0	0	0	61	0	0	0	0	0	0	0	0	0	61	Fungi{superkingdom}(100);Unassigned{phylum}(0);Unassigned{class}(0);Unassigned{order}(0);Unassigned{family}(0);Unassigned{genus}(0);Unassigned{species}(0)	Fungi	Unassigned	Unassigned	Unassigned	Unassigned	Unassigned	Unassigned
ASV1823	60	0	0	0	0	0	0	0	0	0	0	0	0	0	0	0	0	60	Fungi{superkingdom}(100);Unassigned{phylum}(0);Unassigned{class}(0);Unassigned{order}(0);Unassigned{family}(0);Unassigned{genus}(0);Unassigned{species}(0)	Fungi	Unassigned	Unassigned	Unassigned	Unassigned	Unassigned	Unassigned
ASV1824	3	0	0	0	0	0	0	0	0	0	0	57	0	0	0	0	0	60	Fungi{superkingdom}(100);Unassigned{phylum}(0);Unassigned{class}(0);Unassigned{order}(0);Unassigned{family}(0);Unassigned{genus}(0);Unassigned{species}(0)	Fungi	Unassigned	Unassigned	Unassigned	Unassigned	Unassigned	Unassigned
ASV1825	0	60	0	0	0	0	0	0	0	0	0	0	0	0	0	0	0	60	Fungi{superkingdom}(94);Ascomycota{phylum}(94);Eurotiomycetes{class}(94);Chaetothyriales{order}(94);unidentified{family}(94);unidentified{genus}(94);unidentified{species}(94)	Fungi	Ascomycota	Eurotiomycetes	Chaetothyriales	unidentified	unidentified	unidentified
ASV1834	0	0	0	0	0	0	0	0	0	60	0	0	0	0	0	0	0	60	Fungi{superkingdom}(100);Unassigned{phylum}(0);Unassigned{class}(0);Unassigned{order}(0);Unassigned{family}(0);Unassigned{genus}(0);Unassigned{species}(0)	Fungi	Unassigned	Unassigned	Unassigned	Unassigned	Unassigned	Unassigned
ASV1835	0	0	0	0	0	0	0	0	0	0	0	60	0	0	0	0	0	60	Fungi{superkingdom}(81);Basidiomycota{phylum}(81);Agaricomycetes{class}(81);Auriculariales{order}(81);Unassigned{family}(0);Unassigned{genus}(0);Unassigned{species}(0)	Fungi	Basidiomycota	Agaricomycetes	Auriculariales	Unassigned	Unassigned	Unassigned
ASV1837	0	59	0	0	0	0	0	0	0	0	0	0	0	0	0	0	0	59	Fungi{superkingdom}(97);unidentified{phylum}(97);unidentified{class}(97);unidentified{order}(97);unidentified{family}(97);unidentified{genus}(97);unidentified{species}(97)	Fungi	unidentified	unidentified	unidentified	unidentified	unidentified	unidentified
ASV1838	0	59	0	0	0	0	0	0	0	0	0	0	0	0	0	0	0	59	Fungi{superkingdom}(69);unidentified{phylum}(69);unidentified{class}(69);unidentified{order}(69);unidentified{family}(69);unidentified{genus}(69);unidentified{species}(69)	Fungi	unidentified	unidentified	unidentified	unidentified	unidentified	unidentified
ASV1842	0	0	0	0	0	0	0	25	0	0	0	0	0	0	0	0	0	25	Fungi{superkingdom}(98);Ascomycota{phylum}(98);Saccharomycetes{class}(98);Saccharomycetales{order}(98);Saccharomycetales_fam_Incertae_sedis{family}(98);Candida{genus}(98);Candida_tropicalis{species}(98)	Fungi	Ascomycota	Saccharomycetes	Saccharomycetales	Saccharomycetales_fam_Incertae_sedis	Candida	Candida_tropicalis
ASV1844	0	0	0	0	0	0	0	0	0	0	0	4	0	0	0	0	0	4	Fungi{superkingdom}(99);unidentified{phylum}(99);unidentified{class}(99);unidentified{order}(99);unidentified{family}(99);unidentified{genus}(99);unidentified{species}(99)	Fungi	unidentified	unidentified	unidentified	unidentified	unidentified	unidentified
ASV1846	0	0	0	0	0	0	0	17	0	0	0	0	0	0	0	0	0	17	Fungi{superkingdom}(68);unidentified{phylum}(68);unidentified{class}(68);unidentified{order}(68);unidentified{family}(68);unidentified{genus}(68);unidentified{species}(68)	Fungi	unidentified	unidentified	unidentified	unidentified	unidentified	unidentified
ASV1847	0	58	0	0	0	0	0	0	0	0	0	0	0	0	0	0	0	58	Fungi{superkingdom}(87);unidentified{phylum}(87);unidentified{class}(87);unidentified{order}(87);unidentified{family}(87);unidentified{genus}(87);unidentified{species}(87)	Fungi	unidentified	unidentified	unidentified	unidentified	unidentified	unidentified
ASV1848	0	0	0	15	0	0	0	0	0	0	0	0	0	0	0	0	0	15	Fungi{superkingdom}(61);Chytridiomycota{phylum}(61);unidentified{class}(61);unidentified{order}(61);unidentified{family}(61);unidentified{genus}(61);unidentified{species}(61)	Fungi	Chytridiomycota	unidentified	unidentified	unidentified	unidentified	unidentified
ASV1849	0	0	0	0	0	35	0	0	0	0	0	0	0	0	0	0	0	35	Fungi{superkingdom}(100);Ascomycota{phylum}(100);Eurotiomycetes{class}(100);Eurotiales{order}(100);Aspergillaceae{family}(100);Aspergillus{genus}(100);Unassigned{species}(0)	Fungi	Ascomycota	Eurotiomycetes	Eurotiales	Aspergillaceae	Aspergillus	Unassigned
ASV1857	0	0	0	0	0	0	0	0	0	0	0	0	23	0	0	0	0	23	Fungi{superkingdom}(61);unidentified{phylum}(61);unidentified{class}(61);unidentified{order}(61);unidentified{family}(61);unidentified{genus}(61);unidentified{species}(61)	Fungi	unidentified	unidentified	unidentified	unidentified	unidentified	unidentified
ASV1858	0	0	0	0	0	0	0	0	0	0	0	58	0	0	0	0	0	58	Fungi{superkingdom}(100);Basidiomycota{phylum}(100);Agaricomycetes{class}(100);Auriculariales{order}(100);Auriculariaceae{family}(100);Auricularia{genus}(100);Auricularia_villosula{species}(100)	Fungi	Basidiomycota	Agaricomycetes	Auriculariales	Auriculariaceae	Auricularia	Auricularia_villosula
ASV1859	0	0	0	0	0	0	0	0	0	0	0	58	0	0	0	0	0	58	Fungi{superkingdom}(100);Ascomycota{phylum}(100);Sordariomycetes{class}(100);Sordariales{order}(100);Chaetomiaceae{family}(100);Thielavia{genus}(100);Thielavia_arenaria{species}(100)	Fungi	Ascomycota	Sordariomycetes	Sordariales	Chaetomiaceae	Thielavia	Thielavia_arenaria
ASV1863	0	0	0	0	0	0	36	0	0	0	0	0	0	0	0	0	0	36	Fungi{superkingdom}(86);Ascomycota{phylum}(86);Orbiliomycetes{class}(86);Orbiliales{order}(86);Orbiliaceae{family}(86);Orbilia{genus}(86);unidentified{species}(86)	Fungi	Ascomycota	Orbiliomycetes	Orbiliales	Orbiliaceae	Orbilia	unidentified
ASV1872	8	0	0	0	0	0	0	0	0	0	0	0	0	0	0	0	0	8	Fungi{superkingdom}(98);Ascomycota{phylum}(98);Sordariomycetes{class}(98);Hypocreales{order}(98);Bionectriaceae{family}(98);Hydropisphaera{genus}(98);unidentified{species}(98)	Fungi	Ascomycota	Sordariomycetes	Hypocreales	Bionectriaceae	Hydropisphaera	unidentified
ASV1873	0	56	0	0	0	0	0	0	0	0	0	0	0	0	0	0	0	56	Fungi{superkingdom}(86);unidentified{phylum}(86);unidentified{class}(86);unidentified{order}(86);unidentified{family}(86);unidentified{genus}(86);unidentified{species}(86)	Fungi	unidentified	unidentified	unidentified	unidentified	unidentified	unidentified
ASV1874	0	0	0	0	12	44	0	0	0	0	0	0	0	0	0	0	0	56	Fungi{superkingdom}(84);Ascomycota{phylum}(84);Eurotiomycetes{class}(84);Eurotiales{order}(84);Trichocomaceae{family}(84);Talaromyces{genus}(84);Talaromyces_aculeatus{species}(84)	Fungi	Ascomycota	Eurotiomycetes	Eurotiales	Trichocomaceae	Talaromyces	Talaromyces_aculeatus
ASV1882	0	0	0	0	0	0	0	0	56	0	0	0	0	0	0	0	0	56	Fungi{superkingdom}(100);Unassigned{phylum}(0);Unassigned{class}(0);Unassigned{order}(0);Unassigned{family}(0);Unassigned{genus}(0);Unassigned{species}(0)	Fungi	Unassigned	Unassigned	Unassigned	Unassigned	Unassigned	Unassigned
ASV1883	0	0	0	0	0	0	0	0	0	56	0	0	0	0	0	0	0	56	Fungi{superkingdom}(96);unidentified{phylum}(96);unidentified{class}(96);unidentified{order}(96);unidentified{family}(96);unidentified{genus}(96);unidentified{species}(96)	Fungi	unidentified	unidentified	unidentified	unidentified	unidentified	unidentified
ASV1885	0	6	0	0	0	0	0	0	0	0	0	0	0	0	0	0	0	6	Fungi{superkingdom}(90);unidentified{phylum}(90);unidentified{class}(90);unidentified{order}(90);unidentified{family}(90);unidentified{genus}(90);unidentified{species}(90)	Fungi	unidentified	unidentified	unidentified	unidentified	unidentified	unidentified
ASV1904	0	0	0	26	0	0	0	0	0	0	0	0	0	0	0	0	0	26	Fungi{superkingdom}(99);Basidiomycota{phylum}(99);Agaricomycetes{class}(99);Agaricales{order}(99);Strophariaceae{family}(99);Tubaria{genus}(99);Tubaria_minima{species}(99)	Fungi	Basidiomycota	Agaricomycetes	Agaricales	Strophariaceae	Tubaria	Tubaria_minima
ASV1916	0	53	0	0	0	0	0	0	0	0	0	0	0	0	0	0	0	53	Fungi{superkingdom}(67);Ascomycota{phylum}(67);Eurotiomycetes{class}(67);Chaetothyriales{order}(67);Trichomeriaceae{family}(67);Knufia{genus}(67);Unassigned{species}(0)	Fungi	Ascomycota	Eurotiomycetes	Chaetothyriales	Trichomeriaceae	Knufia	Unassigned
ASV1917	0	0	0	0	0	2	0	0	0	0	0	0	0	0	19	0	0	21	Fungi{superkingdom}(73);Ascomycota{phylum}(73);Sordariomycetes{class}(73);Unassigned{order}(0);Unassigned{family}(0);Unassigned{genus}(0);Unassigned{species}(0)	Fungi	Ascomycota	Sordariomycetes	Unassigned	Unassigned	Unassigned	Unassigned
ASV1925	0	0	0	0	0	0	0	0	0	30	0	0	0	0	0	0	0	30	Fungi{superkingdom}(73);Ascomycota{phylum}(73);Dothideomycetes{class}(73);Pleosporales{order}(73);unidentified{family}(73);unidentified{genus}(73);unidentified{species}(73)	Fungi	Ascomycota	Dothideomycetes	Pleosporales	unidentified	unidentified	unidentified
ASV1927	0	0	0	0	0	0	0	0	0	0	53	0	0	0	0	0	0	53	Fungi{superkingdom}(100);Ascomycota{phylum}(100);Eurotiomycetes{class}(100);Onygenales{order}(100);Onygenales_fam_Incertae_sedis{family}(100);Chrysosporium{genus}(100);Chrysosporium_lobatum{species}(100)	Fungi	Ascomycota	Eurotiomycetes	Onygenales	Onygenales_fam_Incertae_sedis	Chrysosporium	Chrysosporium_lobatum
ASV1931	0	52	0	0	0	0	0	0	0	0	0	0	0	0	0	0	0	52	Fungi{superkingdom}(66);unidentified{phylum}(66);unidentified{class}(66);unidentified{order}(66);unidentified{family}(66);unidentified{genus}(66);unidentified{species}(66)	Fungi	unidentified	unidentified	unidentified	unidentified	unidentified	unidentified
ASV1932	0	7	0	0	0	0	0	0	0	0	0	0	0	0	0	0	0	7	Fungi{superkingdom}(98);Basidiomycota{phylum}(98);Tremellomycetes{class}(98);Filobasidiales{order}(98);Filobasidiaceae{family}(98);Filobasidium{genus}(98);Filobasidium_globisporum{species}(98)	Fungi	Basidiomycota	Tremellomycetes	Filobasidiales	Filobasidiaceae	Filobasidium	Filobasidium_globisporum
ASV1933	0	0	13	0	0	0	0	0	0	0	0	0	0	0	0	0	0	13	Fungi{superkingdom}(97);Ascomycota{phylum}(97);Sordariomycetes{class}(97);Xylariales{order}(97);Diatrypaceae{family}(97);Monosporascus{genus}(97);unidentified{species}(97)	Fungi	Ascomycota	Sordariomycetes	Xylariales	Diatrypaceae	Monosporascus	unidentified
ASV1934	0	0	0	0	0	0	0	0	0	0	0	0	0	27	0	0	0	27	Fungi{superkingdom}(100);Unassigned{phylum}(0);Unassigned{class}(0);Unassigned{order}(0);Unassigned{family}(0);Unassigned{genus}(0);Unassigned{species}(0)	Fungi	Unassigned	Unassigned	Unassigned	Unassigned	Unassigned	Unassigned
ASV1943	0	0	0	0	0	0	0	0	0	0	0	0	0	52	0	0	0	52	Fungi{superkingdom}(60);unidentified{phylum}(60);unidentified{class}(60);unidentified{order}(60);unidentified{family}(60);unidentified{genus}(60);unidentified{species}(60)	Fungi	unidentified	unidentified	unidentified	unidentified	unidentified	unidentified
ASV1944	15	0	0	0	0	0	0	0	0	0	0	0	0	0	0	0	0	15	Fungi{superkingdom}(70);Ascomycota{phylum}(70);Sordariomycetes{class}(70);Sordariales{order}(70);unidentified{family}(70);unidentified{genus}(70);unidentified{species}(70)	Fungi	Ascomycota	Sordariomycetes	Sordariales	unidentified	unidentified	unidentified
ASV1945	0	51	0	0	0	0	0	0	0	0	0	0	0	0	0	0	0	51	Fungi{superkingdom}(62);unidentified{phylum}(62);unidentified{class}(62);unidentified{order}(62);unidentified{family}(62);unidentified{genus}(62);unidentified{species}(62)	Fungi	unidentified	unidentified	unidentified	unidentified	unidentified	unidentified
ASV1946	0	4	0	0	0	0	0	0	0	0	0	0	0	0	0	0	0	4	Fungi{superkingdom}(98);unidentified{phylum}(98);unidentified{class}(98);unidentified{order}(98);unidentified{family}(98);unidentified{genus}(98);unidentified{species}(98)	Fungi	unidentified	unidentified	unidentified	unidentified	unidentified	unidentified
ASV1947	0	0	31	0	0	0	0	0	0	0	0	0	0	0	0	0	0	31	Fungi{superkingdom}(94);unidentified{phylum}(94);unidentified{class}(94);unidentified{order}(94);unidentified{family}(94);unidentified{genus}(94);unidentified{species}(94)	Fungi	unidentified	unidentified	unidentified	unidentified	unidentified	unidentified
ASV1955	0	0	0	0	0	0	0	0	0	0	51	0	0	0	0	0	0	51	Fungi{superkingdom}(100);Unassigned{phylum}(0);Unassigned{class}(0);Unassigned{order}(0);Unassigned{family}(0);Unassigned{genus}(0);Unassigned{species}(0)	Fungi	Unassigned	Unassigned	Unassigned	Unassigned	Unassigned	Unassigned
ASV1960	4	10	0	0	0	0	0	0	0	0	0	0	0	0	0	0	0	14	Fungi{superkingdom}(100);Unassigned{phylum}(0);Unassigned{class}(0);Unassigned{order}(0);Unassigned{family}(0);Unassigned{genus}(0);Unassigned{species}(0)	Fungi	Unassigned	Unassigned	Unassigned	Unassigned	Unassigned	Unassigned
ASV1970	0	0	0	0	0	0	0	0	0	0	0	14	0	0	0	14	0	28	Fungi{superkingdom}(93);Ascomycota{phylum}(93);Sordariomycetes{class}(93);Sordariales{order}(93);Lasiosphaeriaceae{family}(93);Echria{genus}(93);unidentified{species}(93)	Fungi	Ascomycota	Sordariomycetes	Sordariales	Lasiosphaeriaceae	Echria	unidentified
ASV1979	0	0	0	0	0	0	0	0	0	0	0	0	0	0	24	0	0	24	Fungi{superkingdom}(92);unidentified{phylum}(92);unidentified{class}(92);unidentified{order}(92);unidentified{family}(92);unidentified{genus}(92);unidentified{species}(92)	Fungi	unidentified	unidentified	unidentified	unidentified	unidentified	unidentified
ASV1985	0	0	0	0	0	0	0	0	0	0	0	0	0	0	50	0	0	50	Fungi{superkingdom}(100);Unassigned{phylum}(0);Unassigned{class}(0);Unassigned{order}(0);Unassigned{family}(0);Unassigned{genus}(0);Unassigned{species}(0)	Fungi	Unassigned	Unassigned	Unassigned	Unassigned	Unassigned	Unassigned
ASV1986	0	49	0	0	0	0	0	0	0	0	0	0	0	0	0	0	0	49	Fungi{superkingdom}(74);Ascomycota{phylum}(74);unidentified{class}(74);unidentified{order}(74);unidentified{family}(74);unidentified{genus}(74);unidentified{species}(74)	Fungi	Ascomycota	unidentified	unidentified	unidentified	unidentified	unidentified
ASV1987	0	21	0	0	0	0	0	0	0	0	0	0	0	0	0	0	0	21	Fungi{superkingdom}(98);unidentified{phylum}(98);unidentified{class}(98);unidentified{order}(98);unidentified{family}(98);unidentified{genus}(98);unidentified{species}(98)	Fungi	unidentified	unidentified	unidentified	unidentified	unidentified	unidentified
ASV1988	0	0	0	0	11	0	0	0	0	0	0	38	0	0	0	0	0	49	Fungi{superkingdom}(100);Unassigned{phylum}(0);Unassigned{class}(0);Unassigned{order}(0);Unassigned{family}(0);Unassigned{genus}(0);Unassigned{species}(0)	Fungi	Unassigned	Unassigned	Unassigned	Unassigned	Unassigned	Unassigned
ASV2004	0	0	0	0	0	0	0	0	0	0	0	0	0	49	0	0	0	49	Fungi{superkingdom}(70);Basidiomycota{phylum}(70);Agaricomycetes{class}(70);unidentified{order}(70);unidentified{family}(70);unidentified{genus}(70);unidentified{species}(70)	Fungi	Basidiomycota	Agaricomycetes	unidentified	unidentified	unidentified	unidentified
ASV2018	0	0	0	0	0	0	0	0	0	0	0	0	0	0	0	0	10	10	Fungi{superkingdom}(83);Ascomycota{phylum}(83);Eurotiomycetes{class}(83);Eurotiales{order}(83);Aspergillaceae{family}(83);Penicillium{genus}(83);Penicillium_brasilianum{species}(83)	Fungi	Ascomycota	Eurotiomycetes	Eurotiales	Aspergillaceae	Penicillium	Penicillium_brasilianum
ASV2020	0	0	0	0	0	0	0	0	0	0	0	0	0	48	0	0	0	48	Fungi{superkingdom}(76);Basidiomycota{phylum}(76);Agaricomycetes{class}(76);unidentified{order}(76);unidentified{family}(76);unidentified{genus}(76);unidentified{species}(76)	Fungi	Basidiomycota	Agaricomycetes	unidentified	unidentified	unidentified	unidentified
ASV2021	8	0	0	0	0	0	0	0	0	0	0	0	0	0	0	0	0	8	Fungi{superkingdom}(97);Ascomycota{phylum}(97);Sordariomycetes{class}(97);Unassigned{order}(0);Unassigned{family}(0);Unassigned{genus}(0);Unassigned{species}(0)	Fungi	Ascomycota	Sordariomycetes	Unassigned	Unassigned	Unassigned	Unassigned
ASV2022	0	0	10	0	0	0	0	0	0	0	0	0	0	0	0	0	0	10	Fungi{superkingdom}(74);unidentified{phylum}(74);unidentified{class}(74);unidentified{order}(74);unidentified{family}(74);unidentified{genus}(74);unidentified{species}(74)	Fungi	unidentified	unidentified	unidentified	unidentified	unidentified	unidentified
ASV2023	0	0	0	0	26	0	0	0	0	0	0	0	0	0	0	0	0	26	Fungi{superkingdom}(96);unidentified{phylum}(96);unidentified{class}(96);unidentified{order}(96);unidentified{family}(96);unidentified{genus}(96);unidentified{species}(96)	Fungi	unidentified	unidentified	unidentified	unidentified	unidentified	unidentified
ASV2040	0	0	0	0	0	0	0	0	0	47	0	0	0	0	0	0	0	47	Fungi{superkingdom}(63);Ascomycota{phylum}(63);Sordariomycetes{class}(63);Sordariales{order}(63);unidentified{family}(63);unidentified{genus}(63);unidentified{species}(63)	Fungi	Ascomycota	Sordariomycetes	Sordariales	unidentified	unidentified	unidentified
ASV2041	0	0	0	0	0	0	0	0	0	11	0	0	0	36	0	0	0	47	Fungi{superkingdom}(100);Unassigned{phylum}(0);Unassigned{class}(0);Unassigned{order}(0);Unassigned{family}(0);Unassigned{genus}(0);Unassigned{species}(0)	Fungi	Unassigned	Unassigned	Unassigned	Unassigned	Unassigned	Unassigned
ASV2043	0	46	0	0	0	0	0	0	0	0	0	0	0	0	0	0	0	46	Fungi{superkingdom}(96);Ascomycota{phylum}(96);Sordariomycetes{class}(96);Hypocreales{order}(96);Cordycipitaceae{family}(96);Parengyodontium{genus}(96);Parengyodontium_album{species}(96)	Fungi	Ascomycota	Sordariomycetes	Hypocreales	Cordycipitaceae	Parengyodontium	Parengyodontium_album
ASV2044	0	46	0	0	0	0	0	0	0	0	0	0	0	0	0	0	0	46	Fungi{superkingdom}(98);Ascomycota{phylum}(98);Leotiomycetes{class}(98);Helotiales{order}(98);Helotiales_fam_Incertae_sedis{family}(98);Xylogone{genus}(98);unidentified{species}(98)	Fungi	Ascomycota	Leotiomycetes	Helotiales	Helotiales_fam_Incertae_sedis	Xylogone	unidentified
ASV2057	0	0	0	0	0	0	0	46	0	0	0	0	0	0	0	0	0	46	Fungi{superkingdom}(100);Unassigned{phylum}(0);Unassigned{class}(0);Unassigned{order}(0);Unassigned{family}(0);Unassigned{genus}(0);Unassigned{species}(0)	Fungi	Unassigned	Unassigned	Unassigned	Unassigned	Unassigned	Unassigned
ASV2059	0	0	0	0	0	0	0	0	0	0	0	46	0	0	0	0	0	46	Fungi{superkingdom}(62);Basidiomycota{phylum}(62);Agaricomycetes{class}(62);Unassigned{order}(0);Unassigned{family}(0);Unassigned{genus}(0);Unassigned{species}(0)	Fungi	Basidiomycota	Agaricomycetes	Unassigned	Unassigned	Unassigned	Unassigned
ASV2060	0	0	0	0	0	0	0	0	0	0	0	41	0	0	0	0	0	41	Fungi{superkingdom}(71);unidentified{phylum}(71);unidentified{class}(71);unidentified{order}(71);unidentified{family}(71);unidentified{genus}(71);unidentified{species}(71)	Fungi	unidentified	unidentified	unidentified	unidentified	unidentified	unidentified
ASV2061	0	0	0	0	0	0	0	0	0	0	0	27	0	0	19	0	0	46	Fungi{superkingdom}(68);unidentified{phylum}(68);unidentified{class}(68);unidentified{order}(68);unidentified{family}(68);unidentified{genus}(68);unidentified{species}(68)	Fungi	unidentified	unidentified	unidentified	unidentified	unidentified	unidentified
ASV2065	0	14	0	0	0	0	0	0	0	0	0	6	0	0	0	0	0	20	Fungi{superkingdom}(68);unidentified{phylum}(68);unidentified{class}(68);unidentified{order}(68);unidentified{family}(68);unidentified{genus}(68);unidentified{species}(68)	Fungi	unidentified	unidentified	unidentified	unidentified	unidentified	unidentified
ASV2066	0	6	0	0	0	0	0	0	0	0	0	0	0	0	0	0	0	6	Fungi{superkingdom}(67);Ascomycota{phylum}(67);Dothideomycetes{class}(67);Capnodiales{order}(67);unidentified{family}(67);unidentified{genus}(67);unidentified{species}(67)	Fungi	Ascomycota	Dothideomycetes	Capnodiales	unidentified	unidentified	unidentified
ASV2067	0	0	0	0	4	0	0	0	0	0	0	0	0	0	0	0	0	4	Fungi{superkingdom}(82);Ascomycota{phylum}(82);Leotiomycetes{class}(82);Helotiales{order}(82);unidentified{family}(82);unidentified{genus}(82);unidentified{species}(82)	Fungi	Ascomycota	Leotiomycetes	Helotiales	unidentified	unidentified	unidentified
ASV2072	0	0	0	0	0	0	0	0	0	0	42	0	0	0	0	0	0	42	Fungi{superkingdom}(79);unidentified{phylum}(79);unidentified{class}(79);unidentified{order}(79);unidentified{family}(79);unidentified{genus}(79);unidentified{species}(79)	Fungi	unidentified	unidentified	unidentified	unidentified	unidentified	unidentified
ASV2079	0	0	0	0	0	0	0	0	0	0	0	0	0	0	0	45	0	45	Fungi{superkingdom}(79);unidentified{phylum}(79);unidentified{class}(79);unidentified{order}(79);unidentified{family}(79);unidentified{genus}(79);unidentified{species}(79)	Fungi	unidentified	unidentified	unidentified	unidentified	unidentified	unidentified
ASV2080	0	44	0	0	0	0	0	0	0	0	0	0	0	0	0	0	0	44	Fungi{superkingdom}(100);Zoopagomycota{phylum}(100);Zoopagomycetes{class}(100);Zoopagales{order}(100);Piptocephalidaceae{family}(100);Syncephalis{genus}(100);unidentified{species}(100)	Fungi	Zoopagomycota	Zoopagomycetes	Zoopagales	Piptocephalidaceae	Syncephalis	unidentified
ASV2081	0	13	0	0	0	0	0	0	0	0	0	0	0	0	0	0	0	13	Fungi{superkingdom}(100);Basidiomycota{phylum}(100);Cystobasidiomycetes{class}(100);Cystobasidiomycetes_ord_Incertae_sedis{order}(100);Buckleyzymaceae{family}(100);Buckleyzyma{genus}(100);Buckleyzyma_kluyveri-nielii{species}(100)	Fungi	Basidiomycota	Cystobasidiomycetes	Cystobasidiomycetes_ord_Incertae_sedis	Buckleyzymaceae	Buckleyzyma	Buckleyzyma_kluyveri-nielii
ASV2082	0	0	0	0	4	0	0	0	0	0	0	0	0	0	0	0	0	4	Fungi{superkingdom}(61);Ascomycota{phylum}(61);Sordariomycetes{class}(61);Xylariales{order}(61);Diatrypaceae{family}(61);Monosporascus{genus}(61);Unassigned{species}(0)	Fungi	Ascomycota	Sordariomycetes	Xylariales	Diatrypaceae	Monosporascus	Unassigned
ASV2085	0	0	0	0	0	0	0	0	0	0	0	0	0	0	25	0	0	25	Fungi{superkingdom}(99);Ascomycota{phylum}(99);Sordariomycetes{class}(99);Hypocreales{order}(99);Stachybotryaceae{family}(99);Striatibotrys{genus}(99);Striatibotrys_eucylindrospora{species}(99)	Fungi	Ascomycota	Sordariomycetes	Hypocreales	Stachybotryaceae	Striatibotrys	Striatibotrys_eucylindrospora
ASV2100	0	0	0	0	0	0	0	0	0	44	0	0	0	0	0	0	0	44	Fungi{superkingdom}(66);unidentified{phylum}(66);unidentified{class}(66);unidentified{order}(66);unidentified{family}(66);unidentified{genus}(66);unidentified{species}(66)	Fungi	unidentified	unidentified	unidentified	unidentified	unidentified	unidentified
ASV2105	0	0	0	0	0	0	0	0	0	0	0	0	0	0	39	0	0	39	Fungi{superkingdom}(73);Ascomycota{phylum}(73);Unassigned{class}(0);Unassigned{order}(0);Unassigned{family}(0);Unassigned{genus}(0);Unassigned{species}(0)	Fungi	Ascomycota	Unassigned	Unassigned	Unassigned	Unassigned	Unassigned
ASV2106	0	0	0	0	0	0	0	0	0	0	0	0	0	0	0	44	0	44	Fungi{superkingdom}(100);Unassigned{phylum}(0);Unassigned{class}(0);Unassigned{order}(0);Unassigned{family}(0);Unassigned{genus}(0);Unassigned{species}(0)	Fungi	Unassigned	Unassigned	Unassigned	Unassigned	Unassigned	Unassigned
ASV2107	0	0	0	0	2	0	0	0	0	0	0	0	0	0	0	0	0	2	Fungi{superkingdom}(98);Ascomycota{phylum}(98);Sordariomycetes{class}(98);Xylariales{order}(98);Xylariaceae{family}(98);Unassigned{genus}(0);Unassigned{species}(0)	Fungi	Ascomycota	Sordariomycetes	Xylariales	Xylariaceae	Unassigned	Unassigned
ASV2113	0	0	0	0	0	0	0	0	0	0	0	0	10	0	0	0	0	10	Fungi{superkingdom}(92);unidentified{phylum}(92);unidentified{class}(92);unidentified{order}(92);unidentified{family}(92);unidentified{genus}(92);unidentified{species}(92)	Fungi	unidentified	unidentified	unidentified	unidentified	unidentified	unidentified
ASV2117	0	0	0	0	0	0	0	0	0	0	0	0	0	14	0	0	0	14	Fungi{superkingdom}(100);Basidiomycota{phylum}(100);Microbotryomycetes{class}(100);Sporidiobolales{order}(100);Sporidiobolaceae{family}(100);Rhodotorula{genus}(100);Unassigned{species}(0)	Fungi	Basidiomycota	Microbotryomycetes	Sporidiobolales	Sporidiobolaceae	Rhodotorula	Unassigned
ASV2119	0	0	0	0	0	0	43	0	0	0	0	0	0	0	0	0	0	43	Fungi{superkingdom}(98);Basidiomycota{phylum}(98);Agaricomycetes{class}(98);Polyporales{order}(98);Phanerochaetaceae{family}(98);Phanerochaete{genus}(98);Phanerochaete_chrysosporium{species}(98)	Fungi	Basidiomycota	Agaricomycetes	Polyporales	Phanerochaetaceae	Phanerochaete	Phanerochaete_chrysosporium
ASV2120	0	0	0	0	0	0	0	0	0	0	0	23	0	0	0	0	20	43	Fungi{superkingdom}(77);unidentified{phylum}(77);unidentified{class}(77);unidentified{order}(77);unidentified{family}(77);unidentified{genus}(77);unidentified{species}(77)	Fungi	unidentified	unidentified	unidentified	unidentified	unidentified	unidentified
ASV2126	0	0	0	0	0	0	0	0	0	0	10	0	0	0	0	0	0	10	Fungi{superkingdom}(66);unidentified{phylum}(66);unidentified{class}(66);unidentified{order}(66);unidentified{family}(66);unidentified{genus}(66);unidentified{species}(66)	Fungi	unidentified	unidentified	unidentified	unidentified	unidentified	unidentified
ASV2142	0	0	0	0	0	0	0	0	0	0	2	0	0	0	0	0	0	2	Fungi{superkingdom}(96);Ascomycota{phylum}(96);Sordariomycetes{class}(96);Sordariales{order}(96);Chaetomiaceae{family}(96);Zopfiella{genus}(96);Zopfiella_marina{species}(96)	Fungi	Ascomycota	Sordariomycetes	Sordariales	Chaetomiaceae	Zopfiella	Zopfiella_marina
ASV2148	0	0	0	0	0	0	0	42	0	0	0	0	0	0	0	0	0	42	Fungi{superkingdom}(79);Basidiomycota{phylum}(79);Agaricomycetes{class}(79);Agaricales{order}(79);unidentified{family}(79);unidentified{genus}(79);unidentified{species}(79)	Fungi	Basidiomycota	Agaricomycetes	Agaricales	unidentified	unidentified	unidentified
ASV2156	0	0	0	0	0	0	0	0	0	0	0	0	0	0	42	0	0	42	Fungi{superkingdom}(100);Unassigned{phylum}(0);Unassigned{class}(0);Unassigned{order}(0);Unassigned{family}(0);Unassigned{genus}(0);Unassigned{species}(0)	Fungi	Unassigned	Unassigned	Unassigned	Unassigned	Unassigned	Unassigned
ASV2157	0	0	0	0	0	0	0	0	0	0	0	0	0	0	42	0	0	42	Fungi{superkingdom}(97);Ascomycota{phylum}(97);Eurotiomycetes{class}(97);Chaetothyriales{order}(97);Trichomeriaceae{family}(97);Bradymyces{genus}(97);unidentified{species}(97)	Fungi	Ascomycota	Eurotiomycetes	Chaetothyriales	Trichomeriaceae	Bradymyces	unidentified
ASV2158	41	0	0	0	0	0	0	0	0	0	0	0	0	0	0	0	0	41	Fungi{superkingdom}(100);Ascomycota{phylum}(100);Eurotiomycetes{class}(100);Mycocaliciales{order}(100);Mycocaliciaceae{family}(100);Mycocalicium{genus}(100);Mycocalicium_victoriae{species}(100)	Fungi	Ascomycota	Eurotiomycetes	Mycocaliciales	Mycocaliciaceae	Mycocalicium	Mycocalicium_victoriae
ASV2175	0	0	0	0	0	0	0	0	0	0	41	0	0	0	0	0	0	41	Fungi{superkingdom}(100);Unassigned{phylum}(0);Unassigned{class}(0);Unassigned{order}(0);Unassigned{family}(0);Unassigned{genus}(0);Unassigned{species}(0)	Fungi	Unassigned	Unassigned	Unassigned	Unassigned	Unassigned	Unassigned
ASV2177	0	0	0	0	0	0	0	0	0	0	0	0	0	0	41	0	0	41	Fungi{superkingdom}(85);unidentified{phylum}(85);unidentified{class}(85);unidentified{order}(85);unidentified{family}(85);unidentified{genus}(85);unidentified{species}(85)	Fungi	unidentified	unidentified	unidentified	unidentified	unidentified	unidentified
ASV2178	0	19	0	0	0	0	0	0	0	0	0	0	0	0	0	0	0	19	Fungi{superkingdom}(98);Ascomycota{phylum}(98);Eurotiomycetes{class}(98);Chaetothyriales{order}(98);unidentified{family}(98);unidentified{genus}(98);unidentified{species}(98)	Fungi	Ascomycota	Eurotiomycetes	Chaetothyriales	unidentified	unidentified	unidentified
ASV2179	0	0	40	0	0	0	0	0	0	0	0	0	0	0	0	0	0	40	Fungi{superkingdom}(100);Ascomycota{phylum}(100);Dothideomycetes{class}(100);Pleosporales{order}(100);Didymosphaeriaceae{family}(100);Kalmusia{genus}(100);unidentified{species}(100)	Fungi	Ascomycota	Dothideomycetes	Pleosporales	Didymosphaeriaceae	Kalmusia	unidentified
ASV2180	0	0	37	0	0	0	0	0	0	0	0	0	0	0	0	0	0	37	Fungi{superkingdom}(100);Ascomycota{phylum}(100);Pezizomycetes{class}(100);Pezizales{order}(100);Pyronemataceae{family}(100);Scutellinia{genus}(100);unidentified{species}(100)	Fungi	Ascomycota	Pezizomycetes	Pezizales	Pyronemataceae	Scutellinia	unidentified
ASV2184	0	0	0	0	0	0	0	0	0	0	27	0	0	0	0	0	0	27	Fungi{superkingdom}(76);unidentified{phylum}(76);unidentified{class}(76);unidentified{order}(76);unidentified{family}(76);unidentified{genus}(76);unidentified{species}(76)	Fungi	unidentified	unidentified	unidentified	unidentified	unidentified	unidentified
ASV2188	0	0	0	0	0	0	0	0	0	0	0	13	0	16	0	0	0	29	Fungi{superkingdom}(99);Ascomycota{phylum}(99);Eurotiomycetes{class}(99);Eurotiales{order}(99);Aspergillaceae{family}(99);Aspergillus{genus}(99);Aspergillus_penicillioides{species}(99)	Fungi	Ascomycota	Eurotiomycetes	Eurotiales	Aspergillaceae	Aspergillus	Aspergillus_penicillioides
ASV2200	0	0	0	0	0	0	19	0	0	0	0	0	0	0	0	0	0	19	Fungi{superkingdom}(100);Unassigned{phylum}(0);Unassigned{class}(0);Unassigned{order}(0);Unassigned{family}(0);Unassigned{genus}(0);Unassigned{species}(0)	Fungi	Unassigned	Unassigned	Unassigned	Unassigned	Unassigned	Unassigned
ASV2202	0	0	0	0	0	0	0	0	0	0	40	0	0	0	0	0	0	40	Fungi{superkingdom}(100);Ascomycota{phylum}(100);Eurotiomycetes{class}(100);Onygenales{order}(100);Onygenales_fam_Incertae_sedis{family}(100);Chrysosporium{genus}(100);Chrysosporium_lobatum{species}(100)	Fungi	Ascomycota	Eurotiomycetes	Onygenales	Onygenales_fam_Incertae_sedis	Chrysosporium	Chrysosporium_lobatum
ASV2208	0	36	0	0	0	0	0	0	0	0	0	0	0	0	0	0	0	36	Fungi{superkingdom}(64);Ascomycota{phylum}(64);Eurotiomycetes{class}(64);Chaetothyriales{order}(64);unidentified{family}(64);unidentified{genus}(64);unidentified{species}(64)	Fungi	Ascomycota	Eurotiomycetes	Chaetothyriales	unidentified	unidentified	unidentified
ASV2210	0	0	0	0	0	0	0	0	0	0	0	0	0	0	29	0	0	29	Fungi{superkingdom}(91);unidentified{phylum}(91);unidentified{class}(91);unidentified{order}(91);unidentified{family}(91);unidentified{genus}(91);unidentified{species}(91)	Fungi	unidentified	unidentified	unidentified	unidentified	unidentified	unidentified
ASV2223	0	0	0	0	0	0	0	0	0	0	0	39	0	0	0	0	0	39	Fungi{superkingdom}(100);Ascomycota{phylum}(100);Dothideomycetes{class}(100);Pleosporales{order}(100);Cucurbitariaceae{family}(100);Pyrenochaetopsis{genus}(100);Pyrenochaetopsis_leptospora{species}(100)	Fungi	Ascomycota	Dothideomycetes	Pleosporales	Cucurbitariaceae	Pyrenochaetopsis	Pyrenochaetopsis_leptospora
ASV2225	0	0	0	0	0	0	0	0	0	0	0	0	0	39	0	0	0	39	Fungi{superkingdom}(100);Ascomycota{phylum}(100);Eurotiomycetes{class}(100);Eurotiales{order}(100);Aspergillaceae{family}(100);Aspergillus{genus}(100);Aspergillus_protuberus{species}(100)	Fungi	Ascomycota	Eurotiomycetes	Eurotiales	Aspergillaceae	Aspergillus	Aspergillus_protuberus
ASV2226	0	0	0	0	0	0	0	0	0	0	0	0	0	0	39	0	0	39	Fungi{superkingdom}(75);Ascomycota{phylum}(75);Pezizomycetes{class}(75);Pezizales{order}(75);Pyronemataceae{family}(75);unidentified{genus}(75);unidentified{species}(75)	Fungi	Ascomycota	Pezizomycetes	Pezizales	Pyronemataceae	unidentified	unidentified
ASV2227	0	38	0	0	0	0	0	0	0	0	0	0	0	0	0	0	0	38	Fungi{superkingdom}(92);unidentified{phylum}(92);unidentified{class}(92);unidentified{order}(92);unidentified{family}(92);unidentified{genus}(92);unidentified{species}(92)	Fungi	unidentified	unidentified	unidentified	unidentified	unidentified	unidentified
ASV2228	0	38	0	0	0	0	0	0	0	0	0	0	0	0	0	0	0	38	Fungi{superkingdom}(89);unidentified{phylum}(89);unidentified{class}(89);unidentified{order}(89);unidentified{family}(89);unidentified{genus}(89);unidentified{species}(89)	Fungi	unidentified	unidentified	unidentified	unidentified	unidentified	unidentified
ASV2229	0	0	9	0	0	0	0	0	0	0	0	0	0	0	0	0	0	9	Fungi{superkingdom}(100);Ascomycota{phylum}(100);Sordariomycetes{class}(100);Microascales{order}(100);Microascaceae{family}(100);Mycochlamys{genus}(100);Mycochlamys_macrospora{species}(100)	Fungi	Ascomycota	Sordariomycetes	Microascales	Microascaceae	Mycochlamys	Mycochlamys_macrospora
ASV2230	0	0	0	0	0	38	0	0	0	0	0	0	0	0	0	0	0	38	Fungi{superkingdom}(100);Unassigned{phylum}(0);Unassigned{class}(0);Unassigned{order}(0);Unassigned{family}(0);Unassigned{genus}(0);Unassigned{species}(0)	Fungi	Unassigned	Unassigned	Unassigned	Unassigned	Unassigned	Unassigned
ASV2232	0	0	0	0	0	0	0	0	0	0	0	16	0	0	0	0	0	16	Fungi{superkingdom}(79);Ascomycota{phylum}(79);Sordariomycetes{class}(79);Xylariales{order}(79);Xylariales_fam_Incertae_sedis{family}(79);Phialemoniopsis{genus}(79);Phialemoniopsis_ocularis{species}(79)	Fungi	Ascomycota	Sordariomycetes	Xylariales	Xylariales_fam_Incertae_sedis	Phialemoniopsis	Phialemoniopsis_ocularis
ASV2240	0	0	0	0	0	0	0	17	0	0	0	0	0	0	0	0	0	17	Fungi{superkingdom}(100);Unassigned{phylum}(0);Unassigned{class}(0);Unassigned{order}(0);Unassigned{family}(0);Unassigned{genus}(0);Unassigned{species}(0)	Fungi	Unassigned	Unassigned	Unassigned	Unassigned	Unassigned	Unassigned
ASV2256	0	0	0	0	0	0	0	0	0	0	0	16	0	0	0	0	0	16	Fungi{superkingdom}(100);Basidiomycota{phylum}(100);Malasseziomycetes{class}(100);Malasseziales{order}(100);unidentified{family}(100);unidentified{genus}(100);unidentified{species}(100)	Fungi	Basidiomycota	Malasseziomycetes	Malasseziales	unidentified	unidentified	unidentified
ASV2257	0	0	0	0	0	0	0	38	0	0	0	0	0	0	0	0	0	38	Fungi{superkingdom}(64);unidentified{phylum}(64);unidentified{class}(64);unidentified{order}(64);unidentified{family}(64);unidentified{genus}(64);unidentified{species}(64)	Fungi	unidentified	unidentified	unidentified	unidentified	unidentified	unidentified
ASV2260	0	0	0	0	0	0	0	0	0	0	0	0	0	38	0	0	0	38	Fungi{superkingdom}(100);Unassigned{phylum}(0);Unassigned{class}(0);Unassigned{order}(0);Unassigned{family}(0);Unassigned{genus}(0);Unassigned{species}(0)	Fungi	Unassigned	Unassigned	Unassigned	Unassigned	Unassigned	Unassigned
ASV2261	0	0	0	0	0	0	0	0	0	0	0	0	0	0	38	0	0	38	Fungi{superkingdom}(96);unidentified{phylum}(96);unidentified{class}(96);unidentified{order}(96);unidentified{family}(96);unidentified{genus}(96);unidentified{species}(96)	Fungi	unidentified	unidentified	unidentified	unidentified	unidentified	unidentified
ASV2262	7	0	0	0	0	9	0	0	0	0	0	0	0	0	0	0	0	16	Fungi{superkingdom}(99);unidentified{phylum}(99);unidentified{class}(99);unidentified{order}(99);unidentified{family}(99);unidentified{genus}(99);unidentified{species}(99)	Fungi	unidentified	unidentified	unidentified	unidentified	unidentified	unidentified
ASV2263	0	37	0	0	0	0	0	0	0	0	0	0	0	0	0	0	0	37	Fungi{superkingdom}(92);unidentified{phylum}(92);unidentified{class}(92);unidentified{order}(92);unidentified{family}(92);unidentified{genus}(92);unidentified{species}(92)	Fungi	unidentified	unidentified	unidentified	unidentified	unidentified	unidentified
ASV2264	0	10	0	0	0	0	0	0	0	0	0	0	0	0	0	0	0	10	Fungi{superkingdom}(96);unidentified{phylum}(96);unidentified{class}(96);unidentified{order}(96);unidentified{family}(96);unidentified{genus}(96);unidentified{species}(96)	Fungi	unidentified	unidentified	unidentified	unidentified	unidentified	unidentified
ASV2293	0	0	0	0	0	0	0	0	0	0	0	0	0	0	37	0	0	37	Fungi{superkingdom}(97);Ascomycota{phylum}(97);Sordariomycetes{class}(97);Sordariales{order}(97);Lasiosphaeriaceae{family}(97);Schizothecium{genus}(97);Schizothecium_inaequale{species}(97)	Fungi	Ascomycota	Sordariomycetes	Sordariales	Lasiosphaeriaceae	Schizothecium	Schizothecium_inaequale
ASV2294	0	0	0	0	0	0	0	0	0	0	0	0	0	0	0	37	0	37	Fungi{superkingdom}(81);Ascomycota{phylum}(81);Dothideomycetes{class}(81);Pleosporales{order}(81);Phaeosphaeriaceae{family}(81);Paraphoma{genus}(81);Paraphoma_pye{species}(81)	Fungi	Ascomycota	Dothideomycetes	Pleosporales	Phaeosphaeriaceae	Paraphoma	Paraphoma_pye
ASV2295	0	13	0	0	0	0	0	0	0	0	0	0	0	0	0	0	0	13	Fungi{superkingdom}(100);Basidiomycota{phylum}(100);Agaricomycetes{class}(100);Agaricales{order}(100);Entolomataceae{family}(100);Entoloma{genus}(100);Unassigned{species}(0)	Fungi	Basidiomycota	Agaricomycetes	Agaricales	Entolomataceae	Entoloma	Unassigned
ASV2298	0	0	0	0	0	0	0	0	0	0	0	7	0	0	0	16	0	23	Fungi{superkingdom}(100);Unassigned{phylum}(0);Unassigned{class}(0);Unassigned{order}(0);Unassigned{family}(0);Unassigned{genus}(0);Unassigned{species}(0)	Fungi	Unassigned	Unassigned	Unassigned	Unassigned	Unassigned	Unassigned
ASV2305	0	0	0	0	0	0	0	0	0	6	0	0	0	0	0	0	0	6	Fungi{superkingdom}(100);Ascomycota{phylum}(100);Eurotiomycetes{class}(100);Eurotiales{order}(100);Aspergillaceae{family}(100);Penicillium{genus}(100);Unassigned{species}(0)	Fungi	Ascomycota	Eurotiomycetes	Eurotiales	Aspergillaceae	Penicillium	Unassigned
ASV2313	0	0	0	0	0	0	0	0	0	36	0	0	0	0	0	0	0	36	Fungi{superkingdom}(100);Unassigned{phylum}(0);Unassigned{class}(0);Unassigned{order}(0);Unassigned{family}(0);Unassigned{genus}(0);Unassigned{species}(0)	Fungi	Unassigned	Unassigned	Unassigned	Unassigned	Unassigned	Unassigned
ASV2319	0	0	0	0	0	0	0	0	0	0	0	0	18	0	0	0	0	18	Fungi{superkingdom}(100);Unassigned{phylum}(0);Unassigned{class}(0);Unassigned{order}(0);Unassigned{family}(0);Unassigned{genus}(0);Unassigned{species}(0)	Fungi	Unassigned	Unassigned	Unassigned	Unassigned	Unassigned	Unassigned
ASV2320	0	35	0	0	0	0	0	0	0	0	0	0	0	0	0	0	0	35	Fungi{superkingdom}(85);unidentified{phylum}(85);unidentified{class}(85);unidentified{order}(85);unidentified{family}(85);unidentified{genus}(85);unidentified{species}(85)	Fungi	unidentified	unidentified	unidentified	unidentified	unidentified	unidentified
ASV2321	0	0	25	0	0	0	0	0	0	0	0	10	0	0	0	0	0	35	Fungi{superkingdom}(65);unidentified{phylum}(65);unidentified{class}(65);unidentified{order}(65);unidentified{family}(65);unidentified{genus}(65);unidentified{species}(65)	Fungi	unidentified	unidentified	unidentified	unidentified	unidentified	unidentified
ASV2322	0	0	0	35	0	0	0	0	0	0	0	0	0	0	0	0	0	35	Fungi{superkingdom}(100);Ascomycota{phylum}(100);Eurotiomycetes{class}(100);Eurotiales{order}(100);Aspergillaceae{family}(100);Penicillium{genus}(100);Unassigned{species}(0)	Fungi	Ascomycota	Eurotiomycetes	Eurotiales	Aspergillaceae	Penicillium	Unassigned
ASV2345	0	0	0	0	0	0	0	0	0	12	0	0	0	0	0	0	0	12	Fungi{superkingdom}(76);unidentified{phylum}(76);unidentified{class}(76);unidentified{order}(76);unidentified{family}(76);unidentified{genus}(76);unidentified{species}(76)	Fungi	unidentified	unidentified	unidentified	unidentified	unidentified	unidentified
ASV2352	0	0	0	0	0	0	0	0	0	0	0	0	0	35	0	0	0	35	Fungi{superkingdom}(100);Unassigned{phylum}(0);Unassigned{class}(0);Unassigned{order}(0);Unassigned{family}(0);Unassigned{genus}(0);Unassigned{species}(0)	Fungi	Unassigned	Unassigned	Unassigned	Unassigned	Unassigned	Unassigned
ASV2353	0	0	0	0	0	0	0	0	0	0	0	0	0	0	0	35	0	35	Fungi{superkingdom}(98);Ascomycota{phylum}(98);Dothideomycetes{class}(98);Pleosporales{order}(98);Sporormiaceae{family}(98);Westerdykella{genus}(98);Westerdykella_centenaria{species}(98)	Fungi	Ascomycota	Dothideomycetes	Pleosporales	Sporormiaceae	Westerdykella	Westerdykella_centenaria
ASV2354	34	0	0	0	0	0	0	0	0	0	0	0	0	0	0	0	0	34	Fungi{superkingdom}(69);Glomeromycota{phylum}(69);Glomeromycetes{class}(69);Glomerales{order}(69);Glomeraceae{family}(69);Glomus{genus}(69);Glomus_aggregatum{species}(69)	Fungi	Glomeromycota	Glomeromycetes	Glomerales	Glomeraceae	Glomus	Glomus_aggregatum
ASV2355	0	34	0	0	0	0	0	0	0	0	0	0	0	0	0	0	0	34	Fungi{superkingdom}(89);unidentified{phylum}(89);unidentified{class}(89);unidentified{order}(89);unidentified{family}(89);unidentified{genus}(89);unidentified{species}(89)	Fungi	unidentified	unidentified	unidentified	unidentified	unidentified	unidentified
ASV2356	0	34	0	0	0	0	0	0	0	0	0	0	0	0	0	0	0	34	Fungi{superkingdom}(92);unidentified{phylum}(92);unidentified{class}(92);unidentified{order}(92);unidentified{family}(92);unidentified{genus}(92);unidentified{species}(92)	Fungi	unidentified	unidentified	unidentified	unidentified	unidentified	unidentified
ASV2357	0	0	34	0	0	0	0	0	0	0	0	0	0	0	0	0	0	34	Fungi{superkingdom}(87);unidentified{phylum}(87);unidentified{class}(87);unidentified{order}(87);unidentified{family}(87);unidentified{genus}(87);unidentified{species}(87)	Fungi	unidentified	unidentified	unidentified	unidentified	unidentified	unidentified
ASV2359	0	0	0	0	0	0	0	0	0	0	0	28	0	0	0	0	0	28	Fungi{superkingdom}(91);unidentified{phylum}(91);unidentified{class}(91);unidentified{order}(91);unidentified{family}(91);unidentified{genus}(91);unidentified{species}(91)	Fungi	unidentified	unidentified	unidentified	unidentified	unidentified	unidentified
ASV2380	0	0	0	0	0	0	0	34	0	0	0	0	0	0	0	0	0	34	Fungi{superkingdom}(92);unidentified{phylum}(92);unidentified{class}(92);unidentified{order}(92);unidentified{family}(92);unidentified{genus}(92);unidentified{species}(92)	Fungi	unidentified	unidentified	unidentified	unidentified	unidentified	unidentified
ASV2381	0	0	0	0	0	0	0	0	0	14	0	0	0	0	0	20	0	34	Fungi{superkingdom}(100);Unassigned{phylum}(0);Unassigned{class}(0);Unassigned{order}(0);Unassigned{family}(0);Unassigned{genus}(0);Unassigned{species}(0)	Fungi	Unassigned	Unassigned	Unassigned	Unassigned	Unassigned	Unassigned
ASV2384	0	0	0	0	0	0	0	0	0	0	0	34	0	0	0	0	0	34	Fungi{superkingdom}(70);unidentified{phylum}(70);unidentified{class}(70);unidentified{order}(70);unidentified{family}(70);unidentified{genus}(70);unidentified{species}(70)	Fungi	unidentified	unidentified	unidentified	unidentified	unidentified	unidentified
ASV2385	0	0	0	0	0	0	0	0	0	0	0	34	0	0	0	0	0	34	Fungi{superkingdom}(88);unidentified{phylum}(88);unidentified{class}(88);unidentified{order}(88);unidentified{family}(88);unidentified{genus}(88);unidentified{species}(88)	Fungi	unidentified	unidentified	unidentified	unidentified	unidentified	unidentified
ASV2388	0	0	0	0	0	0	0	0	0	0	0	0	0	34	0	0	0	34	Fungi{superkingdom}(70);Ascomycota{phylum}(70);Dothideomycetes{class}(70);Pleosporales{order}(70);Lophiostomataceae{family}(70);Lophiostoma{genus}(70);Lophiostoma_rosae{species}(70)	Fungi	Ascomycota	Dothideomycetes	Pleosporales	Lophiostomataceae	Lophiostoma	Lophiostoma_rosae
ASV2389	0	0	0	0	0	0	0	0	0	0	0	0	0	34	0	0	0	34	Fungi{superkingdom}(72);Ascomycota{phylum}(72);Dothideomycetes{class}(72);Pleosporales{order}(72);Periconiaceae{family}(72);Periconia{genus}(72);Periconia_macrospinosa{species}(72)	Fungi	Ascomycota	Dothideomycetes	Pleosporales	Periconiaceae	Periconia	Periconia_macrospinosa
ASV2390	10	0	0	0	0	0	0	0	0	0	0	0	0	0	0	0	0	10	Fungi{superkingdom}(98);unidentified{phylum}(98);unidentified{class}(98);unidentified{order}(98);unidentified{family}(98);unidentified{genus}(98);unidentified{species}(98)	Fungi	unidentified	unidentified	unidentified	unidentified	unidentified	unidentified
ASV2391	0	0	19	0	0	0	0	0	0	0	0	0	0	0	0	14	0	33	Fungi{superkingdom}(100);Unassigned{phylum}(0);Unassigned{class}(0);Unassigned{order}(0);Unassigned{family}(0);Unassigned{genus}(0);Unassigned{species}(0)	Fungi	Unassigned	Unassigned	Unassigned	Unassigned	Unassigned	Unassigned
ASV2392	0	0	0	0	0	0	31	0	0	0	0	0	0	0	0	0	0	31	Fungi{superkingdom}(97);unidentified{phylum}(97);unidentified{class}(97);unidentified{order}(97);unidentified{family}(97);unidentified{genus}(97);unidentified{species}(97)	Fungi	unidentified	unidentified	unidentified	unidentified	unidentified	unidentified
ASV2398	0	0	0	0	0	0	0	0	0	0	0	0	0	0	0	20	0	20	Fungi{superkingdom}(96);unidentified{phylum}(96);unidentified{class}(96);unidentified{order}(96);unidentified{family}(96);unidentified{genus}(96);unidentified{species}(96)	Fungi	unidentified	unidentified	unidentified	unidentified	unidentified	unidentified
ASV2411	0	32	0	0	0	0	0	0	0	0	0	0	0	0	0	0	0	32	Fungi{superkingdom}(91);unidentified{phylum}(91);unidentified{class}(91);unidentified{order}(91);unidentified{family}(91);unidentified{genus}(91);unidentified{species}(91)	Fungi	unidentified	unidentified	unidentified	unidentified	unidentified	unidentified
ASV2412	0	32	0	0	0	0	0	0	0	0	0	0	0	0	0	0	0	32	Fungi{superkingdom}(94);Ascomycota{phylum}(94);Eurotiomycetes{class}(94);Chaetothyriales{order}(94);unidentified{family}(94);unidentified{genus}(94);unidentified{species}(94)	Fungi	Ascomycota	Eurotiomycetes	Chaetothyriales	unidentified	unidentified	unidentified
ASV2432	0	0	0	0	0	0	0	17	0	0	0	0	0	0	0	0	0	17	Fungi{superkingdom}(89);unidentified{phylum}(89);unidentified{class}(89);unidentified{order}(89);unidentified{family}(89);unidentified{genus}(89);unidentified{species}(89)	Fungi	unidentified	unidentified	unidentified	unidentified	unidentified	unidentified
ASV2433	0	0	0	0	0	0	0	0	0	32	0	0	0	0	0	0	0	32	Fungi{superkingdom}(68);Ascomycota{phylum}(68);Sordariomycetes{class}(68);unidentified{order}(68);unidentified{family}(68);unidentified{genus}(68);unidentified{species}(68)	Fungi	Ascomycota	Sordariomycetes	unidentified	unidentified	unidentified	unidentified
ASV2434	0	0	0	0	0	0	0	0	0	0	0	32	0	0	0	0	0	32	Fungi{superkingdom}(100);Unassigned{phylum}(0);Unassigned{class}(0);Unassigned{order}(0);Unassigned{family}(0);Unassigned{genus}(0);Unassigned{species}(0)	Fungi	Unassigned	Unassigned	Unassigned	Unassigned	Unassigned	Unassigned
ASV2436	0	0	0	0	0	0	0	0	0	0	0	0	0	0	32	0	0	32	Fungi{superkingdom}(97);unidentified{phylum}(97);unidentified{class}(97);unidentified{order}(97);unidentified{family}(97);unidentified{genus}(97);unidentified{species}(97)	Fungi	unidentified	unidentified	unidentified	unidentified	unidentified	unidentified
ASV2437	6	0	0	0	0	0	0	0	0	0	0	0	0	0	0	3	0	9	Fungi{superkingdom}(100);Unassigned{phylum}(0);Unassigned{class}(0);Unassigned{order}(0);Unassigned{family}(0);Unassigned{genus}(0);Unassigned{species}(0)	Fungi	Unassigned	Unassigned	Unassigned	Unassigned	Unassigned	Unassigned
ASV2440	0	0	0	0	0	0	0	0	0	0	0	0	0	0	0	29	0	29	Fungi{superkingdom}(100);Unassigned{phylum}(0);Unassigned{class}(0);Unassigned{order}(0);Unassigned{family}(0);Unassigned{genus}(0);Unassigned{species}(0)	Fungi	Unassigned	Unassigned	Unassigned	Unassigned	Unassigned	Unassigned
ASV2459	0	0	0	0	0	0	0	0	0	0	0	0	0	31	0	0	0	31	Fungi{superkingdom}(81);unidentified{phylum}(81);unidentified{class}(81);unidentified{order}(81);unidentified{family}(81);unidentified{genus}(81);unidentified{species}(81)	Fungi	unidentified	unidentified	unidentified	unidentified	unidentified	unidentified
ASV2460	0	30	0	0	0	0	0	0	0	0	0	0	0	0	0	0	0	30	Fungi{superkingdom}(89);unidentified{phylum}(89);unidentified{class}(89);unidentified{order}(89);unidentified{family}(89);unidentified{genus}(89);unidentified{species}(89)	Fungi	unidentified	unidentified	unidentified	unidentified	unidentified	unidentified
ASV2461	0	0	0	6	0	0	0	0	0	0	0	0	0	0	0	0	0	6	Fungi{superkingdom}(79);Ascomycota{phylum}(79);Sordariomycetes{class}(79);Hypocreales{order}(79);Unassigned{family}(0);Unassigned{genus}(0);Unassigned{species}(0)	Fungi	Ascomycota	Sordariomycetes	Hypocreales	Unassigned	Unassigned	Unassigned
ASV2468	0	0	0	0	0	0	0	0	17	0	0	0	0	0	0	0	0	17	Fungi{superkingdom}(99);Chytridiomycota{phylum}(99);Spizellomycetes{class}(99);Spizellomycetales{order}(99);Spizellomycetaceae{family}(99);unidentified{genus}(99);unidentified{species}(99)	Fungi	Chytridiomycota	Spizellomycetes	Spizellomycetales	Spizellomycetaceae	unidentified	unidentified
ASV2486	0	0	0	0	0	0	0	0	0	0	0	0	0	0	9	0	0	9	Fungi{superkingdom}(92);unidentified{phylum}(92);unidentified{class}(92);unidentified{order}(92);unidentified{family}(92);unidentified{genus}(92);unidentified{species}(92)	Fungi	unidentified	unidentified	unidentified	unidentified	unidentified	unidentified
ASV2489	0	0	0	0	0	0	0	30	0	0	0	0	0	0	0	0	0	30	Fungi{superkingdom}(90);Chytridiomycota{phylum}(90);unidentified{class}(90);unidentified{order}(90);unidentified{family}(90);unidentified{genus}(90);unidentified{species}(90)	Fungi	Chytridiomycota	unidentified	unidentified	unidentified	unidentified	unidentified
ASV2490	0	0	0	0	0	0	0	30	0	0	0	0	0	0	0	0	0	30	Fungi{superkingdom}(95);Ascomycota{phylum}(95);Sordariomycetes{class}(95);Hypocreales{order}(95);Bionectriaceae{family}(95);Clonostachys{genus}(95);Clonostachys_rosea{species}(95)	Fungi	Ascomycota	Sordariomycetes	Hypocreales	Bionectriaceae	Clonostachys	Clonostachys_rosea
ASV2491	0	0	0	0	0	0	0	30	0	0	0	0	0	0	0	0	0	30	Fungi{superkingdom}(100);Unassigned{phylum}(0);Unassigned{class}(0);Unassigned{order}(0);Unassigned{family}(0);Unassigned{genus}(0);Unassigned{species}(0)	Fungi	Unassigned	Unassigned	Unassigned	Unassigned	Unassigned	Unassigned
ASV2495	0	0	0	0	0	0	0	0	0	0	0	0	0	0	0	0	30	30	Fungi{superkingdom}(66);unidentified{phylum}(66);unidentified{class}(66);unidentified{order}(66);unidentified{family}(66);unidentified{genus}(66);unidentified{species}(66)	Fungi	unidentified	unidentified	unidentified	unidentified	unidentified	unidentified
ASV2496	0	12	0	0	0	0	0	0	0	0	0	0	0	0	0	0	0	12	Fungi{superkingdom}(92);Ascomycota{phylum}(92);Sordariomycetes{class}(92);Hypocreales{order}(92);Cordycipitaceae{family}(92);Lecanicillium{genus}(92);Lecanicillium_antillanum{species}(92)	Fungi	Ascomycota	Sordariomycetes	Hypocreales	Cordycipitaceae	Lecanicillium	Lecanicillium_antillanum
ASV2532	0	0	0	0	0	0	0	0	0	29	0	0	0	0	0	0	0	29	Fungi{superkingdom}(100);Unassigned{phylum}(0);Unassigned{class}(0);Unassigned{order}(0);Unassigned{family}(0);Unassigned{genus}(0);Unassigned{species}(0)	Fungi	Unassigned	Unassigned	Unassigned	Unassigned	Unassigned	Unassigned
ASV2535	0	0	0	0	0	0	0	0	0	0	0	29	0	0	0	0	0	29	Fungi{superkingdom}(100);Unassigned{phylum}(0);Unassigned{class}(0);Unassigned{order}(0);Unassigned{family}(0);Unassigned{genus}(0);Unassigned{species}(0)	Fungi	Unassigned	Unassigned	Unassigned	Unassigned	Unassigned	Unassigned
ASV2539	0	0	24	0	0	0	0	0	0	0	0	0	0	0	0	0	0	24	Fungi{superkingdom}(88);unidentified{phylum}(88);unidentified{class}(88);unidentified{order}(88);unidentified{family}(88);unidentified{genus}(88);unidentified{species}(88)	Fungi	unidentified	unidentified	unidentified	unidentified	unidentified	unidentified
ASV2546	0	0	0	0	0	0	0	0	0	0	0	0	0	0	14	4	0	18	Fungi{superkingdom}(66);unidentified{phylum}(66);unidentified{class}(66);unidentified{order}(66);unidentified{family}(66);unidentified{genus}(66);unidentified{species}(66)	Fungi	unidentified	unidentified	unidentified	unidentified	unidentified	unidentified
ASV2561	0	0	0	0	0	0	0	0	0	28	0	0	0	0	0	0	0	28	Fungi{superkingdom}(84);unidentified{phylum}(84);unidentified{class}(84);unidentified{order}(84);unidentified{family}(84);unidentified{genus}(84);unidentified{species}(84)	Fungi	unidentified	unidentified	unidentified	unidentified	unidentified	unidentified
ASV2562	0	0	0	0	0	0	0	0	0	0	0	28	0	0	0	0	0	28	Fungi{superkingdom}(100);Unassigned{phylum}(0);Unassigned{class}(0);Unassigned{order}(0);Unassigned{family}(0);Unassigned{genus}(0);Unassigned{species}(0)	Fungi	Unassigned	Unassigned	Unassigned	Unassigned	Unassigned	Unassigned
ASV2569	0	27	0	0	0	0	0	0	0	0	0	0	0	0	0	0	0	27	Fungi{superkingdom}(66);Ascomycota{phylum}(66);unidentified{class}(66);unidentified{order}(66);unidentified{family}(66);unidentified{genus}(66);unidentified{species}(66)	Fungi	Ascomycota	unidentified	unidentified	unidentified	unidentified	unidentified
ASV2570	0	15	0	0	0	0	0	0	0	0	0	0	0	0	0	0	0	15	Fungi{superkingdom}(80);Ascomycota{phylum}(80);Unassigned{class}(0);Unassigned{order}(0);Unassigned{family}(0);Unassigned{genus}(0);Unassigned{species}(0)	Fungi	Ascomycota	Unassigned	Unassigned	Unassigned	Unassigned	Unassigned
ASV2571	0	0	0	0	5	0	0	0	0	0	0	0	0	0	0	0	0	5	Fungi{superkingdom}(100);Basidiomycota{phylum}(100);Cystobasidiomycetes{class}(100);Cystobasidiales{order}(100);unidentified{family}(100);unidentified{genus}(100);unidentified{species}(100)	Fungi	Basidiomycota	Cystobasidiomycetes	Cystobasidiales	unidentified	unidentified	unidentified
ASV2576	0	0	0	0	0	0	0	0	14	0	0	0	6	0	0	0	0	20	Fungi{superkingdom}(100);Unassigned{phylum}(0);Unassigned{class}(0);Unassigned{order}(0);Unassigned{family}(0);Unassigned{genus}(0);Unassigned{species}(0)	Fungi	Unassigned	Unassigned	Unassigned	Unassigned	Unassigned	Unassigned
ASV2606	0	0	0	0	0	0	0	0	0	0	0	0	0	27	0	0	0	27	Fungi{superkingdom}(100);Unassigned{phylum}(0);Unassigned{class}(0);Unassigned{order}(0);Unassigned{family}(0);Unassigned{genus}(0);Unassigned{species}(0)	Fungi	Unassigned	Unassigned	Unassigned	Unassigned	Unassigned	Unassigned
ASV2607	0	0	0	0	0	0	0	0	0	0	0	0	0	0	0	27	0	27	Fungi{superkingdom}(83);unidentified{phylum}(83);unidentified{class}(83);unidentified{order}(83);unidentified{family}(83);unidentified{genus}(83);unidentified{species}(83)	Fungi	unidentified	unidentified	unidentified	unidentified	unidentified	unidentified
ASV2608	17	0	0	0	0	0	0	0	0	0	0	0	0	0	0	0	0	17	Fungi{superkingdom}(100);Ascomycota{phylum}(100);Sordariomycetes{class}(100);Myrmecridiales{order}(100);Myrmecridiaceae{family}(100);Myrmecridium{genus}(100);Myrmecridium_pulvericola{species}(100)	Fungi	Ascomycota	Sordariomycetes	Myrmecridiales	Myrmecridiaceae	Myrmecridium	Myrmecridium_pulvericola
ASV2609	0	26	0	0	0	0	0	0	0	0	0	0	0	0	0	0	0	26	Fungi{superkingdom}(86);unidentified{phylum}(86);unidentified{class}(86);unidentified{order}(86);unidentified{family}(86);unidentified{genus}(86);unidentified{species}(86)	Fungi	unidentified	unidentified	unidentified	unidentified	unidentified	unidentified
ASV2610	0	23	0	0	0	0	0	0	0	0	0	0	0	0	0	0	0	23	Fungi{superkingdom}(65);Ascomycota{phylum}(65);Eurotiomycetes{class}(65);Chaetothyriales{order}(65);Trichomeriaceae{family}(65);Bradymyces{genus}(65);unidentified{species}(65)	Fungi	Ascomycota	Eurotiomycetes	Chaetothyriales	Trichomeriaceae	Bradymyces	unidentified
ASV2628	0	0	0	0	0	0	0	0	0	26	0	0	0	0	0	0	0	26	Fungi{superkingdom}(93);unidentified{phylum}(93);unidentified{class}(93);unidentified{order}(93);unidentified{family}(93);unidentified{genus}(93);unidentified{species}(93)	Fungi	unidentified	unidentified	unidentified	unidentified	unidentified	unidentified
ASV2638	0	0	0	0	0	0	0	0	0	0	0	0	26	0	0	0	0	26	Fungi{superkingdom}(75);unidentified{phylum}(75);unidentified{class}(75);unidentified{order}(75);unidentified{family}(75);unidentified{genus}(75);unidentified{species}(75)	Fungi	unidentified	unidentified	unidentified	unidentified	unidentified	unidentified
ASV2639	0	0	0	0	0	0	0	0	0	0	0	0	0	26	0	0	0	26	Fungi{superkingdom}(92);unidentified{phylum}(92);unidentified{class}(92);unidentified{order}(92);unidentified{family}(92);unidentified{genus}(92);unidentified{species}(92)	Fungi	unidentified	unidentified	unidentified	unidentified	unidentified	unidentified
ASV2640	0	0	0	0	0	0	0	0	0	0	0	0	0	0	26	0	0	26	Fungi{superkingdom}(60);Basidiomycota{phylum}(60);Unassigned{class}(0);Unassigned{order}(0);Unassigned{family}(0);Unassigned{genus}(0);Unassigned{species}(0)	Fungi	Basidiomycota	Unassigned	Unassigned	Unassigned	Unassigned	Unassigned
ASV2641	0	0	0	0	0	0	0	0	0	0	0	0	0	0	26	0	0	26	Fungi{superkingdom}(68);Ascomycota{phylum}(68);Sordariomycetes{class}(68);unidentified{order}(68);unidentified{family}(68);unidentified{genus}(68);unidentified{species}(68)	Fungi	Ascomycota	Sordariomycetes	unidentified	unidentified	unidentified	unidentified
ASV2642	0	0	0	0	0	0	0	0	0	0	0	0	0	0	0	26	0	26	Fungi{superkingdom}(100);Unassigned{phylum}(0);Unassigned{class}(0);Unassigned{order}(0);Unassigned{family}(0);Unassigned{genus}(0);Unassigned{species}(0)	Fungi	Unassigned	Unassigned	Unassigned	Unassigned	Unassigned	Unassigned
ASV2643	23	0	0	0	0	0	0	0	0	0	0	0	0	0	0	0	0	23	Fungi{superkingdom}(74);Ascomycota{phylum}(74);Sordariomycetes{class}(74);Unassigned{order}(0);Unassigned{family}(0);Unassigned{genus}(0);Unassigned{species}(0)	Fungi	Ascomycota	Sordariomycetes	Unassigned	Unassigned	Unassigned	Unassigned
ASV2644	0	25	0	0	0	0	0	0	0	0	0	0	0	0	0	0	0	25	Fungi{superkingdom}(82);Kickxellomycota{phylum}(82);Kickxellomycetes{class}(82);Kickxellales{order}(82);Kickxellaceae{family}(82);Ramicandelaber{genus}(82);unidentified{species}(82)	Fungi	Kickxellomycota	Kickxellomycetes	Kickxellales	Kickxellaceae	Ramicandelaber	unidentified
ASV2645	0	6	0	0	0	0	0	0	0	0	0	0	0	0	0	0	0	6	Fungi{superkingdom}(88);unidentified{phylum}(88);unidentified{class}(88);unidentified{order}(88);unidentified{family}(88);unidentified{genus}(88);unidentified{species}(88)	Fungi	unidentified	unidentified	unidentified	unidentified	unidentified	unidentified
ASV2646	0	4	0	0	2	0	0	0	0	0	0	0	0	0	0	0	0	6	Fungi{superkingdom}(100);Unassigned{phylum}(0);Unassigned{class}(0);Unassigned{order}(0);Unassigned{family}(0);Unassigned{genus}(0);Unassigned{species}(0)	Fungi	Unassigned	Unassigned	Unassigned	Unassigned	Unassigned	Unassigned
ASV2647	0	0	25	0	0	0	0	0	0	0	0	0	0	0	0	0	0	25	Fungi{superkingdom}(100);Unassigned{phylum}(0);Unassigned{class}(0);Unassigned{order}(0);Unassigned{family}(0);Unassigned{genus}(0);Unassigned{species}(0)	Fungi	Unassigned	Unassigned	Unassigned	Unassigned	Unassigned	Unassigned
ASV2648	0	0	11	0	5	0	0	0	0	0	0	0	0	0	0	0	0	16	Fungi{superkingdom}(89);unidentified{phylum}(89);unidentified{class}(89);unidentified{order}(89);unidentified{family}(89);unidentified{genus}(89);unidentified{species}(89)	Fungi	unidentified	unidentified	unidentified	unidentified	unidentified	unidentified
ASV2682	0	0	0	0	0	0	0	0	25	0	0	0	0	0	0	0	0	25	Fungi{superkingdom}(71);Ascomycota{phylum}(71);Dothideomycetes{class}(71);Pleosporales{order}(71);Lophiostomataceae{family}(71);Lophiostoma{genus}(71);Lophiostoma_rosae{species}(71)	Fungi	Ascomycota	Dothideomycetes	Pleosporales	Lophiostomataceae	Lophiostoma	Lophiostoma_rosae
ASV2683	0	0	0	0	0	0	0	0	0	0	25	0	0	0	0	0	0	25	Fungi{superkingdom}(94);unidentified{phylum}(94);unidentified{class}(94);unidentified{order}(94);unidentified{family}(94);unidentified{genus}(94);unidentified{species}(94)	Fungi	unidentified	unidentified	unidentified	unidentified	unidentified	unidentified
ASV2684	0	0	0	0	0	0	0	0	0	0	25	0	0	0	0	0	0	25	Fungi{superkingdom}(100);Basidiomycota{phylum}(100);Microbotryomycetes{class}(100);Sporidiobolales{order}(100);Sporidiobolaceae{family}(100);Sporobolomyces{genus}(100);Sporobolomyces_patagonicus{species}(100)	Fungi	Basidiomycota	Microbotryomycetes	Sporidiobolales	Sporidiobolaceae	Sporobolomyces	Sporobolomyces_patagonicus
ASV2685	0	0	0	0	0	0	0	0	0	0	0	25	0	0	0	0	0	25	Fungi{superkingdom}(82);unidentified{phylum}(82);unidentified{class}(82);unidentified{order}(82);unidentified{family}(82);unidentified{genus}(82);unidentified{species}(82)	Fungi	unidentified	unidentified	unidentified	unidentified	unidentified	unidentified
ASV2686	0	0	0	0	0	0	0	0	0	0	0	25	0	0	0	0	0	25	Fungi{superkingdom}(98);unidentified{phylum}(98);unidentified{class}(98);unidentified{order}(98);unidentified{family}(98);unidentified{genus}(98);unidentified{species}(98)	Fungi	unidentified	unidentified	unidentified	unidentified	unidentified	unidentified
ASV2696	0	0	0	0	0	0	0	0	0	0	0	0	0	0	0	25	0	25	Fungi{superkingdom}(100);Unassigned{phylum}(0);Unassigned{class}(0);Unassigned{order}(0);Unassigned{family}(0);Unassigned{genus}(0);Unassigned{species}(0)	Fungi	Unassigned	Unassigned	Unassigned	Unassigned	Unassigned	Unassigned
ASV2697	0	0	0	0	0	0	0	0	0	0	0	0	0	0	0	25	0	25	Fungi{superkingdom}(98);unidentified{phylum}(98);unidentified{class}(98);unidentified{order}(98);unidentified{family}(98);unidentified{genus}(98);unidentified{species}(98)	Fungi	unidentified	unidentified	unidentified	unidentified	unidentified	unidentified
ASV2698	0	0	0	0	0	0	0	0	0	0	0	0	0	0	0	0	25	25	Fungi{superkingdom}(100);Unassigned{phylum}(0);Unassigned{class}(0);Unassigned{order}(0);Unassigned{family}(0);Unassigned{genus}(0);Unassigned{species}(0)	Fungi	Unassigned	Unassigned	Unassigned	Unassigned	Unassigned	Unassigned
ASV2699	7	0	0	0	0	0	0	0	0	0	0	0	0	0	0	0	0	7	Fungi{superkingdom}(60);unidentified{phylum}(60);unidentified{class}(60);unidentified{order}(60);unidentified{family}(60);unidentified{genus}(60);unidentified{species}(60)	Fungi	unidentified	unidentified	unidentified	unidentified	unidentified	unidentified
ASV2700	0	20	0	0	0	0	0	0	0	0	0	0	0	0	0	0	0	20	Fungi{superkingdom}(67);Ascomycota{phylum}(67);Eurotiomycetes{class}(67);Chaetothyriales{order}(67);Herpotrichiellaceae{family}(67);unidentified{genus}(67);unidentified{species}(67)	Fungi	Ascomycota	Eurotiomycetes	Chaetothyriales	Herpotrichiellaceae	unidentified	unidentified
ASV2701	0	8	0	0	0	0	0	0	0	0	0	0	0	0	0	0	0	8	Fungi{superkingdom}(100);Unassigned{phylum}(0);Unassigned{class}(0);Unassigned{order}(0);Unassigned{family}(0);Unassigned{genus}(0);Unassigned{species}(0)	Fungi	Unassigned	Unassigned	Unassigned	Unassigned	Unassigned	Unassigned
ASV2732	0	0	0	0	0	0	0	0	24	0	0	0	0	0	0	0	0	24	Fungi{superkingdom}(85);Ascomycota{phylum}(85);Sordariomycetes{class}(85);Unassigned{order}(0);Unassigned{family}(0);Unassigned{genus}(0);Unassigned{species}(0)	Fungi	Ascomycota	Sordariomycetes	Unassigned	Unassigned	Unassigned	Unassigned
ASV2733	0	0	0	0	0	0	0	0	0	0	0	24	0	0	0	0	0	24	Fungi{superkingdom}(82);unidentified{phylum}(82);unidentified{class}(82);unidentified{order}(82);unidentified{family}(82);unidentified{genus}(82);unidentified{species}(82)	Fungi	unidentified	unidentified	unidentified	unidentified	unidentified	unidentified
ASV2739	0	0	0	0	0	0	0	0	0	0	0	0	0	0	24	0	0	24	Fungi{superkingdom}(62);unidentified{phylum}(62);unidentified{class}(62);unidentified{order}(62);unidentified{family}(62);unidentified{genus}(62);unidentified{species}(62)	Fungi	unidentified	unidentified	unidentified	unidentified	unidentified	unidentified
ASV2740	0	0	0	0	0	0	0	0	0	0	0	0	0	0	24	0	0	24	Fungi{superkingdom}(100);Unassigned{phylum}(0);Unassigned{class}(0);Unassigned{order}(0);Unassigned{family}(0);Unassigned{genus}(0);Unassigned{species}(0)	Fungi	Unassigned	Unassigned	Unassigned	Unassigned	Unassigned	Unassigned
ASV2741	0	0	0	0	0	0	0	0	0	0	0	0	0	0	0	24	0	24	Fungi{superkingdom}(72);unidentified{phylum}(72);unidentified{class}(72);unidentified{order}(72);unidentified{family}(72);unidentified{genus}(72);unidentified{species}(72)	Fungi	unidentified	unidentified	unidentified	unidentified	unidentified	unidentified
ASV2742	0	23	0	0	0	0	0	0	0	0	0	0	0	0	0	0	0	23	Fungi{superkingdom}(100);Unassigned{phylum}(0);Unassigned{class}(0);Unassigned{order}(0);Unassigned{family}(0);Unassigned{genus}(0);Unassigned{species}(0)	Fungi	Unassigned	Unassigned	Unassigned	Unassigned	Unassigned	Unassigned
ASV2743	0	0	23	0	0	0	0	0	0	0	0	0	0	0	0	0	0	23	Fungi{superkingdom}(72);unidentified{phylum}(72);unidentified{class}(72);unidentified{order}(72);unidentified{family}(72);unidentified{genus}(72);unidentified{species}(72)	Fungi	unidentified	unidentified	unidentified	unidentified	unidentified	unidentified
ASV2782	0	0	0	0	0	0	0	23	0	0	0	0	0	0	0	0	0	23	Fungi{superkingdom}(72);unidentified{phylum}(72);unidentified{class}(72);unidentified{order}(72);unidentified{family}(72);unidentified{genus}(72);unidentified{species}(72)	Fungi	unidentified	unidentified	unidentified	unidentified	unidentified	unidentified
ASV2783	0	0	0	0	0	0	0	0	23	0	0	0	0	0	0	0	0	23	Fungi{superkingdom}(100);Unassigned{phylum}(0);Unassigned{class}(0);Unassigned{order}(0);Unassigned{family}(0);Unassigned{genus}(0);Unassigned{species}(0)	Fungi	Unassigned	Unassigned	Unassigned	Unassigned	Unassigned	Unassigned
ASV2785	0	0	0	0	0	0	0	0	0	0	23	0	0	0	0	0	0	23	Fungi{superkingdom}(65);unidentified{phylum}(65);unidentified{class}(65);unidentified{order}(65);unidentified{family}(65);unidentified{genus}(65);unidentified{species}(65)	Fungi	unidentified	unidentified	unidentified	unidentified	unidentified	unidentified
ASV2786	0	0	0	0	0	0	0	0	0	0	0	23	0	0	0	0	0	23	Fungi{superkingdom}(70);unidentified{phylum}(70);unidentified{class}(70);unidentified{order}(70);unidentified{family}(70);unidentified{genus}(70);unidentified{species}(70)	Fungi	unidentified	unidentified	unidentified	unidentified	unidentified	unidentified
ASV2792	0	0	0	0	0	0	0	0	0	0	0	0	0	23	0	0	0	23	Fungi{superkingdom}(100);Unassigned{phylum}(0);Unassigned{class}(0);Unassigned{order}(0);Unassigned{family}(0);Unassigned{genus}(0);Unassigned{species}(0)	Fungi	Unassigned	Unassigned	Unassigned	Unassigned	Unassigned	Unassigned
ASV2793	0	0	0	0	0	0	0	0	0	0	0	0	0	0	23	0	0	23	Fungi{superkingdom}(100);Unassigned{phylum}(0);Unassigned{class}(0);Unassigned{order}(0);Unassigned{family}(0);Unassigned{genus}(0);Unassigned{species}(0)	Fungi	Unassigned	Unassigned	Unassigned	Unassigned	Unassigned	Unassigned
ASV2794	0	22	0	0	0	0	0	0	0	0	0	0	0	0	0	0	0	22	Fungi{superkingdom}(80);unidentified{phylum}(80);unidentified{class}(80);unidentified{order}(80);unidentified{family}(80);unidentified{genus}(80);unidentified{species}(80)	Fungi	unidentified	unidentified	unidentified	unidentified	unidentified	unidentified
ASV2795	0	0	22	0	0	0	0	0	0	0	0	0	0	0	0	0	0	22	Fungi{superkingdom}(79);Ascomycota{phylum}(79);unidentified{class}(79);unidentified{order}(79);unidentified{family}(79);unidentified{genus}(79);unidentified{species}(79)	Fungi	Ascomycota	unidentified	unidentified	unidentified	unidentified	unidentified
ASV2832	0	0	0	0	0	0	0	0	22	0	0	0	0	0	0	0	0	22	Fungi{superkingdom}(69);unidentified{phylum}(69);unidentified{class}(69);unidentified{order}(69);unidentified{family}(69);unidentified{genus}(69);unidentified{species}(69)	Fungi	unidentified	unidentified	unidentified	unidentified	unidentified	unidentified
ASV2834	0	0	0	0	0	0	0	0	0	0	22	0	0	0	0	0	0	22	Fungi{superkingdom}(90);Ascomycota{phylum}(90);Eurotiomycetes{class}(90);Eurotiales{order}(90);Aspergillaceae{family}(90);Unassigned{genus}(0);Unassigned{species}(0)	Fungi	Ascomycota	Eurotiomycetes	Eurotiales	Aspergillaceae	Unassigned	Unassigned
ASV2835	0	0	0	0	0	0	0	0	0	0	22	0	0	0	0	0	0	22	Fungi{superkingdom}(65);unidentified{phylum}(65);unidentified{class}(65);unidentified{order}(65);unidentified{family}(65);unidentified{genus}(65);unidentified{species}(65)	Fungi	unidentified	unidentified	unidentified	unidentified	unidentified	unidentified
ASV2836	0	0	0	0	0	0	0	0	0	0	22	0	0	0	0	0	0	22	Fungi{superkingdom}(69);Ascomycota{phylum}(69);Sordariomycetes{class}(69);Hypocreales{order}(69);Cordycipitaceae{family}(69);Simplicillium{genus}(69);Simplicillium_minatense{species}(69)	Fungi	Ascomycota	Sordariomycetes	Hypocreales	Cordycipitaceae	Simplicillium	Simplicillium_minatense
ASV2837	0	0	0	0	0	0	0	0	0	0	22	0	0	0	0	0	0	22	Fungi{superkingdom}(87);Ascomycota{phylum}(87);Dothideomycetes{class}(87);Pleosporales{order}(87);Cucurbitariaceae{family}(87);Unassigned{genus}(0);Unassigned{species}(0)	Fungi	Ascomycota	Dothideomycetes	Pleosporales	Cucurbitariaceae	Unassigned	Unassigned
ASV2850	0	0	0	0	0	0	0	0	0	0	0	0	0	22	0	0	0	22	Fungi{superkingdom}(63);unidentified{phylum}(63);unidentified{class}(63);unidentified{order}(63);unidentified{family}(63);unidentified{genus}(63);unidentified{species}(63)	Fungi	unidentified	unidentified	unidentified	unidentified	unidentified	unidentified
ASV2851	0	0	0	0	0	0	0	0	0	0	0	0	0	22	0	0	0	22	Fungi{superkingdom}(81);unidentified{phylum}(81);unidentified{class}(81);unidentified{order}(81);unidentified{family}(81);unidentified{genus}(81);unidentified{species}(81)	Fungi	unidentified	unidentified	unidentified	unidentified	unidentified	unidentified
ASV2852	0	0	0	0	0	0	0	0	0	0	0	0	0	0	0	0	22	22	Fungi{superkingdom}(65);unidentified{phylum}(65);unidentified{class}(65);unidentified{order}(65);unidentified{family}(65);unidentified{genus}(65);unidentified{species}(65)	Fungi	unidentified	unidentified	unidentified	unidentified	unidentified	unidentified
ASV2853	0	21	0	0	0	0	0	0	0	0	0	0	0	0	0	0	0	21	Fungi{superkingdom}(73);Basidiomycota{phylum}(73);Agaricomycetes{class}(73);Unassigned{order}(0);Unassigned{family}(0);Unassigned{genus}(0);Unassigned{species}(0)	Fungi	Basidiomycota	Agaricomycetes	Unassigned	Unassigned	Unassigned	Unassigned
ASV2854	0	0	0	0	0	3	0	0	0	0	0	0	0	0	0	0	0	3	Fungi{superkingdom}(73);Ascomycota{phylum}(73);Sordariomycetes{class}(73);Unassigned{order}(0);Unassigned{family}(0);Unassigned{genus}(0);Unassigned{species}(0)	Fungi	Ascomycota	Sordariomycetes	Unassigned	Unassigned	Unassigned	Unassigned
ASV2902	0	0	0	0	0	0	0	0	0	21	0	0	0	0	0	0	0	21	Fungi{superkingdom}(69);unidentified{phylum}(69);unidentified{class}(69);unidentified{order}(69);unidentified{family}(69);unidentified{genus}(69);unidentified{species}(69)	Fungi	unidentified	unidentified	unidentified	unidentified	unidentified	unidentified
ASV2904	0	0	0	0	0	0	0	0	0	0	0	21	0	0	0	0	0	21	Fungi{superkingdom}(73);unidentified{phylum}(73);unidentified{class}(73);unidentified{order}(73);unidentified{family}(73);unidentified{genus}(73);unidentified{species}(73)	Fungi	unidentified	unidentified	unidentified	unidentified	unidentified	unidentified
ASV2905	0	0	0	0	0	0	0	0	0	0	0	14	0	0	0	0	0	14	Fungi{superkingdom}(70);Ascomycota{phylum}(70);Pezizomycetes{class}(70);Pezizales{order}(70);Pezizaceae{family}(70);unidentified{genus}(70);unidentified{species}(70)	Fungi	Ascomycota	Pezizomycetes	Pezizales	Pezizaceae	unidentified	unidentified
ASV2912	0	0	0	0	0	0	0	0	0	0	0	0	0	0	0	21	0	21	Fungi{superkingdom}(95);Ascomycota{phylum}(95);Eurotiomycetes{class}(95);Chaetothyriales{order}(95);unidentified{family}(95);unidentified{genus}(95);unidentified{species}(95)	Fungi	Ascomycota	Eurotiomycetes	Chaetothyriales	unidentified	unidentified	unidentified
ASV2913	4	0	0	0	0	0	0	0	0	0	0	0	0	0	0	0	0	4	Fungi{superkingdom}(89);unidentified{phylum}(89);unidentified{class}(89);unidentified{order}(89);unidentified{family}(89);unidentified{genus}(89);unidentified{species}(89)	Fungi	unidentified	unidentified	unidentified	unidentified	unidentified	unidentified
ASV2942	0	0	0	0	0	0	0	20	0	0	0	0	0	0	0	0	0	20	Fungi{superkingdom}(89);Ascomycota{phylum}(89);Sordariomycetes{class}(89);unidentified{order}(89);unidentified{family}(89);unidentified{genus}(89);unidentified{species}(89)	Fungi	Ascomycota	Sordariomycetes	unidentified	unidentified	unidentified	unidentified
ASV2943	0	0	0	0	0	0	0	0	0	20	0	0	0	0	0	0	0	20	Fungi{superkingdom}(93);unidentified{phylum}(93);unidentified{class}(93);unidentified{order}(93);unidentified{family}(93);unidentified{genus}(93);unidentified{species}(93)	Fungi	unidentified	unidentified	unidentified	unidentified	unidentified	unidentified
ASV2944	0	0	0	0	0	0	0	0	0	20	0	0	0	0	0	0	0	20	Fungi{superkingdom}(100);Ascomycota{phylum}(100);Sordariomycetes{class}(100);Sordariales{order}(100);Chaetomiaceae{family}(100);Thielavia{genus}(100);Thielavia_basicola{species}(100)	Fungi	Ascomycota	Sordariomycetes	Sordariales	Chaetomiaceae	Thielavia	Thielavia_basicola
ASV2945	0	0	0	0	0	0	0	0	0	20	0	0	0	0	0	0	0	20	Fungi{superkingdom}(74);unidentified{phylum}(74);unidentified{class}(74);unidentified{order}(74);unidentified{family}(74);unidentified{genus}(74);unidentified{species}(74)	Fungi	unidentified	unidentified	unidentified	unidentified	unidentified	unidentified
ASV2946	0	0	0	0	0	0	0	0	0	20	0	0	0	0	0	0	0	20	Fungi{superkingdom}(89);unidentified{phylum}(89);unidentified{class}(89);unidentified{order}(89);unidentified{family}(89);unidentified{genus}(89);unidentified{species}(89)	Fungi	unidentified	unidentified	unidentified	unidentified	unidentified	unidentified
ASV2947	0	0	0	0	0	0	0	0	0	0	0	20	0	0	0	0	0	20	Fungi{superkingdom}(96);Ascomycota{phylum}(96);Sordariomycetes{class}(96);Sordariales{order}(96);Chaetomiaceae{family}(96);Unassigned{genus}(0);Unassigned{species}(0)	Fungi	Ascomycota	Sordariomycetes	Sordariales	Chaetomiaceae	Unassigned	Unassigned
ASV2953	0	0	0	0	0	0	0	0	0	0	0	0	0	0	20	0	0	20	Fungi{superkingdom}(100);Unassigned{phylum}(0);Unassigned{class}(0);Unassigned{order}(0);Unassigned{family}(0);Unassigned{genus}(0);Unassigned{species}(0)	Fungi	Unassigned	Unassigned	Unassigned	Unassigned	Unassigned	Unassigned
ASV2954	0	0	0	0	0	0	0	0	0	0	0	0	0	0	20	0	0	20	Fungi{superkingdom}(100);Unassigned{phylum}(0);Unassigned{class}(0);Unassigned{order}(0);Unassigned{family}(0);Unassigned{genus}(0);Unassigned{species}(0)	Fungi	Unassigned	Unassigned	Unassigned	Unassigned	Unassigned	Unassigned
ASV2955	0	0	0	0	0	0	0	0	0	0	0	0	0	0	20	0	0	20	Fungi{superkingdom}(100);Unassigned{phylum}(0);Unassigned{class}(0);Unassigned{order}(0);Unassigned{family}(0);Unassigned{genus}(0);Unassigned{species}(0)	Fungi	Unassigned	Unassigned	Unassigned	Unassigned	Unassigned	Unassigned
ASV2956	0	0	0	0	0	0	0	0	0	0	0	0	0	0	20	0	0	20	Fungi{superkingdom}(100);Unassigned{phylum}(0);Unassigned{class}(0);Unassigned{order}(0);Unassigned{family}(0);Unassigned{genus}(0);Unassigned{species}(0)	Fungi	Unassigned	Unassigned	Unassigned	Unassigned	Unassigned	Unassigned
ASV2957	0	0	0	0	0	0	0	0	0	0	0	0	0	0	0	0	20	20	Fungi{superkingdom}(100);Unassigned{phylum}(0);Unassigned{class}(0);Unassigned{order}(0);Unassigned{family}(0);Unassigned{genus}(0);Unassigned{species}(0)	Fungi	Unassigned	Unassigned	Unassigned	Unassigned	Unassigned	Unassigned
ASV2958	0	19	0	0	0	0	0	0	0	0	0	0	0	0	0	0	0	19	Fungi{superkingdom}(100);Ascomycota{phylum}(100);Sordariomycetes{class}(100);Sordariales{order}(100);Chaetomiaceae{family}(100);Thielavia{genus}(100);Thielavia_arenaria{species}(100)	Fungi	Ascomycota	Sordariomycetes	Sordariales	Chaetomiaceae	Thielavia	Thielavia_arenaria
ASV2959	0	19	0	0	0	0	0	0	0	0	0	0	0	0	0	0	0	19	Fungi{superkingdom}(100);Unassigned{phylum}(0);Unassigned{class}(0);Unassigned{order}(0);Unassigned{family}(0);Unassigned{genus}(0);Unassigned{species}(0)	Fungi	Unassigned	Unassigned	Unassigned	Unassigned	Unassigned	Unassigned
ASV2960	0	19	0	0	0	0	0	0	0	0	0	0	0	0	0	0	0	19	Fungi{superkingdom}(78);Basidiomycota{phylum}(78);Agaricomycetes{class}(78);unidentified{order}(78);unidentified{family}(78);unidentified{genus}(78);unidentified{species}(78)	Fungi	Basidiomycota	Agaricomycetes	unidentified	unidentified	unidentified	unidentified
ASV2961	0	19	0	0	0	0	0	0	0	0	0	0	0	0	0	0	0	19	Fungi{superkingdom}(69);unidentified{phylum}(69);unidentified{class}(69);unidentified{order}(69);unidentified{family}(69);unidentified{genus}(69);unidentified{species}(69)	Fungi	unidentified	unidentified	unidentified	unidentified	unidentified	unidentified
ASV2962	0	19	0	0	0	0	0	0	0	0	0	0	0	0	0	0	0	19	Fungi{superkingdom}(100);Ascomycota{phylum}(100);Dothideomycetes{class}(100);Pleosporales{order}(100);Phaeosphaeriaceae{family}(100);Paraphoma{genus}(100);Unassigned{species}(0)	Fungi	Ascomycota	Dothideomycetes	Pleosporales	Phaeosphaeriaceae	Paraphoma	Unassigned
ASV2963	0	12	0	0	0	0	0	0	0	0	0	0	0	0	0	0	0	12	Fungi{superkingdom}(94);Ascomycota{phylum}(94);Unassigned{class}(0);Unassigned{order}(0);Unassigned{family}(0);Unassigned{genus}(0);Unassigned{species}(0)	Fungi	Ascomycota	Unassigned	Unassigned	Unassigned	Unassigned	Unassigned
ASV2964	0	7	0	0	0	0	0	0	0	0	0	0	0	0	0	0	0	7	Fungi{superkingdom}(90);unidentified{phylum}(90);unidentified{class}(90);unidentified{order}(90);unidentified{family}(90);unidentified{genus}(90);unidentified{species}(90)	Fungi	unidentified	unidentified	unidentified	unidentified	unidentified	unidentified
ASV2965	0	3	0	0	0	0	0	0	0	0	0	0	0	0	0	0	0	3	Fungi{superkingdom}(89);Ascomycota{phylum}(89);Dothideomycetes{class}(89);Pleosporales{order}(89);Phaeosphaeriaceae{family}(89);unidentified{genus}(89);unidentified{species}(89)	Fungi	Ascomycota	Dothideomycetes	Pleosporales	Phaeosphaeriaceae	unidentified	unidentified
ASV2984	0	0	0	0	0	0	0	0	0	0	0	17	0	0	0	0	0	17	Fungi{superkingdom}(74);Ascomycota{phylum}(74);Sordariomycetes{class}(74);Sordariales{order}(74);Lasiosphaeriaceae{family}(74);Schizothecium{genus}(74);Schizothecium_miniglutinans{species}(74)	Fungi	Ascomycota	Sordariomycetes	Sordariales	Lasiosphaeriaceae	Schizothecium	Schizothecium_miniglutinans
ASV3009	0	0	0	0	0	0	0	0	0	0	0	0	0	0	0	0	10	10	Fungi{superkingdom}(87);unidentified{phylum}(87);unidentified{class}(87);unidentified{order}(87);unidentified{family}(87);unidentified{genus}(87);unidentified{species}(87)	Fungi	unidentified	unidentified	unidentified	unidentified	unidentified	unidentified
ASV3011	0	0	0	0	0	0	19	0	0	0	0	0	0	0	0	0	0	19	Fungi{superkingdom}(67);Ascomycota{phylum}(67);Dothideomycetes{class}(67);Pleosporales{order}(67);Lophiostomataceae{family}(67);Lophiostoma{genus}(67);Lophiostoma_rosae{species}(67)	Fungi	Ascomycota	Dothideomycetes	Pleosporales	Lophiostomataceae	Lophiostoma	Lophiostoma_rosae
ASV3012	0	0	0	0	0	0	19	0	0	0	0	0	0	0	0	0	0	19	Fungi{superkingdom}(88);Ascomycota{phylum}(88);Dothideomycetes{class}(88);Pleosporales{order}(88);Pleosporales_fam_Incertae_sedis{family}(88);Thyrostroma{genus}(88);Thyrostroma_cornicola{species}(88)	Fungi	Ascomycota	Dothideomycetes	Pleosporales	Pleosporales_fam_Incertae_sedis	Thyrostroma	Thyrostroma_cornicola
ASV3013	0	0	0	0	0	0	0	0	0	19	0	0	0	0	0	0	0	19	Fungi{superkingdom}(95);unidentified{phylum}(95);unidentified{class}(95);unidentified{order}(95);unidentified{family}(95);unidentified{genus}(95);unidentified{species}(95)	Fungi	unidentified	unidentified	unidentified	unidentified	unidentified	unidentified
ASV3014	0	0	0	0	0	0	0	0	0	0	0	19	0	0	0	0	0	19	Fungi{superkingdom}(80);unidentified{phylum}(80);unidentified{class}(80);unidentified{order}(80);unidentified{family}(80);unidentified{genus}(80);unidentified{species}(80)	Fungi	unidentified	unidentified	unidentified	unidentified	unidentified	unidentified
ASV3022	0	0	0	0	0	0	0	0	0	0	0	0	0	0	19	0	0	19	Fungi{superkingdom}(71);Ascomycota{phylum}(71);Saccharomycetes{class}(71);Saccharomycetales{order}(71);unidentified{family}(71);unidentified{genus}(71);unidentified{species}(71)	Fungi	Ascomycota	Saccharomycetes	Saccharomycetales	unidentified	unidentified	unidentified
ASV3023	0	0	0	0	0	0	0	0	0	0	0	0	0	0	0	0	19	19	Fungi{superkingdom}(74);unidentified{phylum}(74);unidentified{class}(74);unidentified{order}(74);unidentified{family}(74);unidentified{genus}(74);unidentified{species}(74)	Fungi	unidentified	unidentified	unidentified	unidentified	unidentified	unidentified
ASV3024	0	18	0	0	0	0	0	0	0	0	0	0	0	0	0	0	0	18	Fungi{superkingdom}(94);Ascomycota{phylum}(94);Leotiomycetes{class}(94);Helotiales{order}(94);Helotiales_fam_Incertae_sedis{family}(94);Cadophora{genus}(94);Cadophora_luteo-olivacea{species}(94)	Fungi	Ascomycota	Leotiomycetes	Helotiales	Helotiales_fam_Incertae_sedis	Cadophora	Cadophora_luteo-olivacea
ASV3025	0	18	0	0	0	0	0	0	0	0	0	0	0	0	0	0	0	18	Fungi{superkingdom}(90);unidentified{phylum}(90);unidentified{class}(90);unidentified{order}(90);unidentified{family}(90);unidentified{genus}(90);unidentified{species}(90)	Fungi	unidentified	unidentified	unidentified	unidentified	unidentified	unidentified
ASV3026	0	8	8	0	0	0	0	0	0	0	0	0	0	0	0	0	0	16	Fungi{superkingdom}(81);Ascomycota{phylum}(81);Sordariomycetes{class}(81);Hypocreales{order}(81);Unassigned{family}(0);Unassigned{genus}(0);Unassigned{species}(0)	Fungi	Ascomycota	Sordariomycetes	Hypocreales	Unassigned	Unassigned	Unassigned
ASV3027	0	0	8	0	0	0	0	0	0	0	0	0	0	0	0	0	0	8	Fungi{superkingdom}(73);unidentified{phylum}(73);unidentified{class}(73);unidentified{order}(73);unidentified{family}(73);unidentified{genus}(73);unidentified{species}(73)	Fungi	unidentified	unidentified	unidentified	unidentified	unidentified	unidentified
ASV3028	0	0	0	0	18	0	0	0	0	0	0	0	0	0	0	0	0	18	Fungi{superkingdom}(99);Ascomycota{phylum}(99);Sordariomycetes{class}(99);Sordariales{order}(99);Chaetomiaceae{family}(99);Humicola{genus}(99);Unassigned{species}(0)	Fungi	Ascomycota	Sordariomycetes	Sordariales	Chaetomiaceae	Humicola	Unassigned
ASV3029	0	0	0	0	0	18	0	0	0	0	0	0	0	0	0	0	0	18	Fungi{superkingdom}(98);Ascomycota{phylum}(98);Eurotiomycetes{class}(98);Eurotiales{order}(98);Aspergillaceae{family}(98);Aspergillus{genus}(98);Aspergillus_pseudodeflectus{species}(98)	Fungi	Ascomycota	Eurotiomycetes	Eurotiales	Aspergillaceae	Aspergillus	Aspergillus_pseudodeflectus
ASV3031	0	0	0	0	0	0	0	0	0	0	7	0	0	0	0	0	0	7	Fungi{superkingdom}(100);Ascomycota{phylum}(100);Dothideomycetes{class}(100);Pleosporales{order}(100);Sporormiaceae{family}(100);Sporormia{genus}(100);unidentified{species}(100)	Fungi	Ascomycota	Dothideomycetes	Pleosporales	Sporormiaceae	Sporormia	unidentified
ASV3056	0	0	0	0	0	0	0	0	0	0	0	0	0	0	0	8	0	8	Fungi{superkingdom}(72);unidentified{phylum}(72);unidentified{class}(72);unidentified{order}(72);unidentified{family}(72);unidentified{genus}(72);unidentified{species}(72)	Fungi	unidentified	unidentified	unidentified	unidentified	unidentified	unidentified
ASV3085	0	0	0	0	0	0	18	0	0	0	0	0	0	0	0	0	0	18	Fungi{superkingdom}(62);unidentified{phylum}(62);unidentified{class}(62);unidentified{order}(62);unidentified{family}(62);unidentified{genus}(62);unidentified{species}(62)	Fungi	unidentified	unidentified	unidentified	unidentified	unidentified	unidentified
ASV3086	0	0	0	0	0	0	0	18	0	0	0	0	0	0	0	0	0	18	Fungi{superkingdom}(63);unidentified{phylum}(63);unidentified{class}(63);unidentified{order}(63);unidentified{family}(63);unidentified{genus}(63);unidentified{species}(63)	Fungi	unidentified	unidentified	unidentified	unidentified	unidentified	unidentified
ASV3087	0	0	0	0	0	0	0	0	0	18	0	0	0	0	0	0	0	18	Fungi{superkingdom}(100);Unassigned{phylum}(0);Unassigned{class}(0);Unassigned{order}(0);Unassigned{family}(0);Unassigned{genus}(0);Unassigned{species}(0)	Fungi	Unassigned	Unassigned	Unassigned	Unassigned	Unassigned	Unassigned
ASV3088	0	0	0	0	0	0	0	0	0	0	18	0	0	0	0	0	0	18	Fungi{superkingdom}(90);Basidiomycota{phylum}(90);Unassigned{class}(0);Unassigned{order}(0);Unassigned{family}(0);Unassigned{genus}(0);Unassigned{species}(0)	Fungi	Basidiomycota	Unassigned	Unassigned	Unassigned	Unassigned	Unassigned
ASV3104	0	0	0	0	0	0	0	0	0	0	0	0	0	18	0	0	0	18	Fungi{superkingdom}(75);Chytridiomycota{phylum}(75);unidentified{class}(75);unidentified{order}(75);unidentified{family}(75);unidentified{genus}(75);unidentified{species}(75)	Fungi	Chytridiomycota	unidentified	unidentified	unidentified	unidentified	unidentified
ASV3105	0	0	0	0	0	0	0	0	0	0	0	0	0	0	18	0	0	18	Fungi{superkingdom}(100);Unassigned{phylum}(0);Unassigned{class}(0);Unassigned{order}(0);Unassigned{family}(0);Unassigned{genus}(0);Unassigned{species}(0)	Fungi	Unassigned	Unassigned	Unassigned	Unassigned	Unassigned	Unassigned
ASV3106	0	0	0	0	0	0	0	0	0	0	0	0	0	0	0	18	0	18	Fungi{superkingdom}(96);Ascomycota{phylum}(96);Sordariomycetes{class}(96);Glomerellales{order}(96);Plectosphaerellaceae{family}(96);Verticillium{genus}(96);Verticillium_leptobactrum{species}(96)	Fungi	Ascomycota	Sordariomycetes	Glomerellales	Plectosphaerellaceae	Verticillium	Verticillium_leptobactrum
ASV3107	0	0	0	0	0	0	0	0	0	0	0	0	0	0	0	18	0	18	Fungi{superkingdom}(61);Ascomycota{phylum}(61);Dothideomycetes{class}(61);Pleosporales{order}(61);Cucurbitariaceae{family}(61);Pyrenochaetopsis{genus}(61);Pyrenochaetopsis_leptospora{species}(61)	Fungi	Ascomycota	Dothideomycetes	Pleosporales	Cucurbitariaceae	Pyrenochaetopsis	Pyrenochaetopsis_leptospora
ASV3108	0	17	0	0	0	0	0	0	0	0	0	0	0	0	0	0	0	17	Fungi{superkingdom}(81);unidentified{phylum}(81);unidentified{class}(81);unidentified{order}(81);unidentified{family}(81);unidentified{genus}(81);unidentified{species}(81)	Fungi	unidentified	unidentified	unidentified	unidentified	unidentified	unidentified
ASV3109	0	17	0	0	0	0	0	0	0	0	0	0	0	0	0	0	0	17	Fungi{superkingdom}(85);Ascomycota{phylum}(85);Dothideomycetes{class}(85);Pleosporales{order}(85);Camarosporidiellaceae{family}(85);Camarosporidiella{genus}(85);Camarosporidiella_mackenziei{species}(85)	Fungi	Ascomycota	Dothideomycetes	Pleosporales	Camarosporidiellaceae	Camarosporidiella	Camarosporidiella_mackenziei
ASV3110	0	17	0	0	0	0	0	0	0	0	0	0	0	0	0	0	0	17	Fungi{superkingdom}(100);Unassigned{phylum}(0);Unassigned{class}(0);Unassigned{order}(0);Unassigned{family}(0);Unassigned{genus}(0);Unassigned{species}(0)	Fungi	Unassigned	Unassigned	Unassigned	Unassigned	Unassigned	Unassigned
ASV3111	0	0	17	0	0	0	0	0	0	0	0	0	0	0	0	0	0	17	Fungi{superkingdom}(96);unidentified{phylum}(96);unidentified{class}(96);unidentified{order}(96);unidentified{family}(96);unidentified{genus}(96);unidentified{species}(96)	Fungi	unidentified	unidentified	unidentified	unidentified	unidentified	unidentified
ASV3112	0	0	17	0	0	0	0	0	0	0	0	0	0	0	0	0	0	17	Fungi{superkingdom}(64);Ascomycota{phylum}(64);Pezizomycetes{class}(64);Pezizales{order}(64);Pezizaceae{family}(64);Iodophanus{genus}(64);Unassigned{species}(0)	Fungi	Ascomycota	Pezizomycetes	Pezizales	Pezizaceae	Iodophanus	Unassigned
ASV3113	0	0	0	17	0	0	0	0	0	0	0	0	0	0	0	0	0	17	Fungi{superkingdom}(63);Basidiomycota{phylum}(63);Tremellomycetes{class}(63);Tremellales{order}(63);Cryptococcaceae{family}(63);Kwoniella{genus}(63);Kwoniella_betulae{species}(63)	Fungi	Basidiomycota	Tremellomycetes	Tremellales	Cryptococcaceae	Kwoniella	Kwoniella_betulae
ASV3121	0	0	0	0	0	0	0	0	0	0	0	0	0	10	0	0	0	10	Fungi{superkingdom}(87);unidentified{phylum}(87);unidentified{class}(87);unidentified{order}(87);unidentified{family}(87);unidentified{genus}(87);unidentified{species}(87)	Fungi	unidentified	unidentified	unidentified	unidentified	unidentified	unidentified
ASV3159	0	0	0	0	0	0	0	0	0	17	0	0	0	0	0	0	0	17	Fungi{superkingdom}(91);Ascomycota{phylum}(91);Sordariomycetes{class}(91);Unassigned{order}(0);Unassigned{family}(0);Unassigned{genus}(0);Unassigned{species}(0)	Fungi	Ascomycota	Sordariomycetes	Unassigned	Unassigned	Unassigned	Unassigned
ASV3160	0	0	0	0	0	0	0	0	0	17	0	0	0	0	0	0	0	17	Fungi{superkingdom}(88);unidentified{phylum}(88);unidentified{class}(88);unidentified{order}(88);unidentified{family}(88);unidentified{genus}(88);unidentified{species}(88)	Fungi	unidentified	unidentified	unidentified	unidentified	unidentified	unidentified
ASV3162	0	0	0	0	0	0	0	0	0	0	0	17	0	0	0	0	0	17	Fungi{superkingdom}(100);Chytridiomycota{phylum}(100);Rhizophlyctidomycetes{class}(100);Rhizophlyctidales{order}(100);Rhizophlyctidaceae{family}(100);Rhizophlyctis{genus}(100);Rhizophlyctis_rosea{species}(100)	Fungi	Chytridiomycota	Rhizophlyctidomycetes	Rhizophlyctidales	Rhizophlyctidaceae	Rhizophlyctis	Rhizophlyctis_rosea
ASV3163	0	0	0	0	0	0	0	0	0	0	0	17	0	0	0	0	0	17	Fungi{superkingdom}(93);Ascomycota{phylum}(93);Eurotiomycetes{class}(93);Chaetothyriales{order}(93);unidentified{family}(93);unidentified{genus}(93);unidentified{species}(93)	Fungi	Ascomycota	Eurotiomycetes	Chaetothyriales	unidentified	unidentified	unidentified
ASV3178	0	0	0	0	0	0	0	0	0	0	0	0	17	0	0	0	0	17	Fungi{superkingdom}(65);unidentified{phylum}(65);unidentified{class}(65);unidentified{order}(65);unidentified{family}(65);unidentified{genus}(65);unidentified{species}(65)	Fungi	unidentified	unidentified	unidentified	unidentified	unidentified	unidentified
ASV3179	0	0	0	0	0	0	0	0	0	0	0	0	0	0	0	17	0	17	Fungi{superkingdom}(76);unidentified{phylum}(76);unidentified{class}(76);unidentified{order}(76);unidentified{family}(76);unidentified{genus}(76);unidentified{species}(76)	Fungi	unidentified	unidentified	unidentified	unidentified	unidentified	unidentified
ASV3180	0	0	16	0	0	0	0	0	0	0	0	0	0	0	0	0	0	16	Fungi{superkingdom}(94);Ascomycota{phylum}(94);Sordariomycetes{class}(94);Unassigned{order}(0);Unassigned{family}(0);Unassigned{genus}(0);Unassigned{species}(0)	Fungi	Ascomycota	Sordariomycetes	Unassigned	Unassigned	Unassigned	Unassigned
ASV3181	0	0	16	0	0	0	0	0	0	0	0	0	0	0	0	0	0	16	Fungi{superkingdom}(100);Ascomycota{phylum}(100);Leotiomycetes{class}(100);Helotiales{order}(100);Helotiales_fam_Incertae_sedis{family}(100);Xylogone{genus}(100);unidentified{species}(100)	Fungi	Ascomycota	Leotiomycetes	Helotiales	Helotiales_fam_Incertae_sedis	Xylogone	unidentified
ASV3182	0	0	0	9	0	0	0	0	0	0	0	0	0	0	0	0	0	9	Fungi{superkingdom}(100);Basidiomycota{phylum}(100);Agaricomycetes{class}(100);Agaricales{order}(100);Entolomataceae{family}(100);Entoloma{genus}(100);Unassigned{species}(0)	Fungi	Basidiomycota	Agaricomycetes	Agaricales	Entolomataceae	Entoloma	Unassigned
ASV3183	0	0	0	4	0	0	0	0	0	0	0	0	0	0	0	0	0	4	Fungi{superkingdom}(79);Ascomycota{phylum}(79);Dothideomycetes{class}(79);Capnodiales{order}(79);Cladosporiaceae{family}(79);Rachicladosporium{genus}(79);Rachicladosporium_cboliae{species}(79)	Fungi	Ascomycota	Dothideomycetes	Capnodiales	Cladosporiaceae	Rachicladosporium	Rachicladosporium_cboliae
ASV3184	0	0	0	0	16	0	0	0	0	0	0	0	0	0	0	0	0	16	Fungi{superkingdom}(100);Ascomycota{phylum}(100);Dothideomycetes{class}(100);Pleosporales{order}(100);Didymosphaeriaceae{family}(100);Kalmusia{genus}(100);unidentified{species}(100)	Fungi	Ascomycota	Dothideomycetes	Pleosporales	Didymosphaeriaceae	Kalmusia	unidentified
ASV3226	0	0	0	0	0	0	0	0	0	0	0	16	0	0	0	0	0	16	Fungi{superkingdom}(93);unidentified{phylum}(93);unidentified{class}(93);unidentified{order}(93);unidentified{family}(93);unidentified{genus}(93);unidentified{species}(93)	Fungi	unidentified	unidentified	unidentified	unidentified	unidentified	unidentified
ASV3227	0	0	0	0	0	0	0	0	0	0	0	16	0	0	0	0	0	16	Fungi{superkingdom}(61);Ascomycota{phylum}(61);Dothideomycetes{class}(61);Pleosporales{order}(61);Unassigned{family}(0);Unassigned{genus}(0);Unassigned{species}(0)	Fungi	Ascomycota	Dothideomycetes	Pleosporales	Unassigned	Unassigned	Unassigned
ASV3228	0	0	0	0	0	0	0	0	0	0	0	16	0	0	0	0	0	16	Fungi{superkingdom}(72);unidentified{phylum}(72);unidentified{class}(72);unidentified{order}(72);unidentified{family}(72);unidentified{genus}(72);unidentified{species}(72)	Fungi	unidentified	unidentified	unidentified	unidentified	unidentified	unidentified
ASV3242	0	0	0	0	0	0	0	0	0	0	0	0	0	0	0	16	0	16	Fungi{superkingdom}(71);Ascomycota{phylum}(71);Eurotiomycetes{class}(71);Chaetothyriales{order}(71);Trichomeriaceae{family}(71);Knufia{genus}(71);Knufia_mediterranea{species}(71)	Fungi	Ascomycota	Eurotiomycetes	Chaetothyriales	Trichomeriaceae	Knufia	Knufia_mediterranea
ASV3243	0	0	0	0	0	0	0	0	0	0	0	0	0	0	0	16	0	16	Fungi{superkingdom}(100);Unassigned{phylum}(0);Unassigned{class}(0);Unassigned{order}(0);Unassigned{family}(0);Unassigned{genus}(0);Unassigned{species}(0)	Fungi	Unassigned	Unassigned	Unassigned	Unassigned	Unassigned	Unassigned
ASV3244	0	0	0	0	0	0	0	0	0	0	0	0	0	0	0	16	0	16	Fungi{superkingdom}(100);Unassigned{phylum}(0);Unassigned{class}(0);Unassigned{order}(0);Unassigned{family}(0);Unassigned{genus}(0);Unassigned{species}(0)	Fungi	Unassigned	Unassigned	Unassigned	Unassigned	Unassigned	Unassigned
ASV3245	0	15	0	0	0	0	0	0	0	0	0	0	0	0	0	0	0	15	Fungi{superkingdom}(71);unidentified{phylum}(71);unidentified{class}(71);unidentified{order}(71);unidentified{family}(71);unidentified{genus}(71);unidentified{species}(71)	Fungi	unidentified	unidentified	unidentified	unidentified	unidentified	unidentified
ASV3246	0	15	0	0	0	0	0	0	0	0	0	0	0	0	0	0	0	15	Fungi{superkingdom}(88);Ascomycota{phylum}(88);Eurotiomycetes{class}(88);Chaetothyriales{order}(88);Herpotrichiellaceae{family}(88);Coniosporium{genus}(88);unidentified{species}(88)	Fungi	Ascomycota	Eurotiomycetes	Chaetothyriales	Herpotrichiellaceae	Coniosporium	unidentified
ASV3292	0	0	0	0	0	0	0	0	0	0	0	0	0	0	0	6	0	6	Fungi{superkingdom}(93);Basidiomycota{phylum}(93);Agaricomycetes{class}(93);Trechisporales{order}(93);Hydnodontaceae{family}(93);Subulicystidium{genus}(93);Subulicystidium_perlongisporum{species}(93)	Fungi	Basidiomycota	Agaricomycetes	Trechisporales	Hydnodontaceae	Subulicystidium	Subulicystidium_perlongisporum
ASV3303	0	0	0	0	0	0	0	15	0	0	0	0	0	0	0	0	0	15	Fungi{superkingdom}(100);Unassigned{phylum}(0);Unassigned{class}(0);Unassigned{order}(0);Unassigned{family}(0);Unassigned{genus}(0);Unassigned{species}(0)	Fungi	Unassigned	Unassigned	Unassigned	Unassigned	Unassigned	Unassigned
ASV3304	0	0	0	0	0	0	0	0	15	0	0	0	0	0	0	0	0	15	Fungi{superkingdom}(96);unidentified{phylum}(96);unidentified{class}(96);unidentified{order}(96);unidentified{family}(96);unidentified{genus}(96);unidentified{species}(96)	Fungi	unidentified	unidentified	unidentified	unidentified	unidentified	unidentified
ASV3306	0	0	0	0	0	0	0	0	0	0	0	15	0	0	0	0	0	15	Fungi{superkingdom}(98);unidentified{phylum}(98);unidentified{class}(98);unidentified{order}(98);unidentified{family}(98);unidentified{genus}(98);unidentified{species}(98)	Fungi	unidentified	unidentified	unidentified	unidentified	unidentified	unidentified
ASV3307	0	0	0	0	0	0	0	0	0	0	0	15	0	0	0	0	0	15	Fungi{superkingdom}(100);Unassigned{phylum}(0);Unassigned{class}(0);Unassigned{order}(0);Unassigned{family}(0);Unassigned{genus}(0);Unassigned{species}(0)	Fungi	Unassigned	Unassigned	Unassigned	Unassigned	Unassigned	Unassigned
ASV3321	0	0	0	0	0	0	0	0	0	0	0	0	0	0	15	0	0	15	Fungi{superkingdom}(99);unidentified{phylum}(99);unidentified{class}(99);unidentified{order}(99);unidentified{family}(99);unidentified{genus}(99);unidentified{species}(99)	Fungi	unidentified	unidentified	unidentified	unidentified	unidentified	unidentified
ASV3322	0	0	0	0	0	0	0	0	0	0	0	0	0	0	0	15	0	15	Fungi{superkingdom}(100);Basidiomycota{phylum}(100);Agaricostilbomycetes{class}(100);Agaricostilbales{order}(100);Chionosphaeraceae{family}(100);Kurtzmanomyces{genus}(100);Kurtzmanomyces_shapotouensis{species}(100)	Fungi	Basidiomycota	Agaricostilbomycetes	Agaricostilbales	Chionosphaeraceae	Kurtzmanomyces	Kurtzmanomyces_shapotouensis
ASV3323	0	0	0	0	0	0	0	0	0	0	0	0	0	0	0	0	15	15	Fungi{superkingdom}(91);unidentified{phylum}(91);unidentified{class}(91);unidentified{order}(91);unidentified{family}(91);unidentified{genus}(91);unidentified{species}(91)	Fungi	unidentified	unidentified	unidentified	unidentified	unidentified	unidentified
ASV3324	0	0	0	0	0	0	0	0	0	0	0	0	0	0	0	0	15	15	Fungi{superkingdom}(70);unidentified{phylum}(70);unidentified{class}(70);unidentified{order}(70);unidentified{family}(70);unidentified{genus}(70);unidentified{species}(70)	Fungi	unidentified	unidentified	unidentified	unidentified	unidentified	unidentified
ASV3325	14	0	0	0	0	0	0	0	0	0	0	0	0	0	0	0	0	14	Fungi{superkingdom}(100);Unassigned{phylum}(0);Unassigned{class}(0);Unassigned{order}(0);Unassigned{family}(0);Unassigned{genus}(0);Unassigned{species}(0)	Fungi	Unassigned	Unassigned	Unassigned	Unassigned	Unassigned	Unassigned
ASV3326	0	14	0	0	0	0	0	0	0	0	0	0	0	0	0	0	0	14	Fungi{superkingdom}(80);unidentified{phylum}(80);unidentified{class}(80);unidentified{order}(80);unidentified{family}(80);unidentified{genus}(80);unidentified{species}(80)	Fungi	unidentified	unidentified	unidentified	unidentified	unidentified	unidentified
ASV3327	0	14	0	0	0	0	0	0	0	0	0	0	0	0	0	0	0	14	Fungi{superkingdom}(100);Ascomycota{phylum}(100);Eurotiomycetes{class}(100);Chaetothyriales{order}(100);Herpotrichiellaceae{family}(100);Exophiala{genus}(100);Exophiala_lacus{species}(100)	Fungi	Ascomycota	Eurotiomycetes	Chaetothyriales	Herpotrichiellaceae	Exophiala	Exophiala_lacus
ASV3328	0	14	0	0	0	0	0	0	0	0	0	0	0	0	0	0	0	14	Fungi{superkingdom}(93);unidentified{phylum}(93);unidentified{class}(93);unidentified{order}(93);unidentified{family}(93);unidentified{genus}(93);unidentified{species}(93)	Fungi	unidentified	unidentified	unidentified	unidentified	unidentified	unidentified
ASV3329	0	14	0	0	0	0	0	0	0	0	0	0	0	0	0	0	0	14	Fungi{superkingdom}(88);Ascomycota{phylum}(88);Leotiomycetes{class}(88);Helotiales{order}(88);Unassigned{family}(0);Unassigned{genus}(0);Unassigned{species}(0)	Fungi	Ascomycota	Leotiomycetes	Helotiales	Unassigned	Unassigned	Unassigned
ASV3330	0	0	14	0	0	0	0	0	0	0	0	0	0	0	0	0	0	14	Fungi{superkingdom}(82);Ascomycota{phylum}(82);Dothideomycetes{class}(82);Pleosporales{order}(82);Pleosporaceae{family}(82);Drechslera{genus}(82);Drechslera_dematioidea{species}(82)	Fungi	Ascomycota	Dothideomycetes	Pleosporales	Pleosporaceae	Drechslera	Drechslera_dematioidea
ASV3331	0	0	14	0	0	0	0	0	0	0	0	0	0	0	0	0	0	14	Fungi{superkingdom}(83);Basidiomycota{phylum}(83);Agaricomycetes{class}(83);Agaricales{order}(83);Agaricaceae{family}(83);Leucoagaricus{genus}(83);unidentified{species}(83)	Fungi	Basidiomycota	Agaricomycetes	Agaricales	Agaricaceae	Leucoagaricus	unidentified
ASV3332	0	0	0	0	14	0	0	0	0	0	0	0	0	0	0	0	0	14	Fungi{superkingdom}(93);Basidiomycota{phylum}(93);Agaricomycetes{class}(93);Agaricales{order}(93);unidentified{family}(93);unidentified{genus}(93);unidentified{species}(93)	Fungi	Basidiomycota	Agaricomycetes	Agaricales	unidentified	unidentified	unidentified
ASV3333	0	0	0	0	14	0	0	0	0	0	0	0	0	0	0	0	0	14	Fungi{superkingdom}(100);Unassigned{phylum}(0);Unassigned{class}(0);Unassigned{order}(0);Unassigned{family}(0);Unassigned{genus}(0);Unassigned{species}(0)	Fungi	Unassigned	Unassigned	Unassigned	Unassigned	Unassigned	Unassigned
ASV3334	0	0	0	0	0	14	0	0	0	0	0	0	0	0	0	0	0	14	Fungi{superkingdom}(81);Ascomycota{phylum}(81);Sordariomycetes{class}(81);Hypocreales{order}(81);Bionectriaceae{family}(81);Clonostachys{genus}(81);Clonostachys_rosea{species}(81)	Fungi	Ascomycota	Sordariomycetes	Hypocreales	Bionectriaceae	Clonostachys	Clonostachys_rosea
ASV3385	0	0	0	0	0	0	0	0	14	0	0	0	0	0	0	0	0	14	Fungi{superkingdom}(100);Basidiomycota{phylum}(100);Agaricomycetes{class}(100);Trechisporales{order}(100);Trechisporales_fam_Incertae_sedis{family}(100);Sistotremastrum{genus}(100);Sistotremastrum_guttuliferum{species}(100)	Fungi	Basidiomycota	Agaricomycetes	Trechisporales	Trechisporales_fam_Incertae_sedis	Sistotremastrum	Sistotremastrum_guttuliferum
ASV3386	0	0	0	0	0	0	0	0	0	10	0	0	0	0	0	0	0	10	Fungi{superkingdom}(100);Ascomycota{phylum}(100);Dothideomycetes{class}(100);Pleosporales{order}(100);Morosphaeriaceae{family}(100);Acrocalymma{genus}(100);unidentified{species}(100)	Fungi	Ascomycota	Dothideomycetes	Pleosporales	Morosphaeriaceae	Acrocalymma	unidentified
ASV3388	0	0	0	0	0	0	0	0	0	0	14	0	0	0	0	0	0	14	Fungi{superkingdom}(100);Unassigned{phylum}(0);Unassigned{class}(0);Unassigned{order}(0);Unassigned{family}(0);Unassigned{genus}(0);Unassigned{species}(0)	Fungi	Unassigned	Unassigned	Unassigned	Unassigned	Unassigned	Unassigned
ASV3389	0	0	0	0	0	0	0	0	0	0	14	0	0	0	0	0	0	14	Fungi{superkingdom}(100);Unassigned{phylum}(0);Unassigned{class}(0);Unassigned{order}(0);Unassigned{family}(0);Unassigned{genus}(0);Unassigned{species}(0)	Fungi	Unassigned	Unassigned	Unassigned	Unassigned	Unassigned	Unassigned
ASV3390	0	0	0	0	0	0	0	0	0	0	0	14	0	0	0	0	0	14	Fungi{superkingdom}(73);unidentified{phylum}(73);unidentified{class}(73);unidentified{order}(73);unidentified{family}(73);unidentified{genus}(73);unidentified{species}(73)	Fungi	unidentified	unidentified	unidentified	unidentified	unidentified	unidentified
ASV3397	0	0	0	0	0	0	0	0	0	0	0	0	0	0	0	0	12	12	Fungi{superkingdom}(97);unidentified{phylum}(97);unidentified{class}(97);unidentified{order}(97);unidentified{family}(97);unidentified{genus}(97);unidentified{species}(97)	Fungi	unidentified	unidentified	unidentified	unidentified	unidentified	unidentified
ASV3408	0	0	0	0	0	0	0	0	0	0	0	0	0	14	0	0	0	14	Fungi{superkingdom}(83);unidentified{phylum}(83);unidentified{class}(83);unidentified{order}(83);unidentified{family}(83);unidentified{genus}(83);unidentified{species}(83)	Fungi	unidentified	unidentified	unidentified	unidentified	unidentified	unidentified
ASV3409	0	0	0	0	0	0	0	0	0	0	0	0	0	0	0	14	0	14	Fungi{superkingdom}(100);Unassigned{phylum}(0);Unassigned{class}(0);Unassigned{order}(0);Unassigned{family}(0);Unassigned{genus}(0);Unassigned{species}(0)	Fungi	Unassigned	Unassigned	Unassigned	Unassigned	Unassigned	Unassigned
ASV3410	0	0	0	0	0	0	0	0	0	0	0	0	0	0	0	14	0	14	Fungi{superkingdom}(82);Basidiomycota{phylum}(82);Agaricomycetes{class}(82);Unassigned{order}(0);Unassigned{family}(0);Unassigned{genus}(0);Unassigned{species}(0)	Fungi	Basidiomycota	Agaricomycetes	Unassigned	Unassigned	Unassigned	Unassigned
ASV3411	0	0	0	0	0	0	0	0	0	0	0	0	0	0	0	0	14	14	Fungi{superkingdom}(69);Ascomycota{phylum}(69);Dothideomycetes{class}(69);Pleosporales{order}(69);Phaeosphaeriaceae{family}(69);Unassigned{genus}(0);Unassigned{species}(0)	Fungi	Ascomycota	Dothideomycetes	Pleosporales	Phaeosphaeriaceae	Unassigned	Unassigned
ASV3412	13	0	0	0	0	0	0	0	0	0	0	0	0	0	0	0	0	13	Fungi{superkingdom}(100);Unassigned{phylum}(0);Unassigned{class}(0);Unassigned{order}(0);Unassigned{family}(0);Unassigned{genus}(0);Unassigned{species}(0)	Fungi	Unassigned	Unassigned	Unassigned	Unassigned	Unassigned	Unassigned
ASV3413	0	13	0	0	0	0	0	0	0	0	0	0	0	0	0	0	0	13	Fungi{superkingdom}(95);unidentified{phylum}(95);unidentified{class}(95);unidentified{order}(95);unidentified{family}(95);unidentified{genus}(95);unidentified{species}(95)	Fungi	unidentified	unidentified	unidentified	unidentified	unidentified	unidentified
ASV3414	0	13	0	0	0	0	0	0	0	0	0	0	0	0	0	0	0	13	Fungi{superkingdom}(61);Basidiomycota{phylum}(61);Agaricostilbomycetes{class}(61);Agaricostilbales{order}(61);Chionosphaeraceae{family}(61);Kurtzmanomyces{genus}(61);Kurtzmanomyces_nectairei{species}(61)	Fungi	Basidiomycota	Agaricostilbomycetes	Agaricostilbales	Chionosphaeraceae	Kurtzmanomyces	Kurtzmanomyces_nectairei
ASV3415	0	9	0	0	0	0	0	0	0	0	0	0	0	0	0	0	0	9	Fungi{superkingdom}(100);Unassigned{phylum}(0);Unassigned{class}(0);Unassigned{order}(0);Unassigned{family}(0);Unassigned{genus}(0);Unassigned{species}(0)	Fungi	Unassigned	Unassigned	Unassigned	Unassigned	Unassigned	Unassigned
ASV3416	0	0	13	0	0	0	0	0	0	0	0	0	0	0	0	0	0	13	Fungi{superkingdom}(99);Ascomycota{phylum}(99);Sordariomycetes{class}(99);Xylariales{order}(99);Diatrypaceae{family}(99);Monosporascus{genus}(99);unidentified{species}(99)	Fungi	Ascomycota	Sordariomycetes	Xylariales	Diatrypaceae	Monosporascus	unidentified
ASV3417	0	0	0	0	7	0	0	0	0	0	0	0	0	0	0	0	0	7	Fungi{superkingdom}(62);Ascomycota{phylum}(62);Dothideomycetes{class}(62);Pleosporales{order}(62);Phaeosphaeriaceae{family}(62);Allophaeosphaeria{genus}(62);Allophaeosphaeria_muriformia{species}(62)	Fungi	Ascomycota	Dothideomycetes	Pleosporales	Phaeosphaeriaceae	Allophaeosphaeria	Allophaeosphaeria_muriformia
ASV3479	0	0	0	0	0	0	0	0	0	13	0	0	0	0	0	0	0	13	Fungi{superkingdom}(95);unidentified{phylum}(95);unidentified{class}(95);unidentified{order}(95);unidentified{family}(95);unidentified{genus}(95);unidentified{species}(95)	Fungi	unidentified	unidentified	unidentified	unidentified	unidentified	unidentified
ASV3480	0	0	0	0	0	0	0	0	0	0	0	13	0	0	0	0	0	13	Fungi{superkingdom}(79);unidentified{phylum}(79);unidentified{class}(79);unidentified{order}(79);unidentified{family}(79);unidentified{genus}(79);unidentified{species}(79)	Fungi	unidentified	unidentified	unidentified	unidentified	unidentified	unidentified
ASV3481	0	0	0	0	0	0	0	0	0	0	0	13	0	0	0	0	0	13	Fungi{superkingdom}(100);Ascomycota{phylum}(100);Eurotiomycetes{class}(100);Eurotiales{order}(100);Aspergillaceae{family}(100);Aspergillus{genus}(100);Aspergillus_protuberus{species}(100)	Fungi	Ascomycota	Eurotiomycetes	Eurotiales	Aspergillaceae	Aspergillus	Aspergillus_protuberus
ASV3500	0	0	0	0	0	0	0	0	0	0	0	0	0	13	0	0	0	13	Fungi{superkingdom}(100);Unassigned{phylum}(0);Unassigned{class}(0);Unassigned{order}(0);Unassigned{family}(0);Unassigned{genus}(0);Unassigned{species}(0)	Fungi	Unassigned	Unassigned	Unassigned	Unassigned	Unassigned	Unassigned
ASV3501	0	0	0	0	0	0	0	0	0	0	0	0	0	0	13	0	0	13	Fungi{superkingdom}(77);unidentified{phylum}(77);unidentified{class}(77);unidentified{order}(77);unidentified{family}(77);unidentified{genus}(77);unidentified{species}(77)	Fungi	unidentified	unidentified	unidentified	unidentified	unidentified	unidentified
ASV3503	0	12	0	0	0	0	0	0	0	0	0	0	0	0	0	0	0	12	Fungi{superkingdom}(71);Ascomycota{phylum}(71);Unassigned{class}(0);Unassigned{order}(0);Unassigned{family}(0);Unassigned{genus}(0);Unassigned{species}(0)	Fungi	Ascomycota	Unassigned	Unassigned	Unassigned	Unassigned	Unassigned
ASV3504	0	12	0	0	0	0	0	0	0	0	0	0	0	0	0	0	0	12	Fungi{superkingdom}(100);Ascomycota{phylum}(100);Dothideomycetes{class}(100);Pleosporales{order}(100);Didymosphaeriaceae{family}(100);Kalmusia{genus}(100);unidentified{species}(100)	Fungi	Ascomycota	Dothideomycetes	Pleosporales	Didymosphaeriaceae	Kalmusia	unidentified
ASV3505	0	0	12	0	0	0	0	0	0	0	0	0	0	0	0	0	0	12	Fungi{superkingdom}(86);unidentified{phylum}(86);unidentified{class}(86);unidentified{order}(86);unidentified{family}(86);unidentified{genus}(86);unidentified{species}(86)	Fungi	unidentified	unidentified	unidentified	unidentified	unidentified	unidentified
ASV3506	0	0	0	12	0	0	0	0	0	0	0	0	0	0	0	0	0	12	Fungi{superkingdom}(100);Ascomycota{phylum}(100);Sordariomycetes{class}(100);Sordariales{order}(100);Chaetomiaceae{family}(100);Chaetomium{genus}(100);Chaetomium_elatum{species}(100)	Fungi	Ascomycota	Sordariomycetes	Sordariales	Chaetomiaceae	Chaetomium	Chaetomium_elatum
ASV3507	0	0	0	10	0	0	0	0	0	0	0	0	0	0	0	0	0	10	Fungi{superkingdom}(84);unidentified{phylum}(84);unidentified{class}(84);unidentified{order}(84);unidentified{family}(84);unidentified{genus}(84);unidentified{species}(84)	Fungi	unidentified	unidentified	unidentified	unidentified	unidentified	unidentified
ASV3508	0	0	0	2	0	0	0	0	0	0	0	0	0	0	0	0	0	2	Fungi{superkingdom}(69);Ascomycota{phylum}(69);Eurotiomycetes{class}(69);Chaetothyriales{order}(69);Herpotrichiellaceae{family}(69);Veronaea{genus}(69);Unassigned{species}(0)	Fungi	Ascomycota	Eurotiomycetes	Chaetothyriales	Herpotrichiellaceae	Veronaea	Unassigned
ASV3509	0	0	0	0	0	5	0	0	0	0	0	0	0	0	0	0	0	5	Fungi{superkingdom}(62);unidentified{phylum}(62);unidentified{class}(62);unidentified{order}(62);unidentified{family}(62);unidentified{genus}(62);unidentified{species}(62)	Fungi	unidentified	unidentified	unidentified	unidentified	unidentified	unidentified
ASV3510	0	0	0	0	0	4	0	0	0	0	0	0	0	0	0	0	0	4	Fungi{superkingdom}(90);Ascomycota{phylum}(90);Eurotiomycetes{class}(90);Chaetothyriales{order}(90);unidentified{family}(90);unidentified{genus}(90);unidentified{species}(90)	Fungi	Ascomycota	Eurotiomycetes	Chaetothyriales	unidentified	unidentified	unidentified
ASV3576	0	0	0	0	0	0	0	0	12	0	0	0	0	0	0	0	0	12	Fungi{superkingdom}(69);Ascomycota{phylum}(69);Eurotiomycetes{class}(69);Chaetothyriales{order}(69);Herpotrichiellaceae{family}(69);Veronaea{genus}(69);Unassigned{species}(0)	Fungi	Ascomycota	Eurotiomycetes	Chaetothyriales	Herpotrichiellaceae	Veronaea	Unassigned
ASV3577	0	0	0	0	0	0	0	0	12	0	0	0	0	0	0	0	0	12	Fungi{superkingdom}(62);unidentified{phylum}(62);unidentified{class}(62);unidentified{order}(62);unidentified{family}(62);unidentified{genus}(62);unidentified{species}(62)	Fungi	unidentified	unidentified	unidentified	unidentified	unidentified	unidentified
ASV3578	0	0	0	0	0	0	0	0	12	0	0	0	0	0	0	0	0	12	Fungi{superkingdom}(64);Ascomycota{phylum}(64);Dothideomycetes{class}(64);Pleosporales{order}(64);Camarosporidiellaceae{family}(64);Camarosporidiella{genus}(64);Camarosporidiella_mackenziei{species}(64)	Fungi	Ascomycota	Dothideomycetes	Pleosporales	Camarosporidiellaceae	Camarosporidiella	Camarosporidiella_mackenziei
ASV3579	0	0	0	0	0	0	0	0	0	12	0	0	0	0	0	0	0	12	Fungi{superkingdom}(98);unidentified{phylum}(98);unidentified{class}(98);unidentified{order}(98);unidentified{family}(98);unidentified{genus}(98);unidentified{species}(98)	Fungi	unidentified	unidentified	unidentified	unidentified	unidentified	unidentified
ASV3580	0	0	0	0	0	0	0	0	0	12	0	0	0	0	0	0	0	12	Fungi{superkingdom}(80);unidentified{phylum}(80);unidentified{class}(80);unidentified{order}(80);unidentified{family}(80);unidentified{genus}(80);unidentified{species}(80)	Fungi	unidentified	unidentified	unidentified	unidentified	unidentified	unidentified
ASV3595	0	0	0	0	0	0	0	0	0	0	0	0	0	12	0	0	0	12	Fungi{superkingdom}(100);Unassigned{phylum}(0);Unassigned{class}(0);Unassigned{order}(0);Unassigned{family}(0);Unassigned{genus}(0);Unassigned{species}(0)	Fungi	Unassigned	Unassigned	Unassigned	Unassigned	Unassigned	Unassigned
ASV3596	0	0	0	0	0	0	0	0	0	0	0	0	0	0	0	12	0	12	Fungi{superkingdom}(100);Unassigned{phylum}(0);Unassigned{class}(0);Unassigned{order}(0);Unassigned{family}(0);Unassigned{genus}(0);Unassigned{species}(0)	Fungi	Unassigned	Unassigned	Unassigned	Unassigned	Unassigned	Unassigned
ASV3597	11	0	0	0	0	0	0	0	0	0	0	0	0	0	0	0	0	11	Fungi{superkingdom}(69);Basidiomycota{phylum}(69);Cystobasidiomycetes{class}(69);Erythrobasidiales{order}(69);Erythrobasidiaceae{family}(69);Erythrobasidium{genus}(69);unidentified{species}(69)	Fungi	Basidiomycota	Cystobasidiomycetes	Erythrobasidiales	Erythrobasidiaceae	Erythrobasidium	unidentified
ASV3598	11	0	0	0	0	0	0	0	0	0	0	0	0	0	0	0	0	11	Fungi{superkingdom}(85);unidentified{phylum}(85);unidentified{class}(85);unidentified{order}(85);unidentified{family}(85);unidentified{genus}(85);unidentified{species}(85)	Fungi	unidentified	unidentified	unidentified	unidentified	unidentified	unidentified
ASV3599	0	11	0	0	0	0	0	0	0	0	0	0	0	0	0	0	0	11	Fungi{superkingdom}(85);Ascomycota{phylum}(85);Eurotiomycetes{class}(85);Chaetothyriales{order}(85);unidentified{family}(85);unidentified{genus}(85);unidentified{species}(85)	Fungi	Ascomycota	Eurotiomycetes	Chaetothyriales	unidentified	unidentified	unidentified
ASV3600	0	11	0	0	0	0	0	0	0	0	0	0	0	0	0	0	0	11	Fungi{superkingdom}(66);Ascomycota{phylum}(66);unidentified{class}(66);unidentified{order}(66);unidentified{family}(66);unidentified{genus}(66);unidentified{species}(66)	Fungi	Ascomycota	unidentified	unidentified	unidentified	unidentified	unidentified
ASV3601	0	11	0	0	0	0	0	0	0	0	0	0	0	0	0	0	0	11	Fungi{superkingdom}(79);Ascomycota{phylum}(79);Unassigned{class}(0);Unassigned{order}(0);Unassigned{family}(0);Unassigned{genus}(0);Unassigned{species}(0)	Fungi	Ascomycota	Unassigned	Unassigned	Unassigned	Unassigned	Unassigned
ASV3602	0	11	0	0	0	0	0	0	0	0	0	0	0	0	0	0	0	11	Fungi{superkingdom}(99);Ascomycota{phylum}(99);Eurotiomycetes{class}(99);Chaetothyriales{order}(99);unidentified{family}(99);unidentified{genus}(99);unidentified{species}(99)	Fungi	Ascomycota	Eurotiomycetes	Chaetothyriales	unidentified	unidentified	unidentified
ASV3603	0	9	0	0	0	0	0	0	0	0	0	0	0	0	0	0	0	9	Fungi{superkingdom}(100);Unassigned{phylum}(0);Unassigned{class}(0);Unassigned{order}(0);Unassigned{family}(0);Unassigned{genus}(0);Unassigned{species}(0)	Fungi	Unassigned	Unassigned	Unassigned	Unassigned	Unassigned	Unassigned
ASV3604	0	0	11	0	0	0	0	0	0	0	0	0	0	0	0	0	0	11	Fungi{superkingdom}(84);Basidiomycota{phylum}(84);Agaricomycetes{class}(84);unidentified{order}(84);unidentified{family}(84);unidentified{genus}(84);unidentified{species}(84)	Fungi	Basidiomycota	Agaricomycetes	unidentified	unidentified	unidentified	unidentified
ASV3605	0	0	0	0	11	0	0	0	0	0	0	0	0	0	0	0	0	11	Fungi{superkingdom}(87);unidentified{phylum}(87);unidentified{class}(87);unidentified{order}(87);unidentified{family}(87);unidentified{genus}(87);unidentified{species}(87)	Fungi	unidentified	unidentified	unidentified	unidentified	unidentified	unidentified
ASV3606	0	0	0	0	5	0	0	0	0	0	0	0	0	0	0	0	0	5	Fungi{superkingdom}(65);unidentified{phylum}(65);unidentified{class}(65);unidentified{order}(65);unidentified{family}(65);unidentified{genus}(65);unidentified{species}(65)	Fungi	unidentified	unidentified	unidentified	unidentified	unidentified	unidentified
ASV3660	0	0	0	0	0	0	11	0	0	0	0	0	0	0	0	0	0	11	Fungi{superkingdom}(67);Ascomycota{phylum}(67);Sordariomycetes{class}(67);Calosphaeriales{order}(67);Calosphaeriaceae{family}(67);Jattaea{genus}(67);Jattaea_prunicola{species}(67)	Fungi	Ascomycota	Sordariomycetes	Calosphaeriales	Calosphaeriaceae	Jattaea	Jattaea_prunicola
ASV3661	0	0	0	0	0	0	0	11	0	0	0	0	0	0	0	0	0	11	Fungi{superkingdom}(99);Ascomycota{phylum}(99);Sordariomycetes{class}(99);Hypocreales{order}(99);Nectriaceae{family}(99);Fusicolla{genus}(99);Fusicolla_acetilerea{species}(99)	Fungi	Ascomycota	Sordariomycetes	Hypocreales	Nectriaceae	Fusicolla	Fusicolla_acetilerea
ASV3690	0	0	0	0	0	0	0	0	0	0	0	0	11	0	0	0	0	11	Fungi{superkingdom}(83);unidentified{phylum}(83);unidentified{class}(83);unidentified{order}(83);unidentified{family}(83);unidentified{genus}(83);unidentified{species}(83)	Fungi	unidentified	unidentified	unidentified	unidentified	unidentified	unidentified
ASV3691	0	0	0	0	0	0	0	0	0	0	0	0	0	11	0	0	0	11	Fungi{superkingdom}(85);unidentified{phylum}(85);unidentified{class}(85);unidentified{order}(85);unidentified{family}(85);unidentified{genus}(85);unidentified{species}(85)	Fungi	unidentified	unidentified	unidentified	unidentified	unidentified	unidentified
ASV3692	0	0	0	0	0	0	0	0	0	0	0	0	0	0	11	0	0	11	Fungi{superkingdom}(100);Unassigned{phylum}(0);Unassigned{class}(0);Unassigned{order}(0);Unassigned{family}(0);Unassigned{genus}(0);Unassigned{species}(0)	Fungi	Unassigned	Unassigned	Unassigned	Unassigned	Unassigned	Unassigned
ASV3693	0	0	0	0	0	0	0	0	0	0	0	0	0	0	0	11	0	11	Fungi{superkingdom}(84);Ascomycota{phylum}(84);Sordariomycetes{class}(84);Sordariales{order}(84);Chaetomiaceae{family}(84);Unassigned{genus}(0);Unassigned{species}(0)	Fungi	Ascomycota	Sordariomycetes	Sordariales	Chaetomiaceae	Unassigned	Unassigned
ASV3694	0	0	0	0	0	0	0	0	0	0	0	0	0	0	0	11	0	11	Fungi{superkingdom}(88);unidentified{phylum}(88);unidentified{class}(88);unidentified{order}(88);unidentified{family}(88);unidentified{genus}(88);unidentified{species}(88)	Fungi	unidentified	unidentified	unidentified	unidentified	unidentified	unidentified
ASV3695	0	0	0	0	0	0	0	0	0	0	0	0	0	0	0	0	11	11	Fungi{superkingdom}(89);Ascomycota{phylum}(89);Sordariomycetes{class}(89);Xylariales{order}(89);Unassigned{family}(0);Unassigned{genus}(0);Unassigned{species}(0)	Fungi	Ascomycota	Sordariomycetes	Xylariales	Unassigned	Unassigned	Unassigned
ASV3696	0	10	0	0	0	0	0	0	0	0	0	0	0	0	0	0	0	10	Fungi{superkingdom}(87);unidentified{phylum}(87);unidentified{class}(87);unidentified{order}(87);unidentified{family}(87);unidentified{genus}(87);unidentified{species}(87)	Fungi	unidentified	unidentified	unidentified	unidentified	unidentified	unidentified
ASV3697	0	10	0	0	0	0	0	0	0	0	0	0	0	0	0	0	0	10	Fungi{superkingdom}(70);unidentified{phylum}(70);unidentified{class}(70);unidentified{order}(70);unidentified{family}(70);unidentified{genus}(70);unidentified{species}(70)	Fungi	unidentified	unidentified	unidentified	unidentified	unidentified	unidentified
ASV3698	0	10	0	0	0	0	0	0	0	0	0	0	0	0	0	0	0	10	Fungi{superkingdom}(65);unidentified{phylum}(65);unidentified{class}(65);unidentified{order}(65);unidentified{family}(65);unidentified{genus}(65);unidentified{species}(65)	Fungi	unidentified	unidentified	unidentified	unidentified	unidentified	unidentified
ASV3699	0	10	0	0	0	0	0	0	0	0	0	0	0	0	0	0	0	10	Fungi{superkingdom}(100);Ascomycota{phylum}(100);Sordariomycetes{class}(100);Sordariales{order}(100);Lasiosphaeriaceae{family}(100);Podospora{genus}(100);Podospora_pyriformis{species}(100)	Fungi	Ascomycota	Sordariomycetes	Sordariales	Lasiosphaeriaceae	Podospora	Podospora_pyriformis
ASV3700	0	10	0	0	0	0	0	0	0	0	0	0	0	0	0	0	0	10	Fungi{superkingdom}(80);Ascomycota{phylum}(80);Dothideomycetes{class}(80);Pleosporales{order}(80);Camarosporidiellaceae{family}(80);Camarosporidiella{genus}(80);Unassigned{species}(0)	Fungi	Ascomycota	Dothideomycetes	Pleosporales	Camarosporidiellaceae	Camarosporidiella	Unassigned
ASV3701	0	10	0	0	0	0	0	0	0	0	0	0	0	0	0	0	0	10	Fungi{superkingdom}(98);unidentified{phylum}(98);unidentified{class}(98);unidentified{order}(98);unidentified{family}(98);unidentified{genus}(98);unidentified{species}(98)	Fungi	unidentified	unidentified	unidentified	unidentified	unidentified	unidentified
ASV3702	0	0	10	0	0	0	0	0	0	0	0	0	0	0	0	0	0	10	Fungi{superkingdom}(63);unidentified{phylum}(63);unidentified{class}(63);unidentified{order}(63);unidentified{family}(63);unidentified{genus}(63);unidentified{species}(63)	Fungi	unidentified	unidentified	unidentified	unidentified	unidentified	unidentified
ASV3703	0	0	10	0	0	0	0	0	0	0	0	0	0	0	0	0	0	10	Fungi{superkingdom}(88);unidentified{phylum}(88);unidentified{class}(88);unidentified{order}(88);unidentified{family}(88);unidentified{genus}(88);unidentified{species}(88)	Fungi	unidentified	unidentified	unidentified	unidentified	unidentified	unidentified
ASV3704	0	0	0	10	0	0	0	0	0	0	0	0	0	0	0	0	0	10	Fungi{superkingdom}(100);Basidiomycota{phylum}(100);Agaricomycetes{class}(100);Agaricales{order}(100);Psathyrellaceae{family}(100);Psathyrella{genus}(100);Psathyrella_ammophila{species}(100)	Fungi	Basidiomycota	Agaricomycetes	Agaricales	Psathyrellaceae	Psathyrella	Psathyrella_ammophila
ASV3705	0	0	0	0	10	0	0	0	0	0	0	0	0	0	0	0	0	10	Fungi{superkingdom}(73);Basidiomycota{phylum}(73);Agaricomycetes{class}(73);unidentified{order}(73);unidentified{family}(73);unidentified{genus}(73);unidentified{species}(73)	Fungi	Basidiomycota	Agaricomycetes	unidentified	unidentified	unidentified	unidentified
ASV3706	0	0	0	0	0	10	0	0	0	0	0	0	0	0	0	0	0	10	Fungi{superkingdom}(92);unidentified{phylum}(92);unidentified{class}(92);unidentified{order}(92);unidentified{family}(92);unidentified{genus}(92);unidentified{species}(92)	Fungi	unidentified	unidentified	unidentified	unidentified	unidentified	unidentified
ASV3707	0	0	0	0	0	10	0	0	0	0	0	0	0	0	0	0	0	10	Fungi{superkingdom}(100);Chytridiomycota{phylum}(100);Rhizophlyctidomycetes{class}(100);Rhizophlyctidales{order}(100);Rhizophlyctidaceae{family}(100);Rhizophlyctis{genus}(100);unidentified{species}(100)	Fungi	Chytridiomycota	Rhizophlyctidomycetes	Rhizophlyctidales	Rhizophlyctidaceae	Rhizophlyctis	unidentified
ASV3708	0	0	0	0	0	10	0	0	0	0	0	0	0	0	0	0	0	10	Fungi{superkingdom}(100);Unassigned{phylum}(0);Unassigned{class}(0);Unassigned{order}(0);Unassigned{family}(0);Unassigned{genus}(0);Unassigned{species}(0)	Fungi	Unassigned	Unassigned	Unassigned	Unassigned	Unassigned	Unassigned
ASV3780	0	0	0	0	0	0	0	10	0	0	0	0	0	0	0	0	0	10	Fungi{superkingdom}(100);Unassigned{phylum}(0);Unassigned{class}(0);Unassigned{order}(0);Unassigned{family}(0);Unassigned{genus}(0);Unassigned{species}(0)	Fungi	Unassigned	Unassigned	Unassigned	Unassigned	Unassigned	Unassigned
ASV3781	0	0	0	0	0	0	0	0	10	0	0	0	0	0	0	0	0	10	Fungi{superkingdom}(94);unidentified{phylum}(94);unidentified{class}(94);unidentified{order}(94);unidentified{family}(94);unidentified{genus}(94);unidentified{species}(94)	Fungi	unidentified	unidentified	unidentified	unidentified	unidentified	unidentified
ASV3782	0	0	0	0	0	0	0	0	0	10	0	0	0	0	0	0	0	10	Fungi{superkingdom}(83);unidentified{phylum}(83);unidentified{class}(83);unidentified{order}(83);unidentified{family}(83);unidentified{genus}(83);unidentified{species}(83)	Fungi	unidentified	unidentified	unidentified	unidentified	unidentified	unidentified
ASV3784	0	0	0	0	0	0	0	0	0	0	0	10	0	0	0	0	0	10	Fungi{superkingdom}(100);Unassigned{phylum}(0);Unassigned{class}(0);Unassigned{order}(0);Unassigned{family}(0);Unassigned{genus}(0);Unassigned{species}(0)	Fungi	Unassigned	Unassigned	Unassigned	Unassigned	Unassigned	Unassigned
ASV3785	0	0	0	0	0	0	0	0	0	0	0	10	0	0	0	0	0	10	Fungi{superkingdom}(93);Ascomycota{phylum}(93);Dothideomycetes{class}(93);Pleosporales{order}(93);Leptosphaeriaceae{family}(93);Sphaerellopsis{genus}(93);Sphaerellopsis_isthmospora{species}(93)	Fungi	Ascomycota	Dothideomycetes	Pleosporales	Leptosphaeriaceae	Sphaerellopsis	Sphaerellopsis_isthmospora
ASV3786	0	0	0	0	0	0	0	0	0	0	0	10	0	0	0	0	0	10	Fungi{superkingdom}(91);unidentified{phylum}(91);unidentified{class}(91);unidentified{order}(91);unidentified{family}(91);unidentified{genus}(91);unidentified{species}(91)	Fungi	unidentified	unidentified	unidentified	unidentified	unidentified	unidentified
ASV3787	0	0	0	0	0	0	0	0	0	0	0	10	0	0	0	0	0	10	Fungi{superkingdom}(100);Unassigned{phylum}(0);Unassigned{class}(0);Unassigned{order}(0);Unassigned{family}(0);Unassigned{genus}(0);Unassigned{species}(0)	Fungi	Unassigned	Unassigned	Unassigned	Unassigned	Unassigned	Unassigned
ASV3788	0	0	0	0	0	0	0	0	0	0	0	10	0	0	0	0	0	10	Fungi{superkingdom}(96);unidentified{phylum}(96);unidentified{class}(96);unidentified{order}(96);unidentified{family}(96);unidentified{genus}(96);unidentified{species}(96)	Fungi	unidentified	unidentified	unidentified	unidentified	unidentified	unidentified
ASV3815	0	0	0	0	0	0	0	0	0	0	0	0	10	0	0	0	0	10	Fungi{superkingdom}(94);unidentified{phylum}(94);unidentified{class}(94);unidentified{order}(94);unidentified{family}(94);unidentified{genus}(94);unidentified{species}(94)	Fungi	unidentified	unidentified	unidentified	unidentified	unidentified	unidentified
ASV3816	0	0	0	0	0	0	0	0	0	0	0	0	10	0	0	0	0	10	Fungi{superkingdom}(94);unidentified{phylum}(94);unidentified{class}(94);unidentified{order}(94);unidentified{family}(94);unidentified{genus}(94);unidentified{species}(94)	Fungi	unidentified	unidentified	unidentified	unidentified	unidentified	unidentified
ASV3817	0	0	0	0	0	0	0	0	0	0	0	0	0	0	0	10	0	10	Fungi{superkingdom}(100);Unassigned{phylum}(0);Unassigned{class}(0);Unassigned{order}(0);Unassigned{family}(0);Unassigned{genus}(0);Unassigned{species}(0)	Fungi	Unassigned	Unassigned	Unassigned	Unassigned	Unassigned	Unassigned
ASV3818	0	0	0	0	0	0	0	0	0	0	0	0	0	0	0	10	0	10	Fungi{superkingdom}(72);unidentified{phylum}(72);unidentified{class}(72);unidentified{order}(72);unidentified{family}(72);unidentified{genus}(72);unidentified{species}(72)	Fungi	unidentified	unidentified	unidentified	unidentified	unidentified	unidentified
ASV3819	0	0	0	0	0	0	0	0	0	0	0	0	0	0	0	0	10	10	Fungi{superkingdom}(100);Unassigned{phylum}(0);Unassigned{class}(0);Unassigned{order}(0);Unassigned{family}(0);Unassigned{genus}(0);Unassigned{species}(0)	Fungi	Unassigned	Unassigned	Unassigned	Unassigned	Unassigned	Unassigned
ASV3820	0	0	9	0	0	0	0	0	0	0	0	0	0	0	0	0	0	9	Fungi{superkingdom}(78);Glomeromycota{phylum}(78);Glomeromycetes{class}(78);Glomerales{order}(78);Glomeraceae{family}(78);unidentified{genus}(78);unidentified{species}(78)	Fungi	Glomeromycota	Glomeromycetes	Glomerales	Glomeraceae	unidentified	unidentified
ASV3821	0	0	9	0	0	0	0	0	0	0	0	0	0	0	0	0	0	9	Fungi{superkingdom}(88);Ascomycota{phylum}(88);Sordariomycetes{class}(88);Hypocreales{order}(88);Bionectriaceae{family}(88);Clonostachys{genus}(88);Clonostachys_rosea{species}(88)	Fungi	Ascomycota	Sordariomycetes	Hypocreales	Bionectriaceae	Clonostachys	Clonostachys_rosea
ASV3822	0	0	4	0	0	0	0	0	0	0	0	0	0	0	0	0	0	4	Fungi{superkingdom}(95);unidentified{phylum}(95);unidentified{class}(95);unidentified{order}(95);unidentified{family}(95);unidentified{genus}(95);unidentified{species}(95)	Fungi	unidentified	unidentified	unidentified	unidentified	unidentified	unidentified
ASV3823	0	0	0	9	0	0	0	0	0	0	0	0	0	0	0	0	0	9	Fungi{superkingdom}(100);Unassigned{phylum}(0);Unassigned{class}(0);Unassigned{order}(0);Unassigned{family}(0);Unassigned{genus}(0);Unassigned{species}(0)	Fungi	Unassigned	Unassigned	Unassigned	Unassigned	Unassigned	Unassigned
ASV3824	0	0	0	9	0	0	0	0	0	0	0	0	0	0	0	0	0	9	Fungi{superkingdom}(100);Basidiomycota{phylum}(100);Agaricomycetes{class}(100);Agaricales{order}(100);Bolbitiaceae{family}(100);Conocybe{genus}(100);Conocybe_deliquescens{species}(100)	Fungi	Basidiomycota	Agaricomycetes	Agaricales	Bolbitiaceae	Conocybe	Conocybe_deliquescens
ASV3825	0	0	0	0	9	0	0	0	0	0	0	0	0	0	0	0	0	9	Fungi{superkingdom}(89);unidentified{phylum}(89);unidentified{class}(89);unidentified{order}(89);unidentified{family}(89);unidentified{genus}(89);unidentified{species}(89)	Fungi	unidentified	unidentified	unidentified	unidentified	unidentified	unidentified
ASV3826	0	0	0	0	0	9	0	0	0	0	0	0	0	0	0	0	0	9	Fungi{superkingdom}(100);Unassigned{phylum}(0);Unassigned{class}(0);Unassigned{order}(0);Unassigned{family}(0);Unassigned{genus}(0);Unassigned{species}(0)	Fungi	Unassigned	Unassigned	Unassigned	Unassigned	Unassigned	Unassigned
ASV3827	0	0	0	0	0	9	0	0	0	0	0	0	0	0	0	0	0	9	Fungi{superkingdom}(71);Basidiomycota{phylum}(71);Agaricomycetes{class}(71);Unassigned{order}(0);Unassigned{family}(0);Unassigned{genus}(0);Unassigned{species}(0)	Fungi	Basidiomycota	Agaricomycetes	Unassigned	Unassigned	Unassigned	Unassigned
ASV3828	0	0	0	0	0	9	0	0	0	0	0	0	0	0	0	0	0	9	Fungi{superkingdom}(100);Ascomycota{phylum}(100);Dothideomycetes{class}(100);Pleosporales{order}(100);Lentitheciaceae{family}(100);Keissleriella{genus}(100);Unassigned{species}(0)	Fungi	Ascomycota	Dothideomycetes	Pleosporales	Lentitheciaceae	Keissleriella	Unassigned
ASV3870	0	0	0	0	0	0	0	0	0	0	0	0	2	0	0	0	0	2	Fungi{superkingdom}(100);Ascomycota{phylum}(100);Saccharomycetes{class}(100);Saccharomycetales{order}(100);Phaffomycetaceae{family}(100);Cyberlindnera{genus}(100);Cyberlindnera_jadinii{species}(100)	Fungi	Ascomycota	Saccharomycetes	Saccharomycetales	Phaffomycetaceae	Cyberlindnera	Cyberlindnera_jadinii
ASV3920	0	0	0	0	0	0	0	9	0	0	0	0	0	0	0	0	0	9	Fungi{superkingdom}(100);Unassigned{phylum}(0);Unassigned{class}(0);Unassigned{order}(0);Unassigned{family}(0);Unassigned{genus}(0);Unassigned{species}(0)	Fungi	Unassigned	Unassigned	Unassigned	Unassigned	Unassigned	Unassigned
ASV3921	0	0	0	0	0	0	0	0	9	0	0	0	0	0	0	0	0	9	Fungi{superkingdom}(100);Unassigned{phylum}(0);Unassigned{class}(0);Unassigned{order}(0);Unassigned{family}(0);Unassigned{genus}(0);Unassigned{species}(0)	Fungi	Unassigned	Unassigned	Unassigned	Unassigned	Unassigned	Unassigned
ASV3922	0	0	0	0	0	0	0	0	9	0	0	0	0	0	0	0	0	9	Fungi{superkingdom}(100);Unassigned{phylum}(0);Unassigned{class}(0);Unassigned{order}(0);Unassigned{family}(0);Unassigned{genus}(0);Unassigned{species}(0)	Fungi	Unassigned	Unassigned	Unassigned	Unassigned	Unassigned	Unassigned
ASV3923	0	0	0	0	0	0	0	0	9	0	0	0	0	0	0	0	0	9	Fungi{superkingdom}(99);Ascomycota{phylum}(99);Sordariomycetes{class}(99);Glomerellales{order}(99);Plectosphaerellaceae{family}(99);Verticillium{genus}(99);Verticillium_leptobactrum{species}(99)	Fungi	Ascomycota	Sordariomycetes	Glomerellales	Plectosphaerellaceae	Verticillium	Verticillium_leptobactrum
ASV3924	0	0	0	0	0	0	0	0	9	0	0	0	0	0	0	0	0	9	Fungi{superkingdom}(69);Ascomycota{phylum}(69);Dothideomycetes{class}(69);Pleosporales{order}(69);Lophiostomataceae{family}(69);Lophiostoma{genus}(69);Lophiostoma_rosae{species}(69)	Fungi	Ascomycota	Dothideomycetes	Pleosporales	Lophiostomataceae	Lophiostoma	Lophiostoma_rosae
ASV3925	0	0	0	0	0	0	0	0	0	0	0	9	0	0	0	0	0	9	Fungi{superkingdom}(99);unidentified{phylum}(99);unidentified{class}(99);unidentified{order}(99);unidentified{family}(99);unidentified{genus}(99);unidentified{species}(99)	Fungi	unidentified	unidentified	unidentified	unidentified	unidentified	unidentified
ASV3926	0	0	0	0	0	0	0	0	0	0	0	9	0	0	0	0	0	9	Fungi{superkingdom}(95);unidentified{phylum}(95);unidentified{class}(95);unidentified{order}(95);unidentified{family}(95);unidentified{genus}(95);unidentified{species}(95)	Fungi	unidentified	unidentified	unidentified	unidentified	unidentified	unidentified
ASV3927	0	0	0	0	0	0	0	0	0	0	0	9	0	0	0	0	0	9	Fungi{superkingdom}(86);unidentified{phylum}(86);unidentified{class}(86);unidentified{order}(86);unidentified{family}(86);unidentified{genus}(86);unidentified{species}(86)	Fungi	unidentified	unidentified	unidentified	unidentified	unidentified	unidentified
ASV3928	0	0	0	0	0	0	0	0	0	0	0	9	0	0	0	0	0	9	Fungi{superkingdom}(90);unidentified{phylum}(90);unidentified{class}(90);unidentified{order}(90);unidentified{family}(90);unidentified{genus}(90);unidentified{species}(90)	Fungi	unidentified	unidentified	unidentified	unidentified	unidentified	unidentified
ASV3929	0	0	0	0	0	0	0	0	0	0	0	9	0	0	0	0	0	9	Fungi{superkingdom}(61);Ascomycota{phylum}(61);Dothideomycetes{class}(61);Pleosporales{order}(61);Phaeosphaeriaceae{family}(61);Unassigned{genus}(0);Unassigned{species}(0)	Fungi	Ascomycota	Dothideomycetes	Pleosporales	Phaeosphaeriaceae	Unassigned	Unassigned
ASV3955	0	0	0	0	0	0	0	0	0	0	0	0	0	0	0	7	0	7	Fungi{superkingdom}(70);unidentified{phylum}(70);unidentified{class}(70);unidentified{order}(70);unidentified{family}(70);unidentified{genus}(70);unidentified{species}(70)	Fungi	unidentified	unidentified	unidentified	unidentified	unidentified	unidentified
ASV3959	0	0	0	0	0	0	0	0	0	0	0	0	9	0	0	0	0	9	Fungi{superkingdom}(91);unidentified{phylum}(91);unidentified{class}(91);unidentified{order}(91);unidentified{family}(91);unidentified{genus}(91);unidentified{species}(91)	Fungi	unidentified	unidentified	unidentified	unidentified	unidentified	unidentified
ASV3960	0	0	0	0	0	0	0	0	0	0	0	0	0	0	9	0	0	9	Fungi{superkingdom}(91);unidentified{phylum}(91);unidentified{class}(91);unidentified{order}(91);unidentified{family}(91);unidentified{genus}(91);unidentified{species}(91)	Fungi	unidentified	unidentified	unidentified	unidentified	unidentified	unidentified
ASV3961	0	0	0	0	0	0	0	0	0	0	0	0	0	0	0	9	0	9	Fungi{superkingdom}(100);Unassigned{phylum}(0);Unassigned{class}(0);Unassigned{order}(0);Unassigned{family}(0);Unassigned{genus}(0);Unassigned{species}(0)	Fungi	Unassigned	Unassigned	Unassigned	Unassigned	Unassigned	Unassigned
ASV3962	0	0	0	0	0	0	0	0	0	0	0	0	0	0	0	9	0	9	Fungi{superkingdom}(100);Unassigned{phylum}(0);Unassigned{class}(0);Unassigned{order}(0);Unassigned{family}(0);Unassigned{genus}(0);Unassigned{species}(0)	Fungi	Unassigned	Unassigned	Unassigned	Unassigned	Unassigned	Unassigned
ASV3963	8	0	0	0	0	0	0	0	0	0	0	0	0	0	0	0	0	8	Fungi{superkingdom}(95);unidentified{phylum}(95);unidentified{class}(95);unidentified{order}(95);unidentified{family}(95);unidentified{genus}(95);unidentified{species}(95)	Fungi	unidentified	unidentified	unidentified	unidentified	unidentified	unidentified
ASV3964	8	0	0	0	0	0	0	0	0	0	0	0	0	0	0	0	0	8	Fungi{superkingdom}(87);Ascomycota{phylum}(87);Sordariomycetes{class}(87);Hypocreales{order}(87);Nectriaceae{family}(87);Fusarium{genus}(87);Unassigned{species}(0)	Fungi	Ascomycota	Sordariomycetes	Hypocreales	Nectriaceae	Fusarium	Unassigned
ASV3965	8	0	0	0	0	0	0	0	0	0	0	0	0	0	0	0	0	8	Fungi{superkingdom}(82);Ascomycota{phylum}(82);Dothideomycetes{class}(82);Unassigned{order}(0);Unassigned{family}(0);Unassigned{genus}(0);Unassigned{species}(0)	Fungi	Ascomycota	Dothideomycetes	Unassigned	Unassigned	Unassigned	Unassigned
ASV3966	0	8	0	0	0	0	0	0	0	0	0	0	0	0	0	0	0	8	Fungi{superkingdom}(100);Unassigned{phylum}(0);Unassigned{class}(0);Unassigned{order}(0);Unassigned{family}(0);Unassigned{genus}(0);Unassigned{species}(0)	Fungi	Unassigned	Unassigned	Unassigned	Unassigned	Unassigned	Unassigned
ASV3967	0	8	0	0	0	0	0	0	0	0	0	0	0	0	0	0	0	8	Fungi{superkingdom}(63);unidentified{phylum}(63);unidentified{class}(63);unidentified{order}(63);unidentified{family}(63);unidentified{genus}(63);unidentified{species}(63)	Fungi	unidentified	unidentified	unidentified	unidentified	unidentified	unidentified
ASV3968	0	8	0	0	0	0	0	0	0	0	0	0	0	0	0	0	0	8	Fungi{superkingdom}(99);unidentified{phylum}(99);unidentified{class}(99);unidentified{order}(99);unidentified{family}(99);unidentified{genus}(99);unidentified{species}(99)	Fungi	unidentified	unidentified	unidentified	unidentified	unidentified	unidentified
ASV3969	0	8	0	0	0	0	0	0	0	0	0	0	0	0	0	0	0	8	Fungi{superkingdom}(91);Ascomycota{phylum}(91);Eurotiomycetes{class}(91);Chaetothyriales{order}(91);unidentified{family}(91);unidentified{genus}(91);unidentified{species}(91)	Fungi	Ascomycota	Eurotiomycetes	Chaetothyriales	unidentified	unidentified	unidentified
ASV3970	0	8	0	0	0	0	0	0	0	0	0	0	0	0	0	0	0	8	Fungi{superkingdom}(100);Unassigned{phylum}(0);Unassigned{class}(0);Unassigned{order}(0);Unassigned{family}(0);Unassigned{genus}(0);Unassigned{species}(0)	Fungi	Unassigned	Unassigned	Unassigned	Unassigned	Unassigned	Unassigned
ASV3971	0	8	0	0	0	0	0	0	0	0	0	0	0	0	0	0	0	8	Fungi{superkingdom}(97);Ascomycota{phylum}(97);Dothideomycetes{class}(97);Pleosporales{order}(97);Pleosporaceae{family}(97);Alternaria{genus}(97);Alternaria_subcucurbitae{species}(97)	Fungi	Ascomycota	Dothideomycetes	Pleosporales	Pleosporaceae	Alternaria	Alternaria_subcucurbitae
ASV3972	0	8	0	0	0	0	0	0	0	0	0	0	0	0	0	0	0	8	Fungi{superkingdom}(100);Unassigned{phylum}(0);Unassigned{class}(0);Unassigned{order}(0);Unassigned{family}(0);Unassigned{genus}(0);Unassigned{species}(0)	Fungi	Unassigned	Unassigned	Unassigned	Unassigned	Unassigned	Unassigned
ASV3973	0	8	0	0	0	0	0	0	0	0	0	0	0	0	0	0	0	8	Fungi{superkingdom}(67);Ascomycota{phylum}(67);Orbiliomycetes{class}(67);Orbiliales{order}(67);Orbiliaceae{family}(67);Arthrobotrys{genus}(67);Arthrobotrys_cladodes{species}(67)	Fungi	Ascomycota	Orbiliomycetes	Orbiliales	Orbiliaceae	Arthrobotrys	Arthrobotrys_cladodes
ASV3974	0	8	0	0	0	0	0	0	0	0	0	0	0	0	0	0	0	8	Fungi{superkingdom}(95);unidentified{phylum}(95);unidentified{class}(95);unidentified{order}(95);unidentified{family}(95);unidentified{genus}(95);unidentified{species}(95)	Fungi	unidentified	unidentified	unidentified	unidentified	unidentified	unidentified
ASV3975	0	0	8	0	0	0	0	0	0	0	0	0	0	0	0	0	0	8	Fungi{superkingdom}(99);Mucoromycota{phylum}(99);Mucoromycetes{class}(99);Mucorales{order}(99);Lichtheimiaceae{family}(99);Circinella{genus}(99);Circinella_chinensis{species}(99)	Fungi	Mucoromycota	Mucoromycetes	Mucorales	Lichtheimiaceae	Circinella	Circinella_chinensis
ASV3976	0	0	8	0	0	0	0	0	0	0	0	0	0	0	0	0	0	8	Fungi{superkingdom}(100);Unassigned{phylum}(0);Unassigned{class}(0);Unassigned{order}(0);Unassigned{family}(0);Unassigned{genus}(0);Unassigned{species}(0)	Fungi	Unassigned	Unassigned	Unassigned	Unassigned	Unassigned	Unassigned
ASV3977	0	0	0	8	0	0	0	0	0	0	0	0	0	0	0	0	0	8	Fungi{superkingdom}(100);Unassigned{phylum}(0);Unassigned{class}(0);Unassigned{order}(0);Unassigned{family}(0);Unassigned{genus}(0);Unassigned{species}(0)	Fungi	Unassigned	Unassigned	Unassigned	Unassigned	Unassigned	Unassigned
ASV3978	0	0	0	0	8	0	0	0	0	0	0	0	0	0	0	0	0	8	Fungi{superkingdom}(100);Unassigned{phylum}(0);Unassigned{class}(0);Unassigned{order}(0);Unassigned{family}(0);Unassigned{genus}(0);Unassigned{species}(0)	Fungi	Unassigned	Unassigned	Unassigned	Unassigned	Unassigned	Unassigned
ASV3979	0	0	0	0	5	0	0	0	0	0	0	0	0	0	0	0	0	5	Fungi{superkingdom}(97);Ascomycota{phylum}(97);Sordariomycetes{class}(97);Hypocreales{order}(97);Hypocreales_fam_Incertae_sedis{family}(97);Acremonium{genus}(97);Acremonium_roseolum{species}(97)	Fungi	Ascomycota	Sordariomycetes	Hypocreales	Hypocreales_fam_Incertae_sedis	Acremonium	Acremonium_roseolum
ASV4074	0	0	0	0	0	0	8	0	0	0	0	0	0	0	0	0	0	8	Fungi{superkingdom}(100);Unassigned{phylum}(0);Unassigned{class}(0);Unassigned{order}(0);Unassigned{family}(0);Unassigned{genus}(0);Unassigned{species}(0)	Fungi	Unassigned	Unassigned	Unassigned	Unassigned	Unassigned	Unassigned
ASV4076	0	0	0	0	0	0	0	8	0	0	0	0	0	0	0	0	0	8	Fungi{superkingdom}(61);Chytridiomycota{phylum}(61);unidentified{class}(61);unidentified{order}(61);unidentified{family}(61);unidentified{genus}(61);unidentified{species}(61)	Fungi	Chytridiomycota	unidentified	unidentified	unidentified	unidentified	unidentified
ASV4078	0	0	0	0	0	0	0	0	0	0	0	8	0	0	0	0	0	8	Fungi{superkingdom}(87);unidentified{phylum}(87);unidentified{class}(87);unidentified{order}(87);unidentified{family}(87);unidentified{genus}(87);unidentified{species}(87)	Fungi	unidentified	unidentified	unidentified	unidentified	unidentified	unidentified
ASV4079	0	0	0	0	0	0	0	0	0	0	0	8	0	0	0	0	0	8	Fungi{superkingdom}(94);unidentified{phylum}(94);unidentified{class}(94);unidentified{order}(94);unidentified{family}(94);unidentified{genus}(94);unidentified{species}(94)	Fungi	unidentified	unidentified	unidentified	unidentified	unidentified	unidentified
ASV4113	0	0	0	0	0	0	0	0	0	0	0	0	8	0	0	0	0	8	Fungi{superkingdom}(80);unidentified{phylum}(80);unidentified{class}(80);unidentified{order}(80);unidentified{family}(80);unidentified{genus}(80);unidentified{species}(80)	Fungi	unidentified	unidentified	unidentified	unidentified	unidentified	unidentified
ASV4114	0	0	0	0	0	0	0	0	0	0	0	0	0	0	0	8	0	8	Fungi{superkingdom}(100);Ascomycota{phylum}(100);Orbiliomycetes{class}(100);Orbiliales{order}(100);Orbiliaceae{family}(100);Arthrobotrys{genus}(100);Arthrobotrys_conoides{species}(100)	Fungi	Ascomycota	Orbiliomycetes	Orbiliales	Orbiliaceae	Arthrobotrys	Arthrobotrys_conoides
ASV4115	0	0	0	0	0	0	0	0	0	0	0	0	0	0	0	0	8	8	Fungi{superkingdom}(100);Ascomycota{phylum}(100);Dothideomycetes{class}(100);Pleosporales{order}(100);Didymellaceae{family}(100);Unassigned{genus}(0);Unassigned{species}(0)	Fungi	Ascomycota	Dothideomycetes	Pleosporales	Didymellaceae	Unassigned	Unassigned
ASV4116	0	0	0	0	0	0	0	0	0	0	0	0	0	0	0	0	8	8	Fungi{superkingdom}(65);Ascomycota{phylum}(65);Dothideomycetes{class}(65);Capnodiales{order}(65);Cladosporiaceae{family}(65);Cladosporium{genus}(65);Cladosporium_tenuissimum{species}(65)	Fungi	Ascomycota	Dothideomycetes	Capnodiales	Cladosporiaceae	Cladosporium	Cladosporium_tenuissimum
ASV4117	7	0	0	0	0	0	0	0	0	0	0	0	0	0	0	0	0	7	Fungi{superkingdom}(67);Basidiomycota{phylum}(67);Cystobasidiomycetes{class}(67);Unassigned{order}(0);Unassigned{family}(0);Unassigned{genus}(0);Unassigned{species}(0)	Fungi	Basidiomycota	Cystobasidiomycetes	Unassigned	Unassigned	Unassigned	Unassigned
ASV4118	0	7	0	0	0	0	0	0	0	0	0	0	0	0	0	0	0	7	Fungi{superkingdom}(73);Ascomycota{phylum}(73);Sordariomycetes{class}(73);Sordariales{order}(73);Chaetomiaceae{family}(73);Unassigned{genus}(0);Unassigned{species}(0)	Fungi	Ascomycota	Sordariomycetes	Sordariales	Chaetomiaceae	Unassigned	Unassigned
ASV4119	0	7	0	0	0	0	0	0	0	0	0	0	0	0	0	0	0	7	Fungi{superkingdom}(100);Ascomycota{phylum}(100);Sordariomycetes{class}(100);Sordariales{order}(100);Chaetomiaceae{family}(100);Unassigned{genus}(0);Unassigned{species}(0)	Fungi	Ascomycota	Sordariomycetes	Sordariales	Chaetomiaceae	Unassigned	Unassigned
ASV4120	0	7	0	0	0	0	0	0	0	0	0	0	0	0	0	0	0	7	Fungi{superkingdom}(70);unidentified{phylum}(70);unidentified{class}(70);unidentified{order}(70);unidentified{family}(70);unidentified{genus}(70);unidentified{species}(70)	Fungi	unidentified	unidentified	unidentified	unidentified	unidentified	unidentified
ASV4121	0	7	0	0	0	0	0	0	0	0	0	0	0	0	0	0	0	7	Fungi{superkingdom}(99);Ascomycota{phylum}(99);Dothideomycetes{class}(99);Pleosporales{order}(99);Didymellaceae{family}(99);Unassigned{genus}(0);Unassigned{species}(0)	Fungi	Ascomycota	Dothideomycetes	Pleosporales	Didymellaceae	Unassigned	Unassigned
ASV4122	0	5	0	0	0	0	0	0	0	0	0	0	0	0	0	0	0	5	Fungi{superkingdom}(92);unidentified{phylum}(92);unidentified{class}(92);unidentified{order}(92);unidentified{family}(92);unidentified{genus}(92);unidentified{species}(92)	Fungi	unidentified	unidentified	unidentified	unidentified	unidentified	unidentified
ASV4123	0	3	0	0	0	0	0	0	0	0	0	0	0	0	0	0	0	3	Fungi{superkingdom}(100);Ascomycota{phylum}(100);Leotiomycetes{class}(100);Erysiphales{order}(100);Erysiphaceae{family}(100);Blumeria{genus}(100);Blumeria_graminis{species}(100)	Fungi	Ascomycota	Leotiomycetes	Erysiphales	Erysiphaceae	Blumeria	Blumeria_graminis
ASV4124	0	0	0	7	0	0	0	0	0	0	0	0	0	0	0	0	0	7	Fungi{superkingdom}(78);unidentified{phylum}(78);unidentified{class}(78);unidentified{order}(78);unidentified{family}(78);unidentified{genus}(78);unidentified{species}(78)	Fungi	unidentified	unidentified	unidentified	unidentified	unidentified	unidentified
ASV4125	0	0	0	0	7	0	0	0	0	0	0	0	0	0	0	0	0	7	Fungi{superkingdom}(98);Ascomycota{phylum}(98);Eurotiomycetes{class}(98);Chaetothyriales{order}(98);unidentified{family}(98);unidentified{genus}(98);unidentified{species}(98)	Fungi	Ascomycota	Eurotiomycetes	Chaetothyriales	unidentified	unidentified	unidentified
ASV4126	0	0	0	0	7	0	0	0	0	0	0	0	0	0	0	0	0	7	Fungi{superkingdom}(63);unidentified{phylum}(63);unidentified{class}(63);unidentified{order}(63);unidentified{family}(63);unidentified{genus}(63);unidentified{species}(63)	Fungi	unidentified	unidentified	unidentified	unidentified	unidentified	unidentified
ASV4127	0	0	0	0	0	7	0	0	0	0	0	0	0	0	0	0	0	7	Fungi{superkingdom}(100);Basidiomycota{phylum}(100);Agaricomycetes{class}(100);Polyporales{order}(100);Irpicaceae{family}(100);Ceriporia{genus}(100);Ceriporia_xylostromatoides{species}(100)	Fungi	Basidiomycota	Agaricomycetes	Polyporales	Irpicaceae	Ceriporia	Ceriporia_xylostromatoides
ASV4128	0	0	0	0	0	7	0	0	0	0	0	0	0	0	0	0	0	7	Fungi{superkingdom}(77);Ascomycota{phylum}(77);Dothideomycetes{class}(77);Pleosporales{order}(77);Lentitheciaceae{family}(77);Keissleriella{genus}(77);Keissleriella_caraganae{species}(77)	Fungi	Ascomycota	Dothideomycetes	Pleosporales	Lentitheciaceae	Keissleriella	Keissleriella_caraganae
ASV4129	0	0	0	0	0	7	0	0	0	0	0	0	0	0	0	0	0	7	Fungi{superkingdom}(69);unidentified{phylum}(69);unidentified{class}(69);unidentified{order}(69);unidentified{family}(69);unidentified{genus}(69);unidentified{species}(69)	Fungi	unidentified	unidentified	unidentified	unidentified	unidentified	unidentified
ASV4244	0	0	0	0	0	0	0	7	0	0	0	0	0	0	0	0	0	7	Fungi{superkingdom}(92);unidentified{phylum}(92);unidentified{class}(92);unidentified{order}(92);unidentified{family}(92);unidentified{genus}(92);unidentified{species}(92)	Fungi	unidentified	unidentified	unidentified	unidentified	unidentified	unidentified
ASV4245	0	0	0	0	0	0	0	0	7	0	0	0	0	0	0	0	0	7	Fungi{superkingdom}(100);Unassigned{phylum}(0);Unassigned{class}(0);Unassigned{order}(0);Unassigned{family}(0);Unassigned{genus}(0);Unassigned{species}(0)	Fungi	Unassigned	Unassigned	Unassigned	Unassigned	Unassigned	Unassigned
ASV4247	0	0	0	0	0	0	0	0	0	0	0	7	0	0	0	0	0	7	Fungi{superkingdom}(78);Ascomycota{phylum}(78);Sordariomycetes{class}(78);Unassigned{order}(0);Unassigned{family}(0);Unassigned{genus}(0);Unassigned{species}(0)	Fungi	Ascomycota	Sordariomycetes	Unassigned	Unassigned	Unassigned	Unassigned
ASV4296	0	0	0	0	0	0	0	0	0	0	0	0	7	0	0	0	0	7	Fungi{superkingdom}(88);Ascomycota{phylum}(88);Eurotiomycetes{class}(88);Eurotiales{order}(88);Aspergillaceae{family}(88);Unassigned{genus}(0);Unassigned{species}(0)	Fungi	Ascomycota	Eurotiomycetes	Eurotiales	Aspergillaceae	Unassigned	Unassigned
ASV4297	0	0	0	0	0	0	0	0	0	0	0	0	0	0	7	0	0	7	Fungi{superkingdom}(70);unidentified{phylum}(70);unidentified{class}(70);unidentified{order}(70);unidentified{family}(70);unidentified{genus}(70);unidentified{species}(70)	Fungi	unidentified	unidentified	unidentified	unidentified	unidentified	unidentified
ASV4298	0	0	0	0	0	0	0	0	0	0	0	0	0	0	0	7	0	7	Fungi{superkingdom}(83);unidentified{phylum}(83);unidentified{class}(83);unidentified{order}(83);unidentified{family}(83);unidentified{genus}(83);unidentified{species}(83)	Fungi	unidentified	unidentified	unidentified	unidentified	unidentified	unidentified
ASV4299	0	0	0	0	0	0	0	0	0	0	0	0	0	0	0	7	0	7	Fungi{superkingdom}(100);Ascomycota{phylum}(100);Sordariomycetes{class}(100);Xylariales{order}(100);Xylariales_fam_Incertae_sedis{family}(100);Hansfordia{genus}(100);unidentified{species}(100)	Fungi	Ascomycota	Sordariomycetes	Xylariales	Xylariales_fam_Incertae_sedis	Hansfordia	unidentified
ASV4300	0	0	0	0	0	0	0	0	0	0	0	0	0	0	0	7	0	7	Fungi{superkingdom}(75);unidentified{phylum}(75);unidentified{class}(75);unidentified{order}(75);unidentified{family}(75);unidentified{genus}(75);unidentified{species}(75)	Fungi	unidentified	unidentified	unidentified	unidentified	unidentified	unidentified
ASV4301	0	0	0	0	0	0	0	0	0	0	0	0	0	0	0	7	0	7	Fungi{superkingdom}(99);Ascomycota{phylum}(99);Leotiomycetes{class}(99);Erysiphales{order}(99);Erysiphaceae{family}(99);Microsphaera{genus}(99);Microsphaera_juglandis{species}(99)	Fungi	Ascomycota	Leotiomycetes	Erysiphales	Erysiphaceae	Microsphaera	Microsphaera_juglandis
ASV4302	0	0	0	0	0	0	0	0	0	0	0	0	0	0	0	0	7	7	Fungi{superkingdom}(62);unidentified{phylum}(62);unidentified{class}(62);unidentified{order}(62);unidentified{family}(62);unidentified{genus}(62);unidentified{species}(62)	Fungi	unidentified	unidentified	unidentified	unidentified	unidentified	unidentified
ASV4303	6	0	0	0	0	0	0	0	0	0	0	0	0	0	0	0	0	6	Fungi{superkingdom}(72);unidentified{phylum}(72);unidentified{class}(72);unidentified{order}(72);unidentified{family}(72);unidentified{genus}(72);unidentified{species}(72)	Fungi	unidentified	unidentified	unidentified	unidentified	unidentified	unidentified
ASV4304	6	0	0	0	0	0	0	0	0	0	0	0	0	0	0	0	0	6	Fungi{superkingdom}(100);Basidiomycota{phylum}(100);Agaricomycetes{class}(100);Hymenochaetales{order}(100);Schizoporaceae{family}(100);Hyphodontia{genus}(100);Hyphodontia_microspora{species}(100)	Fungi	Basidiomycota	Agaricomycetes	Hymenochaetales	Schizoporaceae	Hyphodontia	Hyphodontia_microspora
ASV4305	6	0	0	0	0	0	0	0	0	0	0	0	0	0	0	0	0	6	Fungi{superkingdom}(61);unidentified{phylum}(61);unidentified{class}(61);unidentified{order}(61);unidentified{family}(61);unidentified{genus}(61);unidentified{species}(61)	Fungi	unidentified	unidentified	unidentified	unidentified	unidentified	unidentified
ASV4306	4	0	0	0	0	0	0	0	0	0	0	0	0	0	0	0	0	4	Fungi{superkingdom}(95);Ascomycota{phylum}(95);Eurotiomycetes{class}(95);Eurotiales{order}(95);Aspergillaceae{family}(95);Aspergillus{genus}(95);Aspergillus_protuberus{species}(95)	Fungi	Ascomycota	Eurotiomycetes	Eurotiales	Aspergillaceae	Aspergillus	Aspergillus_protuberus
ASV4307	0	6	0	0	0	0	0	0	0	0	0	0	0	0	0	0	0	6	Fungi{superkingdom}(97);unidentified{phylum}(97);unidentified{class}(97);unidentified{order}(97);unidentified{family}(97);unidentified{genus}(97);unidentified{species}(97)	Fungi	unidentified	unidentified	unidentified	unidentified	unidentified	unidentified
ASV4308	0	6	0	0	0	0	0	0	0	0	0	0	0	0	0	0	0	6	Fungi{superkingdom}(100);Ascomycota{phylum}(100);Leotiomycetes{class}(100);Helotiales{order}(100);Helotiaceae{family}(100);Scytalidium{genus}(100);unidentified{species}(100)	Fungi	Ascomycota	Leotiomycetes	Helotiales	Helotiaceae	Scytalidium	unidentified
ASV4309	0	6	0	0	0	0	0	0	0	0	0	0	0	0	0	0	0	6	Fungi{superkingdom}(91);Ascomycota{phylum}(91);Eurotiomycetes{class}(91);Chaetothyriales{order}(91);Trichomeriaceae{family}(91);Knufia{genus}(91);Knufia_tsunedae{species}(91)	Fungi	Ascomycota	Eurotiomycetes	Chaetothyriales	Trichomeriaceae	Knufia	Knufia_tsunedae
ASV4310	0	6	0	0	0	0	0	0	0	0	0	0	0	0	0	0	0	6	Fungi{superkingdom}(100);Ascomycota{phylum}(100);Dothideomycetes{class}(100);Pleosporales{order}(100);Phaeosphaeriaceae{family}(100);Phaeosphaeria{genus}(100);Unassigned{species}(0)	Fungi	Ascomycota	Dothideomycetes	Pleosporales	Phaeosphaeriaceae	Phaeosphaeria	Unassigned
ASV4311	0	6	0	0	0	0	0	0	0	0	0	0	0	0	0	0	0	6	Fungi{superkingdom}(90);Ascomycota{phylum}(90);Unassigned{class}(0);Unassigned{order}(0);Unassigned{family}(0);Unassigned{genus}(0);Unassigned{species}(0)	Fungi	Ascomycota	Unassigned	Unassigned	Unassigned	Unassigned	Unassigned
ASV4312	0	6	0	0	0	0	0	0	0	0	0	0	0	0	0	0	0	6	Fungi{superkingdom}(97);Ascomycota{phylum}(97);Sordariomycetes{class}(97);Coniochaetales{order}(97);Coniochaetaceae{family}(97);Coniochaeta{genus}(97);Coniochaeta_canina{species}(97)	Fungi	Ascomycota	Sordariomycetes	Coniochaetales	Coniochaetaceae	Coniochaeta	Coniochaeta_canina
ASV4313	0	0	6	0	0	0	0	0	0	0	0	0	0	0	0	0	0	6	Fungi{superkingdom}(62);Basidiomycota{phylum}(62);Agaricomycetes{class}(62);unidentified{order}(62);unidentified{family}(62);unidentified{genus}(62);unidentified{species}(62)	Fungi	Basidiomycota	Agaricomycetes	unidentified	unidentified	unidentified	unidentified
ASV4314	0	0	6	0	0	0	0	0	0	0	0	0	0	0	0	0	0	6	Fungi{superkingdom}(99);Ascomycota{phylum}(99);Sordariomycetes{class}(99);Hypocreales{order}(99);Hypocreales_fam_Incertae_sedis{family}(99);Acremonium{genus}(99);Acremonium_charticola{species}(99)	Fungi	Ascomycota	Sordariomycetes	Hypocreales	Hypocreales_fam_Incertae_sedis	Acremonium	Acremonium_charticola
ASV4315	0	0	0	6	0	0	0	0	0	0	0	0	0	0	0	0	0	6	Fungi{superkingdom}(100);Ascomycota{phylum}(100);Dothideomycetes{class}(100);Pleosporales{order}(100);Sporormiaceae{family}(100);Sparticola{genus}(100);Sparticola_forlicesenae{species}(100)	Fungi	Ascomycota	Dothideomycetes	Pleosporales	Sporormiaceae	Sparticola	Sparticola_forlicesenae
ASV4316	0	0	0	6	0	0	0	0	0	0	0	0	0	0	0	0	0	6	Fungi{superkingdom}(100);Unassigned{phylum}(0);Unassigned{class}(0);Unassigned{order}(0);Unassigned{family}(0);Unassigned{genus}(0);Unassigned{species}(0)	Fungi	Unassigned	Unassigned	Unassigned	Unassigned	Unassigned	Unassigned
ASV4317	0	0	0	6	0	0	0	0	0	0	0	0	0	0	0	0	0	6	Fungi{superkingdom}(100);Unassigned{phylum}(0);Unassigned{class}(0);Unassigned{order}(0);Unassigned{family}(0);Unassigned{genus}(0);Unassigned{species}(0)	Fungi	Unassigned	Unassigned	Unassigned	Unassigned	Unassigned	Unassigned
ASV4318	0	0	0	0	6	0	0	0	0	0	0	0	0	0	0	0	0	6	Fungi{superkingdom}(73);unidentified{phylum}(73);unidentified{class}(73);unidentified{order}(73);unidentified{family}(73);unidentified{genus}(73);unidentified{species}(73)	Fungi	unidentified	unidentified	unidentified	unidentified	unidentified	unidentified
ASV4319	0	0	0	0	6	0	0	0	0	0	0	0	0	0	0	0	0	6	Fungi{superkingdom}(62);unidentified{phylum}(62);unidentified{class}(62);unidentified{order}(62);unidentified{family}(62);unidentified{genus}(62);unidentified{species}(62)	Fungi	unidentified	unidentified	unidentified	unidentified	unidentified	unidentified
ASV4320	0	0	0	0	6	0	0	0	0	0	0	0	0	0	0	0	0	6	Fungi{superkingdom}(96);Ascomycota{phylum}(96);Eurotiomycetes{class}(96);Chaetothyriales{order}(96);Herpotrichiellaceae{family}(96);Exophiala{genus}(96);Exophiala_radicis{species}(96)	Fungi	Ascomycota	Eurotiomycetes	Chaetothyriales	Herpotrichiellaceae	Exophiala	Exophiala_radicis
ASV4321	0	0	0	0	6	0	0	0	0	0	0	0	0	0	0	0	0	6	Fungi{superkingdom}(76);unidentified{phylum}(76);unidentified{class}(76);unidentified{order}(76);unidentified{family}(76);unidentified{genus}(76);unidentified{species}(76)	Fungi	unidentified	unidentified	unidentified	unidentified	unidentified	unidentified
ASV4322	0	0	0	0	0	6	0	0	0	0	0	0	0	0	0	0	0	6	Fungi{superkingdom}(99);unidentified{phylum}(99);unidentified{class}(99);unidentified{order}(99);unidentified{family}(99);unidentified{genus}(99);unidentified{species}(99)	Fungi	unidentified	unidentified	unidentified	unidentified	unidentified	unidentified
ASV4476	0	0	0	0	0	0	6	0	0	0	0	0	0	0	0	0	0	6	Fungi{superkingdom}(91);unidentified{phylum}(91);unidentified{class}(91);unidentified{order}(91);unidentified{family}(91);unidentified{genus}(91);unidentified{species}(91)	Fungi	unidentified	unidentified	unidentified	unidentified	unidentified	unidentified
ASV4477	0	0	0	0	0	0	0	0	6	0	0	0	0	0	0	0	0	6	Fungi{superkingdom}(91);Ascomycota{phylum}(91);Sordariomycetes{class}(91);Hypocreales{order}(91);Nectriaceae{family}(91);Fusarium{genus}(91);Unassigned{species}(0)	Fungi	Ascomycota	Sordariomycetes	Hypocreales	Nectriaceae	Fusarium	Unassigned
ASV4478	0	0	0	0	0	0	0	0	0	6	0	0	0	0	0	0	0	6	Fungi{superkingdom}(83);Ascomycota{phylum}(83);Dothideomycetes{class}(83);Pleosporales{order}(83);Pleosporaceae{family}(83);Alternaria{genus}(83);Alternaria_alternata{species}(83)	Fungi	Ascomycota	Dothideomycetes	Pleosporales	Pleosporaceae	Alternaria	Alternaria_alternata
ASV4479	0	0	0	0	0	0	0	0	0	0	6	0	0	0	0	0	0	6	Fungi{superkingdom}(78);Ascomycota{phylum}(78);Eurotiomycetes{class}(78);Eurotiales{order}(78);Aspergillaceae{family}(78);Penicillium{genus}(78);Penicillium_griseofulvum{species}(78)	Fungi	Ascomycota	Eurotiomycetes	Eurotiales	Aspergillaceae	Penicillium	Penicillium_griseofulvum
ASV4480	0	0	0	0	0	0	0	0	0	0	0	6	0	0	0	0	0	6	Fungi{superkingdom}(72);Chytridiomycota{phylum}(72);unidentified{class}(72);unidentified{order}(72);unidentified{family}(72);unidentified{genus}(72);unidentified{species}(72)	Fungi	Chytridiomycota	unidentified	unidentified	unidentified	unidentified	unidentified
ASV4481	0	0	0	0	0	0	0	0	0	0	0	6	0	0	0	0	0	6	Fungi{superkingdom}(66);unidentified{phylum}(66);unidentified{class}(66);unidentified{order}(66);unidentified{family}(66);unidentified{genus}(66);unidentified{species}(66)	Fungi	unidentified	unidentified	unidentified	unidentified	unidentified	unidentified
ASV4548	0	0	0	0	0	0	0	0	0	0	0	0	0	0	0	6	0	6	Fungi{superkingdom}(64);unidentified{phylum}(64);unidentified{class}(64);unidentified{order}(64);unidentified{family}(64);unidentified{genus}(64);unidentified{species}(64)	Fungi	unidentified	unidentified	unidentified	unidentified	unidentified	unidentified
ASV4549	0	0	0	0	0	0	0	0	0	0	0	0	0	0	0	6	0	6	Fungi{superkingdom}(100);Unassigned{phylum}(0);Unassigned{class}(0);Unassigned{order}(0);Unassigned{family}(0);Unassigned{genus}(0);Unassigned{species}(0)	Fungi	Unassigned	Unassigned	Unassigned	Unassigned	Unassigned	Unassigned
ASV4550	0	0	0	0	0	0	0	0	0	0	0	0	0	0	0	6	0	6	Fungi{superkingdom}(64);Ascomycota{phylum}(64);Dothideomycetes{class}(64);Pleosporales{order}(64);Zopfiaceae{family}(64);Didymocrea{genus}(64);Didymocrea_sadasivanii{species}(64)	Fungi	Ascomycota	Dothideomycetes	Pleosporales	Zopfiaceae	Didymocrea	Didymocrea_sadasivanii
ASV4551	5	0	0	0	0	0	0	0	0	0	0	0	0	0	0	0	0	5	Fungi{superkingdom}(100);Unassigned{phylum}(0);Unassigned{class}(0);Unassigned{order}(0);Unassigned{family}(0);Unassigned{genus}(0);Unassigned{species}(0)	Fungi	Unassigned	Unassigned	Unassigned	Unassigned	Unassigned	Unassigned
ASV4552	5	0	0	0	0	0	0	0	0	0	0	0	0	0	0	0	0	5	Fungi{superkingdom}(100);Unassigned{phylum}(0);Unassigned{class}(0);Unassigned{order}(0);Unassigned{family}(0);Unassigned{genus}(0);Unassigned{species}(0)	Fungi	Unassigned	Unassigned	Unassigned	Unassigned	Unassigned	Unassigned
ASV4553	5	0	0	0	0	0	0	0	0	0	0	0	0	0	0	0	0	5	Fungi{superkingdom}(71);unidentified{phylum}(71);unidentified{class}(71);unidentified{order}(71);unidentified{family}(71);unidentified{genus}(71);unidentified{species}(71)	Fungi	unidentified	unidentified	unidentified	unidentified	unidentified	unidentified
ASV4554	5	0	0	0	0	0	0	0	0	0	0	0	0	0	0	0	0	5	Fungi{superkingdom}(100);Unassigned{phylum}(0);Unassigned{class}(0);Unassigned{order}(0);Unassigned{family}(0);Unassigned{genus}(0);Unassigned{species}(0)	Fungi	Unassigned	Unassigned	Unassigned	Unassigned	Unassigned	Unassigned
ASV4555	5	0	0	0	0	0	0	0	0	0	0	0	0	0	0	0	0	5	Fungi{superkingdom}(63);unidentified{phylum}(63);unidentified{class}(63);unidentified{order}(63);unidentified{family}(63);unidentified{genus}(63);unidentified{species}(63)	Fungi	unidentified	unidentified	unidentified	unidentified	unidentified	unidentified
ASV4556	5	0	0	0	0	0	0	0	0	0	0	0	0	0	0	0	0	5	Fungi{superkingdom}(100);Ascomycota{phylum}(100);Arthoniomycetes{class}(100);Lichenostigmatales{order}(100);Phaeococcomycetaceae{family}(100);Phaeococcomyces{genus}(100);Phaeococcomyces_mexicanus{species}(100)	Fungi	Ascomycota	Arthoniomycetes	Lichenostigmatales	Phaeococcomycetaceae	Phaeococcomyces	Phaeococcomyces_mexicanus
[truncated: 115 more rows]
