# Supplementary material for: Years of sand fixation with Caragana korshinskii drive the enrichment of its rhizosphere functional microbes by accumulating soil N
Source: PeerJ journal article supplement (doi:10.7717/peerj.14271), 2022-11-01
Supplement: ASV_of_fungi_in_summer.xlsx [file ASV_of_fungi_in_summer.xlsx]

## Sheet: OTU of fungi in summer
#OTU ID	Ck18-1	Ck18-2	Ck18-3	Ck18-4	Ck18-5	Ck12-1	Ck12-2	Ck12-3	Ck12-4	Ck12-5	Ck6-1	Ck6-2	Ck6-3	Ck6-4	Ck6-5	OTUsize	Taxonomy	superkingdom	phylum	class	order	family	genus	species
ASV1	21046	561	16114	22238	9373	6788	26025	9611	7066	2113	18881	21349	182	364	0	161711	Fungi{superkingdom}(77);Ascomycota{phylum}(77);Eurotiomycetes{class}(77);Eurotiales{order}(77);Aspergillaceae{family}(77);Penicillium{genus}(77);Penicillium_griseofulvum{species}(77)	Fungi	Ascomycota	Eurotiomycetes	Eurotiales	Aspergillaceae	Penicillium	Penicillium_griseofulvum
ASV2	22	278	48	284	310	98	31	49	62	279	28	871	531	1142	0	4033	Fungi{superkingdom}(87);Ascomycota{phylum}(87);Dothideomycetes{class}(87);Pleosporales{order}(87);Pleosporales_fam_Incertae_sedis{family}(87);Thyrostroma{genus}(87);Thyrostroma_cornicola{species}(87)	Fungi	Ascomycota	Dothideomycetes	Pleosporales	Pleosporales_fam_Incertae_sedis	Thyrostroma	Thyrostroma_cornicola
ASV3	450	826	987	548	437	354	291	802	1258	399	379	905	1208	256	663	9763	Fungi{superkingdom}(88);Ascomycota{phylum}(88);Dothideomycetes{class}(88);Pleosporales{order}(88);Pleosporaceae{family}(88);Alternaria{genus}(88);Alternaria_alternata{species}(88)	Fungi	Ascomycota	Dothideomycetes	Pleosporales	Pleosporaceae	Alternaria	Alternaria_alternata
ASV4	18836	8651	6827	5640	7589	8497	18430	4840	0	372	1466	275	0	642	6100	88165	Fungi{superkingdom}(89);Ascomycota{phylum}(89);Sordariomycetes{class}(89);Hypocreales{order}(89);Nectriaceae{family}(89);Fusarium{genus}(89);Fusarium_solani{species}(89)	Fungi	Ascomycota	Sordariomycetes	Hypocreales	Nectriaceae	Fusarium	Fusarium_solani
ASV5	137	1324	206	2393	852	174	73	0	156	3328	0	0	0	166	0	8809	Fungi{superkingdom}(93);Ascomycota{phylum}(93);Dothideomycetes{class}(93);Pleosporales{order}(93);Didymellaceae{family}(93);Nothophoma{genus}(93);Nothophoma_variabilis{species}(93)	Fungi	Ascomycota	Dothideomycetes	Pleosporales	Didymellaceae	Nothophoma	Nothophoma_variabilis
ASV6	3109	473	186	2220	166	0	0	1943	0	860	824	342	0	18960	411	29494	Fungi{superkingdom}(97);Ascomycota{phylum}(97);Sordariomycetes{class}(97);Hypocreales{order}(97);Nectriaceae{family}(97);Fusarium{genus}(97);Unassigned{species}(0)	Fungi	Ascomycota	Sordariomycetes	Hypocreales	Nectriaceae	Fusarium	Unassigned
ASV7	6857	1231	10328	4101	3956	80	52	784	242	975	24231	976	153	2284	230	56480	Fungi{superkingdom}(98);Ascomycota{phylum}(98);Sordariomycetes{class}(98);Hypocreales{order}(98);Nectriaceae{family}(98);Fusarium{genus}(98);Fusarium_solani{species}(98)	Fungi	Ascomycota	Sordariomycetes	Hypocreales	Nectriaceae	Fusarium	Fusarium_solani
ASV8	0	189	2598	8299	580	0	289	4567	8358	2735	0	6063	0	4746	341	38765	Fungi{superkingdom}(78);Ascomycota{phylum}(78);Eurotiomycetes{class}(78);Eurotiales{order}(78);Aspergillaceae{family}(78);Penicillium{genus}(78);Penicillium_griseofulvum{species}(78)	Fungi	Ascomycota	Eurotiomycetes	Eurotiales	Aspergillaceae	Penicillium	Penicillium_griseofulvum
ASV9	769	3924	3888	5072	1731	875	88	568	902	136	9879	0	152	2011	311	30306	Fungi{superkingdom}(98);Ascomycota{phylum}(98);Sordariomycetes{class}(98);Hypocreales{order}(98);Nectriaceae{family}(98);Fusarium{genus}(98);Fusarium_solani{species}(98)	Fungi	Ascomycota	Sordariomycetes	Hypocreales	Nectriaceae	Fusarium	Fusarium_solani
ASV10	0	0	0	12	26	171	23	164	23	50	9	2094	1756	947	0	5275	Fungi{superkingdom}(64);Ascomycota{phylum}(64);Sordariomycetes{class}(64);Hypocreales{order}(64);Bionectriaceae{family}(64);Hydropisphaera{genus}(64);unidentified{species}(64)	Fungi	Ascomycota	Sordariomycetes	Hypocreales	Bionectriaceae	Hydropisphaera	unidentified
ASV11	0	0	0	0	169	67	30	1122	45	121	30	2006	6229	2039	5673	17531	Fungi{superkingdom}(75);Ascomycota{phylum}(75);Sordariomycetes{class}(75);Hypocreales{order}(75);Stachybotryaceae{family}(75);Albifimbria{genus}(75);Albifimbria_verrucaria{species}(75)	Fungi	Ascomycota	Sordariomycetes	Hypocreales	Stachybotryaceae	Albifimbria	Albifimbria_verrucaria
ASV12	60	0	0	0	0	0	0	0	0	0	0	0	0	11	7	78	Fungi{superkingdom}(100);Basidiomycota{phylum}(100);Agaricomycetes{class}(100);Agaricales{order}(100);Omphalotaceae{family}(100);Marasmiellus{genus}(100);Marasmiellus_mesosporus{species}(100)	Fungi	Basidiomycota	Agaricomycetes	Agaricales	Omphalotaceae	Marasmiellus	Marasmiellus_mesosporus
ASV13	1932	1105	9408	1861	2073	10507	0	917	69	0	0	0	0	8097	0	35969	Fungi{superkingdom}(99);Ascomycota{phylum}(99);Sordariomycetes{class}(99);Hypocreales{order}(99);Nectriaceae{family}(99);Fusarium{genus}(99);Fusarium_solani{species}(99)	Fungi	Ascomycota	Sordariomycetes	Hypocreales	Nectriaceae	Fusarium	Fusarium_solani
ASV14	99	777	290	66	51	327	211	1015	676	421	264	628	352	736	316	6229	Fungi{superkingdom}(83);Ascomycota{phylum}(83);Sordariomycetes{class}(83);Hypocreales{order}(83);Nectriaceae{family}(83);Gibberella{genus}(83);Gibberella_avenacea{species}(83)	Fungi	Ascomycota	Sordariomycetes	Hypocreales	Nectriaceae	Gibberella	Gibberella_avenacea
ASV15	134	0	223	47	221	0	0	2833	103	1352	85	412	818	950	351	7529	Fungi{superkingdom}(70);Ascomycota{phylum}(70);Sordariomycetes{class}(70);Hypocreales{order}(70);Nectriaceae{family}(70);Gibberella{genus}(70);Gibberella_intricans{species}(70)	Fungi	Ascomycota	Sordariomycetes	Hypocreales	Nectriaceae	Gibberella	Gibberella_intricans
ASV16	122	432	356	179	85	532	180	695	931	305	178	462	928	210	424	6019	Fungi{superkingdom}(89);Basidiomycota{phylum}(89);Tremellomycetes{class}(89);Filobasidiales{order}(89);Filobasidiaceae{family}(89);Filobasidium{genus}(89);unidentified{species}(89)	Fungi	Basidiomycota	Tremellomycetes	Filobasidiales	Filobasidiaceae	Filobasidium	unidentified
ASV17	0	0	0	70	0	5	0	1194	0	26	0	0	0	0	0	1295	Fungi{superkingdom}(83);Ascomycota{phylum}(83);Eurotiomycetes{class}(83);Eurotiales{order}(83);Trichocomaceae{family}(83);Talaromyces{genus}(83);Talaromyces_aculeatus{species}(83)	Fungi	Ascomycota	Eurotiomycetes	Eurotiales	Trichocomaceae	Talaromyces	Talaromyces_aculeatus
ASV18	0	34	0	194	0	0	0	0	0	0	0	0	0	70	0	298	Fungi{superkingdom}(78);Ascomycota{phylum}(78);Dothideomycetes{class}(78);Pleosporales{order}(78);Didymellaceae{family}(78);Nothophoma{genus}(78);Nothophoma_variabilis{species}(78)	Fungi	Ascomycota	Dothideomycetes	Pleosporales	Didymellaceae	Nothophoma	Nothophoma_variabilis
ASV19	0	0	0	0	80	4	0	0	9	13	0	0	0	0	0	106	Fungi{superkingdom}(65);Ascomycota{phylum}(65);Dothideomycetes{class}(65);Unassigned{order}(0);Unassigned{family}(0);Unassigned{genus}(0);Unassigned{species}(0)	Fungi	Ascomycota	Dothideomycetes	Unassigned	Unassigned	Unassigned	Unassigned
ASV20	86	415	446	49	0	286	101	285	435	162	198	568	301	68	291	3691	Fungi{superkingdom}(97);Chytridiomycota{phylum}(97);Rhizophlyctidomycetes{class}(97);Rhizophlyctidales{order}(97);Rhizophlyctidaceae{family}(97);Rhizophlyctis{genus}(97);unidentified{species}(97)	Fungi	Chytridiomycota	Rhizophlyctidomycetes	Rhizophlyctidales	Rhizophlyctidaceae	Rhizophlyctis	unidentified
ASV22	0	7	500	0	74	330	0	0	0	0	0	0	3	0	0	914	Fungi{superkingdom}(68);unidentified{phylum}(68);unidentified{class}(68);unidentified{order}(68);unidentified{family}(68);unidentified{genus}(68);unidentified{species}(68)	Fungi	unidentified	unidentified	unidentified	unidentified	unidentified	unidentified
ASV23	100	47	146	0	69	0	0	0	0	834	0	0	0	0	0	1196	Fungi{superkingdom}(100);Mortierellomycota{phylum}(100);Mortierellomycetes{class}(100);Mortierellales{order}(100);Mortierellaceae{family}(100);Mortierella{genus}(100);Unassigned{species}(0)	Fungi	Mortierellomycota	Mortierellomycetes	Mortierellales	Mortierellaceae	Mortierella	Unassigned
ASV24	0	42	0	121	21	0	0	0	0	0	0	0	0	2	144	330	Fungi{superkingdom}(77);Ascomycota{phylum}(77);Dothideomycetes{class}(77);Pleosporales{order}(77);Zopfiaceae{family}(77);Didymocrea{genus}(77);Didymocrea_sadasivanii{species}(77)	Fungi	Ascomycota	Dothideomycetes	Pleosporales	Zopfiaceae	Didymocrea	Didymocrea_sadasivanii
ASV25	0	0	0	8	0	0	4	93	0	0	0	0	0	0	0	105	Fungi{superkingdom}(61);Ascomycota{phylum}(61);Sordariomycetes{class}(61);unidentified{order}(61);unidentified{family}(61);unidentified{genus}(61);unidentified{species}(61)	Fungi	Ascomycota	Sordariomycetes	unidentified	unidentified	unidentified	unidentified
ASV26	58	87	158	34	141	0	108	127	125	138	0	0	265	61	86	1388	Fungi{superkingdom}(88);Ascomycota{phylum}(88);Dothideomycetes{class}(88);Capnodiales{order}(88);Cladosporiaceae{family}(88);Cladosporium{genus}(88);Cladosporium_tenuissimum{species}(88)	Fungi	Ascomycota	Dothideomycetes	Capnodiales	Cladosporiaceae	Cladosporium	Cladosporium_tenuissimum
ASV27	0	154	13	40	0	0	0	0	0	0	0	0	0	0	26	233	Fungi{superkingdom}(100);Unassigned{phylum}(0);Unassigned{class}(0);Unassigned{order}(0);Unassigned{family}(0);Unassigned{genus}(0);Unassigned{species}(0)	Fungi	Unassigned	Unassigned	Unassigned	Unassigned	Unassigned	Unassigned
ASV28	11	0	0	91	51	0	40	0	0	1182	0	0	0	0	0	1375	Fungi{superkingdom}(98);Ascomycota{phylum}(98);Eurotiomycetes{class}(98);Eurotiales{order}(98);Aspergillaceae{family}(98);Aspergillus{genus}(98);Aspergillus_pseudodeflectus{species}(98)	Fungi	Ascomycota	Eurotiomycetes	Eurotiales	Aspergillaceae	Aspergillus	Aspergillus_pseudodeflectus
ASV29	106	181	188	132	0	182	0	191	300	169	102	180	714	0	254	2699	Fungi{superkingdom}(100);Ascomycota{phylum}(100);Dothideomycetes{class}(100);Pleosporales{order}(100);Didymellaceae{family}(100);Unassigned{genus}(0);Unassigned{species}(0)	Fungi	Ascomycota	Dothideomycetes	Pleosporales	Didymellaceae	Unassigned	Unassigned
ASV30	35	110	0	44	0	81	0	223	341	77	108	345	318	51	255	1988	Fungi{superkingdom}(99);Ascomycota{phylum}(99);Pezizomycetes{class}(99);Pezizales{order}(99);Pezizaceae{family}(99);unidentified{genus}(99);unidentified{species}(99)	Fungi	Ascomycota	Pezizomycetes	Pezizales	Pezizaceae	unidentified	unidentified
ASV31	0	0	0	0	0	0	0	72	0	0	11	25	0	0	0	108	Fungi{superkingdom}(100);Ascomycota{phylum}(100);Sordariomycetes{class}(100);Sordariales{order}(100);Chaetomiaceae{family}(100);Thielavia{genus}(100);Thielavia_arenaria{species}(100)	Fungi	Ascomycota	Sordariomycetes	Sordariales	Chaetomiaceae	Thielavia	Thielavia_arenaria
ASV32	0	0	84	0	0	0	0	0	0	0	0	0	0	0	0	84	Fungi{superkingdom}(66);Ascomycota{phylum}(66);Unassigned{class}(0);Unassigned{order}(0);Unassigned{family}(0);Unassigned{genus}(0);Unassigned{species}(0)	Fungi	Ascomycota	Unassigned	Unassigned	Unassigned	Unassigned	Unassigned
ASV33	0	0	0	0	43	0	0	0	0	0	0	721	0	0	0	764	Fungi{superkingdom}(100);Unassigned{phylum}(0);Unassigned{class}(0);Unassigned{order}(0);Unassigned{family}(0);Unassigned{genus}(0);Unassigned{species}(0)	Fungi	Unassigned	Unassigned	Unassigned	Unassigned	Unassigned	Unassigned
ASV34	0	0	0	0	2249	3939	2288	988	0	780	0	32	0	143	0	10419	Fungi{superkingdom}(100);Basidiomycota{phylum}(100);Agaricomycetes{class}(100);Agaricales{order}(100);Tricholomataceae{family}(100);Melanoleuca{genus}(100);Melanoleuca_griseobrunnea{species}(100)	Fungi	Basidiomycota	Agaricomycetes	Agaricales	Tricholomataceae	Melanoleuca	Melanoleuca_griseobrunnea
ASV36	0	0	0	0	0	0	0	0	108	0	0	0	0	0	0	108	Fungi{superkingdom}(100);Ascomycota{phylum}(100);Dothideomycetes{class}(100);Pleosporales{order}(100);Sporormiaceae{family}(100);Unassigned{genus}(0);Unassigned{species}(0)	Fungi	Ascomycota	Dothideomycetes	Pleosporales	Sporormiaceae	Unassigned	Unassigned
ASV37	0	0	0	0	0	4958	258	0	1843	0	0	0	4315	0	0	11374	Fungi{superkingdom}(92);Ascomycota{phylum}(92);Sordariomycetes{class}(92);Hypocreales{order}(92);Nectriaceae{family}(92);Fusarium{genus}(92);Fusarium_hostae{species}(92)	Fungi	Ascomycota	Sordariomycetes	Hypocreales	Nectriaceae	Fusarium	Fusarium_hostae
ASV39	66	497	182	28	43	229	134	283	227	117	297	461	292	80	220	3156	Fungi{superkingdom}(100);Mortierellomycota{phylum}(100);Mortierellomycetes{class}(100);Mortierellales{order}(100);Mortierellaceae{family}(100);Mortierella{genus}(100);Mortierella_wolfii{species}(100)	Fungi	Mortierellomycota	Mortierellomycetes	Mortierellales	Mortierellaceae	Mortierella	Mortierella_wolfii
ASV40	0	0	0	0	0	0	5	0	29	67	0	0	0	11	44	156	Fungi{superkingdom}(100);Ascomycota{phylum}(100);Eurotiomycetes{class}(100);Eurotiales{order}(100);Aspergillaceae{family}(100);Penicillium{genus}(100);Unassigned{species}(0)	Fungi	Ascomycota	Eurotiomycetes	Eurotiales	Aspergillaceae	Penicillium	Unassigned
ASV41	0	0	0	3	0	0	0	0	0	0	0	0	0	0	0	3	Fungi{superkingdom}(100);Unassigned{phylum}(0);Unassigned{class}(0);Unassigned{order}(0);Unassigned{family}(0);Unassigned{genus}(0);Unassigned{species}(0)	Fungi	Unassigned	Unassigned	Unassigned	Unassigned	Unassigned	Unassigned
ASV42	0	0	17	0	0	0	0	0	105	0	0	0	0	0	32	154	Fungi{superkingdom}(100);Unassigned{phylum}(0);Unassigned{class}(0);Unassigned{order}(0);Unassigned{family}(0);Unassigned{genus}(0);Unassigned{species}(0)	Fungi	Unassigned	Unassigned	Unassigned	Unassigned	Unassigned	Unassigned
ASV43	0	0	0	0	0	0	0	0	0	0	0	0	0	0	27	27	Fungi{superkingdom}(80);unidentified{phylum}(80);unidentified{class}(80);unidentified{order}(80);unidentified{family}(80);unidentified{genus}(80);unidentified{species}(80)	Fungi	unidentified	unidentified	unidentified	unidentified	unidentified	unidentified
ASV44	0	0	842	0	98	0	0	1933	0	0	0	0	0	318	18559	21750	Fungi{superkingdom}(100);Unassigned{phylum}(0);Unassigned{class}(0);Unassigned{order}(0);Unassigned{family}(0);Unassigned{genus}(0);Unassigned{species}(0)	Fungi	Unassigned	Unassigned	Unassigned	Unassigned	Unassigned	Unassigned
ASV45	0	1749	89	48	1238	2420	5765	646	0	624	0	0	2734	79	0	15392	Fungi{superkingdom}(100);Ascomycota{phylum}(100);Dothideomycetes{class}(100);Pleosporales{order}(100);Phaeosphaeriaceae{family}(100);Paraphoma{genus}(100);Paraphoma_radicina{species}(100)	Fungi	Ascomycota	Dothideomycetes	Pleosporales	Phaeosphaeriaceae	Paraphoma	Paraphoma_radicina
ASV46	0	0	0	42	13347	0	0	17	60	13	0	0	0	5135	29	18643	Fungi{superkingdom}(84);Basidiomycota{phylum}(84);Agaricomycetes{class}(84);Agaricales{order}(84);unidentified{family}(84);unidentified{genus}(84);unidentified{species}(84)	Fungi	Basidiomycota	Agaricomycetes	Agaricales	unidentified	unidentified	unidentified
ASV47	0	0	0	0	0	0	0	103	0	51	0	0	84	0	0	238	Fungi{superkingdom}(79);unidentified{phylum}(79);unidentified{class}(79);unidentified{order}(79);unidentified{family}(79);unidentified{genus}(79);unidentified{species}(79)	Fungi	unidentified	unidentified	unidentified	unidentified	unidentified	unidentified
ASV48	0	0	0	0	26	0	0	9	0	0	0	0	0	0	0	35	Fungi{superkingdom}(80);Ascomycota{phylum}(80);Pezizomycetes{class}(80);Pezizales{order}(80);Pezizaceae{family}(80);Iodophanus{genus}(80);Iodophanus_carneus{species}(80)	Fungi	Ascomycota	Pezizomycetes	Pezizales	Pezizaceae	Iodophanus	Iodophanus_carneus
ASV49	66	296	255	40	25	194	150	435	0	247	144	434	464	94	204	3048	Fungi{superkingdom}(95);Basidiomycota{phylum}(95);Agaricomycetes{class}(95);Cantharellales{order}(95);Ceratobasidiaceae{family}(95);Ceratobasidium{genus}(95);unidentified{species}(95)	Fungi	Basidiomycota	Agaricomycetes	Cantharellales	Ceratobasidiaceae	Ceratobasidium	unidentified
ASV50	42	0	28	9	10	64	0	0	99	46	0	0	0	0	0	298	Fungi{superkingdom}(100);Ascomycota{phylum}(100);Sordariomycetes{class}(100);Hypocreales{order}(100);Hypocreales_fam_Incertae_sedis{family}(100);Acremonium{genus}(100);Acremonium_persicinum{species}(100)	Fungi	Ascomycota	Sordariomycetes	Hypocreales	Hypocreales_fam_Incertae_sedis	Acremonium	Acremonium_persicinum
ASV51	76	414	143	31	16	200	149	299	252	98	184	120	534	150	189	2855	Fungi{superkingdom}(100);Unassigned{phylum}(0);Unassigned{class}(0);Unassigned{order}(0);Unassigned{family}(0);Unassigned{genus}(0);Unassigned{species}(0)	Fungi	Unassigned	Unassigned	Unassigned	Unassigned	Unassigned	Unassigned
ASV53	0	70	0	29	221	0	0	0	0	496	0	0	0	0	0	816	Fungi{superkingdom}(66);Ascomycota{phylum}(66);Dothideomycetes{class}(66);Pleosporales{order}(66);Camarosporidiellaceae{family}(66);Camarosporidiella{genus}(66);Camarosporidiella_mackenziei{species}(66)	Fungi	Ascomycota	Dothideomycetes	Pleosporales	Camarosporidiellaceae	Camarosporidiella	Camarosporidiella_mackenziei
ASV54	0	0	0	0	0	0	0	0	0	146	0	0	109	439	120	814	Fungi{superkingdom}(100);Ascomycota{phylum}(100);Sordariomycetes{class}(100);Hypocreales{order}(100);Stachybotryaceae{family}(100);Unassigned{genus}(0);Unassigned{species}(0)	Fungi	Ascomycota	Sordariomycetes	Hypocreales	Stachybotryaceae	Unassigned	Unassigned
ASV55	30	0	0	159	0	6286	459	850	0	10358	0	0	0	0	0	18142	Fungi{superkingdom}(100);Unassigned{phylum}(0);Unassigned{class}(0);Unassigned{order}(0);Unassigned{family}(0);Unassigned{genus}(0);Unassigned{species}(0)	Fungi	Unassigned	Unassigned	Unassigned	Unassigned	Unassigned	Unassigned
ASV56	0	51	30	16	0	0	0	0	0	14	10	1404	0	5	335	1865	Fungi{superkingdom}(100);Unassigned{phylum}(0);Unassigned{class}(0);Unassigned{order}(0);Unassigned{family}(0);Unassigned{genus}(0);Unassigned{species}(0)	Fungi	Unassigned	Unassigned	Unassigned	Unassigned	Unassigned	Unassigned
ASV57	0	0	0	151	0	0	0	0	0	0	0	0	0	0	0	151	Fungi{superkingdom}(71);Ascomycota{phylum}(71);Pezizomycetes{class}(71);Pezizales{order}(71);Pezizaceae{family}(71);Iodophanus{genus}(71);unidentified{species}(71)	Fungi	Ascomycota	Pezizomycetes	Pezizales	Pezizaceae	Iodophanus	unidentified
ASV58	609	1326	529	0	3372	76	0	0	0	0	0	44	240	0	94	6290	Fungi{superkingdom}(99);Ascomycota{phylum}(99);Leotiomycetes{class}(99);Helotiales{order}(99);Unassigned{family}(0);Unassigned{genus}(0);Unassigned{species}(0)	Fungi	Ascomycota	Leotiomycetes	Helotiales	Unassigned	Unassigned	Unassigned
ASV59	0	55	0	0	0	68	0	0	0	640	0	426	0	247	0	1436	Fungi{superkingdom}(80);Ascomycota{phylum}(80);Sordariomycetes{class}(80);Hypocreales{order}(80);Nectriaceae{family}(80);Gibberella{genus}(80);Gibberella_intricans{species}(80)	Fungi	Ascomycota	Sordariomycetes	Hypocreales	Nectriaceae	Gibberella	Gibberella_intricans
ASV60	31	0	0	25	52	0	44	93	95	65	60	56	157	25	82	785	Fungi{superkingdom}(75);Ascomycota{phylum}(75);Dothideomycetes{class}(75);Dothideales{order}(75);Aureobasidiaceae{family}(75);Kabatiella{genus}(75);Kabatiella_bupleuri{species}(75)	Fungi	Ascomycota	Dothideomycetes	Dothideales	Aureobasidiaceae	Kabatiella	Kabatiella_bupleuri
ASV61	0	0	0	36	10	0	96	180	22	2162	0	0	0	0	0	2506	Fungi{superkingdom}(77);Ascomycota{phylum}(77);Eurotiomycetes{class}(77);Eurotiales{order}(77);Aspergillaceae{family}(77);Aspergillus{genus}(77);Aspergillus_felis{species}(77)	Fungi	Ascomycota	Eurotiomycetes	Eurotiales	Aspergillaceae	Aspergillus	Aspergillus_felis
ASV62	0	0	0	0	0	0	0	1464	0	359	0	0	274	0	0	2097	Fungi{superkingdom}(89);Ascomycota{phylum}(89);Sordariomycetes{class}(89);Sordariales{order}(89);Chaetomiaceae{family}(89);Unassigned{genus}(0);Unassigned{species}(0)	Fungi	Ascomycota	Sordariomycetes	Sordariales	Chaetomiaceae	Unassigned	Unassigned
ASV63	0	49	0	4	0	0	0	19	0	20	32	0	0	0	0	124	Fungi{superkingdom}(96);Basidiomycota{phylum}(96);Agaricomycetes{class}(96);Cantharellales{order}(96);Ceratobasidiaceae{family}(96);Thanatephorus{genus}(96);Thanatephorus_cucumeris{species}(96)	Fungi	Basidiomycota	Agaricomycetes	Cantharellales	Ceratobasidiaceae	Thanatephorus	Thanatephorus_cucumeris
ASV64	0	0	0	0	0	0	0	0	1327	0	0	0	0	0	0	1327	Fungi{superkingdom}(95);Ascomycota{phylum}(95);Dothideomycetes{class}(95);Pleosporales{order}(95);Sporormiaceae{family}(95);unidentified{genus}(95);unidentified{species}(95)	Fungi	Ascomycota	Dothideomycetes	Pleosporales	Sporormiaceae	unidentified	unidentified
ASV65	26	25	0	7	0	0	24	0	47	0	20	23	0	0	0	172	Fungi{superkingdom}(100);Unassigned{phylum}(0);Unassigned{class}(0);Unassigned{order}(0);Unassigned{family}(0);Unassigned{genus}(0);Unassigned{species}(0)	Fungi	Unassigned	Unassigned	Unassigned	Unassigned	Unassigned	Unassigned
ASV66	25	0	0	19	16	0	0	2	0	16	0	0	0	0	0	78	Fungi{superkingdom}(99);Ascomycota{phylum}(99);Dothideomycetes{class}(99);Pleosporales{order}(99);Pleosporaceae{family}(99);Comoclathris{genus}(99);unidentified{species}(99)	Fungi	Ascomycota	Dothideomycetes	Pleosporales	Pleosporaceae	Comoclathris	unidentified
ASV67	0	0	0	0	5	0	0	0	0	0	0	0	0	0	0	5	Fungi{superkingdom}(69);unidentified{phylum}(69);unidentified{class}(69);unidentified{order}(69);unidentified{family}(69);unidentified{genus}(69);unidentified{species}(69)	Fungi	unidentified	unidentified	unidentified	unidentified	unidentified	unidentified
ASV68	27	0	0	0	0	39	0	0	0	15	80	0	115	10	77	363	Fungi{superkingdom}(78);Ascomycota{phylum}(78);Sordariomycetes{class}(78);Xylariales{order}(78);unidentified{family}(78);unidentified{genus}(78);unidentified{species}(78)	Fungi	Ascomycota	Sordariomycetes	Xylariales	unidentified	unidentified	unidentified
ASV69	0	0	0	0	12	0	0	0	0	153	0	37	0	0	0	202	Fungi{superkingdom}(100);Ascomycota{phylum}(100);Dothideomycetes{class}(100);Pleosporales{order}(100);Phaeosphaeriaceae{family}(100);Chaetosphaeronema{genus}(100);unidentified{species}(100)	Fungi	Ascomycota	Dothideomycetes	Pleosporales	Phaeosphaeriaceae	Chaetosphaeronema	unidentified
ASV70	0	0	0	70	0	0	0	0	0	0	0	0	0	0	0	70	Fungi{superkingdom}(99);Ascomycota{phylum}(99);Pezizomycetes{class}(99);Pezizales{order}(99);Pezizales_fam_Incertae_sedis{family}(99);Trichobolus{genus}(99);Trichobolus_zukalii{species}(99)	Fungi	Ascomycota	Pezizomycetes	Pezizales	Pezizales_fam_Incertae_sedis	Trichobolus	Trichobolus_zukalii
ASV71	93	228	94	41	35	184	54	180	437	206	162	282	258	68	116	2438	Fungi{superkingdom}(100);Basidiomycota{phylum}(100);Tremellomycetes{class}(100);Filobasidiales{order}(100);Filobasidiaceae{family}(100);Naganishia{genus}(100);Unassigned{species}(0)	Fungi	Basidiomycota	Tremellomycetes	Filobasidiales	Filobasidiaceae	Naganishia	Unassigned
ASV72	0	0	61	803	337	0	0	0	0	0	0	0	0	0	0	1201	Fungi{superkingdom}(79);Basidiomycota{phylum}(79);Agaricomycetes{class}(79);Sebacinales{order}(79);unidentified{family}(79);unidentified{genus}(79);unidentified{species}(79)	Fungi	Basidiomycota	Agaricomycetes	Sebacinales	unidentified	unidentified	unidentified
ASV74	24	0	0	16	39	0	32	74	0	94	0	29	160	0	0	468	Fungi{superkingdom}(100);Unassigned{phylum}(0);Unassigned{class}(0);Unassigned{order}(0);Unassigned{family}(0);Unassigned{genus}(0);Unassigned{species}(0)	Fungi	Unassigned	Unassigned	Unassigned	Unassigned	Unassigned	Unassigned
ASV75	86	0	38	0	0	0	0	75	61	0	23	29	0	87	21	420	Fungi{superkingdom}(100);Ascomycota{phylum}(100);Dothideomycetes{class}(100);Pleosporales{order}(100);Phaeosphaeriaceae{family}(100);Setophoma{genus}(100);Setophoma_terrestris{species}(100)	Fungi	Ascomycota	Dothideomycetes	Pleosporales	Phaeosphaeriaceae	Setophoma	Setophoma_terrestris
ASV76	14	22	0	7	7	0	0	0	0	10	0	0	0	19	6	85	Fungi{superkingdom}(76);Ascomycota{phylum}(76);Sordariomycetes{class}(76);Hypocreales{order}(76);Stachybotryaceae{family}(76);Alfaria{genus}(76);Alfaria_cyperi-esculenti{species}(76)	Fungi	Ascomycota	Sordariomycetes	Hypocreales	Stachybotryaceae	Alfaria	Alfaria_cyperi-esculenti
ASV77	45	143	91	58	0	258	0	99	242	147	128	0	153	70	157	1591	Fungi{superkingdom}(100);Basidiomycota{phylum}(100);Agaricomycetes{class}(100);Agaricales{order}(100);Entolomataceae{family}(100);Entoloma{genus}(100);Entoloma_rusticoides{species}(100)	Fungi	Basidiomycota	Agaricomycetes	Agaricales	Entolomataceae	Entoloma	Entoloma_rusticoides
ASV79	17	0	0	5	0	0	0	0	0	0	0	0	0	0	0	22	Fungi{superkingdom}(98);Basidiomycota{phylum}(98);Agaricomycetes{class}(98);Agaricales{order}(98);Strophariaceae{family}(98);Deconica{genus}(98);Deconica_xeroderma{species}(98)	Fungi	Basidiomycota	Agaricomycetes	Agaricales	Strophariaceae	Deconica	Deconica_xeroderma
ASV80	0	0	0	14	22	2	0	0	0	10	0	0	0	0	0	48	Fungi{superkingdom}(95);Ascomycota{phylum}(95);Dothideomycetes{class}(95);Pleosporales{order}(95);Dictyosporiaceae{family}(95);Pseudocoleophoma{genus}(95);Pseudocoleophoma_bauhiniae{species}(95)	Fungi	Ascomycota	Dothideomycetes	Pleosporales	Dictyosporiaceae	Pseudocoleophoma	Pseudocoleophoma_bauhiniae
ASV81	0	0	364	2490	26	31	15	0	0	55	0	0	0	14	0	2995	Fungi{superkingdom}(100);Ascomycota{phylum}(100);Sordariomycetes{class}(100);Branch06{order}(100);unidentified{family}(100);unidentified{genus}(100);unidentified{species}(100)	Fungi	Ascomycota	Sordariomycetes	Branch06	unidentified	unidentified	unidentified
ASV82	94	0	200	0	335	184	157	0	249	115	94	0	0	0	127	1555	Fungi{superkingdom}(100);Mortierellomycota{phylum}(100);Mortierellomycetes{class}(100);Mortierellales{order}(100);Mortierellaceae{family}(100);Mortierella{genus}(100);Mortierella_alpina{species}(100)	Fungi	Mortierellomycota	Mortierellomycetes	Mortierellales	Mortierellaceae	Mortierella	Mortierella_alpina
ASV83	0	0	0	0	0	56	21	420	159	176	0	60	106	0	0	998	Fungi{superkingdom}(91);Ascomycota{phylum}(91);Sordariomycetes{class}(91);Hypocreales{order}(91);Stachybotryaceae{family}(91);Stachybotrys{genus}(91);Stachybotrys_chartarum{species}(91)	Fungi	Ascomycota	Sordariomycetes	Hypocreales	Stachybotryaceae	Stachybotrys	Stachybotrys_chartarum
ASV84	0	0	0	6	0	0	0	0	0	0	0	0	0	0	20125	20131	Fungi{superkingdom}(81);Basidiomycota{phylum}(81);Agaricomycetes{class}(81);Agaricales{order}(81);unidentified{family}(81);unidentified{genus}(81);unidentified{species}(81)	Fungi	Basidiomycota	Agaricomycetes	Agaricales	unidentified	unidentified	unidentified
ASV85	0	0	0	7	26	15	0	0	35	18	0	42	0	0	3	146	Fungi{superkingdom}(60);Ascomycota{phylum}(60);Dothideomycetes{class}(60);Pleosporales{order}(60);Pleosporaceae{family}(60);Drechslera{genus}(60);Drechslera_dematioidea{species}(60)	Fungi	Ascomycota	Dothideomycetes	Pleosporales	Pleosporaceae	Drechslera	Drechslera_dematioidea
ASV86	190	199	0	0	7	0	106	0	195	60	0	0	0	92	0	849	Fungi{superkingdom}(71);Ascomycota{phylum}(71);Dothideomycetes{class}(71);Pleosporales{order}(71);Phaeosphaeriaceae{family}(71);Paraphoma{genus}(71);Paraphoma_chlamydocopiosa{species}(71)	Fungi	Ascomycota	Dothideomycetes	Pleosporales	Phaeosphaeriaceae	Paraphoma	Paraphoma_chlamydocopiosa
ASV87	35	251	100	13	0	112	0	234	41	68	126	145	206	52	159	1542	Fungi{superkingdom}(91);Ascomycota{phylum}(91);Sordariomycetes{class}(91);Xylariales{order}(91);Diatrypaceae{family}(91);Monosporascus{genus}(91);unidentified{species}(91)	Fungi	Ascomycota	Sordariomycetes	Xylariales	Diatrypaceae	Monosporascus	unidentified
ASV88	0	0	0	55	166	0	0	0	0	0	61	0	0	0	0	282	Fungi{superkingdom}(100);Unassigned{phylum}(0);Unassigned{class}(0);Unassigned{order}(0);Unassigned{family}(0);Unassigned{genus}(0);Unassigned{species}(0)	Fungi	Unassigned	Unassigned	Unassigned	Unassigned	Unassigned	Unassigned
ASV89	0	73	0	0	0	0	13	0	130	35	12	0	100	0	0	363	Fungi{superkingdom}(100);Ascomycota{phylum}(100);Eurotiomycetes{class}(100);Chaetothyriales{order}(100);Trichomeriaceae{family}(100);Knufia{genus}(100);Knufia_tsunedae{species}(100)	Fungi	Ascomycota	Eurotiomycetes	Chaetothyriales	Trichomeriaceae	Knufia	Knufia_tsunedae
ASV90	78	274	166	0	0	2	57	278	235	116	114	552	278	0	178	2328	Fungi{superkingdom}(78);Basidiomycota{phylum}(78);Agaricomycetes{class}(78);Agaricales{order}(78);Entolomataceae{family}(78);Entoloma{genus}(78);Entoloma_rusticoides{species}(78)	Fungi	Basidiomycota	Agaricomycetes	Agaricales	Entolomataceae	Entoloma	Entoloma_rusticoides
ASV91	0	0	0	0	0	0	0	0	0	0	0	704	0	0	0	704	Fungi{superkingdom}(99);Ascomycota{phylum}(99);Dothideomycetes{class}(99);Pleosporales{order}(99);Sporormiaceae{family}(99);Preussia{genus}(99);Preussia_terricola{species}(99)	Fungi	Ascomycota	Dothideomycetes	Pleosporales	Sporormiaceae	Preussia	Preussia_terricola
ASV93	0	0	0	0	23	0	0	0	0	0	0	0	0	14	25	62	Fungi{superkingdom}(92);Ascomycota{phylum}(92);Sordariomycetes{class}(92);Unassigned{order}(0);Unassigned{family}(0);Unassigned{genus}(0);Unassigned{species}(0)	Fungi	Ascomycota	Sordariomycetes	Unassigned	Unassigned	Unassigned	Unassigned
ASV95	0	0	21	7	0	0	14	0	0	19	10	55	0	0	0	126	Fungi{superkingdom}(100);Unassigned{phylum}(0);Unassigned{class}(0);Unassigned{order}(0);Unassigned{family}(0);Unassigned{genus}(0);Unassigned{species}(0)	Fungi	Unassigned	Unassigned	Unassigned	Unassigned	Unassigned	Unassigned
ASV96	0	154	215	0	36	0	128	247	111	54	0	192	197	0	0	1334	Fungi{superkingdom}(100);Basidiomycota{phylum}(100);Agaricomycetes{class}(100);Agaricales{order}(100);Entolomataceae{family}(100);Entoloma{genus}(100);Entoloma_rusticoides{species}(100)	Fungi	Basidiomycota	Agaricomycetes	Agaricales	Entolomataceae	Entoloma	Entoloma_rusticoides
ASV97	0	1473	66	0	25	718	625	39	20	322	0	0	0	0	0	3288	Fungi{superkingdom}(83);Ascomycota{phylum}(83);Sordariomycetes{class}(83);Hypocreales{order}(83);Nectriaceae{family}(83);Thyronectria{genus}(83);Thyronectria_caraganae{species}(83)	Fungi	Ascomycota	Sordariomycetes	Hypocreales	Nectriaceae	Thyronectria	Thyronectria_caraganae
ASV98	0	0	0	0	11	0	0	0	0	0	0	0	22	1256	30	1319	Fungi{superkingdom}(69);unidentified{phylum}(69);unidentified{class}(69);unidentified{order}(69);unidentified{family}(69);unidentified{genus}(69);unidentified{species}(69)	Fungi	unidentified	unidentified	unidentified	unidentified	unidentified	unidentified
ASV99	0	0	0	7	20	0	0	0	0	0	0	0	0	43	0	70	Fungi{superkingdom}(100);Unassigned{phylum}(0);Unassigned{class}(0);Unassigned{order}(0);Unassigned{family}(0);Unassigned{genus}(0);Unassigned{species}(0)	Fungi	Unassigned	Unassigned	Unassigned	Unassigned	Unassigned	Unassigned
ASV100	0	0	0	0	0	0	0	0	0	13	0	0	0	6	27	46	Fungi{superkingdom}(96);Ascomycota{phylum}(96);Eurotiomycetes{class}(96);Chaetothyriales{order}(96);Trichomeriaceae{family}(96);Knufia{genus}(96);Knufia_tsunedae{species}(96)	Fungi	Ascomycota	Eurotiomycetes	Chaetothyriales	Trichomeriaceae	Knufia	Knufia_tsunedae
ASV101	18	0	0	9	0	0	0	0	0	0	0	0	0	0	0	27	Fungi{superkingdom}(100);Unassigned{phylum}(0);Unassigned{class}(0);Unassigned{order}(0);Unassigned{family}(0);Unassigned{genus}(0);Unassigned{species}(0)	Fungi	Unassigned	Unassigned	Unassigned	Unassigned	Unassigned	Unassigned
ASV102	0	0	0	0	0	0	0	0	0	0	0	0	0	0	27	27	Fungi{superkingdom}(60);Ascomycota{phylum}(60);Sordariomycetes{class}(60);unidentified{order}(60);unidentified{family}(60);unidentified{genus}(60);unidentified{species}(60)	Fungi	Ascomycota	Sordariomycetes	unidentified	unidentified	unidentified	unidentified
ASV105	0	0	12	0	0	0	0	0	0	0	0	0	0	0	0	12	Fungi{superkingdom}(100);Ascomycota{phylum}(100);Dothideomycetes{class}(100);Pleosporales{order}(100);Lophiostomataceae{family}(100);Unassigned{genus}(0);Unassigned{species}(0)	Fungi	Ascomycota	Dothideomycetes	Pleosporales	Lophiostomataceae	Unassigned	Unassigned
ASV107	0	0	0	0	0	0	0	11	0	0	0	0	0	0	0	11	Fungi{superkingdom}(64);unidentified{phylum}(64);unidentified{class}(64);unidentified{order}(64);unidentified{family}(64);unidentified{genus}(64);unidentified{species}(64)	Fungi	unidentified	unidentified	unidentified	unidentified	unidentified	unidentified
ASV108	66	0	58	93	0	0	0	323	0	24	0	0	0	0	0	564	Fungi{superkingdom}(100);Calcarisporiellomycota{phylum}(100);Calcarisporiellomycetes{class}(100);Calcarisporiellales{order}(100);Calcarisporiellaceae{family}(100);Calcarisporiella{genus}(100);Calcarisporiella_thermophila{species}(100)	Fungi	Calcarisporiellomycota	Calcarisporiellomycetes	Calcarisporiellales	Calcarisporiellaceae	Calcarisporiella	Calcarisporiella_thermophila
ASV109	95	1150	0	0	0	0	0	0	0	0	0	0	46	0	0	1291	Fungi{superkingdom}(100);Ascomycota{phylum}(100);Sordariomycetes{class}(100);Branch06{order}(100);unidentified{family}(100);unidentified{genus}(100);unidentified{species}(100)	Fungi	Ascomycota	Sordariomycetes	Branch06	unidentified	unidentified	unidentified
ASV110	0	0	65	25	0	0	59	0	419	0	0	0	0	0	0	568	Fungi{superkingdom}(62);unidentified{phylum}(62);unidentified{class}(62);unidentified{order}(62);unidentified{family}(62);unidentified{genus}(62);unidentified{species}(62)	Fungi	unidentified	unidentified	unidentified	unidentified	unidentified	unidentified
ASV111	51	0	0	0	0	0	0	0	0	0	0	0	0	15	40	106	Fungi{superkingdom}(92);Ascomycota{phylum}(92);Sordariomycetes{class}(92);Sordariales{order}(92);Chaetomiaceae{family}(92);Zopfiella{genus}(92);unidentified{species}(92)	Fungi	Ascomycota	Sordariomycetes	Sordariales	Chaetomiaceae	Zopfiella	unidentified
ASV112	43	221	88	0	0	0	105	0	495	112	52	130	218	59	0	1523	Fungi{superkingdom}(73);Ascomycota{phylum}(73);Sordariomycetes{class}(73);Hypocreales{order}(73);Clavicipitaceae{family}(73);Metarhizium{genus}(73);Metarhizium_anisopliae{species}(73)	Fungi	Ascomycota	Sordariomycetes	Hypocreales	Clavicipitaceae	Metarhizium	Metarhizium_anisopliae
ASV114	0	202	0	230	0	0	0	0	0	0	7	0	0	0	0	439	Fungi{superkingdom}(99);Ascomycota{phylum}(99);Dothideomycetes{class}(99);Pleosporales{order}(99);Lophiostomataceae{family}(99);Unassigned{genus}(0);Unassigned{species}(0)	Fungi	Ascomycota	Dothideomycetes	Pleosporales	Lophiostomataceae	Unassigned	Unassigned
ASV115	0	0	0	6	0	0	0	34	0	0	0	0	0	0	0	40	Fungi{superkingdom}(100);Chytridiomycota{phylum}(100);Chytridiomycetes{class}(100);Chytridiales{order}(100);Chytridiaceae{family}(100);Phlyctochytrium{genus}(100);Phlyctochytrium_californicum{species}(100)	Fungi	Chytridiomycota	Chytridiomycetes	Chytridiales	Chytridiaceae	Phlyctochytrium	Phlyctochytrium_californicum
ASV116	70	0	0	0	0	0	0	0	0	0	0	0	0	0	0	70	Fungi{superkingdom}(63);Basidiomycota{phylum}(63);Agaricomycetes{class}(63);unidentified{order}(63);unidentified{family}(63);unidentified{genus}(63);unidentified{species}(63)	Fungi	Basidiomycota	Agaricomycetes	unidentified	unidentified	unidentified	unidentified
ASV117	0	144	141	654	275	213	525	95	211	6	1098	0	622	431	454	4869	Fungi{superkingdom}(100);Ascomycota{phylum}(100);Sordariomycetes{class}(100);Hypocreales{order}(100);Hypocreales_fam_Incertae_sedis{family}(100);Sarocladium{genus}(100);Sarocladium_kiliense{species}(100)	Fungi	Ascomycota	Sordariomycetes	Hypocreales	Hypocreales_fam_Incertae_sedis	Sarocladium	Sarocladium_kiliense
ASV118	0	0	0	0	0	0	0	0	0	0	0	0	504	0	0	504	Fungi{superkingdom}(100);Ascomycota{phylum}(100);Dothideomycetes{class}(100);Pleosporales{order}(100);Sporormiaceae{family}(100);Unassigned{genus}(0);Unassigned{species}(0)	Fungi	Ascomycota	Dothideomycetes	Pleosporales	Sporormiaceae	Unassigned	Unassigned
ASV121	0	0	88	127	0	233	0	0	0	0	0	0	76	0	0	524	Fungi{superkingdom}(63);Basidiomycota{phylum}(63);Agaricomycetes{class}(63);Unassigned{order}(0);Unassigned{family}(0);Unassigned{genus}(0);Unassigned{species}(0)	Fungi	Basidiomycota	Agaricomycetes	Unassigned	Unassigned	Unassigned	Unassigned
ASV122	0	0	0	5	0	0	0	0	0	0	0	0	0	0	0	5	Fungi{superkingdom}(100);Basidiomycota{phylum}(100);Agaricomycetes{class}(100);Polyporales{order}(100);Meruliaceae{family}(100);Hydnophlebia{genus}(100);Hydnophlebia_omnivora{species}(100)	Fungi	Basidiomycota	Agaricomycetes	Polyporales	Meruliaceae	Hydnophlebia	Hydnophlebia_omnivora
ASV123	0	27	0	0	0	12	0	0	0	548	0	0	98	17	70	772	Fungi{superkingdom}(70);Ascomycota{phylum}(70);Dothideomycetes{class}(70);Pleosporales{order}(70);Phaeosphaeriaceae{family}(70);Paraphoma{genus}(70);Paraphoma_pye{species}(70)	Fungi	Ascomycota	Dothideomycetes	Pleosporales	Phaeosphaeriaceae	Paraphoma	Paraphoma_pye
ASV124	0	0	53	0	0	0	0	14	0	570	0	0	0	0	0	637	Fungi{superkingdom}(87);Ascomycota{phylum}(87);Sordariomycetes{class}(87);unidentified{order}(87);unidentified{family}(87);unidentified{genus}(87);unidentified{species}(87)	Fungi	Ascomycota	Sordariomycetes	unidentified	unidentified	unidentified	unidentified
ASV125	126	0	148	49	207	0	0	0	0	0	0	0	0	0	0	530	Fungi{superkingdom}(100);Unassigned{phylum}(0);Unassigned{class}(0);Unassigned{order}(0);Unassigned{family}(0);Unassigned{genus}(0);Unassigned{species}(0)	Fungi	Unassigned	Unassigned	Unassigned	Unassigned	Unassigned	Unassigned
ASV126	0	59	18	0	0	0	0	31	42	0	0	72	0	5	0	227	Fungi{superkingdom}(100);Unassigned{phylum}(0);Unassigned{class}(0);Unassigned{order}(0);Unassigned{family}(0);Unassigned{genus}(0);Unassigned{species}(0)	Fungi	Unassigned	Unassigned	Unassigned	Unassigned	Unassigned	Unassigned
ASV127	0	0	0	0	0	0	0	0	0	0	0	19	0	0	0	19	Fungi{superkingdom}(100);Unassigned{phylum}(0);Unassigned{class}(0);Unassigned{order}(0);Unassigned{family}(0);Unassigned{genus}(0);Unassigned{species}(0)	Fungi	Unassigned	Unassigned	Unassigned	Unassigned	Unassigned	Unassigned
ASV128	25	510	12	0	0	61	54	159	80	0	0	172	142	17	40	1272	Fungi{superkingdom}(97);unidentified{phylum}(97);unidentified{class}(97);unidentified{order}(97);unidentified{family}(97);unidentified{genus}(97);unidentified{species}(97)	Fungi	unidentified	unidentified	unidentified	unidentified	unidentified	unidentified
ASV130	0	0	0	0	0	0	0	0	6	0	0	0	0	0	0	6	Fungi{superkingdom}(100);Basidiomycota{phylum}(100);Agaricomycetes{class}(100);Agaricales{order}(100);Omphalotaceae{family}(100);Marasmiellus{genus}(100);Marasmiellus_mesosporus{species}(100)	Fungi	Basidiomycota	Agaricomycetes	Agaricales	Omphalotaceae	Marasmiellus	Marasmiellus_mesosporus
ASV131	116	1644	500	672	502	11	202	983	12	46	73	597	1293	130	30	6811	Fungi{superkingdom}(100);Ascomycota{phylum}(100);Sordariomycetes{class}(100);Hypocreales{order}(100);Ophiocordycipitaceae{family}(100);unidentified{genus}(100);unidentified{species}(100)	Fungi	Ascomycota	Sordariomycetes	Hypocreales	Ophiocordycipitaceae	unidentified	unidentified
ASV134	0	0	0	8	0	0	0	0	0	144	0	0	112	0	0	264	Fungi{superkingdom}(100);Unassigned{phylum}(0);Unassigned{class}(0);Unassigned{order}(0);Unassigned{family}(0);Unassigned{genus}(0);Unassigned{species}(0)	Fungi	Unassigned	Unassigned	Unassigned	Unassigned	Unassigned	Unassigned
ASV135	0	0	0	0	0	0	0	0	0	0	0	53	0	71	0	124	Fungi{superkingdom}(97);Ascomycota{phylum}(97);Sordariomycetes{class}(97);Hypocreales{order}(97);Unassigned{family}(0);Unassigned{genus}(0);Unassigned{species}(0)	Fungi	Ascomycota	Sordariomycetes	Hypocreales	Unassigned	Unassigned	Unassigned
ASV136	13	0	0	0	0	3	0	0	22	94	0	0	1814	0	0	1946	Fungi{superkingdom}(85);Basidiomycota{phylum}(85);Agaricomycetes{class}(85);unidentified{order}(85);unidentified{family}(85);unidentified{genus}(85);unidentified{species}(85)	Fungi	Basidiomycota	Agaricomycetes	unidentified	unidentified	unidentified	unidentified
ASV137	0	0	0	0	0	6311	0	326	0	0	0	0	0	0	0	6637	Fungi{superkingdom}(100);Unassigned{phylum}(0);Unassigned{class}(0);Unassigned{order}(0);Unassigned{family}(0);Unassigned{genus}(0);Unassigned{species}(0)	Fungi	Unassigned	Unassigned	Unassigned	Unassigned	Unassigned	Unassigned
ASV138	0	302	0	0	6	0	0	0	0	45	0	0	61	97	0	511	Fungi{superkingdom}(64);Ascomycota{phylum}(64);Eurotiomycetes{class}(64);Chaetothyriales{order}(64);unidentified{family}(64);unidentified{genus}(64);unidentified{species}(64)	Fungi	Ascomycota	Eurotiomycetes	Chaetothyriales	unidentified	unidentified	unidentified
ASV139	0	0	0	0	160	0	0	0	0	0	0	0	0	0	0	160	Fungi{superkingdom}(99);Ascomycota{phylum}(99);Pezizomycetes{class}(99);Pezizales{order}(99);Ascobolaceae{family}(99);unidentified{genus}(99);unidentified{species}(99)	Fungi	Ascomycota	Pezizomycetes	Pezizales	Ascobolaceae	unidentified	unidentified
ASV140	0	0	433	41	0	0	0	0	0	0	0	0	0	0	0	474	Fungi{superkingdom}(100);Ascomycota{phylum}(100);Sordariomycetes{class}(100);Branch06{order}(100);unidentified{family}(100);unidentified{genus}(100);unidentified{species}(100)	Fungi	Ascomycota	Sordariomycetes	Branch06	unidentified	unidentified	unidentified
ASV141	0	6	0	0	0	0	0	0	0	0	0	0	0	0	0	6	Fungi{superkingdom}(100);Basidiomycota{phylum}(100);Agaricomycetes{class}(100);Agaricales{order}(100);Agaricaceae{family}(100);Tulostoma{genus}(100);Tulostoma_fimbriatum{species}(100)	Fungi	Basidiomycota	Agaricomycetes	Agaricales	Agaricaceae	Tulostoma	Tulostoma_fimbriatum
ASV142	0	66	0	506	16	34	25	0	13	0	0	0	0	0	15	675	Fungi{superkingdom}(100);Ascomycota{phylum}(100);Dothideomycetes{class}(100);Pleosporales{order}(100);Didymosphaeriaceae{family}(100);Kalmusia{genus}(100);unidentified{species}(100)	Fungi	Ascomycota	Dothideomycetes	Pleosporales	Didymosphaeriaceae	Kalmusia	unidentified
ASV144	0	0	0	0	0	56	0	291	2722	390	0	180	337	5	0	3981	Fungi{superkingdom}(66);Ascomycota{phylum}(66);Dothideomycetes{class}(66);Pleosporales{order}(66);Cucurbitariaceae{family}(66);Pyrenochaetopsis{genus}(66);Pyrenochaetopsis_leptospora{species}(66)	Fungi	Ascomycota	Dothideomycetes	Pleosporales	Cucurbitariaceae	Pyrenochaetopsis	Pyrenochaetopsis_leptospora
ASV145	0	96	0	7	11	0	11	18	0	27	0	0	0	0	0	170	Fungi{superkingdom}(100);Ascomycota{phylum}(100);Sordariomycetes{class}(100);Sordariales{order}(100);Chaetomiaceae{family}(100);Acrophialophora{genus}(100);unidentified{species}(100)	Fungi	Ascomycota	Sordariomycetes	Sordariales	Chaetomiaceae	Acrophialophora	unidentified
ASV146	0	293	0	0	0	0	0	0	0	0	0	0	0	0	0	293	Fungi{superkingdom}(63);Ascomycota{phylum}(63);Eurotiomycetes{class}(63);Chaetothyriales{order}(63);unidentified{family}(63);unidentified{genus}(63);unidentified{species}(63)	Fungi	Ascomycota	Eurotiomycetes	Chaetothyriales	unidentified	unidentified	unidentified
ASV147	0	0	0	5	0	0	0	0	0	0	0	0	0	0	0	5	Fungi{superkingdom}(100);Ascomycota{phylum}(100);Pezizomycetes{class}(100);Pezizales{order}(100);Pezizaceae{family}(100);Mattirolomyces{genus}(100);Mattirolomyces_spinosus{species}(100)	Fungi	Ascomycota	Pezizomycetes	Pezizales	Pezizaceae	Mattirolomyces	Mattirolomyces_spinosus
ASV148	57	21	0	0	0	57	70	208	155	0	21	81	128	24	34	856	Fungi{superkingdom}(98);Ascomycota{phylum}(98);Dothideomycetes{class}(98);Pleosporales{order}(98);Didymellaceae{family}(98);Didymella{genus}(98);Didymella_urticicola{species}(98)	Fungi	Ascomycota	Dothideomycetes	Pleosporales	Didymellaceae	Didymella	Didymella_urticicola
ASV149	0	0	0	0	0	17	0	0	0	0	16	0	0	0	0	33	Fungi{superkingdom}(61);unidentified{phylum}(61);unidentified{class}(61);unidentified{order}(61);unidentified{family}(61);unidentified{genus}(61);unidentified{species}(61)	Fungi	unidentified	unidentified	unidentified	unidentified	unidentified	unidentified
ASV150	73	0	58	78	187	0	0	0	0	0	0	81	0	7	0	484	Fungi{superkingdom}(100);Ascomycota{phylum}(100);Dothideomycetes{class}(100);Pleosporales{order}(100);Phaeosphaeriaceae{family}(100);Paraphoma{genus}(100);Paraphoma_chrysanthemicola{species}(100)	Fungi	Ascomycota	Dothideomycetes	Pleosporales	Phaeosphaeriaceae	Paraphoma	Paraphoma_chrysanthemicola
ASV151	45	0	41	6	0	0	60	135	183	30	71	153	245	30	0	999	Fungi{superkingdom}(98);Basidiomycota{phylum}(98);Tremellomycetes{class}(98);Filobasidiales{order}(98);Filobasidiaceae{family}(98);Filobasidium{genus}(98);Filobasidium_chernovii{species}(98)	Fungi	Basidiomycota	Tremellomycetes	Filobasidiales	Filobasidiaceae	Filobasidium	Filobasidium_chernovii
ASV152	0	0	0	65	5118	0	0	0	0	0	0	0	0	0	0	5183	Fungi{superkingdom}(84);Ascomycota{phylum}(84);Sordariomycetes{class}(84);Hypocreales{order}(84);Bionectriaceae{family}(84);Clonostachys{genus}(84);Clonostachys_rosea{species}(84)	Fungi	Ascomycota	Sordariomycetes	Hypocreales	Bionectriaceae	Clonostachys	Clonostachys_rosea
ASV155	0	0	0	0	0	0	0	0	0	0	0	0	0	0	34	34	Fungi{superkingdom}(90);Ascomycota{phylum}(90);Dothideomycetes{class}(90);Pleosporales{order}(90);Pleosporales_fam_Incertae_sedis{family}(90);Thyrostroma{genus}(90);Thyrostroma_cornicola{species}(90)	Fungi	Ascomycota	Dothideomycetes	Pleosporales	Pleosporales_fam_Incertae_sedis	Thyrostroma	Thyrostroma_cornicola
ASV157	0	0	0	0	11	0	0	0	0	0	0	0	0	0	0	11	Fungi{superkingdom}(86);Ascomycota{phylum}(86);Pezizomycetes{class}(86);Pezizales{order}(86);Pezizaceae{family}(86);Iodophanus{genus}(86);unidentified{species}(86)	Fungi	Ascomycota	Pezizomycetes	Pezizales	Pezizaceae	Iodophanus	unidentified
ASV158	0	0	0	0	6	0	0	0	0	0	0	0	0	0	0	6	Fungi{superkingdom}(94);Basidiomycota{phylum}(94);Agaricomycetes{class}(94);Agaricales{order}(94);Agaricaceae{family}(94);Tulostoma{genus}(94);Tulostoma_kotlabae{species}(94)	Fungi	Basidiomycota	Agaricomycetes	Agaricales	Agaricaceae	Tulostoma	Tulostoma_kotlabae
ASV160	17	205	0	0	14	16	0	65	50	0	21	74	0	32	8	502	Fungi{superkingdom}(61);Basidiomycota{phylum}(61);Tremellomycetes{class}(61);Filobasidiales{order}(61);Filobasidiaceae{family}(61);Filobasidium{genus}(61);Filobasidium_chernovii{species}(61)	Fungi	Basidiomycota	Tremellomycetes	Filobasidiales	Filobasidiaceae	Filobasidium	Filobasidium_chernovii
ASV161	23	0	0	7	16	0	0	0	83	22	0	0	36	0	0	187	Fungi{superkingdom}(84);Ascomycota{phylum}(84);Dothideomycetes{class}(84);Pleosporales{order}(84);Phaeosphaeriaceae{family}(84);Wojnowiciella{genus}(84);Wojnowiciella_dactylidis{species}(84)	Fungi	Ascomycota	Dothideomycetes	Pleosporales	Phaeosphaeriaceae	Wojnowiciella	Wojnowiciella_dactylidis
ASV162	0	0	0	0	0	0	0	0	245	0	0	0	0	71	0	316	Fungi{superkingdom}(100);Ascomycota{phylum}(100);Dothideomycetes{class}(100);Pleosporales{order}(100);Phaeosphaeriaceae{family}(100);Chaetosphaeronema{genus}(100);unidentified{species}(100)	Fungi	Ascomycota	Dothideomycetes	Pleosporales	Phaeosphaeriaceae	Chaetosphaeronema	unidentified
ASV163	0	0	0	15	0	0	143	0	133	34	0	0	432	0	56	813	Fungi{superkingdom}(100);Unassigned{phylum}(0);Unassigned{class}(0);Unassigned{order}(0);Unassigned{family}(0);Unassigned{genus}(0);Unassigned{species}(0)	Fungi	Unassigned	Unassigned	Unassigned	Unassigned	Unassigned	Unassigned
ASV164	0	0	0	0	0	29	0	0	292	0	25	0	0	0	0	346	Fungi{superkingdom}(100);Ascomycota{phylum}(100);Dothideomycetes{class}(100);Pleosporales{order}(100);Sporormiaceae{family}(100);Preussia{genus}(100);Preussia_terricola{species}(100)	Fungi	Ascomycota	Dothideomycetes	Pleosporales	Sporormiaceae	Preussia	Preussia_terricola
ASV166	0	0	0	0	5	0	0	0	0	0	0	0	0	0	0	5	Fungi{superkingdom}(100);Ascomycota{phylum}(100);Pezizomycetes{class}(100);Pezizales{order}(100);Pezizales_fam_Incertae_sedis{family}(100);Trichobolus{genus}(100);Trichobolus_zukalii{species}(100)	Fungi	Ascomycota	Pezizomycetes	Pezizales	Pezizales_fam_Incertae_sedis	Trichobolus	Trichobolus_zukalii
ASV167	38	121	32	6	17	116	0	0	158	60	0	0	132	22	111	813	Fungi{superkingdom}(67);Ascomycota{phylum}(67);Dothideomycetes{class}(67);Pleosporales{order}(67);Didymellaceae{family}(67);Calophoma{genus}(67);Calophoma_rosae{species}(67)	Fungi	Ascomycota	Dothideomycetes	Pleosporales	Didymellaceae	Calophoma	Calophoma_rosae
ASV169	0	41	0	0	0	141	97	108	276	65	0	0	293	0	140	1161	Fungi{superkingdom}(83);unidentified{phylum}(83);unidentified{class}(83);unidentified{order}(83);unidentified{family}(83);unidentified{genus}(83);unidentified{species}(83)	Fungi	unidentified	unidentified	unidentified	unidentified	unidentified	unidentified
ASV170	0	0	0	0	0	0	0	0	0	0	0	0	0	29	0	29	Fungi{superkingdom}(73);Basidiomycota{phylum}(73);Tremellomycetes{class}(73);Tremellales{order}(73);Rhynchogastremataceae{family}(73);Papiliotrema{genus}(73);Papiliotrema_laurentii{species}(73)	Fungi	Basidiomycota	Tremellomycetes	Tremellales	Rhynchogastremataceae	Papiliotrema	Papiliotrema_laurentii
ASV171	0	113	0	0	0	0	0	31	0	0	0	0	0	0	0	144	Fungi{superkingdom}(100);Chytridiomycota{phylum}(100);Spizellomycetes{class}(100);Spizellomycetales{order}(100);Powellomycetaceae{family}(100);Powellomyces{genus}(100);unidentified{species}(100)	Fungi	Chytridiomycota	Spizellomycetes	Spizellomycetales	Powellomycetaceae	Powellomyces	unidentified
ASV172	0	0	0	0	0	0	0	0	0	141	0	0	0	29	0	170	Fungi{superkingdom}(100);Ascomycota{phylum}(100);Sordariomycetes{class}(100);Hypocreales{order}(100);Cordycipitaceae{family}(100);Beauveria{genus}(100);Beauveria_amorpha{species}(100)	Fungi	Ascomycota	Sordariomycetes	Hypocreales	Cordycipitaceae	Beauveria	Beauveria_amorpha
ASV173	0	0	0	0	1463	853	34	0	26	0	0	0	3688	100	226	6390	Fungi{superkingdom}(79);Ascomycota{phylum}(79);Sordariomycetes{class}(79);Hypocreales{order}(79);Nectriaceae{family}(79);Fusarium{genus}(79);Unassigned{species}(0)	Fungi	Ascomycota	Sordariomycetes	Hypocreales	Nectriaceae	Fusarium	Unassigned
ASV174	0	30	19	0	0	0	57	105	0	0	0	104	0	39	233	587	Fungi{superkingdom}(87);Basidiomycota{phylum}(87);Tremellomycetes{class}(87);Filobasidiales{order}(87);Filobasidiaceae{family}(87);Naganishia{genus}(87);Naganishia_adeliensis{species}(87)	Fungi	Basidiomycota	Tremellomycetes	Filobasidiales	Filobasidiaceae	Naganishia	Naganishia_adeliensis
ASV176	0	0	0	0	0	0	0	0	104	0	0	0	0	0	18	122	Fungi{superkingdom}(96);Ascomycota{phylum}(96);Dothideomycetes{class}(96);Pleosporales{order}(96);Pleosporaceae{family}(96);Bipolaris{genus}(96);Bipolaris_microlaenae{species}(96)	Fungi	Ascomycota	Dothideomycetes	Pleosporales	Pleosporaceae	Bipolaris	Bipolaris_microlaenae
ASV177	0	257	0	42	0	0	0	0	0	503	0	0	0	0	0	802	Fungi{superkingdom}(60);unidentified{phylum}(60);unidentified{class}(60);unidentified{order}(60);unidentified{family}(60);unidentified{genus}(60);unidentified{species}(60)	Fungi	unidentified	unidentified	unidentified	unidentified	unidentified	unidentified
ASV178	0	0	6	0	62	42	0	56	17	7	0	425	91	15	0	721	Fungi{superkingdom}(72);Ascomycota{phylum}(72);Sordariomycetes{class}(72);Hypocreales{order}(72);unidentified{family}(72);unidentified{genus}(72);unidentified{species}(72)	Fungi	Ascomycota	Sordariomycetes	Hypocreales	unidentified	unidentified	unidentified
ASV181	43	55	0	71	30	0	54	0	0	0	0	0	0	0	0	253	Fungi{superkingdom}(100);Ascomycota{phylum}(100);Dothideomycetes{class}(100);Pleosporales{order}(100);Unassigned{family}(0);Unassigned{genus}(0);Unassigned{species}(0)	Fungi	Ascomycota	Dothideomycetes	Pleosporales	Unassigned	Unassigned	Unassigned
ASV182	0	0	0	0	0	0	9	0	0	0	0	0	0	0	0	9	Fungi{superkingdom}(89);Ascomycota{phylum}(89);Sordariomycetes{class}(89);Hypocreales{order}(89);Cordycipitaceae{family}(89);Cordyceps{genus}(89);Cordyceps_bassiana{species}(89)	Fungi	Ascomycota	Sordariomycetes	Hypocreales	Cordycipitaceae	Cordyceps	Cordyceps_bassiana
ASV184	0	0	0	0	10	0	0	0	0	0	0	0	0	0	0	10	Fungi{superkingdom}(96);Ascomycota{phylum}(96);Sordariomycetes{class}(96);Sordariales{order}(96);Chaetomiaceae{family}(96);unidentified{genus}(96);unidentified{species}(96)	Fungi	Ascomycota	Sordariomycetes	Sordariales	Chaetomiaceae	unidentified	unidentified
ASV185	0	0	0	0	0	0	0	0	0	6	0	101	0	0	0	107	Fungi{superkingdom}(65);unidentified{phylum}(65);unidentified{class}(65);unidentified{order}(65);unidentified{family}(65);unidentified{genus}(65);unidentified{species}(65)	Fungi	unidentified	unidentified	unidentified	unidentified	unidentified	unidentified
ASV186	298	0	0	484	84	0	561	223	274	0	0	0	0	6	0	1930	Fungi{superkingdom}(75);Ascomycota{phylum}(75);Eurotiomycetes{class}(75);Eurotiales{order}(75);Aspergillaceae{family}(75);Penicillium{genus}(75);Penicillium_griseofulvum{species}(75)	Fungi	Ascomycota	Eurotiomycetes	Eurotiales	Aspergillaceae	Penicillium	Penicillium_griseofulvum
ASV188	179	0	0	74	114	0	0	0	190	0	0	0	0	0	0	557	Fungi{superkingdom}(100);Ascomycota{phylum}(100);Dothideomycetes{class}(100);Pleosporales{order}(100);Phaeosphaeriaceae{family}(100);Paraphoma{genus}(100);Paraphoma_chrysanthemicola{species}(100)	Fungi	Ascomycota	Dothideomycetes	Pleosporales	Phaeosphaeriaceae	Paraphoma	Paraphoma_chrysanthemicola
ASV191	0	0	0	0	27	0	0	0	0	0	0	0	0	0	0	27	Fungi{superkingdom}(88);Basidiomycota{phylum}(88);Agaricomycetes{class}(88);Agaricales{order}(88);Bolbitiaceae{family}(88);Panaeolus{genus}(88);Panaeolus_semiovatus{species}(88)	Fungi	Basidiomycota	Agaricomycetes	Agaricales	Bolbitiaceae	Panaeolus	Panaeolus_semiovatus
ASV192	0	0	18	0	0	0	0	0	0	0	24	0	0	0	0	42	Fungi{superkingdom}(100);Unassigned{phylum}(0);Unassigned{class}(0);Unassigned{order}(0);Unassigned{family}(0);Unassigned{genus}(0);Unassigned{species}(0)	Fungi	Unassigned	Unassigned	Unassigned	Unassigned	Unassigned	Unassigned
ASV193	0	0	0	0	31	0	0	0	0	0	0	0	0	0	0	31	Fungi{superkingdom}(100);Basidiomycota{phylum}(100);Agaricomycetes{class}(100);Phallales{order}(100);Phallaceae{family}(100);Lysurus{genus}(100);unidentified{species}(100)	Fungi	Basidiomycota	Agaricomycetes	Phallales	Phallaceae	Lysurus	unidentified
ASV194	0	41	0	0	0	0	0	0	0	0	17	0	46	0	0	104	Fungi{superkingdom}(76);Basidiomycota{phylum}(76);Agaricomycetes{class}(76);unidentified{order}(76);unidentified{family}(76);unidentified{genus}(76);unidentified{species}(76)	Fungi	Basidiomycota	Agaricomycetes	unidentified	unidentified	unidentified	unidentified
ASV195	0	0	0	0	0	0	0	0	50	0	0	0	54	0	0	104	Fungi{superkingdom}(83);Ascomycota{phylum}(83);Dothideomycetes{class}(83);Pleosporales{order}(83);Camarosporidiellaceae{family}(83);Camarosporidiella{genus}(83);Camarosporidiella_mackenziei{species}(83)	Fungi	Ascomycota	Dothideomycetes	Pleosporales	Camarosporidiellaceae	Camarosporidiella	Camarosporidiella_mackenziei
ASV198	0	0	0	0	6	0	0	25	0	8	20	0	41	0	0	100	Fungi{superkingdom}(62);unidentified{phylum}(62);unidentified{class}(62);unidentified{order}(62);unidentified{family}(62);unidentified{genus}(62);unidentified{species}(62)	Fungi	unidentified	unidentified	unidentified	unidentified	unidentified	unidentified
ASV199	0	0	0	0	0	0	0	0	0	105	0	0	0	54	0	159	Fungi{superkingdom}(97);unidentified{phylum}(97);unidentified{class}(97);unidentified{order}(97);unidentified{family}(97);unidentified{genus}(97);unidentified{species}(97)	Fungi	unidentified	unidentified	unidentified	unidentified	unidentified	unidentified
ASV200	0	0	0	0	10	0	0	0	0	0	0	0	0	0	0	10	Fungi{superkingdom}(100);Basidiomycota{phylum}(100);Agaricomycetes{class}(100);Agaricales{order}(100);Bolbitiaceae{family}(100);Conocybe{genus}(100);Conocybe_deliquescens{species}(100)	Fungi	Basidiomycota	Agaricomycetes	Agaricales	Bolbitiaceae	Conocybe	Conocybe_deliquescens
ASV201	0	0	0	0	0	0	0	0	0	2	0	0	0	0	0	2	Fungi{superkingdom}(100);Chytridiomycota{phylum}(100);Rhizophlyctidomycetes{class}(100);Rhizophlyctidales{order}(100);Rhizophlyctidaceae{family}(100);Rhizophlyctis{genus}(100);unidentified{species}(100)	Fungi	Chytridiomycota	Rhizophlyctidomycetes	Rhizophlyctidales	Rhizophlyctidaceae	Rhizophlyctis	unidentified
ASV203	0	0	0	0	0	0	0	1688	0	0	0	0	0	0	0	1688	Fungi{superkingdom}(78);Ascomycota{phylum}(78);Unassigned{class}(0);Unassigned{order}(0);Unassigned{family}(0);Unassigned{genus}(0);Unassigned{species}(0)	Fungi	Ascomycota	Unassigned	Unassigned	Unassigned	Unassigned	Unassigned
ASV204	0	0	0	0	38	0	0	0	0	1420	5	642	322	0	8	2435	Fungi{superkingdom}(100);Unassigned{phylum}(0);Unassigned{class}(0);Unassigned{order}(0);Unassigned{family}(0);Unassigned{genus}(0);Unassigned{species}(0)	Fungi	Unassigned	Unassigned	Unassigned	Unassigned	Unassigned	Unassigned
ASV205	47	1465	379	354	307	0	0	0	0	0	0	0	317	0	0	2869	Fungi{superkingdom}(83);unidentified{phylum}(83);unidentified{class}(83);unidentified{order}(83);unidentified{family}(83);unidentified{genus}(83);unidentified{species}(83)	Fungi	unidentified	unidentified	unidentified	unidentified	unidentified	unidentified
ASV206	0	558	252	25	618	0	0	95	56	54	0	62	0	0	0	1720	Fungi{superkingdom}(65);Ascomycota{phylum}(65);Leotiomycetes{class}(65);Helotiales{order}(65);unidentified{family}(65);unidentified{genus}(65);unidentified{species}(65)	Fungi	Ascomycota	Leotiomycetes	Helotiales	unidentified	unidentified	unidentified
ASV207	0	94	21	0	9	45	0	111	122	47	0	146	162	0	203	960	Fungi{superkingdom}(64);unidentified{phylum}(64);unidentified{class}(64);unidentified{order}(64);unidentified{family}(64);unidentified{genus}(64);unidentified{species}(64)	Fungi	unidentified	unidentified	unidentified	unidentified	unidentified	unidentified
ASV208	30	0	0	0	0	0	0	0	0	0	0	0	0	0	2	32	Fungi{superkingdom}(94);Ascomycota{phylum}(94);Dothideomycetes{class}(94);Pleosporales{order}(94);Sporormiaceae{family}(94);Sparticola{genus}(94);Sparticola_forlicesenae{species}(94)	Fungi	Ascomycota	Dothideomycetes	Pleosporales	Sporormiaceae	Sparticola	Sparticola_forlicesenae
ASV209	0	551	0	3	21	0	0	0	0	0	0	0	0	0	0	575	Fungi{superkingdom}(63);unidentified{phylum}(63);unidentified{class}(63);unidentified{order}(63);unidentified{family}(63);unidentified{genus}(63);unidentified{species}(63)	Fungi	unidentified	unidentified	unidentified	unidentified	unidentified	unidentified
ASV211	0	157	44	0	18	0	0	0	187	0	0	0	41	64	17	528	Fungi{superkingdom}(98);Ascomycota{phylum}(98);Dothideomycetes{class}(98);Pleosporales{order}(98);Pleosporaceae{family}(98);Alternaria{genus}(98);Alternaria_subcucurbitae{species}(98)	Fungi	Ascomycota	Dothideomycetes	Pleosporales	Pleosporaceae	Alternaria	Alternaria_subcucurbitae
ASV214	0	235	0	0	0	0	0	0	0	0	0	85	0	0	0	320	Fungi{superkingdom}(99);Mortierellomycota{phylum}(99);Mortierellomycetes{class}(99);Mortierellales{order}(99);Mortierellaceae{family}(99);Mortierella{genus}(99);Mortierella_alpina{species}(99)	Fungi	Mortierellomycota	Mortierellomycetes	Mortierellales	Mortierellaceae	Mortierella	Mortierella_alpina
ASV215	0	0	0	0	0	0	0	33	7638	0	0	0	0	0	0	7671	Fungi{superkingdom}(100);Ascomycota{phylum}(100);Eurotiomycetes{class}(100);Onygenales{order}(100);Onygenales_fam_Incertae_sedis{family}(100);Chrysosporium{genus}(100);Chrysosporium_lobatum{species}(100)	Fungi	Ascomycota	Eurotiomycetes	Onygenales	Onygenales_fam_Incertae_sedis	Chrysosporium	Chrysosporium_lobatum
ASV217	85	0	0	0	18	0	0	38	0	0	0	0	0	0	0	141	Fungi{superkingdom}(78);Ascomycota{phylum}(78);Dothideomycetes{class}(78);Unassigned{order}(0);Unassigned{family}(0);Unassigned{genus}(0);Unassigned{species}(0)	Fungi	Ascomycota	Dothideomycetes	Unassigned	Unassigned	Unassigned	Unassigned
ASV218	0	30	0	24	0	0	0	0	32	38	0	0	0	0	0	124	Fungi{superkingdom}(94);Ascomycota{phylum}(94);Dothideomycetes{class}(94);Pleosporales{order}(94);Dictyosporiaceae{family}(94);Pseudocoleophoma{genus}(94);Pseudocoleophoma_polygonicola{species}(94)	Fungi	Ascomycota	Dothideomycetes	Pleosporales	Dictyosporiaceae	Pseudocoleophoma	Pseudocoleophoma_polygonicola
ASV222	0	0	0	0	0	0	0	0	0	85	0	0	0	0	0	85	Fungi{superkingdom}(94);Ascomycota{phylum}(94);Sordariomycetes{class}(94);Sordariales{order}(94);Chaetomiaceae{family}(94);Unassigned{genus}(0);Unassigned{species}(0)	Fungi	Ascomycota	Sordariomycetes	Sordariales	Chaetomiaceae	Unassigned	Unassigned
ASV223	0	0	0	5	3	0	8	0	0	0	0	0	0	0	0	16	Fungi{superkingdom}(100);Ascomycota{phylum}(100);Sordariomycetes{class}(100);Togniniales{order}(100);Togniniaceae{family}(100);Phaeoacremonium{genus}(100);Phaeoacremonium_rubrigenum{species}(100)	Fungi	Ascomycota	Sordariomycetes	Togniniales	Togniniaceae	Phaeoacremonium	Phaeoacremonium_rubrigenum
ASV227	9	0	0	1907	4	0	0	40	27	0	0	0	42	0	19	2048	Fungi{superkingdom}(100);Basidiomycota{phylum}(100);Agaricomycetes{class}(100);Agaricales{order}(100);Strophariaceae{family}(100);Tubaria{genus}(100);Tubaria_minima{species}(100)	Fungi	Basidiomycota	Agaricomycetes	Agaricales	Strophariaceae	Tubaria	Tubaria_minima
ASV228	0	0	0	0	6	0	0	0	0	0	0	0	0	0	17	23	Fungi{superkingdom}(100);Ascomycota{phylum}(100);Sordariomycetes{class}(100);Sordariales{order}(100);Chaetomiaceae{family}(100);Chaetomium{genus}(100);Chaetomium_angulare{species}(100)	Fungi	Ascomycota	Sordariomycetes	Sordariales	Chaetomiaceae	Chaetomium	Chaetomium_angulare
ASV230	0	215	46	30	6	0	0	0	0	65	0	0	0	0	0	362	Fungi{superkingdom}(100);Ascomycota{phylum}(100);Dothideomycetes{class}(100);Pleosporales{order}(100);Dictyosporiaceae{family}(100);Dictyosporium{genus}(100);Dictyosporium_heptasporum{species}(100)	Fungi	Ascomycota	Dothideomycetes	Pleosporales	Dictyosporiaceae	Dictyosporium	Dictyosporium_heptasporum
ASV231	0	0	0	46	0	0	0	0	0	0	0	0	0	0	0	46	Fungi{superkingdom}(87);Ascomycota{phylum}(87);Dothideomycetes{class}(87);Pleosporales{order}(87);Unassigned{family}(0);Unassigned{genus}(0);Unassigned{species}(0)	Fungi	Ascomycota	Dothideomycetes	Pleosporales	Unassigned	Unassigned	Unassigned
ASV233	0	37	0	8	0	0	78	0	0	51	0	137	77	46	118	552	Fungi{superkingdom}(100);Unassigned{phylum}(0);Unassigned{class}(0);Unassigned{order}(0);Unassigned{family}(0);Unassigned{genus}(0);Unassigned{species}(0)	Fungi	Unassigned	Unassigned	Unassigned	Unassigned	Unassigned	Unassigned
ASV235	99	0	0	0	0	0	0	0	0	0	0	0	20	0	0	119	Fungi{superkingdom}(61);Ascomycota{phylum}(61);Dothideomycetes{class}(61);Pleosporales{order}(61);Phaeosphaeriaceae{family}(61);Parastagonospora{genus}(61);Parastagonospora_nodorum{species}(61)	Fungi	Ascomycota	Dothideomycetes	Pleosporales	Phaeosphaeriaceae	Parastagonospora	Parastagonospora_nodorum
ASV236	0	0	0	0	0	0	0	0	39	0	0	0	368	0	0	407	Fungi{superkingdom}(67);unidentified{phylum}(67);unidentified{class}(67);unidentified{order}(67);unidentified{family}(67);unidentified{genus}(67);unidentified{species}(67)	Fungi	unidentified	unidentified	unidentified	unidentified	unidentified	unidentified
ASV237	0	0	137	72	0	0	0	0	0	0	0	0	0	0	0	209	Fungi{superkingdom}(99);Ascomycota{phylum}(99);Sordariomycetes{class}(99);Sordariales{order}(99);Chaetomiaceae{family}(99);Zopfiella{genus}(99);unidentified{species}(99)	Fungi	Ascomycota	Sordariomycetes	Sordariales	Chaetomiaceae	Zopfiella	unidentified
ASV239	0	0	0	0	0	0	0	0	0	13	0	0	0	0	0	13	Fungi{superkingdom}(100);Ascomycota{phylum}(100);Dothideomycetes{class}(100);Pleosporales{order}(100);Didymosphaeriaceae{family}(100);Kalmusia{genus}(100);unidentified{species}(100)	Fungi	Ascomycota	Dothideomycetes	Pleosporales	Didymosphaeriaceae	Kalmusia	unidentified
ASV240	7	0	0	0	0	0	0	0	0	0	0	0	0	0	0	7	Fungi{superkingdom}(98);Basidiomycota{phylum}(98);Agaricomycetes{class}(98);Cantharellales{order}(98);Ceratobasidiaceae{family}(98);Thanatephorus{genus}(98);Thanatephorus_cucumeris{species}(98)	Fungi	Basidiomycota	Agaricomycetes	Cantharellales	Ceratobasidiaceae	Thanatephorus	Thanatephorus_cucumeris
ASV242	0	0	0	0	0	0	0	44	0	0	0	0	0	0	0	44	Fungi{superkingdom}(97);Ascomycota{phylum}(97);Dothideomycetes{class}(97);Pleosporales{order}(97);Didymellaceae{family}(97);Unassigned{genus}(0);Unassigned{species}(0)	Fungi	Ascomycota	Dothideomycetes	Pleosporales	Didymellaceae	Unassigned	Unassigned
ASV243	5	0	0	0	0	0	0	0	0	0	0	0	0	0	0	5	Fungi{superkingdom}(77);Basidiomycota{phylum}(77);Agaricomycetes{class}(77);Agaricales{order}(77);Entolomataceae{family}(77);Clitopilus{genus}(77);unidentified{species}(77)	Fungi	Basidiomycota	Agaricomycetes	Agaricales	Entolomataceae	Clitopilus	unidentified
ASV244	8	0	0	42	0	0	0	41	0	0	0	0	0	0	24	115	Fungi{superkingdom}(100);Ascomycota{phylum}(100);Dothideomycetes{class}(100);Dothideomycetes_ord_Incertae_sedis{order}(100);Eremomycetaceae{family}(100);Rhexothecium{genus}(100);unidentified{species}(100)	Fungi	Ascomycota	Dothideomycetes	Dothideomycetes_ord_Incertae_sedis	Eremomycetaceae	Rhexothecium	unidentified
ASV245	0	52	0	0	0	36	0	0	52	0	0	0	0	0	0	140	Fungi{superkingdom}(100);Unassigned{phylum}(0);Unassigned{class}(0);Unassigned{order}(0);Unassigned{family}(0);Unassigned{genus}(0);Unassigned{species}(0)	Fungi	Unassigned	Unassigned	Unassigned	Unassigned	Unassigned	Unassigned
ASV248	0	0	0	0	0	88	0	51	0	0	0	0	0	0	0	139	Fungi{superkingdom}(100);Ascomycota{phylum}(100);Dothideomycetes{class}(100);Pleosporales{order}(100);Didymellaceae{family}(100);Unassigned{genus}(0);Unassigned{species}(0)	Fungi	Ascomycota	Dothideomycetes	Pleosporales	Didymellaceae	Unassigned	Unassigned
ASV249	26	0	92	11	0	9	44	0	67	32	0	112	90	0	129	612	Fungi{superkingdom}(99);Ascomycota{phylum}(99);Pezizomycetes{class}(99);Pezizales{order}(99);Pezizaceae{family}(99);unidentified{genus}(99);unidentified{species}(99)	Fungi	Ascomycota	Pezizomycetes	Pezizales	Pezizaceae	unidentified	unidentified
ASV250	0	177	71	0	0	69	21	68	94	60	64	0	0	0	71	695	Fungi{superkingdom}(99);Ascomycota{phylum}(99);Pezizomycetes{class}(99);Pezizales{order}(99);Pezizaceae{family}(99);unidentified{genus}(99);unidentified{species}(99)	Fungi	Ascomycota	Pezizomycetes	Pezizales	Pezizaceae	unidentified	unidentified
ASV251	0	0	0	0	0	0	1063	29	0	0	0	0	0	0	0	1092	Fungi{superkingdom}(66);unidentified{phylum}(66);unidentified{class}(66);unidentified{order}(66);unidentified{family}(66);unidentified{genus}(66);unidentified{species}(66)	Fungi	unidentified	unidentified	unidentified	unidentified	unidentified	unidentified
ASV252	0	0	0	0	0	0	0	10	0	0	0	0	0	0	0	10	Fungi{superkingdom}(60);Ascomycota{phylum}(60);Sordariomycetes{class}(60);Sordariales{order}(60);unidentified{family}(60);unidentified{genus}(60);unidentified{species}(60)	Fungi	Ascomycota	Sordariomycetes	Sordariales	unidentified	unidentified	unidentified
ASV253	0	93	0	0	0	25	0	58	0	0	25	135	176	0	12	524	Fungi{superkingdom}(99);Calcarisporiellomycota{phylum}(99);Calcarisporiellomycetes{class}(99);Calcarisporiellales{order}(99);Calcarisporiellaceae{family}(99);Calcarisporiella{genus}(99);unidentified{species}(99)	Fungi	Calcarisporiellomycota	Calcarisporiellomycetes	Calcarisporiellales	Calcarisporiellaceae	Calcarisporiella	unidentified
ASV254	0	0	0	0	0	0	0	0	46	15	0	0	0	0	0	61	Fungi{superkingdom}(100);Ascomycota{phylum}(100);Dothideomycetes{class}(100);Pleosporales{order}(100);Lentitheciaceae{family}(100);Keissleriella{genus}(100);Unassigned{species}(0)	Fungi	Ascomycota	Dothideomycetes	Pleosporales	Lentitheciaceae	Keissleriella	Unassigned
ASV255	390	0	0	0	0	0	0	0	0	0	0	0	0	0	0	390	Fungi{superkingdom}(77);Basidiomycota{phylum}(77);Agaricomycetes{class}(77);Agaricales{order}(77);Omphalotaceae{family}(77);Marasmiellus{genus}(77);Marasmiellus_paspali{species}(77)	Fungi	Basidiomycota	Agaricomycetes	Agaricales	Omphalotaceae	Marasmiellus	Marasmiellus_paspali
ASV256	0	0	0	0	0	0	0	179	0	0	0	0	184	46	0	409	Fungi{superkingdom}(100);Ascomycota{phylum}(100);Sordariomycetes{class}(100);Hypocreales{order}(100);Stachybotryaceae{family}(100);Stachybotrys{genus}(100);Stachybotrys_microspora{species}(100)	Fungi	Ascomycota	Sordariomycetes	Hypocreales	Stachybotryaceae	Stachybotrys	Stachybotrys_microspora
ASV258	0	0	0	0	13	0	0	0	0	0	0	0	0	0	0	13	Fungi{superkingdom}(97);Ascomycota{phylum}(97);Leotiomycetes{class}(97);Helotiales{order}(97);Helotiaceae{family}(97);Articulospora{genus}(97);unidentified{species}(97)	Fungi	Ascomycota	Leotiomycetes	Helotiales	Helotiaceae	Articulospora	unidentified
ASV259	12	0	0	0	0	0	0	0	0	0	0	0	0	0	0	12	Fungi{superkingdom}(83);Ascomycota{phylum}(83);Sordariomycetes{class}(83);Hypocreales{order}(83);Bionectriaceae{family}(83);Clonostachys{genus}(83);Clonostachys_rosea{species}(83)	Fungi	Ascomycota	Sordariomycetes	Hypocreales	Bionectriaceae	Clonostachys	Clonostachys_rosea
ASV261	0	0	0	0	9	11	13	613	0	359	0	0	0	0	0	1005	Fungi{superkingdom}(100);Unassigned{phylum}(0);Unassigned{class}(0);Unassigned{order}(0);Unassigned{family}(0);Unassigned{genus}(0);Unassigned{species}(0)	Fungi	Unassigned	Unassigned	Unassigned	Unassigned	Unassigned	Unassigned
ASV263	0	984	0	0	38	0	0	73	78	28	28	0	106	16	44	1395	Fungi{superkingdom}(100);Ascomycota{phylum}(100);Sordariomycetes{class}(100);Sordariales{order}(100);Chaetomiaceae{family}(100);Unassigned{genus}(0);Unassigned{species}(0)	Fungi	Ascomycota	Sordariomycetes	Sordariales	Chaetomiaceae	Unassigned	Unassigned
ASV264	2169	0	0	0	0	0	0	0	0	0	0	0	0	0	0	2169	Fungi{superkingdom}(78);unidentified{phylum}(78);unidentified{class}(78);unidentified{order}(78);unidentified{family}(78);unidentified{genus}(78);unidentified{species}(78)	Fungi	unidentified	unidentified	unidentified	unidentified	unidentified	unidentified
ASV265	0	0	0	0	0	0	0	0	0	6000	0	0	1774	0	0	7774	Fungi{superkingdom}(87);Basidiomycota{phylum}(87);Agaricomycetes{class}(87);Agaricales{order}(87);Tricholomataceae{family}(87);Melanoleuca{genus}(87);Melanoleuca_communis{species}(87)	Fungi	Basidiomycota	Agaricomycetes	Agaricales	Tricholomataceae	Melanoleuca	Melanoleuca_communis
ASV266	103	0	0	0	0	0	56	21	0	0	55	0	0	0	0	235	Fungi{superkingdom}(80);Ascomycota{phylum}(80);Dothideomycetes{class}(80);Pleosporales{order}(80);Phaeosphaeriaceae{family}(80);Paraphoma{genus}(80);Paraphoma_chrysanthemicola{species}(80)	Fungi	Ascomycota	Dothideomycetes	Pleosporales	Phaeosphaeriaceae	Paraphoma	Paraphoma_chrysanthemicola
ASV267	0	0	0	0	0	0	0	0	39	0	0	0	0	0	0	39	Fungi{superkingdom}(94);Ascomycota{phylum}(94);Sordariomycetes{class}(94);Xylariales{order}(94);Diatrypaceae{family}(94);Monosporascus{genus}(94);unidentified{species}(94)	Fungi	Ascomycota	Sordariomycetes	Xylariales	Diatrypaceae	Monosporascus	unidentified
ASV268	0	18	0	0	0	0	0	0	0	0	0	0	0	0	25	43	Fungi{superkingdom}(100);Unassigned{phylum}(0);Unassigned{class}(0);Unassigned{order}(0);Unassigned{family}(0);Unassigned{genus}(0);Unassigned{species}(0)	Fungi	Unassigned	Unassigned	Unassigned	Unassigned	Unassigned	Unassigned
ASV274	0	0	0	0	0	0	368	6550	0	0	0	0	35	0	0	6953	Fungi{superkingdom}(82);Ascomycota{phylum}(82);Sordariomycetes{class}(82);Hypocreales{order}(82);Nectriaceae{family}(82);Fusarium{genus}(82);Fusarium_solani{species}(82)	Fungi	Ascomycota	Sordariomycetes	Hypocreales	Nectriaceae	Fusarium	Fusarium_solani
ASV275	0	0	0	0	23	0	0	0	0	0	0	0	0	0	0	23	Fungi{superkingdom}(90);Ascomycota{phylum}(90);Sordariomycetes{class}(90);Hypocreales{order}(90);Hypocreales_fam_Incertae_sedis{family}(90);Acremonium{genus}(90);Acremonium_dichromosporum{species}(90)	Fungi	Ascomycota	Sordariomycetes	Hypocreales	Hypocreales_fam_Incertae_sedis	Acremonium	Acremonium_dichromosporum
ASV276	0	0	104	0	24	0	19	0	0	0	27	0	44	0	0	218	Fungi{superkingdom}(75);Basidiomycota{phylum}(75);Tremellomycetes{class}(75);Filobasidiales{order}(75);Filobasidiaceae{family}(75);Filobasidium{genus}(75);Filobasidium_oeirense{species}(75)	Fungi	Basidiomycota	Tremellomycetes	Filobasidiales	Filobasidiaceae	Filobasidium	Filobasidium_oeirense
ASV277	0	0	0	0	0	0	0	0	0	0	20	28	0	0	0	48	Fungi{superkingdom}(100);Unassigned{phylum}(0);Unassigned{class}(0);Unassigned{order}(0);Unassigned{family}(0);Unassigned{genus}(0);Unassigned{species}(0)	Fungi	Unassigned	Unassigned	Unassigned	Unassigned	Unassigned	Unassigned
ASV278	0	16	0	0	0	0	0	0	0	0	0	0	0	0	0	16	Fungi{superkingdom}(99);Ascomycota{phylum}(99);Eurotiomycetes{class}(99);Eurotiales{order}(99);Aspergillaceae{family}(99);Aspergillus{genus}(99);Aspergillus_pseudodeflectus{species}(99)	Fungi	Ascomycota	Eurotiomycetes	Eurotiales	Aspergillaceae	Aspergillus	Aspergillus_pseudodeflectus
ASV279	0	0	0	0	0	89	0	107	0	0	93	0	63	0	0	352	Fungi{superkingdom}(85);unidentified{phylum}(85);unidentified{class}(85);unidentified{order}(85);unidentified{family}(85);unidentified{genus}(85);unidentified{species}(85)	Fungi	unidentified	unidentified	unidentified	unidentified	unidentified	unidentified
ASV280	0	0	0	0	0	0	0	25	0	0	0	0	0	0	0	25	Fungi{superkingdom}(96);Ascomycota{phylum}(96);Eurotiomycetes{class}(96);Chaetothyriales{order}(96);Trichomeriaceae{family}(96);Knufia{genus}(96);Knufia_tsunedae{species}(96)	Fungi	Ascomycota	Eurotiomycetes	Chaetothyriales	Trichomeriaceae	Knufia	Knufia_tsunedae
ASV281	0	86	72	5	0	0	11	14	84	0	23	118	0	10	0	423	Fungi{superkingdom}(62);Calcarisporiellomycota{phylum}(62);Calcarisporiellomycetes{class}(62);Calcarisporiellales{order}(62);Calcarisporiellaceae{family}(62);Calcarisporiella{genus}(62);unidentified{species}(62)	Fungi	Calcarisporiellomycota	Calcarisporiellomycetes	Calcarisporiellales	Calcarisporiellaceae	Calcarisporiella	unidentified
ASV282	0	0	16	0	0	26	0	64	0	0	0	88	0	22	37	253	Fungi{superkingdom}(91);Ascomycota{phylum}(91);Leotiomycetes{class}(91);Helotiales{order}(91);Helotiaceae{family}(91);Tetracladium{genus}(91);Tetracladium_furcatum{species}(91)	Fungi	Ascomycota	Leotiomycetes	Helotiales	Helotiaceae	Tetracladium	Tetracladium_furcatum
ASV283	0	0	0	7	0	0	0	0	0	0	0	0	1824	0	0	1831	Fungi{superkingdom}(100);Unassigned{phylum}(0);Unassigned{class}(0);Unassigned{order}(0);Unassigned{family}(0);Unassigned{genus}(0);Unassigned{species}(0)	Fungi	Unassigned	Unassigned	Unassigned	Unassigned	Unassigned	Unassigned
ASV284	0	0	0	0	0	0	0	0	6933	0	0	0	0	0	0	6933	Fungi{superkingdom}(100);Ascomycota{phylum}(100);Eurotiomycetes{class}(100);Onygenales{order}(100);Onygenales_fam_Incertae_sedis{family}(100);Chrysosporium{genus}(100);Chrysosporium_lobatum{species}(100)	Fungi	Ascomycota	Eurotiomycetes	Onygenales	Onygenales_fam_Incertae_sedis	Chrysosporium	Chrysosporium_lobatum
ASV285	5	0	0	0	0	0	0	0	0	0	0	72	0	0	38	115	Fungi{superkingdom}(100);Unassigned{phylum}(0);Unassigned{class}(0);Unassigned{order}(0);Unassigned{family}(0);Unassigned{genus}(0);Unassigned{species}(0)	Fungi	Unassigned	Unassigned	Unassigned	Unassigned	Unassigned	Unassigned
ASV288	0	0	0	0	0	28	0	0	0	0	0	0	0	0	0	28	Fungi{superkingdom}(67);Ascomycota{phylum}(67);Dothideomycetes{class}(67);Pleosporales{order}(67);Didymellaceae{family}(67);Epicoccum{genus}(67);Epicoccum_nigrum{species}(67)	Fungi	Ascomycota	Dothideomycetes	Pleosporales	Didymellaceae	Epicoccum	Epicoccum_nigrum
ASV290	0	105	22	0	0	24	0	0	0	18	0	0	0	0	15	184	Fungi{superkingdom}(79);Ascomycota{phylum}(79);Dothideomycetes{class}(79);Pleosporales{order}(79);Didymosphaeriaceae{family}(79);Laburnicola{genus}(79);Unassigned{species}(0)	Fungi	Ascomycota	Dothideomycetes	Pleosporales	Didymosphaeriaceae	Laburnicola	Unassigned
ASV291	0	0	0	0	0	0	0	0	0	0	0	0	0	613	0	613	Fungi{superkingdom}(63);Basidiomycota{phylum}(63);Agaricomycetes{class}(63);Unassigned{order}(0);Unassigned{family}(0);Unassigned{genus}(0);Unassigned{species}(0)	Fungi	Basidiomycota	Agaricomycetes	Unassigned	Unassigned	Unassigned	Unassigned
ASV292	10	0	29	0	0	29	11	0	45	22	0	89	0	9	0	244	Fungi{superkingdom}(89);Ascomycota{phylum}(89);Leotiomycetes{class}(89);Helotiales{order}(89);unidentified{family}(89);unidentified{genus}(89);unidentified{species}(89)	Fungi	Ascomycota	Leotiomycetes	Helotiales	unidentified	unidentified	unidentified
ASV296	0	0	0	0	0	0	0	0	0	19	0	0	0	0	0	19	Fungi{superkingdom}(66);unidentified{phylum}(66);unidentified{class}(66);unidentified{order}(66);unidentified{family}(66);unidentified{genus}(66);unidentified{species}(66)	Fungi	unidentified	unidentified	unidentified	unidentified	unidentified	unidentified
ASV299	0	0	0	273	0	0	0	0	0	403	0	224	0	108	0	1008	Fungi{superkingdom}(90);Ascomycota{phylum}(90);Sordariomycetes{class}(90);Hypocreales{order}(90);Nectriaceae{family}(90);Fusarium{genus}(90);Fusarium_kyushuense{species}(90)	Fungi	Ascomycota	Sordariomycetes	Hypocreales	Nectriaceae	Fusarium	Fusarium_kyushuense
ASV300	0	0	638	0	48	0	0	0	0	0	0	0	0	0	0	686	Fungi{superkingdom}(100);Unassigned{phylum}(0);Unassigned{class}(0);Unassigned{order}(0);Unassigned{family}(0);Unassigned{genus}(0);Unassigned{species}(0)	Fungi	Unassigned	Unassigned	Unassigned	Unassigned	Unassigned	Unassigned
ASV301	0	204	0	0	0	0	14	0	0	0	0	0	0	0	0	218	Fungi{superkingdom}(97);Ascomycota{phylum}(97);Sordariomycetes{class}(97);Phomatosporales{order}(97);Phomatosporaceae{family}(97);Phomatospora{genus}(97);Phomatospora_biseriata{species}(97)	Fungi	Ascomycota	Sordariomycetes	Phomatosporales	Phomatosporaceae	Phomatospora	Phomatospora_biseriata
ASV302	83	541	0	0	0	0	0	0	940	0	0	0	0	0	0	1564	Fungi{superkingdom}(98);Mortierellomycota{phylum}(98);Mortierellomycetes{class}(98);Mortierellales{order}(98);Mortierellaceae{family}(98);Mortierella{genus}(98);Mortierella_alpina{species}(98)	Fungi	Mortierellomycota	Mortierellomycetes	Mortierellales	Mortierellaceae	Mortierella	Mortierella_alpina
ASV304	297	0	0	0	0	20	0	0	0	0	0	0	0	0	0	317	Fungi{superkingdom}(61);Basidiomycota{phylum}(61);Agaricomycetes{class}(61);Agaricales{order}(61);Agaricaceae{family}(61);Agaricus{genus}(61);unidentified{species}(61)	Fungi	Basidiomycota	Agaricomycetes	Agaricales	Agaricaceae	Agaricus	unidentified
ASV305	44	441	4	32	0	34	94	0	0	21	0	97	40	27	81	915	Fungi{superkingdom}(65);unidentified{phylum}(65);unidentified{class}(65);unidentified{order}(65);unidentified{family}(65);unidentified{genus}(65);unidentified{species}(65)	Fungi	unidentified	unidentified	unidentified	unidentified	unidentified	unidentified
ASV306	0	0	0	0	0	0	0	0	4397	0	0	0	0	0	0	4397	Fungi{superkingdom}(100);Unassigned{phylum}(0);Unassigned{class}(0);Unassigned{order}(0);Unassigned{family}(0);Unassigned{genus}(0);Unassigned{species}(0)	Fungi	Unassigned	Unassigned	Unassigned	Unassigned	Unassigned	Unassigned
ASV309	0	0	78	0	0	0	0	0	0	0	0	0	0	0	0	78	Fungi{superkingdom}(99);Basidiomycota{phylum}(99);Agaricomycetes{class}(99);Unassigned{order}(0);Unassigned{family}(0);Unassigned{genus}(0);Unassigned{species}(0)	Fungi	Basidiomycota	Agaricomycetes	Unassigned	Unassigned	Unassigned	Unassigned
ASV310	0	0	0	0	0	0	0	0	0	46	0	0	0	0	0	46	Fungi{superkingdom}(97);Ascomycota{phylum}(97);Dothideomycetes{class}(97);Pleosporales{order}(97);Lophiostomataceae{family}(97);Unassigned{genus}(0);Unassigned{species}(0)	Fungi	Ascomycota	Dothideomycetes	Pleosporales	Lophiostomataceae	Unassigned	Unassigned
ASV313	0	0	0	18	19	0	0	0	0	0	0	0	0	0	0	37	Fungi{superkingdom}(100);Ascomycota{phylum}(100);Sordariomycetes{class}(100);Sordariales{order}(100);Chaetomiaceae{family}(100);Chaetomium{genus}(100);Chaetomium_elatum{species}(100)	Fungi	Ascomycota	Sordariomycetes	Sordariales	Chaetomiaceae	Chaetomium	Chaetomium_elatum
ASV314	0	0	0	0	0	0	0	0	38	0	0	0	0	7	0	45	Fungi{superkingdom}(97);Mortierellomycota{phylum}(97);Mortierellomycetes{class}(97);Mortierellales{order}(97);Mortierellaceae{family}(97);Mortierella{genus}(97);Mortierella_alpina{species}(97)	Fungi	Mortierellomycota	Mortierellomycetes	Mortierellales	Mortierellaceae	Mortierella	Mortierella_alpina
ASV315	0	45	0	0	0	0	0	0	0	0	0	0	83	0	72	200	Fungi{superkingdom}(75);Basidiomycota{phylum}(75);Agaricomycetes{class}(75);Agaricales{order}(75);Agaricaceae{family}(75);Coprinus{genus}(75);Coprinus_phaeopunctatus{species}(75)	Fungi	Basidiomycota	Agaricomycetes	Agaricales	Agaricaceae	Coprinus	Coprinus_phaeopunctatus
ASV316	0	0	0	20	11	0	0	0	0	12	0	0	0	0	0	43	Fungi{superkingdom}(95);Basidiomycota{phylum}(95);Tremellomycetes{class}(95);Tremellales{order}(95);Bulleribasidiaceae{family}(95);Dioszegia{genus}(95);Dioszegia_takashimae{species}(95)	Fungi	Basidiomycota	Tremellomycetes	Tremellales	Bulleribasidiaceae	Dioszegia	Dioszegia_takashimae
ASV319	0	0	0	0	22	0	0	0	0	0	0	0	0	0	0	22	Fungi{superkingdom}(100);Unassigned{phylum}(0);Unassigned{class}(0);Unassigned{order}(0);Unassigned{family}(0);Unassigned{genus}(0);Unassigned{species}(0)	Fungi	Unassigned	Unassigned	Unassigned	Unassigned	Unassigned	Unassigned
ASV320	0	0	0	0	21	0	0	0	0	0	0	0	0	0	0	21	Fungi{superkingdom}(76);Ascomycota{phylum}(76);Sordariomycetes{class}(76);Hypocreales{order}(76);Nectriaceae{family}(76);Fusarium{genus}(76);Fusarium_concolor{species}(76)	Fungi	Ascomycota	Sordariomycetes	Hypocreales	Nectriaceae	Fusarium	Fusarium_concolor
ASV321	0	0	0	0	2	0	0	0	0	0	0	0	0	0	0	2	Fungi{superkingdom}(67);Basidiomycota{phylum}(67);Agaricomycetes{class}(67);Unassigned{order}(0);Unassigned{family}(0);Unassigned{genus}(0);Unassigned{species}(0)	Fungi	Basidiomycota	Agaricomycetes	Unassigned	Unassigned	Unassigned	Unassigned
ASV322	0	0	0	33	0	0	0	166	0	0	0	0	0	0	0	199	Fungi{superkingdom}(82);Ascomycota{phylum}(82);Eurotiomycetes{class}(82);Eurotiales{order}(82);Aspergillaceae{family}(82);Aspergillus{genus}(82);Aspergillus_felis{species}(82)	Fungi	Ascomycota	Eurotiomycetes	Eurotiales	Aspergillaceae	Aspergillus	Aspergillus_felis
ASV323	0	0	19	0	0	0	0	49	0	0	31	0	0	0	0	99	Fungi{superkingdom}(65);Ascomycota{phylum}(65);Dothideomycetes{class}(65);Pleosporales{order}(65);Didymellaceae{family}(65);Nothophoma{genus}(65);Nothophoma_variabilis{species}(65)	Fungi	Ascomycota	Dothideomycetes	Pleosporales	Didymellaceae	Nothophoma	Nothophoma_variabilis
ASV325	24	0	0	0	0	0	12	0	0	0	0	0	0	0	0	36	Fungi{superkingdom}(99);Ascomycota{phylum}(99);Dothideomycetes{class}(99);Pleosporales{order}(99);Lophiostomataceae{family}(99);Unassigned{genus}(0);Unassigned{species}(0)	Fungi	Ascomycota	Dothideomycetes	Pleosporales	Lophiostomataceae	Unassigned	Unassigned
ASV326	0	0	0	0	0	8	0	0	0	125	0	0	0	0	0	133	Fungi{superkingdom}(100);Ascomycota{phylum}(100);Sordariomycetes{class}(100);Hypocreales{order}(100);Cordycipitaceae{family}(100);Lecanicillium{genus}(100);Lecanicillium_dimorphum{species}(100)	Fungi	Ascomycota	Sordariomycetes	Hypocreales	Cordycipitaceae	Lecanicillium	Lecanicillium_dimorphum
ASV327	0	109	0	0	0	0	0	0	54	0	39	79	0	22	102	405	Fungi{superkingdom}(99);unidentified{phylum}(99);unidentified{class}(99);unidentified{order}(99);unidentified{family}(99);unidentified{genus}(99);unidentified{species}(99)	Fungi	unidentified	unidentified	unidentified	unidentified	unidentified	unidentified
ASV334	0	47	38	0	0	36	0	55	32	0	0	0	0	29	0	237	Fungi{superkingdom}(77);unidentified{phylum}(77);unidentified{class}(77);unidentified{order}(77);unidentified{family}(77);unidentified{genus}(77);unidentified{species}(77)	Fungi	unidentified	unidentified	unidentified	unidentified	unidentified	unidentified
ASV336	0	0	0	0	6	0	0	0	0	0	0	0	0	0	0	6	Fungi{superkingdom}(65);Basidiomycota{phylum}(65);Agaricomycetes{class}(65);Unassigned{order}(0);Unassigned{family}(0);Unassigned{genus}(0);Unassigned{species}(0)	Fungi	Basidiomycota	Agaricomycetes	Unassigned	Unassigned	Unassigned	Unassigned
ASV337	0	22	0	8	0	0	17	38	54	0	9	39	79	33	0	299	Fungi{superkingdom}(100);Ascomycota{phylum}(100);Dothideomycetes{class}(100);Pleosporales{order}(100);Unassigned{family}(0);Unassigned{genus}(0);Unassigned{species}(0)	Fungi	Ascomycota	Dothideomycetes	Pleosporales	Unassigned	Unassigned	Unassigned
ASV338	0	0	0	0	0	0	0	0	0	0	0	0	139	0	0	139	Fungi{superkingdom}(100);Unassigned{phylum}(0);Unassigned{class}(0);Unassigned{order}(0);Unassigned{family}(0);Unassigned{genus}(0);Unassigned{species}(0)	Fungi	Unassigned	Unassigned	Unassigned	Unassigned	Unassigned	Unassigned
ASV339	0	0	24	8	628	0	0	0	0	0	0	0	0	0	0	660	Fungi{superkingdom}(75);Ascomycota{phylum}(75);Sordariomycetes{class}(75);Hypocreales{order}(75);Cordycipitaceae{family}(75);Beauveria{genus}(75);Beauveria_varroae{species}(75)	Fungi	Ascomycota	Sordariomycetes	Hypocreales	Cordycipitaceae	Beauveria	Beauveria_varroae
ASV340	0	67	0	0	0	0	0	0	0	0	0	0	0	0	0	67	Fungi{superkingdom}(100);Ascomycota{phylum}(100);Sordariomycetes{class}(100);Sordariales{order}(100);Chaetomiaceae{family}(100);Humicola{genus}(100);Unassigned{species}(0)	Fungi	Ascomycota	Sordariomycetes	Sordariales	Chaetomiaceae	Humicola	Unassigned
ASV342	0	0	0	6	0	0	0	0	0	0	0	0	0	0	0	6	Fungi{superkingdom}(100);Basidiomycota{phylum}(100);Agaricomycetes{class}(100);Agaricales{order}(100);Bolbitiaceae{family}(100);Conocybe{genus}(100);Conocybe_deliquescens{species}(100)	Fungi	Basidiomycota	Agaricomycetes	Agaricales	Bolbitiaceae	Conocybe	Conocybe_deliquescens
ASV344	5	64	48	6	0	46	10	14	46	0	54	0	41	0	66	400	Fungi{superkingdom}(100);Mortierellomycota{phylum}(100);Mortierellomycetes{class}(100);Mortierellales{order}(100);Mortierellaceae{family}(100);Mortierella{genus}(100);Mortierella_polygonia{species}(100)	Fungi	Mortierellomycota	Mortierellomycetes	Mortierellales	Mortierellaceae	Mortierella	Mortierella_polygonia
ASV345	0	111	0	0	0	0	0	0	0	0	0	0	0	0	0	111	Fungi{superkingdom}(87);Ascomycota{phylum}(87);Dothideomycetes{class}(87);Pleosporales{order}(87);Pleosporales_fam_Incertae_sedis{family}(87);Thyrostroma{genus}(87);Thyrostroma_cornicola{species}(87)	Fungi	Ascomycota	Dothideomycetes	Pleosporales	Pleosporales_fam_Incertae_sedis	Thyrostroma	Thyrostroma_cornicola
ASV348	64	0	22	9	20	0	4	0	16	0	0	0	33	0	0	168	Fungi{superkingdom}(100);Unassigned{phylum}(0);Unassigned{class}(0);Unassigned{order}(0);Unassigned{family}(0);Unassigned{genus}(0);Unassigned{species}(0)	Fungi	Unassigned	Unassigned	Unassigned	Unassigned	Unassigned	Unassigned
ASV349	0	0	0	25	0	0	0	0	0	0	0	0	0	0	0	25	Fungi{superkingdom}(89);Ascomycota{phylum}(89);Dothideomycetes{class}(89);Pleosporales{order}(89);Pleosporaceae{family}(89);Bipolaris{genus}(89);Bipolaris_maydis{species}(89)	Fungi	Ascomycota	Dothideomycetes	Pleosporales	Pleosporaceae	Bipolaris	Bipolaris_maydis
ASV350	32	186	76	0	10	28	0	0	25	0	0	78	98	23	0	556	Fungi{superkingdom}(92);Basidiomycota{phylum}(92);Agaricomycetes{class}(92);Agaricales{order}(92);unidentified{family}(92);unidentified{genus}(92);unidentified{species}(92)	Fungi	Basidiomycota	Agaricomycetes	Agaricales	unidentified	unidentified	unidentified
ASV351	0	0	0	21	0	0	0	395	0	0	0	0	0	0	0	416	Fungi{superkingdom}(100);Ascomycota{phylum}(100);Sordariomycetes{class}(100);Hypocreales{order}(100);Stachybotryaceae{family}(100);Unassigned{genus}(0);Unassigned{species}(0)	Fungi	Ascomycota	Sordariomycetes	Hypocreales	Stachybotryaceae	Unassigned	Unassigned
ASV352	9	43	0	0	0	18	46	0	0	34	10	0	0	16	60	236	Fungi{superkingdom}(61);Basidiomycota{phylum}(61);Unassigned{class}(0);Unassigned{order}(0);Unassigned{family}(0);Unassigned{genus}(0);Unassigned{species}(0)	Fungi	Basidiomycota	Unassigned	Unassigned	Unassigned	Unassigned	Unassigned
ASV353	0	92	0	0	0	0	43	0	0	0	0	0	92	0	0	227	Fungi{superkingdom}(100);Ascomycota{phylum}(100);Pezizomycetes{class}(100);Pezizales{order}(100);Pezizaceae{family}(100);Kalaharituber{genus}(100);Kalaharituber_pfeilii{species}(100)	Fungi	Ascomycota	Pezizomycetes	Pezizales	Pezizaceae	Kalaharituber	Kalaharituber_pfeilii
ASV354	0	114	0	0	11	0	0	0	0	0	0	0	0	0	0	125	Fungi{superkingdom}(100);Unassigned{phylum}(0);Unassigned{class}(0);Unassigned{order}(0);Unassigned{family}(0);Unassigned{genus}(0);Unassigned{species}(0)	Fungi	Unassigned	Unassigned	Unassigned	Unassigned	Unassigned	Unassigned
ASV355	0	39	0	80	0	19	39	76	127	0	9	0	119	0	0	508	Fungi{superkingdom}(96);Ascomycota{phylum}(96);Sordariomycetes{class}(96);Sordariales{order}(96);Chaetomiaceae{family}(96);Botryotrichum{genus}(96);Botryotrichum_atrogriseum{species}(96)	Fungi	Ascomycota	Sordariomycetes	Sordariales	Chaetomiaceae	Botryotrichum	Botryotrichum_atrogriseum
ASV358	116	0	13	0	0	0	0	0	0	0	14	65	33	0	90	331	Fungi{superkingdom}(91);Ascomycota{phylum}(91);Sordariomycetes{class}(91);Sordariales{order}(91);Chaetomiaceae{family}(91);Chaetomium{genus}(91);Chaetomium_elatum{species}(91)	Fungi	Ascomycota	Sordariomycetes	Sordariales	Chaetomiaceae	Chaetomium	Chaetomium_elatum
ASV360	0	27	0	12	0	0	0	0	0	0	0	0	0	0	0	39	Fungi{superkingdom}(69);Ascomycota{phylum}(69);Leotiomycetes{class}(69);Helotiales{order}(69);Helotiaceae{family}(69);Articulospora{genus}(69);Unassigned{species}(0)	Fungi	Ascomycota	Leotiomycetes	Helotiales	Helotiaceae	Articulospora	Unassigned
ASV361	7	0	0	0	0	0	0	0	0	0	0	0	0	0	44	51	Fungi{superkingdom}(70);Ascomycota{phylum}(70);Dothideomycetes{class}(70);Pleosporales{order}(70);Sporormiaceae{family}(70);Unassigned{genus}(0);Unassigned{species}(0)	Fungi	Ascomycota	Dothideomycetes	Pleosporales	Sporormiaceae	Unassigned	Unassigned
ASV362	0	0	0	0	0	0	0	0	40	0	0	0	0	0	0	40	Fungi{superkingdom}(77);Basidiomycota{phylum}(77);Agaricomycetes{class}(77);unidentified{order}(77);unidentified{family}(77);unidentified{genus}(77);unidentified{species}(77)	Fungi	Basidiomycota	Agaricomycetes	unidentified	unidentified	unidentified	unidentified
ASV365	0	0	0	0	0	0	0	0	0	0	0	26	0	61	0	87	Fungi{superkingdom}(97);Ascomycota{phylum}(97);Dothideomycetes{class}(97);Pleosporales{order}(97);Pleosporaceae{family}(97);Alternaria{genus}(97);Alternaria_subcucurbitae{species}(97)	Fungi	Ascomycota	Dothideomycetes	Pleosporales	Pleosporaceae	Alternaria	Alternaria_subcucurbitae
ASV367	0	0	0	0	451	0	0	138	0	0	0	0	0	0	0	589	Fungi{superkingdom}(73);Ascomycota{phylum}(73);Sordariomycetes{class}(73);Sordariales{order}(73);unidentified{family}(73);unidentified{genus}(73);unidentified{species}(73)	Fungi	Ascomycota	Sordariomycetes	Sordariales	unidentified	unidentified	unidentified
ASV368	0	252	133	0	0	0	59	0	0	150	0	0	127	0	0	721	Fungi{superkingdom}(97);unidentified{phylum}(97);unidentified{class}(97);unidentified{order}(97);unidentified{family}(97);unidentified{genus}(97);unidentified{species}(97)	Fungi	unidentified	unidentified	unidentified	unidentified	unidentified	unidentified
ASV369	0	790	36	63	130	0	0	0	0	0	0	0	0	0	0	1019	Fungi{superkingdom}(97);Ascomycota{phylum}(97);Sordariomycetes{class}(97);Hypocreales{order}(97);Hypocreales_fam_Incertae_sedis{family}(97);Acremonium{genus}(97);Acremonium_spinosum{species}(97)	Fungi	Ascomycota	Sordariomycetes	Hypocreales	Hypocreales_fam_Incertae_sedis	Acremonium	Acremonium_spinosum
ASV370	0	0	27	0	0	0	0	0	32	0	0	0	0	0	0	59	Fungi{superkingdom}(100);Ascomycota{phylum}(100);Pezizomycetes{class}(100);Pezizales{order}(100);Pezizaceae{family}(100);Kalaharituber{genus}(100);Kalaharituber_pfeilii{species}(100)	Fungi	Ascomycota	Pezizomycetes	Pezizales	Pezizaceae	Kalaharituber	Kalaharituber_pfeilii
ASV371	0	0	0	0	0	0	0	0	0	0	0	0	158	0	35	193	Fungi{superkingdom}(100);Unassigned{phylum}(0);Unassigned{class}(0);Unassigned{order}(0);Unassigned{family}(0);Unassigned{genus}(0);Unassigned{species}(0)	Fungi	Unassigned	Unassigned	Unassigned	Unassigned	Unassigned	Unassigned
ASV372	0	0	0	0	0	0	0	0	264	0	0	0	104	0	0	368	Fungi{superkingdom}(97);Basidiomycota{phylum}(97);Agaricomycetes{class}(97);Cantharellales{order}(97);Ceratobasidiaceae{family}(97);Ceratobasidium{genus}(97);unidentified{species}(97)	Fungi	Basidiomycota	Agaricomycetes	Cantharellales	Ceratobasidiaceae	Ceratobasidium	unidentified
ASV376	0	0	5	6	28	0	0	0	0	0	0	0	0	0	0	39	Fungi{superkingdom}(100);Unassigned{phylum}(0);Unassigned{class}(0);Unassigned{order}(0);Unassigned{family}(0);Unassigned{genus}(0);Unassigned{species}(0)	Fungi	Unassigned	Unassigned	Unassigned	Unassigned	Unassigned	Unassigned
ASV380	0	0	24	8	0	0	0	0	52	0	0	0	0	0	0	84	Fungi{superkingdom}(96);Basidiomycota{phylum}(96);Agaricomycetes{class}(96);Cantharellales{order}(96);Ceratobasidiaceae{family}(96);Thanatephorus{genus}(96);Thanatephorus_cucumeris{species}(96)	Fungi	Basidiomycota	Agaricomycetes	Cantharellales	Ceratobasidiaceae	Thanatephorus	Thanatephorus_cucumeris
ASV381	11	0	0	10	0	0	13	0	0	0	0	0	0	0	53	87	Fungi{superkingdom}(100);Unassigned{phylum}(0);Unassigned{class}(0);Unassigned{order}(0);Unassigned{family}(0);Unassigned{genus}(0);Unassigned{species}(0)	Fungi	Unassigned	Unassigned	Unassigned	Unassigned	Unassigned	Unassigned
ASV382	0	0	0	0	3	0	0	0	0	0	0	0	0	0	0	3	Fungi{superkingdom}(99);Ascomycota{phylum}(99);Dothideomycetes{class}(99);Pleosporales{order}(99);Leptosphaeriaceae{family}(99);Sphaerellopsis{genus}(99);Sphaerellopsis_isthmospora{species}(99)	Fungi	Ascomycota	Dothideomycetes	Pleosporales	Leptosphaeriaceae	Sphaerellopsis	Sphaerellopsis_isthmospora
ASV386	0	0	0	0	0	29	0	0	0	21	0	0	0	0	0	50	Fungi{superkingdom}(100);Ascomycota{phylum}(100);Pezizomycetes{class}(100);Pezizales{order}(100);Ascobolaceae{family}(100);unidentified{genus}(100);unidentified{species}(100)	Fungi	Ascomycota	Pezizomycetes	Pezizales	Ascobolaceae	unidentified	unidentified
ASV389	0	0	0	0	0	0	0	47	0	0	0	0	0	0	0	47	Fungi{superkingdom}(83);unidentified{phylum}(83);unidentified{class}(83);unidentified{order}(83);unidentified{family}(83);unidentified{genus}(83);unidentified{species}(83)	Fungi	unidentified	unidentified	unidentified	unidentified	unidentified	unidentified
ASV392	0	0	27	0	15	0	0	0	0	0	0	11	0	0	0	53	Fungi{superkingdom}(99);Ascomycota{phylum}(99);Dothideomycetes{class}(99);Botryosphaeriales{order}(99);Botryosphaeriaceae{family}(99);Macrophoma{genus}(99);unidentified{species}(99)	Fungi	Ascomycota	Dothideomycetes	Botryosphaeriales	Botryosphaeriaceae	Macrophoma	unidentified
ASV393	39	0	0	0	0	0	0	0	0	0	0	0	0	28	0	67	Fungi{superkingdom}(65);Ascomycota{phylum}(65);Sordariomycetes{class}(65);unidentified{order}(65);unidentified{family}(65);unidentified{genus}(65);unidentified{species}(65)	Fungi	Ascomycota	Sordariomycetes	unidentified	unidentified	unidentified	unidentified
ASV394	0	0	0	0	3592	0	0	39	0	0	0	0	0	0	0	3631	Fungi{superkingdom}(100);Basidiomycota{phylum}(100);Agaricomycetes{class}(100);Agaricales{order}(100);Tricholomataceae{family}(100);Melanoleuca{genus}(100);Unassigned{species}(0)	Fungi	Basidiomycota	Agaricomycetes	Agaricales	Tricholomataceae	Melanoleuca	Unassigned
ASV395	0	0	0	0	0	0	0	0	0	9	0	0	0	0	0	9	Fungi{superkingdom}(100);Unassigned{phylum}(0);Unassigned{class}(0);Unassigned{order}(0);Unassigned{family}(0);Unassigned{genus}(0);Unassigned{species}(0)	Fungi	Unassigned	Unassigned	Unassigned	Unassigned	Unassigned	Unassigned
ASV397	0	0	0	29	0	0	0	0	0	0	0	0	0	0	0	29	Fungi{superkingdom}(86);Ascomycota{phylum}(86);Pezizomycetes{class}(86);Pezizales{order}(86);Pezizaceae{family}(86);Iodophanus{genus}(86);unidentified{species}(86)	Fungi	Ascomycota	Pezizomycetes	Pezizales	Pezizaceae	Iodophanus	unidentified
ASV398	0	0	0	0	0	0	0	0	0	0	0	40	0	0	0	40	Fungi{superkingdom}(79);Ascomycota{phylum}(79);Sordariomycetes{class}(79);Sordariales{order}(79);Chaetomiaceae{family}(79);Acrophialophora{genus}(79);Acrophialophora_hechuanensis{species}(79)	Fungi	Ascomycota	Sordariomycetes	Sordariales	Chaetomiaceae	Acrophialophora	Acrophialophora_hechuanensis
ASV399	36	73	12	0	0	101	0	75	101	11	0	29	0	15	0	453	Fungi{superkingdom}(96);Ascomycota{phylum}(96);Dothideomycetes{class}(96);Pleosporales{order}(96);Phaeosphaeriaceae{family}(96);Neostagonospora{genus}(96);unidentified{species}(96)	Fungi	Ascomycota	Dothideomycetes	Pleosporales	Phaeosphaeriaceae	Neostagonospora	unidentified
ASV403	0	79	76	0	0	0	0	0	0	0	25	52	0	0	61	293	Fungi{superkingdom}(80);Ascomycota{phylum}(80);Dothideomycetes{class}(80);Pleosporales{order}(80);Leptosphaeriaceae{family}(80);Leptosphaeria{genus}(80);Leptosphaeria_sclerotioides{species}(80)	Fungi	Ascomycota	Dothideomycetes	Pleosporales	Leptosphaeriaceae	Leptosphaeria	Leptosphaeria_sclerotioides
ASV404	0	52	0	0	0	0	0	0	0	0	0	0	0	0	0	52	Fungi{superkingdom}(93);Basidiomycota{phylum}(93);Agaricomycetes{class}(93);Agaricales{order}(93);Entolomataceae{family}(93);Entoloma{genus}(93);Entoloma_phaeocyathus{species}(93)	Fungi	Basidiomycota	Agaricomycetes	Agaricales	Entolomataceae	Entoloma	Entoloma_phaeocyathus
ASV405	0	0	0	0	0	0	11	0	0	0	0	31	0	18	0	60	Fungi{superkingdom}(100);Unassigned{phylum}(0);Unassigned{class}(0);Unassigned{order}(0);Unassigned{family}(0);Unassigned{genus}(0);Unassigned{species}(0)	Fungi	Unassigned	Unassigned	Unassigned	Unassigned	Unassigned	Unassigned
ASV406	0	13	0	0	0	931	0	1589	0	0	8	0	0	0	0	2541	Fungi{superkingdom}(82);unidentified{phylum}(82);unidentified{class}(82);unidentified{order}(82);unidentified{family}(82);unidentified{genus}(82);unidentified{species}(82)	Fungi	unidentified	unidentified	unidentified	unidentified	unidentified	unidentified
ASV407	0	0	0	0	0	0	0	33	0	0	45	67	0	25	0	170	Fungi{superkingdom}(99);Ascomycota{phylum}(99);Pezizomycetes{class}(99);Pezizales{order}(99);Pezizaceae{family}(99);Kalaharituber{genus}(99);Kalaharituber_pfeilii{species}(99)	Fungi	Ascomycota	Pezizomycetes	Pezizales	Pezizaceae	Kalaharituber	Kalaharituber_pfeilii
ASV408	16	0	0	0	0	0	0	35	0	0	0	16	0	0	0	67	Fungi{superkingdom}(83);Ascomycota{phylum}(83);Dothideomycetes{class}(83);Pleosporales{order}(83);Phaeosphaeriaceae{family}(83);Wojnowiciella{genus}(83);Wojnowiciella_leptocarpi{species}(83)	Fungi	Ascomycota	Dothideomycetes	Pleosporales	Phaeosphaeriaceae	Wojnowiciella	Wojnowiciella_leptocarpi
ASV410	60	0	0	0	5	0	0	0	39	0	0	0	0	0	0	104	Fungi{superkingdom}(91);Ascomycota{phylum}(91);Dothideomycetes{class}(91);Pleosporales{order}(91);Sporormiaceae{family}(91);Preussia{genus}(91);Preussia_flanaganii{species}(91)	Fungi	Ascomycota	Dothideomycetes	Pleosporales	Sporormiaceae	Preussia	Preussia_flanaganii
ASV411	0	0	0	9	0	0	0	0	0	7	14	0	34	0	209	273	Fungi{superkingdom}(77);Ascomycota{phylum}(77);Sordariomycetes{class}(77);Xylariales{order}(77);Diatrypaceae{family}(77);Monosporascus{genus}(77);Unassigned{species}(0)	Fungi	Ascomycota	Sordariomycetes	Xylariales	Diatrypaceae	Monosporascus	Unassigned
ASV412	0	121	84	0	0	39	61	0	0	0	0	31	0	26	76	438	Fungi{superkingdom}(70);Basidiomycota{phylum}(70);Agaricomycetes{class}(70);Cantharellales{order}(70);Ceratobasidiaceae{family}(70);Ceratobasidium{genus}(70);unidentified{species}(70)	Fungi	Basidiomycota	Agaricomycetes	Cantharellales	Ceratobasidiaceae	Ceratobasidium	unidentified
ASV417	0	75	0	0	0	0	0	0	45	0	0	36	0	0	0	156	Fungi{superkingdom}(97);Basidiomycota{phylum}(97);Tremellomycetes{class}(97);Filobasidiales{order}(97);Filobasidiaceae{family}(97);Naganishia{genus}(97);Naganishia_adeliensis{species}(97)	Fungi	Basidiomycota	Tremellomycetes	Filobasidiales	Filobasidiaceae	Naganishia	Naganishia_adeliensis
ASV418	0	0	64	0	0	56	0	0	15	0	0	0	0	25	62	222	Fungi{superkingdom}(100);Chytridiomycota{phylum}(100);GS13{class}(100);unidentified{order}(100);unidentified{family}(100);unidentified{genus}(100);unidentified{species}(100)	Fungi	Chytridiomycota	GS13	unidentified	unidentified	unidentified	unidentified
ASV419	7	0	0	0	0	0	0	0	0	0	0	0	0	0	0	7	Fungi{superkingdom}(100);Basidiomycota{phylum}(100);Agaricomycetes{class}(100);Agaricales{order}(100);Bolbitiaceae{family}(100);Agrocybe{genus}(100);Agrocybe_pediades{species}(100)	Fungi	Basidiomycota	Agaricomycetes	Agaricales	Bolbitiaceae	Agrocybe	Agrocybe_pediades
ASV423	61	0	25	0	0	0	0	0	0	0	0	0	0	0	0	86	Fungi{superkingdom}(60);Ascomycota{phylum}(60);Orbiliomycetes{class}(60);Orbiliales{order}(60);Orbiliaceae{family}(60);Orbilia{genus}(60);unidentified{species}(60)	Fungi	Ascomycota	Orbiliomycetes	Orbiliales	Orbiliaceae	Orbilia	unidentified
ASV425	0	0	0	0	0	0	0	49	0	0	0	0	0	0	0	49	Fungi{superkingdom}(66);Ascomycota{phylum}(66);Dothideomycetes{class}(66);Dothideales{order}(66);Aureobasidiaceae{family}(66);Unassigned{genus}(0);Unassigned{species}(0)	Fungi	Ascomycota	Dothideomycetes	Dothideales	Aureobasidiaceae	Unassigned	Unassigned
ASV426	0	0	0	48	0	62	0	274	0	0	0	0	0	0	0	384	Fungi{superkingdom}(72);Ascomycota{phylum}(72);Sordariomycetes{class}(72);Hypocreales{order}(72);Clavicipitaceae{family}(72);Metarhizium{genus}(72);Metarhizium_anisopliae{species}(72)	Fungi	Ascomycota	Sordariomycetes	Hypocreales	Clavicipitaceae	Metarhizium	Metarhizium_anisopliae
ASV427	0	0	22	0	0	0	0	0	0	0	0	0	0	0	0	22	Fungi{superkingdom}(100);Ascomycota{phylum}(100);Dothideomycetes{class}(100);Pleosporales{order}(100);Pleosporaceae{family}(100);Alternaria{genus}(100);Alternaria_chlamydosporigena{species}(100)	Fungi	Ascomycota	Dothideomycetes	Pleosporales	Pleosporaceae	Alternaria	Alternaria_chlamydosporigena
ASV429	30	0	0	0	0	0	36	0	0	27	37	62	73	0	46	311	Fungi{superkingdom}(93);Basidiomycota{phylum}(93);Agaricomycetes{class}(93);Agaricales{order}(93);Entolomataceae{family}(93);Entoloma{genus}(93);Entoloma_phaeocyathus{species}(93)	Fungi	Basidiomycota	Agaricomycetes	Agaricales	Entolomataceae	Entoloma	Entoloma_phaeocyathus
ASV432	0	97	0	0	0	45	0	42	0	0	0	0	0	0	0	184	Fungi{superkingdom}(93);Basidiomycota{phylum}(93);Agaricomycetes{class}(93);Agaricales{order}(93);Entolomataceae{family}(93);Entoloma{genus}(93);Entoloma_phaeocyathus{species}(93)	Fungi	Basidiomycota	Agaricomycetes	Agaricales	Entolomataceae	Entoloma	Entoloma_phaeocyathus
ASV433	0	0	0	0	0	32	85	0	0	0	0	0	0	0	0	117	Fungi{superkingdom}(65);Glomeromycota{phylum}(65);Glomeromycetes{class}(65);Glomerales{order}(65);Glomeraceae{family}(65);Septoglomus{genus}(65);unidentified{species}(65)	Fungi	Glomeromycota	Glomeromycetes	Glomerales	Glomeraceae	Septoglomus	unidentified
ASV434	48	0	0	0	10	0	35	57	0	0	0	0	122	12	0	284	Fungi{superkingdom}(100);Basidiomycota{phylum}(100);Agaricomycetes{class}(100);Agaricales{order}(100);Entolomataceae{family}(100);Entoloma{genus}(100);Entoloma_rusticoides{species}(100)	Fungi	Basidiomycota	Agaricomycetes	Agaricales	Entolomataceae	Entoloma	Entoloma_rusticoides
ASV435	0	0	0	0	0	0	0	0	0	21	0	0	0	18	0	39	Fungi{superkingdom}(99);Ascomycota{phylum}(99);Eurotiomycetes{class}(99);Eurotiales{order}(99);Aspergillaceae{family}(99);Aspergillus{genus}(99);Aspergillus_pseudodeflectus{species}(99)	Fungi	Ascomycota	Eurotiomycetes	Eurotiales	Aspergillaceae	Aspergillus	Aspergillus_pseudodeflectus
ASV436	7	40	20	21	6	0	0	0	0	26	0	0	0	0	0	120	Fungi{superkingdom}(94);Ascomycota{phylum}(94);Dothideomycetes{class}(94);Pleosporales{order}(94);Pleosporaceae{family}(94);Comoclathris{genus}(94);unidentified{species}(94)	Fungi	Ascomycota	Dothideomycetes	Pleosporales	Pleosporaceae	Comoclathris	unidentified
ASV437	0	0	37	0	0	0	0	18	0	0	0	37	58	0	0	150	Fungi{superkingdom}(67);unidentified{phylum}(67);unidentified{class}(67);unidentified{order}(67);unidentified{family}(67);unidentified{genus}(67);unidentified{species}(67)	Fungi	unidentified	unidentified	unidentified	unidentified	unidentified	unidentified
ASV438	0	0	0	0	0	0	0	0	0	0	0	0	0	4	14	18	Fungi{superkingdom}(100);Ascomycota{phylum}(100);Sordariomycetes{class}(100);Myrmecridiales{order}(100);Myrmecridiaceae{family}(100);Myrmecridium{genus}(100);Unassigned{species}(0)	Fungi	Ascomycota	Sordariomycetes	Myrmecridiales	Myrmecridiaceae	Myrmecridium	Unassigned
ASV443	0	0	0	0	8	0	0	0	0	0	0	0	0	0	0	8	Fungi{superkingdom}(72);unidentified{phylum}(72);unidentified{class}(72);unidentified{order}(72);unidentified{family}(72);unidentified{genus}(72);unidentified{species}(72)	Fungi	unidentified	unidentified	unidentified	unidentified	unidentified	unidentified
ASV452	0	0	0	0	0	21	0	0	0	0	0	43	0	94	0	158	Fungi{superkingdom}(67);Basidiomycota{phylum}(67);Tremellomycetes{class}(67);Filobasidiales{order}(67);Filobasidiaceae{family}(67);Naganishia{genus}(67);Naganishia_uzbekistanensis{species}(67)	Fungi	Basidiomycota	Tremellomycetes	Filobasidiales	Filobasidiaceae	Naganishia	Naganishia_uzbekistanensis
ASV454	4	32	18	10	0	0	5	0	0	0	37	56	0	0	55	217	Fungi{superkingdom}(61);Basidiomycota{phylum}(61);Agaricomycetes{class}(61);Unassigned{order}(0);Unassigned{family}(0);Unassigned{genus}(0);Unassigned{species}(0)	Fungi	Basidiomycota	Agaricomycetes	Unassigned	Unassigned	Unassigned	Unassigned
ASV455	0	0	0	0	6	12	27	0	98	0	32	0	83	0	0	258	Fungi{superkingdom}(67);Mortierellomycota{phylum}(67);Mortierellomycetes{class}(67);Mortierellales{order}(67);Unassigned{family}(0);Unassigned{genus}(0);Unassigned{species}(0)	Fungi	Mortierellomycota	Mortierellomycetes	Mortierellales	Unassigned	Unassigned	Unassigned
ASV456	0	0	0	12	0	14	0	0	0	0	0	0	0	0	0	26	Fungi{superkingdom}(100);Unassigned{phylum}(0);Unassigned{class}(0);Unassigned{order}(0);Unassigned{family}(0);Unassigned{genus}(0);Unassigned{species}(0)	Fungi	Unassigned	Unassigned	Unassigned	Unassigned	Unassigned	Unassigned
ASV460	35	0	0	37	0	0	0	0	0	0	0	0	0	0	0	72	Fungi{superkingdom}(84);unidentified{phylum}(84);unidentified{class}(84);unidentified{order}(84);unidentified{family}(84);unidentified{genus}(84);unidentified{species}(84)	Fungi	unidentified	unidentified	unidentified	unidentified	unidentified	unidentified
ASV461	0	13	25	0	0	0	0	0	46	0	0	0	0	0	25	109	Fungi{superkingdom}(100);Ascomycota{phylum}(100);Dothideomycetes{class}(100);Capnodiales{order}(100);Mycosphaerellaceae{family}(100);Mycosphaerella{genus}(100);Mycosphaerella_tassiana{species}(100)	Fungi	Ascomycota	Dothideomycetes	Capnodiales	Mycosphaerellaceae	Mycosphaerella	Mycosphaerella_tassiana
ASV462	0	0	0	0	0	0	11	0	0	0	0	0	0	0	0	11	Fungi{superkingdom}(100);Unassigned{phylum}(0);Unassigned{class}(0);Unassigned{order}(0);Unassigned{family}(0);Unassigned{genus}(0);Unassigned{species}(0)	Fungi	Unassigned	Unassigned	Unassigned	Unassigned	Unassigned	Unassigned
ASV465	0	0	0	0	0	0	0	0	0	0	0	0	50	20	0	70	Fungi{superkingdom}(100);Ascomycota{phylum}(100);Sordariomycetes{class}(100);Hypocreales{order}(100);Stachybotryaceae{family}(100);Stachybotrys{genus}(100);Stachybotrys_microspora{species}(100)	Fungi	Ascomycota	Sordariomycetes	Hypocreales	Stachybotryaceae	Stachybotrys	Stachybotrys_microspora
ASV466	12	113	0	0	0	0	0	43	58	13	0	88	0	0	0	327	Fungi{superkingdom}(64);unidentified{phylum}(64);unidentified{class}(64);unidentified{order}(64);unidentified{family}(64);unidentified{genus}(64);unidentified{species}(64)	Fungi	unidentified	unidentified	unidentified	unidentified	unidentified	unidentified
ASV467	31	0	0	5	13	0	0	0	40	0	0	0	0	0	0	89	Fungi{superkingdom}(66);Ascomycota{phylum}(66);Dothideomycetes{class}(66);Unassigned{order}(0);Unassigned{family}(0);Unassigned{genus}(0);Unassigned{species}(0)	Fungi	Ascomycota	Dothideomycetes	Unassigned	Unassigned	Unassigned	Unassigned
ASV468	0	0	0	0	79	0	0	0	0	0	0	0	0	0	0	79	Fungi{superkingdom}(100);Basidiomycota{phylum}(100);Agaricomycetes{class}(100);Polyporales{order}(100);Irpicaceae{family}(100);Ceriporia{genus}(100);Ceriporia_xylostromatoides{species}(100)	Fungi	Basidiomycota	Agaricomycetes	Polyporales	Irpicaceae	Ceriporia	Ceriporia_xylostromatoides
ASV469	0	0	0	0	0	0	0	0	0	0	0	0	3412	0	0	3412	Fungi{superkingdom}(83);Basidiomycota{phylum}(83);Agaricomycetes{class}(83);Agaricales{order}(83);Bolbitiaceae{family}(83);Conocybe{genus}(83);Conocybe_velutipes{species}(83)	Fungi	Basidiomycota	Agaricomycetes	Agaricales	Bolbitiaceae	Conocybe	Conocybe_velutipes
ASV470	0	0	0	0	4	30	0	0	0	387	0	0	0	0	0	421	Fungi{superkingdom}(61);Ascomycota{phylum}(61);Dothideomycetes{class}(61);Pleosporales{order}(61);unidentified{family}(61);unidentified{genus}(61);unidentified{species}(61)	Fungi	Ascomycota	Dothideomycetes	Pleosporales	unidentified	unidentified	unidentified
ASV471	0	0	0	0	0	0	0	0	0	0	0	0	0	0	25	25	Fungi{superkingdom}(100);Chytridiomycota{phylum}(100);Rhizophlyctidomycetes{class}(100);Rhizophlyctidales{order}(100);Rhizophlyctidaceae{family}(100);Rhizophlyctis{genus}(100);Rhizophlyctis_rosea{species}(100)	Fungi	Chytridiomycota	Rhizophlyctidomycetes	Rhizophlyctidales	Rhizophlyctidaceae	Rhizophlyctis	Rhizophlyctis_rosea
ASV472	0	0	110	0	0	31	11	77	0	0	0	43	46	0	53	371	Fungi{superkingdom}(76);Basidiomycota{phylum}(76);Agaricomycetes{class}(76);unidentified{order}(76);unidentified{family}(76);unidentified{genus}(76);unidentified{species}(76)	Fungi	Basidiomycota	Agaricomycetes	unidentified	unidentified	unidentified	unidentified
ASV473	0	0	0	0	0	0	0	0	0	0	0	0	49	0	0	49	Fungi{superkingdom}(70);Basidiomycota{phylum}(70);Agaricomycetes{class}(70);unidentified{order}(70);unidentified{family}(70);unidentified{genus}(70);unidentified{species}(70)	Fungi	Basidiomycota	Agaricomycetes	unidentified	unidentified	unidentified	unidentified
ASV474	0	0	0	0	0	0	0	0	0	2663	0	0	0	164	0	2827	Fungi{superkingdom}(61);unidentified{phylum}(61);unidentified{class}(61);unidentified{order}(61);unidentified{family}(61);unidentified{genus}(61);unidentified{species}(61)	Fungi	unidentified	unidentified	unidentified	unidentified	unidentified	unidentified
ASV476	7	18	49	61	0	21	0	27	6	0	0	0	0	0	0	189	Fungi{superkingdom}(100);Ascomycota{phylum}(100);Sordariomycetes{class}(100);Hypocreales{order}(100);Bionectriaceae{family}(100);Gliomastix{genus}(100);unidentified{species}(100)	Fungi	Ascomycota	Sordariomycetes	Hypocreales	Bionectriaceae	Gliomastix	unidentified
ASV478	0	0	0	0	6	0	0	0	0	0	0	0	0	0	0	6	Fungi{superkingdom}(100);Unassigned{phylum}(0);Unassigned{class}(0);Unassigned{order}(0);Unassigned{family}(0);Unassigned{genus}(0);Unassigned{species}(0)	Fungi	Unassigned	Unassigned	Unassigned	Unassigned	Unassigned	Unassigned
ASV481	0	0	0	0	255	0	0	0	0	0	0	96	0	0	0	351	Fungi{superkingdom}(100);Glomeromycota{phylum}(100);Glomeromycetes{class}(100);Glomerales{order}(100);Glomeraceae{family}(100);Unassigned{genus}(0);Unassigned{species}(0)	Fungi	Glomeromycota	Glomeromycetes	Glomerales	Glomeraceae	Unassigned	Unassigned
ASV482	0	0	0	0	0	0	0	0	0	0	0	0	0	3325	13	3338	Fungi{superkingdom}(66);unidentified{phylum}(66);unidentified{class}(66);unidentified{order}(66);unidentified{family}(66);unidentified{genus}(66);unidentified{species}(66)	Fungi	unidentified	unidentified	unidentified	unidentified	unidentified	unidentified
ASV484	0	3154	0	0	0	0	0	0	0	0	0	0	0	0	0	3154	Fungi{superkingdom}(92);Ascomycota{phylum}(92);Sordariomycetes{class}(92);Microascales{order}(92);Microascaceae{family}(92);Cephalotrichum{genus}(92);Cephalotrichum_microsporum{species}(92)	Fungi	Ascomycota	Sordariomycetes	Microascales	Microascaceae	Cephalotrichum	Cephalotrichum_microsporum
ASV485	0	0	13	15	38	0	0	0	0	0	0	0	0	0	0	66	Fungi{superkingdom}(100);Ascomycota{phylum}(100);Pezizomycetes{class}(100);Pezizales{order}(100);Pezizaceae{family}(100);unidentified{genus}(100);unidentified{species}(100)	Fungi	Ascomycota	Pezizomycetes	Pezizales	Pezizaceae	unidentified	unidentified
ASV487	0	0	0	0	0	0	0	0	0	32	0	0	0	0	0	32	Fungi{superkingdom}(68);unidentified{phylum}(68);unidentified{class}(68);unidentified{order}(68);unidentified{family}(68);unidentified{genus}(68);unidentified{species}(68)	Fungi	unidentified	unidentified	unidentified	unidentified	unidentified	unidentified
ASV491	96	0	108	30	90	0	0	0	0	0	0	0	0	0	0	324	Fungi{superkingdom}(98);Glomeromycota{phylum}(98);Glomeromycetes{class}(98);Glomerales{order}(98);Glomeraceae{family}(98);Unassigned{genus}(0);Unassigned{species}(0)	Fungi	Glomeromycota	Glomeromycetes	Glomerales	Glomeraceae	Unassigned	Unassigned
ASV492	9	0	0	0	0	51	23	0	63	36	0	0	0	0	17	199	Fungi{superkingdom}(93);Ascomycota{phylum}(93);Sordariomycetes{class}(93);Unassigned{order}(0);Unassigned{family}(0);Unassigned{genus}(0);Unassigned{species}(0)	Fungi	Ascomycota	Sordariomycetes	Unassigned	Unassigned	Unassigned	Unassigned
ASV493	0	0	0	0	0	0	0	31	0	0	0	0	0	0	0	31	Fungi{superkingdom}(85);Ascomycota{phylum}(85);Dothideomycetes{class}(85);Pleosporales{order}(85);Lophiostomataceae{family}(85);Lophiostoma{genus}(85);Lophiostoma_rosae{species}(85)	Fungi	Ascomycota	Dothideomycetes	Pleosporales	Lophiostomataceae	Lophiostoma	Lophiostoma_rosae
ASV494	0	0	19	3	0	0	0	0	0	0	0	0	0	0	0	22	Fungi{superkingdom}(100);Basidiomycota{phylum}(100);Agaricomycetes{class}(100);Polyporales{order}(100);Irpicaceae{family}(100);Ceriporia{genus}(100);Ceriporia_xylostromatoides{species}(100)	Fungi	Basidiomycota	Agaricomycetes	Polyporales	Irpicaceae	Ceriporia	Ceriporia_xylostromatoides
ASV495	0	82	0	0	0	0	0	0	0	0	0	0	0	5	0	87	Fungi{superkingdom}(100);Unassigned{phylum}(0);Unassigned{class}(0);Unassigned{order}(0);Unassigned{family}(0);Unassigned{genus}(0);Unassigned{species}(0)	Fungi	Unassigned	Unassigned	Unassigned	Unassigned	Unassigned	Unassigned
ASV496	0	0	0	12	0	0	0	19	0	0	0	0	91	0	0	122	Fungi{superkingdom}(100);Ascomycota{phylum}(100);Sordariomycetes{class}(100);Hypocreales{order}(100);Hypocreales_fam_Incertae_sedis{family}(100);Acremonium{genus}(100);Acremonium_fusidioides{species}(100)	Fungi	Ascomycota	Sordariomycetes	Hypocreales	Hypocreales_fam_Incertae_sedis	Acremonium	Acremonium_fusidioides
ASV497	0	0	428	0	0	0	0	0	0	0	0	0	0	0	0	428	Fungi{superkingdom}(69);Ascomycota{phylum}(69);Sordariomycetes{class}(69);Hypocreales{order}(69);Hypocreaceae{family}(69);Trichoderma{genus}(69);Trichoderma_aggressivum{species}(69)	Fungi	Ascomycota	Sordariomycetes	Hypocreales	Hypocreaceae	Trichoderma	Trichoderma_aggressivum
ASV499	0	0	0	0	0	0	0	58	0	115	0	0	36	0	0	209	Fungi{superkingdom}(61);unidentified{phylum}(61);unidentified{class}(61);unidentified{order}(61);unidentified{family}(61);unidentified{genus}(61);unidentified{species}(61)	Fungi	unidentified	unidentified	unidentified	unidentified	unidentified	unidentified
ASV500	0	0	0	0	0	0	0	0	0	0	0	0	0	0	27	27	Fungi{superkingdom}(77);Basidiomycota{phylum}(77);Agaricomycetes{class}(77);unidentified{order}(77);unidentified{family}(77);unidentified{genus}(77);unidentified{species}(77)	Fungi	Basidiomycota	Agaricomycetes	unidentified	unidentified	unidentified	unidentified
ASV501	0	0	16	0	0	0	11	0	0	40	0	0	66	0	0	133	Fungi{superkingdom}(65);Ascomycota{phylum}(65);Unassigned{class}(0);Unassigned{order}(0);Unassigned{family}(0);Unassigned{genus}(0);Unassigned{species}(0)	Fungi	Ascomycota	Unassigned	Unassigned	Unassigned	Unassigned	Unassigned
ASV503	0	0	0	0	0	0	0	0	0	2921	0	0	0	0	0	2921	Fungi{superkingdom}(86);Basidiomycota{phylum}(86);Agaricomycetes{class}(86);Agaricales{order}(86);Tricholomataceae{family}(86);Melanoleuca{genus}(86);Melanoleuca_communis{species}(86)	Fungi	Basidiomycota	Agaricomycetes	Agaricales	Tricholomataceae	Melanoleuca	Melanoleuca_communis
ASV506	11	0	0	0	0	0	0	0	0	0	0	0	0	0	0	11	Fungi{superkingdom}(84);Ascomycota{phylum}(84);Dothideomycetes{class}(84);Pleosporales{order}(84);Leptosphaeriaceae{family}(84);Sphaerellopsis{genus}(84);Sphaerellopsis_filum{species}(84)	Fungi	Ascomycota	Dothideomycetes	Pleosporales	Leptosphaeriaceae	Sphaerellopsis	Sphaerellopsis_filum
ASV508	0	0	0	0	297	0	0	0	0	0	0	0	0	0	0	297	Fungi{superkingdom}(76);Basidiomycota{phylum}(76);Agaricomycetes{class}(76);Sebacinales{order}(76);unidentified{family}(76);unidentified{genus}(76);unidentified{species}(76)	Fungi	Basidiomycota	Agaricomycetes	Sebacinales	unidentified	unidentified	unidentified
ASV510	0	0	0	0	0	0	0	0	0	0	0	0	0	0	6	6	Fungi{superkingdom}(71);Basidiomycota{phylum}(71);Agaricomycetes{class}(71);unidentified{order}(71);unidentified{family}(71);unidentified{genus}(71);unidentified{species}(71)	Fungi	Basidiomycota	Agaricomycetes	unidentified	unidentified	unidentified	unidentified
ASV511	0	0	0	0	0	0	0	0	0	0	0	46	0	0	0	46	Fungi{superkingdom}(91);Ascomycota{phylum}(91);Sordariomycetes{class}(91);Sordariales{order}(91);Chaetomiaceae{family}(91);unidentified{genus}(91);unidentified{species}(91)	Fungi	Ascomycota	Sordariomycetes	Sordariales	Chaetomiaceae	unidentified	unidentified
ASV512	0	29	0	0	8	0	0	0	0	0	0	0	0	0	0	37	Fungi{superkingdom}(100);Unassigned{phylum}(0);Unassigned{class}(0);Unassigned{order}(0);Unassigned{family}(0);Unassigned{genus}(0);Unassigned{species}(0)	Fungi	Unassigned	Unassigned	Unassigned	Unassigned	Unassigned	Unassigned
ASV515	0	0	0	0	0	0	0	0	0	0	0	0	0	0	19	19	Fungi{superkingdom}(77);Basidiomycota{phylum}(77);Agaricomycetes{class}(77);Agaricales{order}(77);unidentified{family}(77);unidentified{genus}(77);unidentified{species}(77)	Fungi	Basidiomycota	Agaricomycetes	Agaricales	unidentified	unidentified	unidentified
ASV517	0	0	0	8	0	0	0	0	0	0	0	0	0	0	0	8	Fungi{superkingdom}(100);Unassigned{phylum}(0);Unassigned{class}(0);Unassigned{order}(0);Unassigned{family}(0);Unassigned{genus}(0);Unassigned{species}(0)	Fungi	Unassigned	Unassigned	Unassigned	Unassigned	Unassigned	Unassigned
ASV519	8	0	0	0	27	0	0	0	0	0	0	0	0	0	0	35	Fungi{superkingdom}(65);Mortierellomycota{phylum}(65);Mortierellomycetes{class}(65);Mortierellales{order}(65);Mortierellaceae{family}(65);Mortierella{genus}(65);unidentified{species}(65)	Fungi	Mortierellomycota	Mortierellomycetes	Mortierellales	Mortierellaceae	Mortierella	unidentified
ASV520	0	86	0	0	0	0	22	0	0	0	0	0	0	0	25	133	Fungi{superkingdom}(100);Unassigned{phylum}(0);Unassigned{class}(0);Unassigned{order}(0);Unassigned{family}(0);Unassigned{genus}(0);Unassigned{species}(0)	Fungi	Unassigned	Unassigned	Unassigned	Unassigned	Unassigned	Unassigned
ASV522	0	0	0	0	44	0	0	0	0	0	0	0	0	0	0	44	Fungi{superkingdom}(99);Ascomycota{phylum}(99);Dothideomycetes{class}(99);Pleosporales{order}(99);Lentitheciaceae{family}(99);Keissleriella{genus}(99);Keissleriella_quadriseptata{species}(99)	Fungi	Ascomycota	Dothideomycetes	Pleosporales	Lentitheciaceae	Keissleriella	Keissleriella_quadriseptata
ASV523	0	20	0	0	0	0	0	0	0	0	0	0	0	0	0	20	Fungi{superkingdom}(100);Unassigned{phylum}(0);Unassigned{class}(0);Unassigned{order}(0);Unassigned{family}(0);Unassigned{genus}(0);Unassigned{species}(0)	Fungi	Unassigned	Unassigned	Unassigned	Unassigned	Unassigned	Unassigned
ASV526	0	0	0	0	0	52	0	0	35	0	0	0	91	35	0	213	Fungi{superkingdom}(71);unidentified{phylum}(71);unidentified{class}(71);unidentified{order}(71);unidentified{family}(71);unidentified{genus}(71);unidentified{species}(71)	Fungi	unidentified	unidentified	unidentified	unidentified	unidentified	unidentified
ASV527	0	132	0	0	0	0	0	0	0	0	0	79	0	0	0	211	Fungi{superkingdom}(77);Basidiomycota{phylum}(77);Agaricomycetes{class}(77);Agaricales{order}(77);Entolomataceae{family}(77);Entoloma{genus}(77);Entoloma_rusticoides{species}(77)	Fungi	Basidiomycota	Agaricomycetes	Agaricales	Entolomataceae	Entoloma	Entoloma_rusticoides
ASV536	0	0	0	0	0	0	0	0	0	0	0	143	0	0	0	143	Fungi{superkingdom}(82);Glomeromycota{phylum}(82);Glomeromycetes{class}(82);Glomerales{order}(82);Glomeraceae{family}(82);Glomus{genus}(82);Glomus_aggregatum{species}(82)	Fungi	Glomeromycota	Glomeromycetes	Glomerales	Glomeraceae	Glomus	Glomus_aggregatum
ASV538	0	30	29	0	0	26	0	57	0	11	0	35	125	0	22	335	Fungi{superkingdom}(75);Ascomycota{phylum}(75);Pezizomycetes{class}(75);Pezizales{order}(75);Pezizaceae{family}(75);Iodophanus{genus}(75);Iodophanus_carneus{species}(75)	Fungi	Ascomycota	Pezizomycetes	Pezizales	Pezizaceae	Iodophanus	Iodophanus_carneus
ASV545	0	34	103	0	0	0	0	0	47	13	0	0	48	0	0	245	Fungi{superkingdom}(66);Basidiomycota{phylum}(66);Agaricomycetes{class}(66);unidentified{order}(66);unidentified{family}(66);unidentified{genus}(66);unidentified{species}(66)	Fungi	Basidiomycota	Agaricomycetes	unidentified	unidentified	unidentified	unidentified
ASV546	0	0	0	0	0	0	0	0	0	226	0	0	0	0	0	226	Fungi{superkingdom}(75);unidentified{phylum}(75);unidentified{class}(75);unidentified{order}(75);unidentified{family}(75);unidentified{genus}(75);unidentified{species}(75)	Fungi	unidentified	unidentified	unidentified	unidentified	unidentified	unidentified
ASV547	0	78	0	0	0	0	0	0	0	0	74	0	0	0	0	152	Fungi{superkingdom}(65);Basidiomycota{phylum}(65);Agaricomycetes{class}(65);Cantharellales{order}(65);Ceratobasidiaceae{family}(65);Ceratobasidium{genus}(65);unidentified{species}(65)	Fungi	Basidiomycota	Agaricomycetes	Cantharellales	Ceratobasidiaceae	Ceratobasidium	unidentified
ASV548	0	0	0	0	0	0	0	0	0	0	0	0	0	0	32	32	Fungi{superkingdom}(89);Basidiomycota{phylum}(89);Agaricomycetes{class}(89);Agaricales{order}(89);Unassigned{family}(0);Unassigned{genus}(0);Unassigned{species}(0)	Fungi	Basidiomycota	Agaricomycetes	Agaricales	Unassigned	Unassigned	Unassigned
ASV549	0	0	0	0	0	0	14	66	0	0	21	0	0	0	0	101	Fungi{superkingdom}(73);Basidiomycota{phylum}(73);Agaricomycetes{class}(73);Cantharellales{order}(73);Ceratobasidiaceae{family}(73);unidentified{genus}(73);unidentified{species}(73)	Fungi	Basidiomycota	Agaricomycetes	Cantharellales	Ceratobasidiaceae	unidentified	unidentified
ASV552	0	0	0	0	0	0	0	0	39	0	0	0	0	0	0	39	Fungi{superkingdom}(100);Ascomycota{phylum}(100);Eurotiomycetes{class}(100);Chaetothyriales{order}(100);Trichomeriaceae{family}(100);Knufia{genus}(100);Knufia_tsunedae{species}(100)	Fungi	Ascomycota	Eurotiomycetes	Chaetothyriales	Trichomeriaceae	Knufia	Knufia_tsunedae
ASV553	0	0	0	0	0	8	0	0	0	38	0	224	0	0	0	270	Fungi{superkingdom}(76);Ascomycota{phylum}(76);Dothideomycetes{class}(76);Pleosporales{order}(76);Lophiostomataceae{family}(76);Lophiostoma{genus}(76);Lophiostoma_rosae{species}(76)	Fungi	Ascomycota	Dothideomycetes	Pleosporales	Lophiostomataceae	Lophiostoma	Lophiostoma_rosae
ASV554	0	0	0	0	0	0	0	0	0	0	0	0	2755	0	0	2755	Fungi{superkingdom}(95);Basidiomycota{phylum}(95);Agaricomycetes{class}(95);Agaricales{order}(95);Bolbitiaceae{family}(95);Conocybe{genus}(95);Conocybe_velutipes{species}(95)	Fungi	Basidiomycota	Agaricomycetes	Agaricales	Bolbitiaceae	Conocybe	Conocybe_velutipes
ASV559	0	0	0	0	0	0	5	0	54	6	0	218	340	0	9	632	Fungi{superkingdom}(100);Unassigned{phylum}(0);Unassigned{class}(0);Unassigned{order}(0);Unassigned{family}(0);Unassigned{genus}(0);Unassigned{species}(0)	Fungi	Unassigned	Unassigned	Unassigned	Unassigned	Unassigned	Unassigned
ASV560	19	0	72	3	189	292	49	132	0	0	0	0	0	0	19	775	Fungi{superkingdom}(94);unidentified{phylum}(94);unidentified{class}(94);unidentified{order}(94);unidentified{family}(94);unidentified{genus}(94);unidentified{species}(94)	Fungi	unidentified	unidentified	unidentified	unidentified	unidentified	unidentified
ASV561	0	0	104	0	0	0	0	37	0	0	0	0	0	0	0	141	Fungi{superkingdom}(88);Basidiomycota{phylum}(88);Agaricomycetes{class}(88);Cantharellales{order}(88);Ceratobasidiaceae{family}(88);unidentified{genus}(88);unidentified{species}(88)	Fungi	Basidiomycota	Agaricomycetes	Cantharellales	Ceratobasidiaceae	unidentified	unidentified
ASV563	0	0	23	0	0	0	14	0	0	0	14	20	28	0	48	147	Fungi{superkingdom}(76);Ascomycota{phylum}(76);Dothideomycetes{class}(76);Pleosporales{order}(76);Didymellaceae{family}(76);Ascochyta{genus}(76);Unassigned{species}(0)	Fungi	Ascomycota	Dothideomycetes	Pleosporales	Didymellaceae	Ascochyta	Unassigned
ASV564	0	0	0	0	0	0	0	0	0	0	0	0	134	0	0	134	Fungi{superkingdom}(99);Ascomycota{phylum}(99);Sordariomycetes{class}(99);Sordariales{order}(99);Chaetomiaceae{family}(99);Chaetomium{genus}(99);Chaetomium_elatum{species}(99)	Fungi	Ascomycota	Sordariomycetes	Sordariales	Chaetomiaceae	Chaetomium	Chaetomium_elatum
ASV565	0	0	0	0	0	0	0	0	0	280	94	0	0	0	0	374	Fungi{superkingdom}(66);unidentified{phylum}(66);unidentified{class}(66);unidentified{order}(66);unidentified{family}(66);unidentified{genus}(66);unidentified{species}(66)	Fungi	unidentified	unidentified	unidentified	unidentified	unidentified	unidentified
ASV567	0	0	0	0	0	0	0	24	0	0	0	0	0	0	0	24	Fungi{superkingdom}(88);Ascomycota{phylum}(88);Dothideomycetes{class}(88);Pleosporales{order}(88);Pleosporaceae{family}(88);Comoclathris{genus}(88);unidentified{species}(88)	Fungi	Ascomycota	Dothideomycetes	Pleosporales	Pleosporaceae	Comoclathris	unidentified
ASV569	0	73	0	0	0	0	0	0	0	0	0	179	0	0	0	252	Fungi{superkingdom}(100);Mortierellomycota{phylum}(100);Mortierellomycetes{class}(100);Mortierellales{order}(100);Mortierellaceae{family}(100);Mortierella{genus}(100);Mortierella_alpina{species}(100)	Fungi	Mortierellomycota	Mortierellomycetes	Mortierellales	Mortierellaceae	Mortierella	Mortierella_alpina
ASV574	0	0	0	0	0	0	0	0	55	0	0	0	50	0	0	105	Fungi{superkingdom}(68);Ascomycota{phylum}(68);Unassigned{class}(0);Unassigned{order}(0);Unassigned{family}(0);Unassigned{genus}(0);Unassigned{species}(0)	Fungi	Ascomycota	Unassigned	Unassigned	Unassigned	Unassigned	Unassigned
ASV575	0	0	0	0	0	60	0	0	0	0	0	0	0	0	0	60	Fungi{superkingdom}(100);Basidiomycota{phylum}(100);Agaricomycetes{class}(100);Agaricales{order}(100);Entolomataceae{family}(100);Entoloma{genus}(100);Unassigned{species}(0)	Fungi	Basidiomycota	Agaricomycetes	Agaricales	Entolomataceae	Entoloma	Unassigned
ASV578	0	0	0	0	0	0	0	44	0	0	0	0	0	0	0	44	Fungi{superkingdom}(100);Unassigned{phylum}(0);Unassigned{class}(0);Unassigned{order}(0);Unassigned{family}(0);Unassigned{genus}(0);Unassigned{species}(0)	Fungi	Unassigned	Unassigned	Unassigned	Unassigned	Unassigned	Unassigned
ASV579	8	0	0	0	0	0	0	0	237	0	0	0	0	7	160	412	Fungi{superkingdom}(100);Mortierellomycota{phylum}(100);Mortierellomycetes{class}(100);Mortierellales{order}(100);Mortierellaceae{family}(100);Mortierella{genus}(100);Unassigned{species}(0)	Fungi	Mortierellomycota	Mortierellomycetes	Mortierellales	Mortierellaceae	Mortierella	Unassigned
ASV581	0	0	0	0	0	0	0	0	0	0	0	0	0	15	0	15	Fungi{superkingdom}(75);Ascomycota{phylum}(75);Dothideomycetes{class}(75);Pleosporales{order}(75);Sporormiaceae{family}(75);Sporormiella{genus}(75);Sporormiella_megalospora{species}(75)	Fungi	Ascomycota	Dothideomycetes	Pleosporales	Sporormiaceae	Sporormiella	Sporormiella_megalospora
ASV582	0	0	0	0	0	0	0	0	0	37	0	0	0	0	0	37	Fungi{superkingdom}(100);Unassigned{phylum}(0);Unassigned{class}(0);Unassigned{order}(0);Unassigned{family}(0);Unassigned{genus}(0);Unassigned{species}(0)	Fungi	Unassigned	Unassigned	Unassigned	Unassigned	Unassigned	Unassigned
ASV583	0	0	0	98	0	0	799	31	0	0	0	0	0	0	0	928	Fungi{superkingdom}(93);Ascomycota{phylum}(93);Eurotiomycetes{class}(93);Eurotiales{order}(93);Aspergillaceae{family}(93);Aspergillus{genus}(93);Aspergillus_unilateralis{species}(93)	Fungi	Ascomycota	Eurotiomycetes	Eurotiales	Aspergillaceae	Aspergillus	Aspergillus_unilateralis
ASV585	6	0	0	0	0	0	0	0	0	0	0	0	0	0	0	6	Fungi{superkingdom}(100);Mortierellomycota{phylum}(100);Mortierellomycetes{class}(100);Mortierellales{order}(100);Mortierellaceae{family}(100);Mortierella{genus}(100);Unassigned{species}(0)	Fungi	Mortierellomycota	Mortierellomycetes	Mortierellales	Mortierellaceae	Mortierella	Unassigned
ASV586	0	0	0	0	0	0	0	0	0	0	0	0	2490	0	0	2490	Fungi{superkingdom}(87);Basidiomycota{phylum}(87);Agaricomycetes{class}(87);Agaricales{order}(87);Tricholomataceae{family}(87);Melanoleuca{genus}(87);Melanoleuca_communis{species}(87)	Fungi	Basidiomycota	Agaricomycetes	Agaricales	Tricholomataceae	Melanoleuca	Melanoleuca_communis
ASV587	31	0	0	0	20	0	0	0	0	0	0	0	0	0	0	51	Fungi{superkingdom}(100);Ascomycota{phylum}(100);Arthoniomycetes{class}(100);Lichenostigmatales{order}(100);Phaeococcomycetaceae{family}(100);Phaeococcomyces{genus}(100);unidentified{species}(100)	Fungi	Ascomycota	Arthoniomycetes	Lichenostigmatales	Phaeococcomycetaceae	Phaeococcomyces	unidentified
ASV589	0	0	0	0	4	0	0	0	0	0	0	0	0	0	0	4	Fungi{superkingdom}(100);Ascomycota{phylum}(100);Dothideomycetes{class}(100);Pleosporales{order}(100);Pleosporales_fam_Incertae_sedis{family}(100);Thyrostroma{genus}(100);Thyrostroma_cornicola{species}(100)	Fungi	Ascomycota	Dothideomycetes	Pleosporales	Pleosporales_fam_Incertae_sedis	Thyrostroma	Thyrostroma_cornicola
ASV590	0	0	0	0	6	36	0	28	0	44	0	23	0	0	0	137	Fungi{superkingdom}(97);Chytridiomycota{phylum}(97);Rhizophlyctidomycetes{class}(97);Rhizophlyctidales{order}(97);Rhizophlyctidaceae{family}(97);Rhizophlyctis{genus}(97);unidentified{species}(97)	Fungi	Chytridiomycota	Rhizophlyctidomycetes	Rhizophlyctidales	Rhizophlyctidaceae	Rhizophlyctis	unidentified
ASV591	0	37	0	11	0	0	0	0	0	0	0	0	0	0	0	48	Fungi{superkingdom}(98);Ascomycota{phylum}(98);Eurotiomycetes{class}(98);Chaetothyriales{order}(98);Trichomeriaceae{family}(98);Knufia{genus}(98);Unassigned{species}(0)	Fungi	Ascomycota	Eurotiomycetes	Chaetothyriales	Trichomeriaceae	Knufia	Unassigned
ASV595	0	0	0	0	27	0	0	0	0	220	0	0	0	0	0	247	Fungi{superkingdom}(70);Ascomycota{phylum}(70);Dothideomycetes{class}(70);Pleosporales{order}(70);Camarosporidiellaceae{family}(70);Camarosporidiella{genus}(70);Camarosporidiella_mackenziei{species}(70)	Fungi	Ascomycota	Dothideomycetes	Pleosporales	Camarosporidiellaceae	Camarosporidiella	Camarosporidiella_mackenziei
ASV599	346	0	0	110	0	0	0	0	0	0	0	0	0	0	0	456	Fungi{superkingdom}(100);Glomeromycota{phylum}(100);Glomeromycetes{class}(100);Glomerales{order}(100);Glomeraceae{family}(100);Unassigned{genus}(0);Unassigned{species}(0)	Fungi	Glomeromycota	Glomeromycetes	Glomerales	Glomeraceae	Unassigned	Unassigned
ASV600	0	0	0	6	0	0	0	0	0	0	0	0	0	0	0	6	Fungi{superkingdom}(100);Ascomycota{phylum}(100);Dothideomycetes{class}(100);Pleosporales{order}(100);Pleosporales_fam_Incertae_sedis{family}(100);Massariosphaeria{genus}(100);Massariosphaeria_roumeguerei{species}(100)	Fungi	Ascomycota	Dothideomycetes	Pleosporales	Pleosporales_fam_Incertae_sedis	Massariosphaeria	Massariosphaeria_roumeguerei
ASV601	0	0	0	7	0	0	0	0	0	0	0	0	0	0	0	7	Fungi{superkingdom}(71);Basidiomycota{phylum}(71);Agaricomycetes{class}(71);Agaricales{order}(71);Agaricaceae{family}(71);Leucoagaricus{genus}(71);unidentified{species}(71)	Fungi	Basidiomycota	Agaricomycetes	Agaricales	Agaricaceae	Leucoagaricus	unidentified
ASV602	0	0	0	0	0	0	0	0	38	0	0	0	29	0	24	91	Fungi{superkingdom}(77);Basidiomycota{phylum}(77);Agaricomycetes{class}(77);Agaricales{order}(77);Entolomataceae{family}(77);Entoloma{genus}(77);Entoloma_phaeocyathus{species}(77)	Fungi	Basidiomycota	Agaricomycetes	Agaricales	Entolomataceae	Entoloma	Entoloma_phaeocyathus
ASV611	0	0	0	0	50	0	0	0	0	0	0	0	0	0	0	50	Fungi{superkingdom}(84);Ascomycota{phylum}(84);Sordariomycetes{class}(84);Hypocreales{order}(84);Nectriaceae{family}(84);Fusicolla{genus}(84);Fusicolla_acetilerea{species}(84)	Fungi	Ascomycota	Sordariomycetes	Hypocreales	Nectriaceae	Fusicolla	Fusicolla_acetilerea
ASV613	0	56	7	0	148	0	0	0	0	0	0	36	0	0	0	247	Fungi{superkingdom}(62);unidentified{phylum}(62);unidentified{class}(62);unidentified{order}(62);unidentified{family}(62);unidentified{genus}(62);unidentified{species}(62)	Fungi	unidentified	unidentified	unidentified	unidentified	unidentified	unidentified
ASV614	0	0	0	0	0	0	0	41	0	0	0	0	0	0	0	41	Fungi{superkingdom}(100);Unassigned{phylum}(0);Unassigned{class}(0);Unassigned{order}(0);Unassigned{family}(0);Unassigned{genus}(0);Unassigned{species}(0)	Fungi	Unassigned	Unassigned	Unassigned	Unassigned	Unassigned	Unassigned
ASV622	0	0	0	0	40	0	0	15	0	24	0	0	0	0	0	79	Fungi{superkingdom}(100);Ascomycota{phylum}(100);Sordariomycetes{class}(100);Sordariales{order}(100);Chaetomiaceae{family}(100);Chaetomium{genus}(100);Chaetomium_iranianum{species}(100)	Fungi	Ascomycota	Sordariomycetes	Sordariales	Chaetomiaceae	Chaetomium	Chaetomium_iranianum
ASV625	0	0	0	0	0	0	0	1741	0	0	0	0	0	0	0	1741	Fungi{superkingdom}(100);Mucoromycota{phylum}(100);Mucoromycetes{class}(100);Mucorales{order}(100);Rhizopodaceae{family}(100);Rhizopus{genus}(100);Rhizopus_microsporus{species}(100)	Fungi	Mucoromycota	Mucoromycetes	Mucorales	Rhizopodaceae	Rhizopus	Rhizopus_microsporus
ASV626	0	0	0	0	0	0	0	0	0	0	0	93	0	0	0	93	Fungi{superkingdom}(100);Unassigned{phylum}(0);Unassigned{class}(0);Unassigned{order}(0);Unassigned{family}(0);Unassigned{genus}(0);Unassigned{species}(0)	Fungi	Unassigned	Unassigned	Unassigned	Unassigned	Unassigned	Unassigned
ASV627	82	0	0	0	0	0	0	0	36	0	0	0	0	0	0	118	Fungi{superkingdom}(100);Ascomycota{phylum}(100);Dothideomycetes{class}(100);Pleosporales{order}(100);Lentitheciaceae{family}(100);Keissleriella{genus}(100);Keissleriella_quadriseptata{species}(100)	Fungi	Ascomycota	Dothideomycetes	Pleosporales	Lentitheciaceae	Keissleriella	Keissleriella_quadriseptata
ASV628	0	0	0	0	0	0	0	0	0	915	0	0	0	0	0	915	Fungi{superkingdom}(97);Ascomycota{phylum}(97);Dothideomycetes{class}(97);Pleosporales{order}(97);Phaeosphaeriaceae{family}(97);Paraphoma{genus}(97);Paraphoma_chrysanthemicola{species}(97)	Fungi	Ascomycota	Dothideomycetes	Pleosporales	Phaeosphaeriaceae	Paraphoma	Paraphoma_chrysanthemicola
ASV632	0	962	0	0	0	0	0	0	0	0	0	0	0	0	0	962	Fungi{superkingdom}(98);Basidiomycota{phylum}(98);Agaricomycetes{class}(98);Unassigned{order}(0);Unassigned{family}(0);Unassigned{genus}(0);Unassigned{species}(0)	Fungi	Basidiomycota	Agaricomycetes	Unassigned	Unassigned	Unassigned	Unassigned
ASV633	0	0	0	0	0	0	0	32	0	0	0	0	0	0	0	32	Fungi{superkingdom}(100);Ascomycota{phylum}(100);Eurotiomycetes{class}(100);Eurotiales{order}(100);Aspergillaceae{family}(100);Aspergillus{genus}(100);Unassigned{species}(0)	Fungi	Ascomycota	Eurotiomycetes	Eurotiales	Aspergillaceae	Aspergillus	Unassigned
ASV636	0	0	0	0	0	23	0	0	0	0	0	0	42	0	0	65	Fungi{superkingdom}(100);Basidiomycota{phylum}(100);Agaricomycetes{class}(100);Agaricales{order}(100);Tricholomataceae{family}(100);Omphalina{genus}(100);Omphalina_pyxidata{species}(100)	Fungi	Basidiomycota	Agaricomycetes	Agaricales	Tricholomataceae	Omphalina	Omphalina_pyxidata
ASV638	0	0	0	0	0	41	0	0	25	0	0	101	0	0	0	167	Fungi{superkingdom}(97);unidentified{phylum}(97);unidentified{class}(97);unidentified{order}(97);unidentified{family}(97);unidentified{genus}(97);unidentified{species}(97)	Fungi	unidentified	unidentified	unidentified	unidentified	unidentified	unidentified
ASV640	0	0	0	0	0	0	21	61	0	0	0	24	90	0	0	196	Fungi{superkingdom}(99);Ascomycota{phylum}(99);Dothideomycetes{class}(99);Pleosporales{order}(99);Didymosphaeriaceae{family}(99);Paraphaeosphaeria{genus}(99);unidentified{species}(99)	Fungi	Ascomycota	Dothideomycetes	Pleosporales	Didymosphaeriaceae	Paraphaeosphaeria	unidentified
ASV641	0	0	0	0	7	0	0	0	0	0	0	0	0	0	0	7	Fungi{superkingdom}(65);Ascomycota{phylum}(65);Sordariomycetes{class}(65);Unassigned{order}(0);Unassigned{family}(0);Unassigned{genus}(0);Unassigned{species}(0)	Fungi	Ascomycota	Sordariomycetes	Unassigned	Unassigned	Unassigned	Unassigned
ASV642	0	0	29	2	0	17	0	0	83	0	0	0	60	0	0	191	Fungi{superkingdom}(96);Ascomycota{phylum}(96);Eurotiomycetes{class}(96);Chaetothyriales{order}(96);unidentified{family}(96);unidentified{genus}(96);unidentified{species}(96)	Fungi	Ascomycota	Eurotiomycetes	Chaetothyriales	unidentified	unidentified	unidentified
ASV643	0	707	0	0	0	0	0	0	0	0	0	1407	0	0	0	2114	Fungi{superkingdom}(71);Ascomycota{phylum}(71);Dothideomycetes{class}(71);Pleosporales{order}(71);Lophiostomataceae{family}(71);Lophiostoma{genus}(71);Lophiostoma_rosae{species}(71)	Fungi	Ascomycota	Dothideomycetes	Pleosporales	Lophiostomataceae	Lophiostoma	Lophiostoma_rosae
ASV645	13	0	0	0	0	0	10	0	40	10	0	0	0	0	68	141	Fungi{superkingdom}(100);Basidiomycota{phylum}(100);Geminibasidiomycetes{class}(100);Geminibasidiales{order}(100);Geminibasidiaceae{family}(100);Basidioascus{genus}(100);Basidioascus_persicus{species}(100)	Fungi	Basidiomycota	Geminibasidiomycetes	Geminibasidiales	Geminibasidiaceae	Basidioascus	Basidioascus_persicus
ASV646	11	113	122	13	0	0	0	0	0	32	0	0	0	0	0	291	Fungi{superkingdom}(73);Ascomycota{phylum}(73);Eurotiomycetes{class}(73);Chaetothyriales{order}(73);unidentified{family}(73);unidentified{genus}(73);unidentified{species}(73)	Fungi	Ascomycota	Eurotiomycetes	Chaetothyriales	unidentified	unidentified	unidentified
ASV647	8	0	0	6	0	0	0	0	0	0	22	0	0	0	0	36	Fungi{superkingdom}(61);Ascomycota{phylum}(61);Sordariomycetes{class}(61);Hypocreales{order}(61);Bionectriaceae{family}(61);Hydropisphaera{genus}(61);Hydropisphaera_fungicola{species}(61)	Fungi	Ascomycota	Sordariomycetes	Hypocreales	Bionectriaceae	Hydropisphaera	Hydropisphaera_fungicola
ASV649	0	0	0	0	0	0	0	41	0	0	0	42	0	0	0	83	Fungi{superkingdom}(67);Basidiomycota{phylum}(67);Agaricomycetes{class}(67);Cantharellales{order}(67);Ceratobasidiaceae{family}(67);Ceratobasidium{genus}(67);unidentified{species}(67)	Fungi	Basidiomycota	Agaricomycetes	Cantharellales	Ceratobasidiaceae	Ceratobasidium	unidentified
ASV650	0	0	0	0	0	0	0	0	71	0	0	0	399	0	0	470	Fungi{superkingdom}(79);Basidiomycota{phylum}(79);Agaricomycetes{class}(79);Cantharellales{order}(79);Ceratobasidiaceae{family}(79);unidentified{genus}(79);unidentified{species}(79)	Fungi	Basidiomycota	Agaricomycetes	Cantharellales	Ceratobasidiaceae	unidentified	unidentified
ASV651	0	0	72	0	142	0	0	0	82	0	0	0	0	73	0	369	Fungi{superkingdom}(77);unidentified{phylum}(77);unidentified{class}(77);unidentified{order}(77);unidentified{family}(77);unidentified{genus}(77);unidentified{species}(77)	Fungi	unidentified	unidentified	unidentified	unidentified	unidentified	unidentified
ASV654	10	32	40	0	0	0	0	0	0	0	0	0	42	0	0	124	Fungi{superkingdom}(98);Ascomycota{phylum}(98);Sordariomycetes{class}(98);Xylariales{order}(98);Diatrypaceae{family}(98);Monosporascus{genus}(98);Monosporascus_cannonballus{species}(98)	Fungi	Ascomycota	Sordariomycetes	Xylariales	Diatrypaceae	Monosporascus	Monosporascus_cannonballus
ASV655	0	0	0	0	0	0	0	30	0	0	0	0	0	0	0	30	Fungi{superkingdom}(85);unidentified{phylum}(85);unidentified{class}(85);unidentified{order}(85);unidentified{family}(85);unidentified{genus}(85);unidentified{species}(85)	Fungi	unidentified	unidentified	unidentified	unidentified	unidentified	unidentified
ASV659	0	0	0	7	29	0	0	0	0	0	0	0	0	67	0	103	Fungi{superkingdom}(72);Ascomycota{phylum}(72);Dothideomycetes{class}(72);Pleosporales{order}(72);Periconiaceae{family}(72);Periconia{genus}(72);Periconia_macrospinosa{species}(72)	Fungi	Ascomycota	Dothideomycetes	Pleosporales	Periconiaceae	Periconia	Periconia_macrospinosa
ASV660	0	112	0	0	0	0	0	0	0	0	0	0	0	0	0	112	Fungi{superkingdom}(78);Ascomycota{phylum}(78);Unassigned{class}(0);Unassigned{order}(0);Unassigned{family}(0);Unassigned{genus}(0);Unassigned{species}(0)	Fungi	Ascomycota	Unassigned	Unassigned	Unassigned	Unassigned	Unassigned
ASV664	0	0	0	0	0	0	5	0	31	0	27	0	0	0	0	63	Fungi{superkingdom}(99);Kickxellomycota{phylum}(99);Kickxellomycetes{class}(99);Kickxellales{order}(99);Kickxellaceae{family}(99);Ramicandelaber{genus}(99);unidentified{species}(99)	Fungi	Kickxellomycota	Kickxellomycetes	Kickxellales	Kickxellaceae	Ramicandelaber	unidentified
ASV667	0	0	0	0	0	0	0	0	0	0	0	0	1998	0	0	1998	Fungi{superkingdom}(100);Ascomycota{phylum}(100);Sordariomycetes{class}(100);Hypocreales{order}(100);Nectriaceae{family}(100);Unassigned{genus}(0);Unassigned{species}(0)	Fungi	Ascomycota	Sordariomycetes	Hypocreales	Nectriaceae	Unassigned	Unassigned
ASV672	0	0	0	0	0	0	12	0	21	0	0	0	79	2	5	119	Fungi{superkingdom}(99);Ascomycota{phylum}(99);Sordariomycetes{class}(99);Glomerellales{order}(99);Plectosphaerellaceae{family}(99);Verticillium{genus}(99);Verticillium_leptobactrum{species}(99)	Fungi	Ascomycota	Sordariomycetes	Glomerellales	Plectosphaerellaceae	Verticillium	Verticillium_leptobactrum
ASV674	0	0	0	0	0	0	0	0	0	0	0	0	0	0	40	40	Fungi{superkingdom}(100);Ascomycota{phylum}(100);Dothideomycetes{class}(100);Pleosporales{order}(100);Lentitheciaceae{family}(100);Darksidea{genus}(100);Unassigned{species}(0)	Fungi	Ascomycota	Dothideomycetes	Pleosporales	Lentitheciaceae	Darksidea	Unassigned
ASV676	0	0	0	0	25	0	0	0	50	37	0	0	0	0	0	112	Fungi{superkingdom}(100);Unassigned{phylum}(0);Unassigned{class}(0);Unassigned{order}(0);Unassigned{family}(0);Unassigned{genus}(0);Unassigned{species}(0)	Fungi	Unassigned	Unassigned	Unassigned	Unassigned	Unassigned	Unassigned
ASV678	33	0	0	0	0	0	0	0	0	0	0	0	0	0	81	114	Fungi{superkingdom}(76);Ascomycota{phylum}(76);Unassigned{class}(0);Unassigned{order}(0);Unassigned{family}(0);Unassigned{genus}(0);Unassigned{species}(0)	Fungi	Ascomycota	Unassigned	Unassigned	Unassigned	Unassigned	Unassigned
ASV680	0	0	0	0	0	0	0	0	0	0	0	0	151	0	0	151	Fungi{superkingdom}(86);Basidiomycota{phylum}(86);Tremellomycetes{class}(86);Filobasidiales{order}(86);Filobasidiaceae{family}(86);Naganishia{genus}(86);Naganishia_adeliensis{species}(86)	Fungi	Basidiomycota	Tremellomycetes	Filobasidiales	Filobasidiaceae	Naganishia	Naganishia_adeliensis
ASV682	0	0	0	0	0	0	0	0	11	0	0	0	0	0	0	11	Fungi{superkingdom}(100);Unassigned{phylum}(0);Unassigned{class}(0);Unassigned{order}(0);Unassigned{family}(0);Unassigned{genus}(0);Unassigned{species}(0)	Fungi	Unassigned	Unassigned	Unassigned	Unassigned	Unassigned	Unassigned
ASV685	0	0	0	0	0	0	0	21	0	0	0	62	0	0	0	83	Fungi{superkingdom}(68);Basidiomycota{phylum}(68);Agaricomycetes{class}(68);Agaricales{order}(68);Bolbitiaceae{family}(68);Panaeolus{genus}(68);Unassigned{species}(0)	Fungi	Basidiomycota	Agaricomycetes	Agaricales	Bolbitiaceae	Panaeolus	Unassigned
ASV688	0	0	8	5	0	26	45	30	0	208	0	0	0	0	0	322	Fungi{superkingdom}(83);unidentified{phylum}(83);unidentified{class}(83);unidentified{order}(83);unidentified{family}(83);unidentified{genus}(83);unidentified{species}(83)	Fungi	unidentified	unidentified	unidentified	unidentified	unidentified	unidentified
ASV689	71	0	0	0	0	0	0	0	0	0	0	0	0	0	50	121	Fungi{superkingdom}(95);Ascomycota{phylum}(95);Sordariomycetes{class}(95);Hypocreales{order}(95);Nectriaceae{family}(95);Fusarium{genus}(95);Fusarium_solani{species}(95)	Fungi	Ascomycota	Sordariomycetes	Hypocreales	Nectriaceae	Fusarium	Fusarium_solani
ASV693	0	0	10	0	0	0	0	0	0	0	0	0	0	0	0	10	Fungi{superkingdom}(84);unidentified{phylum}(84);unidentified{class}(84);unidentified{order}(84);unidentified{family}(84);unidentified{genus}(84);unidentified{species}(84)	Fungi	unidentified	unidentified	unidentified	unidentified	unidentified	unidentified
ASV695	0	34	0	0	0	0	16	43	0	0	0	0	0	0	0	93	Fungi{superkingdom}(79);Basidiomycota{phylum}(79);Agaricomycetes{class}(79);Cantharellales{order}(79);Ceratobasidiaceae{family}(79);unidentified{genus}(79);unidentified{species}(79)	Fungi	Basidiomycota	Agaricomycetes	Cantharellales	Ceratobasidiaceae	unidentified	unidentified
ASV696	0	0	0	0	0	46	12	37	42	0	10	0	0	23	45	215	Fungi{superkingdom}(62);Ascomycota{phylum}(62);Sordariomycetes{class}(62);Sordariales{order}(62);Lasiosphaeriaceae{family}(62);Unassigned{genus}(0);Unassigned{species}(0)	Fungi	Ascomycota	Sordariomycetes	Sordariales	Lasiosphaeriaceae	Unassigned	Unassigned
ASV703	0	0	0	0	0	0	0	0	0	54	0	0	0	0	0	54	Fungi{superkingdom}(87);Ascomycota{phylum}(87);Dothideomycetes{class}(87);Pleosporales{order}(87);Unassigned{family}(0);Unassigned{genus}(0);Unassigned{species}(0)	Fungi	Ascomycota	Dothideomycetes	Pleosporales	Unassigned	Unassigned	Unassigned
ASV704	0	0	0	0	0	0	0	0	0	181	0	0	0	63	0	244	Fungi{superkingdom}(100);Ascomycota{phylum}(100);Dothideomycetes{class}(100);Pleosporales{order}(100);Sporormiaceae{family}(100);Sporormiella{genus}(100);Sporormiella_similis{species}(100)	Fungi	Ascomycota	Dothideomycetes	Pleosporales	Sporormiaceae	Sporormiella	Sporormiella_similis
ASV705	0	0	0	4	0	0	0	0	0	0	10	0	0	11	0	25	Fungi{superkingdom}(78);Ascomycota{phylum}(78);Pezizomycetes{class}(78);Pezizales{order}(78);Pezizaceae{family}(78);unidentified{genus}(78);unidentified{species}(78)	Fungi	Ascomycota	Pezizomycetes	Pezizales	Pezizaceae	unidentified	unidentified
ASV707	0	0	0	4	0	0	0	0	0	0	0	0	0	0	0	4	Fungi{superkingdom}(100);Chytridiomycota{phylum}(100);Rhizophlyctidomycetes{class}(100);Rhizophlyctidales{order}(100);Rhizophlyctidaceae{family}(100);Rhizophlyctis{genus}(100);unidentified{species}(100)	Fungi	Chytridiomycota	Rhizophlyctidomycetes	Rhizophlyctidales	Rhizophlyctidaceae	Rhizophlyctis	unidentified
ASV711	0	148	0	0	0	0	0	0	0	0	0	0	0	0	0	148	Fungi{superkingdom}(100);Unassigned{phylum}(0);Unassigned{class}(0);Unassigned{order}(0);Unassigned{family}(0);Unassigned{genus}(0);Unassigned{species}(0)	Fungi	Unassigned	Unassigned	Unassigned	Unassigned	Unassigned	Unassigned
ASV714	0	0	0	0	0	0	0	0	0	0	13	1771	0	0	0	1784	Fungi{superkingdom}(74);Ascomycota{phylum}(74);Dothideomycetes{class}(74);Pleosporales{order}(74);Sporormiaceae{family}(74);unidentified{genus}(74);unidentified{species}(74)	Fungi	Ascomycota	Dothideomycetes	Pleosporales	Sporormiaceae	unidentified	unidentified
ASV715	0	0	0	0	0	0	0	0	0	0	0	337	0	0	0	337	Fungi{superkingdom}(100);Ascomycota{phylum}(100);Sordariomycetes{class}(100);Hypocreales{order}(100);Stachybotryaceae{family}(100);Unassigned{genus}(0);Unassigned{species}(0)	Fungi	Ascomycota	Sordariomycetes	Hypocreales	Stachybotryaceae	Unassigned	Unassigned
ASV718	0	0	0	0	0	64	0	0	0	0	0	0	128	0	23	215	Fungi{superkingdom}(89);unidentified{phylum}(89);unidentified{class}(89);unidentified{order}(89);unidentified{family}(89);unidentified{genus}(89);unidentified{species}(89)	Fungi	unidentified	unidentified	unidentified	unidentified	unidentified	unidentified
ASV719	0	0	0	0	0	0	0	0	0	13	0	0	0	0	0	13	Fungi{superkingdom}(73);Ascomycota{phylum}(73);Unassigned{class}(0);Unassigned{order}(0);Unassigned{family}(0);Unassigned{genus}(0);Unassigned{species}(0)	Fungi	Ascomycota	Unassigned	Unassigned	Unassigned	Unassigned	Unassigned
ASV722	0	0	0	0	0	0	0	0	0	105	0	0	0	0	0	105	Fungi{superkingdom}(100);Ascomycota{phylum}(100);Dothideomycetes{class}(100);Pleosporales{order}(100);Phaeosphaeriaceae{family}(100);Setophaeosphaeria{genus}(100);Setophaeosphaeria_sidae{species}(100)	Fungi	Ascomycota	Dothideomycetes	Pleosporales	Phaeosphaeriaceae	Setophaeosphaeria	Setophaeosphaeria_sidae
ASV724	0	0	11	0	0	0	0	0	0	0	0	0	0	0	0	11	Fungi{superkingdom}(100);Unassigned{phylum}(0);Unassigned{class}(0);Unassigned{order}(0);Unassigned{family}(0);Unassigned{genus}(0);Unassigned{species}(0)	Fungi	Unassigned	Unassigned	Unassigned	Unassigned	Unassigned	Unassigned
ASV727	0	0	27	0	0	0	0	0	0	0	0	0	0	0	0	27	Fungi{superkingdom}(65);Ascomycota{phylum}(65);Unassigned{class}(0);Unassigned{order}(0);Unassigned{family}(0);Unassigned{genus}(0);Unassigned{species}(0)	Fungi	Ascomycota	Unassigned	Unassigned	Unassigned	Unassigned	Unassigned
ASV729	0	28	0	62	0	0	0	0	0	0	0	0	0	0	43	133	Fungi{superkingdom}(99);Ascomycota{phylum}(99);Dothideomycetes{class}(99);Pleosporales{order}(99);Phaeosphaeriaceae{family}(99);Paraphoma{genus}(99);Paraphoma_chrysanthemicola{species}(99)	Fungi	Ascomycota	Dothideomycetes	Pleosporales	Phaeosphaeriaceae	Paraphoma	Paraphoma_chrysanthemicola
ASV730	0	39	57	0	0	0	0	0	0	0	0	79	0	0	0	175	Fungi{superkingdom}(100);Unassigned{phylum}(0);Unassigned{class}(0);Unassigned{order}(0);Unassigned{family}(0);Unassigned{genus}(0);Unassigned{species}(0)	Fungi	Unassigned	Unassigned	Unassigned	Unassigned	Unassigned	Unassigned
ASV731	164	0	44	0	0	0	0	0	0	0	0	0	0	0	0	208	Fungi{superkingdom}(95);unidentified{phylum}(95);unidentified{class}(95);unidentified{order}(95);unidentified{family}(95);unidentified{genus}(95);unidentified{species}(95)	Fungi	unidentified	unidentified	unidentified	unidentified	unidentified	unidentified
ASV734	0	0	0	0	0	0	0	0	59	0	0	0	0	0	0	59	Fungi{superkingdom}(68);Basidiomycota{phylum}(68);Agaricomycetes{class}(68);unidentified{order}(68);unidentified{family}(68);unidentified{genus}(68);unidentified{species}(68)	Fungi	Basidiomycota	Agaricomycetes	unidentified	unidentified	unidentified	unidentified
ASV736	0	0	0	0	0	0	10	33	0	0	0	0	0	0	0	43	Fungi{superkingdom}(77);Ascomycota{phylum}(77);Unassigned{class}(0);Unassigned{order}(0);Unassigned{family}(0);Unassigned{genus}(0);Unassigned{species}(0)	Fungi	Ascomycota	Unassigned	Unassigned	Unassigned	Unassigned	Unassigned
ASV740	0	0	0	0	0	0	6	0	0	0	0	0	0	0	0	6	Fungi{superkingdom}(90);Basidiomycota{phylum}(90);Agaricomycetes{class}(90);Agaricales{order}(90);Psathyrellaceae{family}(90);Coprinopsis{genus}(90);Coprinopsis_pseudofriesii{species}(90)	Fungi	Basidiomycota	Agaricomycetes	Agaricales	Psathyrellaceae	Coprinopsis	Coprinopsis_pseudofriesii
ASV743	14	0	0	0	0	52	0	0	58	0	0	0	0	19	0	143	Fungi{superkingdom}(68);Basidiomycota{phylum}(68);Agaricomycetes{class}(68);Agaricales{order}(68);Psathyrellaceae{family}(68);Coprinellus{genus}(68);Coprinellus_callinus{species}(68)	Fungi	Basidiomycota	Agaricomycetes	Agaricales	Psathyrellaceae	Coprinellus	Coprinellus_callinus
ASV744	0	0	0	0	0	0	0	0	15	0	0	0	0	0	0	15	Fungi{superkingdom}(100);Ascomycota{phylum}(100);Sordariomycetes{class}(100);Hypocreales{order}(100);Cordycipitaceae{family}(100);Lecanicillium{genus}(100);Lecanicillium_dimorphum{species}(100)	Fungi	Ascomycota	Sordariomycetes	Hypocreales	Cordycipitaceae	Lecanicillium	Lecanicillium_dimorphum
ASV746	0	0	0	0	0	0	0	0	1311	0	0	0	0	0	0	1311	Fungi{superkingdom}(100);Ascomycota{phylum}(100);Sordariomycetes{class}(100);Branch06{order}(100);unidentified{family}(100);unidentified{genus}(100);unidentified{species}(100)	Fungi	Ascomycota	Sordariomycetes	Branch06	unidentified	unidentified	unidentified
ASV749	0	0	0	0	0	0	717	0	0	0	0	0	0	0	0	717	Fungi{superkingdom}(100);Ascomycota{phylum}(100);Dothideomycetes{class}(100);Pleosporales{order}(100);Morosphaeriaceae{family}(100);Acrocalymma{genus}(100);unidentified{species}(100)	Fungi	Ascomycota	Dothideomycetes	Pleosporales	Morosphaeriaceae	Acrocalymma	unidentified
ASV757	0	0	0	0	0	0	0	0	0	0	0	58	0	0	0	58	Fungi{superkingdom}(99);Ascomycota{phylum}(99);Dothideomycetes{class}(99);Pleosporales{order}(99);Sporormiaceae{family}(99);unidentified{genus}(99);unidentified{species}(99)	Fungi	Ascomycota	Dothideomycetes	Pleosporales	Sporormiaceae	unidentified	unidentified
ASV759	53	0	0	0	0	0	0	0	0	0	0	0	0	0	0	53	Fungi{superkingdom}(100);Ascomycota{phylum}(100);Eurotiomycetes{class}(100);Eurotiales{order}(100);Aspergillaceae{family}(100);Aspergillus{genus}(100);Unassigned{species}(0)	Fungi	Ascomycota	Eurotiomycetes	Eurotiales	Aspergillaceae	Aspergillus	Unassigned
ASV761	0	0	0	0	0	0	0	0	0	0	0	0	1664	0	0	1664	Fungi{superkingdom}(100);Unassigned{phylum}(0);Unassigned{class}(0);Unassigned{order}(0);Unassigned{family}(0);Unassigned{genus}(0);Unassigned{species}(0)	Fungi	Unassigned	Unassigned	Unassigned	Unassigned	Unassigned	Unassigned
ASV766	0	0	0	0	0	0	27	33	0	0	0	0	0	0	50	110	Fungi{superkingdom}(70);unidentified{phylum}(70);unidentified{class}(70);unidentified{order}(70);unidentified{family}(70);unidentified{genus}(70);unidentified{species}(70)	Fungi	unidentified	unidentified	unidentified	unidentified	unidentified	unidentified
ASV772	0	0	0	0	0	0	0	37	0	0	0	0	59	0	53	149	Fungi{superkingdom}(61);Ascomycota{phylum}(61);unidentified{class}(61);unidentified{order}(61);unidentified{family}(61);unidentified{genus}(61);unidentified{species}(61)	Fungi	Ascomycota	unidentified	unidentified	unidentified	unidentified	unidentified
ASV773	0	34	0	3	6	0	0	0	0	0	0	0	0	0	0	43	Fungi{superkingdom}(100);Basidiomycota{phylum}(100);Agaricomycetes{class}(100);Corticiales{order}(100);Corticiaceae{family}(100);Limonomyces{genus}(100);unidentified{species}(100)	Fungi	Basidiomycota	Agaricomycetes	Corticiales	Corticiaceae	Limonomyces	unidentified
ASV777	0	0	0	0	0	0	0	24	0	0	12	0	0	0	0	36	Fungi{superkingdom}(68);unidentified{phylum}(68);unidentified{class}(68);unidentified{order}(68);unidentified{family}(68);unidentified{genus}(68);unidentified{species}(68)	Fungi	unidentified	unidentified	unidentified	unidentified	unidentified	unidentified
ASV778	0	11	53	0	0	0	0	0	90	0	0	54	0	0	58	266	Fungi{superkingdom}(77);Basidiomycota{phylum}(77);Agaricomycetes{class}(77);Cantharellales{order}(77);Ceratobasidiaceae{family}(77);unidentified{genus}(77);unidentified{species}(77)	Fungi	Basidiomycota	Agaricomycetes	Cantharellales	Ceratobasidiaceae	unidentified	unidentified
ASV779	0	0	0	0	11	0	0	0	0	0	0	0	0	0	0	11	Fungi{superkingdom}(87);Ascomycota{phylum}(87);Dothideomycetes{class}(87);Botryosphaeriales{order}(87);Aplosporellaceae{family}(87);Aplosporella{genus}(87);Aplosporella_africana{species}(87)	Fungi	Ascomycota	Dothideomycetes	Botryosphaeriales	Aplosporellaceae	Aplosporella	Aplosporella_africana
ASV784	0	91	0	0	0	0	0	0	0	0	0	0	0	0	0	91	Fungi{superkingdom}(98);Ascomycota{phylum}(98);Eurotiomycetes{class}(98);Chaetothyriales{order}(98);Trichomeriaceae{family}(98);Knufia{genus}(98);unidentified{species}(98)	Fungi	Ascomycota	Eurotiomycetes	Chaetothyriales	Trichomeriaceae	Knufia	unidentified
ASV787	0	0	0	0	4	0	0	0	0	0	0	0	0	0	0	4	Fungi{superkingdom}(77);Ascomycota{phylum}(77);Eurotiomycetes{class}(77);Chaetothyriales{order}(77);Trichomeriaceae{family}(77);Arthrocladium{genus}(77);Unassigned{species}(0)	Fungi	Ascomycota	Eurotiomycetes	Chaetothyriales	Trichomeriaceae	Arthrocladium	Unassigned
ASV788	0	0	0	0	0	0	0	8	0	9	0	0	0	9	0	26	Fungi{superkingdom}(65);Basidiomycota{phylum}(65);Agaricomycetes{class}(65);Agaricales{order}(65);Unassigned{family}(0);Unassigned{genus}(0);Unassigned{species}(0)	Fungi	Basidiomycota	Agaricomycetes	Agaricales	Unassigned	Unassigned	Unassigned
ASV790	0	0	0	0	0	0	0	23	0	0	0	0	0	0	0	23	Fungi{superkingdom}(83);Basidiomycota{phylum}(83);Microbotryomycetes{class}(83);Sporidiobolales{order}(83);Sporidiobolaceae{family}(83);Rhodotorula{genus}(83);Rhodotorula_sphaerocarpa{species}(83)	Fungi	Basidiomycota	Microbotryomycetes	Sporidiobolales	Sporidiobolaceae	Rhodotorula	Rhodotorula_sphaerocarpa
ASV792	9	0	0	0	0	0	0	0	0	15	0	0	44	0	0	68	Fungi{superkingdom}(71);Ascomycota{phylum}(71);unidentified{class}(71);unidentified{order}(71);unidentified{family}(71);unidentified{genus}(71);unidentified{species}(71)	Fungi	Ascomycota	unidentified	unidentified	unidentified	unidentified	unidentified
ASV793	0	0	0	0	0	0	0	0	100	0	0	0	0	0	0	100	Fungi{superkingdom}(100);Basidiomycota{phylum}(100);Cystobasidiomycetes{class}(100);Erythrobasidiales{order}(100);Erythrobasidiaceae{family}(100);Erythrobasidium{genus}(100);Unassigned{species}(0)	Fungi	Basidiomycota	Cystobasidiomycetes	Erythrobasidiales	Erythrobasidiaceae	Erythrobasidium	Unassigned
ASV794	0	67	0	6	38	0	0	0	0	0	0	0	0	0	0	111	Fungi{superkingdom}(84);unidentified{phylum}(84);unidentified{class}(84);unidentified{order}(84);unidentified{family}(84);unidentified{genus}(84);unidentified{species}(84)	Fungi	unidentified	unidentified	unidentified	unidentified	unidentified	unidentified
ASV795	0	0	0	0	0	0	0	0	0	0	0	0	0	17	0	17	Fungi{superkingdom}(100);Basidiomycota{phylum}(100);Agaricostilbomycetes{class}(100);Agaricostilbales{order}(100);Chionosphaeraceae{family}(100);Kurtzmanomyces{genus}(100);Kurtzmanomyces_shapotouensis{species}(100)	Fungi	Basidiomycota	Agaricostilbomycetes	Agaricostilbales	Chionosphaeraceae	Kurtzmanomyces	Kurtzmanomyces_shapotouensis
ASV799	0	23	0	0	639	0	0	0	0	0	102	0	166	0	0	930	Fungi{superkingdom}(92);unidentified{phylum}(92);unidentified{class}(92);unidentified{order}(92);unidentified{family}(92);unidentified{genus}(92);unidentified{species}(92)	Fungi	unidentified	unidentified	unidentified	unidentified	unidentified	unidentified
ASV801	0	0	23	0	0	0	0	0	0	0	0	30	0	0	0	53	Fungi{superkingdom}(67);Basidiomycota{phylum}(67);Agaricomycetes{class}(67);unidentified{order}(67);unidentified{family}(67);unidentified{genus}(67);unidentified{species}(67)	Fungi	Basidiomycota	Agaricomycetes	unidentified	unidentified	unidentified	unidentified
ASV802	23	0	0	6	0	0	0	30	0	0	0	0	0	19	0	78	Fungi{superkingdom}(98);Ascomycota{phylum}(98);Eurotiomycetes{class}(98);Chaetothyriales{order}(98);unidentified{family}(98);unidentified{genus}(98);unidentified{species}(98)	Fungi	Ascomycota	Eurotiomycetes	Chaetothyriales	unidentified	unidentified	unidentified
ASV803	0	56	25	0	0	0	0	0	19	0	0	0	98	0	294	492	Fungi{superkingdom}(74);unidentified{phylum}(74);unidentified{class}(74);unidentified{order}(74);unidentified{family}(74);unidentified{genus}(74);unidentified{species}(74)	Fungi	unidentified	unidentified	unidentified	unidentified	unidentified	unidentified
ASV804	45	0	0	0	10	0	0	0	40	0	0	0	0	0	0	95	Fungi{superkingdom}(92);Basidiomycota{phylum}(92);Tremellomycetes{class}(92);Tremellales{order}(92);Bulleraceae{family}(92);Genolevuria{genus}(92);Genolevuria_armeniaca{species}(92)	Fungi	Basidiomycota	Tremellomycetes	Tremellales	Bulleraceae	Genolevuria	Genolevuria_armeniaca
ASV813	0	15	0	0	0	0	0	0	0	0	0	0	0	0	0	15	Fungi{superkingdom}(99);Ascomycota{phylum}(99);Sordariomycetes{class}(99);Hypocreales{order}(99);Cordycipitaceae{family}(99);Lecanicillium{genus}(99);Lecanicillium_saksenae{species}(99)	Fungi	Ascomycota	Sordariomycetes	Hypocreales	Cordycipitaceae	Lecanicillium	Lecanicillium_saksenae
ASV814	0	0	0	0	13	0	0	0	0	0	0	0	0	0	0	13	Fungi{superkingdom}(69);Ascomycota{phylum}(69);Dothideomycetes{class}(69);Pleosporales{order}(69);Unassigned{family}(0);Unassigned{genus}(0);Unassigned{species}(0)	Fungi	Ascomycota	Dothideomycetes	Pleosporales	Unassigned	Unassigned	Unassigned
ASV815	0	366	0	0	0	0	0	0	0	0	0	0	0	0	0	366	Fungi{superkingdom}(90);Ascomycota{phylum}(90);Eurotiomycetes{class}(90);Chaetothyriales{order}(90);Trichomeriaceae{family}(90);Arthrocladium{genus}(90);Unassigned{species}(0)	Fungi	Ascomycota	Eurotiomycetes	Chaetothyriales	Trichomeriaceae	Arthrocladium	Unassigned
ASV822	0	76	0	0	0	0	0	19	0	0	0	0	0	0	0	95	Fungi{superkingdom}(100);Unassigned{phylum}(0);Unassigned{class}(0);Unassigned{order}(0);Unassigned{family}(0);Unassigned{genus}(0);Unassigned{species}(0)	Fungi	Unassigned	Unassigned	Unassigned	Unassigned	Unassigned	Unassigned
ASV823	0	0	0	0	0	0	0	0	0	129	0	0	0	0	0	129	Fungi{superkingdom}(71);unidentified{phylum}(71);unidentified{class}(71);unidentified{order}(71);unidentified{family}(71);unidentified{genus}(71);unidentified{species}(71)	Fungi	unidentified	unidentified	unidentified	unidentified	unidentified	unidentified
ASV824	0	0	0	0	0	0	0	0	87	0	0	0	0	0	0	87	Fungi{superkingdom}(93);Ascomycota{phylum}(93);Sordariomycetes{class}(93);Sordariales{order}(93);Chaetomiaceae{family}(93);Acrophialophora{genus}(93);Acrophialophora_levis{species}(93)	Fungi	Ascomycota	Sordariomycetes	Sordariales	Chaetomiaceae	Acrophialophora	Acrophialophora_levis
ASV825	26	0	0	0	0	37	0	38	0	0	0	0	0	0	0	101	Fungi{superkingdom}(76);unidentified{phylum}(76);unidentified{class}(76);unidentified{order}(76);unidentified{family}(76);unidentified{genus}(76);unidentified{species}(76)	Fungi	unidentified	unidentified	unidentified	unidentified	unidentified	unidentified
ASV826	0	97	0	0	0	0	0	12	86	0	0	0	53	0	0	248	Fungi{superkingdom}(81);Chytridiomycota{phylum}(81);GS13{class}(81);unidentified{order}(81);unidentified{family}(81);unidentified{genus}(81);unidentified{species}(81)	Fungi	Chytridiomycota	GS13	unidentified	unidentified	unidentified	unidentified
ASV827	0	0	0	0	0	0	0	263	0	0	0	0	0	0	0	263	Fungi{superkingdom}(100);Unassigned{phylum}(0);Unassigned{class}(0);Unassigned{order}(0);Unassigned{family}(0);Unassigned{genus}(0);Unassigned{species}(0)	Fungi	Unassigned	Unassigned	Unassigned	Unassigned	Unassigned	Unassigned
ASV829	0	53	51	0	0	0	0	0	51	14	29	0	0	0	76	274	Fungi{superkingdom}(72);Basidiomycota{phylum}(72);Agaricomycetes{class}(72);Agaricales{order}(72);Bolbitiaceae{family}(72);Conocybe{genus}(72);Conocybe_velutipes{species}(72)	Fungi	Basidiomycota	Agaricomycetes	Agaricales	Bolbitiaceae	Conocybe	Conocybe_velutipes
ASV830	0	0	0	0	0	0	0	0	0	89	0	0	0	0	0	89	Fungi{superkingdom}(98);Chytridiomycota{phylum}(98);Spizellomycetes{class}(98);Spizellomycetales{order}(98);Spizellomycetaceae{family}(98);unidentified{genus}(98);unidentified{species}(98)	Fungi	Chytridiomycota	Spizellomycetes	Spizellomycetales	Spizellomycetaceae	unidentified	unidentified
ASV832	0	0	0	0	0	0	0	46	0	0	0	30	0	0	56	132	Fungi{superkingdom}(67);unidentified{phylum}(67);unidentified{class}(67);unidentified{order}(67);unidentified{family}(67);unidentified{genus}(67);unidentified{species}(67)	Fungi	unidentified	unidentified	unidentified	unidentified	unidentified	unidentified
ASV836	0	0	0	0	0	76	0	0	0	0	244	0	0	0	0	320	Fungi{superkingdom}(100);Ascomycota{phylum}(100);Sordariomycetes{class}(100);Hypocreales{order}(100);Nectriaceae{family}(100);Ilyonectria{genus}(100);Ilyonectria_macrodidyma{species}(100)	Fungi	Ascomycota	Sordariomycetes	Hypocreales	Nectriaceae	Ilyonectria	Ilyonectria_macrodidyma
ASV839	0	0	0	0	0	30	42	0	0	0	0	0	0	0	0	72	Fungi{superkingdom}(71);Glomeromycota{phylum}(71);Glomeromycetes{class}(71);Glomerales{order}(71);Glomeraceae{family}(71);Glomus{genus}(71);Glomus_cubense{species}(71)	Fungi	Glomeromycota	Glomeromycetes	Glomerales	Glomeraceae	Glomus	Glomus_cubense
ASV840	0	0	0	0	6	0	0	0	0	0	0	0	0	0	0	6	Fungi{superkingdom}(100);Ascomycota{phylum}(100);Eurotiomycetes{class}(100);Eurotiales{order}(100);Aspergillaceae{family}(100);Aspergillus{genus}(100);Aspergillus_discophorus{species}(100)	Fungi	Ascomycota	Eurotiomycetes	Eurotiales	Aspergillaceae	Aspergillus	Aspergillus_discophorus
ASV843	0	0	0	0	0	0	0	0	0	0	27	31	0	0	0	58	Fungi{superkingdom}(60);Chytridiomycota{phylum}(60);Unassigned{class}(0);Unassigned{order}(0);Unassigned{family}(0);Unassigned{genus}(0);Unassigned{species}(0)	Fungi	Chytridiomycota	Unassigned	Unassigned	Unassigned	Unassigned	Unassigned
ASV846	0	88	27	0	0	0	0	0	0	199	0	0	0	0	0	314	Fungi{superkingdom}(68);Ascomycota{phylum}(68);Sordariomycetes{class}(68);Sordariales{order}(68);Unassigned{family}(0);Unassigned{genus}(0);Unassigned{species}(0)	Fungi	Ascomycota	Sordariomycetes	Sordariales	Unassigned	Unassigned	Unassigned
ASV848	0	79	0	0	0	0	0	0	0	0	0	0	0	0	0	79	Fungi{superkingdom}(97);Ascomycota{phylum}(97);Eurotiomycetes{class}(97);Chaetothyriales{order}(97);Trichomeriaceae{family}(97);Bradymyces{genus}(97);unidentified{species}(97)	Fungi	Ascomycota	Eurotiomycetes	Chaetothyriales	Trichomeriaceae	Bradymyces	unidentified
ASV851	0	0	0	0	0	0	0	0	0	0	0	0	0	6	0	6	Fungi{superkingdom}(65);Ascomycota{phylum}(65);Dothideomycetes{class}(65);Capnodiales{order}(65);Cladosporiaceae{family}(65);Rachicladosporium{genus}(65);Rachicladosporium_paucitum{species}(65)	Fungi	Ascomycota	Dothideomycetes	Capnodiales	Cladosporiaceae	Rachicladosporium	Rachicladosporium_paucitum
ASV852	0	0	0	0	0	0	0	38	0	0	0	0	0	0	0	38	Fungi{superkingdom}(96);unidentified{phylum}(96);unidentified{class}(96);unidentified{order}(96);unidentified{family}(96);unidentified{genus}(96);unidentified{species}(96)	Fungi	unidentified	unidentified	unidentified	unidentified	unidentified	unidentified
ASV854	0	0	0	0	0	0	0	17	0	0	0	0	0	0	0	17	Fungi{superkingdom}(100);Unassigned{phylum}(0);Unassigned{class}(0);Unassigned{order}(0);Unassigned{family}(0);Unassigned{genus}(0);Unassigned{species}(0)	Fungi	Unassigned	Unassigned	Unassigned	Unassigned	Unassigned	Unassigned
ASV855	0	0	0	0	0	0	0	0	0	0	0	0	0	0	1353	1353	Fungi{superkingdom}(100);Unassigned{phylum}(0);Unassigned{class}(0);Unassigned{order}(0);Unassigned{family}(0);Unassigned{genus}(0);Unassigned{species}(0)	Fungi	Unassigned	Unassigned	Unassigned	Unassigned	Unassigned	Unassigned
ASV857	0	0	0	0	0	0	0	0	17	29	0	0	0	0	0	46	Fungi{superkingdom}(100);Ascomycota{phylum}(100);Sordariomycetes{class}(100);Hypocreales{order}(100);Hypocreales_fam_Incertae_sedis{family}(100);Acremonium{genus}(100);Acremonium_alternatum{species}(100)	Fungi	Ascomycota	Sordariomycetes	Hypocreales	Hypocreales_fam_Incertae_sedis	Acremonium	Acremonium_alternatum
ASV864	0	0	0	0	0	17	0	0	0	0	0	0	28	0	0	45	Fungi{superkingdom}(72);unidentified{phylum}(72);unidentified{class}(72);unidentified{order}(72);unidentified{family}(72);unidentified{genus}(72);unidentified{species}(72)	Fungi	unidentified	unidentified	unidentified	unidentified	unidentified	unidentified
ASV866	0	0	0	0	0	0	25	0	0	0	0	0	0	0	0	25	Fungi{superkingdom}(99);Ascomycota{phylum}(99);Leotiomycetes{class}(99);Helotiales{order}(99);Helotiaceae{family}(99);Tetracladium{genus}(99);Unassigned{species}(0)	Fungi	Ascomycota	Leotiomycetes	Helotiales	Helotiaceae	Tetracladium	Unassigned
ASV872	0	38	0	0	0	0	0	0	0	0	0	0	0	0	0	38	Fungi{superkingdom}(73);unidentified{phylum}(73);unidentified{class}(73);unidentified{order}(73);unidentified{family}(73);unidentified{genus}(73);unidentified{species}(73)	Fungi	unidentified	unidentified	unidentified	unidentified	unidentified	unidentified
ASV873	33	0	0	0	0	20	0	0	0	0	0	0	10	0	0	63	Fungi{superkingdom}(99);Mortierellomycota{phylum}(99);Mortierellomycetes{class}(99);Mortierellales{order}(99);Mortierellaceae{family}(99);Mortierella{genus}(99);Unassigned{species}(0)	Fungi	Mortierellomycota	Mortierellomycetes	Mortierellales	Mortierellaceae	Mortierella	Unassigned
ASV876	5	0	0	0	0	0	0	0	0	0	0	26	43	10	0	84	Fungi{superkingdom}(97);Glomeromycota{phylum}(97);Glomeromycetes{class}(97);Glomerales{order}(97);Glomeraceae{family}(97);Glomus{genus}(97);unidentified{species}(97)	Fungi	Glomeromycota	Glomeromycetes	Glomerales	Glomeraceae	Glomus	unidentified
ASV878	0	0	0	0	0	23	0	0	0	0	0	0	0	0	0	23	Fungi{superkingdom}(63);Basidiomycota{phylum}(63);Agaricomycetes{class}(63);Unassigned{order}(0);Unassigned{family}(0);Unassigned{genus}(0);Unassigned{species}(0)	Fungi	Basidiomycota	Agaricomycetes	Unassigned	Unassigned	Unassigned	Unassigned
ASV883	0	0	0	20	11	0	0	0	0	101	0	0	0	0	0	132	Fungi{superkingdom}(68);Ascomycota{phylum}(68);Unassigned{class}(0);Unassigned{order}(0);Unassigned{family}(0);Unassigned{genus}(0);Unassigned{species}(0)	Fungi	Ascomycota	Unassigned	Unassigned	Unassigned	Unassigned	Unassigned
ASV889	0	0	0	0	0	0	0	18	0	0	22	0	56	0	0	96	Fungi{superkingdom}(100);Basidiomycota{phylum}(100);Agaricomycetes{class}(100);Agaricales{order}(100);Psathyrellaceae{family}(100);Psathyrella{genus}(100);Unassigned{species}(0)	Fungi	Basidiomycota	Agaricomycetes	Agaricales	Psathyrellaceae	Psathyrella	Unassigned
ASV890	0	0	0	0	0	0	0	56	0	0	0	0	0	0	0	56	Fungi{superkingdom}(81);Basidiomycota{phylum}(81);Agaricomycetes{class}(81);Cantharellales{order}(81);Ceratobasidiaceae{family}(81);unidentified{genus}(81);unidentified{species}(81)	Fungi	Basidiomycota	Agaricomycetes	Cantharellales	Ceratobasidiaceae	unidentified	unidentified
ASV891	16	0	0	0	0	0	0	0	0	0	0	0	0	0	0	16	Fungi{superkingdom}(95);Ascomycota{phylum}(95);Dothideomycetes{class}(95);Pleosporales{order}(95);Unassigned{family}(0);Unassigned{genus}(0);Unassigned{species}(0)	Fungi	Ascomycota	Dothideomycetes	Pleosporales	Unassigned	Unassigned	Unassigned
ASV896	0	0	0	0	0	0	8	0	0	0	0	0	0	0	0	8	Fungi{superkingdom}(100);Unassigned{phylum}(0);Unassigned{class}(0);Unassigned{order}(0);Unassigned{family}(0);Unassigned{genus}(0);Unassigned{species}(0)	Fungi	Unassigned	Unassigned	Unassigned	Unassigned	Unassigned	Unassigned
ASV898	292	0	0	0	11	0	0	0	0	0	0	0	0	0	0	303	Fungi{superkingdom}(62);Basidiomycota{phylum}(62);Agaricomycetes{class}(62);Agaricales{order}(62);Agaricaceae{family}(62);Agaricus{genus}(62);unidentified{species}(62)	Fungi	Basidiomycota	Agaricomycetes	Agaricales	Agaricaceae	Agaricus	unidentified
ASV899	0	0	0	0	0	0	0	0	0	0	26	0	0	14	0	40	Fungi{superkingdom}(100);Ascomycota{phylum}(100);Dothideomycetes{class}(100);Pleosporales{order}(100);Phaeosphaeriaceae{family}(100);Paraphoma{genus}(100);Unassigned{species}(0)	Fungi	Ascomycota	Dothideomycetes	Pleosporales	Phaeosphaeriaceae	Paraphoma	Unassigned
ASV901	0	0	0	0	0	0	0	0	0	152	0	0	0	1058	0	1210	Fungi{superkingdom}(83);unidentified{phylum}(83);unidentified{class}(83);unidentified{order}(83);unidentified{family}(83);unidentified{genus}(83);unidentified{species}(83)	Fungi	unidentified	unidentified	unidentified	unidentified	unidentified	unidentified
ASV902	0	0	0	0	23	0	0	0	0	0	0	0	0	0	0	23	Fungi{superkingdom}(89);Basidiomycota{phylum}(89);Agaricomycetes{class}(89);Agaricales{order}(89);Entolomataceae{family}(89);Entoloma{genus}(89);Entoloma_rusticoides{species}(89)	Fungi	Basidiomycota	Agaricomycetes	Agaricales	Entolomataceae	Entoloma	Entoloma_rusticoides
ASV903	0	0	0	0	0	0	19	13	0	42	0	25	57	0	0	156	Fungi{superkingdom}(100);Unassigned{phylum}(0);Unassigned{class}(0);Unassigned{order}(0);Unassigned{family}(0);Unassigned{genus}(0);Unassigned{species}(0)	Fungi	Unassigned	Unassigned	Unassigned	Unassigned	Unassigned	Unassigned
ASV904	0	32	36	0	0	0	0	0	0	0	59	0	0	0	0	127	Fungi{superkingdom}(100);Unassigned{phylum}(0);Unassigned{class}(0);Unassigned{order}(0);Unassigned{family}(0);Unassigned{genus}(0);Unassigned{species}(0)	Fungi	Unassigned	Unassigned	Unassigned	Unassigned	Unassigned	Unassigned
ASV905	0	0	0	0	0	0	0	0	0	0	0	0	0	0	35	35	Fungi{superkingdom}(94);Ascomycota{phylum}(94);Leotiomycetes{class}(94);Helotiales{order}(94);Helotiales_fam_Incertae_sedis{family}(94);Cadophora{genus}(94);Cadophora_luteo-olivacea{species}(94)	Fungi	Ascomycota	Leotiomycetes	Helotiales	Helotiales_fam_Incertae_sedis	Cadophora	Cadophora_luteo-olivacea
ASV906	0	0	0	0	0	0	0	0	35	0	0	0	0	0	38	73	Fungi{superkingdom}(87);unidentified{phylum}(87);unidentified{class}(87);unidentified{order}(87);unidentified{family}(87);unidentified{genus}(87);unidentified{species}(87)	Fungi	unidentified	unidentified	unidentified	unidentified	unidentified	unidentified
ASV907	4	0	0	0	5	0	0	29	0	0	0	0	0	0	0	38	Fungi{superkingdom}(62);Ascomycota{phylum}(62);Leotiomycetes{class}(62);Thelebolales{order}(62);Pseudeurotiaceae{family}(62);Pseudogymnoascus{genus}(62);unidentified{species}(62)	Fungi	Ascomycota	Leotiomycetes	Thelebolales	Pseudeurotiaceae	Pseudogymnoascus	unidentified
ASV909	0	26	0	0	0	0	0	0	0	0	25	62	0	0	0	113	Fungi{superkingdom}(74);Ascomycota{phylum}(74);Unassigned{class}(0);Unassigned{order}(0);Unassigned{family}(0);Unassigned{genus}(0);Unassigned{species}(0)	Fungi	Ascomycota	Unassigned	Unassigned	Unassigned	Unassigned	Unassigned
ASV912	15	0	0	0	0	34	0	0	0	18	0	37	23	0	0	127	Fungi{superkingdom}(100);Ascomycota{phylum}(100);Sordariomycetes{class}(100);Sordariales{order}(100);Lasiosphaeriaceae{family}(100);Cercophora{genus}(100);Cercophora_mirabilis{species}(100)	Fungi	Ascomycota	Sordariomycetes	Sordariales	Lasiosphaeriaceae	Cercophora	Cercophora_mirabilis
ASV916	0	0	0	0	0	30	0	63	54	0	0	0	0	0	0	147	Fungi{superkingdom}(100);Unassigned{phylum}(0);Unassigned{class}(0);Unassigned{order}(0);Unassigned{family}(0);Unassigned{genus}(0);Unassigned{species}(0)	Fungi	Unassigned	Unassigned	Unassigned	Unassigned	Unassigned	Unassigned
ASV917	0	0	0	0	0	0	0	0	51	0	0	0	0	0	0	51	Fungi{superkingdom}(100);Unassigned{phylum}(0);Unassigned{class}(0);Unassigned{order}(0);Unassigned{family}(0);Unassigned{genus}(0);Unassigned{species}(0)	Fungi	Unassigned	Unassigned	Unassigned	Unassigned	Unassigned	Unassigned
ASV921	0	20	0	0	0	54	0	40	0	0	0	0	0	0	17	131	Fungi{superkingdom}(98);Ascomycota{phylum}(98);Sordariomycetes{class}(98);Hypocreales{order}(98);Nectriaceae{family}(98);Fusarium{genus}(98);Fusarium_neocosmosporiellum{species}(98)	Fungi	Ascomycota	Sordariomycetes	Hypocreales	Nectriaceae	Fusarium	Fusarium_neocosmosporiellum
ASV923	0	0	0	10	0	0	0	0	0	0	0	0	0	0	0	10	Fungi{superkingdom}(70);Basidiomycota{phylum}(70);Agaricomycetes{class}(70);Agaricales{order}(70);Pterulaceae{family}(70);Pterula{genus}(70);Pterula_gracilis{species}(70)	Fungi	Basidiomycota	Agaricomycetes	Agaricales	Pterulaceae	Pterula	Pterula_gracilis
ASV925	0	0	0	0	0	0	0	7	0	0	0	0	0	0	28	35	Fungi{superkingdom}(100);Ascomycota{phylum}(100);Eurotiomycetes{class}(100);Chaetothyriales{order}(100);Trichomeriaceae{family}(100);Knufia{genus}(100);Knufia_tsunedae{species}(100)	Fungi	Ascomycota	Eurotiomycetes	Chaetothyriales	Trichomeriaceae	Knufia	Knufia_tsunedae
ASV930	0	0	0	7	0	0	0	0	0	0	0	143	0	0	0	150	Fungi{superkingdom}(89);Ascomycota{phylum}(89);Sordariomycetes{class}(89);Unassigned{order}(0);Unassigned{family}(0);Unassigned{genus}(0);Unassigned{species}(0)	Fungi	Ascomycota	Sordariomycetes	Unassigned	Unassigned	Unassigned	Unassigned
ASV937	0	0	0	0	0	17	27	0	0	0	0	0	0	0	36	80	Fungi{superkingdom}(67);Basidiomycota{phylum}(67);Agaricomycetes{class}(67);Agaricales{order}(67);Bolbitiaceae{family}(67);Conocybe{genus}(67);Conocybe_velutipes{species}(67)	Fungi	Basidiomycota	Agaricomycetes	Agaricales	Bolbitiaceae	Conocybe	Conocybe_velutipes
ASV941	0	0	0	0	0	0	0	0	0	0	0	0	14	0	0	14	Fungi{superkingdom}(71);Ascomycota{phylum}(71);Unassigned{class}(0);Unassigned{order}(0);Unassigned{family}(0);Unassigned{genus}(0);Unassigned{species}(0)	Fungi	Ascomycota	Unassigned	Unassigned	Unassigned	Unassigned	Unassigned
ASV942	0	0	0	0	0	0	0	0	0	0	840	0	0	0	0	840	Fungi{superkingdom}(98);Basidiomycota{phylum}(98);Agaricomycetes{class}(98);Unassigned{order}(0);Unassigned{family}(0);Unassigned{genus}(0);Unassigned{species}(0)	Fungi	Basidiomycota	Agaricomycetes	Unassigned	Unassigned	Unassigned	Unassigned
ASV947	0	0	0	0	6	0	0	0	0	0	0	0	0	0	0	6	Fungi{superkingdom}(67);unidentified{phylum}(67);unidentified{class}(67);unidentified{order}(67);unidentified{family}(67);unidentified{genus}(67);unidentified{species}(67)	Fungi	unidentified	unidentified	unidentified	unidentified	unidentified	unidentified
ASV948	0	0	0	0	0	35	129	0	0	0	0	0	0	0	0	164	Fungi{superkingdom}(66);Ascomycota{phylum}(66);Sordariomycetes{class}(66);Unassigned{order}(0);Unassigned{family}(0);Unassigned{genus}(0);Unassigned{species}(0)	Fungi	Ascomycota	Sordariomycetes	Unassigned	Unassigned	Unassigned	Unassigned
ASV949	0	0	0	0	0	0	25	0	0	0	0	0	0	0	0	25	Fungi{superkingdom}(86);Basidiomycota{phylum}(86);Agaricomycetes{class}(86);Agaricales{order}(86);unidentified{family}(86);unidentified{genus}(86);unidentified{species}(86)	Fungi	Basidiomycota	Agaricomycetes	Agaricales	unidentified	unidentified	unidentified
ASV952	0	0	0	0	0	0	0	0	0	337	0	0	0	0	0	337	Fungi{superkingdom}(100);Unassigned{phylum}(0);Unassigned{class}(0);Unassigned{order}(0);Unassigned{family}(0);Unassigned{genus}(0);Unassigned{species}(0)	Fungi	Unassigned	Unassigned	Unassigned	Unassigned	Unassigned	Unassigned
ASV953	0	19	0	7	0	21	0	2	0	24	12	0	14	3	14	116	Fungi{superkingdom}(63);Ascomycota{phylum}(63);Sordariomycetes{class}(63);Xylariales{order}(63);unidentified{family}(63);unidentified{genus}(63);unidentified{species}(63)	Fungi	Ascomycota	Sordariomycetes	Xylariales	unidentified	unidentified	unidentified
ASV958	0	0	0	69	0	30	41	0	0	0	0	0	0	8	0	148	Fungi{superkingdom}(94);unidentified{phylum}(94);unidentified{class}(94);unidentified{order}(94);unidentified{family}(94);unidentified{genus}(94);unidentified{species}(94)	Fungi	unidentified	unidentified	unidentified	unidentified	unidentified	unidentified
ASV959	0	0	0	0	22	0	0	0	0	0	0	0	0	0	0	22	Fungi{superkingdom}(62);Ascomycota{phylum}(62);Dothideomycetes{class}(62);Pleosporales{order}(62);Didymellaceae{family}(62);Didymella{genus}(62);Didymella_fabae{species}(62)	Fungi	Ascomycota	Dothideomycetes	Pleosporales	Didymellaceae	Didymella	Didymella_fabae
ASV962	0	0	0	0	0	0	514	0	0	0	0	0	0	0	0	514	Fungi{superkingdom}(100);Unassigned{phylum}(0);Unassigned{class}(0);Unassigned{order}(0);Unassigned{family}(0);Unassigned{genus}(0);Unassigned{species}(0)	Fungi	Unassigned	Unassigned	Unassigned	Unassigned	Unassigned	Unassigned
ASV965	0	0	0	4	0	0	0	0	0	0	0	0	0	0	0	4	Fungi{superkingdom}(69);Basidiomycota{phylum}(69);Agaricomycetes{class}(69);unidentified{order}(69);unidentified{family}(69);unidentified{genus}(69);unidentified{species}(69)	Fungi	Basidiomycota	Agaricomycetes	unidentified	unidentified	unidentified	unidentified
ASV968	0	0	0	0	73	0	0	0	0	0	0	0	0	0	0	73	Fungi{superkingdom}(77);unidentified{phylum}(77);unidentified{class}(77);unidentified{order}(77);unidentified{family}(77);unidentified{genus}(77);unidentified{species}(77)	Fungi	unidentified	unidentified	unidentified	unidentified	unidentified	unidentified
ASV969	0	0	0	0	0	0	0	24	0	0	0	0	0	0	44	68	Fungi{superkingdom}(92);Ascomycota{phylum}(92);Dothideomycetes{class}(92);Pleosporales{order}(92);Phaeosphaeriaceae{family}(92);Chaetosphaeronema{genus}(92);unidentified{species}(92)	Fungi	Ascomycota	Dothideomycetes	Pleosporales	Phaeosphaeriaceae	Chaetosphaeronema	unidentified
ASV970	4	0	0	0	0	0	0	0	0	13	0	0	0	0	0	17	Fungi{superkingdom}(100);Unassigned{phylum}(0);Unassigned{class}(0);Unassigned{order}(0);Unassigned{family}(0);Unassigned{genus}(0);Unassigned{species}(0)	Fungi	Unassigned	Unassigned	Unassigned	Unassigned	Unassigned	Unassigned
ASV971	0	0	0	0	0	38	0	0	0	12	0	0	0	0	0	50	Fungi{superkingdom}(100);Unassigned{phylum}(0);Unassigned{class}(0);Unassigned{order}(0);Unassigned{family}(0);Unassigned{genus}(0);Unassigned{species}(0)	Fungi	Unassigned	Unassigned	Unassigned	Unassigned	Unassigned	Unassigned
ASV975	0	0	0	0	0	0	0	0	0	0	0	0	35	0	0	35	Fungi{superkingdom}(66);Ascomycota{phylum}(66);Unassigned{class}(0);Unassigned{order}(0);Unassigned{family}(0);Unassigned{genus}(0);Unassigned{species}(0)	Fungi	Ascomycota	Unassigned	Unassigned	Unassigned	Unassigned	Unassigned
ASV978	0	0	0	0	0	0	13	0	0	0	0	0	0	0	0	13	Fungi{superkingdom}(86);Glomeromycota{phylum}(86);Glomeromycetes{class}(86);Glomerales{order}(86);Glomeraceae{family}(86);Glomus{genus}(86);Glomus_aggregatum{species}(86)	Fungi	Glomeromycota	Glomeromycetes	Glomerales	Glomeraceae	Glomus	Glomus_aggregatum
ASV979	0	0	0	0	0	0	0	0	0	0	0	19	0	0	0	19	Fungi{superkingdom}(93);Ascomycota{phylum}(93);Sordariomycetes{class}(93);Hypocreales{order}(93);Stachybotryaceae{family}(93);Xenomyrothecium{genus}(93);Xenomyrothecium_tongaense{species}(93)	Fungi	Ascomycota	Sordariomycetes	Hypocreales	Stachybotryaceae	Xenomyrothecium	Xenomyrothecium_tongaense
ASV980	0	0	0	151	29	0	0	0	0	0	0	0	0	0	0	180	Fungi{superkingdom}(100);Ascomycota{phylum}(100);Eurotiomycetes{class}(100);Chaetothyriales{order}(100);Trichomeriaceae{family}(100);Knufia{genus}(100);Knufia_aspidiotus{species}(100)	Fungi	Ascomycota	Eurotiomycetes	Chaetothyriales	Trichomeriaceae	Knufia	Knufia_aspidiotus
ASV983	0	0	0	0	0	0	0	0	0	0	0	0	41	11	0	52	Fungi{superkingdom}(98);unidentified{phylum}(98);unidentified{class}(98);unidentified{order}(98);unidentified{family}(98);unidentified{genus}(98);unidentified{species}(98)	Fungi	unidentified	unidentified	unidentified	unidentified	unidentified	unidentified
ASV988	0	0	0	0	0	0	0	0	0	0	38	34	85	0	0	157	Fungi{superkingdom}(100);Basidiomycota{phylum}(100);Cystobasidiomycetes{class}(100);Erythrobasidiales{order}(100);Erythrobasidiaceae{family}(100);Erythrobasidium{genus}(100);Erythrobasidium_hasegawianum{species}(100)	Fungi	Basidiomycota	Cystobasidiomycetes	Erythrobasidiales	Erythrobasidiaceae	Erythrobasidium	Erythrobasidium_hasegawianum
ASV989	10	22	0	0	0	0	0	0	0	0	0	29	0	0	0	61	Fungi{superkingdom}(62);Ascomycota{phylum}(62);Sordariomycetes{class}(62);Glomerellales{order}(62);Plectosphaerellaceae{family}(62);Lectera{genus}(62);Lectera_longa{species}(62)	Fungi	Ascomycota	Sordariomycetes	Glomerellales	Plectosphaerellaceae	Lectera	Lectera_longa
ASV991	9	98	0	0	0	0	0	40	0	0	0	0	0	0	0	147	Fungi{superkingdom}(100);Ascomycota{phylum}(100);Leotiomycetes{class}(100);Helotiales{order}(100);Helotiaceae{family}(100);Tetracladium{genus}(100);Tetracladium_furcatum{species}(100)	Fungi	Ascomycota	Leotiomycetes	Helotiales	Helotiaceae	Tetracladium	Tetracladium_furcatum
ASV993	0	0	0	0	0	56	0	0	0	0	0	0	0	0	0	56	Fungi{superkingdom}(84);Basidiomycota{phylum}(84);Agaricomycetes{class}(84);Cantharellales{order}(84);Ceratobasidiaceae{family}(84);unidentified{genus}(84);unidentified{species}(84)	Fungi	Basidiomycota	Agaricomycetes	Cantharellales	Ceratobasidiaceae	unidentified	unidentified
ASV995	0	0	0	7	0	0	0	0	0	0	0	148	0	0	0	155	Fungi{superkingdom}(93);Ascomycota{phylum}(93);Sordariomycetes{class}(93);Sordariales{order}(93);Lasiosphaeriaceae{family}(93);Schizothecium{genus}(93);Schizothecium_inaequale{species}(93)	Fungi	Ascomycota	Sordariomycetes	Sordariales	Lasiosphaeriaceae	Schizothecium	Schizothecium_inaequale
ASV999	0	43	0	0	0	0	0	0	0	0	0	0	0	0	0	43	Fungi{superkingdom}(81);Ascomycota{phylum}(81);Dothideomycetes{class}(81);Pleosporales{order}(81);Unassigned{family}(0);Unassigned{genus}(0);Unassigned{species}(0)	Fungi	Ascomycota	Dothideomycetes	Pleosporales	Unassigned	Unassigned	Unassigned
ASV1001	0	0	0	0	0	0	33	0	0	0	0	0	0	0	0	33	Fungi{superkingdom}(61);Ascomycota{phylum}(61);unidentified{class}(61);unidentified{order}(61);unidentified{family}(61);unidentified{genus}(61);unidentified{species}(61)	Fungi	Ascomycota	unidentified	unidentified	unidentified	unidentified	unidentified
ASV1004	18	0	0	0	0	26	0	0	0	0	0	0	0	0	0	44	Fungi{superkingdom}(100);Chytridiomycota{phylum}(100);Spizellomycetes{class}(100);Spizellomycetales{order}(100);Spizellomycetaceae{family}(100);Gaertneriomyces{genus}(100);unidentified{species}(100)	Fungi	Chytridiomycota	Spizellomycetes	Spizellomycetales	Spizellomycetaceae	Gaertneriomyces	unidentified
ASV1005	0	0	0	0	0	0	0	0	32	0	0	72	0	0	0	104	Fungi{superkingdom}(99);Basidiomycota{phylum}(99);Agaricomycetes{class}(99);Cantharellales{order}(99);Ceratobasidiaceae{family}(99);Unassigned{genus}(0);Unassigned{species}(0)	Fungi	Basidiomycota	Agaricomycetes	Cantharellales	Ceratobasidiaceae	Unassigned	Unassigned
ASV1010	0	0	0	0	0	0	0	31	0	0	0	0	27	0	0	58	Fungi{superkingdom}(69);Basidiomycota{phylum}(69);Tremellomycetes{class}(69);Tremellales{order}(69);Rhynchogastremataceae{family}(69);Papiliotrema{genus}(69);Papiliotrema_laurentii{species}(69)	Fungi	Basidiomycota	Tremellomycetes	Tremellales	Rhynchogastremataceae	Papiliotrema	Papiliotrema_laurentii
ASV1013	0	0	0	0	0	35	11	0	0	0	0	0	0	0	15	61	Fungi{superkingdom}(94);unidentified{phylum}(94);unidentified{class}(94);unidentified{order}(94);unidentified{family}(94);unidentified{genus}(94);unidentified{species}(94)	Fungi	unidentified	unidentified	unidentified	unidentified	unidentified	unidentified
ASV1014	0	0	0	37	16	0	0	0	0	0	0	0	0	0	0	53	Fungi{superkingdom}(89);Basidiomycota{phylum}(89);Unassigned{class}(0);Unassigned{order}(0);Unassigned{family}(0);Unassigned{genus}(0);Unassigned{species}(0)	Fungi	Basidiomycota	Unassigned	Unassigned	Unassigned	Unassigned	Unassigned
ASV1015	0	0	0	2	0	0	0	0	0	58	0	72	0	0	0	132	Fungi{superkingdom}(100);Ascomycota{phylum}(100);Eurotiomycetes{class}(100);Eurotiales{order}(100);Aspergillaceae{family}(100);Aspergillus{genus}(100);Aspergillus_bicolor{species}(100)	Fungi	Ascomycota	Eurotiomycetes	Eurotiales	Aspergillaceae	Aspergillus	Aspergillus_bicolor
ASV1016	0	0	0	0	0	0	0	0	0	0	0	259	0	0	0	259	Fungi{superkingdom}(75);Chytridiomycota{phylum}(75);unidentified{class}(75);unidentified{order}(75);unidentified{family}(75);unidentified{genus}(75);unidentified{species}(75)	Fungi	Chytridiomycota	unidentified	unidentified	unidentified	unidentified	unidentified
ASV1022	0	0	0	0	0	0	0	0	0	0	0	68	0	0	0	68	Fungi{superkingdom}(75);Basidiomycota{phylum}(75);Agaricomycetes{class}(75);Agaricales{order}(75);unidentified{family}(75);unidentified{genus}(75);unidentified{species}(75)	Fungi	Basidiomycota	Agaricomycetes	Agaricales	unidentified	unidentified	unidentified
ASV1026	0	0	544	0	0	0	0	0	0	0	0	0	0	0	0	544	Fungi{superkingdom}(62);unidentified{phylum}(62);unidentified{class}(62);unidentified{order}(62);unidentified{family}(62);unidentified{genus}(62);unidentified{species}(62)	Fungi	unidentified	unidentified	unidentified	unidentified	unidentified	unidentified
ASV1029	0	0	0	0	0	0	0	0	50	75	0	0	0	0	0	125	Fungi{superkingdom}(100);Ascomycota{phylum}(100);Dothideomycetes{class}(100);Pleosporales{order}(100);Didymosphaeriaceae{family}(100);Paraconiothyrium{genus}(100);Paraconiothyrium_africanum{species}(100)	Fungi	Ascomycota	Dothideomycetes	Pleosporales	Didymosphaeriaceae	Paraconiothyrium	Paraconiothyrium_africanum
ASV1032	5	0	0	0	0	29	0	27	0	0	0	31	0	0	0	92	Fungi{superkingdom}(100);Unassigned{phylum}(0);Unassigned{class}(0);Unassigned{order}(0);Unassigned{family}(0);Unassigned{genus}(0);Unassigned{species}(0)	Fungi	Unassigned	Unassigned	Unassigned	Unassigned	Unassigned	Unassigned
ASV1034	0	0	0	0	0	0	0	23	0	0	0	0	0	0	0	23	Fungi{superkingdom}(96);Ascomycota{phylum}(96);Sordariomycetes{class}(96);Sordariales{order}(96);Chaetomiaceae{family}(96);Unassigned{genus}(0);Unassigned{species}(0)	Fungi	Ascomycota	Sordariomycetes	Sordariales	Chaetomiaceae	Unassigned	Unassigned
ASV1036	0	0	0	0	0	0	0	0	0	0	0	0	38	0	0	38	Fungi{superkingdom}(72);Basidiomycota{phylum}(72);Agaricomycetes{class}(72);Unassigned{order}(0);Unassigned{family}(0);Unassigned{genus}(0);Unassigned{species}(0)	Fungi	Basidiomycota	Agaricomycetes	Unassigned	Unassigned	Unassigned	Unassigned
ASV1039	0	0	0	0	157	30	0	0	0	0	0	0	0	0	0	187	Fungi{superkingdom}(100);Unassigned{phylum}(0);Unassigned{class}(0);Unassigned{order}(0);Unassigned{family}(0);Unassigned{genus}(0);Unassigned{species}(0)	Fungi	Unassigned	Unassigned	Unassigned	Unassigned	Unassigned	Unassigned
ASV1040	0	0	0	0	10	51	21	127	136	0	0	0	0	0	0	345	Fungi{superkingdom}(96);unidentified{phylum}(96);unidentified{class}(96);unidentified{order}(96);unidentified{family}(96);unidentified{genus}(96);unidentified{species}(96)	Fungi	unidentified	unidentified	unidentified	unidentified	unidentified	unidentified
ASV1041	0	0	0	0	0	17	0	0	0	3	0	0	0	0	0	20	Fungi{superkingdom}(65);Ascomycota{phylum}(65);Eurotiomycetes{class}(65);Chaetothyriales{order}(65);Trichomeriaceae{family}(65);Bradymyces{genus}(65);unidentified{species}(65)	Fungi	Ascomycota	Eurotiomycetes	Chaetothyriales	Trichomeriaceae	Bradymyces	unidentified
ASV1044	0	0	0	0	0	0	0	0	0	0	0	0	0	0	17	17	Fungi{superkingdom}(100);Ascomycota{phylum}(100);Pezizomycetes{class}(100);Pezizales{order}(100);Pezizaceae{family}(100);Mattirolomyces{genus}(100);Mattirolomyces_terfezioides{species}(100)	Fungi	Ascomycota	Pezizomycetes	Pezizales	Pezizaceae	Mattirolomyces	Mattirolomyces_terfezioides
ASV1046	0	0	0	0	0	0	9	0	0	0	0	0	0	0	0	9	Fungi{superkingdom}(63);Basidiomycota{phylum}(63);Unassigned{class}(0);Unassigned{order}(0);Unassigned{family}(0);Unassigned{genus}(0);Unassigned{species}(0)	Fungi	Basidiomycota	Unassigned	Unassigned	Unassigned	Unassigned	Unassigned
ASV1048	0	0	0	0	6	0	0	0	0	20	0	0	0	0	0	26	Fungi{superkingdom}(81);Ascomycota{phylum}(81);Sordariomycetes{class}(81);Sordariales{order}(81);Chaetomiaceae{family}(81);Unassigned{genus}(0);Unassigned{species}(0)	Fungi	Ascomycota	Sordariomycetes	Sordariales	Chaetomiaceae	Unassigned	Unassigned
ASV1051	0	0	0	0	0	55	15	195	0	8	0	0	0	0	0	273	Fungi{superkingdom}(97);unidentified{phylum}(97);unidentified{class}(97);unidentified{order}(97);unidentified{family}(97);unidentified{genus}(97);unidentified{species}(97)	Fungi	unidentified	unidentified	unidentified	unidentified	unidentified	unidentified
ASV1053	0	42	0	0	0	0	0	0	0	0	0	0	0	0	0	42	Fungi{superkingdom}(93);Ascomycota{phylum}(93);Eurotiomycetes{class}(93);Chaetothyriales{order}(93);Herpotrichiellaceae{family}(93);Veronaea{genus}(93);Unassigned{species}(0)	Fungi	Ascomycota	Eurotiomycetes	Chaetothyriales	Herpotrichiellaceae	Veronaea	Unassigned
ASV1054	0	0	0	0	0	0	0	27	0	0	0	104	0	0	0	131	Fungi{superkingdom}(98);Ascomycota{phylum}(98);Pezizomycetes{class}(98);Pezizales{order}(98);Pezizaceae{family}(98);Iodophanus{genus}(98);Unassigned{species}(0)	Fungi	Ascomycota	Pezizomycetes	Pezizales	Pezizaceae	Iodophanus	Unassigned
ASV1055	0	0	0	28	0	0	0	0	0	0	0	0	0	0	29	57	Fungi{superkingdom}(100);Unassigned{phylum}(0);Unassigned{class}(0);Unassigned{order}(0);Unassigned{family}(0);Unassigned{genus}(0);Unassigned{species}(0)	Fungi	Unassigned	Unassigned	Unassigned	Unassigned	Unassigned	Unassigned
ASV1059	0	45	0	0	0	0	0	0	0	0	0	0	0	0	0	45	Fungi{superkingdom}(82);unidentified{phylum}(82);unidentified{class}(82);unidentified{order}(82);unidentified{family}(82);unidentified{genus}(82);unidentified{species}(82)	Fungi	unidentified	unidentified	unidentified	unidentified	unidentified	unidentified
ASV1072	0	0	0	17	0	0	0	0	0	0	0	0	0	0	0	17	Fungi{superkingdom}(100);Unassigned{phylum}(0);Unassigned{class}(0);Unassigned{order}(0);Unassigned{family}(0);Unassigned{genus}(0);Unassigned{species}(0)	Fungi	Unassigned	Unassigned	Unassigned	Unassigned	Unassigned	Unassigned
ASV1074	0	0	0	0	0	0	0	0	16	0	13	0	0	9	0	38	Fungi{superkingdom}(81);Basidiomycota{phylum}(81);Tremellomycetes{class}(81);Filobasidiales{order}(81);Filobasidiaceae{family}(81);Naganishia{genus}(81);Naganishia_diffluens{species}(81)	Fungi	Basidiomycota	Tremellomycetes	Filobasidiales	Filobasidiaceae	Naganishia	Naganishia_diffluens
ASV1075	0	70	0	37	0	0	0	0	0	0	0	0	0	0	0	107	Fungi{superkingdom}(99);Ascomycota{phylum}(99);Leotiomycetes{class}(99);Helotiales{order}(99);Helotiaceae{family}(99);Articulospora{genus}(99);unidentified{species}(99)	Fungi	Ascomycota	Leotiomycetes	Helotiales	Helotiaceae	Articulospora	unidentified
ASV1077	0	37	0	0	0	0	0	0	0	0	8	0	0	0	0	45	Fungi{superkingdom}(99);Basidiomycota{phylum}(99);Agaricomycetes{class}(99);Agaricales{order}(99);Strophariaceae{family}(99);Leratiomyces{genus}(99);unidentified{species}(99)	Fungi	Basidiomycota	Agaricomycetes	Agaricales	Strophariaceae	Leratiomyces	unidentified
ASV1079	0	0	0	0	0	0	0	0	18	0	0	16	0	0	0	34	Fungi{superkingdom}(97);Ascomycota{phylum}(97);Dothideomycetes{class}(97);Capnodiales{order}(97);Mycosphaerellaceae{family}(97);Mycosphaerella{genus}(97);Mycosphaerella_tassiana{species}(97)	Fungi	Ascomycota	Dothideomycetes	Capnodiales	Mycosphaerellaceae	Mycosphaerella	Mycosphaerella_tassiana
ASV1083	0	69	0	0	0	0	0	0	0	0	0	0	0	4	0	73	Fungi{superkingdom}(81);unidentified{phylum}(81);unidentified{class}(81);unidentified{order}(81);unidentified{family}(81);unidentified{genus}(81);unidentified{species}(81)	Fungi	unidentified	unidentified	unidentified	unidentified	unidentified	unidentified
ASV1084	0	0	0	0	0	0	0	0	11	0	0	0	0	0	0	11	Fungi{superkingdom}(100);Basidiomycota{phylum}(100);Agaricomycetes{class}(100);Boletales{order}(100);Coniophoraceae{family}(100);Coniophora{genus}(100);unidentified{species}(100)	Fungi	Basidiomycota	Agaricomycetes	Boletales	Coniophoraceae	Coniophora	unidentified
ASV1087	0	0	0	0	0	0	0	0	0	0	0	0	0	904	0	904	Fungi{superkingdom}(69);Basidiomycota{phylum}(69);Agaricomycetes{class}(69);Agaricales{order}(69);unidentified{family}(69);unidentified{genus}(69);unidentified{species}(69)	Fungi	Basidiomycota	Agaricomycetes	Agaricales	unidentified	unidentified	unidentified
ASV1088	409	0	0	0	0	0	0	0	0	0	0	0	0	0	0	409	Fungi{superkingdom}(81);unidentified{phylum}(81);unidentified{class}(81);unidentified{order}(81);unidentified{family}(81);unidentified{genus}(81);unidentified{species}(81)	Fungi	unidentified	unidentified	unidentified	unidentified	unidentified	unidentified
ASV1089	0	0	0	0	0	0	0	0	0	0	0	0	0	23	0	23	Fungi{superkingdom}(97);Ascomycota{phylum}(97);Dothideomycetes{class}(97);Pleosporales{order}(97);Pleosporaceae{family}(97);Alternaria{genus}(97);Alternaria_hungarica{species}(97)	Fungi	Ascomycota	Dothideomycetes	Pleosporales	Pleosporaceae	Alternaria	Alternaria_hungarica
ASV1090	0	0	0	0	0	0	0	0	0	0	0	0	0	202	0	202	Fungi{superkingdom}(77);Ascomycota{phylum}(77);Dothideomycetes{class}(77);Pleosporales{order}(77);Melanommataceae{family}(77);Herpotrichia{genus}(77);Herpotrichia_striatispora{species}(77)	Fungi	Ascomycota	Dothideomycetes	Pleosporales	Melanommataceae	Herpotrichia	Herpotrichia_striatispora
ASV1093	0	0	0	0	0	61	0	44	0	0	0	0	0	0	30	135	Fungi{superkingdom}(69);Ascomycota{phylum}(69);Sordariomycetes{class}(69);Hypocreales{order}(69);Hypocreales_fam_Incertae_sedis{family}(69);Acremonium{genus}(69);Acremonium_exuviarum{species}(69)	Fungi	Ascomycota	Sordariomycetes	Hypocreales	Hypocreales_fam_Incertae_sedis	Acremonium	Acremonium_exuviarum
ASV1094	0	0	0	0	0	0	0	0	0	0	0	0	24	0	0	24	Fungi{superkingdom}(96);unidentified{phylum}(96);unidentified{class}(96);unidentified{order}(96);unidentified{family}(96);unidentified{genus}(96);unidentified{species}(96)	Fungi	unidentified	unidentified	unidentified	unidentified	unidentified	unidentified
ASV1099	0	0	0	0	3	0	0	0	0	0	16	27	0	0	0	46	Fungi{superkingdom}(61);Ascomycota{phylum}(61);Unassigned{class}(0);Unassigned{order}(0);Unassigned{family}(0);Unassigned{genus}(0);Unassigned{species}(0)	Fungi	Ascomycota	Unassigned	Unassigned	Unassigned	Unassigned	Unassigned
ASV1101	0	0	0	0	0	0	0	0	0	0	0	0	0	0	42	42	Fungi{superkingdom}(99);Basidiomycota{phylum}(99);Agaricomycetes{class}(99);Cantharellales{order}(99);Ceratobasidiaceae{family}(99);Thanatephorus{genus}(99);Thanatephorus_cucumeris{species}(99)	Fungi	Basidiomycota	Agaricomycetes	Cantharellales	Ceratobasidiaceae	Thanatephorus	Thanatephorus_cucumeris
ASV1104	0	802	0	0	0	0	0	0	0	0	0	0	0	0	0	802	Fungi{superkingdom}(100);Ascomycota{phylum}(100);Pezizomycetes{class}(100);Pezizales{order}(100);Pezizaceae{family}(100);Eremiomyces{genus}(100);Eremiomyces_echinulatus{species}(100)	Fungi	Ascomycota	Pezizomycetes	Pezizales	Pezizaceae	Eremiomyces	Eremiomyces_echinulatus
ASV1105	0	0	0	0	0	119	0	0	0	0	0	0	0	0	0	119	Fungi{superkingdom}(100);Ascomycota{phylum}(100);Dothideomycetes{class}(100);Pleosporales{order}(100);Phaeosphaeriaceae{family}(100);Paraphoma{genus}(100);Paraphoma_radicina{species}(100)	Fungi	Ascomycota	Dothideomycetes	Pleosporales	Phaeosphaeriaceae	Paraphoma	Paraphoma_radicina
ASV1106	0	0	0	0	6	0	0	0	0	0	0	0	0	0	0	6	Fungi{superkingdom}(100);Ascomycota{phylum}(100);Dothideomycetes{class}(100);Pleosporales{order}(100);Phaeosphaeriaceae{family}(100);Neosetophoma{genus}(100);Neosetophoma_samararum{species}(100)	Fungi	Ascomycota	Dothideomycetes	Pleosporales	Phaeosphaeriaceae	Neosetophoma	Neosetophoma_samararum
ASV1107	0	0	22	0	0	28	0	0	0	0	15	0	0	0	0	65	Fungi{superkingdom}(69);Basidiomycota{phylum}(69);Geminibasidiomycetes{class}(69);Geminibasidiales{order}(69);Geminibasidiaceae{family}(69);Geminibasidium{genus}(69);Geminibasidium_hirsutum{species}(69)	Fungi	Basidiomycota	Geminibasidiomycetes	Geminibasidiales	Geminibasidiaceae	Geminibasidium	Geminibasidium_hirsutum
ASV1111	0	52	0	0	0	0	0	0	0	0	0	0	0	0	0	52	Fungi{superkingdom}(100);Unassigned{phylum}(0);Unassigned{class}(0);Unassigned{order}(0);Unassigned{family}(0);Unassigned{genus}(0);Unassigned{species}(0)	Fungi	Unassigned	Unassigned	Unassigned	Unassigned	Unassigned	Unassigned
ASV1115	0	0	0	70	0	0	0	0	0	0	0	0	0	0	0	70	Fungi{superkingdom}(76);Ascomycota{phylum}(76);Eurotiomycetes{class}(76);Eurotiales{order}(76);Trichocomaceae{family}(76);Talaromyces{genus}(76);Unassigned{species}(0)	Fungi	Ascomycota	Eurotiomycetes	Eurotiales	Trichocomaceae	Talaromyces	Unassigned
ASV1119	0	0	0	7	0	0	0	0	0	0	0	0	45	0	0	52	Fungi{superkingdom}(97);unidentified{phylum}(97);unidentified{class}(97);unidentified{order}(97);unidentified{family}(97);unidentified{genus}(97);unidentified{species}(97)	Fungi	unidentified	unidentified	unidentified	unidentified	unidentified	unidentified
ASV1120	0	0	0	0	0	0	0	0	0	0	0	0	0	20	0	20	Fungi{superkingdom}(100);Unassigned{phylum}(0);Unassigned{class}(0);Unassigned{order}(0);Unassigned{family}(0);Unassigned{genus}(0);Unassigned{species}(0)	Fungi	Unassigned	Unassigned	Unassigned	Unassigned	Unassigned	Unassigned
ASV1123	0	0	0	0	0	108	0	0	0	0	0	0	0	0	0	108	Fungi{superkingdom}(75);unidentified{phylum}(75);unidentified{class}(75);unidentified{order}(75);unidentified{family}(75);unidentified{genus}(75);unidentified{species}(75)	Fungi	unidentified	unidentified	unidentified	unidentified	unidentified	unidentified
ASV1125	0	0	16	0	5	0	0	0	0	0	0	0	0	0	0	21	Fungi{superkingdom}(74);Ascomycota{phylum}(74);Sordariomycetes{class}(74);Hypocreales{order}(74);Cordycipitaceae{family}(74);Simplicillium{genus}(74);Simplicillium_minatense{species}(74)	Fungi	Ascomycota	Sordariomycetes	Hypocreales	Cordycipitaceae	Simplicillium	Simplicillium_minatense
ASV1131	0	0	0	0	0	0	0	0	0	0	0	19	0	0	0	19	Fungi{superkingdom}(82);unidentified{phylum}(82);unidentified{class}(82);unidentified{order}(82);unidentified{family}(82);unidentified{genus}(82);unidentified{species}(82)	Fungi	unidentified	unidentified	unidentified	unidentified	unidentified	unidentified
ASV1132	0	0	0	54	0	0	0	0	0	0	0	0	0	0	0	54	Fungi{superkingdom}(99);Ascomycota{phylum}(99);Eurotiomycetes{class}(99);Chaetothyriales{order}(99);Trichomeriaceae{family}(99);Knufia{genus}(99);Unassigned{species}(0)	Fungi	Ascomycota	Eurotiomycetes	Chaetothyriales	Trichomeriaceae	Knufia	Unassigned
ASV1135	4	0	0	0	0	0	0	0	0	0	0	0	0	0	0	4	Fungi{superkingdom}(88);unidentified{phylum}(88);unidentified{class}(88);unidentified{order}(88);unidentified{family}(88);unidentified{genus}(88);unidentified{species}(88)	Fungi	unidentified	unidentified	unidentified	unidentified	unidentified	unidentified
ASV1136	0	0	24	0	0	0	0	0	0	0	0	0	0	0	0	24	Fungi{superkingdom}(88);Ascomycota{phylum}(88);Eurotiomycetes{class}(88);Eurotiales{order}(88);Aspergillaceae{family}(88);Aspergillus{genus}(88);Aspergillus_flavus{species}(88)	Fungi	Ascomycota	Eurotiomycetes	Eurotiales	Aspergillaceae	Aspergillus	Aspergillus_flavus
ASV1139	0	0	0	0	0	0	0	23	0	0	0	0	0	0	0	23	Fungi{superkingdom}(95);Kickxellomycota{phylum}(95);Kickxellomycetes{class}(95);Kickxellales{order}(95);Kickxellaceae{family}(95);Ramicandelaber{genus}(95);unidentified{species}(95)	Fungi	Kickxellomycota	Kickxellomycetes	Kickxellales	Kickxellaceae	Ramicandelaber	unidentified
ASV1140	29	0	0	42	0	0	0	0	0	26	0	0	0	0	0	97	Fungi{superkingdom}(89);unidentified{phylum}(89);unidentified{class}(89);unidentified{order}(89);unidentified{family}(89);unidentified{genus}(89);unidentified{species}(89)	Fungi	unidentified	unidentified	unidentified	unidentified	unidentified	unidentified
ASV1141	0	0	0	0	0	0	11	0	0	0	0	0	5	0	0	16	Fungi{superkingdom}(100);Unassigned{phylum}(0);Unassigned{class}(0);Unassigned{order}(0);Unassigned{family}(0);Unassigned{genus}(0);Unassigned{species}(0)	Fungi	Unassigned	Unassigned	Unassigned	Unassigned	Unassigned	Unassigned
ASV1142	0	0	0	0	0	0	0	0	0	0	0	0	11	0	0	11	Fungi{superkingdom}(95);unidentified{phylum}(95);unidentified{class}(95);unidentified{order}(95);unidentified{family}(95);unidentified{genus}(95);unidentified{species}(95)	Fungi	unidentified	unidentified	unidentified	unidentified	unidentified	unidentified
ASV1144	0	48	0	0	0	0	0	0	31	0	0	0	0	0	0	79	Fungi{superkingdom}(93);Basidiomycota{phylum}(93);Agaricomycetes{class}(93);Agaricales{order}(93);Entolomataceae{family}(93);Entoloma{genus}(93);Entoloma_rusticoides{species}(93)	Fungi	Basidiomycota	Agaricomycetes	Agaricales	Entolomataceae	Entoloma	Entoloma_rusticoides
ASV1148	0	0	0	0	0	0	2	0	0	0	0	0	0	0	0	2	Fungi{superkingdom}(73);Ascomycota{phylum}(73);Dothideomycetes{class}(73);Dothideales{order}(73);Dothideaceae{family}(73);Dothidea{genus}(73);Dothidea_berberidis{species}(73)	Fungi	Ascomycota	Dothideomycetes	Dothideales	Dothideaceae	Dothidea	Dothidea_berberidis
ASV1149	0	0	0	0	0	0	0	0	0	0	0	75	0	0	0	75	Fungi{superkingdom}(100);Ascomycota{phylum}(100);Pezizomycetes{class}(100);Pezizales{order}(100);Pezizaceae{family}(100);Mattirolomyces{genus}(100);Mattirolomyces_spinosus{species}(100)	Fungi	Ascomycota	Pezizomycetes	Pezizales	Pezizaceae	Mattirolomyces	Mattirolomyces_spinosus
ASV1153	0	0	0	0	0	43	0	11	0	0	0	0	0	0	0	54	Fungi{superkingdom}(61);unidentified{phylum}(61);unidentified{class}(61);unidentified{order}(61);unidentified{family}(61);unidentified{genus}(61);unidentified{species}(61)	Fungi	unidentified	unidentified	unidentified	unidentified	unidentified	unidentified
ASV1154	10	0	0	0	0	15	0	0	0	0	0	0	0	0	0	25	Fungi{superkingdom}(90);Ascomycota{phylum}(90);Dothideomycetes{class}(90);Capnodiales{order}(90);Cladosporiaceae{family}(90);Cladosporium{genus}(90);Cladosporium_sphaerospermum{species}(90)	Fungi	Ascomycota	Dothideomycetes	Capnodiales	Cladosporiaceae	Cladosporium	Cladosporium_sphaerospermum
ASV1159	11	18	0	0	0	0	7	0	0	0	0	0	0	0	24	60	Fungi{superkingdom}(74);Basidiomycota{phylum}(74);Agaricomycetes{class}(74);unidentified{order}(74);unidentified{family}(74);unidentified{genus}(74);unidentified{species}(74)	Fungi	Basidiomycota	Agaricomycetes	unidentified	unidentified	unidentified	unidentified
ASV1161	0	0	0	0	0	0	0	0	0	0	0	38	0	0	0	38	Fungi{superkingdom}(62);Ascomycota{phylum}(62);Dothideomycetes{class}(62);Pleosporales{order}(62);Phaeosphaeriaceae{family}(62);Paraphoma{genus}(62);Paraphoma_chrysanthemicola{species}(62)	Fungi	Ascomycota	Dothideomycetes	Pleosporales	Phaeosphaeriaceae	Paraphoma	Paraphoma_chrysanthemicola
ASV1164	0	0	0	0	8	0	0	0	0	0	0	0	52	0	0	60	Fungi{superkingdom}(100);Basidiomycota{phylum}(100);Tremellomycetes{class}(100);Tremellales{order}(100);Bulleribasidiaceae{family}(100);Vishniacozyma{genus}(100);Vishniacozyma_carnescens{species}(100)	Fungi	Basidiomycota	Tremellomycetes	Tremellales	Bulleribasidiaceae	Vishniacozyma	Vishniacozyma_carnescens
ASV1168	0	151	0	0	0	0	0	0	0	0	0	0	0	0	0	151	Fungi{superkingdom}(97);Ascomycota{phylum}(97);Sordariomycetes{class}(97);Sordariales{order}(97);Chaetomiaceae{family}(97);Acrophialophora{genus}(97);unidentified{species}(97)	Fungi	Ascomycota	Sordariomycetes	Sordariales	Chaetomiaceae	Acrophialophora	unidentified
ASV1169	0	0	0	0	0	0	0	0	0	0	0	0	0	0	33	33	Fungi{superkingdom}(100);Ascomycota{phylum}(100);Dothideomycetes{class}(100);Pleosporales{order}(100);Sporormiaceae{family}(100);Sporormiella{genus}(100);Sporormiella_similis{species}(100)	Fungi	Ascomycota	Dothideomycetes	Pleosporales	Sporormiaceae	Sporormiella	Sporormiella_similis
ASV1171	0	0	0	0	0	0	0	0	0	0	0	0	0	32	0	32	Fungi{superkingdom}(74);unidentified{phylum}(74);unidentified{class}(74);unidentified{order}(74);unidentified{family}(74);unidentified{genus}(74);unidentified{species}(74)	Fungi	unidentified	unidentified	unidentified	unidentified	unidentified	unidentified
ASV1172	0	0	0	0	0	0	0	0	0	0	0	0	0	0	175	175	Fungi{superkingdom}(73);Ascomycota{phylum}(73);Sordariomycetes{class}(73);Hypocreales{order}(73);Clavicipitaceae{family}(73);Metarhizium{genus}(73);Metarhizium_anisopliae{species}(73)	Fungi	Ascomycota	Sordariomycetes	Hypocreales	Clavicipitaceae	Metarhizium	Metarhizium_anisopliae
ASV1173	0	0	0	0	4	0	0	0	0	0	0	0	0	0	0	4	Fungi{superkingdom}(73);Ascomycota{phylum}(73);Orbiliomycetes{class}(73);Orbiliales{order}(73);Orbiliaceae{family}(73);unidentified{genus}(73);unidentified{species}(73)	Fungi	Ascomycota	Orbiliomycetes	Orbiliales	Orbiliaceae	unidentified	unidentified
ASV1174	0	0	0	0	0	0	0	0	0	0	0	0	0	758	0	758	Fungi{superkingdom}(100);Unassigned{phylum}(0);Unassigned{class}(0);Unassigned{order}(0);Unassigned{family}(0);Unassigned{genus}(0);Unassigned{species}(0)	Fungi	Unassigned	Unassigned	Unassigned	Unassigned	Unassigned	Unassigned
ASV1178	0	0	0	0	0	0	0	0	0	16	0	0	0	0	0	16	Fungi{superkingdom}(63);Ascomycota{phylum}(63);Unassigned{class}(0);Unassigned{order}(0);Unassigned{family}(0);Unassigned{genus}(0);Unassigned{species}(0)	Fungi	Ascomycota	Unassigned	Unassigned	Unassigned	Unassigned	Unassigned
ASV1180	0	0	0	0	0	0	15	0	0	0	0	0	0	0	0	15	Fungi{superkingdom}(99);unidentified{phylum}(99);unidentified{class}(99);unidentified{order}(99);unidentified{family}(99);unidentified{genus}(99);unidentified{species}(99)	Fungi	unidentified	unidentified	unidentified	unidentified	unidentified	unidentified
ASV1181	0	0	42	0	0	0	0	15	25	0	0	0	0	0	70	152	Fungi{superkingdom}(99);Basidiomycota{phylum}(99);Agaricomycetes{class}(99);Agaricales{order}(99);Entolomataceae{family}(99);Clitopilus{genus}(99);unidentified{species}(99)	Fungi	Basidiomycota	Agaricomycetes	Agaricales	Entolomataceae	Clitopilus	unidentified
ASV1184	9	0	0	0	0	0	0	0	0	0	0	0	0	0	0	9	Fungi{superkingdom}(100);Unassigned{phylum}(0);Unassigned{class}(0);Unassigned{order}(0);Unassigned{family}(0);Unassigned{genus}(0);Unassigned{species}(0)	Fungi	Unassigned	Unassigned	Unassigned	Unassigned	Unassigned	Unassigned
ASV1193	0	0	0	7	0	0	0	0	0	0	0	0	0	0	0	7	Fungi{superkingdom}(93);Ascomycota{phylum}(93);Dothideomycetes{class}(93);Pleosporales{order}(93);Lophiostomataceae{family}(93);Lophiostoma{genus}(93);Lophiostoma_rosae{species}(93)	Fungi	Ascomycota	Dothideomycetes	Pleosporales	Lophiostomataceae	Lophiostoma	Lophiostoma_rosae
ASV1194	0	0	0	0	0	0	0	0	0	0	86	0	0	0	0	86	Fungi{superkingdom}(63);Basidiomycota{phylum}(63);Agaricomycetes{class}(63);Unassigned{order}(0);Unassigned{family}(0);Unassigned{genus}(0);Unassigned{species}(0)	Fungi	Basidiomycota	Agaricomycetes	Unassigned	Unassigned	Unassigned	Unassigned
ASV1196	0	0	0	0	7	0	0	0	0	0	0	0	0	0	0	7	Fungi{superkingdom}(94);Basidiomycota{phylum}(94);Agaricomycetes{class}(94);Sebacinales{order}(94);Sebacinaceae{family}(94);Efibulobasidium{genus}(94);Efibulobasidium_albescens{species}(94)	Fungi	Basidiomycota	Agaricomycetes	Sebacinales	Sebacinaceae	Efibulobasidium	Efibulobasidium_albescens
ASV1200	0	0	0	0	0	0	0	0	0	0	0	0	0	104	0	104	Fungi{superkingdom}(81);Ascomycota{phylum}(81);Dothideomycetes{class}(81);Capnodiales{order}(81);Mycosphaerellaceae{family}(81);Mycocentrospora{genus}(81);Mycocentrospora_acerina{species}(81)	Fungi	Ascomycota	Dothideomycetes	Capnodiales	Mycosphaerellaceae	Mycocentrospora	Mycocentrospora_acerina
ASV1202	0	0	0	0	0	0	0	11	0	0	0	0	0	0	0	11	Fungi{superkingdom}(66);Ascomycota{phylum}(66);Eurotiomycetes{class}(66);Chaetothyriales{order}(66);Herpotrichiellaceae{family}(66);Coniosporium{genus}(66);unidentified{species}(66)	Fungi	Ascomycota	Eurotiomycetes	Chaetothyriales	Herpotrichiellaceae	Coniosporium	unidentified
ASV1207	0	0	0	0	0	0	0	0	0	0	0	0	711	0	0	711	Fungi{superkingdom}(87);Ascomycota{phylum}(87);Unassigned{class}(0);Unassigned{order}(0);Unassigned{family}(0);Unassigned{genus}(0);Unassigned{species}(0)	Fungi	Ascomycota	Unassigned	Unassigned	Unassigned	Unassigned	Unassigned
ASV1211	0	0	0	0	0	29	0	0	0	0	0	0	0	0	0	29	Fungi{superkingdom}(99);unidentified{phylum}(99);unidentified{class}(99);unidentified{order}(99);unidentified{family}(99);unidentified{genus}(99);unidentified{species}(99)	Fungi	unidentified	unidentified	unidentified	unidentified	unidentified	unidentified
ASV1212	2	230	0	0	0	0	0	0	0	0	0	0	0	0	0	232	Fungi{superkingdom}(99);Ascomycota{phylum}(99);Eurotiomycetes{class}(99);Chaetothyriales{order}(99);Unassigned{family}(0);Unassigned{genus}(0);Unassigned{species}(0)	Fungi	Ascomycota	Eurotiomycetes	Chaetothyriales	Unassigned	Unassigned	Unassigned
ASV1214	0	0	0	19	9	21	0	22	0	0	33	0	23	38	16	181	Fungi{superkingdom}(100);Unassigned{phylum}(0);Unassigned{class}(0);Unassigned{order}(0);Unassigned{family}(0);Unassigned{genus}(0);Unassigned{species}(0)	Fungi	Unassigned	Unassigned	Unassigned	Unassigned	Unassigned	Unassigned
ASV1216	0	0	0	0	0	0	0	0	0	0	0	37	0	0	0	37	Fungi{superkingdom}(100);Ascomycota{phylum}(100);Sordariomycetes{class}(100);Microascales{order}(100);Microascaceae{family}(100);Mycochlamys{genus}(100);Mycochlamys_macrospora{species}(100)	Fungi	Ascomycota	Sordariomycetes	Microascales	Microascaceae	Mycochlamys	Mycochlamys_macrospora
ASV1218	0	0	0	0	0	0	11	0	0	0	0	0	0	0	41	52	Fungi{superkingdom}(87);Basidiomycota{phylum}(87);Agaricomycetes{class}(87);Agaricales{order}(87);Unassigned{family}(0);Unassigned{genus}(0);Unassigned{species}(0)	Fungi	Basidiomycota	Agaricomycetes	Agaricales	Unassigned	Unassigned	Unassigned
ASV1219	0	0	0	0	0	0	15	195	0	137	0	0	0	0	0	347	Fungi{superkingdom}(62);unidentified{phylum}(62);unidentified{class}(62);unidentified{order}(62);unidentified{family}(62);unidentified{genus}(62);unidentified{species}(62)	Fungi	unidentified	unidentified	unidentified	unidentified	unidentified	unidentified
ASV1223	0	0	0	0	0	0	0	0	0	0	0	0	0	19	0	19	Fungi{superkingdom}(100);Unassigned{phylum}(0);Unassigned{class}(0);Unassigned{order}(0);Unassigned{family}(0);Unassigned{genus}(0);Unassigned{species}(0)	Fungi	Unassigned	Unassigned	Unassigned	Unassigned	Unassigned	Unassigned
ASV1224	0	0	0	0	0	0	0	0	26	0	4	0	0	0	0	30	Fungi{superkingdom}(100);Calcarisporiellomycota{phylum}(100);Calcarisporiellomycetes{class}(100);Calcarisporiellales{order}(100);Calcarisporiellaceae{family}(100);Calcarisporiella{genus}(100);Calcarisporiella_thermophila{species}(100)	Fungi	Calcarisporiellomycota	Calcarisporiellomycetes	Calcarisporiellales	Calcarisporiellaceae	Calcarisporiella	Calcarisporiella_thermophila
ASV1227	0	0	0	0	0	0	0	0	0	0	0	24	56	0	0	80	Fungi{superkingdom}(98);Ascomycota{phylum}(98);Dothideomycetes{class}(98);Pleosporales{order}(98);Didymellaceae{family}(98);Unassigned{genus}(0);Unassigned{species}(0)	Fungi	Ascomycota	Dothideomycetes	Pleosporales	Didymellaceae	Unassigned	Unassigned
ASV1229	8	0	0	0	0	0	0	0	0	0	0	0	0	0	0	8	Fungi{superkingdom}(62);Ascomycota{phylum}(62);Unassigned{class}(0);Unassigned{order}(0);Unassigned{family}(0);Unassigned{genus}(0);Unassigned{species}(0)	Fungi	Ascomycota	Unassigned	Unassigned	Unassigned	Unassigned	Unassigned
ASV1231	0	0	0	0	0	0	0	53	0	13	0	0	0	0	0	66	Fungi{superkingdom}(71);Mortierellomycota{phylum}(71);Mortierellomycetes{class}(71);Mortierellales{order}(71);unidentified{family}(71);unidentified{genus}(71);unidentified{species}(71)	Fungi	Mortierellomycota	Mortierellomycetes	Mortierellales	unidentified	unidentified	unidentified
ASV1233	0	55	0	0	0	58	0	0	0	0	4	0	0	0	0	117	Fungi{superkingdom}(61);Basidiomycota{phylum}(61);Cystobasidiomycetes{class}(61);Cystobasidiomycetes_ord_Incertae_sedis{order}(61);Symmetrosporaceae{family}(61);Symmetrospora{genus}(61);Symmetrospora_vermiculata{species}(61)	Fungi	Basidiomycota	Cystobasidiomycetes	Cystobasidiomycetes_ord_Incertae_sedis	Symmetrosporaceae	Symmetrospora	Symmetrospora_vermiculata
ASV1234	0	0	24	0	0	0	0	0	0	0	0	0	0	0	0	24	Fungi{superkingdom}(64);Basidiomycota{phylum}(64);Agaricomycetes{class}(64);unidentified{order}(64);unidentified{family}(64);unidentified{genus}(64);unidentified{species}(64)	Fungi	Basidiomycota	Agaricomycetes	unidentified	unidentified	unidentified	unidentified
ASV1242	0	134	0	0	0	0	0	0	0	0	0	0	0	0	0	134	Fungi{superkingdom}(76);unidentified{phylum}(76);unidentified{class}(76);unidentified{order}(76);unidentified{family}(76);unidentified{genus}(76);unidentified{species}(76)	Fungi	unidentified	unidentified	unidentified	unidentified	unidentified	unidentified
ASV1246	0	116	0	0	0	0	0	0	0	11	26	0	0	0	122	275	Fungi{superkingdom}(77);Ascomycota{phylum}(77);Sordariomycetes{class}(77);Hypocreales{order}(77);Clavicipitaceae{family}(77);Metarhizium{genus}(77);Unassigned{species}(0)	Fungi	Ascomycota	Sordariomycetes	Hypocreales	Clavicipitaceae	Metarhizium	Unassigned
ASV1251	0	0	0	0	0	0	0	0	0	61	0	0	0	0	0	61	Fungi{superkingdom}(100);Unassigned{phylum}(0);Unassigned{class}(0);Unassigned{order}(0);Unassigned{family}(0);Unassigned{genus}(0);Unassigned{species}(0)	Fungi	Unassigned	Unassigned	Unassigned	Unassigned	Unassigned	Unassigned
ASV1253	0	0	0	0	0	0	0	0	0	0	34	0	0	14	0	48	Fungi{superkingdom}(66);Mortierellomycota{phylum}(66);Mortierellomycetes{class}(66);Mortierellales{order}(66);Mortierellaceae{family}(66);Mortierella{genus}(66);Mortierella_paraensis{species}(66)	Fungi	Mortierellomycota	Mortierellomycetes	Mortierellales	Mortierellaceae	Mortierella	Mortierella_paraensis
ASV1255	0	0	0	0	0	0	0	0	39	0	0	0	0	0	23	62	Fungi{superkingdom}(86);Basidiomycota{phylum}(86);Agaricomycetes{class}(86);Cantharellales{order}(86);Ceratobasidiaceae{family}(86);unidentified{genus}(86);unidentified{species}(86)	Fungi	Basidiomycota	Agaricomycetes	Cantharellales	Ceratobasidiaceae	unidentified	unidentified
ASV1256	12	0	0	0	0	0	0	0	0	0	0	0	0	0	0	12	Fungi{superkingdom}(100);Ascomycota{phylum}(100);Dothideomycetes{class}(100);Capnodiales{order}(100);Mycosphaerellaceae{family}(100);Mycosphaerella{genus}(100);Mycosphaerella_tassiana{species}(100)	Fungi	Ascomycota	Dothideomycetes	Capnodiales	Mycosphaerellaceae	Mycosphaerella	Mycosphaerella_tassiana
ASV1261	0	0	0	0	0	0	17	0	0	3	0	0	0	0	0	20	Fungi{superkingdom}(98);Ascomycota{phylum}(98);Eurotiomycetes{class}(98);Chaetothyriales{order}(98);unidentified{family}(98);unidentified{genus}(98);unidentified{species}(98)	Fungi	Ascomycota	Eurotiomycetes	Chaetothyriales	unidentified	unidentified	unidentified
ASV1262	0	0	0	0	0	0	0	0	0	0	21	0	0	0	0	21	Fungi{superkingdom}(100);Unassigned{phylum}(0);Unassigned{class}(0);Unassigned{order}(0);Unassigned{family}(0);Unassigned{genus}(0);Unassigned{species}(0)	Fungi	Unassigned	Unassigned	Unassigned	Unassigned	Unassigned	Unassigned
ASV1263	0	0	15	0	0	0	0	0	0	0	0	0	0	0	0	15	Fungi{superkingdom}(85);Ascomycota{phylum}(85);Sordariomycetes{class}(85);Xylariales{order}(85);unidentified{family}(85);unidentified{genus}(85);unidentified{species}(85)	Fungi	Ascomycota	Sordariomycetes	Xylariales	unidentified	unidentified	unidentified
ASV1274	0	0	0	0	0	0	0	27	0	0	0	0	0	0	0	27	Fungi{superkingdom}(98);Ascomycota{phylum}(98);Dothideomycetes{class}(98);Acrospermales{order}(98);Acrospermaceae{family}(98);Oomyces{genus}(98);Oomyces_carneoalbus{species}(98)	Fungi	Ascomycota	Dothideomycetes	Acrospermales	Acrospermaceae	Oomyces	Oomyces_carneoalbus
ASV1278	0	0	0	0	0	0	0	674	0	0	0	0	0	0	0	674	Fungi{superkingdom}(73);unidentified{phylum}(73);unidentified{class}(73);unidentified{order}(73);unidentified{family}(73);unidentified{genus}(73);unidentified{species}(73)	Fungi	unidentified	unidentified	unidentified	unidentified	unidentified	unidentified
ASV1280	0	0	0	0	4	0	0	0	0	0	0	0	0	0	0	4	Fungi{superkingdom}(100);Ascomycota{phylum}(100);Eurotiomycetes{class}(100);Chaetothyriales{order}(100);Herpotrichiellaceae{family}(100);Capronia{genus}(100);Capronia_semi-immersa{species}(100)	Fungi	Ascomycota	Eurotiomycetes	Chaetothyriales	Herpotrichiellaceae	Capronia	Capronia_semi-immersa
ASV1286	18	0	0	0	0	0	0	0	0	0	0	0	0	0	0	18	Fungi{superkingdom}(100);Ascomycota{phylum}(100);Dothideomycetes{class}(100);Pleosporales{order}(100);Pleosporales_fam_Incertae_sedis{family}(100);Massariosphaeria{genus}(100);Massariosphaeria_roumeguerei{species}(100)	Fungi	Ascomycota	Dothideomycetes	Pleosporales	Pleosporales_fam_Incertae_sedis	Massariosphaeria	Massariosphaeria_roumeguerei
ASV1288	20	0	0	0	0	0	0	44	0	0	0	0	0	0	0	64	Fungi{superkingdom}(100);Basidiomycota{phylum}(100);Agaricomycetes{class}(100);Agaricales{order}(100);Bolbitiaceae{family}(100);Conocybe{genus}(100);Conocybe_anthracophila{species}(100)	Fungi	Basidiomycota	Agaricomycetes	Agaricales	Bolbitiaceae	Conocybe	Conocybe_anthracophila
ASV1294	0	180	0	0	0	0	0	0	0	0	0	0	0	0	0	180	Fungi{superkingdom}(67);Ascomycota{phylum}(67);Eurotiomycetes{class}(67);Eurotiales{order}(67);Aspergillaceae{family}(67);Penicillium{genus}(67);Penicillium_griseofulvum{species}(67)	Fungi	Ascomycota	Eurotiomycetes	Eurotiales	Aspergillaceae	Penicillium	Penicillium_griseofulvum
ASV1295	0	0	657	0	0	0	0	0	0	0	0	0	0	0	0	657	Fungi{superkingdom}(100);Unassigned{phylum}(0);Unassigned{class}(0);Unassigned{order}(0);Unassigned{family}(0);Unassigned{genus}(0);Unassigned{species}(0)	Fungi	Unassigned	Unassigned	Unassigned	Unassigned	Unassigned	Unassigned
ASV1297	28	0	17	81	0	0	0	0	0	0	0	0	0	0	0	126	Fungi{superkingdom}(98);Glomeromycota{phylum}(98);Glomeromycetes{class}(98);Glomerales{order}(98);Glomeraceae{family}(98);Glomus{genus}(98);Glomus_aggregatum{species}(98)	Fungi	Glomeromycota	Glomeromycetes	Glomerales	Glomeraceae	Glomus	Glomus_aggregatum
ASV1301	0	0	0	0	0	0	0	0	0	0	0	0	0	0	23	23	Fungi{superkingdom}(97);unidentified{phylum}(97);unidentified{class}(97);unidentified{order}(97);unidentified{family}(97);unidentified{genus}(97);unidentified{species}(97)	Fungi	unidentified	unidentified	unidentified	unidentified	unidentified	unidentified
ASV1303	0	0	0	0	0	0	0	22	0	0	0	0	0	0	7	29	Fungi{superkingdom}(99);Basidiomycota{phylum}(99);Tremellomycetes{class}(99);Filobasidiales{order}(99);Filobasidiaceae{family}(99);Filobasidium{genus}(99);Filobasidium_oeirense{species}(99)	Fungi	Basidiomycota	Tremellomycetes	Filobasidiales	Filobasidiaceae	Filobasidium	Filobasidium_oeirense
ASV1308	0	0	0	0	0	0	0	0	0	0	0	0	0	34	0	34	Fungi{superkingdom}(61);Ascomycota{phylum}(61);Dothideomycetes{class}(61);Pleosporales{order}(61);Sporormiaceae{family}(61);Sporormiella{genus}(61);Sporormiella_intermedia{species}(61)	Fungi	Ascomycota	Dothideomycetes	Pleosporales	Sporormiaceae	Sporormiella	Sporormiella_intermedia
ASV1309	0	21	0	0	0	0	0	0	0	0	0	0	0	0	0	21	Fungi{superkingdom}(79);Chytridiomycota{phylum}(79);Spizellomycetes{class}(79);Spizellomycetales{order}(79);unidentified{family}(79);unidentified{genus}(79);unidentified{species}(79)	Fungi	Chytridiomycota	Spizellomycetes	Spizellomycetales	unidentified	unidentified	unidentified
ASV1312	0	0	0	0	2	0	0	0	0	0	0	0	0	0	0	2	Fungi{superkingdom}(95);unidentified{phylum}(95);unidentified{class}(95);unidentified{order}(95);unidentified{family}(95);unidentified{genus}(95);unidentified{species}(95)	Fungi	unidentified	unidentified	unidentified	unidentified	unidentified	unidentified
ASV1314	16	0	0	0	0	0	0	0	24	5	0	0	0	7	0	52	Fungi{superkingdom}(93);Ascomycota{phylum}(93);Sordariomycetes{class}(93);Unassigned{order}(0);Unassigned{family}(0);Unassigned{genus}(0);Unassigned{species}(0)	Fungi	Ascomycota	Sordariomycetes	Unassigned	Unassigned	Unassigned	Unassigned
ASV1316	0	0	0	0	0	0	0	0	0	0	0	0	0	0	39	39	Fungi{superkingdom}(65);unidentified{phylum}(65);unidentified{class}(65);unidentified{order}(65);unidentified{family}(65);unidentified{genus}(65);unidentified{species}(65)	Fungi	unidentified	unidentified	unidentified	unidentified	unidentified	unidentified
ASV1320	0	0	0	0	0	0	0	0	0	0	0	30	53	0	0	83	Fungi{superkingdom}(100);Unassigned{phylum}(0);Unassigned{class}(0);Unassigned{order}(0);Unassigned{family}(0);Unassigned{genus}(0);Unassigned{species}(0)	Fungi	Unassigned	Unassigned	Unassigned	Unassigned	Unassigned	Unassigned
ASV1321	0	0	0	0	0	0	0	7	0	0	0	0	0	0	0	7	Fungi{superkingdom}(100);Ascomycota{phylum}(100);Unassigned{class}(0);Unassigned{order}(0);Unassigned{family}(0);Unassigned{genus}(0);Unassigned{species}(0)	Fungi	Ascomycota	Unassigned	Unassigned	Unassigned	Unassigned	Unassigned
ASV1322	0	0	0	0	0	0	0	421	0	0	0	0	0	0	0	421	Fungi{superkingdom}(99);Basidiomycota{phylum}(99);Agaricomycetes{class}(99);Agaricales{order}(99);Tricholomataceae{family}(99);Melanoleuca{genus}(99);Melanoleuca_griseobrunnea{species}(99)	Fungi	Basidiomycota	Agaricomycetes	Agaricales	Tricholomataceae	Melanoleuca	Melanoleuca_griseobrunnea
ASV1324	0	0	0	0	0	0	0	0	0	0	0	0	152	0	0	152	Fungi{superkingdom}(70);Ascomycota{phylum}(70);Dothideomycetes{class}(70);Unassigned{order}(0);Unassigned{family}(0);Unassigned{genus}(0);Unassigned{species}(0)	Fungi	Ascomycota	Dothideomycetes	Unassigned	Unassigned	Unassigned	Unassigned
ASV1326	0	0	0	0	0	0	0	0	0	0	0	0	0	318	0	318	Fungi{superkingdom}(100);Ascomycota{phylum}(100);Sordariomycetes{class}(100);Sordariales{order}(100);Chaetomiaceae{family}(100);Thielavia{genus}(100);Thielavia_basicola{species}(100)	Fungi	Ascomycota	Sordariomycetes	Sordariales	Chaetomiaceae	Thielavia	Thielavia_basicola
ASV1327	0	0	0	0	0	0	0	0	35	0	0	0	0	0	0	35	Fungi{superkingdom}(96);Basidiomycota{phylum}(96);Agaricomycetes{class}(96);Agaricales{order}(96);Entolomataceae{family}(96);Entoloma{genus}(96);Entoloma_phaeocyathus{species}(96)	Fungi	Basidiomycota	Agaricomycetes	Agaricales	Entolomataceae	Entoloma	Entoloma_phaeocyathus
ASV1329	0	0	0	0	0	0	318	0	0	0	0	0	0	0	0	318	Fungi{superkingdom}(100);Ascomycota{phylum}(100);Dothideomycetes{class}(100);Pleosporales{order}(100);Phaeosphaeriaceae{family}(100);Setophoma{genus}(100);Setophoma_terrestris{species}(100)	Fungi	Ascomycota	Dothideomycetes	Pleosporales	Phaeosphaeriaceae	Setophoma	Setophoma_terrestris
ASV1332	0	0	0	0	0	0	0	0	0	0	0	0	55	0	0	55	Fungi{superkingdom}(94);unidentified{phylum}(94);unidentified{class}(94);unidentified{order}(94);unidentified{family}(94);unidentified{genus}(94);unidentified{species}(94)	Fungi	unidentified	unidentified	unidentified	unidentified	unidentified	unidentified
ASV1333	0	23	0	0	0	0	0	0	56	0	0	36	95	0	0	210	Fungi{superkingdom}(67);Basidiomycota{phylum}(67);Agaricomycetes{class}(67);Agaricales{order}(67);Unassigned{family}(0);Unassigned{genus}(0);Unassigned{species}(0)	Fungi	Basidiomycota	Agaricomycetes	Agaricales	Unassigned	Unassigned	Unassigned
ASV1338	0	0	0	0	0	0	0	0	0	0	83	125	0	0	0	208	Fungi{superkingdom}(81);Basidiomycota{phylum}(81);Agaricomycetes{class}(81);Agaricales{order}(81);Agaricaceae{family}(81);Coprinus{genus}(81);Coprinus_phaeopunctatus{species}(81)	Fungi	Basidiomycota	Agaricomycetes	Agaricales	Agaricaceae	Coprinus	Coprinus_phaeopunctatus
ASV1340	0	0	0	0	11	0	0	0	0	0	0	0	0	0	0	11	Fungi{superkingdom}(75);Basidiomycota{phylum}(75);Agaricomycetes{class}(75);unidentified{order}(75);unidentified{family}(75);unidentified{genus}(75);unidentified{species}(75)	Fungi	Basidiomycota	Agaricomycetes	unidentified	unidentified	unidentified	unidentified
ASV1341	0	617	0	0	0	0	0	0	0	0	0	0	0	0	0	617	Fungi{superkingdom}(83);unidentified{phylum}(83);unidentified{class}(83);unidentified{order}(83);unidentified{family}(83);unidentified{genus}(83);unidentified{species}(83)	Fungi	unidentified	unidentified	unidentified	unidentified	unidentified	unidentified
ASV1343	0	13	0	0	0	0	0	0	0	0	0	0	0	0	0	13	Fungi{superkingdom}(84);Ascomycota{phylum}(84);Dothideomycetes{class}(84);Dothideales{order}(84);Dothideaceae{family}(84);Dothidea{genus}(84);Dothidea_berberidis{species}(84)	Fungi	Ascomycota	Dothideomycetes	Dothideales	Dothideaceae	Dothidea	Dothidea_berberidis
ASV1344	0	0	0	0	0	0	0	0	0	0	0	0	56	0	0	56	Fungi{superkingdom}(61);Ascomycota{phylum}(61);Dothideomycetes{class}(61);Capnodiales{order}(61);Unassigned{family}(0);Unassigned{genus}(0);Unassigned{species}(0)	Fungi	Ascomycota	Dothideomycetes	Capnodiales	Unassigned	Unassigned	Unassigned
ASV1345	0	0	0	0	0	0	0	12	0	0	0	0	0	0	0	12	Fungi{superkingdom}(75);Ascomycota{phylum}(75);Dothideomycetes{class}(75);Pleosporales{order}(75);Phaeosphaeriaceae{family}(75);Paraphoma{genus}(75);Paraphoma_chlamydocopiosa{species}(75)	Fungi	Ascomycota	Dothideomycetes	Pleosporales	Phaeosphaeriaceae	Paraphoma	Paraphoma_chlamydocopiosa
ASV1350	0	0	0	0	0	0	0	0	0	0	608	0	0	0	0	608	Fungi{superkingdom}(61);Basidiomycota{phylum}(61);Agaricomycetes{class}(61);unidentified{order}(61);unidentified{family}(61);unidentified{genus}(61);unidentified{species}(61)	Fungi	Basidiomycota	Agaricomycetes	unidentified	unidentified	unidentified	unidentified
ASV1356	0	0	0	0	0	0	0	0	0	111	0	0	0	0	0	111	Fungi{superkingdom}(96);Ascomycota{phylum}(96);Dothideomycetes{class}(96);Pleosporales{order}(96);Didymellaceae{family}(96);Didymella{genus}(96);Didymella_urticicola{species}(96)	Fungi	Ascomycota	Dothideomycetes	Pleosporales	Didymellaceae	Didymella	Didymella_urticicola
ASV1358	0	0	0	0	4	0	0	0	92	122	0	0	0	0	0	218	Fungi{superkingdom}(78);Ascomycota{phylum}(78);Dothideomycetes{class}(78);Pleosporales{order}(78);Torulaceae{family}(78);Torula{genus}(78);Unassigned{species}(0)	Fungi	Ascomycota	Dothideomycetes	Pleosporales	Torulaceae	Torula	Unassigned
ASV1359	0	0	0	0	0	0	0	0	0	114	0	0	0	0	0	114	Fungi{superkingdom}(87);Ascomycota{phylum}(87);Leotiomycetes{class}(87);Helotiales{order}(87);Helotiales_fam_Incertae_sedis{family}(87);Cadophora{genus}(87);Cadophora_luteo-olivacea{species}(87)	Fungi	Ascomycota	Leotiomycetes	Helotiales	Helotiales_fam_Incertae_sedis	Cadophora	Cadophora_luteo-olivacea
ASV1360	0	600	0	0	0	0	0	0	0	0	0	0	0	0	0	600	Fungi{superkingdom}(96);Ascomycota{phylum}(96);Sordariomycetes{class}(96);Hypocreales{order}(96);Cordycipitaceae{family}(96);Parengyodontium{genus}(96);Parengyodontium_album{species}(96)	Fungi	Ascomycota	Sordariomycetes	Hypocreales	Cordycipitaceae	Parengyodontium	Parengyodontium_album
ASV1361	0	0	0	0	0	0	0	0	0	0	0	89	0	0	0	89	Fungi{superkingdom}(100);Basidiomycota{phylum}(100);Agaricomycetes{class}(100);Agaricales{order}(100);Entolomataceae{family}(100);Entoloma{genus}(100);Entoloma_rusticoides{species}(100)	Fungi	Basidiomycota	Agaricomycetes	Agaricales	Entolomataceae	Entoloma	Entoloma_rusticoides
ASV1367	0	0	0	0	0	0	0	0	0	202	0	0	0	40	0	242	Fungi{superkingdom}(72);Ascomycota{phylum}(72);Sordariomycetes{class}(72);Hypocreales{order}(72);Stachybotryaceae{family}(72);Paramyrothecium{genus}(72);Unassigned{species}(0)	Fungi	Ascomycota	Sordariomycetes	Hypocreales	Stachybotryaceae	Paramyrothecium	Unassigned
ASV1370	0	0	0	0	0	0	35	0	0	0	0	0	0	0	0	35	Fungi{superkingdom}(81);Ascomycota{phylum}(81);Sordariomycetes{class}(81);Sordariales{order}(81);Chaetomiaceae{family}(81);Humicola{genus}(81);Humicola_parvispora{species}(81)	Fungi	Ascomycota	Sordariomycetes	Sordariales	Chaetomiaceae	Humicola	Humicola_parvispora
ASV1373	0	0	0	0	0	0	0	21	0	0	0	0	0	0	0	21	Fungi{superkingdom}(87);Ascomycota{phylum}(87);Dothideomycetes{class}(87);Pleosporales{order}(87);Unassigned{family}(0);Unassigned{genus}(0);Unassigned{species}(0)	Fungi	Ascomycota	Dothideomycetes	Pleosporales	Unassigned	Unassigned	Unassigned
ASV1374	0	0	92	0	0	0	0	0	34	0	0	0	0	0	0	126	Fungi{superkingdom}(84);Glomeromycota{phylum}(84);Glomeromycetes{class}(84);Glomerales{order}(84);Glomeraceae{family}(84);Glomus{genus}(84);Glomus_aggregatum{species}(84)	Fungi	Glomeromycota	Glomeromycetes	Glomerales	Glomeraceae	Glomus	Glomus_aggregatum
ASV1378	0	40	0	0	440	0	0	0	0	0	0	0	0	0	0	480	Fungi{superkingdom}(79);Ascomycota{phylum}(79);Sordariomycetes{class}(79);Xylariales{order}(79);Xylariales_fam_Incertae_sedis{family}(79);Phialemoniopsis{genus}(79);Phialemoniopsis_ocularis{species}(79)	Fungi	Ascomycota	Sordariomycetes	Xylariales	Xylariales_fam_Incertae_sedis	Phialemoniopsis	Phialemoniopsis_ocularis
ASV1379	0	0	0	0	3	0	0	23	0	0	0	0	0	0	0	26	Fungi{superkingdom}(100);Basidiomycota{phylum}(100);Geminibasidiomycetes{class}(100);Geminibasidiales{order}(100);Geminibasidiaceae{family}(100);Basidioascus{genus}(100);Basidioascus_persicus{species}(100)	Fungi	Basidiomycota	Geminibasidiomycetes	Geminibasidiales	Geminibasidiaceae	Basidioascus	Basidioascus_persicus
ASV1382	0	0	0	0	0	0	0	0	0	0	0	0	37	0	0	37	Fungi{superkingdom}(99);Chytridiomycota{phylum}(99);Spizellomycetes{class}(99);Spizellomycetales{order}(99);Spizellomycetaceae{family}(99);unidentified{genus}(99);unidentified{species}(99)	Fungi	Chytridiomycota	Spizellomycetes	Spizellomycetales	Spizellomycetaceae	unidentified	unidentified
ASV1383	12	0	0	0	0	0	0	35	41	0	0	0	0	0	0	88	Fungi{superkingdom}(81);unidentified{phylum}(81);unidentified{class}(81);unidentified{order}(81);unidentified{family}(81);unidentified{genus}(81);unidentified{species}(81)	Fungi	unidentified	unidentified	unidentified	unidentified	unidentified	unidentified
ASV1385	0	0	0	0	0	0	0	0	0	0	0	0	0	0	33	33	Fungi{superkingdom}(62);Basidiomycota{phylum}(62);Agaricomycetes{class}(62);Polyporales{order}(62);Fomitopsidaceae{family}(62);Postia{genus}(62);Unassigned{species}(0)	Fungi	Basidiomycota	Agaricomycetes	Polyporales	Fomitopsidaceae	Postia	Unassigned
ASV1387	0	0	0	0	0	0	0	0	0	0	0	28	0	0	0	28	Fungi{superkingdom}(73);Ascomycota{phylum}(73);Sordariomycetes{class}(73);Sordariales{order}(73);Unassigned{family}(0);Unassigned{genus}(0);Unassigned{species}(0)	Fungi	Ascomycota	Sordariomycetes	Sordariales	Unassigned	Unassigned	Unassigned
ASV1397	0	0	0	0	0	0	0	0	0	0	0	0	0	14	0	14	Fungi{superkingdom}(100);Unassigned{phylum}(0);Unassigned{class}(0);Unassigned{order}(0);Unassigned{family}(0);Unassigned{genus}(0);Unassigned{species}(0)	Fungi	Unassigned	Unassigned	Unassigned	Unassigned	Unassigned	Unassigned
ASV1398	0	0	0	0	0	0	0	10	0	0	0	0	0	7	0	17	Fungi{superkingdom}(100);Unassigned{phylum}(0);Unassigned{class}(0);Unassigned{order}(0);Unassigned{family}(0);Unassigned{genus}(0);Unassigned{species}(0)	Fungi	Unassigned	Unassigned	Unassigned	Unassigned	Unassigned	Unassigned
ASV1400	0	0	0	0	0	0	0	35	41	0	0	0	0	0	0	76	Fungi{superkingdom}(93);Ascomycota{phylum}(93);Dothideomycetes{class}(93);Pleosporales{order}(93);Lentitheciaceae{family}(93);Darksidea{genus}(93);unidentified{species}(93)	Fungi	Ascomycota	Dothideomycetes	Pleosporales	Lentitheciaceae	Darksidea	unidentified
ASV1404	0	0	0	0	0	0	0	0	13	0	0	0	0	0	0	13	Fungi{superkingdom}(100);Unassigned{phylum}(0);Unassigned{class}(0);Unassigned{order}(0);Unassigned{family}(0);Unassigned{genus}(0);Unassigned{species}(0)	Fungi	Unassigned	Unassigned	Unassigned	Unassigned	Unassigned	Unassigned
ASV1406	0	0	0	0	0	0	0	0	19	0	0	0	0	0	0	19	Fungi{superkingdom}(87);Ascomycota{phylum}(87);Eurotiomycetes{class}(87);Chaetothyriales{order}(87);Trichomeriaceae{family}(87);Bradymyces{genus}(87);unidentified{species}(87)	Fungi	Ascomycota	Eurotiomycetes	Chaetothyriales	Trichomeriaceae	Bradymyces	unidentified
ASV1407	0	0	0	0	0	0	0	0	0	14	0	0	0	0	0	14	Fungi{superkingdom}(98);unidentified{phylum}(98);unidentified{class}(98);unidentified{order}(98);unidentified{family}(98);unidentified{genus}(98);unidentified{species}(98)	Fungi	unidentified	unidentified	unidentified	unidentified	unidentified	unidentified
ASV1408	0	0	0	0	0	0	0	0	0	0	0	0	35	9	0	44	Fungi{superkingdom}(75);Ascomycota{phylum}(75);Dothideomycetes{class}(75);Pleosporales{order}(75);Unassigned{family}(0);Unassigned{genus}(0);Unassigned{species}(0)	Fungi	Ascomycota	Dothideomycetes	Pleosporales	Unassigned	Unassigned	Unassigned
ASV1409	4	0	0	0	0	0	11	0	0	0	0	0	54	0	0	69	Fungi{superkingdom}(98);Ascomycota{phylum}(98);Leotiomycetes{class}(98);Erysiphales{order}(98);Erysiphaceae{family}(98);Erysiphe{genus}(98);Erysiphe_convolvuli{species}(98)	Fungi	Ascomycota	Leotiomycetes	Erysiphales	Erysiphaceae	Erysiphe	Erysiphe_convolvuli
ASV1410	0	51	0	0	0	0	0	0	0	0	0	0	0	0	0	51	Fungi{superkingdom}(64);unidentified{phylum}(64);unidentified{class}(64);unidentified{order}(64);unidentified{family}(64);unidentified{genus}(64);unidentified{species}(64)	Fungi	unidentified	unidentified	unidentified	unidentified	unidentified	unidentified
ASV1412	0	0	0	0	0	0	0	5	0	0	0	0	0	0	0	5	Fungi{superkingdom}(100);Unassigned{phylum}(0);Unassigned{class}(0);Unassigned{order}(0);Unassigned{family}(0);Unassigned{genus}(0);Unassigned{species}(0)	Fungi	Unassigned	Unassigned	Unassigned	Unassigned	Unassigned	Unassigned
ASV1413	0	0	0	0	0	0	0	0	0	9	0	0	0	0	0	9	Fungi{superkingdom}(95);Ascomycota{phylum}(95);Sordariomycetes{class}(95);Unassigned{order}(0);Unassigned{family}(0);Unassigned{genus}(0);Unassigned{species}(0)	Fungi	Ascomycota	Sordariomycetes	Unassigned	Unassigned	Unassigned	Unassigned
ASV1416	0	0	0	6	0	0	0	0	0	0	0	0	0	0	0	6	Fungi{superkingdom}(100);Ascomycota{phylum}(100);Orbiliomycetes{class}(100);Orbiliales{order}(100);Orbiliaceae{family}(100);Arthrobotrys{genus}(100);Arthrobotrys_brochopaga{species}(100)	Fungi	Ascomycota	Orbiliomycetes	Orbiliales	Orbiliaceae	Arthrobotrys	Arthrobotrys_brochopaga
ASV1422	0	0	0	7	0	22	0	0	0	0	0	0	0	0	0	29	Fungi{superkingdom}(99);Ascomycota{phylum}(99);Dothideomycetes{class}(99);Pleosporales{order}(99);Phaeosphaeriaceae{family}(99);Unassigned{genus}(0);Unassigned{species}(0)	Fungi	Ascomycota	Dothideomycetes	Pleosporales	Phaeosphaeriaceae	Unassigned	Unassigned
ASV1423	0	410	0	0	42	0	0	0	0	0	0	0	0	0	0	452	Fungi{superkingdom}(86);unidentified{phylum}(86);unidentified{class}(86);unidentified{order}(86);unidentified{family}(86);unidentified{genus}(86);unidentified{species}(86)	Fungi	unidentified	unidentified	unidentified	unidentified	unidentified	unidentified
ASV1435	0	0	0	0	0	0	0	0	0	0	0	44	0	0	0	44	Fungi{superkingdom}(100);Unassigned{phylum}(0);Unassigned{class}(0);Unassigned{order}(0);Unassigned{family}(0);Unassigned{genus}(0);Unassigned{species}(0)	Fungi	Unassigned	Unassigned	Unassigned	Unassigned	Unassigned	Unassigned
ASV1436	0	32	0	0	0	0	0	0	0	0	0	0	0	0	0	32	Fungi{superkingdom}(96);unidentified{phylum}(96);unidentified{class}(96);unidentified{order}(96);unidentified{family}(96);unidentified{genus}(96);unidentified{species}(96)	Fungi	unidentified	unidentified	unidentified	unidentified	unidentified	unidentified
ASV1437	0	0	0	0	0	0	0	0	0	155	0	0	0	0	0	155	Fungi{superkingdom}(100);Unassigned{phylum}(0);Unassigned{class}(0);Unassigned{order}(0);Unassigned{family}(0);Unassigned{genus}(0);Unassigned{species}(0)	Fungi	Unassigned	Unassigned	Unassigned	Unassigned	Unassigned	Unassigned
ASV1441	0	0	0	0	0	24	0	0	0	0	0	0	0	0	0	24	Fungi{superkingdom}(61);Ascomycota{phylum}(61);Sordariomycetes{class}(61);Unassigned{order}(0);Unassigned{family}(0);Unassigned{genus}(0);Unassigned{species}(0)	Fungi	Ascomycota	Sordariomycetes	Unassigned	Unassigned	Unassigned	Unassigned
ASV1443	0	0	0	0	0	0	0	0	0	0	23	0	0	0	0	23	Fungi{superkingdom}(100);Basidiomycota{phylum}(100);Agaricomycetes{class}(100);Agaricales{order}(100);Entolomataceae{family}(100);Entoloma{genus}(100);Entoloma_rusticoides{species}(100)	Fungi	Basidiomycota	Agaricomycetes	Agaricales	Entolomataceae	Entoloma	Entoloma_rusticoides
ASV1455	0	75	0	0	0	0	0	0	0	0	0	0	0	0	0	75	Fungi{superkingdom}(71);Ascomycota{phylum}(71);Sordariomycetes{class}(71);Sordariales{order}(71);Unassigned{family}(0);Unassigned{genus}(0);Unassigned{species}(0)	Fungi	Ascomycota	Sordariomycetes	Sordariales	Unassigned	Unassigned	Unassigned
ASV1456	0	0	0	3	0	0	0	0	0	0	28	0	0	0	0	31	Fungi{superkingdom}(69);Basidiomycota{phylum}(69);Agaricomycetes{class}(69);unidentified{order}(69);unidentified{family}(69);unidentified{genus}(69);unidentified{species}(69)	Fungi	Basidiomycota	Agaricomycetes	unidentified	unidentified	unidentified	unidentified
ASV1457	0	0	0	5	0	0	0	0	35	0	0	0	0	0	31	71	Fungi{superkingdom}(61);unidentified{phylum}(61);unidentified{class}(61);unidentified{order}(61);unidentified{family}(61);unidentified{genus}(61);unidentified{species}(61)	Fungi	unidentified	unidentified	unidentified	unidentified	unidentified	unidentified
ASV1458	0	0	0	0	12	0	0	0	0	0	0	0	0	0	0	12	Fungi{superkingdom}(100);Ascomycota{phylum}(100);Sordariomycetes{class}(100);Hypocreales{order}(100);Cordycipitaceae{family}(100);Lecanicillium{genus}(100);Lecanicillium_lecanii{species}(100)	Fungi	Ascomycota	Sordariomycetes	Hypocreales	Cordycipitaceae	Lecanicillium	Lecanicillium_lecanii
ASV1459	0	396	0	0	0	0	0	0	0	0	0	0	0	0	0	396	Fungi{superkingdom}(100);Unassigned{phylum}(0);Unassigned{class}(0);Unassigned{order}(0);Unassigned{family}(0);Unassigned{genus}(0);Unassigned{species}(0)	Fungi	Unassigned	Unassigned	Unassigned	Unassigned	Unassigned	Unassigned
ASV1461	0	0	0	0	0	0	0	0	0	0	0	0	0	58	0	58	Fungi{superkingdom}(95);Glomeromycota{phylum}(95);Glomeromycetes{class}(95);Glomerales{order}(95);Glomeraceae{family}(95);Glomus{genus}(95);unidentified{species}(95)	Fungi	Glomeromycota	Glomeromycetes	Glomerales	Glomeraceae	Glomus	unidentified
ASV1475	0	0	0	0	0	0	0	0	0	19	0	0	0	0	0	19	Fungi{superkingdom}(100);Ascomycota{phylum}(100);Dothideomycetes{class}(100);Pleosporales{order}(100);Sporormiaceae{family}(100);Preussia{genus}(100);Preussia_persica{species}(100)	Fungi	Ascomycota	Dothideomycetes	Pleosporales	Sporormiaceae	Preussia	Preussia_persica
ASV1477	9	0	24	0	0	0	0	0	0	0	0	0	0	0	0	33	Fungi{superkingdom}(64);Ascomycota{phylum}(64);Dothideomycetes{class}(64);Pleosporales{order}(64);unidentified{family}(64);unidentified{genus}(64);unidentified{species}(64)	Fungi	Ascomycota	Dothideomycetes	Pleosporales	unidentified	unidentified	unidentified
ASV1482	0	0	0	59	0	0	0	0	0	0	0	0	0	0	0	59	Fungi{superkingdom}(73);Glomeromycota{phylum}(73);Glomeromycetes{class}(73);Glomerales{order}(73);Glomeraceae{family}(73);Glomus{genus}(73);Glomus_aggregatum{species}(73)	Fungi	Glomeromycota	Glomeromycetes	Glomerales	Glomeraceae	Glomus	Glomus_aggregatum
ASV1483	0	72	0	0	0	0	0	0	0	0	0	0	0	0	0	72	Fungi{superkingdom}(100);Basidiomycota{phylum}(100);Agaricomycetes{class}(100);Agaricales{order}(100);Entolomataceae{family}(100);Entoloma{genus}(100);Entoloma_rusticoides{species}(100)	Fungi	Basidiomycota	Agaricomycetes	Agaricales	Entolomataceae	Entoloma	Entoloma_rusticoides
ASV1485	0	23	0	0	0	0	0	0	0	0	0	0	0	0	0	23	Fungi{superkingdom}(99);Ascomycota{phylum}(99);Dothideomycetes{class}(99);Pleosporales{order}(99);Lophiostomataceae{family}(99);Unassigned{genus}(0);Unassigned{species}(0)	Fungi	Ascomycota	Dothideomycetes	Pleosporales	Lophiostomataceae	Unassigned	Unassigned
ASV1488	27	0	0	0	20	0	0	0	0	0	0	0	0	0	0	47	Fungi{superkingdom}(76);Basidiomycota{phylum}(76);Agaricomycetes{class}(76);unidentified{order}(76);unidentified{family}(76);unidentified{genus}(76);unidentified{species}(76)	Fungi	Basidiomycota	Agaricomycetes	unidentified	unidentified	unidentified	unidentified
ASV1491	0	0	0	0	0	0	0	0	27	0	0	0	0	0	0	27	Fungi{superkingdom}(100);Unassigned{phylum}(0);Unassigned{class}(0);Unassigned{order}(0);Unassigned{family}(0);Unassigned{genus}(0);Unassigned{species}(0)	Fungi	Unassigned	Unassigned	Unassigned	Unassigned	Unassigned	Unassigned
ASV1492	0	0	0	192	0	0	0	0	0	0	0	0	0	0	0	192	Fungi{superkingdom}(63);unidentified{phylum}(63);unidentified{class}(63);unidentified{order}(63);unidentified{family}(63);unidentified{genus}(63);unidentified{species}(63)	Fungi	unidentified	unidentified	unidentified	unidentified	unidentified	unidentified
ASV1494	0	0	30	0	0	0	0	0	0	0	0	0	0	0	0	30	Fungi{superkingdom}(97);Ascomycota{phylum}(97);Sordariomycetes{class}(97);Hypocreales{order}(97);Stachybotryaceae{family}(97);Striatibotrys{genus}(97);Striatibotrys_eucylindrospora{species}(97)	Fungi	Ascomycota	Sordariomycetes	Hypocreales	Stachybotryaceae	Striatibotrys	Striatibotrys_eucylindrospora
ASV1501	0	0	0	0	0	0	0	0	0	0	0	0	0	53	0	53	Fungi{superkingdom}(99);Basidiomycota{phylum}(99);Tremellomycetes{class}(99);Filobasidiales{order}(99);Piskurozymaceae{family}(99);Solicoccozyma{genus}(99);Solicoccozyma_aeria{species}(99)	Fungi	Basidiomycota	Tremellomycetes	Filobasidiales	Piskurozymaceae	Solicoccozyma	Solicoccozyma_aeria
ASV1502	0	0	0	0	0	0	0	0	201	0	0	0	0	0	0	201	Fungi{superkingdom}(100);Unassigned{phylum}(0);Unassigned{class}(0);Unassigned{order}(0);Unassigned{family}(0);Unassigned{genus}(0);Unassigned{species}(0)	Fungi	Unassigned	Unassigned	Unassigned	Unassigned	Unassigned	Unassigned
ASV1503	0	0	17	0	0	0	0	0	41	0	0	0	0	53	0	111	Fungi{superkingdom}(70);Ascomycota{phylum}(70);Eurotiomycetes{class}(70);Chaetothyriales{order}(70);Trichomeriaceae{family}(70);Bradymyces{genus}(70);unidentified{species}(70)	Fungi	Ascomycota	Eurotiomycetes	Chaetothyriales	Trichomeriaceae	Bradymyces	unidentified
ASV1509	0	0	0	0	0	0	0	0	0	0	0	0	0	114	0	114	Fungi{superkingdom}(100);Unassigned{phylum}(0);Unassigned{class}(0);Unassigned{order}(0);Unassigned{family}(0);Unassigned{genus}(0);Unassigned{species}(0)	Fungi	Unassigned	Unassigned	Unassigned	Unassigned	Unassigned	Unassigned
ASV1516	52	0	0	0	0	0	0	0	0	0	0	0	0	0	0	52	Fungi{superkingdom}(91);Ascomycota{phylum}(91);Sordariomycetes{class}(91);Xylariales{order}(91);Diatrypaceae{family}(91);Monosporascus{genus}(91);unidentified{species}(91)	Fungi	Ascomycota	Sordariomycetes	Xylariales	Diatrypaceae	Monosporascus	unidentified
ASV1517	0	0	0	0	7	0	0	33	0	0	0	0	0	29	0	69	Fungi{superkingdom}(100);Unassigned{phylum}(0);Unassigned{class}(0);Unassigned{order}(0);Unassigned{family}(0);Unassigned{genus}(0);Unassigned{species}(0)	Fungi	Unassigned	Unassigned	Unassigned	Unassigned	Unassigned	Unassigned
ASV1520	0	0	0	0	0	22	0	0	0	7	0	0	0	0	0	29	Fungi{superkingdom}(90);Ascomycota{phylum}(90);Eurotiomycetes{class}(90);Chaetothyriales{order}(90);Trichomeriaceae{family}(90);Bradymyces{genus}(90);unidentified{species}(90)	Fungi	Ascomycota	Eurotiomycetes	Chaetothyriales	Trichomeriaceae	Bradymyces	unidentified
ASV1526	0	0	0	0	0	0	0	0	0	0	0	291	0	30	0	321	Fungi{superkingdom}(100);Unassigned{phylum}(0);Unassigned{class}(0);Unassigned{order}(0);Unassigned{family}(0);Unassigned{genus}(0);Unassigned{species}(0)	Fungi	Unassigned	Unassigned	Unassigned	Unassigned	Unassigned	Unassigned
ASV1529	0	0	0	0	0	0	0	99	0	0	0	0	0	0	0	99	Fungi{superkingdom}(89);Ascomycota{phylum}(89);Dothideomycetes{class}(89);Pleosporales{order}(89);Didymosphaeriaceae{family}(89);Pseudopithomyces{genus}(89);Pseudopithomyces_rosae{species}(89)	Fungi	Ascomycota	Dothideomycetes	Pleosporales	Didymosphaeriaceae	Pseudopithomyces	Pseudopithomyces_rosae
ASV1535	0	0	0	0	0	0	0	0	0	0	0	0	0	0	454	454	Fungi{superkingdom}(78);unidentified{phylum}(78);unidentified{class}(78);unidentified{order}(78);unidentified{family}(78);unidentified{genus}(78);unidentified{species}(78)	Fungi	unidentified	unidentified	unidentified	unidentified	unidentified	unidentified
ASV1537	0	0	0	0	0	0	13	0	0	0	0	0	0	0	0	13	Fungi{superkingdom}(99);unidentified{phylum}(99);unidentified{class}(99);unidentified{order}(99);unidentified{family}(99);unidentified{genus}(99);unidentified{species}(99)	Fungi	unidentified	unidentified	unidentified	unidentified	unidentified	unidentified
ASV1542	0	0	0	0	0	32	0	0	0	9	0	0	0	0	0	41	Fungi{superkingdom}(100);Unassigned{phylum}(0);Unassigned{class}(0);Unassigned{order}(0);Unassigned{family}(0);Unassigned{genus}(0);Unassigned{species}(0)	Fungi	Unassigned	Unassigned	Unassigned	Unassigned	Unassigned	Unassigned
ASV1546	0	19	0	0	0	0	0	0	77	0	0	0	0	0	0	96	Fungi{superkingdom}(69);Basidiomycota{phylum}(69);Tremellomycetes{class}(69);Tremellales{order}(69);Cryptococcaceae{family}(69);Kwoniella{genus}(69);Kwoniella_betulae{species}(69)	Fungi	Basidiomycota	Tremellomycetes	Tremellales	Cryptococcaceae	Kwoniella	Kwoniella_betulae
ASV1548	0	54	0	0	0	0	0	0	0	0	0	0	0	0	0	54	Fungi{superkingdom}(86);Glomeromycota{phylum}(86);Glomeromycetes{class}(86);Glomerales{order}(86);Glomeraceae{family}(86);Glomus{genus}(86);Glomus_aggregatum{species}(86)	Fungi	Glomeromycota	Glomeromycetes	Glomerales	Glomeraceae	Glomus	Glomus_aggregatum
ASV1549	0	0	0	0	0	0	189	0	0	35	0	0	0	0	0	224	Fungi{superkingdom}(61);Basidiomycota{phylum}(61);Agaricomycetes{class}(61);Unassigned{order}(0);Unassigned{family}(0);Unassigned{genus}(0);Unassigned{species}(0)	Fungi	Basidiomycota	Agaricomycetes	Unassigned	Unassigned	Unassigned	Unassigned
ASV1551	0	0	0	0	0	0	0	0	0	0	0	0	0	21	0	21	Fungi{superkingdom}(83);Ascomycota{phylum}(83);Unassigned{class}(0);Unassigned{order}(0);Unassigned{family}(0);Unassigned{genus}(0);Unassigned{species}(0)	Fungi	Ascomycota	Unassigned	Unassigned	Unassigned	Unassigned	Unassigned
ASV1553	0	27	0	0	0	44	0	0	0	0	0	0	0	0	0	71	Fungi{superkingdom}(69);Ascomycota{phylum}(69);Unassigned{class}(0);Unassigned{order}(0);Unassigned{family}(0);Unassigned{genus}(0);Unassigned{species}(0)	Fungi	Ascomycota	Unassigned	Unassigned	Unassigned	Unassigned	Unassigned
ASV1554	0	0	0	0	0	0	0	0	0	21	0	0	0	0	0	21	Fungi{superkingdom}(94);Basidiomycota{phylum}(94);Geminibasidiomycetes{class}(94);Geminibasidiales{order}(94);Geminibasidiaceae{family}(94);Geminibasidium{genus}(94);Geminibasidium_hirsutum{species}(94)	Fungi	Basidiomycota	Geminibasidiomycetes	Geminibasidiales	Geminibasidiaceae	Geminibasidium	Geminibasidium_hirsutum
ASV1555	0	122	0	0	0	0	0	0	0	0	0	0	0	0	0	122	Fungi{superkingdom}(98);Ascomycota{phylum}(98);Eurotiomycetes{class}(98);Chaetothyriales{order}(98);Trichomeriaceae{family}(98);Knufia{genus}(98);Unassigned{species}(0)	Fungi	Ascomycota	Eurotiomycetes	Chaetothyriales	Trichomeriaceae	Knufia	Unassigned
ASV1560	0	0	0	0	359	0	0	0	0	0	0	0	0	0	0	359	Fungi{superkingdom}(98);Ascomycota{phylum}(98);Sordariomycetes{class}(98);Hypocreales{order}(98);Nectriaceae{family}(98);Fusarium{genus}(98);Fusarium_solani{species}(98)	Fungi	Ascomycota	Sordariomycetes	Hypocreales	Nectriaceae	Fusarium	Fusarium_solani
ASV1566	0	0	0	0	0	0	0	0	0	0	0	39	0	214	0	253	Fungi{superkingdom}(100);Unassigned{phylum}(0);Unassigned{class}(0);Unassigned{order}(0);Unassigned{family}(0);Unassigned{genus}(0);Unassigned{species}(0)	Fungi	Unassigned	Unassigned	Unassigned	Unassigned	Unassigned	Unassigned
ASV1570	0	0	0	0	0	0	0	0	37	0	0	0	0	0	48	85	Fungi{superkingdom}(75);unidentified{phylum}(75);unidentified{class}(75);unidentified{order}(75);unidentified{family}(75);unidentified{genus}(75);unidentified{species}(75)	Fungi	unidentified	unidentified	unidentified	unidentified	unidentified	unidentified
ASV1575	0	0	0	0	0	0	0	0	0	0	0	66	0	0	0	66	Fungi{superkingdom}(100);Basidiomycota{phylum}(100);Agaricomycetes{class}(100);Agaricales{order}(100);Entolomataceae{family}(100);Entoloma{genus}(100);Entoloma_graphitipes_f._cystidiatum{species}(100)	Fungi	Basidiomycota	Agaricomycetes	Agaricales	Entolomataceae	Entoloma	Entoloma_graphitipes_f._cystidiatum
ASV1578	0	22	0	0	0	0	0	0	0	0	0	0	0	0	38	60	Fungi{superkingdom}(77);Ascomycota{phylum}(77);Sordariomycetes{class}(77);Hypocreales{order}(77);Hypocreales_fam_Incertae_sedis{family}(77);Acremonium{genus}(77);Acremonium_dichromosporum{species}(77)	Fungi	Ascomycota	Sordariomycetes	Hypocreales	Hypocreales_fam_Incertae_sedis	Acremonium	Acremonium_dichromosporum
ASV1579	0	0	0	0	0	0	0	0	0	0	0	0	15	0	0	15	Fungi{superkingdom}(100);Glomeromycota{phylum}(100);Glomeromycetes{class}(100);Glomerales{order}(100);Glomeraceae{family}(100);Dominikia{genus}(100);unidentified{species}(100)	Fungi	Glomeromycota	Glomeromycetes	Glomerales	Glomeraceae	Dominikia	unidentified
ASV1582	0	0	0	0	0	387	0	0	0	0	0	0	0	0	0	387	Fungi{superkingdom}(100);Unassigned{phylum}(0);Unassigned{class}(0);Unassigned{order}(0);Unassigned{family}(0);Unassigned{genus}(0);Unassigned{species}(0)	Fungi	Unassigned	Unassigned	Unassigned	Unassigned	Unassigned	Unassigned
ASV1583	0	0	285	0	0	0	0	0	0	0	0	0	0	0	0	285	Fungi{superkingdom}(70);Ascomycota{phylum}(70);Unassigned{class}(0);Unassigned{order}(0);Unassigned{family}(0);Unassigned{genus}(0);Unassigned{species}(0)	Fungi	Ascomycota	Unassigned	Unassigned	Unassigned	Unassigned	Unassigned
ASV1585	0	0	0	0	0	0	0	42	0	0	0	0	0	0	0	42	Fungi{superkingdom}(74);Ascomycota{phylum}(74);Unassigned{class}(0);Unassigned{order}(0);Unassigned{family}(0);Unassigned{genus}(0);Unassigned{species}(0)	Fungi	Ascomycota	Unassigned	Unassigned	Unassigned	Unassigned	Unassigned
ASV1587	0	0	0	0	0	0	0	0	0	0	0	50	0	0	0	50	Fungi{superkingdom}(85);Ascomycota{phylum}(85);Dothideomycetes{class}(85);Pleosporales{order}(85);Unassigned{family}(0);Unassigned{genus}(0);Unassigned{species}(0)	Fungi	Ascomycota	Dothideomycetes	Pleosporales	Unassigned	Unassigned	Unassigned
ASV1588	0	3	6	0	0	0	0	0	0	0	0	0	0	0	0	9	Fungi{superkingdom}(100);Ascomycota{phylum}(100);Sordariomycetes{class}(100);Hypocreales{order}(100);Ophiocordycipitaceae{family}(100);Purpureocillium{genus}(100);Purpureocillium_lilacinum{species}(100)	Fungi	Ascomycota	Sordariomycetes	Hypocreales	Ophiocordycipitaceae	Purpureocillium	Purpureocillium_lilacinum
ASV1591	0	0	0	0	0	0	0	0	342	0	0	0	0	0	0	342	Fungi{superkingdom}(100);Ascomycota{phylum}(100);Eurotiomycetes{class}(100);Onygenales{order}(100);Onygenales_fam_Incertae_sedis{family}(100);Chrysosporium{genus}(100);Chrysosporium_lobatum{species}(100)	Fungi	Ascomycota	Eurotiomycetes	Onygenales	Onygenales_fam_Incertae_sedis	Chrysosporium	Chrysosporium_lobatum
ASV1595	0	0	0	0	0	7	0	0	0	0	0	0	0	0	0	7	Fungi{superkingdom}(91);unidentified{phylum}(91);unidentified{class}(91);unidentified{order}(91);unidentified{family}(91);unidentified{genus}(91);unidentified{species}(91)	Fungi	unidentified	unidentified	unidentified	unidentified	unidentified	unidentified
ASV1596	0	0	0	0	0	0	161	0	0	0	0	0	0	0	0	161	Fungi{superkingdom}(85);Ascomycota{phylum}(85);Dothideomycetes{class}(85);Pleosporales{order}(85);Unassigned{family}(0);Unassigned{genus}(0);Unassigned{species}(0)	Fungi	Ascomycota	Dothideomycetes	Pleosporales	Unassigned	Unassigned	Unassigned
ASV1598	0	0	0	0	3	0	0	0	0	0	0	0	0	0	0	3	Fungi{superkingdom}(66);Ascomycota{phylum}(66);Sordariomycetes{class}(66);Hypocreales{order}(66);Bionectriaceae{family}(66);Hydropisphaera{genus}(66);Hydropisphaera_fungicola{species}(66)	Fungi	Ascomycota	Sordariomycetes	Hypocreales	Bionectriaceae	Hydropisphaera	Hydropisphaera_fungicola
ASV1607	0	0	20	0	0	0	0	0	0	0	0	0	0	0	0	20	Fungi{superkingdom}(77);Ascomycota{phylum}(77);Leotiomycetes{class}(77);Helotiales{order}(77);Helotiales_fam_Incertae_sedis{family}(77);Cadophora{genus}(77);Unassigned{species}(0)	Fungi	Ascomycota	Leotiomycetes	Helotiales	Helotiales_fam_Incertae_sedis	Cadophora	Unassigned
ASV1608	6	18	0	0	0	9	0	0	0	0	0	39	0	0	0	72	Fungi{superkingdom}(97);Basidiomycota{phylum}(97);Tremellomycetes{class}(97);Filobasidiales{order}(97);Filobasidiaceae{family}(97);Naganishia{genus}(97);Naganishia_globosa{species}(97)	Fungi	Basidiomycota	Tremellomycetes	Filobasidiales	Filobasidiaceae	Naganishia	Naganishia_globosa
ASV1618	9	0	0	0	0	0	0	0	0	0	0	0	0	0	0	9	Fungi{superkingdom}(99);Ascomycota{phylum}(99);Sordariomycetes{class}(99);Myrmecridiales{order}(99);Myrmecridiaceae{family}(99);Myrmecridium{genus}(99);Myrmecridium_schulzeri{species}(99)	Fungi	Ascomycota	Sordariomycetes	Myrmecridiales	Myrmecridiaceae	Myrmecridium	Myrmecridium_schulzeri
ASV1619	0	0	0	0	0	0	0	0	0	0	18	0	0	0	11	29	Fungi{superkingdom}(93);unidentified{phylum}(93);unidentified{class}(93);unidentified{order}(93);unidentified{family}(93);unidentified{genus}(93);unidentified{species}(93)	Fungi	unidentified	unidentified	unidentified	unidentified	unidentified	unidentified
ASV1620	0	0	20	0	0	0	0	0	0	0	0	0	0	0	0	20	Fungi{superkingdom}(65);Basidiomycota{phylum}(65);Agaricomycetes{class}(65);Cantharellales{order}(65);Ceratobasidiaceae{family}(65);unidentified{genus}(65);unidentified{species}(65)	Fungi	Basidiomycota	Agaricomycetes	Cantharellales	Ceratobasidiaceae	unidentified	unidentified
ASV1622	0	0	0	0	0	0	0	0	0	0	0	0	0	11	0	11	Fungi{superkingdom}(100);Ascomycota{phylum}(100);Dothideomycetes{class}(100);Pleosporales{order}(100);Pleosporaceae{family}(100);Comoclathris{genus}(100);unidentified{species}(100)	Fungi	Ascomycota	Dothideomycetes	Pleosporales	Pleosporaceae	Comoclathris	unidentified
ASV1623	0	0	0	0	0	0	0	0	366	0	0	0	0	0	0	366	Fungi{superkingdom}(71);Ascomycota{phylum}(71);Unassigned{class}(0);Unassigned{order}(0);Unassigned{family}(0);Unassigned{genus}(0);Unassigned{species}(0)	Fungi	Ascomycota	Unassigned	Unassigned	Unassigned	Unassigned	Unassigned
ASV1627	0	15	12	0	0	0	0	0	0	0	0	0	0	0	0	27	Fungi{superkingdom}(98);Ascomycota{phylum}(98);Sordariomycetes{class}(98);Xylariales{order}(98);Xylariales_fam_Incertae_sedis{family}(98);Phialemoniopsis{genus}(98);Phialemoniopsis_curvata{species}(98)	Fungi	Ascomycota	Sordariomycetes	Xylariales	Xylariales_fam_Incertae_sedis	Phialemoniopsis	Phialemoniopsis_curvata
ASV1628	0	0	0	0	0	0	0	0	0	10	0	0	0	0	0	10	Fungi{superkingdom}(100);Ascomycota{phylum}(100);Dothideomycetes{class}(100);Pleosporales{order}(100);Unassigned{family}(0);Unassigned{genus}(0);Unassigned{species}(0)	Fungi	Ascomycota	Dothideomycetes	Pleosporales	Unassigned	Unassigned	Unassigned
ASV1633	0	0	0	0	0	0	5	0	0	0	0	0	0	0	0	5	Fungi{superkingdom}(76);unidentified{phylum}(76);unidentified{class}(76);unidentified{order}(76);unidentified{family}(76);unidentified{genus}(76);unidentified{species}(76)	Fungi	unidentified	unidentified	unidentified	unidentified	unidentified	unidentified
ASV1636	0	0	0	0	0	0	0	0	0	0	0	10	0	0	0	10	Fungi{superkingdom}(73);unidentified{phylum}(73);unidentified{class}(73);unidentified{order}(73);unidentified{family}(73);unidentified{genus}(73);unidentified{species}(73)	Fungi	unidentified	unidentified	unidentified	unidentified	unidentified	unidentified
ASV1639	0	0	0	0	0	19	0	0	0	0	0	0	0	0	0	19	Fungi{superkingdom}(86);Ascomycota{phylum}(86);Sordariomycetes{class}(86);unidentified{order}(86);unidentified{family}(86);unidentified{genus}(86);unidentified{species}(86)	Fungi	Ascomycota	Sordariomycetes	unidentified	unidentified	unidentified	unidentified
ASV1640	0	0	0	0	0	0	0	0	0	8	0	0	0	0	0	8	Fungi{superkingdom}(100);Ascomycota{phylum}(100);Arthoniomycetes{class}(100);Lichenostigmatales{order}(100);Phaeococcomycetaceae{family}(100);Phaeococcomyces{genus}(100);unidentified{species}(100)	Fungi	Ascomycota	Arthoniomycetes	Lichenostigmatales	Phaeococcomycetaceae	Phaeococcomyces	unidentified
ASV1642	0	7	0	0	0	0	0	0	0	0	0	0	0	0	0	7	Fungi{superkingdom}(63);unidentified{phylum}(63);unidentified{class}(63);unidentified{order}(63);unidentified{family}(63);unidentified{genus}(63);unidentified{species}(63)	Fungi	unidentified	unidentified	unidentified	unidentified	unidentified	unidentified
ASV1643	0	0	0	0	33	0	0	0	0	0	0	0	0	0	0	33	Fungi{superkingdom}(100);Ascomycota{phylum}(100);Sordariomycetes{class}(100);Microascales{order}(100);Microascaceae{family}(100);Microascus{genus}(100);Unassigned{species}(0)	Fungi	Ascomycota	Sordariomycetes	Microascales	Microascaceae	Microascus	Unassigned
ASV1646	0	0	0	0	0	19	0	29	0	0	0	0	0	0	0	48	Fungi{superkingdom}(71);Basidiomycota{phylum}(71);Agaricomycetes{class}(71);Cantharellales{order}(71);Ceratobasidiaceae{family}(71);Thanatephorus{genus}(71);Thanatephorus_cucumeris{species}(71)	Fungi	Basidiomycota	Agaricomycetes	Cantharellales	Ceratobasidiaceae	Thanatephorus	Thanatephorus_cucumeris
ASV1647	0	0	0	0	0	0	0	0	0	0	0	23	0	0	0	23	Fungi{superkingdom}(100);Unassigned{phylum}(0);Unassigned{class}(0);Unassigned{order}(0);Unassigned{family}(0);Unassigned{genus}(0);Unassigned{species}(0)	Fungi	Unassigned	Unassigned	Unassigned	Unassigned	Unassigned	Unassigned
ASV1650	0	0	0	0	0	0	0	0	0	0	0	0	0	10	0	10	Fungi{superkingdom}(61);Basidiomycota{phylum}(61);Agaricomycetes{class}(61);Unassigned{order}(0);Unassigned{family}(0);Unassigned{genus}(0);Unassigned{species}(0)	Fungi	Basidiomycota	Agaricomycetes	Unassigned	Unassigned	Unassigned	Unassigned
ASV1654	0	0	0	0	0	0	0	0	0	0	0	95	0	0	0	95	Fungi{superkingdom}(100);Basidiomycota{phylum}(100);Agaricomycetes{class}(100);Agaricales{order}(100);Psathyrellaceae{family}(100);Coprinopsis{genus}(100);Coprinopsis_rugosobispora{species}(100)	Fungi	Basidiomycota	Agaricomycetes	Agaricales	Psathyrellaceae	Coprinopsis	Coprinopsis_rugosobispora
ASV1655	0	36	0	0	0	0	0	0	0	0	0	0	0	0	0	36	Fungi{superkingdom}(72);Basidiomycota{phylum}(72);Agaricomycetes{class}(72);Agaricales{order}(72);unidentified{family}(72);unidentified{genus}(72);unidentified{species}(72)	Fungi	Basidiomycota	Agaricomycetes	Agaricales	unidentified	unidentified	unidentified
ASV1656	0	0	0	0	0	0	0	0	0	0	0	0	0	18	0	18	Fungi{superkingdom}(95);Ascomycota{phylum}(95);Eurotiomycetes{class}(95);Chaetothyriales{order}(95);unidentified{family}(95);unidentified{genus}(95);unidentified{species}(95)	Fungi	Ascomycota	Eurotiomycetes	Chaetothyriales	unidentified	unidentified	unidentified
ASV1658	0	0	0	0	0	0	0	0	0	0	0	84	0	0	0	84	Fungi{superkingdom}(68);Basidiomycota{phylum}(68);Agaricomycetes{class}(68);unidentified{order}(68);unidentified{family}(68);unidentified{genus}(68);unidentified{species}(68)	Fungi	Basidiomycota	Agaricomycetes	unidentified	unidentified	unidentified	unidentified
ASV1660	0	35	0	0	0	0	0	0	0	0	0	0	0	0	0	35	Fungi{superkingdom}(100);Unassigned{phylum}(0);Unassigned{class}(0);Unassigned{order}(0);Unassigned{family}(0);Unassigned{genus}(0);Unassigned{species}(0)	Fungi	Unassigned	Unassigned	Unassigned	Unassigned	Unassigned	Unassigned
ASV1662	0	0	28	0	0	0	0	0	0	0	0	0	0	0	0	28	Fungi{superkingdom}(97);unidentified{phylum}(97);unidentified{class}(97);unidentified{order}(97);unidentified{family}(97);unidentified{genus}(97);unidentified{species}(97)	Fungi	unidentified	unidentified	unidentified	unidentified	unidentified	unidentified
ASV1668	0	0	0	0	0	0	19	0	0	0	0	0	0	0	0	19	Fungi{superkingdom}(78);Ascomycota{phylum}(78);Leotiomycetes{class}(78);Helotiales{order}(78);Unassigned{family}(0);Unassigned{genus}(0);Unassigned{species}(0)	Fungi	Ascomycota	Leotiomycetes	Helotiales	Unassigned	Unassigned	Unassigned
ASV1671	0	0	0	0	0	0	0	0	0	0	0	0	0	43	0	43	Fungi{superkingdom}(68);Ascomycota{phylum}(68);Eurotiomycetes{class}(68);Chaetothyriales{order}(68);Trichomeriaceae{family}(68);Knufia{genus}(68);Unassigned{species}(0)	Fungi	Ascomycota	Eurotiomycetes	Chaetothyriales	Trichomeriaceae	Knufia	Unassigned
ASV1673	0	0	0	0	0	0	0	80	0	0	0	0	0	0	0	80	Fungi{superkingdom}(68);unidentified{phylum}(68);unidentified{class}(68);unidentified{order}(68);unidentified{family}(68);unidentified{genus}(68);unidentified{species}(68)	Fungi	unidentified	unidentified	unidentified	unidentified	unidentified	unidentified
ASV1674	0	0	0	0	0	0	0	0	35	0	0	0	0	0	0	35	Fungi{superkingdom}(92);Basidiomycota{phylum}(92);Cystobasidiomycetes{class}(92);Cystobasidiales{order}(92);Cystobasidiaceae{family}(92);Cystobasidium{genus}(92);Cystobasidium_lysinophilum{species}(92)	Fungi	Basidiomycota	Cystobasidiomycetes	Cystobasidiales	Cystobasidiaceae	Cystobasidium	Cystobasidium_lysinophilum
ASV1676	0	0	0	0	0	0	0	0	0	120	0	0	0	0	0	120	Fungi{superkingdom}(77);Chytridiomycota{phylum}(77);Chytridiomycetes{class}(77);Chytridiales{order}(77);Chytridiaceae{family}(77);unidentified{genus}(77);unidentified{species}(77)	Fungi	Chytridiomycota	Chytridiomycetes	Chytridiales	Chytridiaceae	unidentified	unidentified
ASV1682	0	0	0	6	0	0	0	0	0	0	0	0	0	0	0	6	Fungi{superkingdom}(100);Unassigned{phylum}(0);Unassigned{class}(0);Unassigned{order}(0);Unassigned{family}(0);Unassigned{genus}(0);Unassigned{species}(0)	Fungi	Unassigned	Unassigned	Unassigned	Unassigned	Unassigned	Unassigned
ASV1684	23	0	0	0	0	0	0	0	0	0	0	0	0	21	0	44	Fungi{superkingdom}(99);Ascomycota{phylum}(99);Sordariomycetes{class}(99);Glomerellales{order}(99);Plectosphaerellaceae{family}(99);Plectosphaerella{genus}(99);Unassigned{species}(0)	Fungi	Ascomycota	Sordariomycetes	Glomerellales	Plectosphaerellaceae	Plectosphaerella	Unassigned
ASV1685	0	0	0	0	0	0	0	0	0	0	24	0	0	0	0	24	Fungi{superkingdom}(81);unidentified{phylum}(81);unidentified{class}(81);unidentified{order}(81);unidentified{family}(81);unidentified{genus}(81);unidentified{species}(81)	Fungi	unidentified	unidentified	unidentified	unidentified	unidentified	unidentified
ASV1692	0	0	0	0	0	0	8	0	34	0	0	0	0	0	0	42	Fungi{superkingdom}(86);Ascomycota{phylum}(86);Sordariomycetes{class}(86);Glomerellales{order}(86);Glomerellaceae{family}(86);Colletotrichum{genus}(86);Colletotrichum_verruculosum{species}(86)	Fungi	Ascomycota	Sordariomycetes	Glomerellales	Glomerellaceae	Colletotrichum	Colletotrichum_verruculosum
ASV1693	0	0	0	0	0	0	12	0	0	0	0	0	0	0	0	12	Fungi{superkingdom}(80);Basidiomycota{phylum}(80);Agaricomycetes{class}(80);Agaricales{order}(80);Agaricaceae{family}(80);Unassigned{genus}(0);Unassigned{species}(0)	Fungi	Basidiomycota	Agaricomycetes	Agaricales	Agaricaceae	Unassigned	Unassigned
ASV1697	0	0	83	0	0	0	0	0	0	0	0	0	0	0	0	83	Fungi{superkingdom}(69);Basidiomycota{phylum}(69);Agaricomycetes{class}(69);unidentified{order}(69);unidentified{family}(69);unidentified{genus}(69);unidentified{species}(69)	Fungi	Basidiomycota	Agaricomycetes	unidentified	unidentified	unidentified	unidentified
ASV1699	0	167	0	0	0	0	0	0	0	104	0	0	0	0	0	271	Fungi{superkingdom}(77);Ascomycota{phylum}(77);Eurotiomycetes{class}(77);Chaetothyriales{order}(77);unidentified{family}(77);unidentified{genus}(77);unidentified{species}(77)	Fungi	Ascomycota	Eurotiomycetes	Chaetothyriales	unidentified	unidentified	unidentified
ASV1700	0	0	0	0	0	0	0	13	0	0	0	0	0	0	0	13	Fungi{superkingdom}(98);unidentified{phylum}(98);unidentified{class}(98);unidentified{order}(98);unidentified{family}(98);unidentified{genus}(98);unidentified{species}(98)	Fungi	unidentified	unidentified	unidentified	unidentified	unidentified	unidentified
ASV1701	0	0	0	0	0	0	0	0	21	0	0	0	0	0	0	21	Fungi{superkingdom}(100);Chytridiomycota{phylum}(100);Rhizophlyctidomycetes{class}(100);Rhizophlyctidales{order}(100);Rhizophlyctidaceae{family}(100);Rhizophlyctis{genus}(100);unidentified{species}(100)	Fungi	Chytridiomycota	Rhizophlyctidomycetes	Rhizophlyctidales	Rhizophlyctidaceae	Rhizophlyctis	unidentified
ASV1702	0	0	0	0	0	27	0	0	0	0	0	0	0	0	0	27	Fungi{superkingdom}(90);Mortierellomycota{phylum}(90);Mortierellomycetes{class}(90);Mortierellales{order}(90);Mortierellaceae{family}(90);Mortierella{genus}(90);Mortierella_polygonia{species}(90)	Fungi	Mortierellomycota	Mortierellomycetes	Mortierellales	Mortierellaceae	Mortierella	Mortierella_polygonia
ASV1703	0	0	0	0	0	0	0	0	0	8	0	34	0	0	0	42	Fungi{superkingdom}(100);Unassigned{phylum}(0);Unassigned{class}(0);Unassigned{order}(0);Unassigned{family}(0);Unassigned{genus}(0);Unassigned{species}(0)	Fungi	Unassigned	Unassigned	Unassigned	Unassigned	Unassigned	Unassigned
ASV1708	0	0	0	0	48	0	0	0	0	0	0	0	0	0	0	48	Fungi{superkingdom}(62);Ascomycota{phylum}(62);Sordariomycetes{class}(62);Hypocreales{order}(62);Unassigned{family}(0);Unassigned{genus}(0);Unassigned{species}(0)	Fungi	Ascomycota	Sordariomycetes	Hypocreales	Unassigned	Unassigned	Unassigned
ASV1712	0	0	0	0	0	0	0	0	0	0	2	178	0	19	13	212	Fungi{superkingdom}(100);Unassigned{phylum}(0);Unassigned{class}(0);Unassigned{order}(0);Unassigned{family}(0);Unassigned{genus}(0);Unassigned{species}(0)	Fungi	Unassigned	Unassigned	Unassigned	Unassigned	Unassigned	Unassigned
ASV1713	0	0	0	0	5	0	0	0	0	0	0	0	0	0	0	5	Fungi{superkingdom}(99);Ascomycota{phylum}(99);Arthoniomycetes{class}(99);Lichenostigmatales{order}(99);Phaeococcomycetaceae{family}(99);Phaeococcomyces{genus}(99);unidentified{species}(99)	Fungi	Ascomycota	Arthoniomycetes	Lichenostigmatales	Phaeococcomycetaceae	Phaeococcomyces	unidentified
ASV1714	0	0	0	0	0	0	19	0	32	0	0	0	35	0	0	86	Fungi{superkingdom}(96);unidentified{phylum}(96);unidentified{class}(96);unidentified{order}(96);unidentified{family}(96);unidentified{genus}(96);unidentified{species}(96)	Fungi	unidentified	unidentified	unidentified	unidentified	unidentified	unidentified
ASV1723	0	0	0	0	0	0	0	0	0	0	0	0	20	0	0	20	Fungi{superkingdom}(68);unidentified{phylum}(68);unidentified{class}(68);unidentified{order}(68);unidentified{family}(68);unidentified{genus}(68);unidentified{species}(68)	Fungi	unidentified	unidentified	unidentified	unidentified	unidentified	unidentified
ASV1725	0	44	0	0	0	0	0	0	0	0	0	0	0	0	0	44	Fungi{superkingdom}(100);Ascomycota{phylum}(100);Pezizomycetes{class}(100);Pezizales{order}(100);Pezizaceae{family}(100);Mattirolomyces{genus}(100);Mattirolomyces_terfezioides{species}(100)	Fungi	Ascomycota	Pezizomycetes	Pezizales	Pezizaceae	Mattirolomyces	Mattirolomyces_terfezioides
ASV1727	8	0	0	0	0	0	0	0	0	0	0	0	0	0	0	8	Fungi{superkingdom}(65);unidentified{phylum}(65);unidentified{class}(65);unidentified{order}(65);unidentified{family}(65);unidentified{genus}(65);unidentified{species}(65)	Fungi	unidentified	unidentified	unidentified	unidentified	unidentified	unidentified
ASV1730	0	0	0	0	0	0	0	0	0	16	0	0	0	0	0	16	Fungi{superkingdom}(99);unidentified{phylum}(99);unidentified{class}(99);unidentified{order}(99);unidentified{family}(99);unidentified{genus}(99);unidentified{species}(99)	Fungi	unidentified	unidentified	unidentified	unidentified	unidentified	unidentified
ASV1731	6	0	0	0	0	0	0	0	0	0	6	0	0	0	13	25	Fungi{superkingdom}(96);unidentified{phylum}(96);unidentified{class}(96);unidentified{order}(96);unidentified{family}(96);unidentified{genus}(96);unidentified{species}(96)	Fungi	unidentified	unidentified	unidentified	unidentified	unidentified	unidentified
ASV1739	5	0	0	0	0	0	0	22	0	0	0	0	0	0	21	48	Fungi{superkingdom}(94);Ascomycota{phylum}(94);Sordariomycetes{class}(94);Sordariales{order}(94);Lasiosphaeriaceae{family}(94);Podospora{genus}(94);Podospora_unicaudata{species}(94)	Fungi	Ascomycota	Sordariomycetes	Sordariales	Lasiosphaeriaceae	Podospora	Podospora_unicaudata
ASV1740	0	0	0	0	0	0	0	0	0	0	0	0	0	30	0	30	Fungi{superkingdom}(100);Unassigned{phylum}(0);Unassigned{class}(0);Unassigned{order}(0);Unassigned{family}(0);Unassigned{genus}(0);Unassigned{species}(0)	Fungi	Unassigned	Unassigned	Unassigned	Unassigned	Unassigned	Unassigned
ASV1746	6	0	0	0	0	0	0	11	0	0	0	0	0	0	0	17	Fungi{superkingdom}(93);unidentified{phylum}(93);unidentified{class}(93);unidentified{order}(93);unidentified{family}(93);unidentified{genus}(93);unidentified{species}(93)	Fungi	unidentified	unidentified	unidentified	unidentified	unidentified	unidentified
ASV1748	0	0	0	0	0	0	0	0	17	0	0	0	0	0	0	17	Fungi{superkingdom}(64);Basidiomycota{phylum}(64);Agaricomycetes{class}(64);Unassigned{order}(0);Unassigned{family}(0);Unassigned{genus}(0);Unassigned{species}(0)	Fungi	Basidiomycota	Agaricomycetes	Unassigned	Unassigned	Unassigned	Unassigned
ASV1752	0	0	0	0	0	0	0	0	28	0	0	0	0	0	0	28	Fungi{superkingdom}(97);Ascomycota{phylum}(97);Dothideomycetes{class}(97);Pleosporales{order}(97);Sporormiaceae{family}(97);Preussia{genus}(97);Preussia_flanaganii{species}(97)	Fungi	Ascomycota	Dothideomycetes	Pleosporales	Sporormiaceae	Preussia	Preussia_flanaganii
ASV1755	0	0	0	0	2	0	0	0	0	0	0	0	0	0	0	2	Fungi{superkingdom}(98);Ascomycota{phylum}(98);Dothideomycetes{class}(98);Pleosporales{order}(98);Pleosporaceae{family}(98);Unassigned{genus}(0);Unassigned{species}(0)	Fungi	Ascomycota	Dothideomycetes	Pleosporales	Pleosporaceae	Unassigned	Unassigned
ASV1757	0	36	0	0	0	0	0	0	0	0	0	0	0	0	0	36	Fungi{superkingdom}(99);Basidiomycota{phylum}(99);Agaricomycetes{class}(99);Agaricales{order}(99);Stephanosporaceae{family}(99);Lindtneria{genus}(99);unidentified{species}(99)	Fungi	Basidiomycota	Agaricomycetes	Agaricales	Stephanosporaceae	Lindtneria	unidentified
ASV1758	0	249	0	0	0	0	0	0	0	0	0	0	0	6	0	255	Fungi{superkingdom}(94);Ascomycota{phylum}(94);Eurotiomycetes{class}(94);Chaetothyriales{order}(94);unidentified{family}(94);unidentified{genus}(94);unidentified{species}(94)	Fungi	Ascomycota	Eurotiomycetes	Chaetothyriales	unidentified	unidentified	unidentified
ASV1762	0	0	0	0	0	0	0	0	0	0	0	0	23	0	0	23	Fungi{superkingdom}(66);Basidiomycota{phylum}(66);Agaricomycetes{class}(66);Unassigned{order}(0);Unassigned{family}(0);Unassigned{genus}(0);Unassigned{species}(0)	Fungi	Basidiomycota	Agaricomycetes	Unassigned	Unassigned	Unassigned	Unassigned
ASV1768	0	0	0	0	0	0	0	0	0	32	0	0	0	0	0	32	Fungi{superkingdom}(100);Basidiomycota{phylum}(100);Agaricomycetes{class}(100);Agaricales{order}(100);Agaricaceae{family}(100);Agaricus{genus}(100);Agaricus_bisporus{species}(100)	Fungi	Basidiomycota	Agaricomycetes	Agaricales	Agaricaceae	Agaricus	Agaricus_bisporus
ASV1770	0	0	0	0	0	0	0	0	338	0	0	0	0	0	0	338	Fungi{superkingdom}(100);Ascomycota{phylum}(100);Eurotiomycetes{class}(100);Onygenales{order}(100);Onygenales_fam_Incertae_sedis{family}(100);Chrysosporium{genus}(100);Chrysosporium_lobatum{species}(100)	Fungi	Ascomycota	Eurotiomycetes	Onygenales	Onygenales_fam_Incertae_sedis	Chrysosporium	Chrysosporium_lobatum
ASV1772	0	30	0	0	0	0	0	48	0	0	0	0	0	0	0	78	Fungi{superkingdom}(62);Ascomycota{phylum}(62);Unassigned{class}(0);Unassigned{order}(0);Unassigned{family}(0);Unassigned{genus}(0);Unassigned{species}(0)	Fungi	Ascomycota	Unassigned	Unassigned	Unassigned	Unassigned	Unassigned
ASV1777	0	0	0	0	0	0	0	0	0	0	0	0	20	0	0	20	Fungi{superkingdom}(65);Basidiomycota{phylum}(65);Agaricomycetes{class}(65);Cantharellales{order}(65);Ceratobasidiaceae{family}(65);Thanatephorus{genus}(65);Thanatephorus_cucumeris{species}(65)	Fungi	Basidiomycota	Agaricomycetes	Cantharellales	Ceratobasidiaceae	Thanatephorus	Thanatephorus_cucumeris
ASV1781	0	0	0	0	0	12	0	0	0	0	0	0	0	0	0	12	Fungi{superkingdom}(100);Unassigned{phylum}(0);Unassigned{class}(0);Unassigned{order}(0);Unassigned{family}(0);Unassigned{genus}(0);Unassigned{species}(0)	Fungi	Unassigned	Unassigned	Unassigned	Unassigned	Unassigned	Unassigned
ASV1783	0	0	0	0	0	0	0	0	0	11	0	0	0	5	0	16	Fungi{superkingdom}(98);Ascomycota{phylum}(98);Dothideomycetes{class}(98);Botryosphaeriales{order}(98);Botryosphaeriaceae{family}(98);Macrophoma{genus}(98);unidentified{species}(98)	Fungi	Ascomycota	Dothideomycetes	Botryosphaeriales	Botryosphaeriaceae	Macrophoma	unidentified
ASV1788	0	173	0	0	0	0	0	0	0	11	0	0	0	0	0	184	Fungi{superkingdom}(100);Ascomycota{phylum}(100);Orbiliomycetes{class}(100);Orbiliales{order}(100);Orbiliaceae{family}(100);Brachyphoris{genus}(100);Brachyphoris_oviparasitica{species}(100)	Fungi	Ascomycota	Orbiliomycetes	Orbiliales	Orbiliaceae	Brachyphoris	Brachyphoris_oviparasitica
ASV1796	0	0	0	0	0	0	0	0	0	231	0	0	0	0	0	231	Fungi{superkingdom}(67);Ascomycota{phylum}(67);Unassigned{class}(0);Unassigned{order}(0);Unassigned{family}(0);Unassigned{genus}(0);Unassigned{species}(0)	Fungi	Ascomycota	Unassigned	Unassigned	Unassigned	Unassigned	Unassigned
ASV1797	0	0	0	0	0	0	0	22	0	0	0	10	0	26	0	58	Fungi{superkingdom}(64);Ascomycota{phylum}(64);Unassigned{class}(0);Unassigned{order}(0);Unassigned{family}(0);Unassigned{genus}(0);Unassigned{species}(0)	Fungi	Ascomycota	Unassigned	Unassigned	Unassigned	Unassigned	Unassigned
ASV1802	0	0	27	0	0	0	0	0	0	0	0	0	0	0	0	27	Fungi{superkingdom}(60);unidentified{phylum}(60);unidentified{class}(60);unidentified{order}(60);unidentified{family}(60);unidentified{genus}(60);unidentified{species}(60)	Fungi	unidentified	unidentified	unidentified	unidentified	unidentified	unidentified
ASV1804	0	97	0	0	0	27	0	0	0	0	42	0	0	19	0	185	Fungi{superkingdom}(75);Ascomycota{phylum}(75);Dothideomycetes{class}(75);Pleosporales{order}(75);Lophiostomataceae{family}(75);Lophiostoma{genus}(75);Lophiostoma_rosae{species}(75)	Fungi	Ascomycota	Dothideomycetes	Pleosporales	Lophiostomataceae	Lophiostoma	Lophiostoma_rosae
ASV1809	0	0	0	0	0	0	0	0	0	0	0	0	0	19	0	19	Fungi{superkingdom}(81);Ascomycota{phylum}(81);Sordariomycetes{class}(81);Hypocreales{order}(81);Nectriaceae{family}(81);Fusarium{genus}(81);Fusarium_penzigii{species}(81)	Fungi	Ascomycota	Sordariomycetes	Hypocreales	Nectriaceae	Fusarium	Fusarium_penzigii
ASV1810	0	0	0	0	0	0	0	5	0	0	0	0	0	0	0	5	Fungi{superkingdom}(94);unidentified{phylum}(94);unidentified{class}(94);unidentified{order}(94);unidentified{family}(94);unidentified{genus}(94);unidentified{species}(94)	Fungi	unidentified	unidentified	unidentified	unidentified	unidentified	unidentified
ASV1817	0	0	21	0	0	0	0	0	0	0	0	0	0	0	0	21	Fungi{superkingdom}(60);unidentified{phylum}(60);unidentified{class}(60);unidentified{order}(60);unidentified{family}(60);unidentified{genus}(60);unidentified{species}(60)	Fungi	unidentified	unidentified	unidentified	unidentified	unidentified	unidentified
ASV1824	0	0	0	0	0	0	0	0	0	0	0	0	0	0	40	40	Fungi{superkingdom}(100);Unassigned{phylum}(0);Unassigned{class}(0);Unassigned{order}(0);Unassigned{family}(0);Unassigned{genus}(0);Unassigned{species}(0)	Fungi	Unassigned	Unassigned	Unassigned	Unassigned	Unassigned	Unassigned
ASV1830	0	0	14	0	0	0	0	0	0	0	0	0	0	0	0	14	Fungi{superkingdom}(100);Ascomycota{phylum}(100);Sordariomycetes{class}(100);Microascales{order}(100);Microascaceae{family}(100);Kernia{genus}(100);Kernia_geniculotricha{species}(100)	Fungi	Ascomycota	Sordariomycetes	Microascales	Microascaceae	Kernia	Kernia_geniculotricha
ASV1832	0	0	0	0	83	0	0	0	0	0	0	0	11	0	0	94	Fungi{superkingdom}(96);unidentified{phylum}(96);unidentified{class}(96);unidentified{order}(96);unidentified{family}(96);unidentified{genus}(96);unidentified{species}(96)	Fungi	unidentified	unidentified	unidentified	unidentified	unidentified	unidentified
ASV1834	0	348	0	0	0	0	0	0	0	0	0	0	0	0	0	348	Fungi{superkingdom}(100);Unassigned{phylum}(0);Unassigned{class}(0);Unassigned{order}(0);Unassigned{family}(0);Unassigned{genus}(0);Unassigned{species}(0)	Fungi	Unassigned	Unassigned	Unassigned	Unassigned	Unassigned	Unassigned
ASV1840	0	0	0	0	0	0	39	0	0	0	0	0	0	0	0	39	Fungi{superkingdom}(100);Calcarisporiellomycota{phylum}(100);Calcarisporiellomycetes{class}(100);Calcarisporiellales{order}(100);Calcarisporiellaceae{family}(100);Calcarisporiella{genus}(100);unidentified{species}(100)	Fungi	Calcarisporiellomycota	Calcarisporiellomycetes	Calcarisporiellales	Calcarisporiellaceae	Calcarisporiella	unidentified
ASV1841	24	0	0	0	0	0	0	0	0	0	0	0	0	0	0	24	Fungi{superkingdom}(100);Unassigned{phylum}(0);Unassigned{class}(0);Unassigned{order}(0);Unassigned{family}(0);Unassigned{genus}(0);Unassigned{species}(0)	Fungi	Unassigned	Unassigned	Unassigned	Unassigned	Unassigned	Unassigned
ASV1842	0	0	0	0	0	0	0	0	0	0	0	0	0	345	0	345	Fungi{superkingdom}(100);Unassigned{phylum}(0);Unassigned{class}(0);Unassigned{order}(0);Unassigned{family}(0);Unassigned{genus}(0);Unassigned{species}(0)	Fungi	Unassigned	Unassigned	Unassigned	Unassigned	Unassigned	Unassigned
ASV1843	0	0	0	0	0	0	0	0	0	0	5	0	0	0	0	5	Fungi{superkingdom}(100);Ascomycota{phylum}(100);Eurotiomycetes{class}(100);Verrucariales{order}(100);Verrucariaceae{family}(100);Endocarpon{genus}(100);Unassigned{species}(0)	Fungi	Ascomycota	Eurotiomycetes	Verrucariales	Verrucariaceae	Endocarpon	Unassigned
ASV1847	0	0	0	0	0	0	0	0	0	0	0	0	0	0	10	10	Fungi{superkingdom}(62);unidentified{phylum}(62);unidentified{class}(62);unidentified{order}(62);unidentified{family}(62);unidentified{genus}(62);unidentified{species}(62)	Fungi	unidentified	unidentified	unidentified	unidentified	unidentified	unidentified
ASV1854	0	0	0	0	0	0	0	0	0	0	0	0	46	0	0	46	Fungi{superkingdom}(62);Ascomycota{phylum}(62);Sordariomycetes{class}(62);Xylariales{order}(62);Microdochiaceae{family}(62);Gyrothrix{genus}(62);Gyrothrix_verticiclada{species}(62)	Fungi	Ascomycota	Sordariomycetes	Xylariales	Microdochiaceae	Gyrothrix	Gyrothrix_verticiclada
ASV1855	0	0	0	0	0	22	0	0	0	0	0	0	47	14	0	83	Fungi{superkingdom}(87);unidentified{phylum}(87);unidentified{class}(87);unidentified{order}(87);unidentified{family}(87);unidentified{genus}(87);unidentified{species}(87)	Fungi	unidentified	unidentified	unidentified	unidentified	unidentified	unidentified
ASV1857	0	0	0	0	0	0	0	0	0	0	0	13	0	0	0	13	Fungi{superkingdom}(100);Unassigned{phylum}(0);Unassigned{class}(0);Unassigned{order}(0);Unassigned{family}(0);Unassigned{genus}(0);Unassigned{species}(0)	Fungi	Unassigned	Unassigned	Unassigned	Unassigned	Unassigned	Unassigned
ASV1863	0	0	0	0	0	0	0	0	0	184	0	0	0	0	0	184	Fungi{superkingdom}(100);Ascomycota{phylum}(100);Leotiomycetes{class}(100);Helotiales{order}(100);Helotiales_fam_Incertae_sedis{family}(100);Cadophora{genus}(100);Cadophora_malorum{species}(100)	Fungi	Ascomycota	Leotiomycetes	Helotiales	Helotiales_fam_Incertae_sedis	Cadophora	Cadophora_malorum
ASV1865	0	0	0	0	0	0	0	0	0	0	8	0	0	0	0	8	Fungi{superkingdom}(100);Ascomycota{phylum}(100);Sordariomycetes{class}(100);Microascales{order}(100);Microascaceae{family}(100);Mycochlamys{genus}(100);Mycochlamys_macrospora{species}(100)	Fungi	Ascomycota	Sordariomycetes	Microascales	Microascaceae	Mycochlamys	Mycochlamys_macrospora
ASV1868	0	0	0	0	28	0	0	0	0	0	0	0	0	0	0	28	Fungi{superkingdom}(62);Basidiomycota{phylum}(62);Agaricomycetes{class}(62);Unassigned{order}(0);Unassigned{family}(0);Unassigned{genus}(0);Unassigned{species}(0)	Fungi	Basidiomycota	Agaricomycetes	Unassigned	Unassigned	Unassigned	Unassigned
ASV1869	0	0	0	0	0	0	16	0	0	0	0	74	0	0	0	90	Fungi{superkingdom}(100);Ascomycota{phylum}(100);Sordariomycetes{class}(100);Sordariales{order}(100);Chaetomiaceae{family}(100);Humicola{genus}(100);Humicola_nigrescens{species}(100)	Fungi	Ascomycota	Sordariomycetes	Sordariales	Chaetomiaceae	Humicola	Humicola_nigrescens
ASV1878	0	321	0	0	0	0	0	0	0	0	0	0	0	0	0	321	Fungi{superkingdom}(96);Ascomycota{phylum}(96);Sordariomycetes{class}(96);Hypocreales{order}(96);Hypocreaceae{family}(96);Trichoderma{genus}(96);Trichoderma_lixii{species}(96)	Fungi	Ascomycota	Sordariomycetes	Hypocreales	Hypocreaceae	Trichoderma	Trichoderma_lixii
ASV1880	0	0	0	0	0	0	0	0	0	0	0	0	0	334	0	334	Fungi{superkingdom}(65);unidentified{phylum}(65);unidentified{class}(65);unidentified{order}(65);unidentified{family}(65);unidentified{genus}(65);unidentified{species}(65)	Fungi	unidentified	unidentified	unidentified	unidentified	unidentified	unidentified
ASV1882	0	0	0	0	0	0	0	0	0	184	0	0	0	0	0	184	Fungi{superkingdom}(93);unidentified{phylum}(93);unidentified{class}(93);unidentified{order}(93);unidentified{family}(93);unidentified{genus}(93);unidentified{species}(93)	Fungi	unidentified	unidentified	unidentified	unidentified	unidentified	unidentified
ASV1883	0	0	0	0	0	0	0	0	0	0	0	38	0	0	0	38	Fungi{superkingdom}(100);Basidiomycota{phylum}(100);Agaricomycetes{class}(100);Sebacinales{order}(100);Sebacinaceae{family}(100);Paulisebacina{genus}(100);Paulisebacina_allantoidea{species}(100)	Fungi	Basidiomycota	Agaricomycetes	Sebacinales	Sebacinaceae	Paulisebacina	Paulisebacina_allantoidea
ASV1884	0	0	0	0	0	0	0	0	0	175	0	0	0	0	0	175	Fungi{superkingdom}(100);Ascomycota{phylum}(100);Dothideomycetes{class}(100);Botryosphaeriales{order}(100);Aplosporellaceae{family}(100);Aplosporella{genus}(100);Unassigned{species}(0)	Fungi	Ascomycota	Dothideomycetes	Botryosphaeriales	Aplosporellaceae	Aplosporella	Unassigned
ASV1885	0	0	0	0	0	0	0	0	0	162	0	0	0	0	0	162	Fungi{superkingdom}(82);Ascomycota{phylum}(82);Unassigned{class}(0);Unassigned{order}(0);Unassigned{family}(0);Unassigned{genus}(0);Unassigned{species}(0)	Fungi	Ascomycota	Unassigned	Unassigned	Unassigned	Unassigned	Unassigned
ASV1896	70	0	0	0	0	0	0	0	46	0	0	0	0	0	0	116	Fungi{superkingdom}(100);Ascomycota{phylum}(100);Sordariomycetes{class}(100);Myrmecridiales{order}(100);Myrmecridiaceae{family}(100);Myrmecridium{genus}(100);Myrmecridium_thailandicum{species}(100)	Fungi	Ascomycota	Sordariomycetes	Myrmecridiales	Myrmecridiaceae	Myrmecridium	Myrmecridium_thailandicum
ASV1897	0	0	0	6	0	0	0	0	0	0	0	0	0	0	0	6	Fungi{superkingdom}(99);Ascomycota{phylum}(99);Eurotiomycetes{class}(99);Chaetothyriales{order}(99);unidentified{family}(99);unidentified{genus}(99);unidentified{species}(99)	Fungi	Ascomycota	Eurotiomycetes	Chaetothyriales	unidentified	unidentified	unidentified
ASV1903	0	0	21	0	0	0	0	0	0	0	0	0	0	0	0	21	Fungi{superkingdom}(81);unidentified{phylum}(81);unidentified{class}(81);unidentified{order}(81);unidentified{family}(81);unidentified{genus}(81);unidentified{species}(81)	Fungi	unidentified	unidentified	unidentified	unidentified	unidentified	unidentified
ASV1912	0	0	0	0	0	0	0	0	0	0	0	17	0	0	0	17	Fungi{superkingdom}(93);unidentified{phylum}(93);unidentified{class}(93);unidentified{order}(93);unidentified{family}(93);unidentified{genus}(93);unidentified{species}(93)	Fungi	unidentified	unidentified	unidentified	unidentified	unidentified	unidentified
ASV1913	0	0	0	0	0	0	0	0	0	0	0	0	97	0	0	97	Fungi{superkingdom}(88);Chytridiomycota{phylum}(88);unidentified{class}(88);unidentified{order}(88);unidentified{family}(88);unidentified{genus}(88);unidentified{species}(88)	Fungi	Chytridiomycota	unidentified	unidentified	unidentified	unidentified	unidentified
ASV1914	0	0	0	0	0	0	0	34	0	0	0	0	0	0	0	34	Fungi{superkingdom}(94);unidentified{phylum}(94);unidentified{class}(94);unidentified{order}(94);unidentified{family}(94);unidentified{genus}(94);unidentified{species}(94)	Fungi	unidentified	unidentified	unidentified	unidentified	unidentified	unidentified
ASV1915	0	0	0	14	0	0	0	0	0	33	0	0	0	0	0	47	Fungi{superkingdom}(100);Unassigned{phylum}(0);Unassigned{class}(0);Unassigned{order}(0);Unassigned{family}(0);Unassigned{genus}(0);Unassigned{species}(0)	Fungi	Unassigned	Unassigned	Unassigned	Unassigned	Unassigned	Unassigned
ASV1918	0	177	0	0	0	0	0	0	0	0	0	0	0	0	0	177	Fungi{superkingdom}(97);unidentified{phylum}(97);unidentified{class}(97);unidentified{order}(97);unidentified{family}(97);unidentified{genus}(97);unidentified{species}(97)	Fungi	unidentified	unidentified	unidentified	unidentified	unidentified	unidentified
ASV1926	0	51	0	0	0	0	0	0	0	0	0	0	0	0	0	51	Fungi{superkingdom}(81);Ascomycota{phylum}(81);Unassigned{class}(0);Unassigned{order}(0);Unassigned{family}(0);Unassigned{genus}(0);Unassigned{species}(0)	Fungi	Ascomycota	Unassigned	Unassigned	Unassigned	Unassigned	Unassigned
ASV1927	0	0	0	9	0	0	0	0	0	0	0	0	0	0	0	9	Fungi{superkingdom}(100);Ascomycota{phylum}(100);Eurotiomycetes{class}(100);Eurotiales{order}(100);Aspergillaceae{family}(100);Aspergillus{genus}(100);Aspergillus_protuberus{species}(100)	Fungi	Ascomycota	Eurotiomycetes	Eurotiales	Aspergillaceae	Aspergillus	Aspergillus_protuberus
ASV1933	0	0	0	0	0	18	0	0	0	0	0	0	0	0	0	18	Fungi{superkingdom}(100);Basidiomycota{phylum}(100);Tremellomycetes{class}(100);Filobasidiales{order}(100);Filobasidiaceae{family}(100);Filobasidium{genus}(100);Filobasidium_oeirense{species}(100)	Fungi	Basidiomycota	Tremellomycetes	Filobasidiales	Filobasidiaceae	Filobasidium	Filobasidium_oeirense
ASV1954	0	0	0	0	0	0	0	0	0	0	16	0	0	9	0	25	Fungi{superkingdom}(100);Unassigned{phylum}(0);Unassigned{class}(0);Unassigned{order}(0);Unassigned{family}(0);Unassigned{genus}(0);Unassigned{species}(0)	Fungi	Unassigned	Unassigned	Unassigned	Unassigned	Unassigned	Unassigned
ASV1959	151	0	0	0	0	0	0	0	0	0	0	0	0	0	0	151	Fungi{superkingdom}(100);Unassigned{phylum}(0);Unassigned{class}(0);Unassigned{order}(0);Unassigned{family}(0);Unassigned{genus}(0);Unassigned{species}(0)	Fungi	Unassigned	Unassigned	Unassigned	Unassigned	Unassigned	Unassigned
ASV1960	0	0	0	0	0	0	13	0	0	0	0	0	0	0	0	13	Fungi{superkingdom}(100);Ascomycota{phylum}(100);Dothideomycetes{class}(100);Pleosporales{order}(100);Sporormiaceae{family}(100);Sparticola{genus}(100);Sparticola_forlicesenae{species}(100)	Fungi	Ascomycota	Dothideomycetes	Pleosporales	Sporormiaceae	Sparticola	Sparticola_forlicesenae
ASV1965	0	0	0	0	0	0	0	0	0	0	16	0	0	0	0	16	Fungi{superkingdom}(100);Basidiomycota{phylum}(100);Agaricomycetes{class}(100);Agaricales{order}(100);Tricholomataceae{family}(100);Calyptella{genus}(100);Calyptella_capula{species}(100)	Fungi	Basidiomycota	Agaricomycetes	Agaricales	Tricholomataceae	Calyptella	Calyptella_capula
ASV1968	0	0	0	0	0	0	0	0	0	40	0	0	0	0	0	40	Fungi{superkingdom}(92);unidentified{phylum}(92);unidentified{class}(92);unidentified{order}(92);unidentified{family}(92);unidentified{genus}(92);unidentified{species}(92)	Fungi	unidentified	unidentified	unidentified	unidentified	unidentified	unidentified
ASV1983	0	0	0	0	0	0	0	0	0	0	17	0	0	0	0	17	Fungi{superkingdom}(100);Basidiomycota{phylum}(100);Agaricomycetes{class}(100);Agaricales{order}(100);Entolomataceae{family}(100);Entoloma{genus}(100);Entoloma_graphitipes_f._cystidiatum{species}(100)	Fungi	Basidiomycota	Agaricomycetes	Agaricales	Entolomataceae	Entoloma	Entoloma_graphitipes_f._cystidiatum
ASV1985	0	0	0	0	0	0	0	0	0	7	0	0	0	0	0	7	Fungi{superkingdom}(100);Unassigned{phylum}(0);Unassigned{class}(0);Unassigned{order}(0);Unassigned{family}(0);Unassigned{genus}(0);Unassigned{species}(0)	Fungi	Unassigned	Unassigned	Unassigned	Unassigned	Unassigned	Unassigned
ASV2000	6	0	0	5	5	0	0	0	0	0	0	0	0	0	0	16	Fungi{superkingdom}(100);Ascomycota{phylum}(100);Arthoniomycetes{class}(100);Lichenostigmatales{order}(100);Phaeococcomycetaceae{family}(100);Phaeococcomyces{genus}(100);unidentified{species}(100)	Fungi	Ascomycota	Arthoniomycetes	Lichenostigmatales	Phaeococcomycetaceae	Phaeococcomyces	unidentified
ASV2004	20	0	0	0	0	0	0	0	0	0	0	0	0	0	0	20	Fungi{superkingdom}(100);Ascomycota{phylum}(100);Eurotiomycetes{class}(100);Mycocaliciales{order}(100);Mycocaliciaceae{family}(100);Mycocalicium{genus}(100);Mycocalicium_victoriae{species}(100)	Fungi	Ascomycota	Eurotiomycetes	Mycocaliciales	Mycocaliciaceae	Mycocalicium	Mycocalicium_victoriae
ASV2006	0	0	0	0	0	13	0	0	0	0	0	0	0	0	0	13	Fungi{superkingdom}(61);unidentified{phylum}(61);unidentified{class}(61);unidentified{order}(61);unidentified{family}(61);unidentified{genus}(61);unidentified{species}(61)	Fungi	unidentified	unidentified	unidentified	unidentified	unidentified	unidentified
ASV2007	0	0	0	0	0	0	0	0	0	0	0	0	50	0	0	50	Fungi{superkingdom}(85);Basidiomycota{phylum}(85);Agaricomycetes{class}(85);Agaricales{order}(85);Agaricaceae{family}(85);Melanophyllum{genus}(85);Melanophyllum_haematospermum{species}(85)	Fungi	Basidiomycota	Agaricomycetes	Agaricales	Agaricaceae	Melanophyllum	Melanophyllum_haematospermum
ASV2011	0	0	0	0	0	0	0	0	0	0	0	0	66	0	0	66	Fungi{superkingdom}(61);Ascomycota{phylum}(61);Dothideomycetes{class}(61);Pleosporales{order}(61);Periconiaceae{family}(61);Periconia{genus}(61);Unassigned{species}(0)	Fungi	Ascomycota	Dothideomycetes	Pleosporales	Periconiaceae	Periconia	Unassigned
ASV2024	0	0	0	0	0	0	0	0	0	0	0	56	0	0	0	56	Fungi{superkingdom}(86);Ascomycota{phylum}(86);Sordariomycetes{class}(86);Xylariales{order}(86);Diatrypaceae{family}(86);Monosporascus{genus}(86);unidentified{species}(86)	Fungi	Ascomycota	Sordariomycetes	Xylariales	Diatrypaceae	Monosporascus	unidentified
ASV2030	0	0	0	0	3	0	0	0	0	0	0	0	0	0	0	3	Fungi{superkingdom}(100);Ascomycota{phylum}(100);Eurotiomycetes{class}(100);Eurotiales{order}(100);Aspergillaceae{family}(100);Aspergillus{genus}(100);Unassigned{species}(0)	Fungi	Ascomycota	Eurotiomycetes	Eurotiales	Aspergillaceae	Aspergillus	Unassigned
ASV2031	0	0	0	0	0	0	0	25	0	0	0	0	0	0	0	25	Fungi{superkingdom}(95);unidentified{phylum}(95);unidentified{class}(95);unidentified{order}(95);unidentified{family}(95);unidentified{genus}(95);unidentified{species}(95)	Fungi	unidentified	unidentified	unidentified	unidentified	unidentified	unidentified
ASV2033	0	0	0	0	0	0	0	0	0	0	0	32	0	0	0	32	Fungi{superkingdom}(82);Ascomycota{phylum}(82);Pezizomycetes{class}(82);Pezizales{order}(82);Ascodesmidaceae{family}(82);Unassigned{genus}(0);Unassigned{species}(0)	Fungi	Ascomycota	Pezizomycetes	Pezizales	Ascodesmidaceae	Unassigned	Unassigned
ASV2038	0	0	0	0	0	0	0	0	52	0	0	0	0	0	0	52	Fungi{superkingdom}(98);Ascomycota{phylum}(98);Dothideomycetes{class}(98);Pleosporales{order}(98);Sporormiaceae{family}(98);Preussia{genus}(98);Preussia_terricola{species}(98)	Fungi	Ascomycota	Dothideomycetes	Pleosporales	Sporormiaceae	Preussia	Preussia_terricola
ASV2042	0	0	0	0	0	0	0	32	0	0	0	0	0	0	0	32	Fungi{superkingdom}(78);Basidiomycota{phylum}(78);Agaricomycetes{class}(78);Agaricales{order}(78);Bolbitiaceae{family}(78);Conocybe{genus}(78);Conocybe_velutipes{species}(78)	Fungi	Basidiomycota	Agaricomycetes	Agaricales	Bolbitiaceae	Conocybe	Conocybe_velutipes
ASV2044	0	0	0	0	0	0	0	23	0	0	0	0	0	0	0	23	Fungi{superkingdom}(69);Ascomycota{phylum}(69);unidentified{class}(69);unidentified{order}(69);unidentified{family}(69);unidentified{genus}(69);unidentified{species}(69)	Fungi	Ascomycota	unidentified	unidentified	unidentified	unidentified	unidentified
ASV2048	0	0	0	0	0	0	0	0	0	0	0	43	0	0	0	43	Fungi{superkingdom}(98);unidentified{phylum}(98);unidentified{class}(98);unidentified{order}(98);unidentified{family}(98);unidentified{genus}(98);unidentified{species}(98)	Fungi	unidentified	unidentified	unidentified	unidentified	unidentified	unidentified
ASV2051	0	0	0	281	0	0	0	0	0	0	0	0	0	0	0	281	Fungi{superkingdom}(82);Glomeromycota{phylum}(82);Glomeromycetes{class}(82);Glomerales{order}(82);Glomeraceae{family}(82);Glomus{genus}(82);Glomus_aggregatum{species}(82)	Fungi	Glomeromycota	Glomeromycetes	Glomerales	Glomeraceae	Glomus	Glomus_aggregatum
ASV2054	0	0	0	0	0	0	0	0	42	0	0	0	0	0	0	42	Fungi{superkingdom}(87);Glomeromycota{phylum}(87);Glomeromycetes{class}(87);Glomerales{order}(87);Glomeraceae{family}(87);Glomus{genus}(87);Glomus_aggregatum{species}(87)	Fungi	Glomeromycota	Glomeromycetes	Glomerales	Glomeraceae	Glomus	Glomus_aggregatum
ASV2064	0	128	0	0	0	0	0	0	0	0	0	0	0	0	0	128	Fungi{superkingdom}(75);Ascomycota{phylum}(75);unidentified{class}(75);unidentified{order}(75);unidentified{family}(75);unidentified{genus}(75);unidentified{species}(75)	Fungi	Ascomycota	unidentified	unidentified	unidentified	unidentified	unidentified
ASV2066	0	0	0	0	15	0	0	0	0	0	0	0	0	0	0	15	Fungi{superkingdom}(69);Chytridiomycota{phylum}(69);unidentified{class}(69);unidentified{order}(69);unidentified{family}(69);unidentified{genus}(69);unidentified{species}(69)	Fungi	Chytridiomycota	unidentified	unidentified	unidentified	unidentified	unidentified
ASV2068	0	0	0	0	0	0	0	35	0	0	0	0	0	0	0	35	Fungi{superkingdom}(80);Ascomycota{phylum}(80);Dothideomycetes{class}(80);Pleosporales{order}(80);Unassigned{family}(0);Unassigned{genus}(0);Unassigned{species}(0)	Fungi	Ascomycota	Dothideomycetes	Pleosporales	Unassigned	Unassigned	Unassigned
ASV2080	0	0	0	4	0	0	0	0	0	0	0	0	0	0	0	4	Fungi{superkingdom}(100);Unassigned{phylum}(0);Unassigned{class}(0);Unassigned{order}(0);Unassigned{family}(0);Unassigned{genus}(0);Unassigned{species}(0)	Fungi	Unassigned	Unassigned	Unassigned	Unassigned	Unassigned	Unassigned
ASV2085	0	0	0	0	0	0	0	273	0	0	0	0	0	0	0	273	Fungi{superkingdom}(100);Ascomycota{phylum}(100);Sordariomycetes{class}(100);Hypocreales{order}(100);Stachybotryaceae{family}(100);Stachybotrys{genus}(100);Stachybotrys_microspora{species}(100)	Fungi	Ascomycota	Sordariomycetes	Hypocreales	Stachybotryaceae	Stachybotrys	Stachybotrys_microspora
ASV2096	0	0	0	0	0	0	0	0	0	0	0	0	0	0	160	160	Fungi{superkingdom}(100);Unassigned{phylum}(0);Unassigned{class}(0);Unassigned{order}(0);Unassigned{family}(0);Unassigned{genus}(0);Unassigned{species}(0)	Fungi	Unassigned	Unassigned	Unassigned	Unassigned	Unassigned	Unassigned
ASV2102	0	0	0	0	0	0	0	42	0	0	0	0	0	0	0	42	Fungi{superkingdom}(97);unidentified{phylum}(97);unidentified{class}(97);unidentified{order}(97);unidentified{family}(97);unidentified{genus}(97);unidentified{species}(97)	Fungi	unidentified	unidentified	unidentified	unidentified	unidentified	unidentified
ASV2113	0	49	0	0	0	0	0	0	22	0	0	0	0	0	0	71	Fungi{superkingdom}(100);Basidiomycota{phylum}(100);Agaricomycetes{class}(100);Agaricales{order}(100);Agaricaceae{family}(100);Tulostoma{genus}(100);unidentified{species}(100)	Fungi	Basidiomycota	Agaricomycetes	Agaricales	Agaricaceae	Tulostoma	unidentified
ASV2114	0	0	0	0	0	0	0	0	0	0	27	0	0	0	0	27	Fungi{superkingdom}(100);Ascomycota{phylum}(100);Leotiomycetes{class}(100);Erysiphales{order}(100);Erysiphaceae{family}(100);Erysiphe{genus}(100);Erysiphe_astragali{species}(100)	Fungi	Ascomycota	Leotiomycetes	Erysiphales	Erysiphaceae	Erysiphe	Erysiphe_astragali
ASV2119	0	0	0	0	126	0	0	0	0	0	0	0	0	0	0	126	Fungi{superkingdom}(68);Glomeromycota{phylum}(68);Glomeromycetes{class}(68);Glomerales{order}(68);Glomeraceae{family}(68);Unassigned{genus}(0);Unassigned{species}(0)	Fungi	Glomeromycota	Glomeromycetes	Glomerales	Glomeraceae	Unassigned	Unassigned
ASV2132	0	0	0	0	22	27	0	0	0	0	0	0	0	0	0	49	Fungi{superkingdom}(76);Ascomycota{phylum}(76);Unassigned{class}(0);Unassigned{order}(0);Unassigned{family}(0);Unassigned{genus}(0);Unassigned{species}(0)	Fungi	Ascomycota	Unassigned	Unassigned	Unassigned	Unassigned	Unassigned
ASV2136	0	0	0	0	0	0	0	0	0	0	0	0	50	0	0	50	Fungi{superkingdom}(94);Glomeromycota{phylum}(94);Glomeromycetes{class}(94);Glomerales{order}(94);Glomeraceae{family}(94);Glomus{genus}(94);Glomus_aggregatum{species}(94)	Fungi	Glomeromycota	Glomeromycetes	Glomerales	Glomeraceae	Glomus	Glomus_aggregatum
ASV2137	0	0	0	0	0	0	0	0	0	0	0	192	0	0	0	192	Fungi{superkingdom}(69);Ascomycota{phylum}(69);Dothideomycetes{class}(69);Pleosporales{order}(69);Lophiostomataceae{family}(69);Lophiostoma{genus}(69);Unassigned{species}(0)	Fungi	Ascomycota	Dothideomycetes	Pleosporales	Lophiostomataceae	Lophiostoma	Unassigned
ASV2145	54	0	0	0	0	0	0	0	0	0	0	0	0	0	0	54	Fungi{superkingdom}(100);Unassigned{phylum}(0);Unassigned{class}(0);Unassigned{order}(0);Unassigned{family}(0);Unassigned{genus}(0);Unassigned{species}(0)	Fungi	Unassigned	Unassigned	Unassigned	Unassigned	Unassigned	Unassigned
ASV2156	0	0	0	0	0	0	0	107	0	103	0	0	0	0	0	210	Fungi{superkingdom}(68);unidentified{phylum}(68);unidentified{class}(68);unidentified{order}(68);unidentified{family}(68);unidentified{genus}(68);unidentified{species}(68)	Fungi	unidentified	unidentified	unidentified	unidentified	unidentified	unidentified
ASV2163	0	0	0	17	0	0	0	0	0	0	0	0	0	0	0	17	Fungi{superkingdom}(100);Unassigned{phylum}(0);Unassigned{class}(0);Unassigned{order}(0);Unassigned{family}(0);Unassigned{genus}(0);Unassigned{species}(0)	Fungi	Unassigned	Unassigned	Unassigned	Unassigned	Unassigned	Unassigned
ASV2164	0	0	0	0	0	0	0	0	0	0	0	0	0	27	0	27	Fungi{superkingdom}(97);unidentified{phylum}(97);unidentified{class}(97);unidentified{order}(97);unidentified{family}(97);unidentified{genus}(97);unidentified{species}(97)	Fungi	unidentified	unidentified	unidentified	unidentified	unidentified	unidentified
ASV2167	0	0	0	0	0	0	0	0	0	0	0	0	0	7	0	7	Fungi{superkingdom}(76);Ascomycota{phylum}(76);Sordariomycetes{class}(76);Sordariales{order}(76);Chaetomiaceae{family}(76);Stolonocarpus{genus}(76);Stolonocarpus_gigasporus{species}(76)	Fungi	Ascomycota	Sordariomycetes	Sordariales	Chaetomiaceae	Stolonocarpus	Stolonocarpus_gigasporus
ASV2171	0	0	0	0	0	0	0	0	0	0	15	0	0	0	0	15	Fungi{superkingdom}(62);Chytridiomycota{phylum}(62);unidentified{class}(62);unidentified{order}(62);unidentified{family}(62);unidentified{genus}(62);unidentified{species}(62)	Fungi	Chytridiomycota	unidentified	unidentified	unidentified	unidentified	unidentified
ASV2177	0	0	0	91	0	0	0	0	0	0	0	0	0	0	0	91	Fungi{superkingdom}(67);Ascomycota{phylum}(67);Unassigned{class}(0);Unassigned{order}(0);Unassigned{family}(0);Unassigned{genus}(0);Unassigned{species}(0)	Fungi	Ascomycota	Unassigned	Unassigned	Unassigned	Unassigned	Unassigned
ASV2196	0	0	0	0	0	0	0	0	0	0	0	33	0	0	0	33	Fungi{superkingdom}(100);Unassigned{phylum}(0);Unassigned{class}(0);Unassigned{order}(0);Unassigned{family}(0);Unassigned{genus}(0);Unassigned{species}(0)	Fungi	Unassigned	Unassigned	Unassigned	Unassigned	Unassigned	Unassigned
ASV2200	0	0	0	0	0	55	0	16	0	0	0	0	0	0	0	71	Fungi{superkingdom}(99);unidentified{phylum}(99);unidentified{class}(99);unidentified{order}(99);unidentified{family}(99);unidentified{genus}(99);unidentified{species}(99)	Fungi	unidentified	unidentified	unidentified	unidentified	unidentified	unidentified
ASV2205	0	0	0	0	0	0	0	0	0	0	0	0	0	0	39	39	Fungi{superkingdom}(72);unidentified{phylum}(72);unidentified{class}(72);unidentified{order}(72);unidentified{family}(72);unidentified{genus}(72);unidentified{species}(72)	Fungi	unidentified	unidentified	unidentified	unidentified	unidentified	unidentified
ASV2207	0	0	0	0	0	0	0	42	0	0	0	0	0	0	0	42	Fungi{superkingdom}(99);Ascomycota{phylum}(99);Dothideomycetes{class}(99);Pleosporales{order}(99);Thyridariaceae{family}(99);Roussoella{genus}(99);Roussoella_mexicana{species}(99)	Fungi	Ascomycota	Dothideomycetes	Pleosporales	Thyridariaceae	Roussoella	Roussoella_mexicana
ASV2216	10	0	0	0	0	0	0	0	0	0	0	51	0	0	0	61	Fungi{superkingdom}(89);Basidiomycota{phylum}(89);Agaricomycetes{class}(89);Unassigned{order}(0);Unassigned{family}(0);Unassigned{genus}(0);Unassigned{species}(0)	Fungi	Basidiomycota	Agaricomycetes	Unassigned	Unassigned	Unassigned	Unassigned
ASV2217	0	0	0	0	0	0	0	0	0	0	0	0	0	0	14	14	Fungi{superkingdom}(95);unidentified{phylum}(95);unidentified{class}(95);unidentified{order}(95);unidentified{family}(95);unidentified{genus}(95);unidentified{species}(95)	Fungi	unidentified	unidentified	unidentified	unidentified	unidentified	unidentified
ASV2222	2	0	0	0	0	0	0	0	0	0	0	0	0	0	27	29	Fungi{superkingdom}(92);Basidiomycota{phylum}(92);Tremellomycetes{class}(92);Filobasidiales{order}(92);Filobasidiaceae{family}(92);Filobasidium{genus}(92);Filobasidium_globisporum{species}(92)	Fungi	Basidiomycota	Tremellomycetes	Filobasidiales	Filobasidiaceae	Filobasidium	Filobasidium_globisporum
ASV2223	0	0	12	0	0	0	0	0	0	16	0	0	0	0	0	28	Fungi{superkingdom}(100);Basidiomycota{phylum}(100);Tremellomycetes{class}(100);Tremellales{order}(100);Bulleribasidiaceae{family}(100);Vishniacozyma{genus}(100);Vishniacozyma_carnescens{species}(100)	Fungi	Basidiomycota	Tremellomycetes	Tremellales	Bulleribasidiaceae	Vishniacozyma	Vishniacozyma_carnescens
ASV2226	0	20	0	0	0	0	0	0	0	23	0	0	0	0	0	43	Fungi{superkingdom}(98);Basidiomycota{phylum}(98);Tremellomycetes{class}(98);Filobasidiales{order}(98);Filobasidiaceae{family}(98);Filobasidium{genus}(98);Filobasidium_globisporum{species}(98)	Fungi	Basidiomycota	Tremellomycetes	Filobasidiales	Filobasidiaceae	Filobasidium	Filobasidium_globisporum
ASV2248	55	0	0	0	0	0	0	0	0	0	0	0	0	0	0	55	Fungi{superkingdom}(69);Glomeromycota{phylum}(69);Glomeromycetes{class}(69);Glomerales{order}(69);Glomeraceae{family}(69);Glomus{genus}(69);Glomus_aggregatum{species}(69)	Fungi	Glomeromycota	Glomeromycetes	Glomerales	Glomeraceae	Glomus	Glomus_aggregatum
ASV2260	0	198	0	0	0	0	0	0	0	0	0	0	0	0	0	198	Fungi{superkingdom}(87);Ascomycota{phylum}(87);Eurotiomycetes{class}(87);Chaetothyriales{order}(87);unidentified{family}(87);unidentified{genus}(87);unidentified{species}(87)	Fungi	Ascomycota	Eurotiomycetes	Chaetothyriales	unidentified	unidentified	unidentified
ASV2262	0	0	0	0	0	0	7	0	0	0	0	0	0	0	0	7	Fungi{superkingdom}(67);Basidiomycota{phylum}(67);Agaricomycetes{class}(67);Agaricales{order}(67);unidentified{family}(67);unidentified{genus}(67);unidentified{species}(67)	Fungi	Basidiomycota	Agaricomycetes	Agaricales	unidentified	unidentified	unidentified
ASV2263	0	0	0	0	0	0	0	0	0	7	0	0	0	0	0	7	Fungi{superkingdom}(87);unidentified{phylum}(87);unidentified{class}(87);unidentified{order}(87);unidentified{family}(87);unidentified{genus}(87);unidentified{species}(87)	Fungi	unidentified	unidentified	unidentified	unidentified	unidentified	unidentified
ASV2264	0	0	0	0	0	18	0	0	0	0	0	0	0	0	0	18	Fungi{superkingdom}(79);unidentified{phylum}(79);unidentified{class}(79);unidentified{order}(79);unidentified{family}(79);unidentified{genus}(79);unidentified{species}(79)	Fungi	unidentified	unidentified	unidentified	unidentified	unidentified	unidentified
ASV2271	0	0	0	0	0	0	0	0	0	0	0	22	0	0	0	22	Fungi{superkingdom}(96);Basidiomycota{phylum}(96);Cystobasidiomycetes{class}(96);Cystobasidiomycetes_ord_Incertae_sedis{order}(96);Symmetrosporaceae{family}(96);Symmetrospora{genus}(96);Symmetrospora_coprosmae{species}(96)	Fungi	Basidiomycota	Cystobasidiomycetes	Cystobasidiomycetes_ord_Incertae_sedis	Symmetrosporaceae	Symmetrospora	Symmetrospora_coprosmae
ASV2272	0	0	0	0	0	0	0	0	0	10	0	0	0	0	0	10	Fungi{superkingdom}(62);Ascomycota{phylum}(62);Unassigned{class}(0);Unassigned{order}(0);Unassigned{family}(0);Unassigned{genus}(0);Unassigned{species}(0)	Fungi	Ascomycota	Unassigned	Unassigned	Unassigned	Unassigned	Unassigned
ASV2277	0	0	31	0	0	0	0	0	0	0	0	0	0	0	0	31	Fungi{superkingdom}(100);Unassigned{phylum}(0);Unassigned{class}(0);Unassigned{order}(0);Unassigned{family}(0);Unassigned{genus}(0);Unassigned{species}(0)	Fungi	Unassigned	Unassigned	Unassigned	Unassigned	Unassigned	Unassigned
ASV2280	0	0	0	0	0	0	0	0	0	0	8	0	0	0	0	8	Fungi{superkingdom}(100);Calcarisporiellomycota{phylum}(100);Calcarisporiellomycetes{class}(100);Calcarisporiellales{order}(100);Calcarisporiellaceae{family}(100);Calcarisporiella{genus}(100);unidentified{species}(100)	Fungi	Calcarisporiellomycota	Calcarisporiellomycetes	Calcarisporiellales	Calcarisporiellaceae	Calcarisporiella	unidentified
ASV2333	0	0	0	0	0	0	0	0	0	0	0	71	0	0	0	71	Fungi{superkingdom}(97);unidentified{phylum}(97);unidentified{class}(97);unidentified{order}(97);unidentified{family}(97);unidentified{genus}(97);unidentified{species}(97)	Fungi	unidentified	unidentified	unidentified	unidentified	unidentified	unidentified
ASV2345	0	0	0	0	0	0	0	20	0	0	0	101	0	0	0	121	Fungi{superkingdom}(97);Ascomycota{phylum}(97);Sordariomycetes{class}(97);Sordariales{order}(97);Lasiosphaeriaceae{family}(97);Schizothecium{genus}(97);Schizothecium_inaequale{species}(97)	Fungi	Ascomycota	Sordariomycetes	Sordariales	Lasiosphaeriaceae	Schizothecium	Schizothecium_inaequale
ASV2348	0	0	0	0	0	0	0	0	152	0	0	0	0	0	0	152	Fungi{superkingdom}(100);Unassigned{phylum}(0);Unassigned{class}(0);Unassigned{order}(0);Unassigned{family}(0);Unassigned{genus}(0);Unassigned{species}(0)	Fungi	Unassigned	Unassigned	Unassigned	Unassigned	Unassigned	Unassigned
ASV2357	0	188	0	0	10	0	0	0	0	0	0	0	0	0	0	198	Fungi{superkingdom}(100);Unassigned{phylum}(0);Unassigned{class}(0);Unassigned{order}(0);Unassigned{family}(0);Unassigned{genus}(0);Unassigned{species}(0)	Fungi	Unassigned	Unassigned	Unassigned	Unassigned	Unassigned	Unassigned
ASV2386	0	0	0	0	0	0	0	0	0	27	0	0	0	0	0	27	Fungi{superkingdom}(81);unidentified{phylum}(81);unidentified{class}(81);unidentified{order}(81);unidentified{family}(81);unidentified{genus}(81);unidentified{species}(81)	Fungi	unidentified	unidentified	unidentified	unidentified	unidentified	unidentified
ASV2387	0	0	0	0	0	0	0	13	0	0	0	0	0	0	0	13	Fungi{superkingdom}(89);Basidiomycota{phylum}(89);Microbotryomycetes{class}(89);Sporidiobolales{order}(89);Sporidiobolaceae{family}(89);Rhodotorula{genus}(89);Rhodotorula_babjevae{species}(89)	Fungi	Basidiomycota	Microbotryomycetes	Sporidiobolales	Sporidiobolaceae	Rhodotorula	Rhodotorula_babjevae
ASV2397	0	0	0	0	0	0	0	0	0	0	21	0	0	0	0	21	Fungi{superkingdom}(94);unidentified{phylum}(94);unidentified{class}(94);unidentified{order}(94);unidentified{family}(94);unidentified{genus}(94);unidentified{species}(94)	Fungi	unidentified	unidentified	unidentified	unidentified	unidentified	unidentified
ASV2409	0	0	60	0	0	0	0	0	0	0	0	0	0	0	0	60	Fungi{superkingdom}(100);Basidiomycota{phylum}(100);Agaricomycetes{class}(100);Agaricales{order}(100);Bolbitiaceae{family}(100);Conocybe{genus}(100);Conocybe_anthracophila{species}(100)	Fungi	Basidiomycota	Agaricomycetes	Agaricales	Bolbitiaceae	Conocybe	Conocybe_anthracophila
ASV2410	0	0	0	4	0	0	0	0	0	0	18	0	0	0	0	22	Fungi{superkingdom}(94);Basidiomycota{phylum}(94);Cystobasidiomycetes{class}(94);Cystobasidiomycetes_ord_Incertae_sedis{order}(94);Symmetrosporaceae{family}(94);Symmetrospora{genus}(94);Symmetrospora_coprosmae{species}(94)	Fungi	Basidiomycota	Cystobasidiomycetes	Cystobasidiomycetes_ord_Incertae_sedis	Symmetrosporaceae	Symmetrospora	Symmetrospora_coprosmae
ASV2421	0	0	0	0	0	0	0	0	0	52	0	0	0	0	0	52	Fungi{superkingdom}(74);unidentified{phylum}(74);unidentified{class}(74);unidentified{order}(74);unidentified{family}(74);unidentified{genus}(74);unidentified{species}(74)	Fungi	unidentified	unidentified	unidentified	unidentified	unidentified	unidentified
ASV2422	182	0	0	0	0	0	0	0	0	0	0	0	0	0	0	182	Fungi{superkingdom}(83);unidentified{phylum}(83);unidentified{class}(83);unidentified{order}(83);unidentified{family}(83);unidentified{genus}(83);unidentified{species}(83)	Fungi	unidentified	unidentified	unidentified	unidentified	unidentified	unidentified
ASV2442	0	0	0	0	0	0	0	0	0	0	0	0	15	0	0	15	Fungi{superkingdom}(99);unidentified{phylum}(99);unidentified{class}(99);unidentified{order}(99);unidentified{family}(99);unidentified{genus}(99);unidentified{species}(99)	Fungi	unidentified	unidentified	unidentified	unidentified	unidentified	unidentified
ASV2450	0	0	0	0	0	0	0	0	67	0	0	0	0	0	0	67	Fungi{superkingdom}(68);Basidiomycota{phylum}(68);Agaricomycetes{class}(68);unidentified{order}(68);unidentified{family}(68);unidentified{genus}(68);unidentified{species}(68)	Fungi	Basidiomycota	Agaricomycetes	unidentified	unidentified	unidentified	unidentified
ASV2460	6	0	0	0	9	0	0	0	0	0	0	0	0	0	0	15	Fungi{superkingdom}(100);Unassigned{phylum}(0);Unassigned{class}(0);Unassigned{order}(0);Unassigned{family}(0);Unassigned{genus}(0);Unassigned{species}(0)	Fungi	Unassigned	Unassigned	Unassigned	Unassigned	Unassigned	Unassigned
ASV2476	0	0	0	0	7	0	0	0	0	0	0	0	0	0	0	7	Fungi{superkingdom}(100);Ascomycota{phylum}(100);Dothideomycetes{class}(100);Pleosporales{order}(100);Didymosphaeriaceae{family}(100);Kalmusia{genus}(100);unidentified{species}(100)	Fungi	Ascomycota	Dothideomycetes	Pleosporales	Didymosphaeriaceae	Kalmusia	unidentified
ASV2477	0	0	0	0	0	0	0	0	18	0	0	0	0	0	0	18	Fungi{superkingdom}(64);Ascomycota{phylum}(64);unidentified{class}(64);unidentified{order}(64);unidentified{family}(64);unidentified{genus}(64);unidentified{species}(64)	Fungi	Ascomycota	unidentified	unidentified	unidentified	unidentified	unidentified
ASV2478	0	92	0	0	0	0	0	0	0	0	0	0	0	0	0	92	Fungi{superkingdom}(73);Ascomycota{phylum}(73);Sordariomycetes{class}(73);Hypocreales{order}(73);Bionectriaceae{family}(73);Clonostachys{genus}(73);Clonostachys_rosea{species}(73)	Fungi	Ascomycota	Sordariomycetes	Hypocreales	Bionectriaceae	Clonostachys	Clonostachys_rosea
ASV2483	0	0	0	0	0	0	0	26	0	0	0	0	0	0	0	26	Fungi{superkingdom}(99);unidentified{phylum}(99);unidentified{class}(99);unidentified{order}(99);unidentified{family}(99);unidentified{genus}(99);unidentified{species}(99)	Fungi	unidentified	unidentified	unidentified	unidentified	unidentified	unidentified
ASV2484	0	0	0	0	0	0	0	0	0	0	0	0	0	8	0	8	Fungi{superkingdom}(79);unidentified{phylum}(79);unidentified{class}(79);unidentified{order}(79);unidentified{family}(79);unidentified{genus}(79);unidentified{species}(79)	Fungi	unidentified	unidentified	unidentified	unidentified	unidentified	unidentified
ASV2522	59	151	0	0	0	0	0	0	0	0	0	0	0	0	0	210	Fungi{superkingdom}(100);Unassigned{phylum}(0);Unassigned{class}(0);Unassigned{order}(0);Unassigned{family}(0);Unassigned{genus}(0);Unassigned{species}(0)	Fungi	Unassigned	Unassigned	Unassigned	Unassigned	Unassigned	Unassigned
ASV2526	0	0	0	0	0	0	17	0	0	0	0	0	0	0	0	17	Fungi{superkingdom}(71);Ascomycota{phylum}(71);Leotiomycetes{class}(71);Unassigned{order}(0);Unassigned{family}(0);Unassigned{genus}(0);Unassigned{species}(0)	Fungi	Ascomycota	Leotiomycetes	Unassigned	Unassigned	Unassigned	Unassigned
ASV2528	8	0	0	0	0	0	0	0	0	0	0	0	0	0	0	8	Fungi{superkingdom}(68);Ascomycota{phylum}(68);Dothideomycetes{class}(68);Pleosporales{order}(68);Phaeosphaeriaceae{family}(68);Unassigned{genus}(0);Unassigned{species}(0)	Fungi	Ascomycota	Dothideomycetes	Pleosporales	Phaeosphaeriaceae	Unassigned	Unassigned
ASV2530	0	0	0	0	0	0	15	0	0	0	0	0	0	0	0	15	Fungi{superkingdom}(100);Unassigned{phylum}(0);Unassigned{class}(0);Unassigned{order}(0);Unassigned{family}(0);Unassigned{genus}(0);Unassigned{species}(0)	Fungi	Unassigned	Unassigned	Unassigned	Unassigned	Unassigned	Unassigned
ASV2536	0	0	0	0	0	0	0	0	0	0	0	0	51	0	0	51	Fungi{superkingdom}(89);Basidiomycota{phylum}(89);Agaricomycetes{class}(89);Cantharellales{order}(89);Ceratobasidiaceae{family}(89);unidentified{genus}(89);unidentified{species}(89)	Fungi	Basidiomycota	Agaricomycetes	Cantharellales	Ceratobasidiaceae	unidentified	unidentified
ASV2537	0	0	0	0	0	0	209	0	0	0	0	0	0	0	0	209	Fungi{superkingdom}(100);Unassigned{phylum}(0);Unassigned{class}(0);Unassigned{order}(0);Unassigned{family}(0);Unassigned{genus}(0);Unassigned{species}(0)	Fungi	Unassigned	Unassigned	Unassigned	Unassigned	Unassigned	Unassigned
ASV2559	0	3	0	0	9	0	0	0	0	0	0	0	0	0	0	12	Fungi{superkingdom}(99);Ascomycota{phylum}(99);Eurotiomycetes{class}(99);Eurotiales{order}(99);Aspergillaceae{family}(99);Penicillium{genus}(99);Penicillium_steckii{species}(99)	Fungi	Ascomycota	Eurotiomycetes	Eurotiales	Aspergillaceae	Penicillium	Penicillium_steckii
ASV2564	0	19	0	0	0	0	0	0	0	0	0	0	0	0	0	19	Fungi{superkingdom}(97);unidentified{phylum}(97);unidentified{class}(97);unidentified{order}(97);unidentified{family}(97);unidentified{genus}(97);unidentified{species}(97)	Fungi	unidentified	unidentified	unidentified	unidentified	unidentified	unidentified
ASV2565	0	0	0	0	6	0	0	0	0	0	0	0	0	0	0	6	Fungi{superkingdom}(89);unidentified{phylum}(89);unidentified{class}(89);unidentified{order}(89);unidentified{family}(89);unidentified{genus}(89);unidentified{species}(89)	Fungi	unidentified	unidentified	unidentified	unidentified	unidentified	unidentified
ASV2573	0	0	0	0	0	0	0	42	0	0	0	0	0	0	0	42	Fungi{superkingdom}(69);Basidiomycota{phylum}(69);Agaricomycetes{class}(69);Agaricales{order}(69);unidentified{family}(69);unidentified{genus}(69);unidentified{species}(69)	Fungi	Basidiomycota	Agaricomycetes	Agaricales	unidentified	unidentified	unidentified
ASV2575	0	0	0	0	0	0	0	47	0	0	0	0	0	0	0	47	Fungi{superkingdom}(67);Ascomycota{phylum}(67);Dothideomycetes{class}(67);Pleosporales{order}(67);Didymellaceae{family}(67);Calophoma{genus}(67);Calophoma_rosae{species}(67)	Fungi	Ascomycota	Dothideomycetes	Pleosporales	Didymellaceae	Calophoma	Calophoma_rosae
ASV2582	0	0	0	0	0	0	0	0	0	0	10	0	0	0	0	10	Fungi{superkingdom}(71);Ascomycota{phylum}(71);Dothideomycetes{class}(71);Capnodiales{order}(71);unidentified{family}(71);unidentified{genus}(71);unidentified{species}(71)	Fungi	Ascomycota	Dothideomycetes	Capnodiales	unidentified	unidentified	unidentified
ASV2584	13	0	0	0	19	0	0	0	0	0	0	0	0	0	0	32	Fungi{superkingdom}(91);unidentified{phylum}(91);unidentified{class}(91);unidentified{order}(91);unidentified{family}(91);unidentified{genus}(91);unidentified{species}(91)	Fungi	unidentified	unidentified	unidentified	unidentified	unidentified	unidentified
ASV2585	11	0	0	0	0	0	0	0	0	0	0	0	0	0	0	11	Fungi{superkingdom}(72);Ascomycota{phylum}(72);Leotiomycetes{class}(72);Helotiales{order}(72);unidentified{family}(72);unidentified{genus}(72);unidentified{species}(72)	Fungi	Ascomycota	Leotiomycetes	Helotiales	unidentified	unidentified	unidentified
ASV2596	0	0	0	0	0	0	0	0	0	11	0	0	62	0	0	73	Fungi{superkingdom}(79);Ascomycota{phylum}(79);Sordariomycetes{class}(79);Glomerellales{order}(79);Plectosphaerellaceae{family}(79);Plectosphaerella{genus}(79);Plectosphaerella_oratosquillae{species}(79)	Fungi	Ascomycota	Sordariomycetes	Glomerellales	Plectosphaerellaceae	Plectosphaerella	Plectosphaerella_oratosquillae
ASV2602	0	0	12	0	0	25	0	16	0	4	0	0	0	0	0	57	Fungi{superkingdom}(90);Glomeromycota{phylum}(90);Glomeromycetes{class}(90);Glomerales{order}(90);Glomeraceae{family}(90);Glomus{genus}(90);Glomus_cubense{species}(90)	Fungi	Glomeromycota	Glomeromycetes	Glomerales	Glomeraceae	Glomus	Glomus_cubense
ASV2603	0	0	0	0	0	0	6	0	0	0	0	0	0	0	0	6	Fungi{superkingdom}(100);Unassigned{phylum}(0);Unassigned{class}(0);Unassigned{order}(0);Unassigned{family}(0);Unassigned{genus}(0);Unassigned{species}(0)	Fungi	Unassigned	Unassigned	Unassigned	Unassigned	Unassigned	Unassigned
ASV2621	0	0	0	0	0	0	0	0	0	0	0	58	0	0	0	58	Fungi{superkingdom}(66);Ascomycota{phylum}(66);unidentified{class}(66);unidentified{order}(66);unidentified{family}(66);unidentified{genus}(66);unidentified{species}(66)	Fungi	Ascomycota	unidentified	unidentified	unidentified	unidentified	unidentified
ASV2635	0	0	0	0	0	0	19	0	0	0	0	0	0	0	0	19	Fungi{superkingdom}(98);unidentified{phylum}(98);unidentified{class}(98);unidentified{order}(98);unidentified{family}(98);unidentified{genus}(98);unidentified{species}(98)	Fungi	unidentified	unidentified	unidentified	unidentified	unidentified	unidentified
ASV2639	0	0	0	0	0	0	0	0	0	0	0	0	0	0	41	41	Fungi{superkingdom}(98);Mortierellomycota{phylum}(98);Mortierellomycetes{class}(98);Mortierellales{order}(98);Mortierellaceae{family}(98);Mortierella{genus}(98);Unassigned{species}(0)	Fungi	Mortierellomycota	Mortierellomycetes	Mortierellales	Mortierellaceae	Mortierella	Unassigned
ASV2648	0	29	0	0	0	0	0	0	0	0	0	0	0	0	0	29	Fungi{superkingdom}(67);Ascomycota{phylum}(67);Eurotiomycetes{class}(67);Chaetothyriales{order}(67);unidentified{family}(67);unidentified{genus}(67);unidentified{species}(67)	Fungi	Ascomycota	Eurotiomycetes	Chaetothyriales	unidentified	unidentified	unidentified
ASV2669	0	0	0	0	10	0	0	0	0	0	0	0	0	0	0	10	Fungi{superkingdom}(99);unidentified{phylum}(99);unidentified{class}(99);unidentified{order}(99);unidentified{family}(99);unidentified{genus}(99);unidentified{species}(99)	Fungi	unidentified	unidentified	unidentified	unidentified	unidentified	unidentified
ASV2670	0	21	0	0	0	0	0	0	0	0	0	0	0	0	0	21	Fungi{superkingdom}(60);Ascomycota{phylum}(60);Sordariomycetes{class}(60);Sordariales{order}(60);Lasiosphaeriaceae{family}(60);Podospora{genus}(60);Podospora_intestinacea{species}(60)	Fungi	Ascomycota	Sordariomycetes	Sordariales	Lasiosphaeriaceae	Podospora	Podospora_intestinacea
ASV2671	0	0	0	0	0	0	0	0	0	0	0	0	0	113	0	113	Fungi{superkingdom}(100);Unassigned{phylum}(0);Unassigned{class}(0);Unassigned{order}(0);Unassigned{family}(0);Unassigned{genus}(0);Unassigned{species}(0)	Fungi	Unassigned	Unassigned	Unassigned	Unassigned	Unassigned	Unassigned
ASV2673	0	0	0	0	0	0	0	0	0	0	0	37	0	0	0	37	Fungi{superkingdom}(69);Basidiomycota{phylum}(69);Agaricomycetes{class}(69);Unassigned{order}(0);Unassigned{family}(0);Unassigned{genus}(0);Unassigned{species}(0)	Fungi	Basidiomycota	Agaricomycetes	Unassigned	Unassigned	Unassigned	Unassigned
ASV2681	0	0	0	0	0	24	0	0	0	0	0	0	0	0	0	24	Fungi{superkingdom}(71);Ascomycota{phylum}(71);Leotiomycetes{class}(71);Helotiales{order}(71);Dermateaceae{family}(71);Neofabraea{genus}(71);Unassigned{species}(0)	Fungi	Ascomycota	Leotiomycetes	Helotiales	Dermateaceae	Neofabraea	Unassigned
ASV2688	0	0	0	0	0	0	0	0	0	0	29	0	0	0	0	29	Fungi{superkingdom}(96);unidentified{phylum}(96);unidentified{class}(96);unidentified{order}(96);unidentified{family}(96);unidentified{genus}(96);unidentified{species}(96)	Fungi	unidentified	unidentified	unidentified	unidentified	unidentified	unidentified
ASV2689	0	0	0	0	10	0	0	0	0	0	0	0	0	0	0	10	Fungi{superkingdom}(97);Ascomycota{phylum}(97);Pezizomycetes{class}(97);Pezizales{order}(97);Ascobolaceae{family}(97);unidentified{genus}(97);unidentified{species}(97)	Fungi	Ascomycota	Pezizomycetes	Pezizales	Ascobolaceae	unidentified	unidentified
ASV2690	0	0	0	0	0	0	0	0	0	13	0	0	0	0	0	13	Fungi{superkingdom}(100);Ascomycota{phylum}(100);Dothideomycetes{class}(100);Pleosporales{order}(100);Phaeosphaeriaceae{family}(100);Neosetophoma{genus}(100);Unassigned{species}(0)	Fungi	Ascomycota	Dothideomycetes	Pleosporales	Phaeosphaeriaceae	Neosetophoma	Unassigned
ASV2702	0	0	0	76	0	0	0	0	0	0	0	0	0	0	0	76	Fungi{superkingdom}(80);Ascomycota{phylum}(80);Sordariomycetes{class}(80);Unassigned{order}(0);Unassigned{family}(0);Unassigned{genus}(0);Unassigned{species}(0)	Fungi	Ascomycota	Sordariomycetes	Unassigned	Unassigned	Unassigned	Unassigned
ASV2705	0	0	0	0	0	0	6	0	0	0	0	0	0	0	0	6	Fungi{superkingdom}(93);unidentified{phylum}(93);unidentified{class}(93);unidentified{order}(93);unidentified{family}(93);unidentified{genus}(93);unidentified{species}(93)	Fungi	unidentified	unidentified	unidentified	unidentified	unidentified	unidentified
ASV2706	0	0	34	0	0	0	0	0	0	0	0	0	0	0	0	34	Fungi{superkingdom}(100);Ascomycota{phylum}(100);Eurotiomycetes{class}(100);Chaetothyriales{order}(100);Herpotrichiellaceae{family}(100);Exophiala{genus}(100);Exophiala_radicis{species}(100)	Fungi	Ascomycota	Eurotiomycetes	Chaetothyriales	Herpotrichiellaceae	Exophiala	Exophiala_radicis
ASV2712	0	193	0	0	0	0	0	0	0	0	0	0	0	0	0	193	Fungi{superkingdom}(71);Chytridiomycota{phylum}(71);unidentified{class}(71);unidentified{order}(71);unidentified{family}(71);unidentified{genus}(71);unidentified{species}(71)	Fungi	Chytridiomycota	unidentified	unidentified	unidentified	unidentified	unidentified
ASV2717	0	0	0	0	0	40	0	0	0	0	0	0	0	0	0	40	Fungi{superkingdom}(100);Unassigned{phylum}(0);Unassigned{class}(0);Unassigned{order}(0);Unassigned{family}(0);Unassigned{genus}(0);Unassigned{species}(0)	Fungi	Unassigned	Unassigned	Unassigned	Unassigned	Unassigned	Unassigned
ASV2720	0	0	0	0	0	0	0	0	0	0	0	0	0	0	15	15	Fungi{superkingdom}(98);Basidiomycota{phylum}(98);Agaricomycetes{class}(98);Cantharellales{order}(98);Ceratobasidiaceae{family}(98);Thanatephorus{genus}(98);Thanatephorus_cucumeris{species}(98)	Fungi	Basidiomycota	Agaricomycetes	Cantharellales	Ceratobasidiaceae	Thanatephorus	Thanatephorus_cucumeris
ASV2721	0	0	0	0	0	0	0	0	0	0	0	0	0	0	9	9	Fungi{superkingdom}(98);unidentified{phylum}(98);unidentified{class}(98);unidentified{order}(98);unidentified{family}(98);unidentified{genus}(98);unidentified{species}(98)	Fungi	unidentified	unidentified	unidentified	unidentified	unidentified	unidentified
ASV2723	0	28	0	0	0	0	0	0	0	0	0	0	0	0	0	28	Fungi{superkingdom}(65);unidentified{phylum}(65);unidentified{class}(65);unidentified{order}(65);unidentified{family}(65);unidentified{genus}(65);unidentified{species}(65)	Fungi	unidentified	unidentified	unidentified	unidentified	unidentified	unidentified
ASV2735	0	0	0	29	0	0	0	0	0	0	0	0	0	0	0	29	Fungi{superkingdom}(100);Basidiomycota{phylum}(100);Agaricomycetes{class}(100);Agaricales{order}(100);Entolomataceae{family}(100);Entoloma{genus}(100);Unassigned{species}(0)	Fungi	Basidiomycota	Agaricomycetes	Agaricales	Entolomataceae	Entoloma	Unassigned
ASV2747	0	0	32	0	0	0	0	0	0	0	0	0	0	0	0	32	Fungi{superkingdom}(100);Unassigned{phylum}(0);Unassigned{class}(0);Unassigned{order}(0);Unassigned{family}(0);Unassigned{genus}(0);Unassigned{species}(0)	Fungi	Unassigned	Unassigned	Unassigned	Unassigned	Unassigned	Unassigned
ASV2764	0	114	0	0	0	0	0	0	0	0	0	0	0	0	0	114	Fungi{superkingdom}(94);Ascomycota{phylum}(94);Eurotiomycetes{class}(94);Chaetothyriales{order}(94);unidentified{family}(94);unidentified{genus}(94);unidentified{species}(94)	Fungi	Ascomycota	Eurotiomycetes	Chaetothyriales	unidentified	unidentified	unidentified
ASV2773	0	29	0	0	0	0	0	0	0	0	0	0	0	0	0	29	Fungi{superkingdom}(100);Basidiomycota{phylum}(100);Agaricomycetes{class}(100);Agaricales{order}(100);Bolbitiaceae{family}(100);Conocybe{genus}(100);Conocybe_anthracophila{species}(100)	Fungi	Basidiomycota	Agaricomycetes	Agaricales	Bolbitiaceae	Conocybe	Conocybe_anthracophila
ASV2787	15	0	0	0	0	0	0	0	0	0	0	0	0	0	0	15	Fungi{superkingdom}(67);Basidiomycota{phylum}(67);Agaricomycetes{class}(67);Agaricales{order}(67);unidentified{family}(67);unidentified{genus}(67);unidentified{species}(67)	Fungi	Basidiomycota	Agaricomycetes	Agaricales	unidentified	unidentified	unidentified
ASV2803	0	0	0	0	0	0	0	0	0	0	29	0	48	0	0	77	Fungi{superkingdom}(75);unidentified{phylum}(75);unidentified{class}(75);unidentified{order}(75);unidentified{family}(75);unidentified{genus}(75);unidentified{species}(75)	Fungi	unidentified	unidentified	unidentified	unidentified	unidentified	unidentified
ASV2816	0	0	0	0	0	0	0	50	0	0	0	0	0	23	0	73	Fungi{superkingdom}(100);Ascomycota{phylum}(100);Sordariomycetes{class}(100);Xylariales{order}(100);Coniocessiaceae{family}(100);Coniocessia{genus}(100);Coniocessia_maxima{species}(100)	Fungi	Ascomycota	Sordariomycetes	Xylariales	Coniocessiaceae	Coniocessia	Coniocessia_maxima
ASV2819	0	50	0	0	0	0	0	0	0	0	0	0	0	0	0	50	Fungi{superkingdom}(100);Unassigned{phylum}(0);Unassigned{class}(0);Unassigned{order}(0);Unassigned{family}(0);Unassigned{genus}(0);Unassigned{species}(0)	Fungi	Unassigned	Unassigned	Unassigned	Unassigned	Unassigned	Unassigned
ASV2833	0	0	0	0	0	0	0	32	0	0	0	0	0	0	0	32	Fungi{superkingdom}(60);Ascomycota{phylum}(60);unidentified{class}(60);unidentified{order}(60);unidentified{family}(60);unidentified{genus}(60);unidentified{species}(60)	Fungi	Ascomycota	unidentified	unidentified	unidentified	unidentified	unidentified
ASV2836	0	0	0	0	0	0	0	0	22	0	0	0	0	0	0	22	Fungi{superkingdom}(100);Ascomycota{phylum}(100);Sordariomycetes{class}(100);Hypocreales{order}(100);Hypocreales_fam_Incertae_sedis{family}(100);Acremonium{genus}(100);Acremonium_fusidioides{species}(100)	Fungi	Ascomycota	Sordariomycetes	Hypocreales	Hypocreales_fam_Incertae_sedis	Acremonium	Acremonium_fusidioides
ASV2857	0	0	0	0	0	0	0	0	0	34	0	0	0	0	0	34	Fungi{superkingdom}(75);unidentified{phylum}(75);unidentified{class}(75);unidentified{order}(75);unidentified{family}(75);unidentified{genus}(75);unidentified{species}(75)	Fungi	unidentified	unidentified	unidentified	unidentified	unidentified	unidentified
ASV2866	0	0	0	0	0	0	0	10	0	0	0	0	7	0	0	17	Fungi{superkingdom}(71);unidentified{phylum}(71);unidentified{class}(71);unidentified{order}(71);unidentified{family}(71);unidentified{genus}(71);unidentified{species}(71)	Fungi	unidentified	unidentified	unidentified	unidentified	unidentified	unidentified
ASV2869	5	0	0	0	0	0	0	0	0	0	0	0	0	0	0	5	Fungi{superkingdom}(99);Ascomycota{phylum}(99);Dothideomycetes{class}(99);Pleosporales{order}(99);Phaeosphaeriaceae{family}(99);Leptospora{genus}(99);unidentified{species}(99)	Fungi	Ascomycota	Dothideomycetes	Pleosporales	Phaeosphaeriaceae	Leptospora	unidentified
ASV2898	0	0	0	0	0	0	0	0	0	0	0	0	0	53	0	53	Fungi{superkingdom}(72);unidentified{phylum}(72);unidentified{class}(72);unidentified{order}(72);unidentified{family}(72);unidentified{genus}(72);unidentified{species}(72)	Fungi	unidentified	unidentified	unidentified	unidentified	unidentified	unidentified
ASV2914	0	0	0	0	3	0	0	0	0	0	0	0	0	0	0	3	Fungi{superkingdom}(67);Ascomycota{phylum}(67);unidentified{class}(67);unidentified{order}(67);unidentified{family}(67);unidentified{genus}(67);unidentified{species}(67)	Fungi	Ascomycota	unidentified	unidentified	unidentified	unidentified	unidentified
ASV2920	0	0	0	0	58	0	0	0	0	0	0	0	0	0	0	58	Fungi{superkingdom}(84);Ascomycota{phylum}(84);Eurotiomycetes{class}(84);Eurotiales{order}(84);Trichocomaceae{family}(84);Talaromyces{genus}(84);Talaromyces_aculeatus{species}(84)	Fungi	Ascomycota	Eurotiomycetes	Eurotiales	Trichocomaceae	Talaromyces	Talaromyces_aculeatus
ASV2923	0	0	0	0	0	0	25	0	0	23	0	0	0	0	0	48	Fungi{superkingdom}(67);unidentified{phylum}(67);unidentified{class}(67);unidentified{order}(67);unidentified{family}(67);unidentified{genus}(67);unidentified{species}(67)	Fungi	unidentified	unidentified	unidentified	unidentified	unidentified	unidentified
ASV2925	0	0	0	0	0	0	0	0	0	0	0	44	0	0	0	44	Fungi{superkingdom}(78);Basidiomycota{phylum}(78);Agaricomycetes{class}(78);unidentified{order}(78);unidentified{family}(78);unidentified{genus}(78);unidentified{species}(78)	Fungi	Basidiomycota	Agaricomycetes	unidentified	unidentified	unidentified	unidentified
ASV2937	0	0	21	10	0	0	0	0	0	0	0	0	0	0	0	31	Fungi{superkingdom}(100);Unassigned{phylum}(0);Unassigned{class}(0);Unassigned{order}(0);Unassigned{family}(0);Unassigned{genus}(0);Unassigned{species}(0)	Fungi	Unassigned	Unassigned	Unassigned	Unassigned	Unassigned	Unassigned
ASV2959	0	0	0	0	0	0	0	0	0	41	0	0	0	0	0	41	Fungi{superkingdom}(100);Unassigned{phylum}(0);Unassigned{class}(0);Unassigned{order}(0);Unassigned{family}(0);Unassigned{genus}(0);Unassigned{species}(0)	Fungi	Unassigned	Unassigned	Unassigned	Unassigned	Unassigned	Unassigned
ASV2967	0	58	0	0	0	0	0	0	0	0	0	0	0	0	0	58	Fungi{superkingdom}(92);Ascomycota{phylum}(92);Leotiomycetes{class}(92);Helotiales{order}(92);Helotiaceae{family}(92);Tetracladium{genus}(92);Tetracladium_furcatum{species}(92)	Fungi	Ascomycota	Leotiomycetes	Helotiales	Helotiaceae	Tetracladium	Tetracladium_furcatum
ASV2969	0	0	0	0	0	55	0	0	0	0	0	0	0	0	28	83	Fungi{superkingdom}(100);Basidiomycota{phylum}(100);Agaricomycetes{class}(100);Agaricales{order}(100);Entolomataceae{family}(100);Entoloma{genus}(100);Entoloma_graphitipes_f._cystidiatum{species}(100)	Fungi	Basidiomycota	Agaricomycetes	Agaricales	Entolomataceae	Entoloma	Entoloma_graphitipes_f._cystidiatum
ASV2991	38	0	0	0	0	0	0	0	0	0	0	0	0	0	0	38	Fungi{superkingdom}(62);unidentified{phylum}(62);unidentified{class}(62);unidentified{order}(62);unidentified{family}(62);unidentified{genus}(62);unidentified{species}(62)	Fungi	unidentified	unidentified	unidentified	unidentified	unidentified	unidentified
ASV2992	0	170	0	0	0	0	0	0	0	0	0	0	0	0	0	170	Fungi{superkingdom}(86);unidentified{phylum}(86);unidentified{class}(86);unidentified{order}(86);unidentified{family}(86);unidentified{genus}(86);unidentified{species}(86)	Fungi	unidentified	unidentified	unidentified	unidentified	unidentified	unidentified
ASV2993	0	0	0	0	0	0	0	0	0	0	0	0	0	29	0	29	Fungi{superkingdom}(92);Glomeromycota{phylum}(92);Glomeromycetes{class}(92);Glomerales{order}(92);Glomeraceae{family}(92);Glomus{genus}(92);Glomus_aggregatum{species}(92)	Fungi	Glomeromycota	Glomeromycetes	Glomerales	Glomeraceae	Glomus	Glomus_aggregatum
ASV2998	0	0	0	0	2	0	0	0	0	0	0	0	0	0	0	2	Fungi{superkingdom}(73);Basidiomycota{phylum}(73);Agaricomycetes{class}(73);Unassigned{order}(0);Unassigned{family}(0);Unassigned{genus}(0);Unassigned{species}(0)	Fungi	Basidiomycota	Agaricomycetes	Unassigned	Unassigned	Unassigned	Unassigned
ASV3005	0	0	0	0	0	0	0	0	0	0	0	0	0	6	0	6	Fungi{superkingdom}(100);Ascomycota{phylum}(100);Eurotiomycetes{class}(100);Onygenales{order}(100);Onygenales_fam_Incertae_sedis{family}(100);Chrysosporium{genus}(100);Chrysosporium_merdarium{species}(100)	Fungi	Ascomycota	Eurotiomycetes	Onygenales	Onygenales_fam_Incertae_sedis	Chrysosporium	Chrysosporium_merdarium
ASV3014	0	0	0	0	13	0	0	0	0	0	0	0	0	0	0	13	Fungi{superkingdom}(100);Ascomycota{phylum}(100);Arthoniomycetes{class}(100);Lichenostigmatales{order}(100);Phaeococcomycetaceae{family}(100);Phaeococcomyces{genus}(100);unidentified{species}(100)	Fungi	Ascomycota	Arthoniomycetes	Lichenostigmatales	Phaeococcomycetaceae	Phaeococcomyces	unidentified
ASV3023	0	0	0	0	0	0	0	0	0	0	0	0	0	0	38	38	Fungi{superkingdom}(100);Unassigned{phylum}(0);Unassigned{class}(0);Unassigned{order}(0);Unassigned{family}(0);Unassigned{genus}(0);Unassigned{species}(0)	Fungi	Unassigned	Unassigned	Unassigned	Unassigned	Unassigned	Unassigned
ASV3042	0	0	0	0	0	30	0	0	0	0	14	0	0	0	0	44	Fungi{superkingdom}(98);Ascomycota{phylum}(98);Sordariomycetes{class}(98);Sordariales{order}(98);Chaetomiaceae{family}(98);Unassigned{genus}(0);Unassigned{species}(0)	Fungi	Ascomycota	Sordariomycetes	Sordariales	Chaetomiaceae	Unassigned	Unassigned
ASV3055	0	0	0	0	0	0	0	0	0	0	0	0	0	5	0	5	Fungi{superkingdom}(93);unidentified{phylum}(93);unidentified{class}(93);unidentified{order}(93);unidentified{family}(93);unidentified{genus}(93);unidentified{species}(93)	Fungi	unidentified	unidentified	unidentified	unidentified	unidentified	unidentified
ASV3057	0	0	0	0	0	0	0	0	0	0	0	0	0	0	37	37	Fungi{superkingdom}(100);Glomeromycota{phylum}(100);Glomeromycetes{class}(100);Glomerales{order}(100);Glomeraceae{family}(100);Unassigned{genus}(0);Unassigned{species}(0)	Fungi	Glomeromycota	Glomeromycetes	Glomerales	Glomeraceae	Unassigned	Unassigned
ASV3069	0	0	0	0	0	0	0	0	0	0	0	0	0	0	171	171	Fungi{superkingdom}(66);unidentified{phylum}(66);unidentified{class}(66);unidentified{order}(66);unidentified{family}(66);unidentified{genus}(66);unidentified{species}(66)	Fungi	unidentified	unidentified	unidentified	unidentified	unidentified	unidentified
ASV3070	0	0	0	0	0	0	0	33	0	0	0	0	0	0	0	33	Fungi{superkingdom}(100);Unassigned{phylum}(0);Unassigned{class}(0);Unassigned{order}(0);Unassigned{family}(0);Unassigned{genus}(0);Unassigned{species}(0)	Fungi	Unassigned	Unassigned	Unassigned	Unassigned	Unassigned	Unassigned
ASV3087	0	0	0	0	0	0	0	17	0	0	0	0	0	0	0	17	Fungi{superkingdom}(82);unidentified{phylum}(82);unidentified{class}(82);unidentified{order}(82);unidentified{family}(82);unidentified{genus}(82);unidentified{species}(82)	Fungi	unidentified	unidentified	unidentified	unidentified	unidentified	unidentified
ASV3103	0	0	0	0	0	0	0	0	0	0	0	0	33	0	0	33	Fungi{superkingdom}(97);Basidiomycota{phylum}(97);Agaricomycetes{class}(97);Agaricales{order}(97);Bolbitiaceae{family}(97);Conocybe{genus}(97);Unassigned{species}(0)	Fungi	Basidiomycota	Agaricomycetes	Agaricales	Bolbitiaceae	Conocybe	Unassigned
ASV3106	0	37	0	0	0	0	0	0	0	0	0	0	0	0	0	37	Fungi{superkingdom}(87);Ascomycota{phylum}(87);Dothideomycetes{class}(87);Pleosporales{order}(87);Sporormiaceae{family}(87);Preussia{genus}(87);Unassigned{species}(0)	Fungi	Ascomycota	Dothideomycetes	Pleosporales	Sporormiaceae	Preussia	Unassigned
ASV3125	0	0	61	0	0	0	0	0	0	0	0	0	0	0	0	61	Fungi{superkingdom}(100);Unassigned{phylum}(0);Unassigned{class}(0);Unassigned{order}(0);Unassigned{family}(0);Unassigned{genus}(0);Unassigned{species}(0)	Fungi	Unassigned	Unassigned	Unassigned	Unassigned	Unassigned	Unassigned
ASV3128	0	0	0	0	0	0	0	0	0	0	0	44	0	0	0	44	Fungi{superkingdom}(97);unidentified{phylum}(97);unidentified{class}(97);unidentified{order}(97);unidentified{family}(97);unidentified{genus}(97);unidentified{species}(97)	Fungi	unidentified	unidentified	unidentified	unidentified	unidentified	unidentified
ASV3148	0	0	0	0	0	75	0	0	0	0	0	0	0	0	0	75	Fungi{superkingdom}(99);Basidiomycota{phylum}(99);Agaricomycetes{class}(99);Agaricales{order}(99);Pluteaceae{family}(99);Pluteus{genus}(99);Pluteus_semibulbosus{species}(99)	Fungi	Basidiomycota	Agaricomycetes	Agaricales	Pluteaceae	Pluteus	Pluteus_semibulbosus
ASV3149	0	70	0	0	0	0	0	0	0	0	0	0	0	0	0	70	Fungi{superkingdom}(66);Chytridiomycota{phylum}(66);unidentified{class}(66);unidentified{order}(66);unidentified{family}(66);unidentified{genus}(66);unidentified{species}(66)	Fungi	Chytridiomycota	unidentified	unidentified	unidentified	unidentified	unidentified
ASV3150	0	0	0	0	13	0	0	0	0	0	0	0	0	0	0	13	Fungi{superkingdom}(64);Basidiomycota{phylum}(64);Tremellomycetes{class}(64);Tremellales{order}(64);Bulleraceae{family}(64);Genolevuria{genus}(64);Genolevuria_armeniaca{species}(64)	Fungi	Basidiomycota	Tremellomycetes	Tremellales	Bulleraceae	Genolevuria	Genolevuria_armeniaca
ASV3151	0	0	0	0	7	0	16	0	0	0	0	13	0	0	0	36	Fungi{superkingdom}(100);Unassigned{phylum}(0);Unassigned{class}(0);Unassigned{order}(0);Unassigned{family}(0);Unassigned{genus}(0);Unassigned{species}(0)	Fungi	Unassigned	Unassigned	Unassigned	Unassigned	Unassigned	Unassigned
ASV3180	0	0	0	4	0	0	0	0	0	0	0	0	0	0	0	4	Fungi{superkingdom}(100);Ascomycota{phylum}(100);Dothideomycetes{class}(100);Pleosporales{order}(100);Sporormiaceae{family}(100);Sporormia{genus}(100);unidentified{species}(100)	Fungi	Ascomycota	Dothideomycetes	Pleosporales	Sporormiaceae	Sporormia	unidentified
ASV3181	28	0	0	0	0	0	0	0	0	0	0	0	0	0	0	28	Fungi{superkingdom}(100);Ascomycota{phylum}(100);Dothideomycetes{class}(100);Pleosporales{order}(100);Phaeosphaeriaceae{family}(100);Phaeosphaeria{genus}(100);Unassigned{species}(0)	Fungi	Ascomycota	Dothideomycetes	Pleosporales	Phaeosphaeriaceae	Phaeosphaeria	Unassigned
ASV3192	0	0	0	0	0	0	0	0	0	0	0	42	0	0	0	42	Fungi{superkingdom}(100);Basidiomycota{phylum}(100);Agaricomycetes{class}(100);Agaricales{order}(100);Bolbitiaceae{family}(100);Conocybe{genus}(100);Unassigned{species}(0)	Fungi	Basidiomycota	Agaricomycetes	Agaricales	Bolbitiaceae	Conocybe	Unassigned
ASV3195	0	0	0	0	0	0	0	0	0	0	11	0	0	0	0	11	Fungi{superkingdom}(96);Ascomycota{phylum}(96);Dothideomycetes{class}(96);Pleosporales{order}(96);Phaeosphaeriaceae{family}(96);Piniphoma{genus}(96);Piniphoma_wesendahlina{species}(96)	Fungi	Ascomycota	Dothideomycetes	Pleosporales	Phaeosphaeriaceae	Piniphoma	Piniphoma_wesendahlina
ASV3196	0	0	32	0	0	0	0	0	0	0	0	0	0	0	0	32	Fungi{superkingdom}(96);unidentified{phylum}(96);unidentified{class}(96);unidentified{order}(96);unidentified{family}(96);unidentified{genus}(96);unidentified{species}(96)	Fungi	unidentified	unidentified	unidentified	unidentified	unidentified	unidentified
ASV3200	0	0	0	0	0	0	0	0	39	0	0	0	0	0	0	39	Fungi{superkingdom}(69);unidentified{phylum}(69);unidentified{class}(69);unidentified{order}(69);unidentified{family}(69);unidentified{genus}(69);unidentified{species}(69)	Fungi	unidentified	unidentified	unidentified	unidentified	unidentified	unidentified
ASV3217	0	0	0	0	0	0	0	32	25	0	0	0	0	0	0	57	Fungi{superkingdom}(100);Unassigned{phylum}(0);Unassigned{class}(0);Unassigned{order}(0);Unassigned{family}(0);Unassigned{genus}(0);Unassigned{species}(0)	Fungi	Unassigned	Unassigned	Unassigned	Unassigned	Unassigned	Unassigned
ASV3223	0	0	0	0	18	0	0	0	0	0	0	0	0	0	0	18	Fungi{superkingdom}(100);Unassigned{phylum}(0);Unassigned{class}(0);Unassigned{order}(0);Unassigned{family}(0);Unassigned{genus}(0);Unassigned{species}(0)	Fungi	Unassigned	Unassigned	Unassigned	Unassigned	Unassigned	Unassigned
ASV3229	0	0	0	0	0	0	0	0	0	0	43	0	0	0	0	43	Fungi{superkingdom}(100);Unassigned{phylum}(0);Unassigned{class}(0);Unassigned{order}(0);Unassigned{family}(0);Unassigned{genus}(0);Unassigned{species}(0)	Fungi	Unassigned	Unassigned	Unassigned	Unassigned	Unassigned	Unassigned
ASV3242	0	0	0	0	0	0	0	0	48	0	0	0	0	0	0	48	Fungi{superkingdom}(65);Basidiomycota{phylum}(65);Agaricomycetes{class}(65);unidentified{order}(65);unidentified{family}(65);unidentified{genus}(65);unidentified{species}(65)	Fungi	Basidiomycota	Agaricomycetes	unidentified	unidentified	unidentified	unidentified
ASV3255	0	161	0	0	0	0	0	0	0	0	0	0	0	0	0	161	Fungi{superkingdom}(100);Unassigned{phylum}(0);Unassigned{class}(0);Unassigned{order}(0);Unassigned{family}(0);Unassigned{genus}(0);Unassigned{species}(0)	Fungi	Unassigned	Unassigned	Unassigned	Unassigned	Unassigned	Unassigned
ASV3256	0	0	0	0	0	0	0	0	112	0	0	0	0	0	0	112	Fungi{superkingdom}(100);Unassigned{phylum}(0);Unassigned{class}(0);Unassigned{order}(0);Unassigned{family}(0);Unassigned{genus}(0);Unassigned{species}(0)	Fungi	Unassigned	Unassigned	Unassigned	Unassigned	Unassigned	Unassigned
ASV3258	0	0	0	0	0	0	0	0	0	0	0	48	0	0	0	48	Fungi{superkingdom}(100);Unassigned{phylum}(0);Unassigned{class}(0);Unassigned{order}(0);Unassigned{family}(0);Unassigned{genus}(0);Unassigned{species}(0)	Fungi	Unassigned	Unassigned	Unassigned	Unassigned	Unassigned	Unassigned
ASV3283	0	0	0	0	0	0	0	0	0	0	0	0	36	0	0	36	Fungi{superkingdom}(87);unidentified{phylum}(87);unidentified{class}(87);unidentified{order}(87);unidentified{family}(87);unidentified{genus}(87);unidentified{species}(87)	Fungi	unidentified	unidentified	unidentified	unidentified	unidentified	unidentified
ASV3285	0	0	0	0	0	0	0	0	0	0	0	0	0	12	0	12	Fungi{superkingdom}(99);Ascomycota{phylum}(99);Leotiomycetes{class}(99);Helotiales{order}(99);Helotiaceae{family}(99);Scytalidium{genus}(99);Scytalidium_circinatum{species}(99)	Fungi	Ascomycota	Leotiomycetes	Helotiales	Helotiaceae	Scytalidium	Scytalidium_circinatum
ASV3302	0	0	0	0	0	0	0	64	0	0	0	0	0	0	0	64	Fungi{superkingdom}(69);Chytridiomycota{phylum}(69);unidentified{class}(69);unidentified{order}(69);unidentified{family}(69);unidentified{genus}(69);unidentified{species}(69)	Fungi	Chytridiomycota	unidentified	unidentified	unidentified	unidentified	unidentified
ASV3314	0	0	0	0	0	0	0	0	0	13	0	0	0	0	0	13	Fungi{superkingdom}(100);Ascomycota{phylum}(100);Dothideomycetes{class}(100);Pleosporales{order}(100);Didymosphaeriaceae{family}(100);Kalmusia{genus}(100);unidentified{species}(100)	Fungi	Ascomycota	Dothideomycetes	Pleosporales	Didymosphaeriaceae	Kalmusia	unidentified
ASV3351	0	0	0	0	0	0	0	0	0	0	0	16	0	0	0	16	Fungi{superkingdom}(93);unidentified{phylum}(93);unidentified{class}(93);unidentified{order}(93);unidentified{family}(93);unidentified{genus}(93);unidentified{species}(93)	Fungi	unidentified	unidentified	unidentified	unidentified	unidentified	unidentified
ASV3403	0	0	0	0	0	0	0	0	0	0	0	0	115	0	4	119	Fungi{superkingdom}(100);Unassigned{phylum}(0);Unassigned{class}(0);Unassigned{order}(0);Unassigned{family}(0);Unassigned{genus}(0);Unassigned{species}(0)	Fungi	Unassigned	Unassigned	Unassigned	Unassigned	Unassigned	Unassigned
ASV3424	0	0	0	0	0	0	0	0	0	37	0	0	0	0	0	37	Fungi{superkingdom}(75);unidentified{phylum}(75);unidentified{class}(75);unidentified{order}(75);unidentified{family}(75);unidentified{genus}(75);unidentified{species}(75)	Fungi	unidentified	unidentified	unidentified	unidentified	unidentified	unidentified
ASV3448	0	0	0	0	0	0	0	0	0	0	0	0	0	29	0	29	Fungi{superkingdom}(75);Basidiomycota{phylum}(75);Agaricomycetes{class}(75);Unassigned{order}(0);Unassigned{family}(0);Unassigned{genus}(0);Unassigned{species}(0)	Fungi	Basidiomycota	Agaricomycetes	Unassigned	Unassigned	Unassigned	Unassigned
ASV3467	0	50	0	0	0	0	0	0	0	0	0	0	0	0	0	50	Fungi{superkingdom}(93);Ascomycota{phylum}(93);Eurotiomycetes{class}(93);Chaetothyriales{order}(93);unidentified{family}(93);unidentified{genus}(93);unidentified{species}(93)	Fungi	Ascomycota	Eurotiomycetes	Chaetothyriales	unidentified	unidentified	unidentified
ASV3471	0	0	0	0	0	0	0	0	0	0	0	0	0	0	46	46	Fungi{superkingdom}(100);Basidiomycota{phylum}(100);Agaricomycetes{class}(100);Agaricales{order}(100);Entolomataceae{family}(100);Entoloma{genus}(100);Entoloma_rusticoides{species}(100)	Fungi	Basidiomycota	Agaricomycetes	Agaricales	Entolomataceae	Entoloma	Entoloma_rusticoides
ASV3472	0	0	0	0	0	0	0	0	0	0	0	0	150	0	0	150	Fungi{superkingdom}(67);unidentified{phylum}(67);unidentified{class}(67);unidentified{order}(67);unidentified{family}(67);unidentified{genus}(67);unidentified{species}(67)	Fungi	unidentified	unidentified	unidentified	unidentified	unidentified	unidentified
ASV3473	0	14	0	0	0	0	0	0	0	0	0	0	0	0	0	14	Fungi{superkingdom}(82);unidentified{phylum}(82);unidentified{class}(82);unidentified{order}(82);unidentified{family}(82);unidentified{genus}(82);unidentified{species}(82)	Fungi	unidentified	unidentified	unidentified	unidentified	unidentified	unidentified
ASV3488	0	0	0	0	0	0	0	0	0	0	0	0	43	0	0	43	Fungi{superkingdom}(85);Ascomycota{phylum}(85);Sordariomycetes{class}(85);Hypocreales{order}(85);Nectriaceae{family}(85);Fusarium{genus}(85);Fusarium_penzigii{species}(85)	Fungi	Ascomycota	Sordariomycetes	Hypocreales	Nectriaceae	Fusarium	Fusarium_penzigii
ASV3519	0	43	0	0	0	0	0	0	0	0	0	0	0	0	0	43	Fungi{superkingdom}(63);Basidiomycota{phylum}(63);Agaricomycetes{class}(63);unidentified{order}(63);unidentified{family}(63);unidentified{genus}(63);unidentified{species}(63)	Fungi	Basidiomycota	Agaricomycetes	unidentified	unidentified	unidentified	unidentified
ASV3525	0	0	0	0	0	0	0	47	0	0	0	0	0	0	0	47	Fungi{superkingdom}(87);Ascomycota{phylum}(87);Sordariomycetes{class}(87);Sordariales{order}(87);Chaetomiaceae{family}(87);Chaetomium{genus}(87);Chaetomium_variosporum{species}(87)	Fungi	Ascomycota	Sordariomycetes	Sordariales	Chaetomiaceae	Chaetomium	Chaetomium_variosporum
ASV3526	24	0	0	0	49	0	0	0	0	0	0	0	0	0	0	73	Fungi{superkingdom}(61);unidentified{phylum}(61);unidentified{class}(61);unidentified{order}(61);unidentified{family}(61);unidentified{genus}(61);unidentified{species}(61)	Fungi	unidentified	unidentified	unidentified	unidentified	unidentified	unidentified
ASV3568	71	0	0	0	0	0	0	0	75	0	0	0	0	0	0	146	Fungi{superkingdom}(100);Ascomycota{phylum}(100);Dothideomycetes{class}(100);Pleosporales{order}(100);Pleosporaceae{family}(100);Exserohilum{genus}(100);Exserohilum_rostratum{species}(100)	Fungi	Ascomycota	Dothideomycetes	Pleosporales	Pleosporaceae	Exserohilum	Exserohilum_rostratum
ASV3571	0	0	0	0	0	0	0	35	0	0	0	0	0	0	0	35	Fungi{superkingdom}(91);Basidiomycota{phylum}(91);Agaricomycetes{class}(91);Agaricales{order}(91);Agaricaceae{family}(91);Tulostoma{genus}(91);unidentified{species}(91)	Fungi	Basidiomycota	Agaricomycetes	Agaricales	Agaricaceae	Tulostoma	unidentified
ASV3572	0	0	0	0	0	0	0	0	31	0	0	0	0	0	0	31	Fungi{superkingdom}(93);Glomeromycota{phylum}(93);Glomeromycetes{class}(93);Glomerales{order}(93);Glomeraceae{family}(93);Unassigned{genus}(0);Unassigned{species}(0)	Fungi	Glomeromycota	Glomeromycetes	Glomerales	Glomeraceae	Unassigned	Unassigned
ASV3573	0	0	0	0	4	0	0	0	0	0	0	0	0	0	0	4	Fungi{superkingdom}(94);unidentified{phylum}(94);unidentified{class}(94);unidentified{order}(94);unidentified{family}(94);unidentified{genus}(94);unidentified{species}(94)	Fungi	unidentified	unidentified	unidentified	unidentified	unidentified	unidentified
ASV3594	4	0	0	0	0	0	0	0	0	16	0	0	0	0	0	20	Fungi{superkingdom}(98);unidentified{phylum}(98);unidentified{class}(98);unidentified{order}(98);unidentified{family}(98);unidentified{genus}(98);unidentified{species}(98)	Fungi	unidentified	unidentified	unidentified	unidentified	unidentified	unidentified
ASV3619	0	0	0	0	0	0	0	0	0	0	0	0	54	0	0	54	Fungi{superkingdom}(78);Ascomycota{phylum}(78);unidentified{class}(78);unidentified{order}(78);unidentified{family}(78);unidentified{genus}(78);unidentified{species}(78)	Fungi	Ascomycota	unidentified	unidentified	unidentified	unidentified	unidentified
ASV3632	0	49	0	0	0	0	0	0	0	0	0	0	0	0	0	49	Fungi{superkingdom}(99);unidentified{phylum}(99);unidentified{class}(99);unidentified{order}(99);unidentified{family}(99);unidentified{genus}(99);unidentified{species}(99)	Fungi	unidentified	unidentified	unidentified	unidentified	unidentified	unidentified
ASV3634	0	0	0	0	0	0	6	0	0	0	0	0	0	0	0	6	Fungi{superkingdom}(71);unidentified{phylum}(71);unidentified{class}(71);unidentified{order}(71);unidentified{family}(71);unidentified{genus}(71);unidentified{species}(71)	Fungi	unidentified	unidentified	unidentified	unidentified	unidentified	unidentified
ASV3638	0	0	0	71	0	0	0	0	0	0	0	0	0	0	0	71	Fungi{superkingdom}(100);Ascomycota{phylum}(100);Eurotiomycetes{class}(100);Chaetothyriales{order}(100);Trichomeriaceae{family}(100);Knufia{genus}(100);Knufia_mediterranea{species}(100)	Fungi	Ascomycota	Eurotiomycetes	Chaetothyriales	Trichomeriaceae	Knufia	Knufia_mediterranea
ASV3654	0	0	0	0	5	0	0	0	0	0	0	0	0	0	0	5	Fungi{superkingdom}(98);unidentified{phylum}(98);unidentified{class}(98);unidentified{order}(98);unidentified{family}(98);unidentified{genus}(98);unidentified{species}(98)	Fungi	unidentified	unidentified	unidentified	unidentified	unidentified	unidentified
ASV3662	0	0	0	0	0	0	0	0	36	0	0	0	0	0	0	36	Fungi{superkingdom}(90);Ascomycota{phylum}(90);Dothideomycetes{class}(90);Pleosporales{order}(90);Unassigned{family}(0);Unassigned{genus}(0);Unassigned{species}(0)	Fungi	Ascomycota	Dothideomycetes	Pleosporales	Unassigned	Unassigned	Unassigned
ASV3670	0	0	0	0	0	0	0	0	0	0	0	0	47	0	0	47	Fungi{superkingdom}(62);Glomeromycota{phylum}(62);Glomeromycetes{class}(62);Glomerales{order}(62);Glomeraceae{family}(62);Septoglomus{genus}(62);Unassigned{species}(0)	Fungi	Glomeromycota	Glomeromycetes	Glomerales	Glomeraceae	Septoglomus	Unassigned
ASV3677	0	36	0	23	3	0	0	0	0	0	0	0	0	0	0	62	Fungi{superkingdom}(61);Ascomycota{phylum}(61);unidentified{class}(61);unidentified{order}(61);unidentified{family}(61);unidentified{genus}(61);unidentified{species}(61)	Fungi	Ascomycota	unidentified	unidentified	unidentified	unidentified	unidentified
ASV3679	0	47	0	0	0	0	0	0	0	0	0	0	0	0	0	47	Fungi{superkingdom}(100);Basidiomycota{phylum}(100);Agaricomycetes{class}(100);Agaricales{order}(100);Entolomataceae{family}(100);Entoloma{genus}(100);Entoloma_rusticoides{species}(100)	Fungi	Basidiomycota	Agaricomycetes	Agaricales	Entolomataceae	Entoloma	Entoloma_rusticoides
ASV3682	0	0	0	0	0	0	0	0	0	0	0	0	0	9	0	9	Fungi{superkingdom}(72);Ascomycota{phylum}(72);Eurotiomycetes{class}(72);Chaetothyriales{order}(72);unidentified{family}(72);unidentified{genus}(72);unidentified{species}(72)	Fungi	Ascomycota	Eurotiomycetes	Chaetothyriales	unidentified	unidentified	unidentified
ASV3702	0	22	0	0	0	0	0	0	0	0	0	0	36	0	0	58	Fungi{superkingdom}(94);unidentified{phylum}(94);unidentified{class}(94);unidentified{order}(94);unidentified{family}(94);unidentified{genus}(94);unidentified{species}(94)	Fungi	unidentified	unidentified	unidentified	unidentified	unidentified	unidentified
ASV3722	0	0	0	0	0	0	0	0	0	0	0	0	45	0	0	45	Fungi{superkingdom}(95);Ascomycota{phylum}(95);Eurotiomycetes{class}(95);Eurotiales{order}(95);Aspergillaceae{family}(95);Aspergillus{genus}(95);Aspergillus_protuberus{species}(95)	Fungi	Ascomycota	Eurotiomycetes	Eurotiales	Aspergillaceae	Aspergillus	Aspergillus_protuberus
ASV3761	0	69	0	0	0	0	0	0	0	0	0	0	0	0	0	69	Fungi{superkingdom}(100);Glomeromycota{phylum}(100);Glomeromycetes{class}(100);Glomerales{order}(100);Glomeraceae{family}(100);Dominikia{genus}(100);unidentified{species}(100)	Fungi	Glomeromycota	Glomeromycetes	Glomerales	Glomeraceae	Dominikia	unidentified
ASV3763	0	0	22	0	0	0	0	0	0	0	0	0	0	0	0	22	Fungi{superkingdom}(60);Basidiomycota{phylum}(60);Agaricomycetes{class}(60);Agaricales{order}(60);Omphalotaceae{family}(60);Marasmiellus{genus}(60);Unassigned{species}(0)	Fungi	Basidiomycota	Agaricomycetes	Agaricales	Omphalotaceae	Marasmiellus	Unassigned
ASV3771	0	0	0	0	0	0	0	0	0	0	0	57	0	0	0	57	Fungi{superkingdom}(100);Basidiomycota{phylum}(100);Agaricomycetes{class}(100);Agaricales{order}(100);Entolomataceae{family}(100);Clitopilus{genus}(100);Clitopilus_scyphoides{species}(100)	Fungi	Basidiomycota	Agaricomycetes	Agaricales	Entolomataceae	Clitopilus	Clitopilus_scyphoides
ASV3782	0	0	0	0	0	0	0	0	0	68	0	0	0	0	0	68	Fungi{superkingdom}(100);Unassigned{phylum}(0);Unassigned{class}(0);Unassigned{order}(0);Unassigned{family}(0);Unassigned{genus}(0);Unassigned{species}(0)	Fungi	Unassigned	Unassigned	Unassigned	Unassigned	Unassigned	Unassigned
ASV3792	0	0	0	0	0	0	0	0	0	0	0	0	0	5	0	5	Fungi{superkingdom}(94);unidentified{phylum}(94);unidentified{class}(94);unidentified{order}(94);unidentified{family}(94);unidentified{genus}(94);unidentified{species}(94)	Fungi	unidentified	unidentified	unidentified	unidentified	unidentified	unidentified
ASV3798	0	0	0	0	0	0	0	0	0	0	0	0	47	0	0	47	Fungi{superkingdom}(100);Unassigned{phylum}(0);Unassigned{class}(0);Unassigned{order}(0);Unassigned{family}(0);Unassigned{genus}(0);Unassigned{species}(0)	Fungi	Unassigned	Unassigned	Unassigned	Unassigned	Unassigned	Unassigned
ASV3808	0	0	0	8	0	0	0	0	0	128	0	0	0	0	0	136	Fungi{superkingdom}(91);Chytridiomycota{phylum}(91);unidentified{class}(91);unidentified{order}(91);unidentified{family}(91);unidentified{genus}(91);unidentified{species}(91)	Fungi	Chytridiomycota	unidentified	unidentified	unidentified	unidentified	unidentified
ASV3815	0	0	0	0	0	0	0	0	0	22	0	0	0	0	0	22	Fungi{superkingdom}(100);Ascomycota{phylum}(100);Dothideomycetes{class}(100);Pleosporales{order}(100);Phaeosphaeriaceae{family}(100);Setophaeosphaeria{genus}(100);Setophaeosphaeria_badalingensis{species}(100)	Fungi	Ascomycota	Dothideomycetes	Pleosporales	Phaeosphaeriaceae	Setophaeosphaeria	Setophaeosphaeria_badalingensis
ASV3821	0	0	0	0	0	0	0	0	0	13	0	0	0	0	0	13	Fungi{superkingdom}(100);Ascomycota{phylum}(100);Dothideomycetes{class}(100);Pleosporales{order}(100);Pleosporaceae{family}(100);Alternaria{genus}(100);Alternaria_chlamydosporigena{species}(100)	Fungi	Ascomycota	Dothideomycetes	Pleosporales	Pleosporaceae	Alternaria	Alternaria_chlamydosporigena
ASV3857	12	0	0	0	0	0	0	0	0	0	0	0	0	0	0	12	Fungi{superkingdom}(70);Basidiomycota{phylum}(70);Tremellomycetes{class}(70);Tremellales{order}(70);Bulleraceae{family}(70);Genolevuria{genus}(70);Genolevuria_armeniaca{species}(70)	Fungi	Basidiomycota	Tremellomycetes	Tremellales	Bulleraceae	Genolevuria	Genolevuria_armeniaca
ASV3858	0	0	22	0	0	0	0	0	0	0	0	0	0	0	0	22	Fungi{superkingdom}(90);unidentified{phylum}(90);unidentified{class}(90);unidentified{order}(90);unidentified{family}(90);unidentified{genus}(90);unidentified{species}(90)	Fungi	unidentified	unidentified	unidentified	unidentified	unidentified	unidentified
ASV3863	0	83	0	0	0	0	0	2	0	0	0	0	0	0	0	85	Fungi{superkingdom}(100);Unassigned{phylum}(0);Unassigned{class}(0);Unassigned{order}(0);Unassigned{family}(0);Unassigned{genus}(0);Unassigned{species}(0)	Fungi	Unassigned	Unassigned	Unassigned	Unassigned	Unassigned	Unassigned
ASV3871	0	0	0	0	0	0	0	0	0	13	0	0	0	0	0	13	Fungi{superkingdom}(76);unidentified{phylum}(76);unidentified{class}(76);unidentified{order}(76);unidentified{family}(76);unidentified{genus}(76);unidentified{species}(76)	Fungi	unidentified	unidentified	unidentified	unidentified	unidentified	unidentified
ASV3894	0	0	0	0	0	0	0	0	0	0	0	0	12	0	0	12	Fungi{superkingdom}(60);unidentified{phylum}(60);unidentified{class}(60);unidentified{order}(60);unidentified{family}(60);unidentified{genus}(60);unidentified{species}(60)	Fungi	unidentified	unidentified	unidentified	unidentified	unidentified	unidentified
ASV3897	0	0	0	0	0	0	0	0	133	0	0	0	0	0	0	133	Fungi{superkingdom}(65);Glomeromycota{phylum}(65);Glomeromycetes{class}(65);Glomerales{order}(65);Glomeraceae{family}(65);Glomus{genus}(65);Glomus_cubense{species}(65)	Fungi	Glomeromycota	Glomeromycetes	Glomerales	Glomeraceae	Glomus	Glomus_cubense
ASV3898	0	0	0	0	0	0	0	0	0	133	0	0	0	0	0	133	Fungi{superkingdom}(100);Unassigned{phylum}(0);Unassigned{class}(0);Unassigned{order}(0);Unassigned{family}(0);Unassigned{genus}(0);Unassigned{species}(0)	Fungi	Unassigned	Unassigned	Unassigned	Unassigned	Unassigned	Unassigned
ASV3909	0	0	0	0	0	0	0	0	0	0	0	0	0	16	0	16	Fungi{superkingdom}(61);Ascomycota{phylum}(61);Dothideomycetes{class}(61);Dothideomycetes_ord_Incertae_sedis{order}(61);Eremomycetaceae{family}(61);Arthrographis{genus}(61);unidentified{species}(61)	Fungi	Ascomycota	Dothideomycetes	Dothideomycetes_ord_Incertae_sedis	Eremomycetaceae	Arthrographis	unidentified
ASV3926	0	0	0	0	0	0	0	0	0	0	0	132	0	0	0	132	Fungi{superkingdom}(97);Ascomycota{phylum}(97);Sordariomycetes{class}(97);Hypocreales{order}(97);Nectriaceae{family}(97);Fusarium{genus}(97);Fusarium_solani{species}(97)	Fungi	Ascomycota	Sordariomycetes	Hypocreales	Nectriaceae	Fusarium	Fusarium_solani
ASV3957	0	0	0	0	0	0	0	0	0	15	0	45	0	0	0	60	Fungi{superkingdom}(100);Glomeromycota{phylum}(100);Glomeromycetes{class}(100);Glomerales{order}(100);Glomeraceae{family}(100);Dominikia{genus}(100);unidentified{species}(100)	Fungi	Glomeromycota	Glomeromycetes	Glomerales	Glomeraceae	Dominikia	unidentified
ASV3962	0	0	0	0	0	0	0	0	0	0	13	0	0	0	0	13	Fungi{superkingdom}(100);Unassigned{phylum}(0);Unassigned{class}(0);Unassigned{order}(0);Unassigned{family}(0);Unassigned{genus}(0);Unassigned{species}(0)	Fungi	Unassigned	Unassigned	Unassigned	Unassigned	Unassigned	Unassigned
ASV4000	0	0	26	0	0	0	0	0	0	0	0	0	0	0	0	26	Fungi{superkingdom}(72);unidentified{phylum}(72);unidentified{class}(72);unidentified{order}(72);unidentified{family}(72);unidentified{genus}(72);unidentified{species}(72)	Fungi	unidentified	unidentified	unidentified	unidentified	unidentified	unidentified
ASV4028	0	0	0	0	0	0	0	128	0	0	0	0	0	0	0	128	Fungi{superkingdom}(70);Ascomycota{phylum}(70);Sordariomycetes{class}(70);Hypocreales{order}(70);Stachybotryaceae{family}(70);Paramyrothecium{genus}(70);Paramyrothecium_humicola{species}(70)	Fungi	Ascomycota	Sordariomycetes	Hypocreales	Stachybotryaceae	Paramyrothecium	Paramyrothecium_humicola
ASV4029	0	0	0	0	0	0	0	0	0	0	0	0	43	0	0	43	Fungi{superkingdom}(66);Ascomycota{phylum}(66);unidentified{class}(66);unidentified{order}(66);unidentified{family}(66);unidentified{genus}(66);unidentified{species}(66)	Fungi	Ascomycota	unidentified	unidentified	unidentified	unidentified	unidentified
ASV4057	0	0	0	0	0	0	0	0	0	0	0	0	127	0	0	127	Fungi{superkingdom}(100);Unassigned{phylum}(0);Unassigned{class}(0);Unassigned{order}(0);Unassigned{family}(0);Unassigned{genus}(0);Unassigned{species}(0)	Fungi	Unassigned	Unassigned	Unassigned	Unassigned	Unassigned	Unassigned
ASV4061	0	0	0	0	0	0	0	0	0	0	21	0	0	0	0	21	Fungi{superkingdom}(100);Basidiomycota{phylum}(100);Agaricomycetes{class}(100);Agaricales{order}(100);Stephanosporaceae{family}(100);Lindtneria{genus}(100);unidentified{species}(100)	Fungi	Basidiomycota	Agaricomycetes	Agaricales	Stephanosporaceae	Lindtneria	unidentified
ASV4070	0	0	0	0	0	0	0	0	0	50	0	0	0	0	0	50	Fungi{superkingdom}(68);unidentified{phylum}(68);unidentified{class}(68);unidentified{order}(68);unidentified{family}(68);unidentified{genus}(68);unidentified{species}(68)	Fungi	unidentified	unidentified	unidentified	unidentified	unidentified	unidentified
ASV4085	0	39	0	0	0	0	0	0	0	0	0	0	0	15	0	54	Fungi{superkingdom}(92);Ascomycota{phylum}(92);Sordariomycetes{class}(92);Hypocreales{order}(92);Nectriaceae{family}(92);Fusarium{genus}(92);Fusarium_solani{species}(92)	Fungi	Ascomycota	Sordariomycetes	Hypocreales	Nectriaceae	Fusarium	Fusarium_solani
ASV4094	0	25	0	0	0	0	0	0	0	0	0	0	0	0	0	25	Fungi{superkingdom}(76);Ascomycota{phylum}(76);Unassigned{class}(0);Unassigned{order}(0);Unassigned{family}(0);Unassigned{genus}(0);Unassigned{species}(0)	Fungi	Ascomycota	Unassigned	Unassigned	Unassigned	Unassigned	Unassigned
ASV4121	0	0	0	0	0	0	20	0	0	0	0	0	0	0	0	20	Fungi{superkingdom}(100);Unassigned{phylum}(0);Unassigned{class}(0);Unassigned{order}(0);Unassigned{family}(0);Unassigned{genus}(0);Unassigned{species}(0)	Fungi	Unassigned	Unassigned	Unassigned	Unassigned	Unassigned	Unassigned
ASV4155	17	0	0	0	5	0	0	0	0	0	0	0	0	0	0	22	Fungi{superkingdom}(63);Ascomycota{phylum}(63);Sordariomycetes{class}(63);unidentified{order}(63);unidentified{family}(63);unidentified{genus}(63);unidentified{species}(63)	Fungi	Ascomycota	Sordariomycetes	unidentified	unidentified	unidentified	unidentified
ASV4156	0	0	0	0	3	0	0	0	0	0	0	0	0	0	0	3	Fungi{superkingdom}(69);Ascomycota{phylum}(69);Sordariomycetes{class}(69);Savoryellales{order}(69);Savoryellaceae{family}(69);Savoryella{genus}(69);Savoryella_paucispora{species}(69)	Fungi	Ascomycota	Sordariomycetes	Savoryellales	Savoryellaceae	Savoryella	Savoryella_paucispora
ASV4167	0	95	0	0	0	0	0	0	0	0	0	0	0	0	0	95	Fungi{superkingdom}(97);Glomeromycota{phylum}(97);Glomeromycetes{class}(97);Glomerales{order}(97);Glomeraceae{family}(97);Glomus{genus}(97);unidentified{species}(97)	Fungi	Glomeromycota	Glomeromycetes	Glomerales	Glomeraceae	Glomus	unidentified
ASV4170	0	0	0	0	11	0	0	24	0	0	0	0	0	0	0	35	Fungi{superkingdom}(100);Unassigned{phylum}(0);Unassigned{class}(0);Unassigned{order}(0);Unassigned{family}(0);Unassigned{genus}(0);Unassigned{species}(0)	Fungi	Unassigned	Unassigned	Unassigned	Unassigned	Unassigned	Unassigned
ASV4180	0	0	0	37	0	0	0	0	0	0	0	0	0	0	0	37	Fungi{superkingdom}(100);Basidiomycota{phylum}(100);Agaricomycetes{class}(100);Phallales{order}(100);Phallaceae{family}(100);Lysurus{genus}(100);unidentified{species}(100)	Fungi	Basidiomycota	Agaricomycetes	Phallales	Phallaceae	Lysurus	unidentified
ASV4216	0	0	0	0	0	0	0	0	40	0	0	0	0	0	0	40	Fungi{superkingdom}(98);unidentified{phylum}(98);unidentified{class}(98);unidentified{order}(98);unidentified{family}(98);unidentified{genus}(98);unidentified{species}(98)	Fungi	unidentified	unidentified	unidentified	unidentified	unidentified	unidentified
ASV4232	0	0	0	0	19	0	0	0	0	0	0	0	0	0	0	19	Fungi{superkingdom}(83);Ascomycota{phylum}(83);Dothideomycetes{class}(83);Pleosporales{order}(83);Didymosphaeriaceae{family}(83);Laburnicola{genus}(83);Unassigned{species}(0)	Fungi	Ascomycota	Dothideomycetes	Pleosporales	Didymosphaeriaceae	Laburnicola	Unassigned
ASV4243	0	121	0	0	0	0	0	0	0	0	0	0	0	0	0	121	Fungi{superkingdom}(84);Ascomycota{phylum}(84);Dothideomycetes{class}(84);Botryosphaeriales{order}(84);unidentified{family}(84);unidentified{genus}(84);unidentified{species}(84)	Fungi	Ascomycota	Dothideomycetes	Botryosphaeriales	unidentified	unidentified	unidentified
ASV4244	0	0	0	0	113	0	0	0	0	0	0	0	0	0	0	113	Fungi{superkingdom}(79);unidentified{phylum}(79);unidentified{class}(79);unidentified{order}(79);unidentified{family}(79);unidentified{genus}(79);unidentified{species}(79)	Fungi	unidentified	unidentified	unidentified	unidentified	unidentified	unidentified
ASV4249	0	0	0	0	13	0	0	0	0	0	0	0	0	0	0	13	Fungi{superkingdom}(71);unidentified{phylum}(71);unidentified{class}(71);unidentified{order}(71);unidentified{family}(71);unidentified{genus}(71);unidentified{species}(71)	Fungi	unidentified	unidentified	unidentified	unidentified	unidentified	unidentified
ASV4265	0	0	0	0	0	0	0	0	23	0	0	0	0	0	0	23	Fungi{superkingdom}(81);Ascomycota{phylum}(81);Dothideomycetes{class}(81);Unassigned{order}(0);Unassigned{family}(0);Unassigned{genus}(0);Unassigned{species}(0)	Fungi	Ascomycota	Dothideomycetes	Unassigned	Unassigned	Unassigned	Unassigned
ASV4266	0	0	0	0	0	0	0	0	0	41	0	0	0	0	0	41	Fungi{superkingdom}(67);Ascomycota{phylum}(67);Dothideomycetes{class}(67);Capnodiales{order}(67);Cladosporiaceae{family}(67);Cladosporium{genus}(67);Cladosporium_tenuissimum{species}(67)	Fungi	Ascomycota	Dothideomycetes	Capnodiales	Cladosporiaceae	Cladosporium	Cladosporium_tenuissimum
ASV4289	0	119	0	0	0	0	0	0	0	0	0	0	0	0	0	119	Fungi{superkingdom}(61);Ascomycota{phylum}(61);Eurotiomycetes{class}(61);Chaetothyriales{order}(61);unidentified{family}(61);unidentified{genus}(61);unidentified{species}(61)	Fungi	Ascomycota	Eurotiomycetes	Chaetothyriales	unidentified	unidentified	unidentified
ASV4293	0	34	0	0	0	0	0	0	0	0	0	0	0	0	0	34	Fungi{superkingdom}(70);Ascomycota{phylum}(70);Unassigned{class}(0);Unassigned{order}(0);Unassigned{family}(0);Unassigned{genus}(0);Unassigned{species}(0)	Fungi	Ascomycota	Unassigned	Unassigned	Unassigned	Unassigned	Unassigned
ASV4303	0	30	0	0	0	0	0	0	0	0	0	0	0	0	0	30	Fungi{superkingdom}(96);Kickxellomycota{phylum}(96);Kickxellomycetes{class}(96);Kickxellales{order}(96);Kickxellaceae{family}(96);Ramicandelaber{genus}(96);unidentified{species}(96)	Fungi	Kickxellomycota	Kickxellomycetes	Kickxellales	Kickxellaceae	Ramicandelaber	unidentified
ASV4311	0	0	0	0	0	0	0	0	0	0	0	0	21	0	0	21	Fungi{superkingdom}(92);unidentified{phylum}(92);unidentified{class}(92);unidentified{order}(92);unidentified{family}(92);unidentified{genus}(92);unidentified{species}(92)	Fungi	unidentified	unidentified	unidentified	unidentified	unidentified	unidentified
ASV4347	0	0	0	0	0	0	0	0	117	0	0	0	0	0	0	117	Fungi{superkingdom}(100);Unassigned{phylum}(0);Unassigned{class}(0);Unassigned{order}(0);Unassigned{family}(0);Unassigned{genus}(0);Unassigned{species}(0)	Fungi	Unassigned	Unassigned	Unassigned	Unassigned	Unassigned	Unassigned
ASV4381	0	0	0	0	0	0	0	116	0	0	0	0	0	0	0	116	Fungi{superkingdom}(72);unidentified{phylum}(72);unidentified{class}(72);unidentified{order}(72);unidentified{family}(72);unidentified{genus}(72);unidentified{species}(72)	Fungi	unidentified	unidentified	unidentified	unidentified	unidentified	unidentified
ASV4382	0	0	0	0	0	0	0	0	0	0	0	108	0	0	0	108	Fungi{superkingdom}(90);Basidiomycota{phylum}(90);Agaricomycetes{class}(90);Agaricales{order}(90);unidentified{family}(90);unidentified{genus}(90);unidentified{species}(90)	Fungi	Basidiomycota	Agaricomycetes	Agaricales	unidentified	unidentified	unidentified
ASV4397	0	0	0	0	0	0	0	0	0	0	0	67	0	0	0	67	Fungi{superkingdom}(100);Basidiomycota{phylum}(100);Agaricomycetes{class}(100);Agaricales{order}(100);Psathyrellaceae{family}(100);Coprinopsis{genus}(100);Coprinopsis_rugosobispora{species}(100)	Fungi	Basidiomycota	Agaricomycetes	Agaricales	Psathyrellaceae	Coprinopsis	Coprinopsis_rugosobispora
ASV4421	0	0	0	0	0	0	0	31	0	0	0	0	0	0	0	31	Fungi{superkingdom}(61);unidentified{phylum}(61);unidentified{class}(61);unidentified{order}(61);unidentified{family}(61);unidentified{genus}(61);unidentified{species}(61)	Fungi	unidentified	unidentified	unidentified	unidentified	unidentified	unidentified
ASV4455	0	0	0	0	7	0	0	0	0	0	0	0	0	0	0	7	Fungi{superkingdom}(86);Basidiomycota{phylum}(86);Agaricomycetes{class}(86);Agaricales{order}(86);Lycoperdaceae{family}(86);Calvatia{genus}(86);unidentified{species}(86)	Fungi	Basidiomycota	Agaricomycetes	Agaricales	Lycoperdaceae	Calvatia	unidentified
ASV4485	0	0	0	0	0	0	0	14	0	10	0	0	0	0	0	24	Fungi{superkingdom}(80);unidentified{phylum}(80);unidentified{class}(80);unidentified{order}(80);unidentified{family}(80);unidentified{genus}(80);unidentified{species}(80)	Fungi	unidentified	unidentified	unidentified	unidentified	unidentified	unidentified
ASV4513	0	6	0	0	0	0	0	0	0	0	0	0	0	0	0	6	Fungi{superkingdom}(87);unidentified{phylum}(87);unidentified{class}(87);unidentified{order}(87);unidentified{family}(87);unidentified{genus}(87);unidentified{species}(87)	Fungi	unidentified	unidentified	unidentified	unidentified	unidentified	unidentified
ASV4524	0	0	0	0	0	0	0	0	0	0	0	0	62	0	0	62	Fungi{superkingdom}(92);unidentified{phylum}(92);unidentified{class}(92);unidentified{order}(92);unidentified{family}(92);unidentified{genus}(92);unidentified{species}(92)	Fungi	unidentified	unidentified	unidentified	unidentified	unidentified	unidentified
ASV4526	0	0	0	0	0	0	0	0	0	0	0	0	85	0	0	85	Fungi{superkingdom}(62);Basidiomycota{phylum}(62);Unassigned{class}(0);Unassigned{order}(0);Unassigned{family}(0);Unassigned{genus}(0);Unassigned{species}(0)	Fungi	Basidiomycota	Unassigned	Unassigned	Unassigned	Unassigned	Unassigned
ASV4535	0	0	0	0	0	0	0	16	0	0	0	0	0	0	0	16	Fungi{superkingdom}(89);Glomeromycota{phylum}(89);Glomeromycetes{class}(89);Glomerales{order}(89);Glomeraceae{family}(89);Glomus{genus}(89);Glomus_aggregatum{species}(89)	Fungi	Glomeromycota	Glomeromycetes	Glomerales	Glomeraceae	Glomus	Glomus_aggregatum
ASV4547	0	0	0	0	0	0	0	0	0	111	0	0	0	0	0	111	Fungi{superkingdom}(62);Chytridiomycota{phylum}(62);unidentified{class}(62);unidentified{order}(62);unidentified{family}(62);unidentified{genus}(62);unidentified{species}(62)	Fungi	Chytridiomycota	unidentified	unidentified	unidentified	unidentified	unidentified
ASV4556	0	0	0	0	4	0	0	0	45	0	0	0	0	0	0	49	Fungi{superkingdom}(100);Unassigned{phylum}(0);Unassigned{class}(0);Unassigned{order}(0);Unassigned{family}(0);Unassigned{genus}(0);Unassigned{species}(0)	Fungi	Unassigned	Unassigned	Unassigned	Unassigned	Unassigned	Unassigned
ASV4564	0	0	0	0	0	0	0	0	0	23	0	0	0	0	0	23	Fungi{superkingdom}(100);Basidiomycota{phylum}(100);Agaricomycetes{class}(100);Agaricales{order}(100);Psathyrellaceae{family}(100);Coprinellus{genus}(100);Coprinellus_micaceus{species}(100)	Fungi	Basidiomycota	Agaricomycetes	Agaricales	Psathyrellaceae	Coprinellus	Coprinellus_micaceus
ASV4602	0	0	0	0	0	0	0	0	12	0	0	0	0	0	0	12	Fungi{superkingdom}(71);Basidiomycota{phylum}(71);Agaricomycetes{class}(71);unidentified{order}(71);unidentified{family}(71);unidentified{genus}(71);unidentified{species}(71)	Fungi	Basidiomycota	Agaricomycetes	unidentified	unidentified	unidentified	unidentified
ASV4616	0	0	0	0	0	0	0	0	0	9	0	0	0	0	0	9	Fungi{superkingdom}(76);Ascomycota{phylum}(76);Sordariomycetes{class}(76);Xylariales{order}(76);Xylariales_fam_Incertae_sedis{family}(76);Asteromella{genus}(76);Asteromella_pistaciarum{species}(76)	Fungi	Ascomycota	Sordariomycetes	Xylariales	Xylariales_fam_Incertae_sedis	Asteromella	Asteromella_pistaciarum
ASV4650	0	0	0	0	0	0	0	0	0	0	0	65	0	0	0	65	Fungi{superkingdom}(90);Ascomycota{phylum}(90);Dothideomycetes{class}(90);Capnodiales{order}(90);Cladosporiaceae{family}(90);Cladosporium{genus}(90);Cladosporium_tenuissimum{species}(90)	Fungi	Ascomycota	Dothideomycetes	Capnodiales	Cladosporiaceae	Cladosporium	Cladosporium_tenuissimum
ASV4657	0	88	0	0	0	0	0	0	0	0	0	0	0	0	0	88	Fungi{superkingdom}(100);Unassigned{phylum}(0);Unassigned{class}(0);Unassigned{order}(0);Unassigned{family}(0);Unassigned{genus}(0);Unassigned{species}(0)	Fungi	Unassigned	Unassigned	Unassigned	Unassigned	Unassigned	Unassigned
ASV4664	0	0	0	0	0	0	0	0	0	0	0	0	0	33	0	33	Fungi{superkingdom}(99);Basidiomycota{phylum}(99);Agaricomycetes{class}(99);Agaricales{order}(99);Psathyrellaceae{family}(99);Coprinellus{genus}(99);Coprinellus_radians{species}(99)	Fungi	Basidiomycota	Agaricomycetes	Agaricales	Psathyrellaceae	Coprinellus	Coprinellus_radians
ASV4690	0	0	0	0	0	0	0	24	0	0	0	0	0	0	0	24	Fungi{superkingdom}(100);Unassigned{phylum}(0);Unassigned{class}(0);Unassigned{order}(0);Unassigned{family}(0);Unassigned{genus}(0);Unassigned{species}(0)	Fungi	Unassigned	Unassigned	Unassigned	Unassigned	Unassigned	Unassigned
ASV4694	0	0	0	0	0	0	0	0	0	0	0	0	0	0	31	31	Fungi{superkingdom}(76);unidentified{phylum}(76);unidentified{class}(76);unidentified{order}(76);unidentified{family}(76);unidentified{genus}(76);unidentified{species}(76)	Fungi	unidentified	unidentified	unidentified	unidentified	unidentified	unidentified
ASV4760	0	0	0	0	0	0	29	0	0	0	0	0	0	0	0	29	Fungi{superkingdom}(100);Chytridiomycota{phylum}(100);Spizellomycetes{class}(100);Spizellomycetales{order}(100);Powellomycetaceae{family}(100);Powellomyces{genus}(100);unidentified{species}(100)	Fungi	Chytridiomycota	Spizellomycetes	Spizellomycetales	Powellomycetaceae	Powellomyces	unidentified
ASV4769	0	0	0	0	0	0	0	0	0	0	0	16	0	0	0	16	Fungi{superkingdom}(91);Glomeromycota{phylum}(91);Glomeromycetes{class}(91);Glomerales{order}(91);Glomeraceae{family}(91);Glomus{genus}(91);Glomus_aggregatum{species}(91)	Fungi	Glomeromycota	Glomeromycetes	Glomerales	Glomeraceae	Glomus	Glomus_aggregatum
ASV4787	0	104	0	0	0	0	0	0	0	0	0	0	0	0	0	104	Fungi{superkingdom}(100);Unassigned{phylum}(0);Unassigned{class}(0);Unassigned{order}(0);Unassigned{family}(0);Unassigned{genus}(0);Unassigned{species}(0)	Fungi	Unassigned	Unassigned	Unassigned	Unassigned	Unassigned	Unassigned
ASV4815	0	0	0	0	0	0	0	0	0	0	0	0	0	0	46	46	Fungi{superkingdom}(100);Basidiomycota{phylum}(100);Agaricomycetes{class}(100);Agaricales{order}(100);Entolomataceae{family}(100);Entoloma{genus}(100);Entoloma_rusticoides{species}(100)	Fungi	Basidiomycota	Agaricomycetes	Agaricales	Entolomataceae	Entoloma	Entoloma_rusticoides
ASV4816	0	0	0	0	0	0	0	0	0	0	0	0	0	19	0	19	Fungi{superkingdom}(94);unidentified{phylum}(94);unidentified{class}(94);unidentified{order}(94);unidentified{family}(94);unidentified{genus}(94);unidentified{species}(94)	Fungi	unidentified	unidentified	unidentified	unidentified	unidentified	unidentified
ASV4826	0	78	0	0	0	0	0	0	0	0	0	0	0	0	0	78	Fungi{superkingdom}(73);Ascomycota{phylum}(73);unidentified{class}(73);unidentified{order}(73);unidentified{family}(73);unidentified{genus}(73);unidentified{species}(73)	Fungi	Ascomycota	unidentified	unidentified	unidentified	unidentified	unidentified
ASV4920	0	0	0	0	0	0	0	0	0	0	0	0	2	0	0	2	Fungi{superkingdom}(100);Unassigned{phylum}(0);Unassigned{class}(0);Unassigned{order}(0);Unassigned{family}(0);Unassigned{genus}(0);Unassigned{species}(0)	Fungi	Unassigned	Unassigned	Unassigned	Unassigned	Unassigned	Unassigned
ASV4924	0	0	0	0	0	0	0	0	0	0	0	0	0	0	11	11	Fungi{superkingdom}(95);Basidiomycota{phylum}(95);Agaricomycetes{class}(95);Agaricales{order}(95);Unassigned{family}(0);Unassigned{genus}(0);Unassigned{species}(0)	Fungi	Basidiomycota	Agaricomycetes	Agaricales	Unassigned	Unassigned	Unassigned
ASV4930	0	0	0	0	0	0	0	0	0	0	0	0	22	0	0	22	Fungi{superkingdom}(83);Basidiomycota{phylum}(83);Agaricomycetes{class}(83);Unassigned{order}(0);Unassigned{family}(0);Unassigned{genus}(0);Unassigned{species}(0)	Fungi	Basidiomycota	Agaricomycetes	Unassigned	Unassigned	Unassigned	Unassigned
ASV4931	0	0	0	0	0	0	0	0	0	23	0	0	0	0	0	23	Fungi{superkingdom}(77);Ascomycota{phylum}(77);Eurotiomycetes{class}(77);Chaetothyriales{order}(77);unidentified{family}(77);unidentified{genus}(77);unidentified{species}(77)	Fungi	Ascomycota	Eurotiomycetes	Chaetothyriales	unidentified	unidentified	unidentified
ASV4963	0	0	0	0	0	0	0	0	0	0	0	0	0	0	22	22	Fungi{superkingdom}(73);Basidiomycota{phylum}(73);Agaricomycetes{class}(73);Auriculariales{order}(73);unidentified{family}(73);unidentified{genus}(73);unidentified{species}(73)	Fungi	Basidiomycota	Agaricomycetes	Auriculariales	unidentified	unidentified	unidentified
ASV4983	0	0	6	0	0	0	0	0	0	0	0	0	0	0	0	6	Fungi{superkingdom}(76);Glomeromycota{phylum}(76);Glomeromycetes{class}(76);Glomerales{order}(76);Glomeraceae{family}(76);unidentified{genus}(76);unidentified{species}(76)	Fungi	Glomeromycota	Glomeromycetes	Glomerales	Glomeraceae	unidentified	unidentified
ASV4993	0	0	0	0	0	0	0	0	0	19	0	0	0	0	0	19	Fungi{superkingdom}(100);Unassigned{phylum}(0);Unassigned{class}(0);Unassigned{order}(0);Unassigned{family}(0);Unassigned{genus}(0);Unassigned{species}(0)	Fungi	Unassigned	Unassigned	Unassigned	Unassigned	Unassigned	Unassigned
ASV5002	0	0	0	0	0	0	0	0	0	0	0	0	55	0	0	55	Fungi{superkingdom}(100);Unassigned{phylum}(0);Unassigned{class}(0);Unassigned{order}(0);Unassigned{family}(0);Unassigned{genus}(0);Unassigned{species}(0)	Fungi	Unassigned	Unassigned	Unassigned	Unassigned	Unassigned	Unassigned
ASV5015	0	99	0	0	0	0	0	0	0	0	0	0	0	0	0	99	Fungi{superkingdom}(93);unidentified{phylum}(93);unidentified{class}(93);unidentified{order}(93);unidentified{family}(93);unidentified{genus}(93);unidentified{species}(93)	Fungi	unidentified	unidentified	unidentified	unidentified	unidentified	unidentified
ASV5057	0	46	0	0	0	0	0	0	0	0	0	0	0	0	0	46	Fungi{superkingdom}(92);Ascomycota{phylum}(92);Sordariomycetes{class}(92);Hypocreales{order}(92);Cordycipitaceae{family}(92);Lecanicillium{genus}(92);Lecanicillium_antillanum{species}(92)	Fungi	Ascomycota	Sordariomycetes	Hypocreales	Cordycipitaceae	Lecanicillium	Lecanicillium_antillanum
ASV5063	0	0	0	0	0	0	0	0	0	0	0	98	0	0	0	98	Fungi{superkingdom}(83);unidentified{phylum}(83);unidentified{class}(83);unidentified{order}(83);unidentified{family}(83);unidentified{genus}(83);unidentified{species}(83)	Fungi	unidentified	unidentified	unidentified	unidentified	unidentified	unidentified
ASV5106	0	0	0	0	0	0	0	0	0	0	0	0	97	0	0	97	Fungi{superkingdom}(100);Basidiomycota{phylum}(100);Agaricomycetes{class}(100);Agaricales{order}(100);Bolbitiaceae{family}(100);Conocybe{genus}(100);Unassigned{species}(0)	Fungi	Basidiomycota	Agaricomycetes	Agaricales	Bolbitiaceae	Conocybe	Unassigned
ASV5156	0	0	0	0	5	0	0	0	0	0	0	9	0	0	0	14	Fungi{superkingdom}(100);Unassigned{phylum}(0);Unassigned{class}(0);Unassigned{order}(0);Unassigned{family}(0);Unassigned{genus}(0);Unassigned{species}(0)	Fungi	Unassigned	Unassigned	Unassigned	Unassigned	Unassigned	Unassigned
ASV5164	0	0	0	0	0	0	0	0	0	0	0	0	0	0	42	42	Fungi{superkingdom}(89);Ascomycota{phylum}(89);Sordariomycetes{class}(89);Xylariales{order}(89);Unassigned{family}(0);Unassigned{genus}(0);Unassigned{species}(0)	Fungi	Ascomycota	Sordariomycetes	Xylariales	Unassigned	Unassigned	Unassigned
ASV5215	0	0	0	0	0	0	0	0	0	95	0	0	0	0	0	95	Fungi{superkingdom}(100);Unassigned{phylum}(0);Unassigned{class}(0);Unassigned{order}(0);Unassigned{family}(0);Unassigned{genus}(0);Unassigned{species}(0)	Fungi	Unassigned	Unassigned	Unassigned	Unassigned	Unassigned	Unassigned
ASV5220	0	0	0	0	0	0	0	0	0	0	9	0	0	0	0	9	Fungi{superkingdom}(100);Unassigned{phylum}(0);Unassigned{class}(0);Unassigned{order}(0);Unassigned{family}(0);Unassigned{genus}(0);Unassigned{species}(0)	Fungi	Unassigned	Unassigned	Unassigned	Unassigned	Unassigned	Unassigned
ASV5257	0	0	0	94	0	0	0	0	0	0	0	0	0	0	0	94	Fungi{superkingdom}(90);Ascomycota{phylum}(90);Sordariomycetes{class}(90);Hypocreales{order}(90);Nectriaceae{family}(90);Fusarium{genus}(90);Fusarium_solani{species}(90)	Fungi	Ascomycota	Sordariomycetes	Hypocreales	Nectriaceae	Fusarium	Fusarium_solani
ASV5282	10	0	0	0	0	0	0	0	0	0	0	0	0	0	0	10	Fungi{superkingdom}(100);Unassigned{phylum}(0);Unassigned{class}(0);Unassigned{order}(0);Unassigned{family}(0);Unassigned{genus}(0);Unassigned{species}(0)	Fungi	Unassigned	Unassigned	Unassigned	Unassigned	Unassigned	Unassigned
ASV5328	0	0	0	0	0	15	0	0	0	0	0	0	0	0	0	15	Fungi{superkingdom}(63);unidentified{phylum}(63);unidentified{class}(63);unidentified{order}(63);unidentified{family}(63);unidentified{genus}(63);unidentified{species}(63)	Fungi	unidentified	unidentified	unidentified	unidentified	unidentified	unidentified
ASV5337	0	0	0	0	0	0	11	0	0	0	0	0	0	0	0	11	Fungi{superkingdom}(90);unidentified{phylum}(90);unidentified{class}(90);unidentified{order}(90);unidentified{family}(90);unidentified{genus}(90);unidentified{species}(90)	Fungi	unidentified	unidentified	unidentified	unidentified	unidentified	unidentified
ASV5359	0	92	0	0	0	0	0	0	0	0	0	0	0	0	0	92	Fungi{superkingdom}(74);unidentified{phylum}(74);unidentified{class}(74);unidentified{order}(74);unidentified{family}(74);unidentified{genus}(74);unidentified{species}(74)	Fungi	unidentified	unidentified	unidentified	unidentified	unidentified	unidentified
ASV5360	0	0	0	0	0	0	0	0	0	33	0	0	0	0	0	33	Fungi{superkingdom}(97);unidentified{phylum}(97);unidentified{class}(97);unidentified{order}(97);unidentified{family}(97);unidentified{genus}(97);unidentified{species}(97)	Fungi	unidentified	unidentified	unidentified	unidentified	unidentified	unidentified
ASV5366	0	0	0	0	0	0	0	0	92	0	0	0	0	0	0	92	Fungi{superkingdom}(100);Ascomycota{phylum}(100);Pezizomycetes{class}(100);Pezizales{order}(100);Pezizaceae{family}(100);Mattirolomyces{genus}(100);Mattirolomyces_terfezioides{species}(100)	Fungi	Ascomycota	Pezizomycetes	Pezizales	Pezizaceae	Mattirolomyces	Mattirolomyces_terfezioides
ASV5397	0	0	0	0	0	0	0	0	0	0	0	0	0	0	44	44	Fungi{superkingdom}(64);unidentified{phylum}(64);unidentified{class}(64);unidentified{order}(64);unidentified{family}(64);unidentified{genus}(64);unidentified{species}(64)	Fungi	unidentified	unidentified	unidentified	unidentified	unidentified	unidentified
ASV5398	0	0	0	0	0	0	0	0	0	0	0	0	82	0	0	82	Fungi{superkingdom}(100);Unassigned{phylum}(0);Unassigned{class}(0);Unassigned{order}(0);Unassigned{family}(0);Unassigned{genus}(0);Unassigned{species}(0)	Fungi	Unassigned	Unassigned	Unassigned	Unassigned	Unassigned	Unassigned
ASV5399	0	0	0	0	0	0	87	0	0	0	0	0	0	0	0	87	Fungi{superkingdom}(71);Ascomycota{phylum}(71);Dothideomycetes{class}(71);Pleosporales{order}(71);Lophiostomataceae{family}(71);Lophiostoma{genus}(71);Lophiostoma_rosae{species}(71)	Fungi	Ascomycota	Dothideomycetes	Pleosporales	Lophiostomataceae	Lophiostoma	Lophiostoma_rosae
ASV5421	0	0	19	0	0	0	0	0	0	0	0	0	0	0	0	19	Fungi{superkingdom}(100);Glomeromycota{phylum}(100);Glomeromycetes{class}(100);Glomerales{order}(100);Glomeraceae{family}(100);Dominikia{genus}(100);Dominikia_iranica{species}(100)	Fungi	Glomeromycota	Glomeromycetes	Glomerales	Glomeraceae	Dominikia	Dominikia_iranica
ASV5422	0	0	0	4	0	0	0	0	0	0	0	0	0	0	51	55	Fungi{superkingdom}(62);unidentified{phylum}(62);unidentified{class}(62);unidentified{order}(62);unidentified{family}(62);unidentified{genus}(62);unidentified{species}(62)	Fungi	unidentified	unidentified	unidentified	unidentified	unidentified	unidentified
ASV5429	0	0	0	0	0	0	0	51	0	0	0	0	0	0	0	51	Fungi{superkingdom}(66);Glomeromycota{phylum}(66);Glomeromycetes{class}(66);Glomerales{order}(66);Glomeraceae{family}(66);Glomus{genus}(66);Glomus_cubense{species}(66)	Fungi	Glomeromycota	Glomeromycetes	Glomerales	Glomeraceae	Glomus	Glomus_cubense
ASV5448	0	0	0	0	0	0	7	0	0	0	0	0	0	0	0	7	Fungi{superkingdom}(68);Ascomycota{phylum}(68);Dothideomycetes{class}(68);Capnodiales{order}(68);Teratosphaeriaceae{family}(68);Unassigned{genus}(0);Unassigned{species}(0)	Fungi	Ascomycota	Dothideomycetes	Capnodiales	Teratosphaeriaceae	Unassigned	Unassigned
ASV5497	0	0	0	0	0	0	0	0	0	0	0	0	0	19	0	19	Fungi{superkingdom}(100);Unassigned{phylum}(0);Unassigned{class}(0);Unassigned{order}(0);Unassigned{family}(0);Unassigned{genus}(0);Unassigned{species}(0)	Fungi	Unassigned	Unassigned	Unassigned	Unassigned	Unassigned	Unassigned
ASV5509	0	0	0	0	0	0	0	0	0	23	0	0	0	0	0	23	Fungi{superkingdom}(95);unidentified{phylum}(95);unidentified{class}(95);unidentified{order}(95);unidentified{family}(95);unidentified{genus}(95);unidentified{species}(95)	Fungi	unidentified	unidentified	unidentified	unidentified	unidentified	unidentified
ASV5517	0	0	11	0	0	0	0	0	0	0	0	0	0	0	0	11	Fungi{superkingdom}(80);Ascomycota{phylum}(80);Sordariomycetes{class}(80);Sordariales{order}(80);Lasiosphaeriaceae{family}(80);Schizothecium{genus}(80);Schizothecium_inaequale{species}(80)	Fungi	Ascomycota	Sordariomycetes	Sordariales	Lasiosphaeriaceae	Schizothecium	Schizothecium_inaequale
ASV5519	0	0	0	0	0	0	0	0	0	0	13	0	0	0	0	13	Fungi{superkingdom}(78);Basidiomycota{phylum}(78);Agaricostilbomycetes{class}(78);Agaricostilbales{order}(78);Chionosphaeraceae{family}(78);Kurtzmanomyces{genus}(78);Kurtzmanomyces_tardus{species}(78)	Fungi	Basidiomycota	Agaricostilbomycetes	Agaricostilbales	Chionosphaeraceae	Kurtzmanomyces	Kurtzmanomyces_tardus
ASV5530	0	0	0	0	0	0	0	0	0	0	31	0	0	0	0	31	Fungi{superkingdom}(90);Basidiomycota{phylum}(90);Tremellomycetes{class}(90);Filobasidiales{order}(90);Filobasidiaceae{family}(90);Naganishia{genus}(90);Naganishia_adeliensis{species}(90)	Fungi	Basidiomycota	Tremellomycetes	Filobasidiales	Filobasidiaceae	Naganishia	Naganishia_adeliensis
ASV5538	10	0	0	0	0	0	0	0	0	0	0	0	0	0	0	10	Fungi{superkingdom}(98);Ascomycota{phylum}(98);Sordariomycetes{class}(98);Hypocreales{order}(98);Bionectriaceae{family}(98);Hydropisphaera{genus}(98);unidentified{species}(98)	Fungi	Ascomycota	Sordariomycetes	Hypocreales	Bionectriaceae	Hydropisphaera	unidentified
ASV5546	0	0	0	0	0	0	0	0	0	0	0	0	89	0	0	89	Fungi{superkingdom}(89);Mortierellomycota{phylum}(89);Mortierellomycetes{class}(89);Mortierellales{order}(89);Mortierellaceae{family}(89);Mortierella{genus}(89);Unassigned{species}(0)	Fungi	Mortierellomycota	Mortierellomycetes	Mortierellales	Mortierellaceae	Mortierella	Unassigned
ASV5549	0	0	0	0	0	0	0	0	0	0	0	0	0	0	30	30	Fungi{superkingdom}(100);Chytridiomycota{phylum}(100);Spizellomycetes{class}(100);Spizellomycetales{order}(100);Spizellomycetaceae{family}(100);Spizellomyces{genus}(100);Spizellomyces_dolichospermus{species}(100)	Fungi	Chytridiomycota	Spizellomycetes	Spizellomycetales	Spizellomycetaceae	Spizellomyces	Spizellomyces_dolichospermus
ASV5556	0	0	0	0	0	0	0	23	0	0	0	0	0	0	0	23	Fungi{superkingdom}(100);Unassigned{phylum}(0);Unassigned{class}(0);Unassigned{order}(0);Unassigned{family}(0);Unassigned{genus}(0);Unassigned{species}(0)	Fungi	Unassigned	Unassigned	Unassigned	Unassigned	Unassigned	Unassigned
ASV5565	0	0	0	0	0	0	0	0	32	0	0	0	0	0	0	32	Fungi{superkingdom}(68);Ascomycota{phylum}(68);Sordariomycetes{class}(68);Hypocreales{order}(68);Bionectriaceae{family}(68);Hydropisphaera{genus}(68);Hydropisphaera_fungicola{species}(68)	Fungi	Ascomycota	Sordariomycetes	Hypocreales	Bionectriaceae	Hydropisphaera	Hydropisphaera_fungicola
ASV5600	0	0	0	7	0	0	0	0	0	10	0	0	11	0	0	28	Fungi{superkingdom}(94);Ascomycota{phylum}(94);Dothideomycetes{class}(94);Pleosporales{order}(94);Torulaceae{family}(94);Torula{genus}(94);unidentified{species}(94)	Fungi	Ascomycota	Dothideomycetes	Pleosporales	Torulaceae	Torula	unidentified
ASV5602	0	0	0	0	0	0	0	0	0	0	11	0	0	0	0	11	Fungi{superkingdom}(100);Unassigned{phylum}(0);Unassigned{class}(0);Unassigned{order}(0);Unassigned{family}(0);Unassigned{genus}(0);Unassigned{species}(0)	Fungi	Unassigned	Unassigned	Unassigned	Unassigned	Unassigned	Unassigned
ASV5611	0	0	0	0	0	0	0	0	0	0	0	0	0	0	88	88	Fungi{superkingdom}(77);Ascomycota{phylum}(77);Sordariomycetes{class}(77);Hypocreales{order}(77);Nectriaceae{family}(77);Gibberella{genus}(77);Gibberella_avenacea{species}(77)	Fungi	Ascomycota	Sordariomycetes	Hypocreales	Nectriaceae	Gibberella	Gibberella_avenacea
ASV5631	0	0	25	0	0	0	0	0	0	0	0	0	0	0	0	25	Fungi{superkingdom}(76);Glomeromycota{phylum}(76);Glomeromycetes{class}(76);Glomerales{order}(76);Glomeraceae{family}(76);Unassigned{genus}(0);Unassigned{species}(0)	Fungi	Glomeromycota	Glomeromycetes	Glomerales	Glomeraceae	Unassigned	Unassigned
ASV5632	0	0	0	0	0	0	17	27	0	0	0	0	0	0	0	44	Fungi{superkingdom}(62);Basidiomycota{phylum}(62);Agaricomycetes{class}(62);Agaricales{order}(62);unidentified{family}(62);unidentified{genus}(62);unidentified{species}(62)	Fungi	Basidiomycota	Agaricomycetes	Agaricales	unidentified	unidentified	unidentified
ASV5634	0	0	0	0	9	0	0	0	0	0	0	0	0	0	0	9	Fungi{superkingdom}(98);Ascomycota{phylum}(98);Eurotiomycetes{class}(98);Chaetothyriales{order}(98);unidentified{family}(98);unidentified{genus}(98);unidentified{species}(98)	Fungi	Ascomycota	Eurotiomycetes	Chaetothyriales	unidentified	unidentified	unidentified
ASV5635	0	0	0	0	0	21	0	0	0	0	0	0	0	0	0	21	Fungi{superkingdom}(90);unidentified{phylum}(90);unidentified{class}(90);unidentified{order}(90);unidentified{family}(90);unidentified{genus}(90);unidentified{species}(90)	Fungi	unidentified	unidentified	unidentified	unidentified	unidentified	unidentified
ASV5639	0	0	0	0	20	0	0	0	0	0	0	0	0	0	0	20	Fungi{superkingdom}(69);unidentified{phylum}(69);unidentified{class}(69);unidentified{order}(69);unidentified{family}(69);unidentified{genus}(69);unidentified{species}(69)	Fungi	unidentified	unidentified	unidentified	unidentified	unidentified	unidentified
ASV5662	0	87	0	0	0	0	0	0	0	0	0	0	0	0	0	87	Fungi{superkingdom}(74);Ascomycota{phylum}(74);unidentified{class}(74);unidentified{order}(74);unidentified{family}(74);unidentified{genus}(74);unidentified{species}(74)	Fungi	Ascomycota	unidentified	unidentified	unidentified	unidentified	unidentified
ASV5671	0	0	0	0	0	0	0	87	0	0	0	0	0	0	0	87	Fungi{superkingdom}(100);Unassigned{phylum}(0);Unassigned{class}(0);Unassigned{order}(0);Unassigned{family}(0);Unassigned{genus}(0);Unassigned{species}(0)	Fungi	Unassigned	Unassigned	Unassigned	Unassigned	Unassigned	Unassigned
ASV5677	0	0	0	0	0	0	12	0	0	0	0	0	0	0	0	12	Fungi{superkingdom}(100);Ascomycota{phylum}(100);Sordariomycetes{class}(100);Microascales{order}(100);Microascaceae{family}(100);Kernia{genus}(100);Kernia_geniculotricha{species}(100)	Fungi	Ascomycota	Sordariomycetes	Microascales	Microascaceae	Kernia	Kernia_geniculotricha
ASV5685	27	0	0	0	0	0	0	0	0	0	0	0	0	0	0	27	Fungi{superkingdom}(100);Chytridiomycota{phylum}(100);GS13{class}(100);unidentified{order}(100);unidentified{family}(100);unidentified{genus}(100);unidentified{species}(100)	Fungi	Chytridiomycota	GS13	unidentified	unidentified	unidentified	unidentified
ASV5686	6	15	0	0	0	0	0	0	0	0	0	0	0	0	15	36	Fungi{superkingdom}(62);Basidiomycota{phylum}(62);Tremellomycetes{class}(62);Tremellales{order}(62);Bulleribasidiaceae{family}(62);Dioszegia{genus}(62);Unassigned{species}(0)	Fungi	Basidiomycota	Tremellomycetes	Tremellales	Bulleribasidiaceae	Dioszegia	Unassigned
ASV5729	6	0	0	0	0	0	0	0	0	0	0	0	0	0	0	6	Fungi{superkingdom}(74);Ascomycota{phylum}(74);Unassigned{class}(0);Unassigned{order}(0);Unassigned{family}(0);Unassigned{genus}(0);Unassigned{species}(0)	Fungi	Ascomycota	Unassigned	Unassigned	Unassigned	Unassigned	Unassigned
ASV5730	0	29	0	0	0	0	0	0	0	0	0	0	0	0	0	29	Fungi{superkingdom}(80);unidentified{phylum}(80);unidentified{class}(80);unidentified{order}(80);unidentified{family}(80);unidentified{genus}(80);unidentified{species}(80)	Fungi	unidentified	unidentified	unidentified	unidentified	unidentified	unidentified
ASV5738	0	0	0	0	0	29	0	0	0	0	0	0	0	0	0	29	Fungi{superkingdom}(98);Basidiomycota{phylum}(98);Tremellomycetes{class}(98);Filobasidiales{order}(98);Filobasidiaceae{family}(98);Filobasidium{genus}(98);Filobasidium_chernovii{species}(98)	Fungi	Basidiomycota	Tremellomycetes	Filobasidiales	Filobasidiaceae	Filobasidium	Filobasidium_chernovii
ASV5741	0	0	0	0	0	0	0	0	0	0	0	86	0	0	0	86	Fungi{superkingdom}(96);unidentified{phylum}(96);unidentified{class}(96);unidentified{order}(96);unidentified{family}(96);unidentified{genus}(96);unidentified{species}(96)	Fungi	unidentified	unidentified	unidentified	unidentified	unidentified	unidentified
ASV5756	0	0	0	0	0	0	0	0	0	0	0	28	0	0	0	28	Fungi{superkingdom}(100);Unassigned{phylum}(0);Unassigned{class}(0);Unassigned{order}(0);Unassigned{family}(0);Unassigned{genus}(0);Unassigned{species}(0)	Fungi	Unassigned	Unassigned	Unassigned	Unassigned	Unassigned	Unassigned
ASV5807	0	0	0	0	0	28	0	0	0	0	0	0	0	0	0	28	Fungi{superkingdom}(67);unidentified{phylum}(67);unidentified{class}(67);unidentified{order}(67);unidentified{family}(67);unidentified{genus}(67);unidentified{species}(67)	Fungi	unidentified	unidentified	unidentified	unidentified	unidentified	unidentified
ASV5810	0	0	0	0	0	0	0	0	0	0	0	0	0	0	20	20	Fungi{superkingdom}(98);Basidiomycota{phylum}(98);Tremellomycetes{class}(98);Filobasidiales{order}(98);Filobasidiaceae{family}(98);Filobasidium{genus}(98);Filobasidium_chernovii{species}(98)	Fungi	Basidiomycota	Tremellomycetes	Filobasidiales	Filobasidiaceae	Filobasidium	Filobasidium_chernovii
ASV5831	0	0	0	0	0	0	0	0	0	0	0	0	0	68	0	68	Fungi{superkingdom}(100);Unassigned{phylum}(0);Unassigned{class}(0);Unassigned{order}(0);Unassigned{family}(0);Unassigned{genus}(0);Unassigned{species}(0)	Fungi	Unassigned	Unassigned	Unassigned	Unassigned	Unassigned	Unassigned
ASV5854	0	0	0	0	45	0	0	0	0	0	0	0	0	0	0	45	Fungi{superkingdom}(73);Basidiomycota{phylum}(73);Agaricomycetes{class}(73);unidentified{order}(73);unidentified{family}(73);unidentified{genus}(73);unidentified{species}(73)	Fungi	Basidiomycota	Agaricomycetes	unidentified	unidentified	unidentified	unidentified
ASV5863	0	84	0	0	0	0	0	0	0	0	0	0	0	0	0	84	Fungi{superkingdom}(100);Unassigned{phylum}(0);Unassigned{class}(0);Unassigned{order}(0);Unassigned{family}(0);Unassigned{genus}(0);Unassigned{species}(0)	Fungi	Unassigned	Unassigned	Unassigned	Unassigned	Unassigned	Unassigned
ASV5872	0	0	0	0	0	0	0	0	0	0	0	64	0	0	0	64	Fungi{superkingdom}(99);unidentified{phylum}(99);unidentified{class}(99);unidentified{order}(99);unidentified{family}(99);unidentified{genus}(99);unidentified{species}(99)	Fungi	unidentified	unidentified	unidentified	unidentified	unidentified	unidentified
ASV5873	0	0	0	0	0	0	0	0	84	0	0	0	0	0	0	84	Fungi{superkingdom}(92);Basidiomycota{phylum}(92);Tremellomycetes{class}(92);Filobasidiales{order}(92);Filobasidiaceae{family}(92);Filobasidium{genus}(92);Unassigned{species}(0)	Fungi	Basidiomycota	Tremellomycetes	Filobasidiales	Filobasidiaceae	Filobasidium	Unassigned
ASV5918	0	0	0	0	0	0	0	0	49	0	0	0	0	0	0	49	Fungi{superkingdom}(76);Ascomycota{phylum}(76);Unassigned{class}(0);Unassigned{order}(0);Unassigned{family}(0);Unassigned{genus}(0);Unassigned{species}(0)	Fungi	Ascomycota	Unassigned	Unassigned	Unassigned	Unassigned	Unassigned
ASV5943	0	0	0	0	0	0	0	0	0	0	0	83	0	0	0	83	Fungi{superkingdom}(70);Basidiomycota{phylum}(70);Agaricomycetes{class}(70);Cantharellales{order}(70);Ceratobasidiaceae{family}(70);Ceratobasidium{genus}(70);unidentified{species}(70)	Fungi	Basidiomycota	Agaricomycetes	Cantharellales	Ceratobasidiaceae	Ceratobasidium	unidentified
ASV5968	0	0	0	0	31	0	0	0	0	0	0	0	0	0	0	31	Fungi{superkingdom}(86);Ascomycota{phylum}(86);Sordariomycetes{class}(86);unidentified{order}(86);unidentified{family}(86);unidentified{genus}(86);unidentified{species}(86)	Fungi	Ascomycota	Sordariomycetes	unidentified	unidentified	unidentified	unidentified
ASV6010	0	0	0	0	0	0	0	0	0	0	0	0	0	20	0	20	Fungi{superkingdom}(81);unidentified{phylum}(81);unidentified{class}(81);unidentified{order}(81);unidentified{family}(81);unidentified{genus}(81);unidentified{species}(81)	Fungi	unidentified	unidentified	unidentified	unidentified	unidentified	unidentified
ASV6023	0	0	0	0	0	0	0	0	0	0	22	0	0	10	0	32	Fungi{superkingdom}(87);unidentified{phylum}(87);unidentified{class}(87);unidentified{order}(87);unidentified{family}(87);unidentified{genus}(87);unidentified{species}(87)	Fungi	unidentified	unidentified	unidentified	unidentified	unidentified	unidentified
ASV6028	0	30	0	0	0	0	0	0	0	0	0	0	0	0	0	30	Fungi{superkingdom}(77);unidentified{phylum}(77);unidentified{class}(77);unidentified{order}(77);unidentified{family}(77);unidentified{genus}(77);unidentified{species}(77)	Fungi	unidentified	unidentified	unidentified	unidentified	unidentified	unidentified
ASV6029	0	0	18	0	0	0	0	0	0	0	0	0	0	0	0	18	Fungi{superkingdom}(75);unidentified{phylum}(75);unidentified{class}(75);unidentified{order}(75);unidentified{family}(75);unidentified{genus}(75);unidentified{species}(75)	Fungi	unidentified	unidentified	unidentified	unidentified	unidentified	unidentified
ASV6036	0	0	0	0	0	0	0	0	0	0	0	0	46	0	0	46	Fungi{superkingdom}(100);Mortierellomycota{phylum}(100);Mortierellomycetes{class}(100);Mortierellales{order}(100);Mortierellaceae{family}(100);Mortierella{genus}(100);Mortierella_wolfii{species}(100)	Fungi	Mortierellomycota	Mortierellomycetes	Mortierellales	Mortierellaceae	Mortierella	Mortierella_wolfii
ASV6058	0	81	0	0	0	0	0	0	0	0	0	0	0	0	0	81	Fungi{superkingdom}(85);unidentified{phylum}(85);unidentified{class}(85);unidentified{order}(85);unidentified{family}(85);unidentified{genus}(85);unidentified{species}(85)	Fungi	unidentified	unidentified	unidentified	unidentified	unidentified	unidentified
ASV6107	0	0	0	0	0	7	0	0	0	23	0	0	0	0	0	30	Fungi{superkingdom}(99);unidentified{phylum}(99);unidentified{class}(99);unidentified{order}(99);unidentified{family}(99);unidentified{genus}(99);unidentified{species}(99)	Fungi	unidentified	unidentified	unidentified	unidentified	unidentified	unidentified
ASV6145	0	0	0	0	0	0	0	80	0	0	0	0	0	0	0	80	Fungi{superkingdom}(63);unidentified{phylum}(63);unidentified{class}(63);unidentified{order}(63);unidentified{family}(63);unidentified{genus}(63);unidentified{species}(63)	Fungi	unidentified	unidentified	unidentified	unidentified	unidentified	unidentified
ASV6147	0	0	0	0	0	0	0	0	80	0	0	0	0	0	0	80	Fungi{superkingdom}(99);Ascomycota{phylum}(99);Sordariomycetes{class}(99);Xylariales{order}(99);Diatrypaceae{family}(99);Monosporascus{genus}(99);Monosporascus_cannonballus{species}(99)	Fungi	Ascomycota	Sordariomycetes	Xylariales	Diatrypaceae	Monosporascus	Monosporascus_cannonballus
ASV6149	0	0	0	0	0	0	0	0	0	0	0	80	0	0	0	80	Fungi{superkingdom}(94);unidentified{phylum}(94);unidentified{class}(94);unidentified{order}(94);unidentified{family}(94);unidentified{genus}(94);unidentified{species}(94)	Fungi	unidentified	unidentified	unidentified	unidentified	unidentified	unidentified
ASV6172	0	0	0	0	0	0	0	0	0	0	42	0	0	0	0	42	Fungi{superkingdom}(100);Unassigned{phylum}(0);Unassigned{class}(0);Unassigned{order}(0);Unassigned{family}(0);Unassigned{genus}(0);Unassigned{species}(0)	Fungi	Unassigned	Unassigned	Unassigned	Unassigned	Unassigned	Unassigned
ASV6193	0	0	0	0	0	0	0	0	0	0	0	35	0	0	0	35	Fungi{superkingdom}(91);Mortierellomycota{phylum}(91);Mortierellomycetes{class}(91);Mortierellales{order}(91);Mortierellaceae{family}(91);Mortierella{genus}(91);Mortierella_polygonia{species}(91)	Fungi	Mortierellomycota	Mortierellomycetes	Mortierellales	Mortierellaceae	Mortierella	Mortierella_polygonia
ASV6229	0	0	0	0	0	0	27	0	0	0	0	0	0	0	0	27	Fungi{superkingdom}(96);Ascomycota{phylum}(96);Sordariomycetes{class}(96);Sordariales{order}(96);Chaetomiaceae{family}(96);unidentified{genus}(96);unidentified{species}(96)	Fungi	Ascomycota	Sordariomycetes	Sordariales	Chaetomiaceae	unidentified	unidentified
ASV6230	0	0	0	0	0	0	0	0	0	0	0	0	48	0	0	48	Fungi{superkingdom}(83);Ascomycota{phylum}(83);Dothideomycetes{class}(83);Capnodiales{order}(83);Unassigned{family}(0);Unassigned{genus}(0);Unassigned{species}(0)	Fungi	Ascomycota	Dothideomycetes	Capnodiales	Unassigned	Unassigned	Unassigned
ASV6305	0	0	0	0	0	0	0	24	0	0	0	0	0	0	0	24	Fungi{superkingdom}(100);Unassigned{phylum}(0);Unassigned{class}(0);Unassigned{order}(0);Unassigned{family}(0);Unassigned{genus}(0);Unassigned{species}(0)	Fungi	Unassigned	Unassigned	Unassigned	Unassigned	Unassigned	Unassigned
ASV6310	0	0	0	0	0	0	0	0	0	0	0	78	0	0	0	78	Fungi{superkingdom}(96);unidentified{phylum}(96);unidentified{class}(96);unidentified{order}(96);unidentified{family}(96);unidentified{genus}(96);unidentified{species}(96)	Fungi	unidentified	unidentified	unidentified	unidentified	unidentified	unidentified
ASV6336	0	14	0	0	0	0	0	0	0	0	0	0	0	0	0	14	Fungi{superkingdom}(91);Glomeromycota{phylum}(91);Glomeromycetes{class}(91);Glomerales{order}(91);Glomeraceae{family}(91);Glomus{genus}(91);Glomus_cubense{species}(91)	Fungi	Glomeromycota	Glomeromycetes	Glomerales	Glomeraceae	Glomus	Glomus_cubense
ASV6356	0	0	0	0	0	0	0	0	0	0	0	0	0	12	0	12	Fungi{superkingdom}(98);unidentified{phylum}(98);unidentified{class}(98);unidentified{order}(98);unidentified{family}(98);unidentified{genus}(98);unidentified{species}(98)	Fungi	unidentified	unidentified	unidentified	unidentified	unidentified	unidentified
ASV6371	0	0	0	0	0	0	0	0	0	0	0	52	0	0	0	52	Fungi{superkingdom}(77);Basidiomycota{phylum}(77);Agaricomycetes{class}(77);Agaricales{order}(77);Agaricaceae{family}(77);Tulostoma{genus}(77);unidentified{species}(77)	Fungi	Basidiomycota	Agaricomycetes	Agaricales	Agaricaceae	Tulostoma	unidentified
ASV6377	0	77	0	0	0	0	0	0	0	0	0	0	0	0	0	77	Fungi{superkingdom}(100);Ascomycota{phylum}(100);Dothideomycetes{class}(100);Pleosporales{order}(100);Coniothyriaceae{family}(100);Coniothyrium{genus}(100);unidentified{species}(100)	Fungi	Ascomycota	Dothideomycetes	Pleosporales	Coniothyriaceae	Coniothyrium	unidentified
ASV6378	0	0	0	33	0	0	0	0	0	0	0	0	0	0	0	33	Fungi{superkingdom}(91);Ascomycota{phylum}(91);Eurotiomycetes{class}(91);Chaetothyriales{order}(91);Trichomeriaceae{family}(91);Knufia{genus}(91);Knufia_marmoricola{species}(91)	Fungi	Ascomycota	Eurotiomycetes	Chaetothyriales	Trichomeriaceae	Knufia	Knufia_marmoricola
ASV6388	0	0	0	0	0	77	0	0	0	0	0	0	0	0	0	77	Fungi{superkingdom}(63);unidentified{phylum}(63);unidentified{class}(63);unidentified{order}(63);unidentified{family}(63);unidentified{genus}(63);unidentified{species}(63)	Fungi	unidentified	unidentified	unidentified	unidentified	unidentified	unidentified
ASV6389	0	0	0	0	0	0	0	77	0	0	0	0	0	0	0	77	Fungi{superkingdom}(100);Unassigned{phylum}(0);Unassigned{class}(0);Unassigned{order}(0);Unassigned{family}(0);Unassigned{genus}(0);Unassigned{species}(0)	Fungi	Unassigned	Unassigned	Unassigned	Unassigned	Unassigned	Unassigned
ASV6392	0	0	0	0	0	0	0	0	0	0	0	77	0	0	0	77	Fungi{superkingdom}(93);unidentified{phylum}(93);unidentified{class}(93);unidentified{order}(93);unidentified{family}(93);unidentified{genus}(93);unidentified{species}(93)	Fungi	unidentified	unidentified	unidentified	unidentified	unidentified	unidentified
ASV6446	0	0	0	0	0	0	0	0	0	0	0	29	0	0	0	29	Fungi{superkingdom}(93);Ascomycota{phylum}(93);Archaeorhizomycetes{class}(93);Archaeorhizomycetales{order}(93);Archaeorhizomycetaceae{family}(93);Archaeorhizomyces{genus}(93);unidentified{species}(93)	Fungi	Ascomycota	Archaeorhizomycetes	Archaeorhizomycetales	Archaeorhizomycetaceae	Archaeorhizomyces	unidentified
ASV6451	0	0	0	0	0	0	0	0	0	0	0	0	0	7	0	7	Fungi{superkingdom}(70);unidentified{phylum}(70);unidentified{class}(70);unidentified{order}(70);unidentified{family}(70);unidentified{genus}(70);unidentified{species}(70)	Fungi	unidentified	unidentified	unidentified	unidentified	unidentified	unidentified
ASV6474	0	0	0	0	0	0	0	0	0	0	25	0	0	0	0	25	Fungi{superkingdom}(94);Basidiomycota{phylum}(94);Agaricomycetes{class}(94);Agaricales{order}(94);Stephanosporaceae{family}(94);Lindtneria{genus}(94);unidentified{species}(94)	Fungi	Basidiomycota	Agaricomycetes	Agaricales	Stephanosporaceae	Lindtneria	unidentified
ASV6477	0	0	0	0	0	0	0	0	0	0	0	54	0	0	0	54	Fungi{superkingdom}(83);Ascomycota{phylum}(83);Dothideomycetes{class}(83);Pleosporales{order}(83);Phaeosphaeriaceae{family}(83);Neosetophoma{genus}(83);Neosetophoma_samararum{species}(83)	Fungi	Ascomycota	Dothideomycetes	Pleosporales	Phaeosphaeriaceae	Neosetophoma	Neosetophoma_samararum
ASV6478	0	0	0	0	0	0	0	0	47	0	0	29	0	0	0	76	Fungi{superkingdom}(67);Ascomycota{phylum}(67);Sordariomycetes{class}(67);Sordariales{order}(67);Unassigned{family}(0);Unassigned{genus}(0);Unassigned{species}(0)	Fungi	Ascomycota	Sordariomycetes	Sordariales	Unassigned	Unassigned	Unassigned
ASV6481	0	0	0	0	0	0	0	0	0	0	76	0	0	0	0	76	Fungi{superkingdom}(86);Ascomycota{phylum}(86);Dothideomycetes{class}(86);Capnodiales{order}(86);Cladosporiaceae{family}(86);Cladosporium{genus}(86);Cladosporium_tenuissimum{species}(86)	Fungi	Ascomycota	Dothideomycetes	Capnodiales	Cladosporiaceae	Cladosporium	Cladosporium_tenuissimum
ASV6545	0	72	0	0	0	0	0	0	0	0	0	0	0	0	0	72	Fungi{superkingdom}(75);Glomeromycota{phylum}(75);Glomeromycetes{class}(75);Glomerales{order}(75);Glomeraceae{family}(75);Unassigned{genus}(0);Unassigned{species}(0)	Fungi	Glomeromycota	Glomeromycetes	Glomerales	Glomeraceae	Unassigned	Unassigned
ASV6561	0	0	0	0	0	0	0	0	0	75	0	0	0	0	0	75	Fungi{superkingdom}(73);Ascomycota{phylum}(73);Unassigned{class}(0);Unassigned{order}(0);Unassigned{family}(0);Unassigned{genus}(0);Unassigned{species}(0)	Fungi	Ascomycota	Unassigned	Unassigned	Unassigned	Unassigned	Unassigned
ASV6598	0	33	0	0	0	0	0	0	0	0	0	0	0	0	0	33	Fungi{superkingdom}(93);Ascomycota{phylum}(93);Eurotiomycetes{class}(93);Chaetothyriales{order}(93);unidentified{family}(93);unidentified{genus}(93);unidentified{species}(93)	Fungi	Ascomycota	Eurotiomycetes	Chaetothyriales	unidentified	unidentified	unidentified
ASV6662	0	0	0	0	0	0	0	0	0	0	0	0	37	0	0	37	Fungi{superkingdom}(100);Unassigned{phylum}(0);Unassigned{class}(0);Unassigned{order}(0);Unassigned{family}(0);Unassigned{genus}(0);Unassigned{species}(0)	Fungi	Unassigned	Unassigned	Unassigned	Unassigned	Unassigned	Unassigned
ASV6738	0	0	0	0	0	0	0	0	73	0	0	0	0	0	0	73	Fungi{superkingdom}(66);unidentified{phylum}(66);unidentified{class}(66);unidentified{order}(66);unidentified{family}(66);unidentified{genus}(66);unidentified{species}(66)	Fungi	unidentified	unidentified	unidentified	unidentified	unidentified	unidentified
ASV6739	0	0	0	0	0	0	0	0	73	0	0	0	0	0	0	73	Fungi{superkingdom}(79);Ascomycota{phylum}(79);Sordariomycetes{class}(79);Hypocreales{order}(79);Nectriaceae{family}(79);Gibberella{genus}(79);Gibberella_avenacea{species}(79)	Fungi	Ascomycota	Sordariomycetes	Hypocreales	Nectriaceae	Gibberella	Gibberella_avenacea
ASV6745	0	0	0	0	0	0	0	0	0	0	0	73	0	0	0	73	Fungi{superkingdom}(94);unidentified{phylum}(94);unidentified{class}(94);unidentified{order}(94);unidentified{family}(94);unidentified{genus}(94);unidentified{species}(94)	Fungi	unidentified	unidentified	unidentified	unidentified	unidentified	unidentified
ASV6746	0	0	0	0	0	0	0	0	0	0	0	73	0	0	0	73	Fungi{superkingdom}(88);Basidiomycota{phylum}(88);Agaricomycetes{class}(88);Agaricales{order}(88);Entolomataceae{family}(88);Entoloma{genus}(88);Entoloma_rusticoides{species}(88)	Fungi	Basidiomycota	Agaricomycetes	Agaricales	Entolomataceae	Entoloma	Entoloma_rusticoides
ASV6747	0	0	0	0	0	0	0	0	0	0	0	27	0	0	0	27	Fungi{superkingdom}(79);Ascomycota{phylum}(79);Sordariomycetes{class}(79);Xylariales{order}(79);unidentified{family}(79);unidentified{genus}(79);unidentified{species}(79)	Fungi	Ascomycota	Sordariomycetes	Xylariales	unidentified	unidentified	unidentified
ASV6748	0	0	0	0	0	0	0	0	0	0	0	0	73	0	0	73	Fungi{superkingdom}(68);Ascomycota{phylum}(68);Sordariomycetes{class}(68);unidentified{order}(68);unidentified{family}(68);unidentified{genus}(68);unidentified{species}(68)	Fungi	Ascomycota	Sordariomycetes	unidentified	unidentified	unidentified	unidentified
ASV6760	0	0	0	0	0	0	0	0	0	0	0	0	21	0	0	21	Fungi{superkingdom}(73);unidentified{phylum}(73);unidentified{class}(73);unidentified{order}(73);unidentified{family}(73);unidentified{genus}(73);unidentified{species}(73)	Fungi	unidentified	unidentified	unidentified	unidentified	unidentified	unidentified
ASV6817	0	72	0	0	0	0	0	0	0	0	0	0	0	0	0	72	Fungi{superkingdom}(95);Basidiomycota{phylum}(95);Agaricomycetes{class}(95);Cantharellales{order}(95);Ceratobasidiaceae{family}(95);Thanatephorus{genus}(95);Thanatephorus_cucumeris{species}(95)	Fungi	Basidiomycota	Agaricomycetes	Cantharellales	Ceratobasidiaceae	Thanatephorus	Thanatephorus_cucumeris
ASV6824	0	0	0	0	0	0	0	0	0	0	0	72	0	0	0	72	Fungi{superkingdom}(100);Basidiomycota{phylum}(100);Agaricomycetes{class}(100);Agaricales{order}(100);Bolbitiaceae{family}(100);Conocybe{genus}(100);Conocybe_anthracophila{species}(100)	Fungi	Basidiomycota	Agaricomycetes	Agaricales	Bolbitiaceae	Conocybe	Conocybe_anthracophila
ASV6825	0	0	0	0	0	0	0	0	0	0	0	0	72	0	0	72	Fungi{superkingdom}(100);Unassigned{phylum}(0);Unassigned{class}(0);Unassigned{order}(0);Unassigned{family}(0);Unassigned{genus}(0);Unassigned{species}(0)	Fungi	Unassigned	Unassigned	Unassigned	Unassigned	Unassigned	Unassigned
ASV6826	0	0	0	0	0	0	0	0	0	0	0	0	0	72	0	72	Fungi{superkingdom}(63);unidentified{phylum}(63);unidentified{class}(63);unidentified{order}(63);unidentified{family}(63);unidentified{genus}(63);unidentified{species}(63)	Fungi	unidentified	unidentified	unidentified	unidentified	unidentified	unidentified
ASV6833	0	0	0	0	0	0	0	0	0	0	0	0	0	3	0	3	Fungi{superkingdom}(75);unidentified{phylum}(75);unidentified{class}(75);unidentified{order}(75);unidentified{family}(75);unidentified{genus}(75);unidentified{species}(75)	Fungi	unidentified	unidentified	unidentified	unidentified	unidentified	unidentified
ASV6898	0	17	0	0	0	0	0	0	0	0	0	0	0	0	0	17	Fungi{superkingdom}(71);Basidiomycota{phylum}(71);Tremellomycetes{class}(71);Tremellales{order}(71);Bulleribasidiaceae{family}(71);Dioszegia{genus}(71);Dioszegia_takashimae{species}(71)	Fungi	Basidiomycota	Tremellomycetes	Tremellales	Bulleribasidiaceae	Dioszegia	Dioszegia_takashimae
ASV6912	0	0	0	0	0	0	0	0	0	71	0	0	0	0	0	71	Fungi{superkingdom}(100);Unassigned{phylum}(0);Unassigned{class}(0);Unassigned{order}(0);Unassigned{family}(0);Unassigned{genus}(0);Unassigned{species}(0)	Fungi	Unassigned	Unassigned	Unassigned	Unassigned	Unassigned	Unassigned
ASV6915	0	0	0	0	0	0	0	0	0	0	0	33	0	0	0	33	Fungi{superkingdom}(99);Basidiomycota{phylum}(99);Agaricomycetes{class}(99);Hymenochaetales{order}(99);Schizoporaceae{family}(99);Lyomyces{genus}(99);Lyomyces_mascarensis{species}(99)	Fungi	Basidiomycota	Agaricomycetes	Hymenochaetales	Schizoporaceae	Lyomyces	Lyomyces_mascarensis
ASV6916	0	0	0	0	0	0	0	0	0	0	0	0	71	0	0	71	Fungi{superkingdom}(89);Ascomycota{phylum}(89);Sordariomycetes{class}(89);Coniochaetales{order}(89);Coniochaetaceae{family}(89);Coniochaeta{genus}(89);Coniochaeta_decumbens{species}(89)	Fungi	Ascomycota	Sordariomycetes	Coniochaetales	Coniochaetaceae	Coniochaeta	Coniochaeta_decumbens
ASV6942	0	0	0	0	0	0	24	0	0	0	0	0	0	0	0	24	Fungi{superkingdom}(61);unidentified{phylum}(61);unidentified{class}(61);unidentified{order}(61);unidentified{family}(61);unidentified{genus}(61);unidentified{species}(61)	Fungi	unidentified	unidentified	unidentified	unidentified	unidentified	unidentified
ASV6983	0	70	0	0	0	0	0	0	0	0	0	0	0	0	0	70	Fungi{superkingdom}(100);Unassigned{phylum}(0);Unassigned{class}(0);Unassigned{order}(0);Unassigned{family}(0);Unassigned{genus}(0);Unassigned{species}(0)	Fungi	Unassigned	Unassigned	Unassigned	Unassigned	Unassigned	Unassigned
ASV6984	0	0	70	0	0	0	0	0	0	0	0	0	0	0	0	70	Fungi{superkingdom}(100);Basidiomycota{phylum}(100);Agaricomycetes{class}(100);Agaricales{order}(100);Entolomataceae{family}(100);Entoloma{genus}(100);Entoloma_rusticoides{species}(100)	Fungi	Basidiomycota	Agaricomycetes	Agaricales	Entolomataceae	Entoloma	Entoloma_rusticoides
ASV7000	0	0	0	0	0	70	0	0	0	0	0	0	0	0	0	70	Fungi{superkingdom}(63);unidentified{phylum}(63);unidentified{class}(63);unidentified{order}(63);unidentified{family}(63);unidentified{genus}(63);unidentified{species}(63)	Fungi	unidentified	unidentified	unidentified	unidentified	unidentified	unidentified
ASV7002	0	0	0	0	0	0	0	0	70	0	0	0	0	0	0	70	Fungi{superkingdom}(71);Mortierellomycota{phylum}(71);Mortierellomycetes{class}(71);Mortierellales{order}(71);Mortierellaceae{family}(71);Mortierella{genus}(71);Mortierella_paraensis{species}(71)	Fungi	Mortierellomycota	Mortierellomycetes	Mortierellales	Mortierellaceae	Mortierella	Mortierella_paraensis
ASV7091	0	0	0	0	0	69	0	0	0	0	0	0	0	0	0	69	Fungi{superkingdom}(80);Ascomycota{phylum}(80);Dothideomycetes{class}(80);Pleosporales{order}(80);Leptosphaeriaceae{family}(80);Leptosphaeria{genus}(80);Leptosphaeria_sclerotioides{species}(80)	Fungi	Ascomycota	Dothideomycetes	Pleosporales	Leptosphaeriaceae	Leptosphaeria	Leptosphaeria_sclerotioides
ASV7106	0	0	0	0	0	0	0	0	0	0	0	0	0	0	34	34	Fungi{superkingdom}(81);Glomeromycota{phylum}(81);Glomeromycetes{class}(81);Glomerales{order}(81);Glomeraceae{family}(81);Glomus{genus}(81);Glomus_aggregatum{species}(81)	Fungi	Glomeromycota	Glomeromycetes	Glomerales	Glomeraceae	Glomus	Glomus_aggregatum
ASV7128	0	0	0	0	0	0	0	0	16	0	0	0	0	0	0	16	Fungi{superkingdom}(66);unidentified{phylum}(66);unidentified{class}(66);unidentified{order}(66);unidentified{family}(66);unidentified{genus}(66);unidentified{species}(66)	Fungi	unidentified	unidentified	unidentified	unidentified	unidentified	unidentified
ASV7134	0	0	0	0	6	0	0	0	0	0	0	0	0	0	0	6	Fungi{superkingdom}(64);Ascomycota{phylum}(64);unidentified{class}(64);unidentified{order}(64);unidentified{family}(64);unidentified{genus}(64);unidentified{species}(64)	Fungi	Ascomycota	unidentified	unidentified	unidentified	unidentified	unidentified
ASV7174	0	68	0	0	0	0	0	0	0	0	0	0	0	0	0	68	Fungi{superkingdom}(97);unidentified{phylum}(97);unidentified{class}(97);unidentified{order}(97);unidentified{family}(97);unidentified{genus}(97);unidentified{species}(97)	Fungi	unidentified	unidentified	unidentified	unidentified	unidentified	unidentified
ASV7175	0	68	0	0	0	0	0	0	0	0	0	0	0	0	0	68	Fungi{superkingdom}(74);unidentified{phylum}(74);unidentified{class}(74);unidentified{order}(74);unidentified{family}(74);unidentified{genus}(74);unidentified{species}(74)	Fungi	unidentified	unidentified	unidentified	unidentified	unidentified	unidentified
ASV7187	0	0	0	0	0	0	8	0	0	0	0	0	0	0	0	8	Fungi{superkingdom}(76);unidentified{phylum}(76);unidentified{class}(76);unidentified{order}(76);unidentified{family}(76);unidentified{genus}(76);unidentified{species}(76)	Fungi	unidentified	unidentified	unidentified	unidentified	unidentified	unidentified
ASV7193	0	0	0	0	0	0	0	0	0	0	0	68	0	0	0	68	Fungi{superkingdom}(100);Basidiomycota{phylum}(100);Agaricomycetes{class}(100);Agaricales{order}(100);Entolomataceae{family}(100);Entoloma{genus}(100);Unassigned{species}(0)	Fungi	Basidiomycota	Agaricomycetes	Agaricales	Entolomataceae	Entoloma	Unassigned
ASV7255	5	0	0	0	0	0	0	0	0	0	0	0	0	0	0	5	Fungi{superkingdom}(100);Basidiomycota{phylum}(100);Agaricomycetes{class}(100);Agaricales{order}(100);Entolomataceae{family}(100);Entoloma{genus}(100);Entoloma_undulatosporum{species}(100)	Fungi	Basidiomycota	Agaricomycetes	Agaricales	Entolomataceae	Entoloma	Entoloma_undulatosporum
ASV7297	0	0	0	0	0	0	0	27	0	0	0	0	40	0	0	67	Fungi{superkingdom}(71);Ascomycota{phylum}(71);Unassigned{class}(0);Unassigned{order}(0);Unassigned{family}(0);Unassigned{genus}(0);Unassigned{species}(0)	Fungi	Ascomycota	Unassigned	Unassigned	Unassigned	Unassigned	Unassigned
ASV7301	0	0	0	0	0	0	0	0	0	67	0	0	0	0	0	67	Fungi{superkingdom}(62);Basidiomycota{phylum}(62);Agaricomycetes{class}(62);Unassigned{order}(0);Unassigned{family}(0);Unassigned{genus}(0);Unassigned{species}(0)	Fungi	Basidiomycota	Agaricomycetes	Unassigned	Unassigned	Unassigned	Unassigned
ASV7303	0	0	0	0	0	0	0	0	0	0	0	67	0	0	0	67	Fungi{superkingdom}(98);unidentified{phylum}(98);unidentified{class}(98);unidentified{order}(98);unidentified{family}(98);unidentified{genus}(98);unidentified{species}(98)	Fungi	unidentified	unidentified	unidentified	unidentified	unidentified	unidentified
[truncated: 1,638 more rows]
