# Supplementary material for: Years of sand fixation with Caragana korshinskii drive the enrichment of its rhizosphere functional microbes by accumulating soil N
Source: PeerJ journal article supplement (doi:10.7717/peerj.14271), 2022-11-01
Supplement: Duncans_tests_diff_P0.05_result_of_bacteria_in_fall.xlsx [file Duncans_tests_diff_P0.05_result_of_bacteria_in_fall.xlsx]

## Sheet: phylum
Taxon	Abbreviation	Mean.In.Ck18	Mean.In.Ck12	Mean.In.Ck6	pval
Verrucomicrobia	Verr	2890	720.667	904.6	0.0122023
Actinobacteria	Acti	58580.3	28184	34406.2	0.000178667
Chloroflexi	Chlo	19028.3	12140.2	7941.8	0.00739497
Proteobacteria	Prot	57001.8	27680.2	28640	0.0196759
Bacteroidetes	Bact	25372.7	6577.33	6531.6	0.0324623
Planctomycetes	Plan	9802.67	7056.33	5050	0.0470531
Firmicutes	Firm	4174	2180.33	1147.2	0.0500783

## Sheet: class
Taxon	Abbreviation	Mean.In.Ck18	Mean.In.Ck12	Mean.In.Ck6	pval
Opitutae	Opit	2170.33	252.333	409.6	0.0148227
Actinobacteria	Acti	57120.8	26922.7	33397	0.000229157
Alphaproteobacteria	α-prot	29199.5	11939.3	14321.6	0.0208008
Thermomicrobia	Ther	3480	1130.33	1493.6	0.0029935
Anaerolineae	Anae	6093.83	3740.5	2468	0.035437
Caldilineae	Cald	1445.67	685	475	0.00793788
Chloroflexia	Chlo	3559	3398.17	1437.8	0.0241109
Planctomycetia	Plan	9208.17	6739.83	4832.4	0.0500267
Deltaproteobacteria	δ-prot	2520.83	1266.33	1177.8	0.0273976
Acidobacteria_Gp6	Acid_Gp6	7918	5358	3452.6	0.0507802
Gammaproteobacteria	γ-prot	13412.2	6900.17	6428.8	0.0181018
