# Supplementary material for: Years of sand fixation with Caragana korshinskii drive the enrichment of its rhizosphere functional microbes by accumulating soil N
Source: PeerJ journal article supplement (doi:10.7717/peerj.14271), 2022-11-01
Supplement: Duncans_tests_diff_P0.05_result_of_bacteria_in_summer.xlsx [file Duncans_tests_diff_P0.05_result_of_bacteria_in_summer.xlsx]

## Sheet: phylum
Taxon	Abbreviation	Mean.In.Ck18	Mean.In.Ck12	Mean.In.Ck6	pval
Chloroflexi	Chlo	26264.8	22517.4	12545.8	0.00814786
Candidatus_Saccharibacteria	Cand	1371	211.4	408.4	0.00918669
Actinobacteria	Acti	70785	37112	42125.2	0.04502
Firmicutes	Firm	7674.2	6366	2034.8	0.048105
Planctomycetes	Plan	8993.8	9616.2	6165.4	0.0431711
Bacteroidetes	Bact	26958.8	11812.4	10462.2	0.0490734
Proteobacteria	Prot	54053.8	33633.6	31530.4	0.0489345

## Sheet: class
Taxon	Abbreviation	Mean.In.Ck18	Mean.In.Ck12	Mean.In.Ck6	pval
Anaerolineae	Anae	8055.6	6102.6	3596.2	0.00680566
Caldilineae	Cald	2029.6	1887.8	862.6	0.00918669
Flavobacteriia	Flav	4228.2	270.2	195.4	0.0323869
Chloroflexia	Chlo	4977	7035.8	2818	0.0387742
Thermomicrobia	Ther	5056.2	2294.6	2356.2	0.051929
Actinobacteria	Acti	67935.4	35749.6	40942	0.0502004
Bacilli	Baci	7624.6	6281	1975.4	0.0502004
Gammaproteobacteria	γ-prot	12209.8	4072.6	2900.4	0.0480866
Alphaproteobacteria	α-prot	28520.4	16261.8	17420.4	0.0481909
Deltaproteobacteria	δ-prot	5067.4	4921	4184.4	0.0490734
Sphingobacteriia	Sphi	16942	8023.6	7217.8	0.0473345
Betaproteobacteria	β-prot	7447.6	7599	6586.2	0.0494455
