# Supplementary material for: Years of sand fixation with Caragana korshinskii drive the enrichment of its rhizosphere functional microbes by accumulating soil N
Source: PeerJ journal article supplement (doi:10.7717/peerj.14271), 2022-11-01
Supplement: env_in_fall.xlsx [file env_in_fall.xlsx]

## Sheet: env
Sample	SM	pH	EC	SOC	AP	TP	AN	TN	C:N	C:P	N:P
Ck18-1	3.09362	7.82	107.5	1.3204	1.4	0.18225	9.81744	0.172822	7.64019	7.24495	0.948268
Ck18-2	2.42145	7.94	104.2	1.67017	1.7	0.201661	7.01246	0.237857	7.02171	8.28206	1.17949
Ck18-3	1.43608	7.98	68.5	0.731781	1.38889	0.0986193	4.18654	0.110567	6.61845	7.42026	1.12115
Ck18-4	2.11473	8.05	74.5	0.984098	1.29482	0.150794	6.31121	0.149084	6.60095	6.52612	0.988665
Ck18-5	1.53846	7.83	95.1	0.948473	1.89243	0.186879	10.3632	0.185126	5.12338	5.07534	0.990623
Ck18-6	2.58003	8.33	111.3	1.01868	2.29084	0.150257	9.1162	0.176968	5.75628	6.77958	1.17777
Ck12-1	1.06302	7.1	46.3	1.6805	1.38889	0.136	4.20748	0.164575	10.2112	12.3566	1.21011
Ck12-2	1.30502	7.23	79.9	1.02092	1.39442	0.182178	3.47151	0.0752538	13.5663	5.60394	0.413078
Ck12-3	1.50754	7.08	24.8	0.946395	1.4	0.151515	4.16582	0.0867653	10.9075	6.24621	0.572651
Ck12-4	1.30868	7.45	38.3	0.768997	1.3	0.162441	5.58206	0.0723442	10.6297	4.73402	0.445358
Ck12-5	2.33362	7.27	45.4	0.791921	1.78571	0.238474	4.18654	0.0948585	8.34845	3.32079	0.397773
Ck12-6	4.35268	7.24	34.3	1.00891	1.5	0.210151	7.71371	0.0782357	12.8957	4.80087	0.372284
Ck6-1	0.780078	7.28	47.2	0.744669	1.39442	0.179969	4.90872	0.0921236	8.08336	4.13777	0.511887
Ck6-2	3.17412	7.29	40.9	1.33213	1.79283	0.131474	4.18654	0.103538	12.8661	10.1323	0.787516
Ck6-3	3.18269	7.34	48.9	2.02942	1.68651	0.188235	3.47151	0.0933148	21.7481	10.7813	0.495735
Ck6-4	3.23657	7.14	40.2	2.15548	1.3834	0.143027	4.8843	0.0948774	22.7186	15.0704	0.663351
Ck6-5	3.3237	7.18	45.2	1.3695	1.28968	0.180534	3.50623	0.0963015	14.221	7.58585	0.533426
