# Supplementary material for: Years of sand fixation with Caragana korshinskii drive the enrichment of its rhizosphere functional microbes by accumulating soil N
Source: PeerJ journal article supplement (doi:10.7717/peerj.14271), 2022-11-01
Supplement: Tab_S1-Total-seqStat.xlsx [file Tab_S1-Total-seqStat.xlsx]

## Sheet: Sheet1
Sample-id	Summer				Fall
	Bacteria		Fungi		Bacteria		Fungi
	Filtered	Percentage (%)	Filtered	Percentage (%)	Filtered	Percentage (%)	Filtered	Percentage (%)
CK18-1	217788	93.57	71143	88.19	205159	94.89	67356	91.55
CK18-2	214565	94.14	72367	84.49	218401	94.24	71284	88.94
CK18-3	214794	93.73	69430	88.81	218000	94.19	74277	92.38
CK18-4	208992	93.85	74545	86.47	203385	94.63	66982	92.32
CK18-5	210994	93.97	70014	90.61	217791	94.18	71338	90.47
CK18-6	/	/	/	/	212953	94.67	67907	91.95
CK12-1	210947	93.82	72307	85.42	205989	94.09	14437	91.09
CK12-2	207086	94.19	61434	89.85	203608	93.83	58597	93.29
CK12-3	210620	93.17	78081	79.94	204311	94.57	52025	92.76
CK12-4	215465	93.69	69090	88	214760	94.86	68155	90.57
CK12-5	219042	93.95	81553	82.05	210725	94.92	69628	91.79
CK12-6	/	/	/	/	214356	93.77	39212	90.86
CK6-1	205043	93.45	70060	90.14	206057	94.08	68056	92.99
CK6-2	219955	93.98	72698	87.95	208511	93.73	48102	89.56
CK6-3	214032	93.53	71034	84.48	215736	94.5	68808	90.42
CK6-4	207369	93.82	67907	88.87	206396	94.67	70796	92.1
CK6-5	209813	94.03	73626	82.27	211336	94.87	69308	91.17
